# Supplementary material for: Metabolic signaling controls intergenerational adaptive responses via peroxisomal catabolism
Source: Research Square preprint supplement (doi:10.21203/rs.3.rs-6522513/v1), 2026-02-20
Supplement: Supplementary file 1 [file 714d186a6e7cc9c00215e898.xlsx]

## Sheet: Total gene expression changes
Table S2. Total genes expression changes in sgk-1(lf) compared to wild type following CS.
gene_id	entrezid	symbol	baseMean	log2FoldChange	lfcSE	stat	pvalue	padj
WBGene00002091	26472	ins-8	12.577	-8.29309	3.52093	2.35536	0.0185045	0.0942733
WBGene00021601	10847	Y46H3A.5	1435.6	-7.68754	0.302689	25.3975	2.68767e-142	4.77599e-138
WBGene00220143	46683	Y38E10A.32	4.55799	-7.20372	2.48416	2.89987	0.00373321	0.0283899
WBGene00201301	17419	C10F3.15	5.33899	-7.17138	2.16027	3.31966	0.000901259	0.00889249
WBGene00016484	17198	C36C5.15	4.73449	-6.65464	2.43404	2.73399	0.00625711	0.0428143
WBGene00003608	21486	nhr-9	2.73615	-6.35397	2.74424	2.31538	0.0205921	NA
WBGene00175028	24995	nspe-8	58.5581	-6.32739	0.785744	8.05274	8.09633e-16	5.38846e-14
WBGene00012593	15164	nspe-7	1804.23	-6.29748	0.766109	8.22009	2.03345e-16	1.46293e-14
WBGene00219674	22439	linc-122	1.66216	-6.1229	4.45462	1.3745	0.169285	NA
WBGene00005896	21024	srx-5	1.53731	-6.02118	3.90031	1.54377	0.122645	NA
WBGene00020244	12311	T05B4.13	1.61661	-6.01214	4.0582	1.48148	0.138479	NA
WBGene00018248	21182	F40G9.14	4.86296	-5.90268	1.85685	3.17887	0.00147849	0.0134802
WBGene00044074	15348	mltn-5	3.69353	-5.84261	1.91102	3.05733	0.00223318	0.0187896
WBGene00044542	18315	CD4.11	1.99834	-5.83682	3.15343	1.85094	0.064178	NA
WBGene00021591	20126	Y46D2A.3	3.44939	-5.64348	2.8139	2.00557	0.0449021	0.17354
WBGene00018404	19240	nhr-39	1.8863	-5.59925	3.22458	1.73643	0.0824885	NA
WBGene00022256	9392	Y73B6BL.37	3.0392	-5.57525	2.90309	1.92045	0.0548008	NA
WBGene00006130	19023	str-68	3.59718	-5.57522	2.83645	1.96556	0.0493494	0.184969
WBGene00219310	21946	C17E4.19	3.12482	-5.57464	2.07121	2.69149	0.00711345	NA
WBGene00206363	8965	F56H1.10	2.51961	-5.56347	2.33954	2.37802	0.0174058	NA
WBGene00197327	43470	F48C5.7	1.3809	-5.55072	4.10723	1.35145	0.176551	NA
WBGene00021285	18809	Y24D9A.7	2.13658	-5.47178	2.62152	2.08726	0.036865	NA
WBGene00005622	23138	srj-38	0.862992	-5.38968	5.96241	0.903943	0.366025	NA
WBGene00006134	20490	str-73	1.04636	-5.38968	5.96241	0.903943	0.366025	NA
WBGene00006210	21035	str-165	1.93045	-5.38899	3.78931	1.42216	0.154981	NA
WBGene00195410	22400	C39B5.15	1.48523	-5.36781	3.23121	1.66124	0.0966661	NA
WBGene00019567	20597	K09D9.9	1.5276	-5.34688	3.13665	1.70464	0.0882607	NA
WBGene00199370	44626	F25B4.14	1.17112	-5.33964	5.00218	1.06746	0.285763	NA
WBGene00000860	6507	cwp-2	2.29098	-5.33273	3.33217	1.60038	0.109515	NA
WBGene00015985	21152	C18G1.7	1.28819	-5.33264	3.60539	1.47907	0.139121	NA
WBGene00005807	14538	srw-60	1.68552	-5.31796	4.25853	1.24878	0.211746	NA
WBGene00012456	14165	Y17D7C.2	4.47174	-5.31712	1.81948	2.92232	0.00347431	0.0269483
WBGene00200809	16398	T04C12.28	2.09863	-5.31225	2.70238	1.96577	0.0493253	NA
WBGene00005898	18031	srx-7	1.30353	-5.30341	4.04189	1.31211	0.189483	NA
WBGene00012088	23506	T27E7.3	3.49943	-5.2244	1.97422	2.64632	0.00813738	0.0522026
WBGene00077646	21830	Y51A2A.14	0.993536	-5.21739	5.56774	0.937076	0.34872	NA
WBGene00200046	12435	Y47G6A.34	1.337	-5.21	2.91725	1.78593	0.0741107	NA
WBGene00235159	46753	CD4.17	0.714844	-5.20146	5.96438	0.872087	0.383161	NA
WBGene00000213	6	asm-3	1745.91	-5.14217	0.300065	17.1368	7.88077e-66	7.37059e-63
WBGene00011855	17617	clec-183	2.46317	-5.10776	2.61053	1.95659	0.0503951	NA
WBGene00077758	24464	irld-12	0.940951	-5.09247	5.65755	0.900119	0.368057	NA
WBGene00017562	20575	F18C5.9	2.21598	-5.09221	3.33955	1.52482	0.127305	NA
WBGene00200584	19415	B0334.19	1.65948	-5.08382	2.85893	1.77823	0.0753668	NA
WBGene00194785	18375	C52E4.12	3.13809	-5.07578	2.54394	1.99524	0.0460167	NA
WBGene00195425	16831	ZC8.7	1.91033	-5.06699	3.31097	1.53037	0.125926	NA
WBGene00005685	12549	sru-22	52.9481	-5.06477	0.639008	7.92598	2.26352e-15	1.44168e-13
WBGene00019159	18759	H05C05.3	2.99195	-5.06102	2.18652	2.31465	0.0206322	NA
WBGene00017221	22224	dgn-3	2.2446	-5.06056	2.27854	2.22097	0.0263531	NA
WBGene00023454	20151	mir-357	1.74953	-5.05928	2.71086	1.8663	0.0619989	NA
WBGene00019926	23863	fbxc-27	2.16301	-5.0587	3.09684	1.63351	0.102362	NA
WBGene00050363	20667	21ur-1333	0.769526	-5.05757	5.96607	0.847722	0.396593	NA
WBGene00010526	17117	K03B8.11	3.46923	-5.04511	2.25799	2.23434	0.0254609	0.118471
WBGene00012067	23502	sqst-3	3.32969	-4.97209	2.88124	1.72568	0.0844055	0.257182
WBGene00000642	22962	col-66	1.45673	-4.96449	3.94432	1.25864	0.208159	NA
WBGene00219980	46599	F56D1.17	2.13957	-4.96222	2.53468	1.95773	0.0502618	NA
WBGene00021484	22801	Y40A1A.2	6.22976	-4.94979	1.92096	2.57673	0.00997404	0.0606417
WBGene00006419	23277	oac-39	1.50382	-4.9364	3.09539	1.59476	0.110766	NA
WBGene00015342	16655	C02E7.10	1598.11	-4.92881	1.54365	3.19296	0.00140822	0.012919
WBGene00013356	23553	Y59A8B.24	1.19251	-4.91748	4.58213	1.07319	0.283187	NA
WBGene00199897	20841	R13H4.11	0.703963	-4.91731	5.96788	0.823963	0.409961	NA
WBGene00197286	25427	C42D8.13	1.12131	-4.90804	4.02688	1.21882	0.222912	NA
WBGene00001532	8513	gcy-5	90.3531	-4.8056	0.49078	9.79177	1.22144e-22	1.5843e-20
WBGene00017960	16682	F31F4.11	0.951405	-4.80452	5.96947	0.804847	0.420908	NA
WBGene00202335	11452	K11G9.14	0.56292	-4.80452	5.96947	0.804847	0.420908	NA
WBGene00020773	23892	T24E12.3	1.51735	-4.8039	4.33858	1.10725	0.268185	NA
WBGene00005868	19997	srw-121	2.40253	-4.80111	2.6878	1.78626	0.0740573	NA
WBGene00171177	12403	21ur-13616	0.696875	-4.79397	5.96963	0.803061	0.42194	NA
WBGene00007721	9111	C25D7.12	9.88135	-4.78862	1.40622	3.40532	0.000660872	0.00684654
WBGene00174231	19856	21ur-10524	0.873447	-4.78336	5.96979	0.801261	0.42298	NA
WBGene00198292	25611	T14F9.14	0.541706	-4.78336	5.96979	0.801261	0.422981	NA
WBGene00015840	14216	math-11	1.22917	-4.78312	4.57122	1.04636	0.295397	NA
WBGene00202168	8959	F43C9.9	0.96513	-4.78297	4.10371	1.16552	0.243807	NA
WBGene00022616	23960	hsd-3	1.65242	-4.78237	3.20619	1.49161	0.135802	NA
WBGene00021233	2414	Y19D10B.4	26.472	-4.78134	2.58498	1.84966	0.0643621	0.218561
WBGene00219740	19935	linc-117	2.77297	-4.78103	2.47717	1.93004	0.0536022	NA
WBGene00011357	1709	T01H10.4	2.25389	-4.78022	2.2681	2.10759	0.0350666	NA
WBGene00045371	28505	M163.15	0.92008	-4.77265	5.73446	0.832275	0.405254	NA
WBGene00048157	24291	21ur-1796	1.23192	-4.77226	3.40474	1.40165	0.161019	NA
WBGene00009838	11132	fbxa-187	40.0217	-4.76844	1.61297	2.95632	0.00311338	0.0246579
WBGene00046397	29308	21ur-1460	1.11431	-4.76191	3.69455	1.2889	0.197433	NA
WBGene00196743	15414	K10C3.9	1.32743	-4.76189	3.18384	1.49564	0.134747	NA
WBGene00017172	14721	F02C9.1	3.35669	-4.76168	2.02116	2.35591	0.0184775	0.0942165
WBGene00219937	26853	F37F2.4	0.81712	-4.75116	4.8366	0.982336	0.325934	NA
WBGene00197539	43599	C07H6.13	0.630906	-4.75104	5.97027	0.795784	0.426158	NA
WBGene00044088	11372	oac-2	4.18578	-4.74414	2.09561	2.26384	0.0235839	0.112536
WBGene00020899	17772	T28D9.11	2.91189	-4.74278	2.36365	2.00655	0.0447975	NA
WBGene00016075	14221	C24H12.6	2.85486	-4.7426	2.4167	1.96243	0.0497128	NA
WBGene00005452	14050	srh-246	2.34401	-4.74241	2.47806	1.91376	0.055651	NA
WBGene00006076	16522	str-8	1.38108	-4.7413	3.07755	1.54061	0.123413	NA
WBGene00006631	14550	tsp-5	2.44866	-4.74124	3.11986	1.5197	0.128588	NA
WBGene00020535	20119	T16A1.4	1.18637	-4.74066	3.91941	1.20953	0.226458	NA
WBGene00044265	14349	Y105E8B.11	1.15694	-4.74044	4.45448	1.0642	0.287239	NA
WBGene00005344	23070	srh-127	1.02314	-4.7404	4.55741	1.04015	0.298269	NA
WBGene00005359	23077	srh-142	0.856548	-4.74031	4.95381	0.956901	0.338617	NA
WBGene00167883	24618	21ur-12323	0.480189	-4.74012	5.97044	0.793932	0.427235	NA
WBGene00016253	21154	C30E1.4	0.664934	-4.74012	5.97044	0.793931	0.427235	NA
WBGene00045075	24109	W04G5.12	0.944951	-4.72921	5.53302	0.854725	0.392703	NA
WBGene00005104	19519	srd-26	2.38481	-4.71979	3.39977	1.38827	0.165056	NA
WBGene00005126	18527	srd-48	1.40918	-4.71919	3.84395	1.22769	0.219563	NA
WBGene00005827	9584	srw-80	0.661794	-4.71802	5.97078	0.790185	0.42942	NA
WBGene00197222	25415	F29G9.10	0.472769	-4.71802	5.97078	0.790185	0.42942	NA
WBGene00012604	6710	nspe-2	285.712	-4.69624	0.443148	10.5975	3.06189e-26	5.18188e-24
WBGene00013602	15661	Y87G2A.16	352.821	-4.6875	0.261847	17.9017	1.14463e-71	1.35601e-68
WBGene00012590	23525	nspe-3	17.2006	-4.66196	4.9073	0.950006	0.342109	0.578814
WBGene00022827	18296	ZK816.4	2.08851	-4.60889	2.94676	1.56405	0.117805	NA
WBGene00198826	25697	F43G9.16	1.58941	-4.59743	2.85709	1.60913	0.107588	NA
WBGene00046446	20649	21ur-4004	0.432224	-4.58763	5.9729	0.768073	0.442444	NA
WBGene00006126	13560	str-63	1.46181	-4.58702	3.66855	1.25036	0.211166	NA
WBGene00198182	19899	F56F3.11	0.930162	-4.575	3.07631	1.48717	0.13697	NA
WBGene00045123	28435	W01D2.7	0.573366	-4.56308	5.97333	0.763909	0.444922	NA
WBGene00047436	21271	21ur-936	1.78133	-4.55356	2.26826	2.00751	0.0446953	NA
WBGene00219554	13957	W03D2.11	2.73031	-4.55343	2.29809	1.9814	0.0475468	NA
WBGene00014633	19180	ZK897.4	1.57828	-4.54044	2.89406	1.56888	0.116675	NA
WBGene00005166	18528	srg-8	0.813753	-4.53812	5.97376	0.759675	0.447449	NA
WBGene00174448	20728	21ur-15343	0.543216	-4.52548	5.97399	0.75753	0.448732	NA
WBGene00045931	28883	21ur-4427	0.460348	-4.52547	5.97399	0.75753	0.448732	NA
WBGene00017312	5813	pitr-5	1281.42	-4.46333	0.208251	21.4324	6.65891e-102	2.36658e-98
WBGene00015409	18704	C03H5.7	12.6839	-4.41664	1.21931	3.62226	0.000292045	0.00342516
WBGene00198291	44028	Y51A2D.31	0.376838	-4.38927	5.97653	0.734418	0.462694	NA
WBGene00005236	21502	srh-10	0.497776	-4.38927	5.97653	0.734418	0.462694	NA
WBGene00016673	23747	ttbk-6	0.574921	-4.38927	5.97653	0.734418	0.462694	NA
WBGene00022640	23961	nhr-254	0.624561	-4.38927	5.97653	0.734418	0.462694	NA
WBGene00017006	23760	D1007.9	0.490456	-4.38927	5.97653	0.734418	0.462694	NA
WBGene00196937	21359	T01C1.8	0.551432	-4.38927	5.97653	0.734418	0.462694	NA
WBGene00023346	15339	T13B5.t1	0.975842	-4.38926	5.97652	0.734417	0.462695	NA
WBGene00201869	17424	ZC247.8	0.692425	-4.38905	5.33702	0.822379	0.410861	NA
WBGene00045099	24112	Y67A10A.13	0.758305	-4.38898	5.17087	0.848788	0.395999	NA
WBGene00009751	12609	F46A8.8	1.23029	-4.3887	4.68208	0.937339	0.348584	NA
WBGene00202110	16434	M01D7.10	1.48551	-4.38843	4.31872	1.01614	0.309563	NA
WBGene00005781	23170	srw-34	1.35597	-4.38779	3.76121	1.16659	0.243376	NA
WBGene00005370	23081	srh-154	1.201	-4.38732	3.4774	1.26167	0.207068	NA
WBGene00012413	13683	Y7A5A.7	2.12987	-4.38711	3.37378	1.30035	0.19348	NA
WBGene00020305	22776	T07D3.2	4.14296	-4.38167	2.28803	1.91504	0.0554876	0.199517
WBGene00199042	25743	H34C03.20	0.437899	-4.37527	5.9768	0.732041	0.464143	NA
WBGene00044100	24048	srbc-27	0.476729	-4.36113	5.97708	0.729642	0.465609	NA
WBGene00173168	24897	21ur-12110	1.19783	-4.36113	5.97708	0.729642	0.465609	NA
WBGene00185116	24998	W09C2.8	0.540562	-4.36112	5.97708	0.729641	0.465609	NA
WBGene00000026	22457	abu-3	1.07404	-4.36094	4.68242	0.931342	0.351677	NA
WBGene00220135	12956	Y18D10A.29	0.817111	-4.36081	4.22823	1.03136	0.302374	NA
WBGene00016476	13743	srab-10	1.26683	-4.36072	3.98597	1.09402	0.273947	NA
WBGene00202141	16923	R06B10.8	0.950845	-4.36072	3.97403	1.0973	0.272508	NA
WBGene00005843	12551	srw-96	1.28167	-4.36048	3.52518	1.23695	0.216105	NA
WBGene00268206	15463	F54E2.9	1.5517	-4.36045	3.47571	1.25455	0.209643	NA
WBGene00173198	20264	21ur-9574	1.24247	-4.36037	3.36615	1.29536	0.195197	NA
WBGene00018434	23809	ceh-81	1.22625	-4.36034	3.33779	1.30636	0.191431	NA
WBGene00014217	10230	ZK1086.3	1.93703	-4.36028	3.26399	1.33588	0.18159	NA
WBGene00014734	19182	F11A3.3	1.38011	-4.36011	3.09114	1.41052	0.158386	NA
WBGene00021911	18822	Y55B1BR.1	1.86358	-4.3599	2.92043	1.4929	0.135464	NA
WBGene00236785	17452	Y73B6A.16	2.07506	-4.35939	2.6218	1.66274	0.0963638	NA
WBGene00018385	10307	F43C11.8	3.52575	-4.35873	2.38057	1.83096	0.0671067	0.223983
WBGene00009817	18610	F47B10.6	1.94071	-4.35851	2.31806	1.88025	0.0600746	NA
WBGene00005659	23142	srr-8	2.80197	-4.35845	2.30212	1.89323	0.058327	NA
WBGene00012838	22649	Y43F8C.17	3.85338	-4.35725	2.07378	2.10111	0.0356312	0.149296
WBGene00007674	18564	C18D4.4	3.42725	-4.35651	1.97987	2.2004	0.0277783	0.125795
WBGene00009864	18615	F49B2.4	4.07442	-4.355	1.84839	2.3561	0.0184679	0.0941947
WBGene00023163	21237	W09G12.3	5.88387	-4.35369	1.7706	2.45888	0.0139373	0.0769445
WBGene00169583	37520	21ur-14673	13.1784	-4.3527	0.941195	4.62465	3.75224e-06	7.07827e-05
WBGene00173856	41247	21ur-11127	0.675294	-4.34687	5.21695	0.83322	0.40472	NA
WBGene00017170	23763	F01G12.1	0.699236	-4.34686	5.05092	0.860607	0.389454	NA
WBGene00196590	18902	B0035.19	0.609441	-4.34686	5.43213	0.800213	0.423587	NA
WBGene00219865	46543	C56G2.21	0.4634	-4.34686	5.97737	0.72722	0.467091	NA
WBGene00044285	443	thn-8	2.73459	-4.33563	2.11997	2.04514	0.0408414	NA
WBGene00020465	19282	T12E12.6	4.24772	-4.33507	2.24541	1.93064	0.0535279	0.195335
WBGene00017090	21164	E01A2.8	2.77537	-4.3348	2.32429	1.865	0.0621817	NA
WBGene00219651	10464	linc-130	2.09324	-4.33375	2.81963	1.53699	0.124295	NA
WBGene00010380	19103	mpst-2	1.40123	-4.33351	3.00892	1.44022	0.149805	NA
WBGene00014773	23649	F56D5.8	0.859885	-4.33278	4.27484	1.01355	0.310796	NA
WBGene00219222	16933	mir-4806	0.706505	-4.33259	5.06957	0.854627	0.392758	NA
WBGene00005862	26780	srw-115	0.707854	-4.33256	5.20923	0.831709	0.405573	NA
WBGene00171311	39030	21ur-11261	0.361997	-4.33245	5.97766	0.724774	0.468591	NA
WBGene00046590	24199	21ur-1663	0.694108	-4.33245	5.97766	0.724773	0.468591	NA
WBGene00166939	20227	21ur-15373	1.12329	-4.33072	4.32424	1.0015	0.316586	NA
WBGene00200754	45424	F45D3.12	1.52876	-4.32686	3.04765	1.41973	0.155685	NA
WBGene00174467	24961	21ur-10359	0.418756	-4.31791	5.97795	0.722305	0.470107	NA
WBGene00220054	20446	T01A4.8	0.458618	-4.3179	5.97795	0.722305	0.470107	NA
WBGene00194869	17885	K01A6.8	6.1079	-4.3091	2.51935	1.7104	0.0871914	0.262426
WBGene00008798	14595	F14D7.11	2.58304	-4.30787	2.71812	1.58487	0.112996	NA
WBGene00018726	14270	F53A9.3	1.49279	-4.30713	2.87451	1.49839	0.134032	NA
WBGene00020431	22779	irld-50	1.58651	-4.30621	3.13277	1.37457	0.169265	NA
WBGene00010531	14623	K03D3.5	2.34534	-4.30609	3.17368	1.35681	0.17484	NA
WBGene00008472	16560	E03H4.4	1.98269	-4.30554	3.396	1.26783	0.204859	NA
WBGene00269346	14463	R07C3.17	1.22848	-4.30465	3.90918	1.10117	0.270825	NA
WBGene00006153	20005	str-96	0.895142	-4.3042	4.29406	1.00236	0.316169	NA
WBGene00005339	23068	srh-120	1.14938	-4.30391	4.64346	0.926875	0.353991	NA
WBGene00045398	12885	Y71F9AM.8	0.967419	-4.30374	4.88214	0.881527	0.378033	NA
WBGene00196969	25365	R03E9.6	0.930085	-4.30367	4.98856	0.862706	0.388299	NA
WBGene00167465	35633	21ur-13657	0.408232	-4.30322	5.97826	0.719811	0.471641	NA
WBGene00023348	28235	T24E12.7	0.453669	-4.30322	5.97826	0.719811	0.471641	NA
WBGene00014694	19181	C33D3.2	0.617533	-4.30322	5.97826	0.719811	0.471641	NA
WBGene00005429	26661	srh-219	0.354577	-4.30322	5.97826	0.719811	0.471641	NA
WBGene00077611	33410	F11A5.19	0.354577	-4.30322	5.97826	0.719811	0.471641	NA
WBGene00195243	20280	F46B3.23	0.354577	-4.30322	5.97826	0.719811	0.471641	NA
WBGene00023488	16754	srz-84	0.492646	-4.30322	5.97826	0.719811	0.471641	NA
WBGene00011818	21095	srt-57	0.452269	-4.30322	5.97826	0.719811	0.471641	NA
WBGene00005536	19986	sri-24	0.481362	-4.30322	5.97826	0.719811	0.471641	NA
WBGene00195476	42446	F33D11.13	0.55266	-4.30322	5.97826	0.719811	0.471641	NA
WBGene00005565	26704	sri-53	0.582826	-4.30322	5.97826	0.719811	0.471641	NA
WBGene00195536	42479	C55A6.14	0.722665	-4.30322	5.97826	0.719811	0.471641	NA
WBGene00169319	14379	21ur-13902	0.863712	-4.30322	5.97826	0.719811	0.471641	NA
WBGene00013372	27267	Y61B8B.2	0.68026	-4.30322	5.97826	0.719811	0.471641	NA
WBGene00013648	2780	Y105C5B.7	32.2563	-4.27898	0.809026	5.28905	1.2295e-07	2.98882e-06
WBGene00005242	14527	srh-17	6.78955	-4.18572	1.5437	2.71149	0.00669819	0.0451372
WBGene00005228	6108	srh-2	44.3763	-4.18327	0.684691	6.10972	9.98047e-10	3.33998e-08
WBGene00044405	8424	C29F7.8	4.12437	-4.18074	4.72125	0.885514	0.37588	0.608212
WBGene00044521	10391	Y5H2A.4	5.37523	-4.17808	1.70112	2.45607	0.0140464	0.0773488
WBGene00012451	19145	Y17D7B.3	102.086	-4.15264	0.482309	8.60992	7.31104e-18	6.21613e-16
WBGene00171438	24790	21ur-7393	0.668158	-4.12607	5.98216	0.689729	0.490365	NA
WBGene00013909	27291	srbc-44	0.76416	-4.12607	5.98216	0.689728	0.490365	NA
WBGene00195700	15901	F13D12.11	0.629688	-4.12606	5.98216	0.689728	0.490365	NA
WBGene00197761	21892	C18A11.10	0.677426	-4.12579	5.32335	0.775037	0.438318	NA
WBGene00195006	11919	C35B1.9	0.896072	-4.12556	4.92198	0.838191	0.401924	NA
WBGene00020755	19290	grl-31	1.60561	-4.12346	3.36508	1.22537	0.220437	NA
WBGene00045133	28439	M163.13	0.310322	-4.10931	5.98256	0.686882	0.492157	NA
WBGene00196856	25344	R10E11.10	0.403672	-4.10931	5.98256	0.686882	0.492157	NA
WBGene00165222	33653	21ur-14927	0.51946	-4.10926	5.75973	0.713446	0.47557	NA
WBGene00201941	26278	C37E2.9	1.32578	-4.10825	3.79749	1.08183	0.279326	NA
WBGene00220243	17950	ZK484.11	2.09676	-4.10499	2.4728	1.66006	0.0969032	NA
WBGene00000136	16468	amt-4	2495.47	-4.09737	0.235959	17.3647	1.52647e-67	1.59561e-64
WBGene00047717	21817	21ur-1077	0.404978	-4.09237	5.98296	0.684004	0.493973	NA
WBGene00199273	44573	R12B2.10	0.735856	-4.09237	5.98296	0.684004	0.493973	NA
WBGene00197140	25407	F29D10.6	0.487705	-4.09235	5.75683	0.710868	0.477166	NA
WBGene00023387	19325	Y67D2.t3	1.09893	-4.09168	3.18141	1.28612	0.1984	NA
WBGene00199250	16365	C36F7.18	1.08178	-4.09167	3.18042	1.28652	0.198262	NA
WBGene00011992	21622	T24D5.4	1.52669	-4.09132	2.80427	1.45896	0.144577	NA
WBGene00008223	8620	lgc-48	2.21084	-4.0912	2.71014	1.50959	0.131149	NA
WBGene00199744	44841	R07B5.11	2.68706	-4.09112	2.66048	1.53774	0.124113	NA
WBGene00020545	18253	adbp-2	4.15684	-4.08987	2.15676	1.8963	0.0579203	0.204784
WBGene00018630	18748	F49D11.6	4.64559	-4.08879	1.95375	2.09279	0.036368	0.151349
WBGene00008519	18581	cyp-13B1	430.474	-4.08258	0.342418	11.9228	9.00137e-33	2.22159e-30
WBGene00198093	18909	F55A12.14	1.68628	-4.07606	2.86557	1.42242	0.154904	NA
WBGene00219652	14453	linc-65	0.302901	-4.07523	5.98337	0.681092	0.495813	NA
WBGene00220035	18947	M60.15	0.421457	-4.07523	5.98337	0.681092	0.495813	NA
WBGene00166160	34472	21ur-14161	0.403232	-4.07523	5.98337	0.681092	0.495813	NA
WBGene00045375	22372	C17D12.8	0.445772	-4.07523	5.98337	0.681092	0.495813	NA
WBGene00050910	9933	Y43F8B.17	1.86036	-4.06045	2.92254	1.38935	0.164725	NA
WBGene00049662	14853	21ur-795	0.762576	-4.05955	3.35956	1.20836	0.22691	NA
WBGene00199315	44593	T04C12.23	0.773934	-4.05901	3.78528	1.07231	0.283579	NA
WBGene00169578	13388	21ur-7740	1.203	-4.05901	3.78601	1.07211	0.283672	NA
WBGene00200756	10449	H01A20.4	0.767797	-4.05812	5.22042	0.777356	0.436949	NA
WBGene00199738	16376	C11G10.11	0.591446	-4.05801	5.56139	0.729676	0.465588	NA
WBGene00268199	26929	C45H4.21	0.490916	-4.0579	5.9838	0.678148	0.497678	NA
WBGene00047164	29992	21ur-5275	0.299191	-4.0579	5.9838	0.678148	0.497678	NA
WBGene00001959	11516	hlh-15	0.470335	-4.05789	5.9838	0.678147	0.497678	NA
WBGene00005594	10550	srj-6	5.06056	-4.04217	1.66981	2.42074	0.015489	0.0831626
WBGene00201273	20409	F46B6.15	0.863884	-4.04091	4.97304	0.812564	0.416468	NA
WBGene00220068	26873	T12D8.12	0.816728	-4.0408	5.1355	0.786837	0.431377	NA
WBGene00202301	46301	F35G2.21	0.349136	-4.04037	5.98423	0.675169	0.499568	NA
WBGene00236799	8980	F54E2.8	0.505968	-4.04037	5.98423	0.675169	0.499568	NA
WBGene00198932	20815	F29C4.11	0.622927	-4.04036	5.98423	0.675169	0.499569	NA
WBGene00018093	8805	F36F12.2	0.603119	-4.04036	5.98423	0.675168	0.499569	NA
WBGene00000308	19467	C04A11.t1	1.93137	-4.04017	3.08028	1.31163	0.189647	NA
WBGene00009689	15106	F44E5.2	12.6835	-4.0205	1.0797	3.72372	0.000196311	0.0024259
WBGene00018643	10309	drd-50	478.411	-4.00419	0.297287	13.4691	2.37791e-41	7.97272e-39
WBGene00001891	5027	his-17	4.21532	-3.98753	1.7786	2.24194	0.0249651	0.11696
WBGene00007439	14079	C08E8.3	307.439	-3.97211	0.231097	17.1881	3.25996e-66	3.2183e-63
WBGene00077605	33408	F36G9.17	1.975	-3.95065	2.93605	1.34557	0.178443	NA
WBGene00005002	2089	spp-17	9517.56	-3.93727	0.251275	15.6692	2.45805e-55	1.50619e-52
WBGene00045408	21265	F31E9.8	1.25992	-3.90561	4.59008	0.850882	0.394835	NA
WBGene00012594	9217	nspe-5	47.3295	-3.89628	0.862534	4.51725	6.26481e-06	0.000113598
WBGene00010182	14614	F57A8.7	8.87633	-3.89082	1.57242	2.47442	0.0133452	0.0744566
WBGene00196334	11932	F40F12.11	3.58533	-3.88551	1.84577	2.10509	0.0352838	0.148471
WBGene00268216	10976	F49B2.9	6.26698	-3.84254	1.58058	2.4311	0.0150531	0.081503
WBGene00005815	95	srw-68	3.52224	-3.83965	1.66988	2.29935	0.0214848	0.105204
WBGene00017498	12749	pud-4	896.194	-3.81743	0.172049	22.188	4.48606e-109	2.65724e-105
WBGene00018973	6368	srz-20	0.685155	-3.8039	5.99061	0.634977	0.525444	NA
WBGene00000014	26448	abf-3	0.251225	-3.80389	5.99061	0.634976	0.525444	NA
WBGene00004141	22991	pqn-57	0.251225	-3.80389	5.99061	0.634976	0.525444	NA
WBGene00043187	28289	nspa-9	0.251225	-3.80389	5.99061	0.634976	0.525444	NA
WBGene00048802	31450	21ur-2573	0.251225	-3.80389	5.99061	0.634976	0.525444	NA
WBGene00172426	40003	21ur-13190	0.251225	-3.80389	5.99061	0.634976	0.525444	NA
WBGene00198749	16356	F52D10.10	0.251225	-3.80389	5.99061	0.634976	0.525444	NA
WBGene00199134	44486	R09F10.17	0.251225	-3.80389	5.99061	0.634976	0.525444	NA
WBGene00201608	45901	Y50D7A.18	0.251225	-3.80389	5.99061	0.634976	0.525444	NA
WBGene00220071	26874	T15H9.8	0.251225	-3.80389	5.99061	0.634976	0.525444	NA
WBGene00255729	46807	R11G11.16	0.251225	-3.80389	5.99061	0.634976	0.525444	NA
WBGene00011356	27174	lgc-15	0.372164	-3.80389	5.99061	0.634976	0.525444	NA
WBGene00017845	20577	srsx-9	0.498948	-3.80389	5.99061	0.634976	0.525444	NA
WBGene00019053	23833	F58F6.5	0.465848	-3.80389	5.99061	0.634976	0.525444	NA
WBGene00005721	23154	srv-10	0.495456	-3.80389	5.99061	0.634976	0.525444	NA
WBGene00023247	20144	C33E10.7	0.561372	-3.80389	5.99061	0.634976	0.525444	NA
WBGene00005539	23119	sri-27	0.592143	-3.80389	5.99061	0.634976	0.525444	NA
WBGene00005458	20483	srh-252	0.637545	-3.80389	5.99061	0.634976	0.525444	NA
WBGene00202178	26327	F38A6.9	0.576093	-3.80389	5.99061	0.634976	0.525444	NA
WBGene00047751	24268	21ur-2767	0.367653	-3.80389	5.99061	0.634976	0.525444	NA
WBGene00014744	8738	F25H9.9	0.748574	-3.80389	5.99061	0.634976	0.525444	NA
WBGene00201678	20416	R13H8.5	0.336797	-3.80389	5.99061	0.634976	0.525444	NA
WBGene00199135	25763	E01G6.4	0.598145	-3.80389	5.99061	0.634975	0.525444	NA
WBGene00166862	24583	21ur-7559	0.830304	-3.80389	5.99061	0.634975	0.525444	NA
WBGene00167776	35919	21ur-11377	0.529681	-3.80389	5.99061	0.634975	0.525445	NA
WBGene00019851	23860	oac-41	0.593513	-3.80389	5.99061	0.634975	0.525445	NA
WBGene00012133	23508	T28F3.7	0.731583	-3.80389	5.99061	0.634975	0.525445	NA
WBGene00020982	15300	ilys-6	0.521341	-3.80382	5.83454	0.651949	0.514434	NA
WBGene00011902	21096	T21E8.4	1.06821	-3.80378	5.74645	0.661935	0.508013	NA
WBGene00171810	24808	21ur-6765	0.589643	-3.80375	5.68723	0.668822	0.503609	NA
WBGene00015771	27720	got-1.3	0.590176	-3.80373	5.65115	0.67309	0.50089	NA
WBGene00012614	23526	Y38H6A.3	0.758607	-3.80356	5.35509	0.71027	0.477537	NA
WBGene00014702	27608	C43D7.3	0.723842	-3.80352	5.29243	0.718673	0.472343	NA
WBGene00196681	25314	M03F4.10	0.778802	-3.80352	5.28221	0.720062	0.471487	NA
WBGene00019085	23836	F59A6.3	0.759819	-3.80351	5.27315	0.721296	0.470727	NA
WBGene00021724	27933	Y49F6C.2	0.774981	-3.80348	5.23657	0.726331	0.467636	NA
WBGene00005210	13545	srg-53	1.25238	-3.8032	4.86907	0.781094	0.434747	NA
WBGene00169565	24706	21ur-10180	0.992193	-3.80312	4.78568	0.794687	0.426795	NA
WBGene00003289	26502	mir-61	0.739027	-3.80286	4.5237	0.840653	0.400542	NA
WBGene00268215	12962	C49F5.13	0.770574	-3.80274	4.41675	0.860982	0.389248	NA
WBGene00005842	21516	srw-95	1.14611	-3.80265	4.35017	0.874137	0.382043	NA
WBGene00005118	15031	srd-40	1.04625	-3.80231	4.10423	0.926436	0.35422	NA
WBGene00201456	21422	Y65B4BR.10	1.14977	-3.80221	4.04208	0.940656	0.346881	NA
WBGene00268207	22951	W08F4.20	1.46882	-3.80217	4.01816	0.946247	0.344023	NA
WBGene00009214	19080	thn-3	1.1654	-3.80181	3.8239	0.994225	0.320113	NA
WBGene00021615	23930	Y47C4A.1	1.16572	-3.80148	3.66898	1.03611	0.300149	NA
WBGene00077495	33386	Y20C6A.4	1.69069	-3.80119	3.54921	1.07099	0.284172	NA
WBGene00022551	20132	ZC196.8	1.41249	-3.80034	3.26957	1.16234	0.245098	NA
WBGene00016692	21159	srbc-24	2.26824	-3.79927	3.01033	1.26208	0.206921	NA
WBGene00012400	9210	Y6E2A.7	2.56214	-3.79834	2.83727	1.33873	0.180659	NA
WBGene00020584	15286	T19D12.10	5.07746	-3.79595	2.52884	1.50106	0.133339	0.338636
WBGene00050889	11896	T04C12.9	1.83587	-3.79522	2.45838	1.54379	0.12264	NA
WBGene00009467	21071	F36D1.8	2.95128	-3.79436	2.3868	1.58973	0.111896	NA
WBGene00199670	19909	C10G11.14	1.16738	-3.7924	3.43622	1.10365	0.269743	NA
WBGene00044379	24071	F40H7.12	872.296	-3.78927	0.199017	19.0399	7.97284e-81	1.41677e-77
WBGene00219873	46550	EEED8.19	0.29419	-3.78303	5.99122	0.631429	0.52776	NA
WBGene00171780	24805	21ur-9703	0.601923	-3.78303	5.99122	0.631429	0.52776	NA
WBGene00168457	16234	21ur-11631	0.594846	-3.78292	5.54774	0.681886	0.495311	NA
WBGene00172577	40130	21ur-7128	0.773564	-3.78207	3.93559	0.96099	0.336557	NA
WBGene00196691	11430	M02D8.10	1.10379	-3.78187	3.75049	1.00837	0.313278	NA
WBGene00195623	11927	Y54G2A.58	1.19341	-3.78164	3.56043	1.06213	0.288175	NA
WBGene00020238	8852	T05B4.4	1.29834	-3.78066	3.02438	1.25006	0.211278	NA
WBGene00008071	20500	fbxb-64	1.76298	-3.77956	2.67811	1.41128	0.158162	NA
WBGene00010764	12136	K10H10.9	0.569747	-3.7619	5.4926	0.684902	0.493406	NA
WBGene00015066	23677	B0228.9	0.816555	-3.76189	4.96588	0.757549	0.448721	NA
WBGene00011686	27194	T10C6.2	0.243805	-3.76189	5.99186	0.627834	0.530112	NA
WBGene00015528	27708	C06E2.2	0.243805	-3.76189	5.99186	0.627834	0.530112	NA
WBGene00023249	28190	C35B1.t1	0.243805	-3.76189	5.99186	0.627834	0.530112	NA
WBGene00046036	28975	21ur-4419	0.243805	-3.76189	5.99186	0.627834	0.530112	NA
WBGene00172784	21318	21ur-7760	0.243805	-3.76189	5.99186	0.627834	0.530112	NA
WBGene00196306	42909	C54H2.6	0.243805	-3.76189	5.99186	0.627834	0.530112	NA
WBGene00006241	23265	str-208	0.502464	-3.76189	5.99186	0.627834	0.530112	NA
WBGene00044136	28310	F23D12.8	0.313557	-3.76189	5.99186	0.627834	0.530113	NA
WBGene00023300	20625	F56F11.t1	0.293326	-3.76189	5.99186	0.627834	0.530113	NA
WBGene00022637	27952	nhr-252	0.341497	-3.76189	5.99186	0.627834	0.530113	NA
WBGene00197360	25434	F46H6.8	0.353795	-3.76189	5.99186	0.627834	0.530113	NA
WBGene00167510	35675	21ur-12161	0.35793	-3.76189	5.99186	0.627834	0.530113	NA
WBGene00195817	16288	K10C3.7	0.488036	-3.76189	5.99186	0.627834	0.530113	NA
WBGene00017662	27796	F21D12.2	0.624159	-3.76189	5.99186	0.627834	0.530113	NA
WBGene00012633	22647	Y38H6C.21	0.610682	-3.76189	5.99186	0.627834	0.530113	NA
WBGene00017516	23778	F16G10.1	0.620505	-3.76189	5.99186	0.627834	0.530113	NA
WBGene00006021	23229	srx-130	0.549199	-3.76189	5.99186	0.627834	0.530113	NA
WBGene00013389	17647	Y62H9A.1	0.95249	-3.76189	4.74509	0.792796	0.427897	NA
WBGene00015065	20078	B0228.8	0.814614	-3.76189	5.05186	0.744654	0.456481	NA
WBGene00219798	10968	C04F12.17	0.49665	-3.76189	4.9096	0.766232	0.443538	NA
WBGene00198624	11942	F58G11.9	0.339326	-3.76189	5.99186	0.627834	0.530113	NA
WBGene00202343	26350	F39D8.7	0.623711	-3.76189	4.62352	0.813642	0.41585	NA
WBGene00169065	24672	21ur-6595	0.618539	-3.76189	4.59588	0.818535	0.413052	NA
WBGene00195459	20745	F27D4.9	0.639077	-3.76189	4.59078	0.819444	0.412533	NA
WBGene00005967	23215	srx-76	1.0067	-3.76189	4.92113	0.764437	0.444607	NA
WBGene00219936	26852	F37A8.7	0.5219	-3.76189	5.99186	0.627834	0.530113	NA
WBGene00195901	42683	H06I04.10	0.705764	-3.76189	5.99186	0.627834	0.530113	NA
WBGene00023499	28282	srz-63	0.414949	-3.76189	5.99186	0.627834	0.530113	NA
WBGene00006268	16528	str-240	0.710035	-3.76189	5.99185	0.627833	0.530113	NA
WBGene00013972	23580	scl-20	1.09813	-3.76189	4.38907	0.857103	0.391388	NA
WBGene00008327	17071	srz-44	0.989279	-3.76188	4.10718	0.915927	0.359705	NA
WBGene00010217	10145	sre-31	0.91948	-3.76188	4.12357	0.912286	0.361618	NA
WBGene00016821	12238	scl-26	1.21327	-3.76186	3.72138	1.01088	0.312076	NA
WBGene00023462	22833	srz-83	0.840594	-3.76185	3.67906	1.0225	0.306543	NA
WBGene00005197	20480	srg-40	1.42275	-3.76184	3.46275	1.08637	0.277314	NA
WBGene00018545	23426	nhr-189	1.48289	-3.76184	3.45472	1.0889	0.276198	NA
WBGene00017014	14239	dylt-2	2.12254	-3.7618	3.03493	1.2395	0.21516	NA
WBGene00005164	11560	srg-6	1.50371	-3.76178	2.93316	1.2825	0.199667	NA
WBGene00019625	11300	K10C9.4	2.62623	-3.76176	2.83675	1.32608	0.184813	NA
WBGene00219665	19934	linc-101	1.88636	-3.76167	2.46051	1.52882	0.12631	NA
WBGene00005331	15526	srh-112	2.69159	-3.76145	2.04143	1.84256	0.0653931	NA
WBGene00019527	19267	K08D9.6	6.70734	-3.76145	2.03204	1.85106	0.0641602	0.218373
WBGene00020793	21751	T25D1.1	5.81018	-3.7563	1.37189	2.73805	0.00618043	0.0424367
WBGene00197724	4472	F36H1.15	2.94795	-3.74626	2.23409	1.67686	0.09357	NA
WBGene00195485	12414	F55A12.11	0.528605	-3.74083	4.87489	0.767366	0.442864	NA
WBGene00201065	18927	C34D10.4	0.669295	-3.74045	5.99251	0.624188	0.532504	NA
WBGene00202218	14441	M60.14	0.240095	-3.74045	5.99251	0.624188	0.532504	NA
WBGene00049874	32422	21ur-3851	0.435947	-3.74045	5.99251	0.624188	0.532504	NA
WBGene00045144	28445	Y64G10A.10	0.525837	-3.74045	5.9925	0.624188	0.532504	NA
WBGene00219577	22437	linc-119	0.675733	-3.74045	5.9925	0.624188	0.532504	NA
WBGene00011716	23487	T11F9.19	2.05574	-3.72617	2.62086	1.42174	0.155103	NA
WBGene00005136	17020	srd-59	2.28315	-3.72486	2.79486	1.33275	0.182614	NA
WBGene00012415	16614	Y7A5A.9	1.67992	-3.72268	3.22381	1.15474	0.248195	NA
WBGene00013939	23574	ZK218.5	1.33855	-3.72078	3.91519	0.950345	0.341937	NA
WBGene00008279	22049	C53C7.3	1.66885	-3.72076	3.92637	0.947635	0.343315	NA
WBGene00017415	7816	F13A2.6	1.20486	-3.72037	4.15241	0.895954	0.370277	NA
WBGene00008474	21556	nhr-174	0.887986	-3.72011	4.32343	0.860454	0.389539	NA
WBGene00201279	14941	C44C10.14	0.97245	-3.72007	4.35343	0.854515	0.39282	NA
WBGene00000701	7999	col-127	0.764245	-3.71994	4.45321	0.835339	0.403527	NA
WBGene00010298	20043	F59A1.12	1.29075	-3.71988	4.49452	0.827649	0.40787	NA
WBGene00021291	23914	clec-121	0.949605	-3.71951	4.84747	0.767308	0.442898	NA
WBGene00170508	20246	21ur-13416	0.846807	-3.7194	4.95971	0.749923	0.453301	NA
WBGene00006085	16523	str-18	1.04171	-3.71936	4.99746	0.744251	0.456725	NA
WBGene00195671	22894	R186.9	0.94767	-3.71927	5.11002	0.727839	0.466712	NA
WBGene00018254	19730	F40H6.2	0.731258	-3.71917	5.24701	0.708817	0.478438	NA
WBGene00005596	23134	srj-8	0.724132	-3.71907	5.38179	0.691047	0.489536	NA
WBGene00197892	16343	Y39B6A.78	0.955977	-3.71873	5.96074	0.62387	0.532713	NA
WBGene00005732	26741	srv-21	0.515392	-3.71871	5.99318	0.620491	0.534935	NA
WBGene00255577	46799	mir-8205	0.515392	-3.71871	5.99318	0.620491	0.534935	NA
WBGene00189932	25001	Y26G10.7	0.632755	-3.71871	5.99318	0.620491	0.534935	NA
WBGene00021728	23934	Y49F6C.6	0.657934	-3.71871	5.99318	0.620491	0.534935	NA
WBGene00168382	36468	21ur-15081	0.305419	-3.71871	5.99318	0.620491	0.534935	NA
WBGene00077721	33441	mir-1022	0.285905	-3.71871	5.99318	0.620491	0.534935	NA
WBGene00173223	40700	21ur-11563	0.29004	-3.71871	5.99318	0.620491	0.534935	NA
WBGene00174380	24959	21ur-9307	0.29004	-3.71871	5.99318	0.620491	0.534935	NA
WBGene00199784	25894	F08G5.16	0.520759	-3.71871	5.99318	0.620491	0.534935	NA
WBGene00005449	16512	srh-243	0.236384	-3.71871	5.99318	0.620491	0.534935	NA
WBGene00016042	23717	C24A11.5	0.236384	-3.71871	5.99318	0.620491	0.534935	NA
WBGene00017655	23785	F21C10.5	0.236384	-3.71871	5.99318	0.620491	0.534935	NA
WBGene00022711	14819	irld-63	0.236384	-3.71871	5.99318	0.620491	0.534935	NA
WBGene00165418	33831	21ur-8278	0.236384	-3.71871	5.99318	0.620491	0.534935	NA
WBGene00171001	38757	21ur-8661	0.236384	-3.71871	5.99318	0.620491	0.534935	NA
WBGene00171526	39219	21ur-7583	0.236384	-3.71871	5.99318	0.620491	0.534935	NA
WBGene00174051	41420	21ur-12585	0.236384	-3.71871	5.99318	0.620491	0.534935	NA
WBGene00195514	42470	Y73A3A.1	0.236384	-3.71871	5.99318	0.620491	0.534935	NA
WBGene00195733	42596	T28B11.3	0.236384	-3.71871	5.99318	0.620491	0.534935	NA
WBGene00197339	20344	Y51A2D.28	0.236384	-3.71871	5.99318	0.620491	0.534935	NA
WBGene00198358	25623	F02E8.8	0.236384	-3.71871	5.99318	0.620491	0.534935	NA
WBGene00200987	45550	F46A9.10	0.236384	-3.71871	5.99318	0.620491	0.534935	NA
WBGene00201403	45778	LLC1.120	0.236384	-3.71871	5.99318	0.620491	0.534935	NA
WBGene00202437	46373	Y15E3A.16	0.236384	-3.71871	5.99318	0.620491	0.534935	NA
WBGene00269338	20457	R07C3.16	0.236384	-3.71871	5.99318	0.620491	0.534935	NA
WBGene00016820	22719	C50E3.9	0.334077	-3.71871	5.99318	0.620491	0.534935	NA
WBGene00017505	27785	F16B4.3	0.334077	-3.71871	5.99318	0.620491	0.534935	NA
WBGene00012571	23523	Y37H2A.11	0.343696	-3.71871	5.99318	0.620491	0.534935	NA
WBGene00168363	36452	21ur-8395	0.343696	-3.71871	5.99318	0.620491	0.534935	NA
WBGene00195508	25089	C11E4.9	0.343696	-3.71871	5.99318	0.620491	0.534935	NA
WBGene00200861	45483	F28A12.6	0.343696	-3.71871	5.99318	0.620491	0.534935	NA
WBGene00046020	28961	21ur-3185	0.365928	-3.71871	5.99318	0.620491	0.534935	NA
WBGene00077436	22376	F46B3.22	0.365928	-3.71871	5.99318	0.620491	0.534935	NA
WBGene00006024	23230	srx-133	0.43457	-3.71871	5.99318	0.620491	0.534935	NA
WBGene00006202	26988	str-156	0.725984	-3.71871	5.99318	0.620491	0.534935	NA
WBGene00017668	22736	ins-39	0.532904	-3.71871	5.99318	0.620491	0.534935	NA
WBGene00022341	27945	Y82E9BR.8	0.577792	-3.71871	5.99318	0.620491	0.534935	NA
WBGene00169990	37871	21ur-12928	0.669637	-3.71871	5.99318	0.620491	0.534935	NA
WBGene00013503	23558	clec-112	0.65007	-3.71871	5.99318	0.620491	0.534935	NA
WBGene00019930	23864	fbxc-35	0.657595	-3.71871	5.99318	0.620491	0.534935	NA
WBGene00015170	23681	B0410.1	0.321956	-3.71871	5.99317	0.62049	0.534935	NA
WBGene00199524	44714	C55B6.6	0.444647	-3.71871	5.99317	0.62049	0.534935	NA
WBGene00008898	23338	F16H6.8	0.624652	-3.71871	5.99317	0.62049	0.534935	NA
WBGene00006234	26995	str-198	0.428776	-3.71871	5.99317	0.62049	0.534935	NA
WBGene00018558	12773	srt-20	0.638032	-3.71871	5.99317	0.62049	0.534935	NA
WBGene00048795	31443	21ur-168	0.407528	-3.71871	5.99317	0.62049	0.534935	NA
WBGene00166302	34594	21ur-8650	0.825928	-3.71871	5.99317	0.62049	0.534935	NA
WBGene00196235	42869	W10C8.8	0.516435	-3.7187	5.99317	0.62049	0.534935	NA
WBGene00011516	27178	T06C12.9	1.86802	-3.69258	3.93714	0.937884	0.348304	NA
WBGene00170521	11906	21ur-9523	2.09625	-3.68106	2.25654	1.63128	0.10283	NA
WBGene00197301	43452	Y58A7A.9	3.19843	-3.67834	2.11113	1.74235	0.0814471	0.25164
WBGene00020328	10819	clec-20	1.24321	-3.67634	3.86864	0.950292	0.341964	NA
WBGene00012591	11179	nspe-1	848.832	-3.66798	0.359423	10.2052	1.87911e-24	2.82981e-22
WBGene00044972	28387	F35E12.11	0.947873	-3.65239	4.77778	0.764455	0.444596	NA
WBGene00044719	14360	clec-172	36.468	-3.64747	1.15716	3.15209	0.00162105	0.0145192
WBGene00013172	23545	Y53F4B.26	0.844163	-3.64367	4.78777	0.761037	0.446635	NA
WBGene00010754	15621	K10G4.5	18.1527	-3.64349	1.09904	3.31515	0.000915946	0.00901238
WBGene00019469	23852	srz-89	1.34132	-3.6263	5.03751	0.719859	0.471612	NA
WBGene00015838	22698	math-9	2.17595	-3.61127	3.16285	1.14178	0.253547	NA
WBGene00044897	12377	M01D7.9	3.97027	-3.59087	2.30352	1.55886	0.119028	0.31659
WBGene00045082	14844	F46F11.12	3.17873	-3.58387	1.96736	1.82167	0.0685058	NA
WBGene00010832	17605	M02G9.3	17.9177	-3.57749	0.760009	4.70716	2.51189e-06	4.8997e-05
WBGene00000989	2018	dhs-26	280.771	-3.55505	0.328367	10.8265	2.57908e-27	4.62932e-25
WBGene00201143	21419	F43C9.8	1.0602	-3.53022	3.97538	0.88802	0.37453	NA
WBGene00020546	14303	zig-13	7.46716	-3.52987	1.2255	2.88035	0.00397233	0.0298093
WBGene00194928	4467	ZC513.14	8.57754	-3.50668	1.70522	2.05644	0.03974	0.160587
WBGene00195363	18381	M01H9.6	3.32535	-3.50622	2.02958	1.72756	0.0840669	0.256723
WBGene00197714	9452	Y54E10BL.8	2.43871	-3.49454	2.37653	1.47044	0.141443	NA
WBGene00166467	34738	21ur-10556	1.16596	-3.49083	3.38731	1.03056	0.302747	NA
WBGene00000551	22468	clx-1	10.1513	-3.48411	3.08988	1.12759	0.259494	0.498133
WBGene00008009	19577	fbxa-171	1.95036	-3.46934	2.60622	1.33118	0.183131	NA
WBGene00012603	12175	nspe-6	55.5453	-3.45264	0.597886	5.77474	7.70699e-09	2.28255e-07
WBGene00005942	9585	srx-51	3.60021	-3.44915	1.67301	2.06165	0.0392413	0.159241
WBGene00018480	9324	otpl-7	30.3307	-3.44204	0.677347	5.08165	3.74178e-07	8.40664e-06
WBGene00021491	9880	comt-4	122.227	-3.43078	0.453041	7.57279	3.65283e-14	1.98504e-12
WBGene00219314	22434	C05B5.17	3.70783	-3.40756	1.97723	1.7234	0.0848155	0.257945
WBGene00021052	904	W06A11.1	250.155	-3.38901	0.350956	9.65651	4.61311e-22	5.65344e-20
WBGene00048542	31223	21ur-4332	0.188419	-3.38845	6.00467	0.564302	0.572549	NA
WBGene00048831	31477	21ur-1554	0.188419	-3.38845	6.00467	0.564302	0.572549	NA
WBGene00195414	25070	C33F10.16	0.188419	-3.38845	6.00467	0.564302	0.572549	NA
WBGene00220043	46633	R12C12.13	0.188419	-3.38845	6.00467	0.564302	0.572549	NA
WBGene00197252	25421	F41C6.10	0.286111	-3.38845	6.00467	0.564302	0.572549	NA
WBGene00166479	20226	21ur-9846	0.29573	-3.38845	6.00467	0.564302	0.572549	NA
WBGene00196781	43178	Y65B4BL.10	0.397675	-3.38845	6.00467	0.564302	0.572549	NA
WBGene00171412	39117	21ur-8397	0.349386	-3.38845	6.00467	0.564302	0.572549	NA
WBGene00045983	24169	21ur-3771	0.451888	-3.38845	6.00467	0.564302	0.572549	NA
WBGene00195580	21335	R07D5.3	0.510353	-3.38845	6.00467	0.564302	0.572549	NA
WBGene00200889	26101	K03C7.13	0.510353	-3.38845	6.00467	0.564302	0.572549	NA
WBGene00045083	20169	C04G6.12	0.237265	-3.38845	6.00467	0.564302	0.572549	NA
WBGene00196354	25258	M79.8	0.237265	-3.38845	6.00467	0.564302	0.572549	NA
WBGene00172815	21319	21ur-9448	0.248888	-3.38845	6.00467	0.564302	0.572549	NA
WBGene00047542	24256	21ur-3095	0.306846	-3.38845	6.00467	0.564302	0.572549	NA
WBGene00005181	26604	srg-24	0.364765	-3.38845	6.00467	0.564302	0.572549	NA
WBGene00048235	21820	21ur-918	0.364765	-3.38845	6.00467	0.564302	0.572549	NA
WBGene00196024	16297	C32C4.9	0.478408	-3.38845	6.00467	0.564302	0.572549	NA
WBGene00005244	17022	srh-19	0.617912	-3.38845	6.00467	0.564302	0.572549	NA
WBGene00169920	37809	21ur-6617	0.235094	-3.38845	6.00467	0.564302	0.572549	NA
WBGene00165081	33530	21ur-8247	0.299866	-3.38845	6.00467	0.564302	0.572549	NA
WBGene00168559	36622	21ur-13141	0.342406	-3.38845	6.00467	0.564302	0.572549	NA
WBGene00022972	28009	D1009.t2	0.42803	-3.38845	6.00467	0.564302	0.572549	NA
WBGene00020127	19760	R193.1	0.281769	-3.38844	6.00467	0.564302	0.572549	NA
WBGene00202322	16438	T23G5.11	0.563675	-3.38844	6.00467	0.564302	0.572549	NA
WBGene00166738	24575	21ur-7658	0.518222	-3.38844	6.00467	0.564302	0.572549	NA
WBGene00169595	24708	21ur-14036	0.328445	-3.38844	6.00467	0.564302	0.572549	NA
WBGene00174023	41396	21ur-15670	0.673534	-3.38844	6.00467	0.564301	0.572549	NA
WBGene00022083	2427	Y69A2AR.12	156.258	-3.38842	0.284102	11.9268	8.58105e-33	2.14768e-30
WBGene00197258	20340	C54G4.11	0.479954	-3.38841	5.94158	0.570288	0.568482	NA
WBGene00173776	24932	21ur-6808	0.521508	-3.38835	5.85229	0.578979	0.562603	NA
WBGene00012214	27224	W02D9.8	1.90615	-3.38793	5.28024	0.641625	0.521117	NA
WBGene00201953	20906	K06A5.10	1.1542	-3.38756	4.90237	0.691004	0.489563	NA
WBGene00171450	39151	21ur-14512	1.16857	-3.38745	4.81772	0.703124	0.481979	NA
WBGene00202479	20434	R05F9.15	1.03941	-3.38671	4.30288	0.78708	0.431235	NA
WBGene00196071	13911	F56F3.8	1.67958	-3.38662	4.24915	0.797011	0.425445	NA
WBGene00200397	16393	ZK632.17	1.49976	-3.38617	3.79047	0.893337	0.371677	NA
WBGene00005588	22010	sri-76	1.13101	-3.38561	3.78961	0.893392	0.371647	NA
WBGene00195803	19873	F46E10.13	0.982898	-3.3848	3.52679	0.959741	0.337186	NA
WBGene00165575	18349	21ur-7394	1.287	-3.38407	3.33565	1.01452	0.310335	NA
WBGene00220172	15957	Y49E10.36	0.906698	-3.384	3.31794	1.01991	0.307771	NA
WBGene00168884	22869	21ur-11141	1.112	-3.38306	3.12153	1.08378	0.278462	NA
WBGene00170354	8931	21ur-14926	2.02017	-3.38173	2.90649	1.16351	0.244623	NA
WBGene00194713	15400	F19B10.13	111.136	-3.38027	0.310199	10.8971	1.19009e-27	2.18019e-25
WBGene00005311	15525	srh-90	3.03563	-3.37944	2.63719	1.28145	0.200035	NA
WBGene00009786	14112	F46F2.1	5.59973	-3.37201	1.66873	2.02071	0.0433101	0.16993
WBGene00006083	21519	str-15	0.540617	-3.37052	5.96565	0.564987	0.572083	NA
WBGene00013007	8716	Y48E1B.8	308.212	-3.3642	0.362534	9.27969	1.69971e-20	1.74589e-18
WBGene00197040	25386	ZC477.17	0.184709	-3.36084	6.00575	0.559603	0.57575	NA
WBGene00172103	24828	21ur-7664	0.233555	-3.36084	6.00575	0.559603	0.57575	NA
WBGene00201321	16412	F53B1.15	0.374886	-3.36084	6.00575	0.559603	0.57575	NA
WBGene00201679	20898	R02D5.22	0.332969	-3.36084	6.00575	0.559603	0.57575	NA
WBGene00201021	45568	Y47D3B.22	0.382792	-3.36084	6.00575	0.559603	0.57575	NA
WBGene00201591	16918	F18A11.12	0.333886	-3.36084	6.00575	0.559603	0.57575	NA
WBGene00045959	24166	21ur-4442	0.4333	-3.36084	6.00575	0.559603	0.57575	NA
WBGene00196914	25359	R07E4.9	0.434217	-3.36084	6.00575	0.559603	0.575751	NA
WBGene00196579	21346	C06G1.8	0.586497	-3.36071	5.46075	0.61543	0.538271	NA
WBGene00200504	26024	T21H8.9	0.67421	-3.3607	5.43632	0.618194	0.536447	NA
WBGene00199304	22421	C07G1.12	0.626352	-3.36045	4.72479	0.711237	0.476937	NA
WBGene00048062	30802	21ur-2670	0.681076	-3.35996	3.94524	0.85165	0.394408	NA
WBGene00170795	16811	21ur-6717	0.700987	-3.35938	3.41753	0.982985	0.325615	NA
WBGene00044964	28381	F22D6.16	0.669567	-3.35908	3.21871	1.04361	0.296666	NA
WBGene00202056	46158	R03A10.14	0.950643	-3.35904	3.19822	1.05028	0.293587	NA
WBGene00005200	11050	srg-43	2.13599	-3.34425	2.66766	1.25363	0.209978	NA
WBGene00021160	908	gba-4	1298.98	-3.34029	0.575928	5.79984	6.63799e-09	1.98581e-07
WBGene00195208	8940	W02H3.3	1.07988	-3.33457	3.07202	1.08546	0.277716	NA
WBGene00005160	12541	srg-2	1.16003	-3.33442	3.15731	1.0561	0.290925	NA
WBGene00005362	15528	srh-146	1.32925	-3.334	3.4667	0.961721	0.33619	NA
WBGene00200101	17404	R06C1.11	0.805191	-3.3337	3.75646	0.887458	0.374833	NA
WBGene00000432	17967	ceh-7	1.14032	-3.33364	3.82203	0.872217	0.38309	NA
WBGene00196910	43242	H14A12.8	0.62581	-3.33346	4.06931	0.819172	0.412688	NA
WBGene00202101	26310	Y39A3CR.10	0.685562	-3.3332	4.52462	0.736681	0.461316	NA
WBGene00023386	21243	Y67D2.t2	0.560216	-3.33309	4.76088	0.700101	0.483864	NA
WBGene00200391	26004	C40H1.11	0.69776	-3.33295	5.17536	0.644003	0.519574	NA
WBGene00202243	21434	C14H10.6	0.686344	-3.3329	5.32089	0.62638	0.531066	NA
WBGene00022216	27938	fbxa-16	0.641237	-3.33285	5.50395	0.605538	0.544821	NA
WBGene00014976	22177	Y116A8C.7	3.43998	-3.33284	1.63814	2.03453	0.0418982	0.16645
WBGene00219871	46549	E01A2.11	0.486091	-3.33275	5.93598	0.561449	0.574492	NA
WBGene00050069	32602	21ur-3451	0.2835	-3.33273	6.00688	0.554819	0.579018	NA
WBGene00197075	25396	C01F6.12	0.320503	-3.33273	6.00688	0.554819	0.579018	NA
WBGene00172832	40350	21ur-15372	0.367914	-3.33273	6.00688	0.554819	0.579018	NA
WBGene00045112	28428	K12D12.8	0.41439	-3.33273	6.00688	0.554819	0.579018	NA
WBGene00219840	26836	C29F9.15	0.448611	-3.33273	6.00688	0.554819	0.579018	NA
WBGene00005808	23177	srw-61	0.180999	-3.33273	6.00688	0.554819	0.579018	NA
WBGene00044307	28322	F58F9.9	0.180999	-3.33273	6.00688	0.554819	0.579018	NA
WBGene00050031	32569	21ur-2615	0.180999	-3.33273	6.00688	0.554819	0.579018	NA
WBGene00168737	21300	21ur-11546	0.180999	-3.33273	6.00688	0.554819	0.579018	NA
WBGene00199432	44663	R06C1.10	0.180999	-3.33273	6.00688	0.554819	0.579018	NA
WBGene00235160	46754	CD4.18	0.180999	-3.33273	6.00688	0.554819	0.579018	NA
WBGene00219934	20443	F35F11.4	0.379022	-3.33273	6.00688	0.554819	0.579018	NA
WBGene00011991	20054	T24D5.3	0.388758	-3.33273	6.00688	0.554819	0.579018	NA
WBGene00198652	25670	F25H8.12	0.372041	-3.33273	6.00688	0.554819	0.579018	NA
WBGene00000859	22964	cwp-1	0.688558	-3.33273	6.00688	0.554819	0.579018	NA
WBGene00009487	12107	clec-232	100.916	-3.32537	0.315662	10.5346	5.98431e-26	9.93843e-24
WBGene00007962	8612	C35D6.5	5.32652	-3.32407	2.05093	1.62076	0.105069	0.292567
WBGene00189979	10920	W04A8.8	2.67721	-3.32255	1.89937	1.74928	0.0802418	NA
WBGene00171479	12404	21ur-9213	3.16383	-3.31948	1.99503	1.66387	0.0961377	NA
WBGene00015491	19192	C05E4.12	2.70073	-3.31734	2.07738	1.59689	0.11029	NA
WBGene00021746	22324	Y50D4B.7	3.73771	-3.31717	2.08382	1.59187	0.111413	0.303188
WBGene00008866	15092	F15G9.2	1.75233	-3.30803	3.5142	0.941333	0.346534	NA
WBGene00199323	483	C08D8.5	1.33512	-3.30688	3.89096	0.849889	0.395387	NA
WBGene00005415	15997	srh-204	0.84564	-3.30621	4.18915	0.789231	0.429977	NA
WBGene00200606	10952	Y37E3.29	1.54658	-3.30563	4.50891	0.733134	0.463477	NA
WBGene00171069	24770	21ur-7907	0.666472	-3.30557	4.55199	0.726181	0.467728	NA
WBGene00047270	15864	21ur-2736	0.83587	-3.30554	4.5714	0.723092	0.469623	NA
WBGene00077510	33389	Y42A5A.6	0.226809	-3.30412	6.00805	0.549948	0.582355	NA
WBGene00197903	25529	T28B4.10	0.230944	-3.30412	6.00805	0.549948	0.582355	NA
WBGene00219939	46579	F38H4.16	0.24206	-3.30412	6.00805	0.549948	0.582355	NA
WBGene00172654	5462	21ur-15386	0.325548	-3.30412	6.00805	0.549948	0.582355	NA
WBGene00197661	21365	R12B2.9	0.347992	-3.30412	6.00805	0.549948	0.582355	NA
WBGene00219606	15449	linc-133	0.478245	-3.30412	6.00805	0.549948	0.582355	NA
WBGene00006117	16020	str-52	0.177288	-3.30412	6.00805	0.549948	0.582355	NA
WBGene00009828	21078	F47G4.8	0.177288	-3.30412	6.00805	0.549948	0.582355	NA
WBGene00023333	28227	R148.t3	0.177288	-3.30412	6.00805	0.549948	0.582355	NA
WBGene00050814	33273	21ur-2986	0.177288	-3.30412	6.00805	0.549948	0.582355	NA
WBGene00168605	36664	21ur-5893	0.177288	-3.30412	6.00805	0.549948	0.582355	NA
WBGene00195292	42360	Y47D3B.13	0.177288	-3.30412	6.00805	0.549948	0.582355	NA
WBGene00197522	43586	T21B6.10	0.177288	-3.30412	6.00805	0.549948	0.582355	NA
WBGene00197834	25516	T16G1.15	0.177288	-3.30412	6.00805	0.549948	0.582355	NA
WBGene00201334	45741	T10A3.5	0.177288	-3.30412	6.00805	0.549948	0.582355	NA
WBGene00198848	44336	B0205.16	0.316792	-3.30412	6.00805	0.549948	0.582355	NA
WBGene00195888	14403	K07A12.9	0.304073	-3.30412	6.00805	0.549948	0.582355	NA
WBGene00047350	24250	21ur-3962	0.2846	-3.30412	6.00805	0.549948	0.582355	NA
WBGene00200553	45304	C02B10.74	0.2846	-3.30412	6.00805	0.549948	0.582355	NA
WBGene00202355	14947	M176.15	0.375371	-3.30412	6.00805	0.549948	0.582355	NA
WBGene00199434	21395	C17H12.34	0.382292	-3.30412	6.00805	0.549948	0.582355	NA
WBGene00009955	23376	eak-4	0.479984	-3.30412	6.00805	0.549948	0.582355	NA
WBGene00005863	26781	srw-116	0.404524	-3.30412	6.00805	0.549948	0.582355	NA
WBGene00219906	26844	F19G12.14	0.223964	-3.30411	6.00805	0.549948	0.582355	NA
WBGene00200725	13937	Y39A3CL.14	0.277619	-3.30411	6.00805	0.549948	0.582355	NA
WBGene00197486	25460	R151.15	0.331275	-3.30411	6.00805	0.549948	0.582355	NA
WBGene00173429	40880	21ur-12267	0.412988	-3.30411	6.00805	0.549948	0.582355	NA
WBGene00219574	15944	linc-54	0.368331	-3.30411	6.00805	0.549948	0.582355	NA
WBGene00197378	7952	T22A3.11	0.52984	-3.30411	6.00805	0.549948	0.582355	NA
WBGene00197604	17382	K01G5.12	0.463522	-3.30411	6.00805	0.549948	0.582355	NA
WBGene00219929	26848	F32B4.12	0.680233	-3.30411	6.00805	0.549948	0.582355	NA
WBGene00195211	17361	C34F6.12	1.22025	-3.30159	3.15536	1.04635	0.295402	NA
WBGene00006925	634	vit-1	272407	-3.27909	0.449431	7.29608	2.96267e-13	1.4747e-11
WBGene00000483	16973	che-1	2.17598	-3.27205	2.35385	1.39009	0.164502	NA
WBGene00012816	21111	scl-21	2.83497	-3.2611	1.81233	1.7994	0.0719556	NA
WBGene00255597	21453	pals-21	14.0139	-3.23801	1.30813	2.47529	0.0133128	0.0743224
WBGene00220134	26883	Y17G7B.25	3.59971	-3.23732	1.98402	1.6317	0.102743	0.289059
WBGene00023277	21241	F29C4.3	4.11871	-3.22683	2.10167	1.53536	0.124695	0.325378
WBGene00020009	22290	R11F4.3	720.981	-3.20783	0.194633	16.4814	4.99029e-61	4.03079e-58
WBGene00005912	12552	srx-21	3.64708	-3.20207	2.05695	1.55671	0.119539	0.317523
WBGene00016670	11754	ilys-3	10.6779	-3.19267	1.15093	2.774	0.00553713	0.0388452
WBGene00194888	8451	K10H10.13	1.75933	-3.19253	2.61289	1.22184	0.221768	NA
WBGene00009628	3181	tatn-1	3675.09	-3.18555	0.277522	11.4786	1.69077e-30	3.5347e-28
WBGene00206500	21439	F55C9.15	4.27788	-3.17401	2.06403	1.53778	0.124103	0.324359
WBGene00000521	19962	cky-1	5.7435	-3.16932	1.7804	1.78011	0.0750575	0.240103
WBGene00020961	13821	sknr-1	6.48532	-3.16791	1.61819	1.95768	0.0502671	0.187456
WBGene00049014	14852	21ur-1549	1.39725	-3.16646	2.9366	1.07827	0.280912	NA
WBGene00016268	12729	C30G4.2	4.63099	-3.15294	1.45288	2.17014	0.0299966	0.132729
WBGene00200296	25981	M79.13	0.564995	-3.15023	5.9692	0.527748	0.597674	NA
WBGene00174998	24993	21ur-6715	0.841387	-3.12525	5.92804	0.527197	0.598057	NA
WBGene00012586	23524	Y38E10A.8	1.29257	-3.12517	3.44825	0.906306	0.364774	NA
WBGene00220170	19448	Y48C3A.25	1.05983	-3.1231	3.92601	0.79549	0.426329	NA
WBGene00017501	5324	pud-3	5634.83	-3.11388	0.158376	19.6613	4.62318e-86	1.02692e-82
WBGene00198681	12432	W06A7.8	2.56823	-3.10571	1.96424	1.58112	0.11385	NA
WBGene00022189	17282	Y71H2AR.2	10.6765	-3.10555	1.16275	2.67086	0.00756572	0.0493368
WBGene00200176	9967	T19A5.11	1.20871	-3.10153	2.87094	1.08032	0.28	NA
WBGene00017116	10754	fbxb-78	13.397	-3.05922	1.09643	2.79016	0.00526819	0.0374313
WBGene00044955	16175	K07C11.11	1.40912	-3.05691	2.82907	1.08054	0.279902	NA
WBGene00000503	20964	cht-1	3476.45	-3.04945	0.193499	15.7595	5.9079e-56	3.88828e-53
WBGene00219239	20926	K05F6.14	2.13639	-3.03364	2.67848	1.1326	0.257384	NA
WBGene00077757	466	E02H4.7	359.888	-3.03098	0.330529	9.1701	4.72579e-20	4.71782e-18
WBGene00006276	27017	str-249	16.6289	-3.01753	0.764527	3.94692	7.9163e-05	0.00108712
WBGene00012065	19137	fbxb-2	18.7227	-3.0102	0.729401	4.12695	3.67611e-05	0.000558001
WBGene00016483	2309	C36C5.14	11.4537	-3.00834	0.910572	3.30379	0.000953874	0.00930634
WBGene00014883	18694	Y39C12A.2	37.3755	-3.00193	1.05265	2.85179	0.00434745	0.0320956
WBGene00009842	2685	igeg-2	227.597	-2.99959	0.31037	9.66455	4.2649e-22	5.263e-20
WBGene00044917	3463	F40F8.12	3.89707	-2.99919	1.72007	1.74365	0.0812207	0.25129
WBGene00008129	14092	C47A10.12	10.8766	-2.97365	1.54195	1.9285	0.0537935	0.195913
WBGene00017267	27778	numr-2	14.8396	-2.96373	0.751256	3.94503	7.97909e-05	0.00109332
WBGene00021303	909	Y32G9A.5	1.33768	-2.95915	3.55732	0.831849	0.405494	NA
WBGene00018741	7333	comt-1	4.56473	-2.95084	1.75306	1.68326	0.0923255	0.270998
WBGene00005386	12545	srh-170	0.940481	-2.94411	3.71777	0.791903	0.428417	NA
WBGene00045361	18329	clec-253	1.13255	-2.94302	3.45188	0.852585	0.393889	NA
WBGene00199301	15930	K02A4.8	1.41643	-2.9401	2.94848	0.997159	0.318687	NA
WBGene00010186	23388	nhr-283	3.70931	-2.93987	1.78714	1.64501	0.0999668	0.283998
WBGene00200150	22921	C07A9.16	1.87258	-2.93322	2.30815	1.27081	0.203797	NA
WBGene00012583	260	clec-4	781.048	-2.93253	0.257586	11.3847	4.9859e-30	1.03023e-27
WBGene00007423	12062	C08B6.2	117.621	-2.91517	0.382882	7.61375	2.66256e-14	1.47855e-12
WBGene00077725	21833	mir-1832.1	1.01179	-2.91442	3.10197	0.939536	0.347455	NA
WBGene00198446	12431	T25D10.6	1.31163	-2.91327	2.86185	1.01797	0.308694	NA
WBGene00019253	19264	H31G24.1	1.42759	-2.91139	2.55319	1.14029	0.254164	NA
WBGene00021609	27929	irld-17	1.88402	-2.91118	2.52362	1.15358	0.248674	NA
WBGene00194683	21327	T20G5.15	5.46911	-2.90833	1.50537	1.93197	0.0533626	0.195034
WBGene00199997	25931	H32C10.97	0.564841	-2.90506	5.97383	0.486298	0.626756	NA
WBGene00195412	13909	K03H1.16	0.712054	-2.90358	4.32509	0.671333	0.502009	NA
WBGene00220073	26875	T19E7.29	0.679172	-2.89037	5.97413	0.483815	0.628517	NA
WBGene00011264	23470	R13H4.6	1.16544	-2.88808	3.50471	0.824056	0.409908	NA
WBGene00023066	19802	F53F10.7	2.34443	-2.87638	2.22315	1.29383	0.195724	NA
WBGene00017060	19212	D2063.1	128.509	-2.87574	0.376427	7.63957	2.17945e-14	1.22949e-12
WBGene00044963	28380	K07C5.11	2.39716	-2.87021	2.08078	1.37939	0.167775	NA
WBGene00219837	17444	C28D4.17	3.12071	-2.86262	2.20842	1.29623	0.194897	NA
WBGene00021999	11347	thn-5	39.0516	-2.85665	0.523923	5.45243	4.96863e-08	1.29651e-06
WBGene00043059	17822	srab-26	2.01143	-2.83179	2.54439	1.11296	0.265727	NA
WBGene00015406	21667	C03H5.4	1.78339	-2.83019	2.63008	1.07609	0.281888	NA
WBGene00044961	19339	F56A12.5	0.665776	-2.8292	5.13126	0.551366	0.581383	NA
WBGene00008577	11614	F08G2.5	439.967	-2.82502	0.251273	11.2428	2.51239e-29	4.96057e-27
WBGene00201793	26249	E01H11.5	1.47072	-2.80714	3.5225	0.796916	0.4255	NA
WBGene00021002	5892	W03F9.4	127.882	-2.80318	0.405396	6.91466	4.68979e-12	2.06793e-10
WBGene00001738	22968	grl-29	0.125613	-2.80269	6.03271	0.464582	0.642231	NA
WBGene00001904	26462	his-30	0.125613	-2.80269	6.03271	0.464582	0.642231	NA
WBGene00003098	26477	lys-9	0.125613	-2.80269	6.03271	0.464582	0.642231	NA
WBGene00005233	16503	srh-7	0.125613	-2.80269	6.03271	0.464582	0.642231	NA
WBGene00005761	26747	srw-14	0.125613	-2.80269	6.03271	0.464582	0.642231	NA
WBGene00005768	23167	srw-21	0.125613	-2.80269	6.03271	0.464582	0.642231	NA
WBGene00005951	23212	srx-60	0.125613	-2.80269	6.03271	0.464582	0.642231	NA
WBGene00006966	27031	xtr-2	0.125613	-2.80269	6.03271	0.464582	0.642231	NA
WBGene00007889	17059	C33A12.16	0.125613	-2.80269	6.03271	0.464582	0.642231	NA
WBGene00008242	23312	ceh-75	0.125613	-2.80269	6.03271	0.464582	0.642231	NA
WBGene00008716	23331	F11F1.4	0.125613	-2.80269	6.03271	0.464582	0.642231	NA
WBGene00012051	23498	T26E4.9	0.125613	-2.80269	6.03271	0.464582	0.642231	NA
WBGene00012303	27228	W06D11.5	0.125613	-2.80269	6.03271	0.464582	0.642231	NA
WBGene00013937	27295	ZK218.3	0.125613	-2.80269	6.03271	0.464582	0.642231	NA
WBGene00014535	27507	T28D6.t1	0.125613	-2.80269	6.03271	0.464582	0.642231	NA
WBGene00014597	16642	Y65A5A.t2	0.125613	-2.80269	6.03271	0.464582	0.642231	NA
WBGene00014922	10709	Y57G11B.4	0.125613	-2.80269	6.03271	0.464582	0.642231	NA
WBGene00014971	27690	Y113G7A.t3	0.125613	-2.80269	6.03271	0.464582	0.642231	NA
WBGene00019470	23853	cyp-35B3	0.125613	-2.80269	6.03271	0.464582	0.642231	NA
WBGene00020922	23900	W01H2.2	0.125613	-2.80269	6.03271	0.464582	0.642231	NA
WBGene00021029	23902	W04D12.1	0.125613	-2.80269	6.03271	0.464582	0.642231	NA
WBGene00021612	23929	Y46H3D.8	0.125613	-2.80269	6.03271	0.464582	0.642231	NA
WBGene00022481	23952	srz-9	0.125613	-2.80269	6.03271	0.464582	0.642231	NA
WBGene00023368	28252	Y37F4.t1	0.125613	-2.80269	6.03271	0.464582	0.642231	NA
WBGene00023376	28258	Y53G8B.t4	0.125613	-2.80269	6.03271	0.464582	0.642231	NA
WBGene00043283	28290	F23B2.9	0.125613	-2.80269	6.03271	0.464582	0.642231	NA
WBGene00044096	28304	srh-96	0.125613	-2.80269	6.03271	0.464582	0.642231	NA
WBGene00044369	21793	irld-67	0.125613	-2.80269	6.03271	0.464582	0.642231	NA
WBGene00045022	24102	K04D7.7	0.125613	-2.80269	6.03271	0.464582	0.642231	NA
WBGene00047228	30053	21ur-4700	0.125613	-2.80269	6.03271	0.464582	0.642231	NA
WBGene00047634	30424	21ur-4408	0.125613	-2.80269	6.03271	0.464582	0.642231	NA
WBGene00047918	30670	21ur-3286	0.125613	-2.80269	6.03271	0.464582	0.642231	NA
WBGene00049731	32289	21ur-3547	0.125613	-2.80269	6.03271	0.464582	0.642231	NA
WBGene00050199	32719	21ur-4782	0.125613	-2.80269	6.03271	0.464582	0.642231	NA
WBGene00050379	32882	21ur-1679	0.125613	-2.80269	6.03271	0.464582	0.642231	NA
WBGene00050400	32899	21ur-104	0.125613	-2.80269	6.03271	0.464582	0.642231	NA
WBGene00050606	33086	21ur-363	0.125613	-2.80269	6.03271	0.464582	0.642231	NA
WBGene00165459	33865	21ur-14260	0.125613	-2.80269	6.03271	0.464582	0.642231	NA
WBGene00165773	34143	21ur-8942	0.125613	-2.80269	6.03271	0.464582	0.642231	NA
WBGene00168058	36172	21ur-12312	0.125613	-2.80269	6.03271	0.464582	0.642231	NA
WBGene00168066	36179	21ur-6237	0.125613	-2.80269	6.03271	0.464582	0.642231	NA
WBGene00168140	36247	21ur-5509	0.125613	-2.80269	6.03271	0.464582	0.642231	NA
WBGene00168795	36836	21ur-5712	0.125613	-2.80269	6.03271	0.464582	0.642231	NA
WBGene00169670	37590	21ur-8079	0.125613	-2.80269	6.03271	0.464582	0.642231	NA
WBGene00169754	37663	21ur-12240	0.125613	-2.80269	6.03271	0.464582	0.642231	NA
WBGene00169825	37728	21ur-8915	0.125613	-2.80269	6.03271	0.464582	0.642231	NA
WBGene00171291	24780	21ur-15538	0.125613	-2.80269	6.03271	0.464582	0.642231	NA
WBGene00171873	24814	21ur-13106	0.125613	-2.80269	6.03271	0.464582	0.642231	NA
WBGene00172214	11412	21ur-7854	0.125613	-2.80269	6.03271	0.464582	0.642231	NA
WBGene00172324	39914	21ur-7778	0.125613	-2.80269	6.03271	0.464582	0.642231	NA
WBGene00173283	40750	21ur-7228	0.125613	-2.80269	6.03271	0.464582	0.642231	NA
WBGene00173498	40941	21ur-11188	0.125613	-2.80269	6.03271	0.464582	0.642231	NA
WBGene00173564	40995	21ur-12095	0.125613	-2.80269	6.03271	0.464582	0.642231	NA
WBGene00173845	20725	21ur-10797	0.125613	-2.80269	6.03271	0.464582	0.642231	NA
WBGene00174412	41742	21ur-7397	0.125613	-2.80269	6.03271	0.464582	0.642231	NA
WBGene00189970	42281	mir-4812	0.125613	-2.80269	6.03271	0.464582	0.642231	NA
WBGene00195215	20742	F55G7.5	0.125613	-2.80269	6.03271	0.464582	0.642231	NA
WBGene00195558	25100	C18A3.13	0.125613	-2.80269	6.03271	0.464582	0.642231	NA
WBGene00195656	42550	T01H3.6	0.125613	-2.80269	6.03271	0.464582	0.642231	NA
WBGene00195789	42624	K08A8.6	0.125613	-2.80269	6.03271	0.464582	0.642231	NA
WBGene00196300	20314	T04C10.7	0.125613	-2.80269	6.03271	0.464582	0.642231	NA
WBGene00196571	43063	T06E4.17	0.125613	-2.80269	6.03271	0.464582	0.642231	NA
WBGene00196622	25298	F29D11.3	0.125613	-2.80269	6.03271	0.464582	0.642231	NA
WBGene00196632	20325	F22F4.8	0.125613	-2.80269	6.03271	0.464582	0.642231	NA
WBGene00196696	43131	H06I04.11	0.125613	-2.80269	6.03271	0.464582	0.642231	NA
WBGene00196968	43272	R06F6.13	0.125613	-2.80269	6.03271	0.464582	0.642231	NA
WBGene00197577	43619	W08F4.16	0.125613	-2.80269	6.03271	0.464582	0.642231	NA
WBGene00197758	43730	C36F7.15	0.125613	-2.80269	6.03271	0.464582	0.642231	NA
WBGene00197952	43840	C18D1.14	0.125613	-2.80269	6.03271	0.464582	0.642231	NA
WBGene00198120	17385	K03E5.6	0.125613	-2.80269	6.03271	0.464582	0.642231	NA
WBGene00198274	25608	F40H3.10	0.125613	-2.80269	6.03271	0.464582	0.642231	NA
WBGene00198328	44048	Y18H1A.17	0.125613	-2.80269	6.03271	0.464582	0.642231	NA
WBGene00199170	44510	C02D4.10	0.125613	-2.80269	6.03271	0.464582	0.642231	NA
WBGene00199222	44546	T07H6.8	0.125613	-2.80269	6.03271	0.464582	0.642231	NA
WBGene00199353	20828	C05B10.16	0.125613	-2.80269	6.03271	0.464582	0.642231	NA
WBGene00199585	44750	ZK1193.9	0.125613	-2.80269	6.03271	0.464582	0.642231	NA
WBGene00199678	44810	T10E10.12	0.125613	-2.80269	6.03271	0.464582	0.642231	NA
WBGene00199696	25877	H21P03.8	0.125613	-2.80269	6.03271	0.464582	0.642231	NA
WBGene00200169	25960	K07H8.15	0.125613	-2.80269	6.03271	0.464582	0.642231	NA
WBGene00200253	45130	C01G8.10	0.125613	-2.80269	6.03271	0.464582	0.642231	NA
WBGene00200415	26007	B0244.14	0.125613	-2.80269	6.03271	0.464582	0.642231	NA
WBGene00201634	45919	C18F3.11	0.125613	-2.80269	6.03271	0.464582	0.642231	NA
WBGene00201818	46031	R186.14	0.125613	-2.80269	6.03271	0.464582	0.642231	NA
WBGene00201827	46034	F26D11.19	0.125613	-2.80269	6.03271	0.464582	0.642231	NA
WBGene00201881	18428	R01E6.19	0.125613	-2.80269	6.03271	0.464582	0.642231	NA
WBGene00202113	26313	B0457.18	0.125613	-2.80269	6.03271	0.464582	0.642231	NA
WBGene00202239	46264	Y37E11B.14	0.125613	-2.80269	6.03271	0.464582	0.642231	NA
WBGene00202334	17428	C29E4.18	0.125613	-2.80269	6.03271	0.464582	0.642231	NA
WBGene00220097	26879	T25G12.15	0.125613	-2.80269	6.03271	0.464582	0.642231	NA
WBGene00011150	23461	nhr-269	0.223305	-2.80269	6.03271	0.464582	0.642231	NA
WBGene00011595	21613	T07G12.4	0.223305	-2.80269	6.03271	0.464582	0.642231	NA
WBGene00172671	40212	21ur-10484	0.223305	-2.80269	6.03271	0.464582	0.642231	NA
WBGene00219215	46425	F13B12.15	0.223305	-2.80269	6.03271	0.464582	0.642231	NA
WBGene00255731	20455	T02B11.11	0.223305	-2.80269	6.03271	0.464582	0.642231	NA
WBGene00195850	11928	F57C7.7	0.246551	-2.80269	6.03271	0.464582	0.642231	NA
WBGene00167897	24620	21ur-13198	0.228114	-2.80269	6.03271	0.464582	0.642231	NA
WBGene00169697	37612	21ur-5563	0.252398	-2.80269	6.03271	0.464582	0.642231	NA
WBGene00048316	24300	21ur-830	0.232924	-2.80269	6.03271	0.464582	0.642231	NA
WBGene00172202	39810	21ur-5941	0.232924	-2.80269	6.03271	0.464582	0.642231	NA
WBGene00198220	25591	C34D1.10	0.232924	-2.80269	6.03271	0.464582	0.642231	NA
WBGene00200059	25941	K02B2.36	0.232924	-2.80269	6.03271	0.464582	0.642231	NA
WBGene00005440	21009	srh-233	0.255156	-2.80269	6.03271	0.464582	0.642231	NA
WBGene00005360	23078	srh-144	0.314821	-2.80269	6.03271	0.464582	0.642231	NA
WBGene00006079	26950	str-11	0.314821	-2.80269	6.03271	0.464582	0.642231	NA
WBGene00005265	12543	srh-42	0.323798	-2.80269	6.03271	0.464582	0.642231	NA
WBGene00049728	32286	21ur-1955	0.276961	-2.80269	6.03271	0.464582	0.642231	NA
WBGene00268202	26930	T27B7.9	0.28177	-2.80269	6.03271	0.464582	0.642231	NA
WBGene00003760	26558	nlp-22	0.304677	-2.80269	6.03271	0.464582	0.642231	NA
WBGene00005706	26735	sru-43	0.330616	-2.80269	6.03271	0.464582	0.642231	NA
WBGene00044052	28301	Y57A10C.12	0.330616	-2.80269	6.03271	0.464582	0.642231	NA
WBGene00014068	20548	nhr-255	0.428308	-2.80269	6.03271	0.464582	0.642231	NA
WBGene00219704	19442	linc-127	0.428308	-2.80269	6.03271	0.464582	0.642231	NA
WBGene00005470	23108	srh-264	0.437928	-2.80269	6.03271	0.464582	0.642231	NA
WBGene00165679	20683	21ur-9408	0.477155	-2.80269	6.03271	0.464582	0.642231	NA
WBGene00194661	19377	Y57G11C.1131	0.623693	-2.80269	6.03271	0.464582	0.642231	NA
WBGene00006070	16019	str-2	0.359709	-2.80269	6.03271	0.464582	0.642231	NA
WBGene00011458	19127	irld-47	0.42149	-2.80269	6.03271	0.464582	0.642231	NA
WBGene00005546	23121	sri-34	0.362467	-2.80269	6.03271	0.464582	0.642231	NA
WBGene00005043	23004	sra-17	0.450583	-2.80269	6.03271	0.464582	0.642231	NA
WBGene00044103	20626	srbc-47	0.453341	-2.80269	6.03271	0.464582	0.642231	NA
WBGene00023228	28180	BE0003N10.t2	0.471521	-2.80269	6.03271	0.464582	0.642231	NA
WBGene00005667	26728	sru-4	0.406504	-2.80269	6.03271	0.464582	0.642231	NA
WBGene00005064	19517	sra-38	0.478504	-2.80269	6.03271	0.464582	0.642231	NA
WBGene00045487	17320	C08E8.7	0.617517	-2.80269	6.03271	0.464582	0.642231	NA
WBGene00005376	26649	srh-160	0.265117	-2.80269	6.03271	0.464581	0.642231	NA
WBGene00196392	42950	ZC487.7	0.265117	-2.80269	6.03271	0.464581	0.642231	NA
WBGene00269332	494	Y39F10A.6	0.265117	-2.80269	6.03271	0.464581	0.642231	NA
WBGene00045327	28487	mir-793	0.263682	-2.80269	6.03271	0.464581	0.642231	NA
WBGene00005881	26792	srw-134	0.224654	-2.80269	6.03271	0.464581	0.642231	NA
WBGene00199691	25875	F56B3.14	0.224654	-2.80269	6.03271	0.464581	0.642231	NA
WBGene00197890	25527	F47C8.2	0.30702	-2.80269	6.03271	0.464581	0.642231	NA
WBGene00016284	27740	C31B8.9	0.323696	-2.80269	6.03271	0.464581	0.642231	NA
WBGene00010415	27144	irld-39	0.320997	-2.80269	6.03271	0.464581	0.642231	NA
WBGene00003332	22981	mir-239.1	0.353862	-2.80269	6.03271	0.464581	0.642231	NA
WBGene00050931	18876	F59B2.14	0.353862	-2.80269	6.03271	0.464581	0.642231	NA
WBGene00005270	11051	srh-47	0.528699	-2.80269	6.03271	0.464581	0.642231	NA
WBGene00202480	46400	ZK829.13	0.499213	-2.80269	6.03271	0.464581	0.642231	NA
WBGene00170443	38270	21ur-7742	0.195365	-2.80269	6.03271	0.464581	0.642231	NA
WBGene00046836	29704	21ur-794	0.194647	-2.80269	6.03271	0.464581	0.642231	NA
WBGene00049589	32160	21ur-4486	0.175133	-2.80269	6.03271	0.464581	0.642231	NA
WBGene00174873	42148	21ur-7096	0.175133	-2.80269	6.03271	0.464581	0.642231	NA
WBGene00044454	19820	F27B3.8	0.174459	-2.80269	6.03271	0.464581	0.642231	NA
WBGene00046545	24197	21ur-10	0.174459	-2.80269	6.03271	0.464581	0.642231	NA
WBGene00165841	24514	21ur-13661	0.174459	-2.80269	6.03271	0.464581	0.642231	NA
WBGene00198839	25699	B0414.11	0.174459	-2.80269	6.03271	0.464581	0.642231	NA
WBGene00197694	25492	D2089.6	0.189005	-2.80269	6.03271	0.464581	0.642231	NA
WBGene00198063	25559	H05L03.7	0.189005	-2.80269	6.03271	0.464581	0.642231	NA
WBGene00200035	45008	Y59C2A.4	0.189005	-2.80269	6.03271	0.464581	0.642231	NA
WBGene00047728	24267	21ur-5136	0.179268	-2.80269	6.03271	0.464581	0.642231	NA
WBGene00047951	24282	21ur-940	0.179268	-2.80269	6.03271	0.464581	0.642231	NA
WBGene00170842	38622	21ur-15229	0.179268	-2.80269	6.03271	0.464581	0.642231	NA
WBGene00195847	42654	Y52E8A.7	0.179268	-2.80269	6.03271	0.464581	0.642231	NA
WBGene00196098	476	Y55F3AR.4	0.179268	-2.80269	6.03271	0.464581	0.642231	NA
WBGene00046979	29831	21ur-1522	0.190384	-2.80269	6.03271	0.464581	0.642231	NA
WBGene00077534	24442	F41D3.14	0.190384	-2.80269	6.03271	0.464581	0.642231	NA
WBGene00006277	27018	str-250	0.224705	-2.80269	6.03271	0.464581	0.642231	NA
WBGene00196603	43084	C13G3.5	0.224705	-2.80269	6.03271	0.464581	0.642231	NA
WBGene00202434	26370	K03C7.15	0.24902	-2.80269	6.03271	0.464581	0.642231	NA
WBGene00018556	27819	srt-36	0.250853	-2.80269	6.03271	0.464581	0.642231	NA
WBGene00169607	37538	21ur-9141	0.393891	-2.80269	6.03271	0.464581	0.642231	NA
WBGene00044128	20627	BE10.6	0.294406	-2.80269	6.03271	0.464581	0.642231	NA
WBGene00005600	26711	srj-12	0.418689	-2.80269	6.03271	0.464581	0.642231	NA
WBGene00200651	45363	ZC477.18	0.27831	-2.80269	6.03271	0.464581	0.642231	NA
WBGene00198480	44130	F54D5.21	0.362775	-2.80269	6.03271	0.464581	0.642231	NA
WBGene00197398	43517	F29F11.9	0.300207	-2.80269	6.03271	0.464581	0.642231	NA
WBGene00165027	33486	21ur-11151	0.382238	-2.80269	6.03271	0.464581	0.642231	NA
WBGene00173246	15887	21ur-8554	0.41373	-2.80269	6.03271	0.464581	0.642231	NA
WBGene00011547	23477	T06G6.5	0.632752	-2.80269	6.03271	0.464581	0.642231	NA
WBGene00202052	11451	C41G11.20	0.363599	-2.80269	6.03271	0.464581	0.642231	NA
WBGene00201511	21424	Y46E12A.9	0.453734	-2.80269	6.03271	0.464581	0.642231	NA
WBGene00011837	27203	srsx-33	0.509063	-2.80269	6.03271	0.464581	0.642231	NA
WBGene00050932	24428	F46B3.19	0.482391	-2.80269	6.03271	0.464581	0.642231	NA
WBGene00020494	18252	T13G4.7	0.633987	-2.80269	6.03271	0.464581	0.642231	NA
WBGene00016255	23723	C30E1.6	0.807434	-2.80269	6.03271	0.464581	0.642231	NA
WBGene00199923	44944	K04G2.14	0.515377	-2.80269	6.03271	0.464581	0.642231	NA
WBGene00009032	27100	bgnt-1.3	0.643707	-2.80269	6.03271	0.464581	0.642231	NA
WBGene00005701	17029	sru-38	0.616037	-2.80269	6.03271	0.464581	0.642231	NA
WBGene00009912	23374	srz-94	0.296757	-2.80268	6.03271	0.464581	0.642231	NA
WBGene00015888	27730	C17C3.2	0.417695	-2.80268	6.03271	0.464581	0.642231	NA
WBGene00173319	40780	21ur-6726	0.172288	-2.80268	6.03271	0.464581	0.642231	NA
WBGene00195791	20299	F42H10.9	0.172288	-2.80268	6.03271	0.464581	0.642231	NA
WBGene00197353	12425	T26E3.14	0.172288	-2.80268	6.03271	0.464581	0.642231	NA
WBGene00200223	45113	ZC518.7	0.172288	-2.80268	6.03271	0.464581	0.642231	NA
WBGene00201429	21421	F45H7.14	0.172288	-2.80268	6.03271	0.464581	0.642231	NA
WBGene00020547	18254	srz-7	0.299073	-2.80268	6.03271	0.464581	0.642231	NA
WBGene00006263	27010	str-232	0.301831	-2.80268	6.03271	0.464581	0.642231	NA
WBGene00022421	16150	Y102E9.3	0.333373	-2.80268	6.03271	0.464581	0.642231	NA
WBGene00045117	28432	M163.12	0.390107	-2.80268	6.03271	0.464581	0.642231	NA
WBGene00169634	23439	21ur-13874	0.211185	-2.80268	6.03271	0.464581	0.642231	NA
WBGene00199342	25798	F22B3.15	0.211185	-2.80268	6.03271	0.464581	0.642231	NA
WBGene00022556	23956	ZC204.6	0.406569	-2.80268	6.03271	0.464581	0.642231	NA
WBGene00219887	19938	F09E10.16	0.728738	-2.80268	6.03271	0.464581	0.642231	NA
WBGene00009760	14111	F46B3.7	0.218963	-2.80268	6.03271	0.464581	0.642231	NA
WBGene00016480	23737	srab-7	0.218963	-2.80268	6.03271	0.464581	0.642231	NA
WBGene00202449	26374	C10H11.14	0.218963	-2.80268	6.03271	0.464581	0.642231	NA
WBGene00195413	42422	D1022.11	0.357033	-2.80268	6.03271	0.464581	0.642231	NA
WBGene00005814	22529	srw-67	0.316655	-2.80268	6.03271	0.464581	0.642231	NA
WBGene00045193	17318	F53B2.10	0.316655	-2.80268	6.03271	0.464581	0.642231	NA
WBGene00017917	23792	clec-120	0.326274	-2.80268	6.03271	0.464581	0.642231	NA
WBGene00015447	19681	srab-2	0.414348	-2.80268	6.03271	0.464581	0.642231	NA
WBGene00006239	16527	str-206	0.507213	-2.80268	6.03271	0.464581	0.642231	NA
WBGene00005159	15523	srg-1	0.524357	-2.80268	6.03271	0.464581	0.642231	NA
WBGene00009598	20034	F40G12.3	0.532627	-2.80268	6.03271	0.464581	0.642231	NA
WBGene00165016	16214	21ur-14343	0.272619	-2.80268	6.03271	0.464581	0.642231	NA
WBGene00196702	25316	T12A7.11	0.313567	-2.80268	6.03271	0.464581	0.642231	NA
WBGene00020645	4896	T21D9.2	0.474817	-2.80268	6.03271	0.464581	0.642231	NA
WBGene00047499	19832	21ur-3762	0.576808	-2.80268	6.03271	0.464581	0.642231	NA
WBGene00196787	20329	C14B9.12	0.265638	-2.80268	6.03271	0.464581	0.642231	NA
WBGene00196990	25372	K04A8.14	0.265638	-2.80268	6.03271	0.464581	0.642231	NA
WBGene00006007	13056	srx-116	0.49349	-2.80268	6.03271	0.464581	0.642232	NA
WBGene00006027	23231	srx-136	0.690224	-2.80268	6.03271	0.464581	0.642232	NA
WBGene00004996	23001	spp-11	0.350412	-2.80268	6.03271	0.464581	0.642232	NA
WBGene00005914	16011	srx-23	0.507698	-2.80268	6.03271	0.464581	0.642232	NA
WBGene00005080	13039	srd-2	0.559129	-2.80268	6.03271	0.464581	0.642232	NA
WBGene00198101	25567	F52B5.9	0.747376	-2.80268	6.03271	0.464581	0.642232	NA
WBGene00005394	19985	srh-179	0.651918	-2.80268	6.03271	0.464581	0.642232	NA
WBGene00018058	17718	srbc-1	0.467901	-2.80268	6.03271	0.464581	0.642232	NA
WBGene00195882	11426	F59B10.7	0.845397	-2.80268	6.03271	0.464581	0.642232	NA
WBGene00196500	25282	T11F9.23	0.485836	-2.80266	6.00521	0.466705	0.640711	NA
WBGene00017871	9314	F28A10.3	0.885022	-2.80265	5.99007	0.467883	0.639869	NA
WBGene00005279	16506	srh-56	2.57725	-2.80261	2.61735	1.07078	0.284268	NA
WBGene00018557	21187	srt-38	0.585233	-2.80245	5.77574	0.485211	0.627527	NA
WBGene00199231	19406	C34H3.16	0.599708	-2.8023	5.62401	0.498274	0.618291	NA
WBGene00195242	20279	Y113G7B.28	0.649368	-2.80218	5.51629	0.507984	0.611465	NA
WBGene00047756	14847	21ur-3500	0.69268	-2.80218	5.51417	0.508178	0.611329	NA
WBGene00006015	18536	srx-124	0.692269	-2.80213	5.47191	0.512093	0.608586	NA
WBGene00198842	20376	K07E3.10	0.769868	-2.802	5.36823	0.52196	0.601698	NA
WBGene00015428	21138	C04E7.1	0.856873	-2.8019	5.28305	0.530356	0.595865	NA
WBGene00018815	27827	F54D12.1	0.874034	-2.80177	5.18939	0.539904	0.589263	NA
WBGene00195887	16290	Y47D3A.33	0.894846	-2.80174	5.16415	0.542536	0.587449	NA
WBGene00169680	15380	21ur-5677	0.775768	-2.80168	5.12054	0.547145	0.584279	NA
WBGene00005791	16007	srw-44	0.875534	-2.80162	5.08277	0.5512	0.581496	NA
WBGene00001967	22485	hlh-28	0.827607	-2.80162	5.07837	0.551677	0.58117	NA
WBGene00009147	23343	F26C11.3	0.970084	-2.80147	4.9811	0.562419	0.573831	NA
WBGene00044059	12361	T27C5.12	0.978343	-2.80124	4.84047	0.578713	0.562783	NA
WBGene00017695	13245	fip-1	1.07858	-2.80104	4.72911	0.592298	0.553651	NA
WBGene00198768	18410	T24D5.9	0.719172	-2.80088	4.6455	0.602923	0.54656	NA
WBGene00011982	27210	T24C2.3	0.738641	-2.80073	4.56942	0.612929	0.539923	NA
WBGene00015411	23691	srz-60	0.990077	-2.8006	4.51147	0.620774	0.534748	NA
WBGene00009763	20036	srz-18	1.22943	-2.80027	4.36447	0.641605	0.52113	NA
WBGene00010753	11143	K10G4.4	0.879451	-2.80015	4.31709	0.648619	0.516584	NA
WBGene00007821	8608	clec-201	0.90023	-2.80014	4.31202	0.649379	0.516093	NA
WBGene00219708	15453	linc-13	1.29091	-2.79994	4.23594	0.660997	0.508614	NA
WBGene00017021	2326	D1022.2	1.10305	-2.79988	4.21437	0.664365	0.506457	NA
WBGene00005782	15535	srw-35	0.885978	-2.79987	4.20846	0.665295	0.505862	NA
WBGene00196777	43176	T19A5.13	1.14874	-2.79979	4.18198	0.66949	0.503183	NA
WBGene00011084	15631	srsx-21	1.32567	-2.79963	4.12438	0.6788	0.497264	NA
WBGene00013451	11193	Y67A10A.2	1.29347	-2.79961	4.11715	0.679988	0.496512	NA
WBGene00197025	9449	C14F5.7	1.18691	-2.79935	4.02973	0.694674	0.487259	NA
WBGene00201900	7966	T21C9.17	1.48351	-2.79929	4.01377	0.697422	0.485538	NA
WBGene00049835	21280	21ur-1928	0.785681	-2.79924	3.99502	0.700682	0.483501	NA
WBGene00255584	14965	mir-8187	1.09024	-2.79911	3.95611	0.707541	0.47923	NA
WBGene00007618	6138	C15H11.10	1.1297	-2.79898	3.91651	0.714661	0.474818	NA
WBGene00195238	25041	mir-4805	1.1414	-2.7989	3.89565	0.718469	0.472468	NA
WBGene00012384	23514	Y5F2A.3	1.53156	-2.79873	3.84638	0.727627	0.466842	NA
WBGene00012233	10189	clpr-1	1.39159	-2.79864	3.82213	0.73222	0.464034	NA
WBGene00018322	9322	F41H10.12	1.26643	-2.79855	3.79793	0.736862	0.461206	NA
WBGene00018110	21178	F36H9.1	1.35033	-2.79839	3.75814	0.744622	0.4565	NA
WBGene00022007	21220	mpst-6	0.993223	-2.79809	3.68287	0.759757	0.4474	NA
WBGene00043239	18849	F08D12.5	2.41398	-2.79742	3.53658	0.790994	0.428948	NA
WBGene00020602	16713	T20B12.4	1.86546	-2.79732	3.51738	0.795287	0.426447	NA
WBGene00011421	23474	T04B2.1	1.44811	-2.79731	3.5137	0.796113	0.425966	NA
WBGene00010166	23383	gmd-2	1.42929	-2.79702	3.45783	0.808896	0.418575	NA
WBGene00005500	13548	srh-296	1.2158	-2.79694	3.44243	0.812489	0.416511	NA
WBGene00173233	24900	21ur-6562	0.986891	-2.79693	3.44085	0.812861	0.416298	NA
WBGene00044048	19329	F57G9.7	1.43112	-2.79682	3.42	0.817783	0.413481	NA
WBGene00007401	21531	C07A9.5	1.27243	-2.79679	3.41573	0.818798	0.412902	NA
WBGene00170345	24740	21ur-14817	1.15974	-2.79676	3.40865	0.820488	0.411938	NA
WBGene00016016	10259	C23G10.10	1.80562	-2.79618	3.30979	0.844821	0.398211	NA
WBGene00021668	23932	Y48G1BM.2	2.03937	-2.79377	2.98204	0.936868	0.348826	NA
WBGene00014926	18696	Y57G11C.30	1.49423	-2.79157	2.76434	1.00985	0.312567	NA
WBGene00015845	22700	C16C8.7	2.46377	-2.79139	2.74913	1.01537	0.30993	NA
WBGene00010863	12630	M04D8.5	2.26169	-2.79094	2.71225	1.02901	0.303474	NA
WBGene00047167	29995	21ur-3130	2.23173	-2.78929	2.59125	1.07643	0.281736	NA
WBGene00005142	10547	srd-65	5.49647	-2.7882	2.52129	1.10586	0.268787	0.508082
WBGene00019112	5851	F59E11.6	3.9321	-2.78123	1.58855	1.75079	0.0799815	0.24939
WBGene00219687	13456	linc-12	3.57969	-2.78006	2.16063	1.28669	0.198202	0.428365
WBGene00219280	18939	C05B5.16	0.957783	-2.77702	5.71369	0.48603	0.626946	NA
WBGene00012108	17625	T28A8.2	3.23848	-2.7739	2.04476	1.35659	0.174911	0.39694
WBGene00012450	22125	Y17D7B.2	37.3404	-2.77362	0.678548	4.08757	4.35909e-05	0.000647668
WBGene00018477	23816	otpl-4	1.83813	-2.76736	3.64927	0.758332	0.448252	NA
WBGene00023230	28182	BE0003N10.t4	0.121902	-2.76187	6.03512	0.457633	0.647216	NA
WBGene00173441	40891	21ur-6949	0.121902	-2.76187	6.03512	0.457633	0.647216	NA
WBGene00197723	43708	Y69A2AR.39	0.121902	-2.76187	6.03512	0.457633	0.647216	NA
WBGene00200878	26100	Y47G6A.35	0.121902	-2.76187	6.03512	0.457633	0.647216	NA
WBGene00220144	46684	Y39A1A.30	0.121902	-2.76187	6.03512	0.457633	0.647216	NA
WBGene00199020	10444	Y48A6B.16	0.285716	-2.76187	6.03512	0.457633	0.647216	NA
WBGene00016433	23731	C35B1.3	0.170749	-2.76187	6.03512	0.457633	0.647216	NA
WBGene00047879	20185	21ur-742	0.182372	-2.76187	6.03512	0.457633	0.647216	NA
WBGene00200954	26114	C37E2.8	0.268441	-2.76187	6.03512	0.457633	0.647216	NA
WBGene00005469	23107	srh-263	0.336525	-2.76187	6.03512	0.457633	0.647216	NA
WBGene00005708	20487	sru-45	0.369506	-2.76187	6.03512	0.457633	0.647216	NA
WBGene00018912	27838	F56A4.4	0.285041	-2.76187	6.03512	0.457633	0.647216	NA
WBGene00021566	23924	Y45G12C.3	0.285041	-2.76187	6.03512	0.457633	0.647216	NA
WBGene00198847	12932	F49E2.8	0.368934	-2.76187	6.03512	0.457633	0.647216	NA
WBGene00198670	22416	F14F3.11	0.328255	-2.76187	6.03512	0.457633	0.647216	NA
WBGene00197005	43287	K02A11.6	0.349138	-2.76187	6.03512	0.457633	0.647216	NA
WBGene00044962	28379	F28D1.13	0.490689	-2.76187	5.98333	0.461594	0.644372	NA
WBGene00170615	17344	21ur-15001	0.471435	-2.76187	5.97751	0.462043	0.64405	NA
WBGene00201060	45593	K10G6.7	0.168578	-2.76187	6.03512	0.457633	0.647216	NA
WBGene00201570	20892	F09E5.22	0.315791	-2.76187	6.03512	0.457633	0.647216	NA
WBGene00235367	19951	F49F1.17	0.264774	-2.76187	6.03512	0.457633	0.647216	NA
WBGene00235329	20947	F37B4.15	0.275722	-2.76187	6.03512	0.457633	0.647216	NA
WBGene00048349	17322	21ur-296	0.33866	-2.76187	6.03512	0.457633	0.647216	NA
WBGene00196583	18386	R13A1.14	0.489583	-2.76187	5.99439	0.460742	0.644984	NA
WBGene00173902	41291	21ur-6089	0.499283	-2.76184	4.95559	0.557319	0.577309	NA
WBGene00197630	13920	AH10.8	0.662029	-2.76184	4.74041	0.582616	0.560152	NA
WBGene00198692	22908	C09H10.13	0.579556	-2.76183	4.70188	0.587389	0.556943	NA
WBGene00048676	24319	21ur-4385	0.670595	-2.76183	4.61778	0.598085	0.549783	NA
WBGene00201181	13941	C16C2.9	0.650258	-2.76183	4.51525	0.611666	0.540759	NA
WBGene00171041	38794	21ur-12950	0.928837	-2.76181	4.2762	0.645857	0.518372	NA
WBGene00044000	17301	Y75B8A.41	1.03124	-2.7618	4.22698	0.653376	0.513514	NA
WBGene00168952	36971	21ur-11082	0.621891	-2.7618	4.14687	0.665997	0.505413	NA
WBGene00255579	19454	mir-8194	0.911985	-2.7618	4.10067	0.673499	0.50063	NA
WBGene00014542	23621	W04G5.11	1.45351	-2.76179	4.02845	0.685573	0.492983	NA
WBGene00201967	21430	F17E5.6	1.32677	-2.76178	3.92668	0.703338	0.481845	NA
WBGene00194656	42284	T05F1.15	0.745001	-2.76178	3.88302	0.711245	0.476932	NA
WBGene00045646	13873	21ur-4784	0.926616	-2.76169	3.26361	0.846208	0.397437	NA
WBGene00048104	12388	21ur-4875	0.937876	-2.76169	3.23971	0.852449	0.393965	NA
WBGene00005848	23187	srw-101	0.953694	-2.75975	5.5768	0.494864	0.620696	NA
WBGene00007682	13591	C18D11.6	9.27495	-2.75326	0.936735	2.93921	0.00329049	0.0258383
WBGene00010586	13128	K05C4.10	2.15859	-2.73417	2.55772	1.06899	0.285075	NA
WBGene00044932	16174	Y37E3.22	1.59552	-2.73075	2.8251	0.966601	0.333743	NA
WBGene00010761	13130	K10H10.5	2.82708	-2.72975	2.92369	0.933664	0.350477	NA
WBGene00077523	17860	C23H5.12	1.57685	-2.72898	3.00922	0.906872	0.364475	NA
WBGene00020641	12319	fbxa-68	2.43384	-2.72862	3.05132	0.894243	0.371192	NA
WBGene00015242	21135	B0524.3	1.41822	-2.72769	3.17342	0.859542	0.390042	NA
WBGene00007364	20019	stdh-3	1.46192	-2.72767	3.17645	0.858716	0.390497	NA
WBGene00008618	20026	fbxa-45	1.56159	-2.72703	3.27147	0.833577	0.404519	NA
WBGene00006953	5100	wrt-7	1.82485	-2.727	3.27514	0.832636	0.40505	NA
WBGene00008374	19585	clec-220	2.07534	-2.72697	3.28006	0.831378	0.40576	NA
WBGene00023274	20147	F23C8.10	1.21134	-2.72691	3.289	0.829101	0.407047	NA
WBGene00015380	7259	C03B1.10	0.984769	-2.72674	3.31577	0.822357	0.410874	NA
WBGene00020227	23875	T05A8.1	1.43643	-2.7265	3.35564	0.812513	0.416498	NA
WBGene00005664	17028	sru-1	2.23283	-2.72645	3.36452	0.810352	0.417738	NA
WBGene00011024	22622	R05A10.7	1.76781	-2.72611	3.42371	0.796247	0.425889	NA
WBGene00255420	14964	Y51F10.15	2.36972	-2.72599	3.44555	0.791162	0.428849	NA
WBGene00235287	16955	Y55F3C.17	1.64645	-2.72576	3.48916	0.781209	0.43468	NA
WBGene00013798	16083	clec-195	1.06518	-2.72503	3.63945	0.748748	0.454009	NA
WBGene00005692	22524	sru-29	1.74651	-2.72479	2.8331	0.96177	0.336165	NA
WBGene00006077	19543	str-9	1.15041	-2.72464	3.72971	0.730523	0.465071	NA
WBGene00200423	12438	T11F9.27	0.807732	-2.7246	3.73988	0.728526	0.466292	NA
WBGene00005964	14539	srx-73	1.18939	-2.72417	3.84861	0.707832	0.47905	NA
WBGene00008961	21564	F19H6.6	1.13232	-2.7233	4.1062	0.663215	0.507193	NA
WBGene00022869	17293	ZK1240.4	1.12608	-2.72323	4.12838	0.659635	0.509488	NA
WBGene00005431	16511	srh-221	1.1375	-2.72307	4.18109	0.651283	0.514864	NA
WBGene00006285	23272	str-259	1.47905	-2.72303	4.19333	0.649373	0.516097	NA
WBGene00019575	9846	K09E3.4	0.808788	-2.72288	4.24752	0.641052	0.521489	NA
WBGene00017581	19223	F18G5.5	1.02901	-2.72277	4.28728	0.635083	0.525374	NA
WBGene00010021	23378	srbc-49	1.14717	-2.72265	4.33549	0.627992	0.530009	NA
WBGene00006139	23246	str-79	1.52737	-2.7226	4.35614	0.625003	0.531969	NA
WBGene00016297	21680	fbxc-15	1.12882	-2.72255	4.37478	0.62233	0.533725	NA
WBGene00006093	23234	str-27	0.882986	-2.72249	4.40127	0.618569	0.536201	NA
WBGene00196470	25279	R05D3.13	0.699437	-2.72199	4.62046	0.589115	0.555784	NA
WBGene00001720	17491	grl-11	0.994988	-2.72182	4.70192	0.578875	0.562674	NA
WBGene00005326	23062	srh-107	1.27765	-2.72172	4.75324	0.572604	0.566913	NA
WBGene00022315	21772	Y81B9A.1	1.10434	-2.72165	4.78884	0.568332	0.569809	NA
WBGene00009707	15107	srxa-16	1.08294	-2.72147	4.88908	0.556643	0.577771	NA
WBGene00006178	26984	str-129	0.975675	-2.72142	4.91766	0.553398	0.579991	NA
WBGene00005562	26701	sri-50	1.02841	-2.72129	4.99775	0.544502	0.586096	NA
WBGene00005399	21008	srh-184	0.925086	-2.72103	5.16451	0.526871	0.598283	NA
WBGene00020520	15796	T15B7.8	0.781511	-2.72103	5.16655	0.526663	0.598428	NA
WBGene00005247	23046	srh-22	0.777958	-2.72086	5.28069	0.515247	0.606381	NA
WBGene00005886	16520	srw-139	0.738416	-2.72086	5.2848	0.514846	0.606661	NA
WBGene00010929	23454	srt-45	0.690582	-2.72063	5.45713	0.498546	0.618099	NA
WBGene00189955	42279	F40G9.19	0.74244	-2.72061	5.4692	0.497442	0.618877	NA
WBGene00172830	24879	21ur-10246	0.601291	-2.72052	5.55013	0.490171	0.624013	NA
WBGene00005753	21020	srw-6	0.625232	-2.72047	5.58659	0.486965	0.626283	NA
WBGene00219410	19928	C04C3.14	3.16193	-2.72045	5.60536	0.48533	0.627442	NA
WBGene00019685	21201	K12H6.5	0.586808	-2.72038	5.66626	0.480102	0.631155	NA
WBGene00005841	97	srw-94	0.606133	-2.72037	5.67743	0.479155	0.631828	NA
WBGene00016804	23753	C50C3.12	0.994689	-2.72036	5.68948	0.478138	0.632552	NA
WBGene00044416	28330	C08E3.15	0.937826	-2.72035	5.70023	0.477235	0.633195	NA
WBGene00017619	14731	F20A1.8	0.894157	-2.72027	5.76801	0.471613	0.637203	NA
WBGene00201070	45600	F25H10.9	0.479024	-2.72013	5.90162	0.460913	0.644861	NA
WBGene00005751	16518	srw-4	0.899102	-2.72007	5.97366	0.455344	0.648862	NA
WBGene00010927	27165	clec-259	0.929099	-2.72001	6.03526	0.450687	0.652215	NA
WBGene00005055	23007	sra-29	0.118192	-2.72001	6.03766	0.450507	0.652345	NA
WBGene00005075	23013	srb-10	0.118192	-2.72001	6.03766	0.450507	0.652345	NA
WBGene00005115	23019	srd-37	0.118192	-2.72001	6.03766	0.450507	0.652345	NA
WBGene00005301	26628	srh-80	0.118192	-2.72001	6.03766	0.450507	0.652345	NA
WBGene00005319	26633	srh-100	0.118192	-2.72001	6.03766	0.450507	0.652345	NA
WBGene00005443	26668	srh-236	0.118192	-2.72001	6.03766	0.450507	0.652345	NA
WBGene00005448	26670	srh-241	0.118192	-2.72001	6.03766	0.450507	0.652345	NA
WBGene00005590	23132	sri-78	0.118192	-2.72001	6.03766	0.450507	0.652345	NA
WBGene00005785	26759	srw-38	0.118192	-2.72001	6.03766	0.450507	0.652345	NA
WBGene00005963	14055	srx-72	0.118192	-2.72001	6.03766	0.450507	0.652345	NA
WBGene00006018	23228	srx-127	0.118192	-2.72001	6.03766	0.450507	0.652345	NA
WBGene00006144	26974	str-85	0.118192	-2.72001	6.03766	0.450507	0.652345	NA
WBGene00007893	21544	C33B4.5	0.118192	-2.72001	6.03766	0.450507	0.652345	NA
WBGene00009762	27120	F46B3.9	0.118192	-2.72001	6.03766	0.450507	0.652345	NA
WBGene00010598	27155	K06B4.3	0.118192	-2.72001	6.03766	0.450507	0.652345	NA
WBGene00011784	27202	T15D6.10	0.118192	-2.72001	6.03766	0.450507	0.652345	NA
WBGene00013528	27276	Y73F8A.23	0.118192	-2.72001	6.03766	0.450507	0.652345	NA
WBGene00014038	27300	ZK643.7	0.118192	-2.72001	6.03766	0.450507	0.652345	NA
WBGene00015316	27703	srbc-30	0.118192	-2.72001	6.03766	0.450507	0.652345	NA
WBGene00015761	23703	C14C6.7	0.118192	-2.72001	6.03766	0.450507	0.652345	NA
WBGene00017202	27772	clec-46	0.118192	-2.72001	6.03766	0.450507	0.652345	NA
WBGene00017652	23784	F21C10.1	0.118192	-2.72001	6.03766	0.450507	0.652345	NA
WBGene00018388	23808	F43C11.11	0.118192	-2.72001	6.03766	0.450507	0.652345	NA
WBGene00020623	27890	srab-21	0.118192	-2.72001	6.03766	0.450507	0.652345	NA
WBGene00021138	23904	clec-127	0.118192	-2.72001	6.03766	0.450507	0.652345	NA
WBGene00044133	18307	C44C10.12	0.118192	-2.72001	6.03766	0.450507	0.652345	NA
WBGene00044179	21249	C30G7.5	0.118192	-2.72001	6.03766	0.450507	0.652345	NA
WBGene00044246	24063	F36D1.10	0.118192	-2.72001	6.03766	0.450507	0.652345	NA
WBGene00044706	28345	Y26D4A.15	0.118192	-2.72001	6.03766	0.450507	0.652345	NA
WBGene00045122	24115	F22B3.10	0.118192	-2.72001	6.03766	0.450507	0.652345	NA
WBGene00045654	28642	21ur-3621	0.118192	-2.72001	6.03766	0.450507	0.652345	NA
WBGene00047184	24243	21ur-1259	0.118192	-2.72001	6.03766	0.450507	0.652345	NA
WBGene00048299	31007	21ur-2429	0.118192	-2.72001	6.03766	0.450507	0.652345	NA
WBGene00048305	31012	21ur-1655	0.118192	-2.72001	6.03766	0.450507	0.652345	NA
WBGene00048520	31203	21ur-2692	0.118192	-2.72001	6.03766	0.450507	0.652345	NA
WBGene00048551	31231	21ur-2983	0.118192	-2.72001	6.03766	0.450507	0.652345	NA
WBGene00049252	31860	21ur-5230	0.118192	-2.72001	6.03766	0.450507	0.652345	NA
WBGene00049699	32258	21ur-3221	0.118192	-2.72001	6.03766	0.450507	0.652345	NA
WBGene00049915	32460	21ur-1804	0.118192	-2.72001	6.03766	0.450507	0.652345	NA
WBGene00050335	32841	21ur-2763	0.118192	-2.72001	6.03766	0.450507	0.652345	NA
WBGene00077467	33362	rrn-4.4	0.118192	-2.72001	6.03766	0.450507	0.652345	NA
WBGene00165497	33897	21ur-7295	0.118192	-2.72001	6.03766	0.450507	0.652345	NA
WBGene00169238	37218	21ur-6757	0.118192	-2.72001	6.03766	0.450507	0.652345	NA
WBGene00169802	37707	21ur-13844	0.118192	-2.72001	6.03766	0.450507	0.652345	NA
WBGene00170281	38128	21ur-5914	0.118192	-2.72001	6.03766	0.450507	0.652345	NA
WBGene00170966	24763	21ur-9548	0.118192	-2.72001	6.03766	0.450507	0.652345	NA
WBGene00171017	38772	21ur-7862	0.118192	-2.72001	6.03766	0.450507	0.652345	NA
WBGene00171621	39307	21ur-15078	0.118192	-2.72001	6.03766	0.450507	0.652345	NA
WBGene00172024	39654	21ur-11493	0.118192	-2.72001	6.03766	0.450507	0.652345	NA
WBGene00172042	24822	21ur-7508	0.118192	-2.72001	6.03766	0.450507	0.652345	NA
WBGene00172218	39822	21ur-14358	0.118192	-2.72001	6.03766	0.450507	0.652345	NA
WBGene00172304	39896	21ur-13295	0.118192	-2.72001	6.03766	0.450507	0.652345	NA
WBGene00172551	40109	21ur-5972	0.118192	-2.72001	6.03766	0.450507	0.652345	NA
WBGene00172685	40224	21ur-10550	0.118192	-2.72001	6.03766	0.450507	0.652345	NA
WBGene00172983	40487	21ur-11512	0.118192	-2.72001	6.03766	0.450507	0.652345	NA
WBGene00173419	40871	21ur-6956	0.118192	-2.72001	6.03766	0.450507	0.652345	NA
WBGene00173618	41044	21ur-12994	0.118192	-2.72001	6.03766	0.450507	0.652345	NA
WBGene00174955	42215	21ur-12284	0.118192	-2.72001	6.03766	0.450507	0.652345	NA
WBGene00195454	13409	ZK742.8	0.118192	-2.72001	6.03766	0.450507	0.652345	NA
WBGene00195659	25118	Y69E1A.9	0.118192	-2.72001	6.03766	0.450507	0.652345	NA
WBGene00196073	42780	F54D12.13	0.118192	-2.72001	6.03766	0.450507	0.652345	NA
WBGene00196643	43102	F45B8.9	0.118192	-2.72001	6.03766	0.450507	0.652345	NA
WBGene00196713	43140	F18A12.9	0.118192	-2.72001	6.03766	0.450507	0.652345	NA
WBGene00197243	25418	C06G1.11	0.118192	-2.72001	6.03766	0.450507	0.652345	NA
WBGene00197423	25446	F40F8.14	0.118192	-2.72001	6.03766	0.450507	0.652345	NA
WBGene00197969	43852	Y70D2A.6	0.118192	-2.72001	6.03766	0.450507	0.652345	NA
WBGene00198121	25569	R04F11.16	0.118192	-2.72001	6.03766	0.450507	0.652345	NA
WBGene00198141	43949	C16B8.7	0.118192	-2.72001	6.03766	0.450507	0.652345	NA
WBGene00198264	25606	K12F2.3	0.118192	-2.72001	6.03766	0.450507	0.652345	NA
WBGene00198708	44253	C01A2.10	0.118192	-2.72001	6.03766	0.450507	0.652345	NA
WBGene00198771	44285	C06H2.9	0.118192	-2.72001	6.03766	0.450507	0.652345	NA
WBGene00198852	44338	F26F12.16	0.118192	-2.72001	6.03766	0.450507	0.652345	NA
WBGene00199390	25807	B0273.111	0.118192	-2.72001	6.03766	0.450507	0.652345	NA
WBGene00199463	20829	F48A9.5	0.118192	-2.72001	6.03766	0.450507	0.652345	NA
WBGene00199629	44781	F52F12.14	0.118192	-2.72001	6.03766	0.450507	0.652345	NA
WBGene00200567	26035	K11G9.13	0.118192	-2.72001	6.03766	0.450507	0.652345	NA
WBGene00200579	45320	B0034.15	0.118192	-2.72001	6.03766	0.450507	0.652345	NA
WBGene00200823	26079	Y54G2A.68	0.118192	-2.72001	6.03766	0.450507	0.652345	NA
WBGene00201315	45729	C16B8.12	0.118192	-2.72001	6.03766	0.450507	0.652345	NA
WBGene00201540	26205	C54D2.17	0.118192	-2.72001	6.03766	0.450507	0.652345	NA
WBGene00201566	26210	C04D8.4	0.118192	-2.72001	6.03766	0.450507	0.652345	NA
WBGene00201977	46116	C01G12.15	0.118192	-2.72001	6.03766	0.450507	0.652345	NA
WBGene00202079	26306	F38E11.25	0.118192	-2.72001	6.03766	0.450507	0.652345	NA
WBGene00202209	46244	Y41D4B.31	0.118192	-2.72001	6.03766	0.450507	0.652345	NA
WBGene00219626	19932	linc-157	0.118192	-2.72001	6.03766	0.450507	0.652345	NA
WBGene00219899	46564	F17C11.24	0.118192	-2.72001	6.03766	0.450507	0.652345	NA
WBGene00220251	21952	F07C6.8	0.118192	-2.72001	6.03766	0.450507	0.652345	NA
WBGene00235364	26917	F49F1.4	0.118192	-2.72001	6.03766	0.450507	0.652345	NA
WBGene00195252	20281	K10D6.6	0.257696	-2.72001	6.03766	0.450507	0.652345	NA
WBGene00219706	46490	linc-158	0.257696	-2.72001	6.03766	0.450507	0.652345	NA
WBGene00005119	26598	srd-41	0.256262	-2.72001	6.03766	0.450507	0.652345	NA
WBGene00006248	19025	str-216	0.217234	-2.72001	6.03766	0.450507	0.652345	NA
WBGene00198151	21371	C04F12.15	0.217234	-2.72001	6.03766	0.450507	0.652345	NA
WBGene00220051	26870	R160.11	0.217234	-2.72001	6.03766	0.450507	0.652345	NA
WBGene00235112	12958	T23B5.6	0.217234	-2.72001	6.03766	0.450507	0.652345	NA
WBGene00010301	27134	F59A1.16	0.215884	-2.72001	6.03766	0.450507	0.652345	NA
WBGene00044376	8909	Y49F6B.12	0.215884	-2.72001	6.03766	0.450507	0.652345	NA
WBGene00045344	24129	Y43F8C.23	0.215884	-2.72001	6.03766	0.450507	0.652345	NA
WBGene00195286	42355	C03E10.8	0.215884	-2.72001	6.03766	0.450507	0.652345	NA
WBGene00197014	43293	C34B2.13	0.215884	-2.72001	6.03766	0.450507	0.652345	NA
WBGene00023356	24023	W03F9.8	0.23913	-2.72001	6.03766	0.450507	0.652345	NA
WBGene00197600	43633	C14F5.8	0.244977	-2.72001	6.03766	0.450507	0.652345	NA
WBGene00201387	45769	H19M22.10	0.244977	-2.72001	6.03766	0.450507	0.652345	NA
WBGene00201688	26235	Y71A12B.31	0.244977	-2.72001	6.03766	0.450507	0.652345	NA
WBGene00206523	46421	C54E10.10	0.244977	-2.72001	6.03766	0.450507	0.652345	NA
WBGene00005054	26589	sra-28	0.225504	-2.72001	6.03766	0.450507	0.652345	NA
WBGene00005328	23063	srh-109	0.225504	-2.72001	6.03766	0.450507	0.652345	NA
WBGene00007158	27034	B0379.6	0.225504	-2.72001	6.03766	0.450507	0.652345	NA
WBGene00023511	28285	srz-41	0.225504	-2.72001	6.03766	0.450507	0.652345	NA
WBGene00077506	33388	F25D1.7	0.225504	-2.72001	6.03766	0.450507	0.652345	NA
WBGene00198838	44333	K10C3.10	0.225504	-2.72001	6.03766	0.450507	0.652345	NA
WBGene00200839	45471	F53B3.11	0.225504	-2.72001	6.03766	0.450507	0.652345	NA
WBGene00050253	24394	21ur-2631	0.327448	-2.72001	6.03766	0.450507	0.652345	NA
WBGene00045726	21267	21ur-4151	0.325297	-2.72001	6.03766	0.450507	0.652345	NA
WBGene00198896	44363	C07A4.9	0.264731	-2.72001	6.03766	0.450507	0.652345	NA
WBGene00167078	35280	21ur-7313	0.2996	-2.72001	6.03766	0.450507	0.652345	NA
WBGene00011485	23475	srbc-14	0.316275	-2.72001	6.03766	0.450507	0.652345	NA
WBGene00014882	23660	Y39B6A.t8	0.316275	-2.72001	6.03766	0.450507	0.652345	NA
WBGene00044390	10390	ZK177.11	0.360069	-2.72001	6.03766	0.450507	0.652345	NA
WBGene00086564	24467	K08C9.10	0.353954	-2.72001	6.03766	0.450507	0.652345	NA
WBGene00049516	24359	21ur-2394	0.314926	-2.72001	6.03766	0.450507	0.652345	NA
WBGene00005035	17531	sra-9	0.365008	-2.72001	6.03766	0.450507	0.652345	NA
WBGene00013114	23543	Y51H4A.20	0.363573	-2.72001	6.03766	0.450507	0.652345	NA
WBGene00005462	21011	srh-256	0.336823	-2.72001	6.03766	0.450507	0.652345	NA
WBGene00006011	16017	srx-120	0.368673	-2.72001	6.03766	0.450507	0.652345	NA
WBGene00014925	27671	Y57G11C.29	0.364447	-2.72001	6.03766	0.450507	0.652345	NA
WBGene00045159	16178	smy-3	0.475477	-2.72001	6.03766	0.450507	0.652345	NA
WBGene00196408	42957	F15G9.7	0.394274	-2.72001	6.03766	0.450507	0.652345	NA
WBGene00045132	28438	ZK643.9	0.45443	-2.72001	6.03766	0.450507	0.652345	NA
WBGene00005527	21014	sri-15	0.588653	-2.72001	6.03766	0.450507	0.652345	NA
WBGene00044748	28355	ZK402.6	0.187227	-2.72001	6.03766	0.450507	0.652345	NA
WBGene00047326	30141	21ur-4876	0.187227	-2.72001	6.03766	0.450507	0.652345	NA
WBGene00172841	40355	21ur-10134	0.187227	-2.72001	6.03766	0.450507	0.652345	NA
WBGene00196721	19393	F57B10.17	0.187227	-2.72001	6.03766	0.450507	0.652345	NA
WBGene00195383	25064	C09B8.10	0.167713	-2.72001	6.03766	0.450507	0.652345	NA
WBGene00201300	26171	Y54E10A.27	0.167713	-2.72001	6.03766	0.450507	0.652345	NA
WBGene00219600	26432	linc-118	0.167713	-2.72001	6.03766	0.450507	0.652345	NA
WBGene00019419	27855	K05F6.8	0.167038	-2.72001	6.03766	0.450507	0.652345	NA
WBGene00050387	24399	21ur-1414	0.167038	-2.72001	6.03766	0.450507	0.652345	NA
WBGene00166164	24539	21ur-9021	0.167038	-2.72001	6.03766	0.450507	0.652345	NA
WBGene00170980	38739	21ur-7956	0.167038	-2.72001	6.03766	0.450507	0.652345	NA
WBGene00202059	20424	C06G1.17	0.167038	-2.72001	6.03766	0.450507	0.652345	NA
WBGene00046687	29570	21ur-3049	0.181585	-2.72001	6.03766	0.450507	0.652345	NA
WBGene00048254	30966	21ur-276	0.181585	-2.72001	6.03766	0.450507	0.652345	NA
WBGene00077608	20211	F22B8.9	0.181585	-2.72001	6.03766	0.450507	0.652345	NA
WBGene00015489	20561	C05E4.7	0.171848	-2.72001	6.03766	0.450507	0.652345	NA
WBGene00048553	31233	21ur-1321	0.171848	-2.72001	6.03766	0.450507	0.652345	NA
WBGene00200909	45509	H08J11.12	0.171848	-2.72001	6.03766	0.450507	0.652345	NA
WBGene00201450	45805	F46C3.9	0.171848	-2.72001	6.03766	0.450507	0.652345	NA
WBGene00201756	45988	C34H3.22	0.171848	-2.72001	6.03766	0.450507	0.652345	NA
WBGene00220096	26878	T25D10.11	0.171848	-2.72001	6.03766	0.450507	0.652345	NA
WBGene00046887	24221	21ur-2678	0.182964	-2.72001	6.03766	0.450507	0.652345	NA
WBGene00167188	35380	21ur-11626	0.182964	-2.72001	6.03766	0.450507	0.652345	NA
WBGene00008903	16038	F17A2.4	0.212796	-2.72001	6.03766	0.450507	0.652345	NA
WBGene00165192	24485	21ur-12224	0.212796	-2.72001	6.03766	0.450507	0.652345	NA
WBGene00219765	26830	linc-165	0.212796	-2.72001	6.03766	0.450507	0.652345	NA
WBGene00023327	28222	R03H4.8	0.217285	-2.72001	6.03766	0.450507	0.652345	NA
WBGene00172630	40177	21ur-10332	0.217285	-2.72001	6.03766	0.450507	0.652345	NA
WBGene00195278	42350	F46G11.7	0.217285	-2.72001	6.03766	0.450507	0.652345	NA
WBGene00006170	26981	str-119	0.23679	-2.72001	6.03766	0.450507	0.652345	NA
WBGene00021573	23925	Y45G12C.10	0.23679	-2.72001	6.03766	0.450507	0.652345	NA
WBGene00049333	31934	21ur-2910	0.232317	-2.72001	6.03766	0.450507	0.652345	NA
WBGene00023320	8416	K07E8.4	0.282548	-2.72001	6.03766	0.450507	0.652345	NA
WBGene00196058	25194	Y55F3BR.13	0.266131	-2.72001	6.03766	0.450507	0.652345	NA
WBGene00049071	31695	21ur-5407	0.302237	-2.72001	6.03766	0.450507	0.652345	NA
WBGene00167674	35826	21ur-7493	0.463366	-2.72001	6.03766	0.450507	0.652345	NA
WBGene00171068	38818	21ur-10668	0.308204	-2.72001	6.03766	0.450507	0.652345	NA
WBGene00020077	20598	R52.5	0.38647	-2.72001	6.03766	0.450507	0.652345	NA
WBGene00206393	21940	W04G5.16	0.324596	-2.72001	6.03766	0.450507	0.652345	NA
WBGene00019051	23832	srz-23	0.676208	-2.72001	6.03766	0.450507	0.652345	NA
WBGene00170377	24743	21ur-8261	0.297088	-2.72001	6.03766	0.450507	0.652345	NA
WBGene00008026	23304	scl-4	0.547437	-2.72001	6.03766	0.450507	0.652345	NA
WBGene00044203	24060	T02E9.6	0.40185	-2.72001	6.03766	0.450507	0.652345	NA
WBGene00255567	26922	mir-8212	0.37523	-2.72001	6.03766	0.450507	0.652345	NA
WBGene00000721	16475	col-148	0.425999	-2.72001	6.03766	0.450507	0.652345	NA
WBGene00219926	22443	F30A10.16	0.525111	-2.72001	6.03766	0.450507	0.652345	NA
WBGene00219969	26859	F54F11.6	0.56097	-2.72001	6.03766	0.450507	0.652345	NA
WBGene00201654	26226	K11C4.12	0.437274	-2.72001	6.03766	0.450507	0.652345	NA
WBGene00010218	14616	sre-30	0.592414	-2.72001	6.03766	0.450507	0.652345	NA
WBGene00198435	22414	T19D12.14	0.589716	-2.72001	6.03766	0.450507	0.652345	NA
WBGene00045313	28481	T27E7.12	0.600477	-2.72001	6.03766	0.450507	0.652345	NA
WBGene00165442	33851	21ur-11196	0.550384	-2.72001	6.03766	0.450507	0.652345	NA
WBGene00008942	15591	srz-34	0.725194	-2.72001	6.03766	0.450507	0.652345	NA
WBGene00010237	17107	scvp-1	0.67698	-2.72001	6.03766	0.450507	0.652345	NA
WBGene00199729	16895	ZC513.18	0.553113	-2.72001	6.03766	0.450507	0.652345	NA
WBGene00006187	98	str-138	0.705518	-2.72001	6.03766	0.450507	0.652345	NA
WBGene00174826	24982	21ur-15700	0.703341	-2.72001	6.03766	0.450507	0.652345	NA
WBGene00196964	25364	F55F3.5	0.164867	-2.72001	6.03766	0.450507	0.652345	NA
WBGene00198582	44183	F31E8.15	0.164867	-2.72001	6.03766	0.450507	0.652345	NA
WBGene00220204	16948	Y73B6A.15	0.164867	-2.72001	6.03766	0.450507	0.652345	NA
WBGene00169105	37101	21ur-8196	0.233902	-2.72001	6.03766	0.450507	0.652345	NA
WBGene00172598	21317	21ur-14715	0.214388	-2.72001	6.03766	0.450507	0.652345	NA
WBGene00046133	29064	21ur-2638	0.272179	-2.72001	6.03766	0.450507	0.652345	NA
WBGene00047351	20183	21ur-2310	0.29441	-2.72001	6.03766	0.450507	0.652345	NA
WBGene00014291	27328	C52E4.8	0.406873	-2.72001	6.03766	0.450507	0.652345	NA
WBGene00005335	23067	srh-116	0.419612	-2.72001	6.03766	0.450507	0.652345	NA
WBGene00197033	25385	T24B8.10	0.67601	-2.72001	6.03766	0.450507	0.652345	NA
WBGene00009615	23363	oac-25	0.203764	-2.72001	6.03765	0.450507	0.652345	NA
WBGene00045200	24121	smy-4	0.203764	-2.72001	6.03765	0.450507	0.652345	NA
WBGene00006281	23271	str-255	0.25742	-2.72001	6.03765	0.450507	0.652345	NA
WBGene00048712	24321	21ur-4584	0.302857	-2.72001	6.03765	0.450507	0.652345	NA
WBGene00219371	46457	C03G5.14	0.324702	-2.72001	6.03765	0.450507	0.652345	NA
WBGene00196185	42834	F28F9.9	0.311075	-2.72001	6.03765	0.450507	0.652345	NA
WBGene00206506	26395	F59A1.18	0.401949	-2.72001	6.03765	0.450507	0.652345	NA
WBGene00165404	24494	21ur-8963	0.49819	-2.72001	6.03765	0.450507	0.652345	NA
WBGene00045696	28681	21ur-2704	0.307401	-2.72001	6.03766	0.450507	0.652345	NA
WBGene00196861	25346	F41H10.36	0.307401	-2.72001	6.03766	0.450507	0.652345	NA
WBGene00206360	26385	T13C5.10	0.307401	-2.72001	6.03766	0.450507	0.652345	NA
WBGene00220072	16457	T19C3.11	0.307401	-2.72001	6.03766	0.450507	0.652345	NA
WBGene00005283	26621	srh-61	0.316377	-2.72001	6.03766	0.450507	0.652345	NA
WBGene00197493	43568	T28B11.11	0.316377	-2.72001	6.03766	0.450507	0.652345	NA
WBGene00199077	25749	K10C3.11	0.26954	-2.72001	6.03766	0.450507	0.652345	NA
WBGene00005803	26766	srw-56	0.430507	-2.72001	6.03766	0.450507	0.652345	NA
WBGene00005930	19999	srx-39	0.430507	-2.72001	6.03766	0.450507	0.652345	NA
WBGene00235165	14960	Y47D7A.18	0.47632	-2.72001	6.03766	0.450507	0.652345	NA
WBGene00021241	27911	Y22D7AL.1	0.211543	-2.72001	6.03765	0.450507	0.652345	NA
WBGene00196635	25301	F31F7.5	0.211543	-2.72001	6.03765	0.450507	0.652345	NA
WBGene00198861	25704	C02D4.8	0.211543	-2.72001	6.03765	0.450507	0.652345	NA
WBGene00200026	15430	R07D5.7	0.211543	-2.72001	6.03765	0.450507	0.652345	NA
WBGene00201203	19426	C06G1.16	0.211543	-2.72001	6.03765	0.450507	0.652345	NA
WBGene00196388	9954	T23G5.10	0.309235	-2.72001	6.03765	0.450507	0.652345	NA
WBGene00171818	7449	21ur-13877	0.372509	-2.72001	6.03765	0.450507	0.652345	NA
WBGene00013944	23577	ZK228.1	0.406927	-2.72001	6.03765	0.450507	0.652345	NA
WBGene00199829	25902	C52E4.17	0.406927	-2.72001	6.03765	0.450507	0.652345	NA
WBGene00016233	16112	srt-58	0.426165	-2.72001	6.03765	0.450507	0.652345	NA
WBGene00001918	4530	his-44	0.458358	-2.72001	6.03765	0.450507	0.652345	NA
WBGene00018107	27805	F36H5.9	0.411516	-2.72001	6.03765	0.450507	0.652345	NA
WBGene00201435	26190	C10G11.15	0.36424	-2.72001	6.03765	0.450507	0.652345	NA
WBGene00019948	23865	R08C7.4	0.407362	-2.72001	6.03765	0.450507	0.652345	NA
WBGene00050951	20671	T26H2.11	0.700004	-2.72001	6.03765	0.450507	0.652345	NA
WBGene00200820	45462	Y50D7A.17	0.76669	-2.72001	6.03765	0.450507	0.652345	NA
WBGene00005175	18017	srg-18	0.688634	-2.72001	6.03765	0.450507	0.652345	NA
WBGene00005613	19530	srj-25	0.365529	-2.72001	6.03765	0.450507	0.652345	NA
WBGene00201396	5978	R08C7.18	0.512067	-2.72001	6.03765	0.450507	0.652345	NA
WBGene00199493	25836	C07A9.15	0.518374	-2.72001	6.03765	0.450507	0.652345	NA
WBGene00047675	24264	21ur-4764	0.503959	-2.72001	6.03765	0.450507	0.652345	NA
WBGene00018826	27829	srt-34	0.61127	-2.72001	6.03765	0.450507	0.652345	NA
WBGene00220117	19447	W03B1.17	0.61127	-2.72001	6.03765	0.450507	0.652345	NA
WBGene00023271	10382	F19G12.t1	0.681454	-2.72001	6.03765	0.450507	0.652345	NA
WBGene00197722	43707	F43D9.9	0.304893	-2.72001	6.03765	0.450507	0.652345	NA
WBGene00199761	18415	C23H4.12	0.402585	-2.72001	6.03765	0.450507	0.652345	NA
WBGene00008786	23333	oac-16	0.494101	-2.72001	6.03765	0.450507	0.652345	NA
WBGene00010802	23405	srsx-39	0.555374	-2.72001	6.03765	0.450507	0.652345	NA
WBGene00018816	20586	F54D12.2	0.597309	-2.72001	6.03765	0.450507	0.652345	NA
WBGene00197560	43607	K08A2.12	0.686795	-2.72001	6.03765	0.450507	0.652345	NA
WBGene00022565	23957	ZC239.2	0.581418	-2.72001	6.03765	0.450507	0.652345	NA
WBGene00015848	23709	C16C8.10	0.6919	-2.72001	6.03765	0.450507	0.652345	NA
WBGene00005087	16501	srd-9	0.584944	-2.72	6.03765	0.450507	0.652345	NA
WBGene00018432	27811	irld-33	0.692255	-2.72	6.03765	0.450507	0.652345	NA
WBGene00005902	13051	srx-11	1.06472	-2.72	6.03765	0.450507	0.652345	NA
WBGene00219882	46556	F08B6.7	0.55383	-2.72	6.03765	0.450507	0.652345	NA
WBGene00008251	14582	srsx-30	4.43326	-2.7186	2.49487	1.08968	0.275856	0.514533
WBGene00171454	8932	21ur-6623	0.867522	-2.71001	4.29446	0.631047	0.52801	NA
WBGene00007523	23293	C11G6.2	1.71611	-2.70534	2.65177	1.0202	0.307633	NA
WBGene00010662	11654	K08E3.2	2.30114	-2.70266	2.50823	1.07752	0.281249	NA
WBGene00019314	12281	K02E7.10	43.7918	-2.70243	0.527542	5.12269	3.01211e-07	6.86655e-06
WBGene00198673	16355	Y39B6A.79	0.54478	-2.6961	5.63269	0.478652	0.632186	NA
WBGene00045163	28452	Y67A10A.14	3.03638	-2.69272	2.04154	1.31896	0.187182	NA
WBGene00235152	22947	Y7A5A.22	4.56366	-2.68897	1.98323	1.35585	0.175146	0.397311
WBGene00000562	19471	cng-1	807.823	-2.68572	0.138325	19.4161	5.64465e-84	1.11451e-80
WBGene00020236	7864	lgc-1	20.534	-2.6817	0.697631	3.84401	0.000121041	0.0015769
WBGene00012324	5222	rhy-1	1476.33	-2.68166	0.141778	18.9145	8.66084e-80	1.39912e-76
WBGene00168467	10907	21ur-9997	2.40213	-2.67422	1.99222	1.34233	0.179488	NA
WBGene00008024	16034	C39B10.4	1.26139	-2.67386	3.59229	0.744332	0.456675	NA
WBGene00045076	19823	W04G5.13	1.34146	-2.67225	3.8096	0.701454	0.48302	NA
WBGene00012618	21630	dct-10	12.0437	-2.66969	1.2557	2.12606	0.033498	0.143022
WBGene00014206	3276	nit-1	2659.75	-2.66696	0.141674	18.8246	4.74414e-79	7.02528e-76
WBGene00009024	18082	F21G4.3	3.7823	-2.66148	1.64366	1.61924	0.105395	0.293098
WBGene00014191	23586	srt-22	12.3405	-2.64801	1.11212	2.38105	0.0172635	0.0898837
WBGene00016660	9786	C45B2.3	20.1566	-2.64798	0.992249	2.66867	0.00761529	0.0495691
WBGene00015265	19189	B0563.8	6.19711	-2.64742	1.71744	1.54149	0.123198	0.32314
WBGene00196888	12421	T07D1.9	0.597784	-2.62754	5.9801	0.43938	0.660386	NA
WBGene00196162	14907	C05E11.11	0.596921	-2.62752	5.98011	0.439377	0.660388	NA
WBGene00199603	18414	F13G11.144	0.578264	-2.62752	5.98011	0.439377	0.660388	NA
WBGene00200394	20394	C38C5.3	0.55569	-2.62752	5.98011	0.439377	0.660388	NA
WBGene00019098	8341	F59B1.4	4.14395	-2.62553	1.86782	1.40566	0.159824	0.375858
WBGene00201548	17421	Y37D8A.28	3.02419	-2.62063	1.6706	1.56867	0.116724	NA
WBGene00172287	24841	21ur-12247	1.2629	-2.6188	3.04398	0.86032	0.389613	NA
WBGene00166991	5958	21ur-8849	0.976508	-2.61762	4.12779	0.634144	0.525987	NA
WBGene00006198	14544	str-151	7.91485	-2.61519	1.46488	1.78526	0.0742185	0.238817
WBGene00017666	27797	F21E9.2	6.35101	-2.61316	1.53231	1.70538	0.088124	0.263633
WBGene00013907	19665	sre-20	6.7212	-2.61312	1.5329	1.70469	0.0882523	0.263748
WBGene00005764	7071	srw-17	3.03654	-2.60935	2.52828	1.03206	0.302042	NA
WBGene00007132	3122	pals-27	75.0912	-2.60323	0.479931	5.42418	5.82221e-08	1.4951e-06
WBGene00004107	12531	pqn-16	3.60993	-2.60248	2.12826	1.22282	0.221398	0.454995
WBGene00009909	18616	F49H6.8	1.0995	-2.59232	4.74226	0.546643	0.584624	NA
WBGene00010396	22611	H13N06.2	155.999	-2.58944	0.385579	6.71571	1.87149e-11	7.77019e-10
WBGene00020472	6860	lips-11	76.3839	-2.58882	0.414689	6.24279	4.29829e-10	1.50355e-08
WBGene00011262	19121	pho-8	391.216	-2.58279	0.285243	9.05472	1.3692e-19	1.34424e-17
WBGene00201046	15938	Y67D2.8	1.08526	-2.58269	3.3816	0.763749	0.445017	NA
WBGene00015573	16659	C07G1.7	3.76913	-2.57654	2.33201	1.10486	0.269222	0.508457
WBGene00002094	11518	ins-11	21.6701	-2.57299	0.897873	2.86565	0.00416153	0.0309958
WBGene00021592	23927	Y46E12A.2	3.01197	-2.56935	1.81	1.41953	0.155745	NA
WBGene00198276	15920	T19A5.8	3.18628	-2.56318	1.85915	1.37869	0.167991	NA
WBGene00021284	18808	Y24D9A.6	4.18743	-2.55973	1.70037	1.5054	0.132222	0.336617
WBGene00045535	19348	21ur-2337	1.20244	-2.55423	3.10921	0.821503	0.41136	NA
WBGene00003545	9032	nas-27	40.4566	-2.55256	0.655466	3.89427	9.84951e-05	0.0013237
WBGene00020078	27878	R52.6	1.67815	-2.54185	2.66554	0.953594	0.340289	NA
WBGene00206462	19434	B0391.14	1.31422	-2.53901	3.48877	0.727767	0.466756	NA
WBGene00019709	27864	M01E10.3	0.351537	-2.53461	5.9735	0.424309	0.671341	NA
WBGene00001767	3033	gst-19	12.5772	-2.53407	1.08925	2.32642	0.0199959	0.0998391
WBGene00017270	23769	numr-1	17.0972	-2.53331	0.673813	3.75966	0.000170146	0.00213825
WBGene00195408	19869	F10C1.11	1.53625	-2.53221	3.36603	0.752285	0.45188	NA
WBGene00023455	17819	mir-358	1.6235	-2.52985	2.21308	1.14314	0.252981	NA
WBGene00201204	11447	F15A2.13	2.75039	-2.52903	1.70753	1.4811	0.138579	NA
WBGene00011325	7184	T01C3.11	40.235	-2.52517	0.496903	5.08181	3.73858e-07	8.40664e-06
WBGene00011112	21089	R07E5.4	702.214	-2.52478	0.251143	10.0532	8.89512e-24	1.29562e-21
WBGene00022096	922	Y69A2AR.25	44.1458	-2.52431	0.469833	5.37278	7.75304e-08	1.94868e-06
WBGene00005427	13047	srh-217	5.49737	-2.51378	1.5456	1.62641	0.103862	0.290742
WBGene00017464	11251	sulp-2	1156.85	-2.49241	0.151878	16.4106	1.60693e-60	1.20331e-57
WBGene00220249	21445	R144.19	2.61734	-2.47848	2.20446	1.1243	0.260884	NA
WBGene00006550	23279	tbx-31	5.8887	-2.47786	1.21035	2.04722	0.0406362	0.16352
WBGene00005106	7589	srd-28	10.5725	-2.47779	1.10352	2.24535	0.0247459	0.116185
WBGene00019310	11798	K02E7.5	10.3134	-2.47408	0.967265	2.5578	0.0105335	0.0630664
WBGene00019963	883	R08E5.3	921.569	-2.47201	0.176518	14.0043	1.46739e-44	5.54798e-42
WBGene00003019	6059	lin-33	3254.91	-2.47183	0.168547	14.6655	1.07194e-48	5.14823e-46
WBGene00017251	12246	fbxb-105	40.0894	-2.4618	0.571783	4.30549	1.66619e-05	0.00027415
WBGene00219693	17440	linc-144	3.37508	-2.45725	2.47312	0.993584	0.320426	0.558659
WBGene00004052	2067	parg-2	2475.49	-2.45665	0.160291	15.3261	5.11545e-53	2.84067e-50
WBGene00008184	15079	C49A1.1	2.29788	-2.43492	2.3271	1.04633	0.295407	NA
WBGene00199819	18918	K08F8.13	2.05833	-2.42849	1.96311	1.23706	0.216064	NA
WBGene00077692	12894	C08E8.10	369.112	-2.4167	0.293088	8.24565	1.64262e-16	1.19628e-14
WBGene00020791	23894	T25B6.5	3.65994	-2.41663	2.09008	1.15624	0.247583	0.485869
WBGene00009766	15608	F46B3.15	1.59304	-2.41648	2.94552	0.82039	0.411994	NA
WBGene00196747	21352	Y53G8AR.10	1.13953	-2.41305	4.48419	0.538124	0.590492	NA
WBGene00045305	4957	ZC250.4	1077.57	-2.4089	0.191526	12.5774	2.80975e-36	8.0531e-34
WBGene00016600	6317	ets-5	17.6737	-2.40858	0.780687	3.08521	0.00203409	0.017428
WBGene00005227	18530	srh-1	2.22064	-2.40237	2.06797	1.16171	0.245354	NA
WBGene00019041	18757	fbxc-22	19.1347	-2.40138	0.81662	2.94064	0.00327535	0.0257649
WBGene00235380	14963	C24D10.49	2.34077	-2.40031	2.30567	1.04105	0.297853	NA
WBGene00017912	2851	fbxb-107	28.5343	-2.39664	0.605679	3.95695	7.59128e-05	0.00104652
WBGene00015292	21136	C01C4.2	2.72945	-2.39372	2.24326	1.06707	0.285938	NA
WBGene00005579	26708	sri-67	0.920234	-2.39303	4.75464	0.503303	0.614751	NA
WBGene00014182	19671	ZK1025.2	0.745107	-2.39105	5.98649	0.399408	0.689593	NA
WBGene00015003	23676	B0034.2	0.296813	-2.39105	5.98649	0.399408	0.689593	NA
WBGene00005207	14045	srg-50	1.64009	-2.39028	2.59078	0.922613	0.356209	NA
WBGene00198890	44358	F55D1.3	1.40784	-2.38785	2.47117	0.966282	0.333903	NA
WBGene00044417	11377	C08F1.11	14.1304	-2.38713	0.992884	2.40424	0.016206	0.0858875
WBGene00016052	3781	dod-3	2342.71	-2.38624	0.370535	6.43998	1.19489e-10	4.43282e-09
WBGene00045367	15361	F17C11.15	1.39217	-2.38496	3.70044	0.644508	0.519246	NA
WBGene00009343	21572	F32H2.6	14.9576	-2.38432	0.918839	2.59493	0.00946109	0.0582265
WBGene00021169	10349	srt-40	4.09762	-2.38287	1.45521	1.63747	0.101532	0.286839
WBGene00018441	23810	math-29	1.98656	-2.3797	2.1517	1.10596	0.268743	NA
WBGene00236798	13967	F48C1.15	1.62716	-2.37952	2.55244	0.932253	0.351206	NA
WBGene00005973	23218	srx-82	1.50605	-2.3759	2.98083	0.79706	0.425416	NA
WBGene00007149	4612	B0334.13	17.6771	-2.37248	0.766902	3.09359	0.0019775	0.0170584
WBGene00008679	10603	F11A5.13	3.78013	-2.37012	2.24581	1.05535	0.291265	0.530196
WBGene00200555	12439	R153.5	1.53384	-2.36948	2.55342	0.927962	0.353427	NA
WBGene00168647	24648	21ur-7705	0.592716	-2.36827	4.68673	0.505314	0.613338	NA
WBGene00007925	8119	C34C12.6	446.97	-2.36678	0.224725	10.5319	6.15949e-26	1.01346e-23
WBGene00020667	15800	T22B2.3	2.30357	-2.36391	2.2834	1.03526	0.300548	NA
WBGene00045529	21812	21ur-3987	1.12529	-2.36272	3.24196	0.728796	0.466127	NA
WBGene00009933	8657	F52E10.2	2.4025	-2.35973	2.11834	1.11395	0.2653	NA
WBGene00269393	22952	F56H1.11	2.64792	-2.35734	2.03493	1.15844	0.246685	NA
WBGene00020669	23888	T22B2.5	3.30652	-2.35687	1.84595	1.27678	0.20168	0.432583
WBGene00017977	23423	F32B5.3	5.06711	-2.35318	1.53885	1.52918	0.12622	0.327708
WBGene00010027	23379	F54B11.4	1.83405	-2.35283	2.80432	0.839002	0.401468	NA
WBGene00077582	10900	F14H8.8	29.8046	-2.35014	0.543652	4.32288	1.54006e-05	0.000254813
WBGene00005681	5077	sru-18	3.40439	-2.34995	1.48748	1.57982	0.114148	0.308222
WBGene00195621	21872	F43H9.5	0.391894	-2.34905	5.98774	0.39231	0.694829	NA
WBGene00019442	27856	K06C4.1	0.387084	-2.34905	5.98774	0.39231	0.694829	NA
WBGene00046694	24209	21ur-5138	0.921291	-2.34484	3.58558	0.653965	0.513135	NA
WBGene00018917	21196	irld-35	1.28551	-2.34307	3.17788	0.737307	0.460936	NA
WBGene00021222	23911	irld-53	1.22504	-2.34305	3.17331	0.738361	0.460295	NA
WBGene00000679	18479	col-105	3.51272	-2.33417	2.18913	1.06626	0.286308	0.524984
WBGene00001964	20468	hlh-25	6.19927	-2.33069	1.98857	1.17204	0.241179	0.478695
WBGene00009895	198	scl-2	2102	-2.32924	0.286449	8.13144	4.24235e-16	2.93333e-14
WBGene00010297	17596	F59A1.11	8.1772	-2.3276	1.15792	2.01015	0.0444153	0.172403
WBGene00016943	18725	acdh-1	13624.4	-2.32676	0.197153	11.8018	3.81956e-32	9.04982e-30
WBGene00008965	11119	mltn-10	55.0303	-2.32609	0.568724	4.09002	4.31342e-05	0.000642494
WBGene00003863	26559	old-2	0.721262	-2.32451	3.47119	0.669657	0.503076	NA
WBGene00004838	22997	sls-2.6	1.60818	-2.32034	2.40258	0.965772	0.334158	NA
WBGene00018109	21177	fbxb-12	22.9401	-2.32013	0.712187	3.25776	0.00112296	0.010717
WBGene00195884	15903	C17E4.14	1.76557	-2.31991	2.32509	0.997772	0.31839	NA
WBGene00022642	2941	lipl-5	6534.19	-2.31908	0.312289	7.42606	1.11882e-13	5.79636e-12
WBGene00017590	10285	F19B10.11	7.2926	-2.31522	1.02612	2.25627	0.0240535	0.114134
WBGene00007648	17054	folr-1	9.70409	-2.31472	0.941371	2.45888	0.0139372	0.0769445
WBGene00022231	16738	tyr-6	1101.61	-2.3084	0.153894	15	7.34534e-51	3.83902e-48
WBGene00194935	13402	M02G9.4	13.2128	-2.30768	0.767049	3.00851	0.00262529	0.0215182
WBGene00200757	26068	D1046.15	0.424168	-2.30588	5.98906	0.385015	0.700226	NA
WBGene00168899	20239	21ur-14685	0.558111	-2.30587	5.98906	0.385013	0.700228	NA
WBGene00173423	13895	21ur-9961	0.281972	-2.30587	5.98906	0.385013	0.700228	NA
WBGene00012267	20531	W04G5.7	0.554459	-2.3058	5.74591	0.401294	0.688204	NA
WBGene00015631	14698	clec-89	53.6505	-2.30562	0.460548	5.00625	5.54999e-07	1.21908e-05
WBGene00013276	19654	sre-42	1.94843	-2.3038	2.90956	0.791804	0.428475	NA
WBGene00012893	16074	Y45F10D.15	1.60933	-2.30365	2.73762	0.841479	0.40008	NA
WBGene00008285	23314	C53D6.8	1.60347	-2.30356	2.59084	0.889119	0.373939	NA
WBGene00006927	109	vit-3	294987	-2.30273	0.419273	5.49219	3.96973e-08	1.0513e-06
WBGene00219690	17439	linc-10	2.83065	-2.30246	2.20636	1.04355	0.296692	NA
WBGene00016041	19204	C24A11.2	5.29098	-2.30159	1.29753	1.77383	0.0760917	0.242269
WBGene00020182	6853	ugt-53	343.018	-2.30084	0.246065	9.35054	8.72026e-21	9.16917e-19
WBGene00008625	11616	scl-14	3.63326	-2.30006	1.61978	1.41998	0.155613	0.370179
WBGene00014735	14200	cyp-35D2	0.783226	-2.29857	3.863	0.595022	0.551828	NA
WBGene00011873	18120	T20G5.12	3.89411	-2.29116	1.62372	1.41106	0.158227	0.373654
WBGene00023193	28162	Y74C9A.6	3.42059	-2.28937	1.66205	1.37744	0.168377	0.387698
WBGene00044978	11386	F58D2.3	5.12319	-2.28823	1.61345	1.41822	0.156127	0.370759
WBGene00048534	31217	21ur-5340	0.541892	-2.28149	5.80928	0.392732	0.694517	NA
WBGene00199655	25869	C30D11.2	0.372606	-2.28061	5.98033	0.381351	0.702943	NA
WBGene00197666	43676	C05D2.15	0.357227	-2.28061	5.98033	0.381351	0.702943	NA
WBGene00001705	7532	grd-16	17.0164	-2.27882	0.87704	2.59831	0.00936835	0.0578844
WBGene00219442	46461	C08F8.16	1.64025	-2.27468	3.70962	0.613184	0.539755	NA
WBGene00044228	24061	T03F6.7	1.1264	-2.27409	3.036	0.749042	0.453832	NA
WBGene00077616	18345	F57E7.4	4.38505	-2.27338	1.75917	1.2923	0.196253	0.426127
WBGene00015338	10716	catp-2	3263.15	-2.27246	0.920966	2.46748	0.0136068	0.0755418
WBGene00017107	21695	srt-12	1.19674	-2.27095	4.51677	0.50278	0.615119	NA
WBGene00194699	17356	Y43F8B.22	7.99656	-2.27066	0.935517	2.42717	0.0152171	0.082191
WBGene00196132	25209	C34H3.5	0.660799	-2.26767	5.87625	0.385904	0.699568	NA
WBGene00006894	22550	ver-1	24.2873	-2.2579	0.514568	4.38795	1.14423e-05	0.000194948
WBGene00007288	15061	C04A11.5	132.391	-2.25105	0.28502	7.89788	2.83697e-15	1.78769e-13
WBGene00022249	5425	Y73B6BL.28	5.51844	-2.24965	1.16877	1.92481	0.0542537	0.196718
WBGene00012320	8220	srxa-3	6.96845	-2.24909	1.03988	2.16285	0.030553	0.134388
WBGene00048866	13877	21ur-4011	1.51489	-2.24851	3.13709	0.716751	0.473528	NA
WBGene00077662	10901	T26H2.12	2.22352	-2.24469	3.02137	0.742937	0.45752	NA
WBGene00001159	14485	eff-1	439.9	-2.24221	0.224758	9.97612	1.93907e-23	2.71317e-21
WBGene00077531	17330	F40G9.15	12.0037	-2.24038	0.932239	2.40322	0.0162512	0.0860758
WBGene00201309	20411	K10D6.22	0.892383	-2.23926	3.52395	0.63544	0.525142	NA
WBGene00044164	17831	Y46G5A.39	2.88506	-2.23774	1.59173	1.40585	0.159768	NA
WBGene00235266	12460	Y77E11A.22	1.89969	-2.23419	2.26545	0.9862	0.324035	NA
WBGene00235375	19953	Y17G9A.91	2.12973	-2.23344	2.75825	0.809733	0.418094	NA
WBGene00170143	12402	21ur-8571	1.03238	-2.23255	3.15498	0.707625	0.479178	NA
WBGene00044151	17829	W04G3.12	2.74481	-2.23037	2.40401	0.927771	0.353526	NA
WBGene00044939	8916	B0412.7	5.60214	-2.2284	1.23562	1.80346	0.0713159	0.233259
WBGene00006262	23270	str-231	1.81807	-2.22671	3.39819	0.655263	0.512298	NA
WBGene00005262	19981	srh-39	2.20283	-2.22629	2.58042	0.862765	0.388267	NA
WBGene00005580	23129	sri-68	0.73431	-2.22625	5.89148	0.377877	0.705522	NA
WBGene00019368	366	K03H6.2	2277.98	-2.22291	0.175647	12.6555	1.04311e-36	3.08936e-34
WBGene00022744	15334	ZK470.1	4.71999	-2.21933	1.45194	1.52853	0.126381	0.327754
WBGene00009747	17095	F46A8.4	3.4161	-2.20926	2.44502	0.903576	0.366221	0.6004
WBGene00197517	43583	R03G5.8	0.816566	-2.20795	4.12772	0.534909	0.592713	NA
WBGene00019675	22768	K12D9.1	3.60333	-2.20545	1.91903	1.14925	0.250452	0.489024
WBGene00005687	15039	sru-24	4.37901	-2.20342	1.2841	1.71593	0.0861755	0.260299
WBGene00219979	15953	F56A12.11	3.51306	-2.19815	1.67436	1.31283	0.189241	0.417689
WBGene00022716	7408	irld-66	0.585718	-2.19728	5.69683	0.385703	0.699717	NA
WBGene00014580	4769	Y51H4A.t2	0.288731	-2.19542	5.9829	0.36695	0.713657	NA
WBGene00235343	11472	Y69A2AR.51	4.59408	-2.18695	1.32224	1.65397	0.098134	0.280948
WBGene00199674	44806	K10H10.14	0.72894	-2.18417	4.26978	0.511543	0.608971	NA
WBGene00011127	4201	fbxb-79	1.07068	-2.18324	4.07783	0.535392	0.592379	NA
WBGene00005657	94	srr-6	112.886	-2.181	0.308757	7.0638	1.62005e-12	7.65647e-11
WBGene00200151	21405	C39E6.12	2.07755	-2.1804	2.55582	0.853109	0.393599	NA
WBGene00001772	17984	gst-24	3248.66	-2.18004	0.280068	7.78398	7.02793e-15	4.20493e-13
WBGene00019300	11797	swt-1	1743.11	-2.16235	0.218858	9.88015	5.07566e-23	6.78154e-21
WBGene00011313	15139	T01B7.8	7.6252	-2.16076	0.979338	2.20635	0.0273595	0.124383
WBGene00003995	1076	pgp-1	1105.09	-2.15776	0.542765	3.97549	7.02336e-05	0.000980428
WBGene00219717	1490	anr-23	5.61314	-2.15726	1.47167	1.46586	0.142688	0.351278
WBGene00018647	1357	F49F1.7	123.438	-2.14803	0.418571	5.13181	2.86963e-07	6.57131e-06
WBGene00010058	6179	F54E4.2	11.5683	-2.14286	1.23871	1.72991	0.0836461	0.255966
WBGene00219824	26835	C18C4.17	1.94846	-2.14268	2.19823	0.974732	0.329693	NA
WBGene00010099	21587	fbxb-117	8.13584	-2.13948	1.10588	1.93465	0.0530334	0.194314
WBGene00195159	2476	T04C12.14	10.111	-2.13149	1.19576	1.78254	0.0746619	0.239614
WBGene00007946	6616	ugt-33	128.725	-2.12549	0.350662	6.06135	1.34982e-09	4.4419e-08
WBGene00007183	10570	B0462.4	13.8002	-2.12408	0.851856	2.49347	0.0126501	0.0717268
WBGene00018442	14263	sdz-18	16.8695	-2.12217	0.699441	3.0341	0.00241256	0.0200358
WBGene00019229	14275	ipla-5	27.045	-2.10739	0.843604	2.49808	0.0124867	0.0712092
WBGene00007723	13079	C25F9.2	13.6769	-2.10588	0.757546	2.77988	0.00543795	0.0382854
WBGene00019952	19757	fbxb-74	30.4655	-2.10499	0.517742	4.0657	4.78884e-05	0.000699816
WBGene00009757	22603	F46B3.2	4.80339	-2.10302	1.58536	1.32652	0.184666	0.411281
WBGene00017490	19716	pud-2.1	175.421	-2.0921	0.375614	5.56981	2.55019e-08	6.96111e-07
WBGene00008247	17564	srsx-26	4.11903	-2.09014	1.45006	1.44142	0.149467	0.360724
WBGene00005795	23174	srw-48	1.89642	-2.08827	2.93311	0.711963	0.476488	NA
WBGene00194687	3475	F57C12.6	38.2023	-2.08763	0.684725	3.04885	0.00229716	0.0192641
WBGene00016798	15235	ets-8	4.2482	-2.08499	2.31074	0.902303	0.366896	0.600953
WBGene00197405	10937	K02F6.10	1.67207	-2.07809	2.23821	0.928458	0.35317	NA
WBGene00005597	8578	srj-9	5.62015	-2.07333	1.44508	1.43475	0.151357	0.363707
WBGene00020792	11330	T25B6.6	5.9275	-2.07234	1.47838	1.40176	0.160986	0.377453
WBGene00016064	309	acd-1	620.247	-2.06936	0.148858	13.9015	6.20044e-44	2.20364e-41
WBGene00045475	9930	T07A5.7	110.976	-2.0693	0.371135	5.57559	2.46691e-08	6.76498e-07
WBGene00168375	9939	21ur-11860	1.88095	-2.06721	2.24286	0.921688	0.356691	NA
WBGene00004789	87	sgk-1	1197.12	-2.06682	0.133526	15.4788	4.82465e-54	2.8578e-51
WBGene00003377	9548	mls-2	20.6093	-2.06433	0.736558	2.80268	0.00506801	0.0362408
WBGene00196163	22897	F23H12.13	1.46353	-2.05667	2.74531	0.749158	0.453762	NA
WBGene00017233	20099	lmd-4	198.506	-2.04534	0.356661	5.73467	9.77012e-09	2.85551e-07
WBGene00001149	6512	bcat-1	12253.9	-2.04335	0.145447	14.0487	7.84265e-45	3.09698e-42
WBGene00010654	17602	K08C9.7	6.46382	-2.04119	1.09406	1.8657	0.0620837	0.214467
WBGene00014838	13723	cyp-13A9	1.63554	-2.03859	2.50317	0.814404	0.415414	NA
WBGene00013060	23541	Y51A2A.4	6.27508	-2.03859	1.77021	1.15161	0.249482	0.488045
WBGene00020277	12312	T06A1.1	11.4219	-2.03067	0.88037	2.3066	0.0210769	0.103836
WBGene00013859	19171	ZC247.1	1443.69	-2.02826	0.375133	5.40678	6.41664e-08	1.63827e-06
WBGene00002102	17000	ins-19	0.627863	-2.02768	5.2337	0.387429	0.698439	NA
WBGene00044002	24042	srt-74	1.43964	-2.02515	3.26568	0.620131	0.535171	NA
WBGene00013182	11190	Y53H1B.4	1.85073	-2.02177	3.02541	0.668262	0.503967	NA
WBGene00000659	17475	col-84	12.5218	-2.02111	0.775799	2.6052	0.00918197	0.0568713
WBGene00023472	18848	F16A11.5	8.03172	-2.02031	1.01034	1.99963	0.0455404	0.175087
WBGene00044951	20166	2RSSE.3	1.60538	-2.01993	2.91381	0.693224	0.488169	NA
WBGene00005631	11565	srj-52	8.09422	-2.01961	1.28005	1.57775	0.114622	0.308939
WBGene00003647	9039	nhr-57	630.401	-2.01419	0.152764	13.185	1.07082e-39	3.39793e-37
WBGene00006237	13564	str-204	7.25315	-2.01404	1.32845	1.51608	0.1295	0.332477
WBGene00235090	6982	C38D9.13	3.22151	-2.00805	2.3916	0.839626	0.401118	0.631344
WBGene00017308	18201	F09F9.3	50.4359	-2.00603	0.46304	4.3323	1.47562e-05	0.000244834
WBGene00020122	10814	R160.5	3.01755	-2.0032	1.76874	1.13256	0.2574	NA
WBGene00012477	16070	Y18D10A.4	0.456882	-1.99771	5.89579	0.338837	0.734733	NA
WBGene00199963	21910	T26H2.15	2.79753	-1.99541	1.94921	1.0237	0.305975	NA
WBGene00009767	21580	F46B3.16	2.30991	-1.99471	2.98421	0.668421	0.503865	NA
WBGene00000282	6990	cah-4	13624.6	-1.9914	0.0924431	21.5419	6.31321e-103	2.80464e-99
WBGene00015614	13208	C08G5.1	2.08656	-1.98976	2.68847	0.74011	0.459233	NA
WBGene00005519	15532	sri-7	2.19794	-1.98968	2.68462	0.741142	0.458607	NA
WBGene00236797	13470	Y71G12B.44	2.13545	-1.98906	2.39578	0.830234	0.406407	NA
WBGene00220046	19942	R31.7	5.21493	-1.98679	1.24519	1.59557	0.110584	0.301938
WBGene00007631	13590	wht-3	110.732	-1.98632	0.328922	6.03887	1.552e-09	5.04186e-08
WBGene00010886	12632	M7.10	1.40616	-1.98434	2.43974	0.813342	0.416022	NA
WBGene00008972	23340	F20C5.7	0.667794	-1.9833	5.89608	0.336376	0.736587	NA
WBGene00005576	23127	sri-64	0.765486	-1.98064	4.8633	0.407263	0.683815	NA
WBGene00005611	11564	srj-23	3.71353	-1.97896	1.81874	1.0881	0.276553	0.515464
WBGene00077680	11401	F54F7.10	2.14924	-1.97785	2.20772	0.89588	0.370317	NA
WBGene00198525	20367	F18A1.9	1.27226	-1.97628	3.91766	0.504455	0.613942	NA
WBGene00219302	12449	Y43F8B.28	2.16542	-1.97507	2.12413	0.929825	0.352462	NA
WBGene00196303	16304	F10C2.10	1.41033	-1.97259	3.42174	0.576488	0.564285	NA
WBGene00168743	24651	21ur-13377	1.58269	-1.96805	3.29445	0.597383	0.550252	NA
WBGene00019508	17743	K07H8.8	2.82137	-1.96625	1.90309	1.03319	0.301516	NA
WBGene00008158	11607	nhr-165	1.82901	-1.96566	2.2069	0.890686	0.373097	NA
WBGene00012086	16609	clec-144	10.4211	-1.96542	1.35837	1.44689	0.147927	0.358623
WBGene00235092	11471	C54F6.17	1.74456	-1.96432	2.73323	0.718683	0.472336	NA
WBGene00196251	20312	C27A7.10	1.32201	-1.96365	2.69192	0.729462	0.465719	NA
WBGene00005421	23099	srh-211	1.51341	-1.96249	2.62372	0.74798	0.454472	NA
WBGene00004171	15983	pqn-91	1.37079	-1.96035	2.50919	0.781269	0.434644	NA
WBGene00021198	1913	npp-26	27.9522	-1.96007	0.561984	3.48776	0.000487081	0.00533626
WBGene00255457	18959	F23C8.14	4.79692	-1.9592	1.42048	1.37925	0.167818	0.386886
WBGene00008269	13086	C53A5.11	1.89738	-1.95792	2.39256	0.818336	0.413165	NA
WBGene00194835	17359	Y17G9B.11	2.49474	-1.95242	2.16978	0.899821	0.368215	NA
WBGene00009362	23350	F33E2.6	1.41687	-1.95036	4.46076	0.437227	0.661947	NA
WBGene00005128	21501	srd-50	1.22529	-1.94854	4.04172	0.482108	0.629729	NA
WBGene00014184	23584	ZK1025.4	3.46244	-1.94779	2.01526	0.966522	0.333783	0.570869
WBGene00005702	18027	sru-39	2.99522	-1.94704	1.99223	0.977315	0.328413	NA
WBGene00019976	4371	fbxa-195	3.57108	-1.94187	1.74424	1.11331	0.265577	0.504684
WBGene00172007	15392	21ur-10500	1.08368	-1.94117	3.33587	0.581908	0.560628	NA
WBGene00005088	19007	srd-10	1.8856	-1.93914	2.84846	0.680766	0.496019	NA
WBGene00198497	25645	F10G8.12	2.90618	-1.93697	2.4749	0.782646	0.433835	NA
WBGene00009241	21570	F28H7.8	623.805	-1.93659	0.197507	9.80515	1.06986e-22	1.40825e-20
WBGene00010518	23395	K02E11.9	1.79953	-1.9322	2.44174	0.79132	0.428757	NA
WBGene00044381	7421	K10G6.5	9.09499	-1.93008	1.10641	1.74445	0.0810805	0.251098
WBGene00017500	12750	pud-2.2	146.024	-1.92933	0.398576	4.84055	1.29482e-06	2.68169e-05
WBGene00003114	15008	mab-23	2.99748	-1.92805	1.80084	1.07064	0.284331	NA
WBGene00014260	8260	ZK1321.1	5.9519	-1.92731	1.79162	1.07573	0.282047	0.521328
WBGene00005569	16001	sri-57	2.68622	-1.92729	3.0726	0.627249	0.530496	NA
WBGene00013101	270	Y51H4A.5	6.74979	-1.92696	1.34767	1.42985	0.15276	0.365659
WBGene00001310	11001	end-1	13.6637	-1.92258	1.0076	1.90807	0.0563816	0.201428
WBGene00169862	14380	21ur-10289	0.41125	-1.9199	6.00277	0.319835	0.749093	NA
WBGene00169226	24681	21ur-8684	0.361678	-1.9199	6.00277	0.319835	0.749093	NA
WBGene00049177	24339	21ur-3104	0.451063	-1.91989	6.00277	0.319834	0.749094	NA
WBGene00170658	17345	21ur-10998	0.376437	-1.91941	5.3238	0.360535	0.718447	NA
WBGene00005717	6575	srv-6	3.43729	-1.91913	1.81895	1.05508	0.291389	0.530368
WBGene00199251	25780	F46F2.10	0.612829	-1.91883	4.74057	0.404768	0.685648	NA
WBGene00000560	22960	cnc-6	4.16362	-1.91598	1.6044	1.19421	0.232398	0.468961
WBGene00045180	12883	K07F5.17	6.82105	-1.91378	1.1139	1.71809	0.08578	0.259589
WBGene00021174	18265	fbxb-99	5.89112	-1.91151	1.38398	1.38117	0.167226	0.386152
WBGene00010067	18619	dot-1.2	13.067	-1.91082	1.13655	1.68125	0.0927145	0.271692
WBGene00008760	14593	F13E9.11	414.697	-1.90606	0.185187	10.2926	7.60682e-25	1.18573e-22
WBGene00172849	20721	21ur-15315	1.3012	-1.90446	3.51904	0.541188	0.588378	NA
WBGene00019319	10317	K02E10.5	11.2465	-1.90391	0.935043	2.03617	0.0417328	0.166106
WBGene00001773	14005	gst-25	11.8972	-1.90095	0.877601	2.16608	0.030305	0.133595
WBGene00044948	21802	K11H12.12	1.1251	-1.89162	3.2653	0.579308	0.562381	NA
WBGene00196820	14409	F46C8.11	0.457505	-1.89128	6.00394	0.315007	0.752756	NA
WBGene00196780	17374	C17E4.15	0.448785	-1.89127	6.00394	0.315005	0.752758	NA
WBGene00049340	12886	21ur-3203	0.49949	-1.89127	5.88055	0.321614	0.747745	NA
WBGene00011552	20524	T06H11.2	5.72227	-1.89104	1.50979	1.25251	0.210382	0.442216
WBGene00201748	18425	F40H3.16	0.575403	-1.89084	4.13832	0.456911	0.647735	NA
WBGene00220147	26885	Y40B1A.6	1.18329	-1.89055	2.96649	0.6373	0.523929	NA
WBGene00017927	7823	F29C4.4	6.17296	-1.88994	1.28228	1.47389	0.140511	0.34863
WBGene00019482	19751	K07C11.10	6.76506	-1.88953	1.12803	1.67508	0.0939184	0.2736
WBGene00004989	90	spp-4	802.737	-1.88739	0.297518	6.3438	2.2416e-10	8.07975e-09
WBGene00013498	23413	Y70G10A.2	17.3816	-1.88701	0.735589	2.5653	0.0103087	0.0620547
WBGene00008069	16556	C43D7.7	5.69129	-1.87825	1.58423	1.1856	0.235782	0.472146
WBGene00045242	21809	C05B5.11	4.28652	-1.87781	1.59186	1.17963	0.238148	0.475172
WBGene00007515	645	C10C6.7	268.081	-1.87441	0.213088	8.7964	1.41278e-18	1.29408e-16
WBGene00206524	18938	C54E10.11	2.63424	-1.8737	2.37168	0.790028	0.429512	NA
WBGene00021525	22804	Y41D4B.26	15.9299	-1.86806	0.988408	1.88997	0.0587618	0.206608
WBGene00018693	20583	F52E1.3	0.627875	-1.868	5.48765	0.340401	0.733555	NA
WBGene00018842	12781	F54H12.2	4.7193	-1.86581	1.74107	1.07165	0.283879	0.522842
WBGene00202020	26293	F52B10.21	0.240765	-1.86516	5.99441	0.31115	0.755687	NA
WBGene00006611	9077	tre-5	279.033	-1.86328	0.216963	8.588	8.85001e-18	7.4533e-16
WBGene00010172	18623	oac-36	1.51761	-1.86225	3.26877	0.569709	0.568875	NA
WBGene00043061	24037	Y54G2A.38	3.31509	-1.86164	1.93677	0.961212	0.336446	0.573491
WBGene00008319	5624	C54G10.1	15.3234	-1.85747	0.796542	2.33192	0.019705	0.0988868
WBGene00195148	19381	W02B12.16	0.925394	-1.85445	4.89233	0.379053	0.704648	NA
WBGene00044034	19809	Y38E10A.28	90.9033	-1.85369	0.395712	4.68445	2.8071e-06	5.42198e-05
WBGene00019404	5366	K05B2.4	1459.04	-1.85289	0.186503	9.93494	2.93364e-23	4.04115e-21
WBGene00010759	15622	cysl-2	4804.81	-1.85125	0.105294	17.5817	3.40382e-69	3.78036e-66
WBGene00008796	16566	F14D7.9	1.98589	-1.85115	2.27497	0.813705	0.415814	NA
WBGene00194784	17358	T11F9.22	2.49706	-1.84968	2.33508	0.792128	0.428286	NA
WBGene00017677	2344	asp-11	10.5789	-1.84893	1.08423	1.70529	0.0881399	0.263633
WBGene00018377	23807	hum-10	1.34154	-1.84139	2.77277	0.664098	0.506628	NA
WBGene00020648	4381	T21D12.7	8.38388	-1.83852	1.06449	1.72714	0.0841433	0.256868
WBGene00018766	8331	F53G2.1	25.2335	-1.83626	0.717971	2.55757	0.0105408	0.0630884
WBGene00019874	5374	R05C11.2	5.13608	-1.83241	1.79909	1.01852	0.308431	0.546769
WBGene00016832	21686	sre-49	1.129	-1.83002	4.02959	0.454144	0.649725	NA
WBGene00021289	17263	Y25C1A.2	2.86266	-1.82814	2.56509	0.712697	0.476033	NA
WBGene00011339	15140	T01G5.1	895.067	-1.82783	0.163473	11.1812	5.03865e-29	9.83921e-27
WBGene00013313	6726	Y57G11C.18	3.52329	-1.82775	1.4354	1.27334	0.202898	0.434144
WBGene00018179	21715	F38E1.6	1.67616	-1.82394	2.36126	0.772444	0.439852	NA
WBGene00004728	8063	sax-2	9492.31	-1.82084	0.313924	5.80027	6.62065e-09	1.98396e-07
WBGene00022755	14820	nhr-250	7.9377	-1.82007	1.13113	1.60907	0.107601	0.296444
WBGene00010071	12121	sre-45	3.05968	-1.81999	1.98641	0.916222	0.359551	NA
WBGene00022181	1938	pho-9	1793.03	-1.81988	0.191527	9.50196	2.0597e-21	2.37669e-19
WBGene00171265	24778	21ur-10517	0.918385	-1.81554	4.1331	0.439267	0.660468	NA
WBGene00005537	11054	sri-25	1.62404	-1.81081	3.05061	0.593588	0.552788	NA
WBGene00044942	28372	F54E7.11	3.68482	-1.80736	1.21805	1.48382	0.137857	0.344982
WBGene00006731	14064	uev-2	26.3241	-1.80353	0.597784	3.01703	0.00255265	0.0210295
WBGene00022658	23962	srh-188	1.44902	-1.8029	3.80434	0.473906	0.635567	NA
WBGene00017790	10772	F25E5.9	1.30481	-1.80205	3.62913	0.496552	0.619505	NA
WBGene00195895	25166	T14G11.4	1.1573	-1.79877	4.17868	0.430463	0.666859	NA
WBGene00017528	14245	F16G10.14	0.643544	-1.79664	6.11616	0.293754	0.768946	NA
WBGene00196389	20316	Y65B4BL.9	0.791414	-1.79664	6.11616	0.293752	0.768947	NA
WBGene00014881	27658	Y39B6A.t7	0.44195	-1.79664	6.11616	0.293752	0.768947	NA
WBGene00201515	45846	K01A6.20	0.342857	-1.79663	6.11616	0.293752	0.768947	NA
WBGene00174999	42253	21ur-13055	0.491605	-1.79663	6.11616	0.293752	0.768948	NA
WBGene00198296	44031	H34C03.19	0.414127	-1.79663	6.11616	0.293752	0.768948	NA
WBGene00171510	24791	21ur-8213	0.396335	-1.79663	6.11616	0.293752	0.768948	NA
WBGene00003337	14019	mir-243	0.457689	-1.79663	6.11616	0.293751	0.768948	NA
WBGene00169212	21304	21ur-12292	0.461462	-1.79663	6.11616	0.293751	0.768949	NA
WBGene00045364	19345	clec-250	0.537757	-1.79662	6.11616	0.29375	0.768949	NA
WBGene00199652	14429	C41G11.15	0.397814	-1.79662	6.11616	0.29375	0.768949	NA
WBGene00046147	29077	21ur-3223	0.442358	-1.79662	6.11616	0.29375	0.768949	NA
WBGene00014880	16646	Y39B6A.t6	0.23395	-1.79662	6.11616	0.29375	0.768949	NA
WBGene00022973	20137	E01H11.t1	0.23395	-1.79662	6.11616	0.29375	0.768949	NA
WBGene00201630	16919	C28F5.7	0.23395	-1.79662	6.11616	0.29375	0.768949	NA
WBGene00077708	20215	mir-1817	0.550273	-1.79662	6.11616	0.29375	0.768949	NA
WBGene00019857	27870	R03H10.5	0.303702	-1.79662	6.11616	0.29375	0.768949	NA
WBGene00170397	24744	21ur-15259	0.297436	-1.79662	6.11616	0.29375	0.768949	NA
WBGene00201073	45603	F54H5.9	0.398216	-1.79662	6.11616	0.293749	0.76895	NA
WBGene00171712	16812	21ur-13554	0.457467	-1.79661	6.11616	0.293748	0.76895	NA
WBGene00255611	20454	Y116A8C.470	0.209812	-1.79661	6.11616	0.293748	0.76895	NA
WBGene00013617	27279	fbxa-204	0.358375	-1.79661	6.11616	0.293748	0.76895	NA
WBGene00077606	20675	C06C6.10	0.219549	-1.79661	6.11616	0.293748	0.76895	NA
WBGene00000025	19463	abu-2	0.517038	-1.79661	6.11616	0.293748	0.768951	NA
WBGene00219751	17441	anr-24	0.418127	-1.79661	6.11616	0.293748	0.768951	NA
WBGene00046724	29603	21ur-486	0.322884	-1.79661	6.11616	0.293748	0.768951	NA
WBGene00018382	20107	F43C11.5	0.370779	-1.79661	6.11616	0.293748	0.768951	NA
WBGene00196180	19881	T19D2.6	0.337564	-1.79661	6.11616	0.293748	0.768951	NA
WBGene00048443	31132	21ur-3468	0.263468	-1.79661	6.11616	0.293748	0.768951	NA
WBGene00014967	23673	Y113G7A.2	0.307754	-1.79661	6.11616	0.293748	0.768951	NA
WBGene00197406	25442	K02A4.5	0.202034	-1.79661	6.11616	0.293748	0.768951	NA
WBGene00046284	29199	21ur-5242	0.148378	-1.79661	6.11616	0.293748	0.768951	NA
WBGene00202282	16924	K09A9.11	0.148378	-1.79661	6.11616	0.293748	0.768951	NA
WBGene00046974	29826	21ur-469	0.266934	-1.79661	6.11616	0.293748	0.768951	NA
WBGene00201936	26276	K10D6.24	0.25569	-1.79661	6.11616	0.293748	0.768951	NA
WBGene00219227	19927	mir-4932	0.25088	-1.79661	6.11616	0.293748	0.768951	NA
WBGene00050629	17327	21ur-632	0.417117	-1.7966	6.11616	0.293746	0.768952	NA
WBGene00050032	32570	21ur-4921	0.204086	-1.7966	6.11616	0.293746	0.768952	NA
WBGene00202017	12444	F36H1.16	0.379257	-1.7966	6.11616	0.293746	0.768952	NA
WBGene00015681	22692	C10G8.2	0.172874	-1.7966	6.11616	0.293746	0.768952	NA
WBGene00166377	24553	21ur-10793	0.109482	-1.7966	6.11616	0.293746	0.768952	NA
WBGene00196176	21877	T28B11.7	0.109482	-1.7966	6.11616	0.293746	0.768952	NA
WBGene00198593	44190	K08A8.16	0.109482	-1.7966	6.11616	0.293746	0.768952	NA
WBGene00199856	44910	F08F1.18	0.109482	-1.7966	6.11616	0.293746	0.768952	NA
WBGene00169669	37589	21ur-5982	0.328112	-1.7966	6.11616	0.293746	0.768952	NA
WBGene00048940	24332	21ur-3194	0.325055	-1.7966	6.11616	0.293746	0.768952	NA
WBGene00170432	38260	21ur-15031	0.412177	-1.7966	6.11616	0.293746	0.768952	NA
WBGene00171823	24811	21ur-9380	0.161899	-1.79658	6.11617	0.293743	0.768954	NA
WBGene00077709	24461	mir-1822	0.157411	-1.79658	6.11617	0.293743	0.768954	NA
WBGene00196282	25240	F46G11.10	0.157411	-1.79658	6.11617	0.293743	0.768954	NA
WBGene00199201	44535	Y71F9AL.19	0.157411	-1.79658	6.11617	0.293743	0.768954	NA
WBGene00005738	22527	srv-27	0.762242	-1.79658	6.11617	0.293743	0.768954	NA
WBGene00046890	13372	21ur-5250	0.399245	-1.79658	6.11617	0.293743	0.768954	NA
WBGene00199384	44637	F41E7.15	0.44454	-1.79658	6.11617	0.293743	0.768954	NA
WBGene00195832	42644	T28B11.5	0.540316	-1.79658	6.11617	0.293743	0.768954	NA
WBGene00174322	24957	21ur-14519	0.259912	-1.79658	6.11617	0.293743	0.768954	NA
WBGene00198309	44038	F35D2.11	0.265647	-1.79658	6.11617	0.293743	0.768954	NA
WBGene00168180	21297	21ur-11837	0.176424	-1.79658	6.11617	0.293743	0.768954	NA
WBGene00167454	35623	21ur-15110	0.206931	-1.79658	6.11617	0.293743	0.768954	NA
WBGene00194669	16278	ZK1251.15	0.127578	-1.79658	6.11617	0.293743	0.768954	NA
WBGene00197587	20785	F38B7.14	0.246005	-1.79658	6.11617	0.293743	0.768954	NA
WBGene00200594	7468	B0350.76	0.165983	-1.79658	6.11617	0.293743	0.768954	NA
WBGene00170055	24725	21ur-8551	0.116462	-1.79658	6.11617	0.293743	0.768954	NA
WBGene00195527	42473	C09D8.3	0.116462	-1.79658	6.11617	0.293743	0.768954	NA
WBGene00196536	25288	H24G06.2	0.116462	-1.79658	6.11617	0.293743	0.768954	NA
WBGene00196742	43157	T01B6.6	0.116462	-1.79658	6.11617	0.293743	0.768954	NA
WBGene00198176	43969	E02C12.15	0.116462	-1.79658	6.11617	0.293743	0.768954	NA
WBGene00220002	19939	K02F6.11	0.126199	-1.79658	6.11617	0.293743	0.768954	NA
WBGene00015825	18181	C16C4.1	0.791516	-1.79658	6.11617	0.293743	0.768954	NA
WBGene00220252	17449	C02F4.12	0.435483	-1.79658	6.11617	0.293743	0.768954	NA
WBGene00049326	31928	21ur-1588	0.416464	-1.79658	6.11617	0.293743	0.768954	NA
WBGene00196948	43262	F08C6.11	0.404712	-1.79658	6.11617	0.293743	0.768954	NA
WBGene00219786	20932	B0365.10	0.459177	-1.79658	6.11617	0.293743	0.768954	NA
WBGene00046321	29236	21ur-3611	0.277429	-1.79658	6.11617	0.293743	0.768954	NA
WBGene00050038	16204	21ur-2571	0.304683	-1.79658	6.11617	0.293743	0.768954	NA
WBGene00196644	25303	K08H10.15	0.360084	-1.79658	6.11617	0.293743	0.768954	NA
WBGene00220044	46634	R13G10.5	0.338945	-1.79658	6.11617	0.293743	0.768954	NA
WBGene00166573	16225	21ur-5856	0.223773	-1.79658	6.11617	0.293743	0.768954	NA
WBGene00171264	13393	21ur-8765	0.223773	-1.79658	6.11617	0.293743	0.768954	NA
WBGene00198470	25641	F08G2.15	0.223773	-1.79658	6.11617	0.293743	0.768954	NA
WBGene00197711	25493	Y32F6B.6	0.209345	-1.79658	6.11617	0.293743	0.768954	NA
WBGene00165769	34140	21ur-7311	0.17572	-1.79658	6.11617	0.293743	0.768954	NA
WBGene00009169	18083	F26F2.4	0.260991	-1.79658	6.11617	0.293743	0.768954	NA
WBGene00005778	26755	srw-31	0.192349	-1.79658	6.11617	0.293743	0.768954	NA
WBGene00044430	13353	T23F4.5	0.192349	-1.79658	6.11617	0.293743	0.768954	NA
WBGene00165873	34228	21ur-12787	0.192349	-1.79658	6.11617	0.293743	0.768954	NA
WBGene00174088	24948	21ur-14524	0.192349	-1.79658	6.11617	0.293743	0.768954	NA
WBGene00166811	24581	21ur-8662	0.170118	-1.79658	6.11617	0.293743	0.768954	NA
WBGene00173831	41227	21ur-14765	0.170118	-1.79658	6.11617	0.293743	0.768954	NA
WBGene00197245	43427	EGAP1.4	0.165308	-1.79658	6.11617	0.293743	0.768954	NA
WBGene00173607	41034	21ur-13391	0.183745	-1.79658	6.11617	0.293743	0.768954	NA
WBGene00196480	20320	C27A12.11	0.160499	-1.79658	6.11617	0.293743	0.768954	NA
WBGene00200920	45516	F29F11.15	0.160499	-1.79658	6.11617	0.293743	0.768954	NA
WBGene00003273	13012	mir-45	0.20231	-1.79658	6.11617	0.293743	0.768954	NA
WBGene00049863	32412	21ur-3125	0.20231	-1.79658	6.11617	0.293743	0.768954	NA
WBGene00189986	14890	C53D6.16	0.20231	-1.79658	6.11617	0.293743	0.768954	NA
WBGene00201648	26223	C18F3.12	0.20231	-1.79658	6.11617	0.293743	0.768954	NA
WBGene00010417	23394	clpr-3	0.132558	-1.79658	6.11617	0.293743	0.768954	NA
WBGene00046527	24195	21ur-4795	0.132558	-1.79658	6.11617	0.293743	0.768954	NA
WBGene00200359	45185	F18E2.13	0.132558	-1.79658	6.11617	0.293743	0.768954	NA
WBGene00219816	16452	C14E2.12	0.132558	-1.79658	6.11617	0.293743	0.768954	NA
WBGene00002096	26473	ins-13	0.0628064	-1.79658	6.11617	0.293743	0.768954	NA
WBGene00004833	26569	sls-2.1	0.0628064	-1.79658	6.11617	0.293743	0.768954	NA
WBGene00005595	23133	srj-7	0.0628064	-1.79658	6.11617	0.293743	0.768954	NA
WBGene00005730	26739	srv-19	0.0628064	-1.79658	6.11617	0.293743	0.768954	NA
WBGene00017863	27802	F27D9.4	0.0628064	-1.79658	6.11617	0.293743	0.768954	NA
WBGene00022995	28024	F18C5.t1	0.0628064	-1.79658	6.11617	0.293743	0.768954	NA
WBGene00023031	28050	F37A4.t1	0.0628064	-1.79658	6.11617	0.293743	0.768954	NA
WBGene00023144	28128	T22F3.t2	0.0628064	-1.79658	6.11617	0.293743	0.768954	NA
WBGene00023194	28163	Y75D11A.t2	0.0628064	-1.79658	6.11617	0.293743	0.768954	NA
WBGene00023257	10381	C50A2.t2	0.0628064	-1.79658	6.11617	0.293743	0.768954	NA
WBGene00045506	28517	F57G4.10	0.0628064	-1.79658	6.11617	0.293743	0.768954	NA
WBGene00045780	24156	21ur-1878	0.0628064	-1.79658	6.11617	0.293743	0.768954	NA
WBGene00046202	24184	21ur-4236	0.0628064	-1.79658	6.11617	0.293743	0.768954	NA
WBGene00046408	29317	21ur-1525	0.0628064	-1.79658	6.11617	0.293743	0.768954	NA
WBGene00046680	29564	21ur-57	0.0628064	-1.79658	6.11617	0.293743	0.768954	NA
WBGene00046783	24214	21ur-47	0.0628064	-1.79658	6.11617	0.293743	0.768954	NA
WBGene00046953	29808	21ur-1484	0.0628064	-1.79658	6.11617	0.293743	0.768954	NA
WBGene00047298	30113	21ur-2064	0.0628064	-1.79658	6.11617	0.293743	0.768954	NA
WBGene00047428	30237	21ur-5046	0.0628064	-1.79658	6.11617	0.293743	0.768954	NA
WBGene00047472	30274	21ur-3129	0.0628064	-1.79658	6.11617	0.293743	0.768954	NA
WBGene00047693	24265	21ur-2656	0.0628064	-1.79658	6.11617	0.293743	0.768954	NA
WBGene00047695	30478	21ur-2855	0.0628064	-1.79658	6.11617	0.293743	0.768954	NA
WBGene00048030	30772	21ur-4609	0.0628064	-1.79658	6.11617	0.293743	0.768954	NA
WBGene00048327	31032	21ur-3044	0.0628064	-1.79658	6.11617	0.293743	0.768954	NA
WBGene00048451	31138	21ur-4919	0.0628064	-1.79658	6.11617	0.293743	0.768954	NA
WBGene00048731	31385	21ur-3646	0.0628064	-1.79658	6.11617	0.293743	0.768954	NA
WBGene00048885	31526	21ur-1055	0.0628064	-1.79658	6.11617	0.293743	0.768954	NA
WBGene00049043	31671	21ur-4072	0.0628064	-1.79658	6.11617	0.293743	0.768954	NA
WBGene00049299	31903	21ur-602	0.0628064	-1.79658	6.11617	0.293743	0.768954	NA
WBGene00050773	24421	21ur-4507	0.0628064	-1.79658	6.11617	0.293743	0.768954	NA
WBGene00050826	33284	21ur-4455	0.0628064	-1.79658	6.11617	0.293743	0.768954	NA
WBGene00077565	33394	W07G4.7	0.0628064	-1.79658	6.11617	0.293743	0.768954	NA
WBGene00165523	33921	21ur-7686	0.0628064	-1.79658	6.11617	0.293743	0.768954	NA
WBGene00166320	34608	21ur-6840	0.0628064	-1.79658	6.11617	0.293743	0.768954	NA
WBGene00166513	34775	21ur-9018	0.0628064	-1.79658	6.11617	0.293743	0.768954	NA
WBGene00167632	24610	21ur-8722	0.0628064	-1.79658	6.11617	0.293743	0.768954	NA
WBGene00167996	36115	21ur-9527	0.0628064	-1.79658	6.11617	0.293743	0.768954	NA
WBGene00168749	36793	21ur-15369	0.0628064	-1.79658	6.11617	0.293743	0.768954	NA
WBGene00168941	36960	21ur-15028	0.0628064	-1.79658	6.11617	0.293743	0.768954	NA
WBGene00169010	37021	21ur-8524	0.0628064	-1.79658	6.11617	0.293743	0.768954	NA
WBGene00169074	37071	21ur-8052	0.0628064	-1.79658	6.11617	0.293743	0.768954	NA
WBGene00169159	37149	21ur-8981	0.0628064	-1.79658	6.11617	0.293743	0.768954	NA
WBGene00169210	37193	21ur-15593	0.0628064	-1.79658	6.11617	0.293743	0.768954	NA
WBGene00169434	37391	21ur-8265	0.0628064	-1.79658	6.11617	0.293743	0.768954	NA
WBGene00169554	24704	21ur-6661	0.0628064	-1.79658	6.11617	0.293743	0.768954	NA
WBGene00170390	38224	21ur-15046	0.0628064	-1.79658	6.11617	0.293743	0.768954	NA
WBGene00170446	38273	21ur-12120	0.0628064	-1.79658	6.11617	0.293743	0.768954	NA
WBGene00170983	24766	21ur-10679	0.0628064	-1.79658	6.11617	0.293743	0.768954	NA
WBGene00171425	39129	21ur-14503	0.0628064	-1.79658	6.11617	0.293743	0.768954	NA
WBGene00172161	39775	21ur-12084	0.0628064	-1.79658	6.11617	0.293743	0.768954	NA
WBGene00172258	39856	21ur-9119	0.0628064	-1.79658	6.11617	0.293743	0.768954	NA
WBGene00172681	40221	21ur-7411	0.0628064	-1.79658	6.11617	0.293743	0.768954	NA
WBGene00172766	40292	21ur-9325	0.0628064	-1.79658	6.11617	0.293743	0.768954	NA
WBGene00173000	40502	21ur-13175	0.0628064	-1.79658	6.11617	0.293743	0.768954	NA
WBGene00173906	41295	21ur-8970	0.0628064	-1.79658	6.11617	0.293743	0.768954	NA
WBGene00174319	41659	21ur-6618	0.0628064	-1.79658	6.11617	0.293743	0.768954	NA
WBGene00174382	41713	21ur-11892	0.0628064	-1.79658	6.11617	0.293743	0.768954	NA
WBGene00174529	41837	21ur-7290	0.0628064	-1.79658	6.11617	0.293743	0.768954	NA
WBGene00174576	24972	21ur-10574	0.0628064	-1.79658	6.11617	0.293743	0.768954	NA
WBGene00175006	42260	21ur-12105	0.0628064	-1.79658	6.11617	0.293743	0.768954	NA
WBGene00194999	25025	B0205.15	0.0628064	-1.79658	6.11617	0.293743	0.768954	NA
WBGene00195304	42366	ZC53.8	0.0628064	-1.79658	6.11617	0.293743	0.768954	NA
WBGene00195422	21870	Y111B2A.31	0.0628064	-1.79658	6.11617	0.293743	0.768954	NA
WBGene00195538	15900	M79.6	0.0628064	-1.79658	6.11617	0.293743	0.768954	NA
WBGene00195907	25167	T14F9.7	0.0628064	-1.79658	6.11617	0.293743	0.768954	NA
WBGene00195941	42710	F55B12.13	0.0628064	-1.79658	6.11617	0.293743	0.768954	NA
WBGene00196090	25199	F02G3.2	0.0628064	-1.79658	6.11617	0.293743	0.768954	NA
WBGene00196441	42979	K01A6.12	0.0628064	-1.79658	6.11617	0.293743	0.768954	NA
WBGene00196623	25299	F09C8.4	0.0628064	-1.79658	6.11617	0.293743	0.768954	NA
WBGene00196630	43096	F09D5.1	0.0628064	-1.79658	6.11617	0.293743	0.768954	NA
WBGene00197272	25424	C18F3.7	0.0628064	-1.79658	6.11617	0.293743	0.768954	NA
WBGene00197612	43641	Y53F4B.56	0.0628064	-1.79658	6.11617	0.293743	0.768954	NA
WBGene00197815	25513	F56A11.10	0.0628064	-1.79658	6.11617	0.293743	0.768954	NA
WBGene00198035	43890	Y41C4A.26	0.0628064	-1.79658	6.11617	0.293743	0.768954	NA
WBGene00198054	43902	B0495.17	0.0628064	-1.79658	6.11617	0.293743	0.768954	NA
WBGene00198355	44065	F28C1.12	0.0628064	-1.79658	6.11617	0.293743	0.768954	NA
WBGene00198430	18404	F08G5.14	0.0628064	-1.79658	6.11617	0.293743	0.768954	NA
WBGene00198471	44126	C43D7.15	0.0628064	-1.79658	6.11617	0.293743	0.768954	NA
WBGene00198650	17909	Y97E10AL.4	0.0628064	-1.79658	6.11617	0.293743	0.768954	NA
WBGene00198843	21389	T25F10.11	0.0628064	-1.79658	6.11617	0.293743	0.768954	NA
WBGene00198962	10941	C14F11.20	0.0628064	-1.79658	6.11617	0.293743	0.768954	NA
WBGene00199013	25736	Y87G2A.22	0.0628064	-1.79658	6.11617	0.293743	0.768954	NA
WBGene00199157	44503	ZK945.12	0.0628064	-1.79658	6.11617	0.293743	0.768954	NA
WBGene00199763	25890	C56G3.4	0.0628064	-1.79658	6.11617	0.293743	0.768954	NA
WBGene00199928	44948	F52F12.16	0.0628064	-1.79658	6.11617	0.293743	0.768954	NA
WBGene00199983	13933	T04C12.25	0.0628064	-1.79658	6.11617	0.293743	0.768954	NA
WBGene00200264	45138	W10C8.14	0.0628064	-1.79658	6.11617	0.293743	0.768954	NA
WBGene00200493	45271	K03H9.12	0.0628064	-1.79658	6.11617	0.293743	0.768954	NA
WBGene00200522	26027	R04F11.23	0.0628064	-1.79658	6.11617	0.293743	0.768954	NA
WBGene00201119	45624	W01A11.15	0.0628064	-1.79658	6.11617	0.293743	0.768954	NA
WBGene00201363	22425	Y73F8A.1171	0.0628064	-1.79658	6.11617	0.293743	0.768954	NA
WBGene00201642	16423	C08B11.13	0.0628064	-1.79658	6.11617	0.293743	0.768954	NA
WBGene00201842	46043	Y40C5A.23	0.0628064	-1.79658	6.11617	0.293743	0.768954	NA
WBGene00202102	16921	D1053.7	0.0628064	-1.79658	6.11617	0.293743	0.768954	NA
WBGene00202160	46213	K08A8.30	0.0628064	-1.79658	6.11617	0.293743	0.768954	NA
WBGene00202332	20921	C05B10.21	0.0628064	-1.79658	6.11617	0.293743	0.768954	NA
WBGene00202445	46379	K11D9.8	0.0628064	-1.79658	6.11617	0.293743	0.768954	NA
WBGene00202465	46392	W01A11.20	0.0628064	-1.79658	6.11617	0.293743	0.768954	NA
WBGene00219933	46577	F35D11.12	0.0628064	-1.79658	6.11617	0.293743	0.768954	NA
WBGene00235162	46755	B0361.13	0.0628064	-1.79658	6.11617	0.293743	0.768954	NA
WBGene00199866	16379	H37A05.6	0.758514	-1.79658	6.11617	0.293743	0.768955	NA
WBGene00166372	19363	21ur-14887	0.431794	-1.79658	6.11617	0.293743	0.768955	NA
WBGene00020243	18247	T05B4.12	0.519305	-1.79658	6.11617	0.293743	0.768955	NA
WBGene00010394	27139	srz-59	0.488353	-1.79658	6.11617	0.293743	0.768955	NA
WBGene00202294	20429	C54G7.16	0.406972	-1.79658	6.11617	0.293743	0.768955	NA
WBGene00196560	43057	C35C5.14	0.538916	-1.79658	6.11617	0.293743	0.768955	NA
WBGene00021100	18264	W08F4.11	0.348507	-1.79658	6.11617	0.293743	0.768955	NA
WBGene00219703	18945	anr-38	0.405879	-1.79658	6.11617	0.293743	0.768955	NA
WBGene00005167	23028	srg-9	0.619352	-1.79658	6.11617	0.293743	0.768955	NA
WBGene00046714	29595	21ur-3254	0.269159	-1.79658	6.11617	0.293743	0.768955	NA
WBGene00200506	45278	ZC123.9	0.282786	-1.79658	6.11617	0.293743	0.768955	NA
WBGene00168081	36192	21ur-13320	0.23987	-1.79658	6.11617	0.293743	0.768955	NA
WBGene00201746	12442	F15A8.16	0.220968	-1.79658	6.11617	0.293743	0.768955	NA
WBGene00173505	24913	21ur-15575	0.251156	-1.79658	6.11617	0.293743	0.768955	NA
WBGene00220033	19941	M18.11	0.24187	-1.79658	6.11617	0.293743	0.768955	NA
WBGene00045378	14364	H04D03.5	0.123275	-1.79658	6.11617	0.293743	0.768955	NA
WBGene00049352	24349	21ur-4157	0.111652	-1.79658	6.11617	0.293743	0.768955	NA
WBGene00172371	39956	21ur-15292	0.111652	-1.79658	6.11617	0.293743	0.768955	NA
WBGene00219221	46427	mir-5551	0.111652	-1.79658	6.11617	0.293743	0.768955	NA
WBGene00219772	5485	anr-53	0.111652	-1.79658	6.11617	0.293743	0.768955	NA
WBGene00167306	35486	21ur-6444	0.112327	-1.79658	6.11617	0.293743	0.768955	NA
WBGene00173637	41062	21ur-10052	0.112327	-1.79658	6.11617	0.293743	0.768955	NA
WBGene00196204	21879	B0379.9	0.331632	-1.79657	6.11617	0.293741	0.768956	NA
WBGene00195815	25149	H08J11.3	0.280107	-1.79657	6.11617	0.293741	0.768956	NA
WBGene00202397	26360	ZK377.14	0.193027	-1.79657	6.11617	0.293741	0.768956	NA
WBGene00003657	15507	nhr-67	134.23	-1.79649	0.329082	5.45909	4.78585e-08	1.25806e-06
WBGene00023273	24011	F23C8.2	0.95776	-1.79628	5.98451	0.300155	0.764059	NA
WBGene00007571	19566	C14A6.7	0.492053	-1.79618	5.95409	0.301672	0.762902	NA
WBGene00196753	20769	W06B11.6	0.518291	-1.79605	5.9176	0.30351	0.761501	NA
WBGene00171174	14875	21ur-11007	0.525522	-1.79603	5.89311	0.304768	0.760543	NA
WBGene00255607	26925	F22H10.11	0.579991	-1.79594	5.86405	0.306263	0.759405	NA
WBGene00005830	23182	srw-83	0.763814	-1.7956	5.88456	0.305138	0.760261	NA
WBGene00196946	16850	F57C7.8	0.56004	-1.7956	5.88456	0.305138	0.760261	NA
WBGene00196475	25281	F07C3.12	0.570621	-1.7955	5.72754	0.313486	0.753912	NA
WBGene00219901	26843	F18A1.11	1.14032	-1.79544	5.69803	0.315098	0.752687	NA
WBGene00016834	8298	sre-50	0.597105	-1.79527	5.65067	0.317709	0.750706	NA
WBGene00048721	21275	21ur-3992	0.62821	-1.79503	5.57072	0.322226	0.747282	NA
WBGene00019723	7347	fbxc-47	0.363224	-1.79491	5.53858	0.324074	0.745882	NA
WBGene00005076	23014	srb-11	0.640175	-1.79483	5.51391	0.325509	0.744796	NA
WBGene00194746	18892	pals-20	0.766999	-1.79406	5.28322	0.339576	0.734176	NA
WBGene00023030	28049	F36H12.18	0.455073	-1.79365	5.18826	0.345714	0.729557	NA
WBGene00014094	7241	ZK829.3	7.20064	-1.7932	1.43729	1.24763	0.212166	0.444493
WBGene00172419	16815	21ur-12465	0.497732	-1.79313	5.05386	0.354804	0.722737	NA
WBGene00196219	42860	C10H11.12	0.874695	-1.79225	4.84831	0.369665	0.711632	NA
WBGene00045158	28450	M163.14	0.608878	-1.79209	4.81453	0.372225	0.709725	NA
WBGene00220111	26880	W01H2.11	0.737467	-1.7916	4.71383	0.380074	0.70389	NA
WBGene00048170	24292	21ur-1207	0.703884	-1.79129	4.65039	0.385191	0.700096	NA
WBGene00045102	24113	F52B11.8	0.97995	-1.79094	4.58664	0.390469	0.69619	NA
WBGene00015559	14696	npr-17	397.674	-1.78969	0.199935	8.95139	3.51037e-19	3.30049e-17
WBGene00044368	24069	K12H6.10	1.10919	-1.78919	4.28229	0.417812	0.676085	NA
WBGene00015770	27719	C14E2.1	1.24311	-1.78853	4.17426	0.428465	0.668313	NA
WBGene00171419	39124	21ur-10699	1.08972	-1.78804	4.10484	0.435594	0.663131	NA
WBGene00013061	21113	Y51A2A.5	3.85547	-1.78735	1.44962	1.23298	0.217585	0.450797
WBGene00196223	42863	ZK470.8	0.732238	-1.78705	3.96303	0.45093	0.65204	NA
WBGene00019614	15270	srt-54	19.2899	-1.78686	0.838569	2.13084	0.0331023	0.14165
WBGene00045098	24111	VY10G11R.3	1.31151	-1.7862	3.8499	0.46396	0.642677	NA
WBGene00220235	46737	ZC412.15	0.739073	-1.7859	5.85763	0.304884	0.760455	NA
WBGene00017024	9293	D1022.5	1.62694	-1.78543	2.92722	0.609939	0.541902	NA
WBGene00047233	20651	21ur-4118	0.641418	-1.78518	5.39091	0.331147	0.740533	NA
WBGene00003590	6544	nex-3	3313.53	-1.78502	0.176776	10.0977	5.65791e-24	8.37842e-22
WBGene00220125	46674	W07G1.23	0.728919	-1.78482	3.68307	0.484601	0.627959	NA
WBGene00012876	15653	Y45F10B.15	1.27947	-1.78469	3.66831	0.486514	0.626603	NA
WBGene00197719	7462	Y42G9A.8	1.23567	-1.78461	3.66052	0.48753	0.625883	NA
WBGene00201933	46090	F22E12.12	1.35229	-1.78327	3.51283	0.507645	0.611703	NA
WBGene00206508	16929	ZK262.19	1.26783	-1.78306	3.49112	0.510741	0.609532	NA
WBGene00000457	6498	ceh-36	29.8041	-1.78115	0.620704	2.86957	0.00411029	0.0306762
WBGene00235333	19450	C24H12.18	4.38214	-1.78101	1.49595	1.19055	0.23383	0.470719
WBGene00173926	24938	21ur-6835	0.332136	-1.78083	5.9978	0.296914	0.766532	NA
WBGene00170950	38717	21ur-8123	0.229634	-1.78083	5.9978	0.296914	0.766532	NA
WBGene00005545	21509	sri-33	1.30574	-1.77967	3.17047	0.561327	0.574575	NA
WBGene00008728	17571	sre-36	6.41598	-1.77953	1.39168	1.27869	0.201007	0.43191
WBGene00015108	22183	B0281.1	2.84956	-1.77705	2.95874	0.60061	0.5481	NA
WBGene00016845	318	C50F7.5	8696.52	-1.77556	0.2823	6.28963	3.1822e-10	1.13322e-08
WBGene00045129	8917	Y75B12B.12	1.52977	-1.77369	2.72078	0.651907	0.514461	NA
WBGene00005571	13549	sri-59	3.4327	-1.77278	1.64155	1.07995	0.280166	0.519748
WBGene00007861	19575	C32A9.1	5.93573	-1.76996	1.19657	1.47919	0.139088	0.346599
WBGene00012269	11170	W04G5.9	2.47603	-1.76615	1.9589	0.901602	0.367268	NA
WBGene00019738	8354	clec-265	676.449	-1.76385	0.218613	8.06837	7.12449e-16	4.75948e-14
WBGene00269373	19957	M01D1.12	4.09289	-1.76306	1.28263	1.37457	0.169266	0.388461
WBGene00201804	15436	C05A2.3	0.450342	-1.76016	5.90105	0.298279	0.76549	NA
WBGene00172189	39799	21ur-8883	0.448171	-1.76016	5.90105	0.298279	0.76549	NA
WBGene00196631	11429	F26D11.15	2.23431	-1.75919	1.90535	0.923287	0.355858	NA
WBGene00006760	17043	unc-23	2642.66	-1.75844	0.16465	10.6799	1.26433e-26	2.20267e-24
WBGene00020795	27893	T25D1.3	3.44878	-1.75585	1.74324	1.00723	0.313822	0.552195
WBGene00049349	10897	21ur-1350	1.65965	-1.75305	2.77934	0.630742	0.528209	NA
WBGene00012285	14161	pitr-6	2.59118	-1.7515	3.14006	0.557791	0.576987	NA
WBGene00219266	4979	mir-4938	0.928864	-1.75143	3.16156	0.553976	0.579595	NA
WBGene00206395	17930	C08H9.18	1.61704	-1.75135	3.18476	0.549915	0.582378	NA
WBGene00003309	21483	mir-81	0.624599	-1.75002	3.72318	0.470033	0.638332	NA
WBGene00045019	24101	Y37A1B.18	0.867197	-1.74979	3.85344	0.454084	0.649768	NA
WBGene00020041	14291	R13A1.1	1.41403	-1.74964	3.94855	0.44311	0.657686	NA
WBGene00206534	46423	C31A11.13	1.79088	-1.7495	3.33145	0.525147	0.599481	NA
WBGene00197021	14411	M01G5.8	0.935115	-1.74913	4.3312	0.403844	0.686327	NA
WBGene00044572	24083	T22E5.7	1.11777	-1.74898	4.46578	0.391642	0.695323	NA
WBGene00171742	39413	21ur-13989	0.883215	-1.74897	4.4715	0.391138	0.695695	NA
WBGene00014517	23616	T11F9.15	0.700173	-1.74895	4.5043	0.388285	0.697805	NA
WBGene00005208	26609	srg-51	0.750524	-1.74886	4.59273	0.380789	0.70336	NA
WBGene00005705	26734	sru-42	0.919957	-1.74883	4.63217	0.377541	0.705772	NA
WBGene00007406	23290	C07A9.10	1.70527	-1.74877	4.68758	0.373065	0.7091	NA
WBGene00195407	11926	F08G5.9	0.68381	-1.74867	4.80893	0.36363	0.716134	NA
WBGene00198686	20373	F18E2.12	0.792064	-1.74867	4.80583	0.363865	0.715959	NA
WBGene00219986	16942	F59A2.7	0.627009	-1.74867	4.82724	0.36225	0.717165	NA
WBGene00219733	11464	linc-53	0.970622	-1.74844	5.13728	0.340343	0.733599	NA
WBGene00013827	23569	Y116F11B.11	0.77658	-1.7484	5.17661	0.33775	0.735552	NA
WBGene00200204	3977	F57F5.7	0.796395	-1.74828	5.39269	0.324194	0.745791	NA
WBGene00219551	19439	K07F5.21	0.739154	-1.74824	5.46091	0.320137	0.748864	NA
WBGene00195000	25026	F54D8.7	0.67208	-1.74818	5.56298	0.314253	0.753329	NA
WBGene00184956	24996	F49C5.12	1.02019	-1.74803	5.91236	0.295657	0.767492	NA
WBGene00196675	43122	B0403.8	0.878562	-1.74797	6.08652	0.287187	0.77397	NA
WBGene00220237	26897	ZK20.10	0.805106	-1.74796	6.02525	0.290107	0.771735	NA
WBGene00201253	26164	K08A8.25	0.415565	-1.74796	6.11894	0.285663	0.775136	NA
WBGene00045845	24161	21ur-1701	0.485439	-1.74796	6.07049	0.287943	0.77339	NA
WBGene00049688	32248	21ur-1593	0.122489	-1.74795	6.11894	0.285663	0.775136	NA
WBGene00008268	21057	srt-32	0.1986	-1.74795	6.11894	0.285663	0.775136	NA
WBGene00077613	14856	F21H7.16	0.1986	-1.74795	6.11894	0.285663	0.775136	NA
WBGene00005274	23054	srh-51	0.158138	-1.74795	6.11894	0.285663	0.775136	NA
WBGene00005323	16507	srh-104	0.158138	-1.74795	6.11894	0.285663	0.775136	NA
WBGene00045136	28441	D1046.6	0.158138	-1.74795	6.11894	0.285663	0.775136	NA
WBGene00198026	25552	Y71F9B.19	0.158138	-1.74795	6.11894	0.285663	0.775136	NA
WBGene00014872	16097	Y38E10A.t2	0.156788	-1.74795	6.11894	0.285663	0.775136	NA
WBGene00045634	28627	21ur-3163	0.156788	-1.74795	6.11894	0.285663	0.775136	NA
WBGene00046375	29286	21ur-3397	0.156788	-1.74795	6.11894	0.285663	0.775136	NA
WBGene00174148	41505	21ur-9717	0.180034	-1.74795	6.11894	0.285663	0.775136	NA
WBGene00165374	33790	21ur-14970	0.161598	-1.74795	6.11894	0.285663	0.775136	NA
WBGene00167198	35388	21ur-5756	0.166407	-1.74795	6.11894	0.285663	0.775136	NA
WBGene00169333	16242	21ur-11358	0.166407	-1.74795	6.11894	0.285663	0.775136	NA
WBGene00194806	42289	mir-2211	0.166407	-1.74795	6.11894	0.285663	0.775136	NA
WBGene00195843	42651	F57G12.3	0.166407	-1.74795	6.11894	0.285663	0.775136	NA
WBGene00196047	42768	C02C6.4	0.166407	-1.74795	6.11894	0.285663	0.775136	NA
WBGene00219833	46525	C26C6.12	0.248305	-1.74795	6.11894	0.285663	0.775136	NA
WBGene00050500	32991	21ur-1953	0.257281	-1.74795	6.11894	0.285663	0.775136	NA
WBGene00197104	43341	C35A5.14	0.257281	-1.74795	6.11894	0.285663	0.775136	NA
WBGene00235116	16951	C03G6.21	0.257281	-1.74795	6.11894	0.285663	0.775136	NA
WBGene00049888	32436	21ur-1334	0.182504	-1.74795	6.11894	0.285663	0.775136	NA
WBGene00167431	24603	21ur-10303	0.173221	-1.74795	6.11894	0.285663	0.775136	NA
WBGene00170844	38624	21ur-8624	0.173221	-1.74795	6.11894	0.285663	0.775136	NA
WBGene00197454	25454	T04H1.11	0.173221	-1.74795	6.11894	0.285663	0.775136	NA
WBGene00048369	31070	21ur-1638	0.205634	-1.74795	6.11894	0.285663	0.775136	NA
WBGene00202041	26299	Y69A2AR.45	0.205634	-1.74795	6.11894	0.285663	0.775136	NA
WBGene00172518	19854	21ur-10214	0.297693	-1.74795	6.11894	0.285663	0.775136	NA
WBGene00170269	38119	21ur-10187	0.222909	-1.74795	6.11894	0.285663	0.775136	NA
WBGene00201883	18429	R04F11.27	0.243427	-1.74795	6.11894	0.285663	0.775136	NA
WBGene00198238	21373	B0207.15	0.220063	-1.74795	6.11894	0.285663	0.775136	NA
WBGene00050516	33006	21ur-141	0.254481	-1.74795	6.11894	0.285663	0.775136	NA
WBGene00198180	25585	F16F9.12	0.300973	-1.74795	6.11894	0.285663	0.775136	NA
[truncated: 44,621 more rows]

## Sheet: Upregulated genes
Table S2. Genes up-regulated in sgk-1(lf) compared to wild type following CS.
gene_id	entrezid	symbol	baseMean	log2FoldChange	lfcSE	stat	pvalue	padj
WBGene00012091	18650	pals-29	39.1561	8.7019	1.56751	-5.55141	2.83381e-08	7.67634e-07
WBGene00009077	6639	F23B2.10	27.3784	7.96202	2.34848	-3.39029	0.000698188	0.0071757
WBGene00001732	22967	grl-23	3.19139	6.93133	5.95141	-1.16465	0.24416	0.482026
WBGene00021805	415	Y53G8AM.5	777.482	6.8605	0.809137	-8.47879	2.27555e-17	1.8133e-15
WBGene00044331	13351	clec-25	11.0964	6.79392	1.64072	-4.14081	3.46075e-05	0.000528329
WBGene00000628	16473	col-51	2.91335	6.77935	5.95176	-1.13905	0.254682	NA
WBGene00012727	265	Y39G8B.7	67.5214	6.6567	1.14277	-5.82507	5.70884e-09	1.73116e-07
WBGene00022545	12855	ZC196.1	13.8845	6.63883	1.64866	-4.02681	5.65379e-05	0.0008088
WBGene00005703	619	sru-40	5.12326	6.52424	2.41786	-2.69835	0.00696841	0.0464648
WBGene00138724	8926	F15B9.11	10.6033	6.46105	1.85015	-3.49217	0.000479119	0.00526853
WBGene00009061	16570	pals-14	280.247	6.44674	0.570233	-11.3055	1.23313e-29	2.49009e-27
WBGene00009099	12593	F25B3.2	6.27362	6.36017	1.94481	-3.27034	0.0010742	0.0103014
WBGene00006183	10069	str-135	5.15462	6.14963	1.89578	-3.24386	0.00117924	0.0111701
WBGene00022809	1446	ZK697.14	6.35733	6.04161	2.04502	-2.9543	0.00313375	0.0247937
WBGene00016226	9272	C29F9.12	16.3315	6.0272	1.63422	-3.68812	0.00022592	0.00273474
WBGene00050934	17857	T19C9.10	3.63447	5.98918	2.8386	-2.10991	0.0348663	0.147167
WBGene00195165	13903	F57G4.11	26.0665	5.98897	2.28786	-2.61772	0.00885206	0.0554854
WBGene00021084	12332	W08E12.3	8.52998	5.94691	1.86561	-3.18765	0.00143435	0.0131451
WBGene00000614	22961	col-37	1.36761	5.93157	5.95454	-0.996142	0.319181	NA
WBGene00086559	4460	Y43F8B.20	6.39609	5.91045	1.96541	-3.00724	0.00263632	0.0215928
WBGene00011853	12642	clec-40	4.9834	5.90289	1.97481	-2.98909	0.00279807	0.0225802
WBGene00235313	14962	C25E10.17	4.89607	5.88968	1.99855	-2.94697	0.00320904	0.0253331
WBGene00219731	13457	linc-49	7.2228	5.87833	1.83299	-3.20697	0.00134143	0.012463
WBGene00044212	440	Y68A4A.13	194.45	5.87103	0.544604	-10.7804	4.26141e-27	7.57253e-25
WBGene00009494	4671	hrg-5	8.01123	5.80792	1.68604	-3.44472	0.000571649	0.00609005
WBGene00002108	3041	ins-25	4.43198	5.76715	2.08854	-2.76134	0.00575654	0.040068
WBGene00018255	10305	F40H6.5	3.6185	5.75775	2.12715	-2.70679	0.00679368	0.0455389
WBGene00014741	6750	F22B8.2	5.03646	5.69682	1.90516	-2.99021	0.00278788	0.0225082
WBGene00044386	17835	C27A2.7	3.32552	5.68716	2.3185	-2.45295	0.0141689	0.0778065
WBGene00050906	24427	F20E11.17	3.95803	5.67242	2.25112	-2.51982	0.0117413	0.0681154
WBGene00016873	20568	C52B11.4	3.41019	5.64713	2.50823	-2.25144	0.0243575	0.115073
WBGene00020342	22296	fbxa-201	5.25053	5.6415	1.9087	-2.95567	0.00311989	0.024695
WBGene00010707	4692	cyp-14A3	6.60266	5.60928	1.83185	-3.06209	0.002198	0.0185728
WBGene00005719	10067	srv-8	1.68257	5.56	3.13852	-1.77154	0.0764714	NA
WBGene00018198	15739	F39E9.6	1.5136	5.54125	4.86415	-1.1392	0.254618	NA
WBGene00008477	147	clec-17	17.7092	5.47404	1.17734	-4.64949	3.32763e-06	6.31751e-05
WBGene00255703	14462	C06A12.20	2.11627	5.44918	2.88205	-1.89073	0.0586604	NA
WBGene00014842	7762	clec-30	1.98015	5.39036	3.00802	-1.79199	0.0731341	NA
WBGene00012190	2235	W02A2.5	4.91797	5.37504	2.0492	-2.623	0.00871598	0.0549815
WBGene00219308	12450	W06G6.20	52.3884	5.37198	0.707868	-7.58895	3.22517e-14	1.76342e-12
WBGene00007669	14569	C18D1.2	6.42698	5.36687	1.97877	-2.71223	0.00668325	0.0450916
WBGene00018034	23797	sek-5	1.90638	5.32778	2.36612	-2.25169	0.0243416	NA
WBGene00001237	6515	elc-2	5.48862	5.32514	1.92822	-2.7617	0.00575021	0.0400396
WBGene00005352	11561	srh-135	1.87538	5.30792	3.1805	-1.6689	0.095138	NA
WBGene00077684	6936	Y26D4A.21	15.0482	5.28761	1.64954	-3.20551	0.00134824	0.0125109
WBGene00011851	23493	clec-23	2.47702	5.28648	2.73416	-1.93349	0.0531758	NA
WBGene00044663	9418	F26G1.10	9.17539	5.25047	1.7976	-2.92083	0.00349105	0.0269722
WBGene00022433	15828	Y108F1.5	3.77318	5.24568	2.1315	-2.46102	0.0138542	0.0766807
WBGene00044589	12370	C29F5.8	1.36773	5.21881	4.43069	-1.17788	0.238845	NA
WBGene00255469	5983	C25G4.17	7.44682	5.20954	1.64086	-3.17489	0.00149892	0.0136175
WBGene00008037	14089	C40C9.4	4.36296	5.19387	2.22747	-2.33174	0.0197146	0.098907
WBGene00009316	17088	abhd-11.1	3.8687	5.18773	2.08873	-2.48368	0.0130033	0.0731918
WBGene00206418	983	M04C3.5	27.4137	5.17729	1.64231	-3.15244	0.00161914	0.0145113
WBGene00189948	16275	F56H9.8	2.69324	5.17401	2.76703	-1.86988	0.0615004	NA
WBGene00008788	13092	F14D7.1	1.87048	5.15165	2.8046	-1.83686	0.0662307	NA
WBGene00009424	14105	F35E8.13	1.93861	5.15125	3.27873	-1.57111	0.116157	NA
WBGene00044562	18316	C14E2.7	2.01753	5.15114	3.13842	-1.64132	0.100731	NA
WBGene00008295	18577	nlp-39	1.82874	5.15088	2.86405	-1.79846	0.072104	NA
WBGene00016731	18721	C46H11.7	6.64008	5.14805	1.97533	-2.60617	0.00915615	0.0567509
WBGene00007243	19046	nspb-7	4.59915	5.12654	1.95416	-2.6234	0.00870576	0.0549366
WBGene00013573	14191	Y75B12B.11	3.00712	5.10401	2.21829	-2.30088	0.0213985	NA
WBGene00012965	6237	fipr-17	1.51747	5.10264	4.27804	-1.19275	0.232967	NA
WBGene00009874	2168	F49C12.4	3.23864	5.07953	2.52067	-2.01515	0.0438887	0.171257
WBGene00005144	15987	srd-67	1.52917	5.07775	3.82032	-1.32914	0.183801	NA
WBGene00015602	4293	fbxa-158	26.5537	5.03634	0.956708	-5.26424	1.40767e-07	3.4033e-06
WBGene00014732	21658	F09F3.8	48.598	5.03469	0.542501	-9.28052	1.68659e-20	1.74248e-18
WBGene00010108	19101	F55C10.4	3.54384	5.03102	2.46233	-2.04319	0.0410336	0.164672
WBGene00220053	16944	R166.11	0.828811	5.02766	5.95998	-0.843569	0.398911	NA
WBGene00015227	2284	ddn-1	588.411	5.02468	0.279158	-17.9994	1.96843e-72	2.4985e-69
WBGene00020672	13296	T22B7.3	323.445	4.98902	0.423193	-11.789	4.44822e-32	1.02656e-29
WBGene00219723	6975	linc-135	6.49739	4.98732	1.78955	-2.78692	0.00532121	0.0376725
WBGene00009875	16584	F49C12.5	2.06297	4.96162	3.02962	-1.63771	0.101483	NA
WBGene00235327	26915	T02B11.10	0.956785	4.94871	5.4056	-0.915479	0.35994	NA
WBGene00014764	23646	srz-46	1.33368	4.9485	3.81875	-1.29584	0.19503	NA
WBGene00021405	23919	Y38C1AB.3	1.60278	4.94779	2.64795	-1.86854	0.0616871	NA
WBGene00008292	23316	C54C8.4	5.66301	4.92225	1.80228	-2.73112	0.00631196	0.0431067
WBGene00005289	8069	srh-68	2.61266	4.92117	2.3498	-2.0943	0.0362336	NA
WBGene00018527	14267	F47B3.3	1.68973	4.92099	2.6443	-1.86098	0.0627471	NA
WBGene00015398	7773	tag-293	1.19709	4.92073	3.62378	-1.3579	0.174496	NA
WBGene00022438	430	Y110A2AL.1	16.7479	4.91375	1.15845	-4.24165	2.21885e-05	0.000355536
WBGene00197269	20342	F59C12.8	0.794678	4.90897	5.96099	-0.823516	0.410214	NA
WBGene00138719	10906	F26F2.10	6.05978	4.89913	1.84518	-2.6551	0.00792857	0.0512149
WBGene00206460	26390	F56H9.9	3.57446	4.89569	2.152	-2.27495	0.0229091	0.110294
WBGene00019438	18235	cyp-25A6	2.965	4.89566	2.15874	-2.26783	0.0233396	NA
WBGene00015225	5273	B0507.8	483.38	4.85551	0.31423	-15.4521	7.30536e-54	4.18762e-51
WBGene00000758	12988	col-185	0.638219	4.83255	5.96168	-0.810603	0.417594	NA
WBGene00219603	16449	anr-57	0.721503	4.8077	5.96191	-0.806404	0.42001	NA
WBGene00206392	18934	F47D2.11	1.94233	4.8062	3.84083	-1.25134	0.210809	NA
WBGene00005727	6576	srv-16	1.59206	4.80536	3.39816	-1.41411	0.157331	NA
WBGene00013466	19660	srz-47	1.62536	4.80526	3.35721	-1.43133	0.152337	NA
WBGene00235320	21449	R02F11.11	1.94487	4.80498	3.25277	-1.47719	0.139623	NA
WBGene00000738	22963	col-165	40.2507	4.80451	1.22123	-3.93416	8.34888e-05	0.00113947
WBGene00019234	9336	ugt-8	331.615	4.801	0.358506	-13.3917	6.76319e-41	2.22559e-38
WBGene00010030	17593	F54B11.7	4.49955	4.78182	1.94782	-2.45496	0.01409	0.0775166
WBGene00005243	23045	srh-18	2.17151	4.77485	3.35682	-1.42243	0.154901	NA
WBGene00012616	23527	dct-14	1.30983	4.77481	3.33598	-1.43131	0.152342	NA
WBGene00016459	10740	C35E7.7	2.63562	4.77158	2.44196	-1.95399	0.0507019	NA
WBGene00005438	15530	srh-230	2.8164	4.76836	2.12603	-2.24284	0.0249069	NA
WBGene00020787	23893	T25B6.1	1.22005	4.74452	4.53674	-1.0458	0.295654	NA
WBGene00008884	21067	nhr-281	2.24307	4.7302	2.8579	-1.65513	0.0978981	NA
WBGene00012793	19646	Y43D4A.7	3.28404	4.71102	1.89004	-2.49255	0.0126829	0.0718614
WBGene00006192	14542	str-145	2.3167	4.68168	2.30312	-2.03275	0.0420777	NA
WBGene00009706	189	argk-1	3483.24	4.68019	0.235556	-19.8687	7.59993e-88	1.9293e-84
WBGene00044247	11375	F36H2.4	1.09225	4.67909	5.96318	-0.784665	0.43265	NA
WBGene00018448	17730	F45D11.1	48.3895	4.66355	0.976859	-4.77403	1.8058e-06	3.63821e-05
WBGene00017379	1326	F11C7.7	3.1024	4.65306	2.12778	-2.18682	0.028756	NA
WBGene00020327	14296	clec-21	2.4197	4.65045	2.38524	-1.94967	0.051215	NA
WBGene00011140	22103	R08B4.4	2.82881	4.64977	2.48503	-1.87111	0.0613296	NA
WBGene00000555	22958	cnc-1	0.844956	4.64513	5.85687	-0.793107	0.427715	NA
WBGene00009279	12598	F31B9.2	1.779	4.62758	2.58352	-1.79119	0.0732626	NA
WBGene00012311	23513	W06G6.9	17.55	4.62337	1.10697	-4.1766	2.95894e-05	0.000459619
WBGene00012778	6713	Y42A5A.3	120.63	4.6197	0.550219	-8.39612	4.61491e-17	3.61264e-15
WBGene00045362	21811	F11D11.12	1.69151	4.61341	3.28721	-1.40344	0.160485	NA
WBGene00016830	23755	sre-55	1.04358	4.61103	4.76037	-0.968628	0.332731	NA
WBGene00010950	16056	srt-44	1.14641	4.61098	4.81376	-0.957875	0.338126	NA
WBGene00019558	16707	srbc-12	0.827096	4.61031	5.9639	-0.773036	0.439501	NA
WBGene00045401	18330	eol-1	215.563	4.61023	0.362716	-12.7103	5.1833e-37	1.56114e-34
WBGene00269336	11976	F28A10.11	1.51216	4.59503	2.89968	-1.58467	0.113042	NA
WBGene00007660	2635	pals-6	171.377	4.58193	0.502358	-9.12085	7.45382e-20	7.38204e-18
WBGene00017678	4334	asp-12	1616.64	4.57458	0.220684	-20.7291	1.89336e-95	5.6075e-92
WBGene00197080	22408	ZC15.11	4.28327	4.5502	1.88238	-2.41726	0.0156378	0.083803
WBGene00015473	14209	C05D9.4	2.31524	4.54668	2.13765	-2.12695	0.0334244	NA
WBGene00008757	9127	F13E9.8	0.881588	4.54449	5.96463	-0.761906	0.446116	NA
WBGene00165738	21837	21ur-7199	0.630605	4.54449	5.96463	-0.761905	0.446117	NA
WBGene00017543	21701	lgc-5	1.25251	4.54281	3.92834	-1.15642	0.247509	NA
WBGene00008294	19068	clec-11	1.54305	4.54279	3.91736	-1.15966	0.246189	NA
WBGene00077572	24444	T08G5.14	2.37573	4.53973	2.90143	-1.56465	0.117665	NA
WBGene00011797	9201	T16G1.3	4.14365	4.53465	2.33086	-1.94548	0.0517169	0.191388
WBGene00012312	16611	W06G6.10	18.3665	4.51633	0.931906	-4.84633	1.25763e-06	2.61381e-05
WBGene00008839	20505	sre-37	2.36793	4.50376	2.82972	-1.59159	0.111477	NA
WBGene00005926	14054	srx-35	2.30574	4.50212	2.50814	-1.795	0.0726533	NA
WBGene00023266	28199	F07E5.10	0.884096	4.4849	5.93614	-0.755525	0.449934	NA
WBGene00194768	20274	Y50E8A.19	0.501458	4.48489	5.96532	-0.751826	0.452155	NA
WBGene00008302	9629	pals-38	61.4862	4.4761	0.690798	-6.47961	9.19609e-11	3.45485e-09
WBGene00008261	17067	C52G5.3	1.09019	4.46863	4.73603	-0.943539	0.345405	NA
WBGene00001545	16991	gcy-20	3.39436	4.46719	2.70314	-1.65259	0.0984142	0.281345
WBGene00012509	17140	Y26D4A.12	2.73701	4.46618	2.34172	-1.90723	0.0564912	NA
WBGene00044382	4446	Y14H12A.2	4.45054	4.4648	2.08616	-2.1402	0.0323389	0.139244
WBGene00044121	17828	gcp-2.3	17.5897	4.46402	1.26774	-3.52124	0.000429535	0.00481432
WBGene00013609	8725	clec-37	10.4306	4.44966	1.48683	-2.99272	0.00276507	0.022426
WBGene00009778	191	F46C5.1	102.562	4.43362	0.486116	-9.1205	7.47758e-20	7.38204e-18
WBGene00189995	6945	C06E7.88	5.4923	4.43297	1.84764	-2.39927	0.0164279	0.086696
WBGene00007715	11598	C25D7.2	3.03106	4.43109	2.25868	-1.96181	0.0497848	NA
WBGene00194714	20735	ZC204.17	1.59636	4.42968	4.26462	-1.0387	0.298942	NA
WBGene00005716	14536	srv-5	2.18065	4.39393	2.48469	-1.7684	0.0769935	NA
WBGene00006005	19542	srx-114	2.81927	4.39323	2.6068	-1.6853	0.0919307	NA
WBGene00020154	14293	T01G6.10	2.13156	4.39287	2.68492	-1.63612	0.101814	NA
WBGene00012089	20056	T27E7.4	1.45984	4.39159	3.05689	-1.43662	0.150826	NA
WBGene00013286	20537	Y57A10C.8	1.49875	4.39097	3.33934	-1.31492	0.188536	NA
WBGene00008905	1151	F17B5.1	40.3939	4.39052	0.728189	-6.02937	1.64602e-09	5.33757e-08
WBGene00197940	11437	F40E3.8	0.756242	4.3894	4.98624	-0.880302	0.378696	NA
WBGene00009824	10627	gpdh-1	487.646	4.38931	0.235828	-18.6123	2.55377e-77	3.49081e-74
WBGene00194918	19380	K08D8.9	0.780558	4.38908	5.85421	-0.74973	0.453417	NA
WBGene00013049	4743	Y50E8A.6	4.6129	4.36852	1.79916	-2.42809	0.0151785	0.0820321
WBGene00012045	16065	T26E4.3	3.73236	4.35806	2.36336	-1.84401	0.0651817	0.220247
WBGene00010511	14123	sre-7	2.82829	4.35189	3.11173	-1.39854	0.16195	NA
WBGene00005313	14529	srh-92	2.24595	4.35137	3.23763	-1.344	0.178949	NA
WBGene00011710	7191	T11F9.7	1.58454	4.34949	3.93225	-1.10611	0.268681	NA
WBGene00012625	18659	Y38H6C.13	0.92103	4.34761	5.75851	-0.754989	0.450256	NA
WBGene00009566	23356	srsx-1	0.59394	4.3475	5.96702	-0.728589	0.466253	NA
WBGene00199400	44645	C48E7.14	0.524905	4.3475	5.96702	-0.728589	0.466253	NA
WBGene00010618	23402	K07A1.14	0.777804	4.3475	5.96702	-0.728588	0.466253	NA
WBGene00010153	23381	srxa-2	1.11584	4.3475	5.96702	-0.728587	0.466254	NA
WBGene00017553	18203	nep-8	413.076	4.34461	0.284772	-15.2565	1.49145e-52	8.03121e-50
WBGene00011903	10664	T21E8.5	2.06318	4.34445	2.35953	-1.84123	0.0655873	NA
WBGene00019104	23837	asp-7	2.23981	4.34146	2.11865	-2.04916	0.0404467	NA
WBGene00017411	13760	F13A2.2	3.08266	4.28749	1.87738	-2.28376	0.0223855	NA
WBGene00006464	99	bath-47	120.016	4.27259	0.362223	-11.7955	4.11948e-32	9.63199e-30
WBGene00173920	21856	21ur-8696	2.64475	4.27008	1.96921	-2.16843	0.0301262	NA
WBGene00220145	46685	Y39A3CR.11	0.89707	4.26471	4.02214	-1.06031	0.289004	NA
WBGene00201129	16405	M02F4.11	0.929937	4.26469	4.05647	-1.05133	0.293107	NA
WBGene00015458	14208	C04G6.10	6.25188	4.25062	1.74218	-2.43983	0.0146942	0.0799731
WBGene00005049	26587	sra-23	0.418768	4.22228	5.96872	-0.707402	0.479317	NA
WBGene00017401	23770	F12D9.2	0.418768	4.22228	5.96872	-0.707402	0.479317	NA
WBGene00005981	23222	srx-90	0.545553	4.22228	5.96872	-0.707402	0.479317	NA
WBGene00199069	44454	F35B12.13	0.616953	4.22228	5.96872	-0.707402	0.479317	NA
WBGene00199723	20836	W07E6.7	0.468289	4.22228	5.96872	-0.707401	0.479317	NA
WBGene00077455	22860	Y69H2.17	0.856842	4.22228	5.96872	-0.707401	0.479317	NA
WBGene00005454	26672	srh-248	1.05042	4.22219	5.80768	-0.727002	0.467225	NA
WBGene00219834	19444	C26C6.13	0.920117	4.22164	4.9997	-0.844378	0.398458	NA
WBGene00198001	11939	Y54E10A.24	1.01976	4.22031	4.03819	-1.0451	0.295977	NA
WBGene00219830	22941	C24G7.6	1.27535	4.22027	3.97736	-1.06107	0.288656	NA
WBGene00005909	19998	srx-18	2.11892	4.21676	2.96612	-1.42164	0.155131	NA
WBGene00021580	411	clec-174	9.68145	4.21635	1.37691	-3.06218	0.00219729	0.0185728
WBGene00200685	26054	D2023.17	1.03182	4.19778	4.14959	-1.01161	0.311723	NA
WBGene00194810	25016	mir-2218.2	0.475055	4.19565	5.9691	-0.702895	0.482121	NA
WBGene00005686	23146	sru-23	0.717565	4.17556	5.96939	-0.699496	0.484242	NA
WBGene00005555	21510	sri-43	0.526189	4.17556	5.96939	-0.699496	0.484242	NA
WBGene00005838	15537	srw-91	0.701128	4.17556	5.96939	-0.699496	0.484242	NA
WBGene00013791	16635	Y116A8C.11	0.986784	4.17512	4.82845	-0.864692	0.387208	NA
WBGene00013072	27257	Y51A2D.1	0.962279	4.17459	4.12497	-1.01203	0.311524	NA
WBGene00235290	18953	Y59H11AR.10	1.21499	4.1733	3.26716	-1.27735	0.20148	NA
WBGene00016105	23719	C25F6.6	1.68074	4.17221	2.8964	-1.44048	0.149731	NA
WBGene00005213	23039	srg-56	1.98078	4.17186	2.80724	-1.48611	0.13725	NA
WBGene00009997	5653	F53F4.15	1.48015	4.17166	2.7618	-1.51049	0.130919	NA
WBGene00022071	10365	Y67D8C.7	3.80752	4.1673	2.20728	-1.88798	0.0590289	0.207301
WBGene00007661	23296	pals-7	3.51197	4.16651	2.15232	-1.93583	0.0528887	0.19394
WBGene00001109	9002	dsl-7	12.5994	4.16293	1.41293	-2.9463	0.00321604	0.0253657
WBGene00018645	1356	F49F1.5	38.4419	4.16127	0.791446	-5.25781	1.45781e-07	3.50546e-06
WBGene00009041	4163	cut-3	46.9247	4.16053	1.14122	-3.64569	0.000266672	0.00316762
WBGene00007659	17557	pals-5	79.6216	4.1313	0.748361	-5.52047	3.38098e-08	9.06186e-07
WBGene00017656	13768	F21C10.6	0.391732	4.12733	5.97011	-0.691332	0.489357	NA
WBGene00044014	28296	F15H10.10	0.391732	4.12733	5.97011	-0.691332	0.489357	NA
WBGene00007359	21530	C06A12.8	0.820978	4.12733	5.97011	-0.691332	0.489357	NA
WBGene00018649	21189	F49F1.9	0.729319	4.12733	5.97011	-0.691332	0.489357	NA
WBGene00008067	16555	C43D7.4	3.28376	4.12733	5.97011	-0.691332	0.489357	0.704111
WBGene00201871	26264	T24B8.21	0.730464	4.1273	5.10393	-0.808652	0.418715	NA
WBGene00009409	27107	F35E2.1	1.23537	4.12719	3.7926	-1.08822	0.276498	NA
WBGene00021718	20614	Y49F6B.6	1.21179	4.12715	3.548	-1.16323	0.244735	NA
WBGene00198530	14920	T26A5.10	1.18058	4.12708	3.2785	-1.25883	0.208091	NA
WBGene00008911	23339	F17C8.6	1.15006	4.127	3.03737	-1.35874	0.174228	NA
WBGene00013368	17646	Y60A9.1	1.9334	4.12687	2.75793	-1.49637	0.134558	NA
WBGene00219444	3981	Y41E3.461	3.34817	4.12633	2.21619	-1.86191	0.0626162	0.215471
WBGene00020062	18244	nhr-270	9.80226	4.12512	1.34908	-3.05773	0.00223019	0.0187822
WBGene00019549	5862	K09C4.4	5.4174	4.12495	1.79599	-2.29676	0.0216325	0.105789
WBGene00014186	8736	nhr-244	14.7737	4.12028	1.17626	-3.50286	0.000460286	0.00508345
WBGene00009836	1677	fbxa-185	4.09576	4.11248	1.91641	-2.14593	0.0318785	0.137964
WBGene00009855	10629	clec-22	36.4677	4.09452	0.654062	-6.26014	3.84633e-10	1.35614e-08
WBGene00016922	14236	swt-2	8.96743	4.09149	1.33676	-3.06075	0.00220787	0.0186295
WBGene00005824	26773	srw-77	3.67678	4.08675	2.04986	-1.99368	0.0461873	0.176809
WBGene00010088	21083	F55B12.2	2.92359	4.08545	2.13704	-1.91173	0.0559105	NA
WBGene00005757	23165	srw-10	3.47021	4.08346	2.32308	-1.75778	0.0787845	0.247437
WBGene00020288	18786	srt-73	1.72377	4.0817	2.58966	-1.57615	0.11499	NA
WBGene00044043	24044	Y46G5A.38	1.95727	4.08153	2.62215	-1.55656	0.119575	NA
WBGene00202030	26296	C24F3.7	1.1374	4.08123	2.68953	-1.51745	0.129154	NA
WBGene00043666	28293	Y45G5AM.4	1.33002	4.08054	2.86922	-1.42218	0.154975	NA
WBGene00021091	22792	W08F4.1	1.72462	4.08006	3.03286	-1.34528	0.178533	NA
WBGene00005098	10546	srd-20	1.1477	4.07895	3.61169	-1.12937	0.25874	NA
WBGene00202513	18933	ZK938.10	1.50925	4.07862	3.87871	-1.05154	0.293011	NA
WBGene00009248	13616	F29C12.6	1.08224	4.07836	4.14243	-0.984534	0.324853	NA
WBGene00008676	27088	oac-15	1.38485	4.07773	5.22202	-0.780872	0.434878	NA
WBGene00014806	20556	M01G12.8	0.726388	4.07773	5.2268	-0.780157	0.435299	NA
WBGene00010600	15122	nhr-196	0.905152	4.0776	5.58564	-0.730015	0.465381	NA
WBGene00206486	17934	Y54F10BM.20	0.724947	4.07748	5.97087	-0.682895	0.494673	NA
WBGene00019338	19266	K02F6.4	3.26894	4.07393	2.14359	-1.90052	0.0573647	0.20357
WBGene00005037	17017	sra-11	8.32136	4.04591	1.39927	-2.89144	0.0038348	0.0289609
WBGene00219561	18941	linc-142	3.03787	4.03677	2.4933	-1.61905	0.105437	NA
WBGene00086560	8437	ZK355.8	13.0006	4.03412	1.25566	-3.21276	0.00131468	0.0122744
WBGene00001529	16481	gcy-2	2.4665	4.03347	2.79777	-1.44167	0.149396	NA
WBGene00005676	21019	sru-13	2.42167	4.0326	2.90889	-1.3863	0.165654	NA
WBGene00012328	21626	W07G1.1	2.371	4.03176	3.03546	-1.32822	0.184106	NA
WBGene00004997	91	spp-12	1.69037	4.03155	3.07147	-1.31258	0.189324	NA
WBGene00017544	19221	lgc-6	1.90823	4.02979	3.44981	-1.16812	0.242759	NA
WBGene00171081	38828	21ur-6563	0.630476	4.02943	5.97164	-0.674762	0.499827	NA
WBGene00010528	1188	K03D3.2	6.15696	4.02941	1.52024	-2.6505	0.00803718	0.0517177
WBGene00017212	16674	F07E5.7	1.95191	4.02924	3.60974	-1.11621	0.264331	NA
WBGene00018003	23795	F33D11.6	0.847821	4.02661	5.05988	-0.795792	0.426153	NA
WBGene00006260	27009	str-229	0.997697	4.02596	5.86596	-0.686327	0.492507	NA
WBGene00199101	19903	C44E12.5	0.414217	4.02591	5.97169	-0.674165	0.500207	NA
WBGene00202468	26376	F26A10.27	0.414217	4.02591	5.97169	-0.674165	0.500207	NA
WBGene00005671	21018	sru-8	0.845166	4.02591	5.97169	-0.674165	0.500207	NA
WBGene00170262	38112	21ur-9345	0.364696	4.0259	5.97169	-0.674165	0.500207	NA
WBGene00022003	14808	Y59E9AR.8	0.579319	4.0259	5.97169	-0.674165	0.500207	NA
WBGene00219753	26829	linc-152	0.579319	4.0259	5.97169	-0.674165	0.500207	NA
WBGene00235326	19950	F22F7.11	0.761624	4.0259	5.97169	-0.674165	0.500207	NA
WBGene00005540	20484	sri-28	0.458047	4.0259	5.97169	-0.674164	0.500207	NA
WBGene00014195	11210	srz-10	1.91064	4.02563	3.45719	-1.16442	0.244253	NA
WBGene00007481	20020	C09F9.4	1.91217	4.02039	2.64864	-1.5179	0.129038	NA
WBGene00220222	46730	Y105C5A.1283	0.497733	4.00297	5.97207	-0.670282	0.502678	NA
WBGene00195439	16832	T27A8.6	0.80833	4.00254	5.16194	-0.775394	0.438107	NA
WBGene00019214	5364	H20E11.2	122.517	4.00063	0.423938	-9.43681	3.84294e-21	4.21538e-19
WBGene00220088	20447	T23F11.12	1.86231	3.99771	2.87542	-1.3903	0.164437	NA
WBGene00235281	16952	Y4C6A.68	9.02005	3.98346	1.41657	-2.81205	0.00492275	0.0354015
WBGene00197296	20343	C09B7.6	1.60902	3.97236	2.82007	-1.4086	0.158953	NA
WBGene00014771	4771	F55G11.3	1.97721	3.97176	2.68858	-1.47727	0.139603	NA
WBGene00005772	19536	srw-25	3.71009	3.93759	2.38146	-1.65343	0.0982426	0.281077
WBGene00010473	213	hrg-2	2246.41	3.93454	0.237464	-16.569	1.16781e-61	1.0376e-58
WBGene00197147	16854	C09D8.7	0.961777	3.92093	3.6456	-1.07552	0.28214	NA
WBGene00200939	15937	F10F2.15	1.34834	3.92088	3.83131	-1.02338	0.306128	NA
WBGene00044479	18313	F15E6.10	8.03869	3.89586	1.83681	-2.12099	0.0339226	0.144496
WBGene00201165	11446	Y110A7A.23	0.700505	3.89235	5.29453	-0.735163	0.46224	NA
WBGene00005660	26727	srr-9	4.16336	3.86827	1.90911	-2.02622	0.0427423	0.168485
WBGene00219478	19438	Y105C5B.1418	0.439993	3.8631	5.97448	-0.6466	0.517891	NA
WBGene00044299	21792	C42D8.9	11.917	3.85043	1.02849	-3.74376	0.000181289	0.00226229
WBGene00198538	21899	H14E04.7	1.87645	3.84654	2.44473	-1.5734	0.115626	NA
WBGene00017334	6801	F10D2.8	12.0691	3.84176	1.42117	-2.70323	0.00686689	0.0459084
WBGene00021178	396	Y9C9A.8	86.4224	3.83898	0.546397	-7.02599	2.12549e-12	9.88741e-11
WBGene00018623	21726	F48G7.12	1.14171	3.83588	4.09163	-0.937495	0.348504	NA
WBGene00008633	8135	fbxa-18	16.4632	3.83426	1.42348	-2.69359	0.00706881	0.0469229
WBGene00219445	26421	C06H5.12	0.319109	3.83349	5.97503	-0.641586	0.521142	NA
WBGene00166839	35063	21ur-6691	0.426421	3.83349	5.97503	-0.641586	0.521142	NA
WBGene00219447	5981	C06H5.14	0.50581	3.83349	5.97503	-0.641585	0.521143	NA
WBGene00016204	2300	gsto-1	3586.25	3.82086	0.441088	-8.66235	4.62146e-18	4.04548e-16
WBGene00009523	8151	clec-165	110.726	3.81309	0.4942	-7.71568	1.20342e-14	6.92066e-13
WBGene00013837	5243	fbxa-30	58.1867	3.81178	0.413895	-9.20954	3.27532e-20	3.30695e-18
WBGene00005066	23008	srb-1	0.314076	3.80678	5.97553	-0.637062	0.524085	NA
WBGene00005507	26696	srh-303	0.314076	3.80678	5.97553	-0.637062	0.524085	NA
WBGene00008337	19583	C55A6.8	0.314076	3.80678	5.97553	-0.637062	0.524085	NA
WBGene00008637	23328	F10A3.12	0.314076	3.80678	5.97553	-0.637062	0.524085	NA
WBGene00008872	20506	F15H10.5	0.314076	3.80678	5.97553	-0.637062	0.524085	NA
WBGene00013396	16078	Y62H9A.8	0.314076	3.80678	5.97553	-0.637062	0.524085	NA
WBGene00014188	27303	ZK1025.8	0.314076	3.80678	5.97553	-0.637062	0.524085	NA
WBGene00019349	16133	trx-5	0.314076	3.80678	5.97553	-0.637062	0.524085	NA
WBGene00048281	16189	21ur-4742	0.314076	3.80678	5.97553	-0.637062	0.524085	NA
WBGene00172774	20718	21ur-9025	0.314076	3.80678	5.97553	-0.637062	0.524085	NA
WBGene00016690	19208	srbc-22	0.440861	3.80678	5.97553	-0.637062	0.524085	NA
WBGene00022011	23944	Y59H11AR.3	0.503285	3.80678	5.97553	-0.637062	0.524085	NA
WBGene00044013	28295	F15H10.9	0.561799	3.80678	5.97553	-0.637062	0.524085	NA
WBGene00044095	24047	srh-121	0.520429	3.80678	5.97553	-0.637062	0.524085	NA
WBGene00255550	18455	W03D8.14	0.900788	3.80678	5.97553	-0.637062	0.524085	NA
WBGene00009464	23353	F36D1.5	0.823974	3.80678	5.97553	-0.637062	0.524085	NA
WBGene00018190	20105	F38H12.5	0.90438	3.80678	5.97553	-0.637062	0.524085	NA
WBGene00005570	15533	sri-58	0.383111	3.80678	5.97553	-0.637062	0.524085	NA
WBGene00047447	30253	21ur-471	0.374545	3.80678	5.97553	-0.637062	0.524085	NA
WBGene00008813	16036	srz-2	0.60551	3.80678	5.97553	-0.637061	0.524085	NA
WBGene00005325	15990	srh-106	0.780828	3.80677	5.97552	-0.637061	0.524085	NA
WBGene00195049	25030	CC8.3	0.815075	3.80676	5.95388	-0.639375	0.522579	NA
WBGene00171590	24795	21ur-9326	0.624738	3.80641	5.48716	-0.693694	0.487874	NA
WBGene00044366	10389	nspf-3	0.880299	3.80604	5.10656	-0.745323	0.456076	NA
WBGene00010023	16046	srbc-51	0.968441	3.80579	4.89916	-0.776825	0.437262	NA
WBGene00012334	22639	W07G1.7	1.25701	3.80563	4.77465	-0.797048	0.425423	NA
WBGene00003665	18516	nhr-75	1.07989	3.80563	4.77293	-0.797336	0.425256	NA
WBGene00022006	15321	mpst-5	1.15902	3.8051	4.4365	-0.857681	0.391069	NA
WBGene00021013	16144	W03G1.8	0.942973	3.80488	4.32068	-0.880619	0.378524	NA
WBGene00006025	21026	srx-134	1.18263	3.80432	4.06318	-0.936291	0.349123	NA
WBGene00200121	25947	F40H3.14	1.03668	3.80363	3.81079	-0.998122	0.31822	NA
WBGene00013980	6742	dos-1	52.9794	3.80307	0.6188	-6.14589	7.95179e-10	2.68638e-08
WBGene00017725	16124	F22H10.1	1.9966	3.80123	3.23073	-1.17658	0.239362	NA
WBGene00008308	12088	C54E10.3	2.93576	3.80098	3.18642	-1.19287	0.232921	NA
WBGene00005315	22523	srh-95	1.60749	3.80046	3.10333	-1.22464	0.220711	NA
WBGene00006435	10077	stdh-4	2.34456	3.79514	2.56351	-1.48044	0.138755	NA
WBGene00219327	10963	ZK822.9	10.1993	3.79244	1.24957	-3.03499	0.00240543	0.0200021
WBGene00021620	22320	Y47D7A.7	6.66616	3.78544	2.14303	-1.7664	0.0773288	0.244638
WBGene00009104	19599	F25C8.1	91.6638	3.78054	1.10628	-3.41733	0.000632379	0.00661801
WBGene00014134	284	ZK896.3	131.079	3.76882	0.468675	-8.04144	8.87904e-16	5.84373e-14
WBGene00006286	21038	str-260	2.97489	3.76099	2.41404	-1.55797	0.119241	NA
WBGene00017878	17714	F28A10.10	0.300558	3.74444	5.97673	-0.626503	0.530985	NA
WBGene00200298	25982	T02C12.8	0.354214	3.74444	5.97673	-0.626503	0.530985	NA
WBGene00005786	23171	srw-39	0.399651	3.74444	5.97673	-0.626503	0.530985	NA
WBGene00005678	26732	sru-15	0.515181	3.74444	5.97673	-0.626503	0.530985	NA
WBGene00005466	23106	srh-260	0.532171	3.74443	5.97673	-0.626502	0.530986	NA
WBGene00010206	17106	F57G4.1	5.44764	3.74404	4.8989	-0.764262	0.444711	0.669043
WBGene00010715	19624	K09C8.2	0.817559	3.74373	4.39069	-0.852651	0.393853	NA
WBGene00023465	28276	srz-81	1.29214	3.74286	3.58467	-1.04413	0.296426	NA
WBGene00020291	23881	T06D4.2	1.21464	3.74248	3.3645	-1.11234	0.265991	NA
WBGene00008759	20028	F13E9.10	1.61492	3.74246	3.35731	-1.11472	0.264971	NA
WBGene00195179	8454	F48C1.11	3.03743	3.74242	3.33352	-1.12266	0.261581	NA
WBGene00005201	23037	srg-44	1.25752	3.74219	3.22876	-1.15902	0.246449	NA
WBGene00012533	1741	fbxa-209	83.0548	3.74061	0.503538	-7.42865	1.0971e-13	5.70043e-12
WBGene00001957	10512	hlh-13	4.19034	3.73817	2.34763	-1.59232	0.111313	0.303101
WBGene00021623	6887	Y47D7A.11	4.15956	3.73763	2.28968	-1.63238	0.102599	0.288843
WBGene00007427	10580	C08B6.6	2.363	3.73742	2.27024	-1.64627	0.099708	NA
WBGene00008492	151	F01D5.1	385.809	3.73545	0.377707	-9.88981	4.6089e-23	6.25192e-21
WBGene00015033	7251	B0207.10	3.27299	3.73371	2.21968	-1.68209	0.0925511	0.271432
WBGene00006224	7595	str-180	8.7842	3.72586	1.7698	-2.10524	0.03527	0.148448
WBGene00170473	15384	21ur-5750	1.26054	3.71133	2.44352	-1.51885	0.128801	NA
WBGene00206358	14949	F46E10.18	5.85057	3.70257	1.85914	-1.99155	0.0464205	0.177287
WBGene00016013	8282	ugt-66	153.088	3.69083	0.438514	-8.41667	3.87324e-17	3.059e-15
WBGene00235285	19449	F56D6.18	1.72946	3.68352	2.4156	-1.52488	0.127288	NA
WBGene00018169	19726	nspb-2	3.03863	3.68341	2.43599	-1.51208	0.130514	NA
WBGene00086565	8925	W06G6.17	79.9394	3.68303	0.391765	-9.40113	5.39785e-21	5.84877e-19
WBGene00170452	6942	21ur-10676	1.43811	3.68275	2.57623	-1.42951	0.152858	NA
WBGene00008297	17069	cdr-3	2.47886	3.68247	2.64974	-1.38975	0.164605	NA
WBGene00003099	8031	lys-10	2.03409	3.68188	2.83955	-1.29664	0.194754	NA
WBGene00005780	13552	srw-33	2.18876	3.68166	2.92527	-1.25857	0.208185	NA
WBGene00005957	23214	srx-66	1.75705	3.68087	3.35581	-1.09686	0.272701	NA
WBGene00017963	11779	F31F4.17	1.69495	3.68082	3.3865	-1.08691	0.277076	NA
WBGene00012055	11679	srsx-36	1.08157	3.68052	3.64847	-1.00878	0.313079	NA
WBGene00018825	12780	F54E2.5	1.07966	3.68046	3.70284	-0.993955	0.320245	NA
WBGene00044575	14359	F38B6.8	1.13627	3.68027	3.91421	-0.940232	0.347098	NA
WBGene00195322	21333	T06E4.16	0.976996	3.67982	4.62186	-0.796176	0.425929	NA
WBGene00013817	19664	Y116F11A.3	0.757103	3.67961	5.15229	-0.71417	0.475122	NA
WBGene00005859	23190	srw-112	0.704498	3.67957	5.29519	-0.694888	0.487125	NA
WBGene00008552	20025	srsx-31	0.384733	3.67939	5.97803	-0.615485	0.538235	NA
WBGene00170580	38388	21ur-6311	0.508429	3.67939	5.97803	-0.615485	0.538235	NA
WBGene00018378	7832	F43C11.1	2.40466	3.67939	5.95486	-0.617879	0.536655	NA
WBGene00006150	18036	str-92	0.555877	3.67938	5.97803	-0.615484	0.538235	NA
WBGene00195209	22890	C07B5.8	1.44874	3.64914	3.38053	-1.07946	0.280384	NA
WBGene00010124	205	F55G11.4	1991.2	3.64869	0.29816	-12.2373	1.96389e-34	5.13212e-32
WBGene00022563	12355	ZC204.13	0.916814	3.64721	4.27479	-0.85319	0.393554	NA
WBGene00018834	17228	F54F2.6	0.587017	3.64673	4.66281	-0.78209	0.434162	NA
WBGene00005938	18034	srx-47	3.09264	3.63396	2.15515	-1.68618	0.0917619	NA
WBGene00016347	23728	C33E10.5	2.12044	3.62044	2.87787	-1.25803	0.208382	NA
WBGene00005616	1591	srj-29	17.7337	3.61996	1.29926	-2.78616	0.00533363	0.0377453
WBGene00017645	21704	F20D12.7	1.90803	3.61783	3.20921	-1.12733	0.259604	NA
WBGene00021081	2907	pals-33	180.909	3.61548	0.523495	-6.90643	4.97016e-12	2.18613e-10
WBGene00015564	17185	C07D8.5	1.30996	3.61542	3.70018	-0.977094	0.328522	NA
WBGene00077504	19354	AC3.13	1.58568	3.61466	3.92133	-0.921795	0.356636	NA
WBGene00005585	21015	sri-73	1.09009	3.61459	3.94704	-0.915772	0.359786	NA
WBGene00009210	23346	F28C12.6	1.55716	3.61458	3.94984	-0.915121	0.360128	NA
WBGene00249816	46785	F42G8.18	1.24359	3.61376	4.25521	-0.849255	0.395739	NA
WBGene00219418	22936	F44D12.19	1.34002	3.6132	4.52634	-0.798261	0.424719	NA
WBGene00201196	20880	F46E10.15	0.672827	3.61316	4.54036	-0.795788	0.426155	NA
WBGene00000688	11490	col-114	0.948835	3.61272	4.80057	-0.75256	0.451714	NA
WBGene00197432	9958	T21G5.7	0.541972	3.61262	4.86663	-0.742325	0.457891	NA
WBGene00007895	18565	C33D3.4	1.54568	3.61254	4.92159	-0.734018	0.462938	NA
WBGene00235258	17952	T05C7.5	0.917957	3.6123	5.09767	-0.708616	0.478563	NA
WBGene00021958	19311	Y57E12AL.4	0.722242	3.6121	5.25727	-0.687067	0.49204	NA
WBGene00021949	23939	clec-164	1.07789	3.61162	5.72656	-0.630679	0.528251	NA
WBGene00202086	17427	F45E10.3	0.333991	3.61141	5.97947	-0.603968	0.545865	NA
WBGene00195530	25095	T04G9.8	0.327178	3.61141	5.97947	-0.603968	0.545865	NA
WBGene00174634	21323	21ur-12951	0.368127	3.61141	5.97947	-0.603968	0.545865	NA
WBGene00005962	26815	srx-71	0.273522	3.61141	5.97947	-0.603968	0.545865	NA
WBGene00023396	28266	Y94H6A.t1	0.273522	3.61141	5.97947	-0.603968	0.545865	NA
WBGene00044106	24051	srbc-84	0.273522	3.61141	5.97947	-0.603968	0.545865	NA
WBGene00195477	20746	Y57G11C.1136	0.273522	3.61141	5.97947	-0.603968	0.545865	NA
WBGene00195691	42566	C35D10.18	0.273522	3.61141	5.97947	-0.603968	0.545865	NA
WBGene00198076	43916	R13H7.19	0.273522	3.61141	5.97947	-0.603968	0.545865	NA
WBGene00198437	15922	H03A11.8	0.273522	3.61141	5.97947	-0.603968	0.545865	NA
WBGene00201911	46078	F43E12.7	0.273522	3.61141	5.97947	-0.603968	0.545865	NA
WBGene00011389	23473	T02G6.6	0.69077	3.61141	5.97947	-0.603968	0.545865	NA
WBGene00018053	18735	srbc-3	0.394461	3.61141	5.97947	-0.603968	0.545865	NA
WBGene00196495	16309	T22B7.10	0.380834	3.61141	5.97947	-0.603968	0.545865	NA
WBGene00173230	40705	21ur-6569	0.403065	3.61141	5.97947	-0.603968	0.545865	NA
WBGene00198991	25729	T05G5.15	0.420061	3.61141	5.97947	-0.603968	0.545865	NA
WBGene00011025	17122	R05A10.8	0.471605	3.61141	5.97947	-0.603968	0.545865	NA
WBGene00023400	28268	ZK380.3	0.488145	3.61141	5.97947	-0.603968	0.545865	NA
WBGene00006161	17036	str-109	0.589845	3.61141	5.97947	-0.603968	0.545865	NA
WBGene00005086	26592	srd-8	0.748153	3.61141	5.97947	-0.603968	0.545865	NA
WBGene00219664	9977	linc-73	0.899543	3.61141	5.97947	-0.603968	0.545865	NA
WBGene00020607	12812	srab-20	0.866626	3.61141	5.97947	-0.603968	0.545865	NA
WBGene00019306	23845	K02E7.1	0.616075	3.61141	5.97947	-0.603968	0.545865	NA
WBGene00006176	20491	str-125	0.620442	3.6114	5.97947	-0.603968	0.545865	NA
WBGene00199797	21908	C54G7.14	0.827521	3.6114	5.97947	-0.603968	0.545865	NA
WBGene00012870	9221	Y45F10B.2	3.61196	3.60966	1.6797	-2.149	0.0316345	0.13731
WBGene00219847	26837	C34E11.20	1.4505	3.59971	3.4333	-1.04847	0.294421	NA
WBGene00020698	1896	T22F3.8	60.0988	3.59619	0.600912	-5.98456	2.16974e-09	6.94709e-08
WBGene00008245	10111	fipr-10	37.7896	3.5926	1.13695	-3.15985	0.0015785	0.0142314
WBGene00007541	12063	fipr-4	17.5416	3.5911	1.42627	-2.51784	0.0118079	0.0683249
WBGene00045493	11892	F55G7.4	14.7658	3.58715	1.61785	-2.21724	0.0266069	0.121888
WBGene00206513	26398	B0244.15	6.39693	3.58618	1.2991	-2.7605	0.00577121	0.0401387
WBGene00021494	23922	Y40B10B.1	3.94218	3.57218	4.62766	-0.771918	0.440163	0.665038
WBGene00009047	165	F22B8.4	218.39	3.55793	0.247624	-14.3683	8.18287e-47	3.58167e-44
WBGene00194799	42287	Y70C5A.4	0.391273	3.54338	5.98097	-0.592442	0.553555	NA
WBGene00005525	21508	sri-13	0.688398	3.54338	5.98097	-0.592442	0.553555	NA
WBGene00167825	24615	21ur-6602	0.310576	3.54338	5.98097	-0.592442	0.553555	NA
WBGene00197985	980	K04A8.15	0.598338	3.54338	5.98097	-0.592442	0.553555	NA
WBGene00198128	25572	F59G1.11	0.616037	3.54293	5.48503	-0.645927	0.518327	NA
WBGene00255564	16961	mir-8206	0.6847	3.54287	5.43097	-0.652345	0.514179	NA
WBGene00197716	25495	H15M21.1	0.840855	3.54242	5.06619	-0.699229	0.484409	NA
WBGene00013471	23556	clec-242	1.00011	3.54217	4.88686	-0.724836	0.468553	NA
WBGene00235273	7979	T11F8.12	10.0351	3.5296	1.34209	-2.62993	0.00854034	0.0540848
WBGene00018267	6819	F41C3.1	19.0772	3.52393	1.06751	-3.30108	0.000963117	0.00937786
WBGene00007368	13582	C06B8.2	136.706	3.51505	0.408067	-8.6139	7.0617e-18	6.033e-16
WBGene00050974	9429	Y6G8.9	4.23001	3.50787	1.987	-1.76541	0.0774948	0.244945
WBGene00219287	7969	F36D1.23	11.0319	3.50735	1.54107	-2.27592	0.022851	0.110134
WBGene00196284	42896	F26A10.9	0.453156	3.50641	5.98181	-0.586178	0.557756	NA
WBGene00197470	25458	F29B9.14	0.308627	3.50641	5.98181	-0.586178	0.557756	NA
WBGene00022403	23949	Y97E10B.1	0.492082	3.50641	5.98181	-0.586178	0.557756	NA
WBGene00005327	26636	srh-108	0.597259	3.5064	5.98181	-0.586177	0.557756	NA
WBGene00016302	3788	fbxc-7	12.5882	3.50324	1.0975	-3.19201	0.00141287	0.012955
WBGene00043991	28294	mir-258.2	1.29096	3.50116	3.04353	-1.15036	0.249995	NA
WBGene00003352	4547	mir-258.1	1.35071	3.49755	2.57834	-1.35651	0.174935	NA
WBGene00017756	10291	F23F12.12	520.872	3.49294	0.444098	-7.86525	3.6835e-15	2.28867e-13
WBGene00000468	15972	ces-1	6.58203	3.47851	2.0381	-1.70675	0.0878695	0.263268
WBGene00011163	15633	chil-20	7.00259	3.4711	1.51584	-2.28988	0.0220282	0.107244
WBGene00013298	23549	Y57G11B.6	2.61203	3.47079	3.0419	-1.14099	0.253873	NA
WBGene00168183	24633	21ur-8585	0.248212	3.46852	5.9827	-0.579757	0.562078	NA
WBGene00167697	35846	21ur-9774	0.297058	3.46851	5.9827	-0.579757	0.562078	NA
WBGene00198873	11946	F10C2.11	0.419356	3.46851	5.9827	-0.579756	0.562079	NA
WBGene00020805	6868	T25F10.1	0.560522	3.46843	5.59226	-0.620219	0.535113	NA
WBGene00013707	12684	Y106G6E.3	1.6178	3.46118	3.37829	-1.02454	0.305582	NA
WBGene00189944	14888	E03A3.10	10.4871	3.4557	1.08654	-3.18047	0.00147036	0.0134266
WBGene00018652	12268	F49F1.12	6.87868	3.45187	1.43939	-2.39815	0.0164779	0.0868404
WBGene00010655	6679	K08D8.1	27.1125	3.45167	0.863593	-3.99688	6.41838e-05	0.000904477
WBGene00201646	20415	ZC412.13	3.62181	3.45116	1.83446	-1.8813	0.059931	0.209558
WBGene00206354	1985	F27E5.9	294.688	3.44219	0.47763	-7.20681	5.72785e-13	2.79626e-11
WBGene00009859	21079	clec-33	4.00598	3.43663	2.33649	-1.47085	0.141331	0.349443
WBGene00022725	6907	ZK381.2	2.29783	3.43321	2.13458	-1.60838	0.107752	NA
WBGene00021085	18804	W08E12.4	1.45908	3.4316	2.58031	-1.32992	0.183546	NA
WBGene00220039	20445	R10A10.3	0.241453	3.42965	5.98364	-0.573171	0.566529	NA
WBGene00045179	28461	F01G10.11	0.290299	3.42965	5.98364	-0.573171	0.566529	NA
WBGene00045315	28482	Y116A8C.52	0.387992	3.42965	5.98364	-0.573171	0.566529	NA
WBGene00046222	13371	21ur-5453	0.429803	3.42965	5.98364	-0.573171	0.566529	NA
WBGene00008943	15096	srz-36	5.31813	3.42401	1.91911	-1.78416	0.0743971	0.239196
WBGene00000756	15477	col-183	6.64491	3.42332	1.87061	-1.83005	0.067242	0.224224
WBGene00008301	3635	pals-39	161.04	3.41653	0.421326	-8.10898	5.10484e-16	3.48896e-14
WBGene00005187	13544	srg-30	3.68533	3.40173	1.91945	-1.77224	0.0763545	0.242766
WBGene00219776	17943	AH9.9	0.816272	3.39118	4.33054	-0.783085	0.433577	NA
WBGene00200600	21919	C08G9.9	0.28835	3.38976	5.98463	-0.566411	0.571114	NA
WBGene00008870	16568	F15H9.1	7.67981	3.37391	1.58094	-2.13411	0.0328336	0.140829
WBGene00077497	13375	K06A4.10	14.2232	3.36706	1.01918	-3.30369	0.000954201	0.00930634
WBGene00013207	274	zipt-2.3	567.597	3.36173	0.23398	-14.3676	8.26383e-47	3.58167e-44
WBGene00044270	12366	F35E2.10	10.4664	3.36048	1.574	-2.135	0.032761	0.140619
WBGene00017097	9795	E02C12.12	1.22055	3.3593	4.71742	-0.712105	0.4764	NA
WBGene00008354	12089	gcsh-1	765.024	3.3565	0.382558	-8.77385	1.72663e-18	1.56542e-16
WBGene00170169	21308	21ur-6607	0.227935	3.3488	5.98567	-0.559469	0.575842	NA
WBGene00199334	12434	T27E4.20	0.227935	3.3488	5.98567	-0.559469	0.575842	NA
WBGene00172406	16814	21ur-15622	0.388902	3.3488	5.98567	-0.559469	0.575842	NA
WBGene00200358	21916	C17G1.13	0.42332	3.3488	5.98567	-0.559469	0.575842	NA
WBGene00201757	16425	C25H3.20	0.42332	3.3488	5.98567	-0.559469	0.575842	NA
WBGene00195609	20748	Y41C4A.23	0.523285	3.34879	5.98567	-0.559469	0.575842	NA
WBGene00199840	20386	K10C3.12	0.507986	3.34879	5.98567	-0.559468	0.575842	NA
WBGene00019376	367	lipl-4	57.3697	3.33465	0.518684	-6.42905	1.28404e-10	4.74599e-09
WBGene00016556	7799	math-21	15.7379	3.33102	0.973004	-3.42345	0.000618327	0.00650543
WBGene00219766	9470	anr-42	2.11477	3.32166	2.35453	-1.41075	0.158317	NA
WBGene00015932	803	C17H12.6	296.747	3.31752	0.299452	-11.0786	1.59284e-28	3.0766e-26
WBGene00008944	5140	F19B2.5	4354.34	3.28422	0.201882	-16.268	1.66511e-59	1.18356e-56
WBGene00175027	11915	W02F12.8	9.89448	3.27614	1.45279	-2.25507	0.024129	0.11434
WBGene00019348	15766	K02H11.4	7.0876	3.26568	1.3251	-2.46447	0.0137217	0.0761267
WBGene00194895	21329	ZK105.11	6.68001	3.24643	2.133	-1.522	0.128009	0.330274
WBGene00077660	24457	Y17D7B.9	1.43049	3.23146	2.6864	-1.2029	0.229016	NA
WBGene00194657	12906	T07D10.10	3.56055	3.23013	1.9275	-1.67582	0.093774	0.273399
WBGene00008680	6632	F11A5.15	129.685	3.22871	0.418599	-7.71313	1.22768e-14	6.99229e-13
WBGene00005225	26615	srg-68	0.209384	3.2209	5.98913	-0.537791	0.590721	NA
WBGene00013626	23563	srz-54	0.209384	3.2209	5.98913	-0.537791	0.590721	NA
WBGene00048792	31441	21ur-2413	0.209384	3.2209	5.98913	-0.537791	0.590721	NA
WBGene00195427	20286	F02A9.8	0.209384	3.2209	5.98913	-0.537791	0.590721	NA
WBGene00196401	42953	F27B10.2	0.209384	3.2209	5.98913	-0.537791	0.590721	NA
WBGene00199474	44685	ZK836.12	0.209384	3.2209	5.98913	-0.537791	0.590721	NA
WBGene00200863	45484	Y69E1A.13	0.209384	3.2209	5.98913	-0.537791	0.590721	NA
WBGene00201381	20888	C08G5.9	0.209384	3.2209	5.98913	-0.537791	0.590721	NA
WBGene00219293	16443	B0334.20	0.209384	3.2209	5.98913	-0.537791	0.590721	NA
WBGene00255733	26926	T02B11.13	0.209384	3.2209	5.98913	-0.537791	0.590721	NA
WBGene00195858	42660	F48C11.6	0.348888	3.2209	5.98913	-0.537791	0.590721	NA
WBGene00022443	15830	Y110A2AL.6	0.347454	3.2209	5.98913	-0.537791	0.590721	NA
WBGene00045309	24127	srg-52	0.347454	3.2209	5.98913	-0.537791	0.590721	NA
WBGene00235118	26905	K04A8.18	0.307076	3.2209	5.98913	-0.537791	0.590721	NA
WBGene00003701	26557	nhr-111	0.336169	3.2209	5.98913	-0.537791	0.590721	NA
WBGene00005329	26637	srh-110	0.336169	3.2209	5.98913	-0.537791	0.590721	NA
WBGene00196685	43128	T14F9.11	0.316695	3.2209	5.98913	-0.537791	0.590721	NA
WBGene00049238	16198	21ur-598	0.407467	3.2209	5.98913	-0.537791	0.590721	NA
WBGene00220028	26868	M03A8.6	0.407467	3.2209	5.98913	-0.537791	0.590721	NA
WBGene00022982	23980	F09E10.10	0.404769	3.2209	5.98913	-0.537791	0.590721	NA
WBGene00001920	15976	his-46	0.429364	3.2209	5.98913	-0.537791	0.590721	NA
WBGene00009298	27106	srz-58	0.843633	3.2209	5.98913	-0.537791	0.590721	NA
WBGene00006151	23249	str-93	0.514881	3.2209	5.98913	-0.537791	0.590721	NA
WBGene00077785	17333	F35E2.11	0.542838	3.2209	5.98913	-0.537791	0.590721	NA
WBGene00202500	12445	K09H11.15	0.51101	3.2209	5.98913	-0.537791	0.590721	NA
WBGene00219416	26420	F23H12.21	0.592777	3.2209	5.98913	-0.537791	0.590721	NA
WBGene00014358	27370	F28H6.t5	0.714298	3.2209	5.98913	-0.537791	0.590721	NA
WBGene00048209	30929	21ur-1063	0.506509	3.2209	5.98913	-0.537791	0.590722	NA
WBGene00044441	14353	Y119C1B.11	0.587434	3.2209	5.98913	-0.537791	0.590722	NA
WBGene00194689	20734	Y38H6C.24	0.584565	3.2209	5.98913	-0.537791	0.590722	NA
WBGene00016471	23735	srab-8	0.583215	3.2209	5.98913	-0.537791	0.590722	NA
WBGene00199858	25907	C40H5.15	0.279136	3.2209	5.98913	-0.537791	0.590722	NA
WBGene00005680	19533	sru-17	0.258905	3.2209	5.98913	-0.537791	0.590722	NA
WBGene00014827	27638	T01B7.1	0.379843	3.2209	5.98913	-0.537791	0.590722	NA
WBGene00199859	44912	F58H1.22	0.466959	3.2209	5.98913	-0.537791	0.590722	NA
WBGene00007292	27038	C04B4.4	0.401776	3.2209	5.98913	-0.537791	0.590722	NA
WBGene00009910	20038	srz-92	0.498119	3.2209	5.98913	-0.537791	0.590722	NA
WBGene00012820	22137	Y43F8B.10	0.528561	3.2209	5.98913	-0.537791	0.590722	NA
WBGene00198201	17388	F59H5.5	0.640322	3.2209	5.98913	-0.537791	0.590722	NA
WBGene00045068	11887	C08F11.16	0.445268	3.22089	5.98913	-0.53779	0.590722	NA
WBGene00005221	26613	srg-64	0.625286	3.22089	5.98913	-0.53779	0.590722	NA
WBGene00173663	24923	21ur-9869	0.573688	3.22089	5.98913	-0.53779	0.590722	NA
WBGene00005027	18526	sra-1	0.732811	3.22021	5.39478	-0.596912	0.550566	NA
WBGene00005307	26629	srh-86	0.708086	3.22018	5.37508	-0.599095	0.54911	NA
WBGene00194842	10424	W10G6.5	0.764843	3.22004	5.28097	-0.609745	0.542031	NA
WBGene00005480	17025	srh-275	0.873801	3.21996	5.22383	-0.616397	0.537633	NA
WBGene00077638	20212	Y6G8.13	0.903801	3.21984	5.15177	-0.624997	0.531973	NA
WBGene00021067	17776	W06H8.4	0.961345	3.21947	4.93747	-0.652049	0.51437	NA
WBGene00019384	18232	K04F1.1	1.07001	3.21905	4.7201	-0.681987	0.495247	NA
WBGene00008901	19078	nhr-27	1.03658	3.21901	4.70471	-0.684211	0.493842	NA
WBGene00013608	6258	clec-35	18.7784	3.21856	0.872371	-3.68944	0.000224744	0.00272421
WBGene00044610	20632	D2092.10	1.10848	3.21789	4.26931	-0.753726	0.451014	NA
WBGene00050968	33347	R11G10.4	1.24396	3.21716	4.04467	-0.795406	0.426378	NA
WBGene00021090	14794	W08E12.9	0.855449	3.21676	3.94052	-0.816328	0.414313	NA
WBGene00005169	20479	srg-11	1.2563	3.21674	3.93566	-0.817332	0.413739	NA
WBGene00021519	409	Y41D4B.17	34.2446	3.21599	0.892455	-3.60353	0.000313925	0.00363417
WBGene00219549	19931	F59A1.19	1.31987	3.21508	3.58577	-0.896623	0.36992	NA
WBGene00017521	9807	F16G10.6	1.73551	3.21466	3.51338	-0.914979	0.360203	NA
WBGene00018539	20109	nhr-185	1.70422	3.21391	3.39504	-0.946649	0.343818	NA
WBGene00022710	10872	ZK354.9	1.72593	3.21317	3.29092	-0.976373	0.32888	NA
WBGene00010543	10641	K03H1.8	1.89831	3.21244	3.20009	-1.00386	0.315447	NA
WBGene00011567	27181	nhr-215	1.66693	3.21241	3.197	-1.00482	0.314985	NA
WBGene00086553	3472	ZC334.13	2.88291	3.2112	3.06627	-1.04727	0.294976	NA
WBGene00012414	16068	Y7A5A.8	1.75024	3.21074	3.02178	-1.06253	0.287993	NA
WBGene00166564	24567	21ur-10979	1.27544	3.21052	3.98465	-0.80572	0.420404	NA
WBGene00015986	11224	C18G1.8	2.07838	3.20959	2.91936	-1.09941	0.271587	NA
WBGene00013120	19652	fipr-28	2.9363	3.20759	1.83565	-1.74738	0.0805708	NA
WBGene00007384	19052	swt-3	844.308	3.20455	0.24433	-13.1157	2.67808e-39	8.34902e-37
WBGene00189931	21860	Y26G10.6	2.3922	3.20429	2.58081	-1.24158	0.214391	NA
WBGene00003664	13017	nhr-74	232.901	3.19978	0.270539	-11.8274	2.81713e-32	6.76491e-30
WBGene00010274	6670	F58G6.3	815.319	3.19936	0.419635	-7.62414	2.4567e-14	1.37282e-12
WBGene00195048	23443	K08D10.13	2.62746	3.19792	2.24242	-1.4261	0.15384	NA
WBGene00012609	10678	Y38F1A.7	11.8387	3.19606	1.16078	-2.75337	0.00589844	0.0408636
WBGene00195212	21866	F09B12.7	7.92162	3.19385	1.3423	-2.37938	0.0173416	0.0901578
WBGene00045109	28425	smy-2	0.704508	3.18099	5.96207	-0.533538	0.593661	NA
WBGene00166274	20686	21ur-11916	1.6672	3.17628	2.41642	-1.31446	0.188692	NA
WBGene00007656	11085	pals-2	14.5417	3.17585	1.59194	-1.99496	0.0460472	0.176415
WBGene00195591	18896	R53.9	0.407297	3.17478	5.99045	-0.529974	0.59613	NA
WBGene00018771	18751	duox-2	13.2247	3.17404	1.04665	-3.03256	0.00242489	0.0201262
WBGene00006643	2617	tsp-17	37.4934	3.16402	0.46299	-6.83389	8.2645e-12	3.54735e-10
WBGene00007864	129	irg-6	8.3544	3.15948	1.37684	-2.29474	0.0217479	0.10615
WBGene00005366	9069	srh-150	2.49092	3.14583	1.82945	-1.71955	0.0855143	NA
WBGene00195164	11921	K12B6.11	33.2045	3.13157	0.720395	-4.34703	1.37996e-05	0.000231776
WBGene00005183	23033	srg-26	0.195866	3.12724	5.99186	-0.521915	0.601729	NA
WBGene00022826	27955	ZK816.3	0.195866	3.12724	5.99186	-0.521915	0.601729	NA
WBGene00005888	16010	srw-141	0.359679	3.12724	5.99186	-0.521915	0.601729	NA
WBGene00022001	23943	thn-7	0.498562	3.12724	5.99186	-0.521915	0.601729	NA
WBGene00010534	20518	fbxa-102	0.508181	3.12724	5.99186	-0.521915	0.601729	NA
WBGene00018234	21180	F40E12.1	0.294908	3.12724	5.99186	-0.521915	0.601729	NA
WBGene00044104	24050	srbc-53	0.294908	3.12724	5.99186	-0.521915	0.601729	NA
WBGene00001900	22971	his-26	0.316804	3.12724	5.99186	-0.521915	0.601729	NA
WBGene00014983	19677	ZK228.t1	0.329673	3.12724	5.99186	-0.521915	0.601729	NA
WBGene00170986	21314	21ur-6990	0.355428	3.12724	5.99186	-0.521915	0.601729	NA
WBGene00005406	23092	srh-193	0.532121	3.12724	5.99186	-0.521915	0.601729	NA
WBGene00201693	18930	Y38F2AL.11	0.35119	3.12724	5.99186	-0.521915	0.601729	NA
WBGene00018276	27808	F41C6.2	0.335094	3.12724	5.99186	-0.521915	0.601729	NA
WBGene00005456	21010	srh-250	0.458501	3.12724	5.99186	-0.521915	0.601729	NA
WBGene00195494	42458	F48C11.5	0.289217	3.12724	5.99186	-0.521915	0.601729	NA
WBGene00013470	23555	clec-243	0.50508	3.12724	5.99185	-0.521915	0.60173	NA
WBGene00005033	23002	sra-7	0.53694	3.12721	5.55342	-0.563115	0.573357	NA
WBGene00015758	21673	nhr-155	0.827947	3.12718	5.14425	-0.607897	0.543256	NA
WBGene00018551	21186	F47C12.8	0.889219	3.12717	5.09034	-0.614335	0.538994	NA
WBGene00005971	11567	srx-80	0.857772	3.12717	5.11687	-0.61115	0.541101	NA
WBGene00015069	18162	srt-67	0.872212	3.12717	5.08197	-0.615346	0.538326	NA
WBGene00077592	17331	T25B2.3	0.560264	3.12714	4.79941	-0.651567	0.514681	NA
WBGene00005526	22007	sri-14	1.15055	3.12713	4.75162	-0.658118	0.510462	NA
WBGene00023468	28278	B0412.6	0.571467	3.12712	4.69623	-0.665879	0.505488	NA
WBGene00044960	24098	fbxa-173	0.620849	3.1271	4.56837	-0.684512	0.493652	NA
WBGene00050710	33175	21ur-5322	0.705266	3.12707	4.42879	-0.706078	0.48014	NA
WBGene00021257	20123	Y22D7AR.3	0.714701	3.12707	4.37435	-0.714865	0.474692	NA
WBGene00045460	19347	C15C8.8	0.809421	3.12706	4.30544	-0.726303	0.467653	NA
WBGene00219763	20439	linc-94	0.969401	3.12704	4.25649	-0.734653	0.462551	NA
WBGene00008539	15086	F02H6.6	0.844334	3.12704	4.21146	-0.742507	0.45778	NA
WBGene00011158	23462	chil-16	0.899117	3.12701	4.14209	-0.754937	0.450287	NA
WBGene00006026	15539	srx-135	1.86997	3.12694	3.82027	-0.818511	0.413066	NA
WBGene00219612	26435	linc-153	1.30306	3.12687	3.63269	-0.860758	0.389371	NA
WBGene00003770	21995	nlp-32	1.1202	3.12683	3.54357	-0.882397	0.377562	NA
WBGene00005097	23016	srd-19	1.86205	3.12672	3.28711	-0.951205	0.3415	NA
WBGene00022605	10867	dmsr-11	1.83614	3.12657	3.051	-1.02477	0.305472	NA
WBGene00206365	17431	B0563.18	1.61973	3.12654	3.01734	-1.03619	0.300114	NA
WBGene00005484	14531	srh-279	2.57985	3.12642	2.88183	-1.08487	0.277977	NA
WBGene00198855	15927	F59G1.12	1.26377	3.1263	2.74993	-1.13686	0.255595	NA
WBGene00006086	5081	str-19	1.96428	3.12629	2.74175	-1.14025	0.25418	NA
WBGene00009611	12607	F41D3.6	2.18189	3.12623	2.6925	-1.16109	0.245607	NA
WBGene00016464	6782	C36B7.1	1.8494	3.12618	2.64906	-1.18011	0.237957	NA
WBGene00004992	22999	spp-7	4.02219	3.12607	2.57276	-1.21507	0.224341	0.458223
WBGene00012266	18653	W04G5.5	2.11208	3.12605	2.55524	-1.22339	0.221183	NA
WBGene00008057	23306	irld-25	1.42559	3.12598	2.50962	-1.2456	0.212912	NA
WBGene00010718	21597	K09C8.8	2.39307	3.12589	2.45555	-1.27299	0.203021	NA
WBGene00012215	21101	W02D9.9	2.17496	3.12532	2.20396	-1.41805	0.156176	NA
WBGene00013646	19662	Y105C5B.3	107.251	3.12424	0.438133	-7.13079	9.97938e-13	4.76703e-11
WBGene00015522	298	C06E1.7	43.4911	3.12007	0.665628	-4.6874	2.76694e-06	5.35604e-05
WBGene00022713	18293	ZK355.3	5.82533	3.11832	1.52861	-2.03997	0.0413535	0.165432
WBGene00003683	2055	nhr-93	22.9277	3.11651	0.839061	-3.71429	0.000203778	0.00250251
WBGene00236806	4985	D2024.18	1.90432	3.11409	3.14248	-0.990965	0.321703	NA
WBGene00009257	3657	F29G6.1	53.0063	3.10574	0.471364	-6.58884	4.4328e-11	1.78215e-09
WBGene00022733	9903	tmem-17	3.08793	3.10373	1.60555	-1.93312	0.0532214	NA
WBGene00015368	7258	srt-65	5.01298	3.10298	1.54923	-2.00292	0.0451863	0.174254
WBGene00219646	6475	linc-89	7.3402	3.10084	1.62085	-1.9131	0.0557355	0.200044
WBGene00008030	4130	scl-8	3.39469	3.092	2.34572	-1.31814	0.187455	0.414743
WBGene00220177	17949	Y51H7BM.2	2.04102	3.08498	2.46152	-1.25328	0.210102	NA
WBGene00169639	6940	21ur-15242	0.970702	3.08368	2.91275	-1.05868	0.289745	NA
WBGene00003763	17517	nlp-25	21.9246	3.08128	1.01329	-3.04088	0.00235889	0.0196796
WBGene00019605	369	ctsa-1	8251.42	3.08122	0.132767	-23.2077	3.80427e-119	3.3801e-115
WBGene00220200	26892	Y71H2B.12	0.868413	3.08037	3.86757	-0.796463	0.425763	NA
WBGene00016554	23742	math-19	0.515797	3.07887	4.96219	-0.620466	0.534951	NA
WBGene00014681	10704	C25D7.14	2.49613	3.0785	2.12125	-1.45127	0.146705	NA
WBGene00197237	16855	F54D5.19	0.578907	3.0784	5.59401	-0.550303	0.582112	NA
WBGene00195680	25126	T22B11.6	0.543588	3.07832	5.72219	-0.537962	0.590604	NA
WBGene00198885	13423	F40H3.12	0.189107	3.07818	5.99336	-0.513598	0.607533	NA
WBGene00219909	11469	F20D12.10	0.4275	3.07818	5.99336	-0.513598	0.607533	NA
WBGene00219916	26847	F26D10.23	0.666731	3.07781	5.96323	-0.516131	0.605763	NA
WBGene00010747	8670	K10D11.3	93.7581	3.07719	0.415004	-7.41484	1.21772e-13	6.2904e-12
WBGene00015449	17181	ugt-63	991.784	3.07579	0.248934	-12.3559	4.52876e-35	1.21934e-32
WBGene00021338	400	Y34F4.3	56.4974	3.07222	0.514016	-5.97689	2.27435e-09	7.25588e-08
WBGene00019058	5361	F58F9.4	179.253	3.06947	0.466085	-6.58564	4.5293e-11	1.81683e-09
WBGene00015439	9757	C04E12.10	30.1616	3.06866	0.928318	-3.30561	0.000947707	0.00925316
WBGene00044250	8905	F56G4.7	8.06993	3.06738	1.1492	-2.66914	0.00760453	0.0495172
WBGene00021500	3425	Y40C7B.4	16.6383	3.06625	0.979005	-3.132	0.00173618	0.0153722
WBGene00009522	14603	F38A1.9	71.222	3.06158	0.555347	-5.51291	3.5295e-08	9.44565e-07
WBGene00194940	42313	C34C6.9	1.098	3.05693	4.09434	-0.746623	0.455291	NA
WBGene00045024	7434	C43F9.11	4.17502	3.04718	1.85049	-1.64669	0.0996222	0.283382
WBGene00011327	20522	hlh-34	2.32161	3.04166	2.79842	-1.08692	0.277072	NA
WBGene00022871	17809	ZK1240.6	5.22818	3.04124	1.65774	-1.83457	0.0665688	0.222985
WBGene00019659	9344	K11H12.3	134.949	3.03898	0.381862	-7.95834	1.7437e-15	1.13086e-13
WBGene00008630	11617	nhr-175	1.45375	3.03781	3.10839	-0.977295	0.328423	NA
WBGene00022807	16154	srab-25	1.66155	3.03664	3.23207	-0.939533	0.347457	NA
WBGene00195067	12411	C04C3.9	1.09313	3.03542	3.38159	-0.897632	0.369382	NA
WBGene00044356	8422	W02D7.12	1.1598	3.03485	3.45985	-0.877162	0.380398	NA
WBGene00198445	18405	F43G6.14	1.41429	3.03414	3.56823	-0.850321	0.395146	NA
WBGene00005353	19983	srh-136	1.3821	3.03341	3.69453	-0.821055	0.411615	NA
WBGene00166751	24577	21ur-6076	1.04505	3.03319	3.73442	-0.812224	0.416663	NA
WBGene00009891	23369	scl-10	1.24859	3.03306	3.75932	-0.80681	0.419776	NA
WBGene00001733	19484	grl-24	1.10513	3.03287	3.79561	-0.799047	0.424263	NA
WBGene00077538	11897	T04F3.5	1.65054	3.03265	3.84125	-0.789497	0.429822	NA
WBGene00014710	23639	C50B6.13	1.28255	3.03179	4.03648	-0.751097	0.452594	NA
WBGene00000612	12984	col-35	1.29187	3.03164	4.07307	-0.744313	0.456687	NA
WBGene00001697	20973	grd-8	1.21991	3.03126	4.17191	-0.726589	0.467478	NA
WBGene00011183	8675	R09H10.6	3.89062	3.03103	1.96796	-1.54019	0.123515	0.32363
WBGene00009775	9148	F46B6.10	1.06448	3.031	4.24594	-0.713858	0.475315	NA
WBGene00195003	18893	Y46C8AL.11	0.942135	3.03087	4.28551	-0.707237	0.479419	NA
WBGene00005878	23196	srw-131	0.903933	3.03069	4.33982	-0.698344	0.484962	NA
WBGene00194729	9948	ZK783.7	0.878798	3.03049	4.40188	-0.688455	0.491166	NA
WBGene00219417	16444	F34H10.9	1.13172	3.03046	4.41607	-0.686235	0.492565	NA
WBGene00023282	17812	F39E9.9	0.731931	3.03006	4.55204	-0.66565	0.505635	NA
WBGene00006165	23253	str-114	1.53862	3.02992	4.6064	-0.657762	0.510691	NA
WBGene00011427	10177	T04C12.1	3.91143	3.02938	2.14962	-1.40926	0.158758	0.374205
WBGene00019553	20596	K09C4.9	0.894717	3.02918	4.9173	-0.616025	0.537878	NA
WBGene00019879	14769	R05D3.5	0.903088	3.02881	5.1029	-0.593548	0.552815	NA
WBGene00017822	23786	clec-216	0.746546	3.02861	5.21291	-0.580982	0.561253	NA
WBGene00009756	17588	F46B3.1	0.880828	3.02858	5.23022	-0.579054	0.562553	NA
WBGene00198145	20358	E03A3.11	0.608302	3.02805	5.56541	-0.544084	0.586384	NA
WBGene00044380	28328	T24E12.12	0.969762	3.02756	5.94216	-0.509504	0.610399	NA
WBGene00005561	23126	sri-49	0.570977	3.0275	5.99496	-0.505008	0.613553	NA
WBGene00006098	26958	str-32	0.634103	3.0275	5.99496	-0.505008	0.613553	NA
WBGene00021891	23937	Y54G2A.27	0.94112	3.0275	5.99496	-0.505008	0.613553	NA
WBGene00197362	25435	C23H4.11	0.242817	3.0275	5.99496	-0.505008	0.613553	NA
WBGene00219321	46454	T07H3.10	0.24712	3.0275	5.99496	-0.505008	0.613553	NA
WBGene00196952	43264	R07B1.19	0.34051	3.0275	5.99496	-0.505008	0.613553	NA
WBGene00197927	43826	C04D8.3	0.734224	3.0275	5.99496	-0.505008	0.613553	NA
WBGene00005046	20997	sra-20	0.182348	3.0275	5.99496	-0.505008	0.613553	NA
WBGene00005491	26686	srh-287	0.182348	3.0275	5.99496	-0.505008	0.613553	NA
WBGene00005784	26758	srw-37	0.182348	3.0275	5.99496	-0.505008	0.613553	NA
WBGene00005990	26819	srx-99	0.182348	3.0275	5.99496	-0.505008	0.613553	NA
WBGene00012617	23528	Y38H6C.4	0.182348	3.0275	5.99496	-0.505008	0.613553	NA
WBGene00013051	27251	Y50E8A.8	0.182348	3.0275	5.99496	-0.505008	0.613553	NA
WBGene00016959	27763	C55H1.1	0.182348	3.0275	5.99496	-0.505008	0.613553	NA
WBGene00023238	28186	C17H12.7	0.182348	3.0275	5.99496	-0.505008	0.613553	NA
WBGene00048376	24304	21ur-1991	0.182348	3.0275	5.99496	-0.505008	0.613553	NA
WBGene00050312	32819	21ur-3622	0.182348	3.0275	5.99496	-0.505008	0.613553	NA
WBGene00172284	16256	21ur-15698	0.182348	3.0275	5.99496	-0.505008	0.613553	NA
WBGene00172909	40419	21ur-11559	0.182348	3.0275	5.99496	-0.505008	0.613553	NA
WBGene00173506	40946	21ur-9879	0.182348	3.0275	5.99496	-0.505008	0.613553	NA
WBGene00174011	21857	21ur-6221	0.182348	3.0275	5.99496	-0.505008	0.613553	NA
WBGene00196088	42788	F58H1.11	0.182348	3.0275	5.99496	-0.505008	0.613553	NA
WBGene00197827	25515	R04F11.15	0.182348	3.0275	5.99496	-0.505008	0.613553	NA
WBGene00199344	44608	E02C12.16	0.182348	3.0275	5.99496	-0.505008	0.613553	NA
WBGene00200458	19910	F11A1.13	0.182348	3.0275	5.99496	-0.505008	0.613553	NA
WBGene00235376	16957	Y9C9A.112	0.182348	3.0275	5.99496	-0.505008	0.613553	NA
WBGene00268193	26927	ZK697.18	0.182348	3.0275	5.99496	-0.505008	0.613553	NA
WBGene00199354	14426	C31H1.97	0.321852	3.0275	5.99496	-0.505008	0.613553	NA
WBGene00198690	20813	F42H10.13	0.28139	3.0275	5.99496	-0.505008	0.613553	NA
WBGene00005052	20998	sra-26	0.28004	3.0275	5.99496	-0.505008	0.613553	NA
WBGene00005837	23184	srw-90	0.28966	3.0275	5.99496	-0.505008	0.613553	NA
WBGene00013512	20067	nhr-276	0.28966	3.0275	5.99496	-0.505008	0.613553	NA
WBGene00013395	27269	Y62H9A.7	0.311891	3.0275	5.99496	-0.505008	0.613553	NA
WBGene00196982	25370	Y41C4A.24	0.371557	3.0275	5.99496	-0.505008	0.613553	NA
WBGene00202162	46214	Y53H1C.11	0.371557	3.0275	5.99496	-0.505008	0.613553	NA
WBGene00005094	13542	srd-16	0.328887	3.0275	5.99496	-0.505008	0.613553	NA
WBGene00010820	16053	M01G12.6	0.333696	3.0275	5.99496	-0.505008	0.613553	NA
WBGene00012493	23519	Y20C6A.3	0.424225	3.0275	5.99496	-0.505008	0.613553	NA
WBGene00019038	23830	irld-37	0.387352	3.0275	5.99496	-0.505008	0.613553	NA
WBGene00045197	11889	C29F4.4	0.556856	3.0275	5.99496	-0.505008	0.613553	NA
WBGene00005409	26655	srh-198	0.639517	3.0275	5.99496	-0.505008	0.613553	NA
WBGene00005741	26745	srv-30	0.388701	3.0275	5.99496	-0.505008	0.613553	NA
WBGene00018888	27837	F55F1.2	0.469249	3.0275	5.99496	-0.505008	0.613553	NA
WBGene00219567	14449	linc-164	0.469249	3.0275	5.99496	-0.505008	0.613553	NA
WBGene00005736	23157	srv-25	0.90467	3.0275	5.99496	-0.505008	0.613553	NA
WBGene00008816	10120	F14F8.8	1.20737	3.0275	5.99496	-0.505008	0.613553	NA
WBGene00010949	18637	M195.4	0.578616	3.0275	5.99496	-0.505008	0.613553	NA
WBGene00015737	27718	srsx-12	0.628256	3.0275	5.99496	-0.505008	0.613553	NA
WBGene00016827	16115	sre-53	0.621448	3.0275	5.99496	-0.505008	0.613553	NA
WBGene00006250	27004	str-219	0.683229	3.0275	5.99496	-0.505008	0.613553	NA
WBGene00219318	17938	R08A2.9	0.626649	3.0275	5.99496	-0.505008	0.613553	NA
WBGene00050936	33339	ZK856.16	0.358566	3.0275	5.99496	-0.505008	0.613554	NA
WBGene00168892	24662	21ur-12599	0.32739	3.0275	5.99496	-0.505008	0.613554	NA
WBGene00044192	22840	F46B6.13	0.652399	3.0275	5.99496	-0.505007	0.613554	NA
WBGene00269385	17958	F41F3.9	0.749407	3.0275	5.99496	-0.505007	0.613554	NA
WBGene00189937	10420	Y6G8.15	0.601358	3.0275	5.99496	-0.505007	0.613554	NA
WBGene00077596	24446	K06B4.17	0.275699	3.0275	5.99496	-0.505007	0.613554	NA
WBGene00235302	26912	C07C7.3	0.275699	3.0275	5.99496	-0.505007	0.613554	NA
WBGene00268192	17454	ZK697.17	0.405242	3.0275	5.99496	-0.505007	0.613554	NA
WBGene00023302	20149	F58E2.6	0.490321	3.0275	5.99496	-0.505007	0.613554	NA
WBGene00022940	18844	C23H5.10	0.639498	3.0275	5.99496	-0.505007	0.613554	NA
WBGene00007842	23298	C31E10.1	0.646569	3.0275	5.99496	-0.505007	0.613554	NA
WBGene00005918	23207	srx-27	0.353492	3.0275	5.99496	-0.505007	0.613554	NA
WBGene00005584	9581	sri-72	0.47443	3.0275	5.99496	-0.505007	0.613554	NA
WBGene00017906	11257	F28F9.2	0.480277	3.0275	5.99496	-0.505007	0.613554	NA
WBGene00015835	27724	math-6	0.508553	3.0275	5.99496	-0.505007	0.613554	NA
WBGene00043328	28292	F45D11.11	0.508553	3.0275	5.99496	-0.505007	0.613554	NA
WBGene00050875	8921	bah-1	10.0161	3.02556	1.03935	-2.91101	0.00360259	0.027594
WBGene00022395	18287	ceh-76	4.86446	3.02142	1.51648	-1.9924	0.0463276	0.177041
WBGene00009625	11636	F41E7.9	3.83701	3.01376	2.06863	-1.45688	0.145148	0.355127
WBGene00009048	1154	cth-1	2746.4	3.01037	0.183449	-16.4099	1.62518e-60	1.20331e-57
WBGene00006075	1101	str-7	52.1311	3.00827	0.526248	-5.71645	1.08771e-08	3.15312e-07
WBGene00018506	3830	F46F5.15	4.94285	3.00825	1.708	-1.76127	0.0781924	0.246187
WBGene00005640	6110	srn-1	7.15994	3.00299	1.73994	-1.72592	0.0843625	0.257129
WBGene00007841	17057	C31C9.7	237.323	3.00235	0.289996	-10.3531	4.05318e-25	6.37389e-23
WBGene00009240	10127	F28H7.7	16.0308	2.99884	0.846795	-3.5414	0.000398013	0.00449916
WBGene00006212	8075	str-168	27.5773	2.99783	1.15983	-2.58472	0.00974587	0.0595714
WBGene00017093	4325	E02C12.8	438.146	2.99637	0.209021	-14.3353	1.31722e-46	5.57311e-44
WBGene00044349	444	Y71G12B.32	43.6501	2.98451	0.623299	-4.78825	1.6824e-06	3.41281e-05
WBGene00011096	12140	R07B7.12	3.26783	2.98301	1.93925	-1.53823	0.123992	0.324254
WBGene00013634	7230	Y105C5A.9	4.21617	2.98114	1.97199	-1.51174	0.1306	0.334159
WBGene00016555	11749	math-20	404.178	2.97764	0.295937	-10.0618	8.15349e-24	1.19742e-21
WBGene00009229	21569	F28G4.4	6.00538	2.97347	1.50498	-1.97575	0.048183	0.182095
WBGene00012467	12171	arrd-8	147.919	2.96853	0.468461	-6.33678	2.34621e-10	8.42265e-09
WBGene00235133	491	T26H5.14	83.6821	2.968	0.379882	-7.81295	5.58626e-15	3.36973e-13
WBGene00202006	14946	C13C4.12	1.25635	2.95934	3.076	-0.962075	0.336012	NA
WBGene00018414	1853	nstp-8	6.93274	2.9538	1.76218	-1.67621	0.0936963	0.273351
WBGene00019135	23839	math-32	8.13549	2.95208	1.0138	-2.91189	0.00359245	0.0275474
WBGene00020449	5882	fbxa-54	260.722	2.94666	0.376043	-7.83596	4.65277e-15	2.85103e-13
WBGene00000593	9496	col-2	7.15801	2.94456	1.43501	-2.05195	0.0401749	0.161921
WBGene00019495	6838	sdz-24	339.936	2.94441	0.351117	-8.38583	5.03683e-17	3.90849e-15
WBGene00021582	3904	clec-71	20.7028	2.93837	0.849204	-3.46015	0.000539884	0.00579483
WBGene00010126	14116	F55G11.6	3.3728	2.93644	1.92075	-1.5288	0.126315	0.327708
WBGene00010928	224	clec-258	126.222	2.93469	0.378004	-7.76365	8.25183e-15	4.88784e-13
WBGene00008827	23336	F14H3.8	3.5306	2.92313	2.09475	-1.39546	0.162878	0.379984
WBGene00196879	14913	C30F8.6	1.25951	2.91911	3.54463	-0.823531	0.410206	NA
WBGene00008850	5636	F15B9.6	246.086	2.91674	0.390081	-7.47728	7.58792e-14	4.02499e-12
WBGene00198737	18408	T04C9.8	1.30935	2.91661	3.20186	-0.91091	0.362343	NA
WBGene00020048	17761	lgc-12	17.3321	2.91619	0.965377	-3.02078	0.00252127	0.0207999
WBGene00013900	282	ugt-18	340.13	2.91468	0.323353	-9.01394	1.98777e-19	1.89907e-17
WBGene00043049	9409	F32H2.11	8.91196	2.90672	1.45184	-2.00209	0.0452748	0.174519
WBGene00007818	127	C30F2.4	40.5704	2.90439	0.801637	-3.62308	0.000291119	0.00342142
WBGene00235268	10471	Y54G2A.76	16.3857	2.90255	1.04248	-2.78427	0.00536481	0.0379057
WBGene00015119	18699	B0302.2	5.68026	2.89998	1.31059	-2.21274	0.0269159	0.12275
WBGene00235332	492	K04A8.20	61.7571	2.89633	0.588798	-4.91905	8.69642e-07	1.86412e-05
WBGene00197452	20346	C25F6.13	0.97467	2.89571	4.62626	-0.625929	0.531362	NA
WBGene00019641	18771	K10G6.4	9.84542	2.88867	1.35479	-2.1322	0.0329905	0.141365
WBGene00011223	8677	R10H10.4	12.4823	2.88158	1.10306	-2.61235	0.00899216	0.0561187
WBGene00220000	15459	K02F2.11	7.0255	2.87826	1.31563	-2.18775	0.028688	0.128799
WBGene00001397	7012	fat-5	129.663	2.87663	0.496338	-5.79572	6.80297e-09	2.03174e-07
WBGene00013294	17643	pals-30	31.1186	2.87637	0.927841	-3.10006	0.00193479	0.0167795
WBGene00012529	2759	Y32F6A.4	3014.45	2.86557	0.17376	-16.4916	4.21775e-61	3.56902e-58
WBGene00005929	13052	srx-38	3.20636	2.86374	1.64928	-1.73636	0.0825008	0.25364
WBGene00011594	3232	T07G12.3	9.46437	2.86052	1.33449	-2.14353	0.0320703	0.138558
WBGene00195051	19867	T22D1.18	3.47357	2.85824	2.08273	-1.37236	0.169953	0.389685
WBGene00050971	12890	F11D11.15	1.75231	2.85535	2.39215	-1.19363	0.232623	NA
WBGene00020772	18798	T24E12.2	8.46192	2.84897	1.44491	-1.97173	0.0486408	0.183272
WBGene00077576	17861	C15H11.13	4.48151	2.8472	1.52022	-1.87289	0.061084	0.212371
WBGene00000272	8985	bro-1	11.6297	2.84111	0.917527	-3.09649	0.00195826	0.0169335
WBGene00007466	17555	chil-2	5.57425	2.83148	1.43063	-1.97918	0.0477957	0.180994
WBGene00010797	14627	srbc-75	1.48055	2.82913	3.2668	-0.866023	0.386477	NA
WBGene00020329	385	bath-26	53.5173	2.82578	0.697327	-4.05231	5.07149e-05	0.000735677
WBGene00194710	9947	mks-2	2.80539	2.81633	2.14639	-1.31212	0.189479	NA
WBGene00015496	22193	C05E11.7	7.50532	2.81072	1.52192	-1.84683	0.0647717	0.219353
WBGene00046220	24185	21ur-3131	0.157038	2.80495	6.00271	-0.467281	0.640299	NA
WBGene00046223	29143	21ur-5217	0.157038	2.80495	6.00271	-0.467281	0.640299	NA
WBGene00165461	33867	21ur-13676	0.157038	2.80495	6.00271	-0.467281	0.640299	NA
WBGene00165806	34170	21ur-10287	0.157038	2.80495	6.00271	-0.467281	0.640299	NA
WBGene00167463	35632	21ur-11432	0.157038	2.80495	6.00271	-0.467281	0.640299	NA
WBGene00170654	20708	21ur-14997	0.157038	2.80495	6.00271	-0.467281	0.640299	NA
WBGene00021403	23917	Y38C1AB.1	0.295108	2.80495	6.00271	-0.467281	0.640299	NA
WBGene00198275	44018	K09A9.10	0.355121	2.80495	6.00271	-0.467281	0.640299	NA
WBGene00173766	16263	21ur-10725	0.385288	2.80495	6.00271	-0.467281	0.640299	NA
WBGene00201242	17418	F29G9.16	0.551957	2.80495	6.00271	-0.467281	0.640299	NA
WBGene00014716	23641	C54E10.t2	0.226073	2.80495	6.00271	-0.467281	0.640299	NA
WBGene00050414	32913	21ur-1815	0.210694	2.80495	6.00271	-0.467281	0.640299	NA
WBGene00198568	20370	F53B1.12	0.210694	2.80495	6.00271	-0.467281	0.640299	NA
WBGene00202374	2985	T01C8.11	0.449828	2.80495	6.00271	-0.467281	0.640299	NA
WBGene00047575	24257	21ur-1618	0.455562	2.80495	6.00271	-0.467281	0.640299	NA
WBGene00018059	23798	F35F10.10	0.539709	2.80495	6.00271	-0.467281	0.640299	NA
WBGene00219676	12950	linc-48	0.675481	2.80495	6.00271	-0.46728	0.640299	NA
WBGene00168683	16238	21ur-13934	0.392954	2.80495	6.00271	-0.46728	0.640299	NA
WBGene00219793	46507	C01F6.15	0.562497	2.80495	6.00271	-0.46728	0.640299	NA
WBGene00171016	24767	21ur-12118	0.583627	2.80495	6.00271	-0.46728	0.640299	NA
WBGene00198620	8463	F11C7.9	1.0699	2.80318	4.98993	-0.561767	0.574275	NA
WBGene00017872	4339	F28A10.4	4.49076	2.80246	1.77364	-1.58006	0.114093	0.308138
WBGene00023478	16753	srz-62	1.05515	2.80128	4.34998	-0.643975	0.519592	NA
WBGene00198422	21896	R11H6.8	1.26408	2.79938	3.03588	-0.922098	0.356477	NA
WBGene00014319	23597	F09B9.t2	1.71158	2.79906	3.86398	-0.724399	0.468821	NA
WBGene00197507	43575	R08E3.7	1.10435	2.79904	3.86079	-0.724991	0.468457	NA
WBGene00007822	11600	clec-202	1.42031	2.79691	3.53421	-0.79138	0.428722	NA
WBGene00013615	15662	fbxa-110	3.17303	2.79395	2.24291	-1.24568	0.21288	NA
WBGene00044278	17832	F09C6.14	3.05816	2.78874	1.93308	-1.44264	0.149121	NA
WBGene00009242	11125	sre-6	6.49648	2.78699	1.66766	-1.6712	0.0946817	0.274783
WBGene00017205	23766	F07C4.12	13.5505	2.78381	0.833646	-3.33932	0.000839826	0.0083747
WBGene00004177	17013	pqn-98	5.05223	2.77706	2.02406	-1.37202	0.170057	0.38979
WBGene00077764	15370	F59C6.16	481.657	2.77406	0.444597	-6.23948	4.39022e-10	1.5327e-08
WBGene00009001	13099	tyr-3	3.66001	2.77127	2.1307	-1.30064	0.193382	0.422858
WBGene00198122	43942	F58F12.9	3.06886	2.77106	2.23178	-1.24164	0.214371	NA
WBGene00010509	15121	K02E2.8	9.80597	2.76633	1.64723	-1.67938	0.0930772	0.27226
WBGene00008068	6147	sdz-6	35.1549	2.76556	0.809869	-3.41483	0.000638229	0.00665478
WBGene00013753	9735	Y113G7A.16	17.7357	2.76	0.965559	-2.85844	0.00425727	0.031561
WBGene00044090	24046	srbc-33	2.50536	2.75972	2.30866	-1.19537	0.231941	NA
WBGene00164969	18879	K09C8.9	3.13188	2.7555	2.31506	-1.19025	0.233947	NA
WBGene00018619	6357	F48G7.8	2.68022	2.7531	2.11401	-1.30231	0.192811	NA
WBGene00007036	10093	sod-5	8.21601	2.75077	1.50538	-1.8273	0.0676553	0.22518
WBGene00009399	13109	ddn-2	16.4214	2.74812	0.756948	-3.63052	0.000282846	0.003333
WBGene00022179	924	Y71H2AM.14	33.7035	2.74783	0.531575	-5.16923	2.35064e-07	5.46024e-06
WBGene00003689	2558	nhr-99	183.094	2.74723	0.278483	-9.865	5.90324e-23	7.8284e-21
WBGene00019579	874	oac-57	138.034	2.74551	0.363349	-7.55613	4.15241e-14	2.23601e-12
WBGene00011078	11663	R07B1.6	2.87777	2.74432	1.67832	-1.63516	0.102015	NA
WBGene00185101	42278	Y65A5A.24	0.150279	2.7437	6.00506	-0.456898	0.647745	NA
WBGene00201649	45927	H30A04.12	0.150279	2.7437	6.00506	-0.456898	0.647745	NA
WBGene00168661	36715	21ur-8691	0.313418	2.7437	6.00506	-0.456898	0.647745	NA
WBGene00166151	24538	21ur-14878	0.355868	2.7437	6.00506	-0.456897	0.647745	NA
WBGene00200948	45530	Y42H9B.9	0.600431	2.74369	6.00506	-0.456897	0.647745	NA
WBGene00003335	22983	mir-241	0.535165	2.74369	6.00506	-0.456897	0.647745	NA
WBGene00196052	20309	T27E4.14	1.07862	2.74108	3.76132	-0.728754	0.466152	NA
WBGene00044895	12880	R06A10.5	5.01729	2.74055	1.31572	-2.08293	0.0372572	0.153896
WBGene00021707	22810	srbc-38	1.58854	2.73881	3.11186	-0.880123	0.378793	NA
WBGene00005374	26648	srh-158	1.08783	2.73881	3.11183	-0.880128	0.37879	NA
WBGene00167348	13886	21ur-5967	1.08352	2.73857	3.06368	-0.893884	0.371384	NA
WBGene00005530	19016	sri-18	2.2663	2.73421	2.50108	-1.09321	0.274302	NA
WBGene00019791	27868	sdz-25	1.74514	2.73334	2.42999	-1.12483	0.260659	NA
WBGene00001399	21974	fat-7	195.401	2.73252	0.318338	-8.58372	9.18569e-18	7.69951e-16
WBGene00005617	13550	srj-32	3.35199	2.73224	2.35107	-1.16213	0.245184	0.483323
WBGene00017698	23422	F22B7.9	651.12	2.73198	0.240217	-11.373	5.70219e-30	1.16469e-27
WBGene00044274	8906	nspa-7	8.07409	2.72911	1.25886	-2.16793	0.0301643	0.133172
WBGene00044273	12367	nspa-6	8.24524	2.7291	1.25937	-2.16704	0.0302318	0.133357
WBGene00195149	13902	F26H11.8	7.46891	2.72573	1.14541	-2.37969	0.0173272	0.0901359
WBGene00011922	12645	T22C8.1	5.54033	2.72308	1.62748	-1.67319	0.094289	0.27418
WBGene00013091	760	Y51B9A.9	114.335	2.72211	0.324982	-8.37619	5.46679e-17	4.22369e-15
WBGene00043066	6919	acr-25	35.5385	2.71343	0.641812	-4.22776	2.36026e-05	0.000375487
WBGene00016544	19207	math-18	144.304	2.7093	0.398078	-6.80595	1.00385e-11	4.25739e-10
WBGene00044259	24064	Y73F8A.36	3.90071	2.70158	1.6105	-1.67748	0.0934488	0.272808
WBGene00011168	6208	R09D1.12	21.7566	2.69924	0.900824	-2.99641	0.00273177	0.0222167
WBGene00198108	19898	ZK1128.10	0.585921	2.69778	5.43758	-0.496135	0.619799	NA
WBGene00006272	8076	str-245	78.4427	2.69199	0.394219	-6.82868	8.57004e-12	3.66081e-10
WBGene00194737	6463	Y50D7A.13	1.98188	2.6918	2.36196	-1.13965	0.254433	NA
WBGene00012772	22135	srt-49	2.45425	2.68985	2.19606	-1.22485	0.220631	NA
WBGene00219769	10967	linc-64	1.11707	2.68472	2.80756	-0.956246	0.338948	NA
WBGene00015080	15679	B0244.5	47.2936	2.68342	0.442053	-6.07035	1.2763e-09	4.20775e-08
WBGene00167685	21842	21ur-9174	1.07303	2.6829	3.29386	-0.814515	0.41535	NA
WBGene00077706	16790	mir-1829.2	1.30569	2.68253	3.43477	-0.780991	0.434808	NA
WBGene00023308	13851	H11E01.t1	0.982057	2.68233	3.51939	-0.762159	0.445965	NA
WBGene00201168	18928	B0457.16	0.681946	2.68136	4.08449	-0.656474	0.511519	NA
WBGene00202499	4479	B0507.15	7.79416	2.68108	1.64783	-1.62704	0.103729	0.290607
WBGene00019262	12793	dmsr-12	0.641942	2.68024	5.37812	-0.498359	0.618231	NA
WBGene00200146	45077	Y75B8A.55	0.273063	2.67994	6.00761	-0.446091	0.655531	NA
WBGene00195023	22396	F39E9.16	0.332729	2.67994	6.00761	-0.446091	0.655531	NA
WBGene00165069	24479	21ur-8833	0.241887	2.67994	6.00761	-0.446091	0.655531	NA
WBGene00194865	14896	F53A2.10	0.37624	2.67994	6.00761	-0.446091	0.655531	NA
WBGene00005341	26642	srh-123	0.484431	2.67994	6.00761	-0.446091	0.655531	NA
WBGene00005380	93	srh-164	0.443522	2.67994	6.00761	-0.446091	0.655531	NA
WBGene00045150	24118	ZK265.10	0.409331	2.67994	6.00761	-0.446091	0.655531	NA
WBGene00006103	20003	str-38	0.827246	2.67994	6.00761	-0.446091	0.655531	NA
WBGene00196779	43177	C15C7.10	0.14352	2.67994	6.00761	-0.446091	0.655531	NA
WBGene00201141	26148	Y76B12C.10	0.14352	2.67994	6.00761	-0.446091	0.655531	NA
WBGene00206510	26396	Y113G7A.22	0.14352	2.67994	6.00761	-0.446091	0.655531	NA
WBGene00019551	9845	K09C4.6	7.21494	2.67862	1.51172	-1.7719	0.076411	0.242768
WBGene00022487	9899	fbxa-21	133.986	2.67617	0.379531	-7.05124	1.77333e-12	8.32348e-11
WBGene00010750	221	K10D11.6	243.759	2.67448	0.331136	-8.07668	6.6553e-16	4.46282e-14
WBGene00215616	17433	W04G3.17	1.71995	2.66897	2.5804	-1.03433	0.300984	NA
WBGene00004994	10061	spp-9	1.73337	2.66346	3.12378	-0.852641	0.393858	NA
WBGene00017494	23775	irld-31	1.25097	2.66018	3.52717	-0.754196	0.450732	NA
WBGene00014067	14680	ZK675.4	4.52267	2.65943	1.64697	-1.61475	0.106366	0.294613
WBGene00007246	12059	nspb-10	9.33681	2.65899	1.60243	-1.65935	0.0970459	0.279109
WBGene00018168	15252	irld-7	9.28059	2.65451	1.03703	-2.55973	0.0104755	0.0628244
WBGene00268209	10473	T04B8.6	3.47519	2.63986	2.03703	-1.29594	0.194997	0.424466
WBGene00009791	9149	F46F3.3	11.6738	2.63912	1.36859	-1.92834	0.0538127	0.195913
WBGene00005941	23209	srx-50	2.58727	2.63834	1.80574	-1.46109	0.143991	NA
WBGene00015828	14215	math-14	393.235	2.6362	0.370886	-7.10785	1.17866e-12	5.58526e-11
WBGene00019057	12789	F58F9.3	684.352	2.63237	0.207058	-12.7132	4.99584e-37	1.53062e-34
WBGene00019788	15775	M116.1	2.22567	2.6317	2.79521	-0.941504	0.346447	NA
WBGene00021086	27895	W08E12.5	1.2567	2.62892	2.958	-0.888749	0.374138	NA
WBGene00013277	17642	sre-41	1.1757	2.62733	3.06859	-0.8562	0.391887	NA
WBGene00012518	3716	comt-2	56.7459	2.62559	0.674274	-3.89395	9.86258e-05	0.0013237
WBGene00014043	12197	clec-58	2.25631	2.62352	2.60384	-1.00756	0.313666	NA
WBGene00008494	153	F01D5.3	131.132	2.62326	0.506987	-5.17421	2.28874e-07	5.32342e-06
WBGene00169973	14381	21ur-9960	0.906732	2.62072	3.76204	-0.696622	0.486039	NA
WBGene00017819	18207	F26D11.2	10.8131	2.62033	1.13246	-2.31384	0.0206763	0.10243
WBGene00005079	20477	srd-1	3.29426	2.61932	1.9968	-1.31176	0.189601	0.418069
WBGene00003958	17011	pcp-3	3459.61	2.61916	0.268633	-9.74996	1.84541e-22	2.3592e-20
WBGene00198663	20811	F36D4.11	0.904185	2.6184	4.17637	-0.626957	0.530688	NA
WBGene00199478	17396	C01F6.13	0.674971	2.61661	4.62584	-0.565651	0.571631	NA
WBGene00169648	18359	21ur-13748	1.11501	2.61546	3.19346	-0.819006	0.412783	NA
WBGene00044129	20157	C01B9.3	0.883627	2.61508	5.16449	-0.506359	0.612605	NA
WBGene00014349	23601	F27D4.t1	0.136761	2.6135	6.0104	-0.434829	0.663686	NA
WBGene00047395	30206	21ur-3348	0.136761	2.6135	6.0104	-0.434829	0.663686	NA
WBGene00050657	24417	21ur-735	0.136761	2.6135	6.0104	-0.434829	0.663686	NA
WBGene00167142	35337	21ur-9639	0.136761	2.6135	6.0104	-0.434829	0.663686	NA
WBGene00195840	25154	F35B12.12	0.136761	2.6135	6.0104	-0.434829	0.663686	NA
WBGene00196260	42884	F32B5.10	0.136761	2.6135	6.0104	-0.434829	0.663686	NA
WBGene00200441	26014	DY3.10	0.136761	2.6135	6.0104	-0.434829	0.663686	NA
WBGene00019083	20589	F59A3.10	0.235803	2.6135	6.0104	-0.434829	0.663686	NA
WBGene00195666	25121	C34E11.9	0.244072	2.6135	6.0104	-0.434829	0.663686	NA
WBGene00201530	45855	F29F11.17	0.186282	2.6135	6.0104	-0.434829	0.663686	NA
WBGene00169486	37437	21ur-13200	0.185607	2.6135	6.0104	-0.434829	0.663686	NA
WBGene00197663	18398	F13H6.13	0.190417	2.6135	6.0104	-0.434829	0.663686	NA
WBGene00201759	19429	M176.14	0.190417	2.6135	6.0104	-0.434829	0.663686	NA
WBGene00194871	42305	R107.9	0.201533	2.6135	6.0104	-0.434829	0.663686	NA
WBGene00049160	31778	21ur-995	0.231365	2.6135	6.0104	-0.434829	0.663686	NA
WBGene00014526	27499	T22A3.t2	0.304205	2.6135	6.0104	-0.434829	0.663686	NA
WBGene00172133	19371	21ur-14570	0.344443	2.6135	6.0104	-0.434829	0.663686	NA
WBGene00196707	20327	B0393.12	0.278041	2.61349	6.0104	-0.434829	0.663686	NA
WBGene00166520	13883	21ur-14531	0.292085	2.61349	6.0104	-0.434829	0.663687	NA
WBGene00197712	14414	F48A9.4	0.553969	2.61349	6.0104	-0.434829	0.663687	NA
WBGene00013884	281	ZC412.3	0.619815	2.61349	6.01039	-0.434829	0.663687	NA
WBGene00019532	7855	K08D10.9	75.6362	2.60646	0.330282	-7.89162	2.98297e-15	1.86646e-13
WBGene00044783	452	T26H5.10	23.0796	2.60459	0.821803	-3.16936	0.00152776	0.0138653
WBGene00219234	17434	B0511.17	1.05605	2.5988	4.92257	-0.527935	0.597545	NA
WBGene00010112	20040	nhr-191	0.964949	2.59735	4.23063	-0.61394	0.539255	NA
WBGene00013901	774	ugt-16	890.211	2.59535	0.209754	-12.3733	3.64405e-35	9.96227e-33
WBGene00021297	12827	fbxc-55	2.48603	2.59117	2.5043	-1.03469	0.300815	NA
WBGene00018114	23800	srt-41	4.41742	2.59071	1.56442	-1.65602	0.0977184	0.280255
WBGene00010278	16588	F58G6.8	4.14482	2.58849	1.91853	-1.3492	0.177271	0.400523
WBGene00018049	19232	clec-138	3.29956	2.58596	2.14146	-1.20757	0.227212	0.462122
WBGene00011533	19631	T06E4.5	6.20754	2.58257	1.33747	-1.93094	0.0534911	0.195335
WBGene00000024	4991	abu-1	45.4825	2.58088	0.592201	-4.35811	1.31188e-05	0.000221808
WBGene00235129	22946	ZC518.8	2.72762	2.57657	2.63297	-0.978581	0.327787	NA
WBGene00049388	24355	21ur-801	0.712989	2.57182	4.50073	-0.571423	0.567713	NA
WBGene00002200	4537	kin-16	430.965	2.57046	0.3081	-8.34295	7.24605e-17	5.47924e-15
WBGene00169188	13888	21ur-8126	3.34673	2.57034	1.71978	-1.49457	0.135026	0.340873
WBGene00010095	13640	F55C5.6	7.92778	2.56956	1.53388	-1.6752	0.0938948	0.2736
WBGene00020592	5392	ugt-12	4732.66	2.56947	0.222384	-11.5542	7.02976e-31	1.54221e-28
WBGene00004811	1096	skr-5	65.3227	2.56682	0.347422	-7.3882	1.48824e-13	7.62135e-12
WBGene00001391	4522	far-7	266	2.56156	0.332511	-7.70367	1.32208e-14	7.48198e-13
WBGene00044198	22349	F56H9.6	2.45314	2.55528	2.02292	-1.26316	0.206532	NA
WBGene00005745	23160	srv-34	4.62082	2.55463	1.7606	-1.451	0.146779	0.356709
WBGene00005949	7072	srx-58	18.2045	2.54653	0.910988	-2.79535	0.00518429	0.0370082
WBGene00200927	21922	Y116A8C.466	0.696058	2.54518	4.46844	-0.569591	0.568955	NA
WBGene00013950	6740	ZK262.3	80.2222	2.54309	0.58001	-4.38457	1.16213e-05	0.000197808
WBGene00010740	220	K10D3.6	630.436	2.53886	0.202797	-12.5192	5.86202e-36	1.65346e-33
WBGene00012255	5704	lpr-6	66.2366	2.53564	0.480493	-5.27718	1.3119e-07	3.18043e-06
WBGene00018264	7830	cyp-33C6	14.5347	2.53041	1.13344	-2.23251	0.0255816	0.11868
WBGene00003093	15007	lys-4	3305.77	2.52997	0.258476	-9.78802	1.26759e-22	1.63225e-20
WBGene00005090	19008	srd-12	4.74523	2.52653	1.85129	-1.36474	0.172333	0.393345
WBGene00269378	5488	C07G3.15	3.24513	2.52336	1.71641	-1.47014	0.141525	0.349777
WBGene00138711	10905	R07B1.13	28.0561	2.51926	0.787693	-3.19828	0.0013825	0.0127474
WBGene00022549	8892	ZC196.5	272.926	2.51805	0.272616	-9.23662	2.54407e-20	2.59817e-18
WBGene00020880	23899	T28A11.18	10.6847	2.51596	0.837953	-3.00251	0.00267765	0.0218666
WBGene00017390	6803	F12A10.1	325.299	2.50859	0.384144	-6.53033	6.56258e-11	2.57433e-09
WBGene00020357	3872	T08E11.1	11.6513	2.50441	1.18518	-2.1131	0.0345921	0.146358
WBGene00019861	19277	R04A9.1	2.75824	2.50353	1.98947	-1.25839	0.208249	NA
WBGene00009518	1669	clec-166	560.568	2.49991	0.229031	-10.9151	9.75762e-28	1.80618e-25
WBGene00018493	15257	F46F5.1	1.66154	2.49861	2.7942	-0.89421	0.371209	NA
WBGene00044182	11872	F09C6.12	7.05922	2.49825	1.60509	-1.55646	0.119598	0.31763
WBGene00269337	11474	F28A10.12	8.08446	2.49593	1.44938	-1.72207	0.0850562	0.258299
WBGene00015984	2817	C18G1.6	29.2044	2.49361	0.593165	-4.20391	2.62338e-05	0.000412635
WBGene00019580	21199	oac-58	50.2033	2.49234	0.617708	-4.03482	5.46438e-05	0.000783713
WBGene00197915	19895	C17H12.30	2.31368	2.49104	2.33841	-1.06527	0.286754	NA
WBGene00010256	210	hrg-3	1969.9	2.49085	0.289971	-8.59001	8.69636e-18	7.35878e-16
WBGene00017764	2847	F25A2.1	74.2989	2.4883	0.449273	-5.53851	3.05057e-08	8.21342e-07
WBGene00015399	1283	cyp-35A1	27.0963	2.48686	0.712375	-3.49095	0.000481313	0.00528027
WBGene00011537	17131	T06E4.10	10.6361	2.48601	1.10035	-2.25929	0.0238655	0.113545
WBGene00008807	9633	F14F3.4	6.18283	2.48452	1.15835	-2.14489	0.0319617	0.138223
WBGene00169734	11408	21ur-13267	5.5285	2.48324	1.43731	-1.7277	0.0840412	0.256688
WBGene00012872	18664	Y45F10B.8	2.03246	2.48069	2.33955	-1.06033	0.288994	NA
WBGene00020220	384	clec-140	4.94925	2.48006	1.6298	-1.52169	0.128086	0.330288
WBGene00014805	15675	K08H10.5	2.64014	2.47962	1.95024	-1.27144	0.203571	NA
WBGene00020080	5870	math-37	98.5212	2.47618	0.405615	-6.10475	1.02962e-09	3.43271e-08
WBGene00016379	809	C33H5.13	747.136	2.47321	0.386753	-6.3948	1.60758e-10	5.84187e-09
WBGene00022665	4430	ZK154.1	91.5518	2.47152	0.470952	-5.24792	1.53828e-07	3.6741e-06
WBGene00013637	1763	Y105C5A.13	11.3055	2.46862	1.02629	-2.40539	0.0161553	0.0856953
WBGene00011077	7689	R07B1.5	6.17441	2.46421	1.40055	-1.75946	0.0784996	0.246761
WBGene00000666	13982	col-91	160.258	2.45841	0.557289	-4.41137	1.02719e-05	0.000176359
WBGene00018708	19738	oac-32	908.012	2.45791	0.31298	-7.85324	4.05413e-15	2.50146e-13
WBGene00044257	12365	Y45F10D.16	3.24554	2.45666	2.20878	-1.11222	0.266043	0.5053
WBGene00011416	17613	T04A11.1	24.4432	2.4521	0.58208	-4.21265	2.52389e-05	0.000398308
WBGene00011419	19126	T04A11.4	24.5129	2.4521	0.583296	-4.20386	2.62396e-05	0.000412635
WBGene00012249	22637	W04E12.4	16.5935	2.44854	1.12987	-2.1671	0.0302272	0.133357
WBGene00015759	301	C14C6.5	1634.15	2.44692	0.169595	-14.4281	3.44631e-47	1.57028e-44
WBGene00012839	7210	Y43F8C.18	14.7124	2.44657	0.941992	-2.59723	0.00939781	0.0580139
WBGene00013607	13190	clec-27	17.3941	2.43859	0.872964	-2.79346	0.0052147	0.0371255
WBGene00011536	14146	T06E4.9	33.6439	2.43847	0.968888	-2.51677	0.0118435	0.0684642
WBGene00008886	5637	F16C3.2	399.996	2.43211	0.255989	-9.50081	2.08268e-21	2.38769e-19
WBGene00019273	867	H43E16.1	409.842	2.43085	0.372579	-6.52439	6.82784e-11	2.66076e-09
WBGene00014979	23674	ZC47.11	5.20967	2.42994	1.52726	-1.59104	0.1116	0.303649
WBGene00015596	10251	fbxa-161	15.6336	2.4276	0.979139	-2.47932	0.0131632	0.0738233
WBGene00220261	6981	ZC434.10	8.43297	2.42672	1.35346	-1.79297	0.0729775	0.236817
WBGene00010372	18626	H08J19.1	3.5334	2.42514	2.16672	-1.11927	0.263026	0.502146
WBGene00007599	8111	C15A11.7	464.98	2.42414	0.254167	-9.53759	1.46184e-21	1.74342e-19
WBGene00002026	13005	hsp-70	1699.43	2.42226	0.24112	-10.0458	9.58333e-24	1.38452e-21
WBGene00017214	7301	F07E5.9	24.0483	2.42201	0.93476	-2.59105	0.00956832	0.0586724
WBGene00012070	3708	T26H5.8	29.5669	2.42201	0.622769	-3.88909	0.00010062	0.00134741
WBGene00010762	15129	K10H10.6	1.66927	2.41761	2.37163	-1.01939	0.308019	NA
WBGene00044488	448	Y54G2A.45	2298.48	2.41359	0.207843	-11.6126	3.55828e-31	8.00388e-29
WBGene00008662	3647	F10G8.2	11.8379	2.41301	0.910417	-2.65045	0.00803851	0.0517177
WBGene00015045	1776	cyp-34A10	60.8268	2.4003	0.376887	-6.36875	1.90577e-10	6.88324e-09
WBGene00197898	43810	W09D6.9	0.978909	2.39777	3.6437	-0.65806	0.510499	NA
WBGene00002211	6052	kin-30	86.0511	2.39308	0.437807	-5.46607	4.60129e-08	1.21133e-06
WBGene00015615	5766	fbxc-48	5.37714	2.392	1.61002	-1.48569	0.13736	0.344418
WBGene00197665	12923	C48G7.4	0.715976	2.39143	4.4774	-0.534113	0.593264	NA
WBGene00007250	11588	nspb-8	7.35898	2.39094	1.27225	-1.8793	0.0602036	0.210139
WBGene00020526	12317	T15B7.14	41.3216	2.38729	0.642027	-3.71836	0.000200518	0.00247444
WBGene00009395	6651	clec-64	11.9046	2.38685	1.13017	-2.11194	0.0346916	0.146639
WBGene00005531	18024	sri-19	3.62141	2.37963	2.00958	-1.18414	0.236358	0.472766
WBGene00018039	10780	F35D2.1	4.04473	2.37873	1.71064	-1.39055	0.164361	0.381959
WBGene00000660	1508	col-85	8.83729	2.37765	1.31991	-1.80137	0.0716448	0.234203
WBGene00008497	1142	F01D5.7	3.07346	2.37728	2.2436	-1.05958	0.289335	NA
WBGene00010752	222	K10G4.3	203.478	2.3771	0.216128	-10.9986	3.88221e-28	7.33902e-26
WBGene00001754	28	gst-6	1294.43	2.37016	0.159834	-14.8289	9.52898e-50	4.838e-47
WBGene00007163	12568	fbxa-154	3.46595	2.36985	1.77667	-1.33387	0.182245	0.408189
WBGene00194932	10426	F54F7.11	2.16847	2.35919	2.70951	-0.870706	0.383915	NA
WBGene00044112	11871	srm-5	2.39232	2.35891	2.44621	-0.964313	0.334889	NA
WBGene00010946	16596	M176.10	9.44073	2.35699	1.50654	-1.5645	0.1177	0.314228
WBGene00012959	9224	Y47H10A.3	22.0737	2.35322	0.759889	-3.09679	0.00195626	0.0169327
WBGene00006948	12054	wrt-2	59.7714	2.35173	0.486432	-4.83465	1.33382e-06	2.75284e-05
WBGene00004011	4564	pha-2	9.44248	2.35071	1.3066	-1.7991	0.0720022	0.234724
WBGene00000627	16976	col-50	2.39108	2.34849	5.87128	-0.399996	0.689159	NA
WBGene00023069	9907	rncs-1	1881.58	2.34385	0.914119	-2.56406	0.0103456	0.0622308
WBGene00003094	8030	lys-5	50.3589	2.34162	0.610664	-3.83455	0.000125794	0.00162927
WBGene00008556	3155	F07D3.3	7.5319	2.34054	1.18457	-1.97586	0.0481712	0.182089
WBGene00003703	18996	nhr-113	8.04223	2.33926	1.17212	-1.99576	0.0459604	0.176278
WBGene00200511	20395	R04B3.7	1.19777	2.33749	3.34904	-0.697959	0.485203	NA
WBGene00022887	4437	ZK1290.5	1131.24	2.33487	0.164995	-14.1512	1.83665e-45	7.41755e-43
WBGene00011099	2724	nhr-208	81.7055	2.33232	0.449239	-5.19172	2.08359e-07	4.87175e-06
WBGene00022346	2436	pals-17	297.401	2.33095	0.285053	-8.17725	2.90392e-16	2.04773e-14
WBGene00001943	3538	his-69	3.13298	2.33037	1.98254	-1.17545	0.239816	NA
WBGene00021804	12842	Y53G8AM.4	2.89573	2.3297	2.39139	-0.9742	0.329957	NA
WBGene00197431	17380	Y67D8C.15	0.650528	2.32969	5.51655	-0.42231	0.672799	NA
WBGene00219735	46492	linc-150	0.614079	2.32883	5.97086	-0.390032	0.696513	NA
WBGene00022630	14816	fbxa-223	7.11693	2.32694	1.16988	-1.98905	0.0466961	0.178105
WBGene00021798	6417	Y52E8A.6	14.141	2.32596	0.95337	-2.43972	0.0146985	0.0799731
WBGene00011136	21601	R08A2.5	4.9316	2.3259	2.13647	-1.08866	0.276302	0.51515
WBGene00003633	9038	nhr-43	368.754	2.32388	0.298042	-7.79716	6.33162e-15	3.80111e-13
WBGene00045808	16776	21ur-1627	0.861763	2.31334	4.30104	-0.537856	0.590677	NA
WBGene00013655	17650	lgc-19	3.51989	2.31189	1.59954	-1.44534	0.148362	0.359377
WBGene00022337	4419	pals-16	104.588	2.31077	0.351203	-6.57958	4.71783e-11	1.88819e-09
WBGene00220030	46628	M03F4.13	0.747831	2.30926	3.01513	-0.76589	0.443742	NA
WBGene00006109	15542	str-44	10.1714	2.30376	0.883671	-2.60703	0.00913304	0.0566471
WBGene00008043	135	C40H1.8	489.923	2.29731	0.293815	-7.81889	5.32916e-15	3.24312e-13
WBGene00219666	26439	linc-31	3.46777	2.29662	1.7606	-1.30445	0.19208	0.421338
WBGene00011450	21606	ttr-22	25.8517	2.28448	0.834056	-2.739	0.00616269	0.0423814
WBGene00198103	19402	C56E10.5	2.59764	2.2842	2.15789	-1.05853	0.289812	NA
WBGene00206488	18936	ZK757.10	2.83124	2.28406	2.22911	-1.02465	0.305528	NA
WBGene00009466	181	F36D1.7	134.642	2.28304	0.603941	-3.78023	0.000156685	0.00198171
WBGene00019684	21200	K12H6.4	8.30861	2.28264	1.33984	-1.70367	0.0884433	0.26422
WBGene00194926	1479	K08D8.12	106.074	2.28149	0.4794	-4.75905	1.94504e-06	3.88353e-05
WBGene00009526	682	clec-169	309.554	2.28062	0.323747	-7.04445	1.86195e-12	8.70707e-11
WBGene00005688	21512	sru-25	5.39703	2.28026	1.42504	-1.60013	0.109569	0.30018
WBGene00007804	22565	C29F3.3	4.82866	2.27709	1.63439	-1.39324	0.163548	0.380897
WBGene00022476	23950	fbxa-75	1.79527	2.27537	4.08486	-0.557026	0.57751	NA
WBGene00008993	13611	F21A3.3	533.546	2.27235	0.183135	-12.4081	2.36237e-35	6.55927e-33
WBGene00014403	27407	F56H6.14	0.608225	2.2678	5.43636	-0.417153	0.676566	NA
WBGene00021099	15804	W08F4.10	2.08077	2.26514	2.08203	-1.08795	0.276618	NA
WBGene00019973	5376	R09A1.3	383.431	2.26481	0.369451	-6.13019	8.77742e-10	2.94848e-08
WBGene00011670	19130	fbxa-84	114.709	2.25924	0.40268	-5.61051	2.01727e-08	5.61863e-07
WBGene00009423	19606	F35E8.10	5.06988	2.25549	1.55088	-1.45433	0.145855	0.355664
WBGene00010789	5674	sulp-5	127.015	2.25532	0.273016	-8.26077	1.4474e-16	1.05845e-14
WBGene00011495	237	T05F1.11	169.288	2.25474	0.269655	-8.36157	6.18865e-17	4.74019e-15
WBGene00011517	239	cgt-1	164.914	2.2508	0.332176	-6.77593	1.23608e-11	5.205e-10
WBGene00015222	18700	B0507.5	2.82144	2.24956	2.06619	-1.08875	0.276264	NA
WBGene00005240	1590	srh-15	3.04227	2.24695	1.804	-1.24554	0.212935	NA
WBGene00008106	12083	C45B11.5	4.17737	2.24346	2.01883	-1.11127	0.266454	0.505706
WBGene00000613	10990	col-36	1.90126	2.2417	4.13703	-0.541861	0.587915	NA
WBGene00012171	4720	W01B6.4	2.43555	2.24146	2.17007	-1.0329	0.301652	NA
WBGene00011549	3700	T06G6.8	2.37451	2.24071	2.23337	-1.00329	0.315722	NA
WBGene00020333	16711	sre-12	5.50942	2.24023	1.27077	-1.76289	0.0779191	0.245734
WBGene00009236	15600	F28H7.2	18.6052	2.2402	0.848865	-2.63905	0.00831377	0.053085
WBGene00011622	16062	T08G5.1	47.4615	2.24013	0.539215	-4.15442	3.26114e-05	0.000500808
WBGene00001158	20	ech-9	561.957	2.23517	0.349327	-6.39849	1.56917e-10	5.7375e-09
WBGene00044771	9925	tmem-218	2.8494	2.23513	2.18382	-1.02349	0.306075	NA
WBGene00011426	7698	T04C10.3	3.81659	2.23475	1.51973	-1.47049	0.141428	0.349635
WBGene00016219	311	pals-24	1874.29	2.2332	0.151222	-14.7677	2.36737e-49	1.16856e-46
WBGene00206501	15444	F14D7.18	1.24825	2.23315	3.31681	-0.673282	0.500768	NA
WBGene00007594	22560	lgc-23	14.2549	2.23195	0.897413	-2.4871	0.012879	0.0727927
WBGene00044557	9920	ZC13.10	8.17696	2.22973	1.47299	-1.51375	0.13009	0.333468
WBGene00196447	18901	F46C8.10	4.54255	2.22905	1.53045	-1.45646	0.145265	0.355215
WBGene00044912	22851	H38K22.7	6.19904	2.22761	1.52132	-1.46426	0.143124	0.351967
WBGene00194697	22880	F59A3.13	14.4777	2.22645	0.895685	-2.48575	0.012928	0.0730229
WBGene00235263	13463	Y66H1A.8	4.87423	2.22556	1.57233	-1.41546	0.156934	0.371928
WBGene00003663	17514	nhr-73	8.69096	2.22552	1.57384	-1.41407	0.157341	0.372454
WBGene00007858	16551	C31H5.7	36.868	2.22362	0.513045	-4.33416	1.46317e-05	0.000243679
WBGene00018353	7831	fbxa-182	426.382	2.22265	0.250525	-8.87196	7.18683e-19	6.65156e-17
WBGene00165999	18880	21ur-13107	1.7422	2.22033	2.47422	-0.897389	0.369511	NA
WBGene00005275	26618	srh-52	0.104692	2.21822	6.02984	-0.367875	0.712967	NA
WBGene00005288	26626	srh-67	0.104692	2.21822	6.02984	-0.367875	0.712967	NA
WBGene00005992	26821	srx-101	0.104692	2.21822	6.02984	-0.367875	0.712967	NA
WBGene00006269	20012	str-242	0.104692	2.21822	6.02984	-0.367875	0.712967	NA
WBGene00007373	27042	C06B8.11	0.104692	2.21822	6.02984	-0.367875	0.712967	NA
WBGene00007539	6605	B0334.12	0.104692	2.21822	6.02984	-0.367875	0.712967	NA
WBGene00010653	23404	K08C9.6	0.104692	2.21822	6.02984	-0.367875	0.712967	NA
WBGene00011159	23463	chil-17	0.104692	2.21822	6.02984	-0.367875	0.712967	NA
WBGene00011876	27206	srz-6	0.104692	2.21822	6.02984	-0.367875	0.712967	NA
WBGene00014845	27644	T23F1.2	0.104692	2.21822	6.02984	-0.367875	0.712967	NA
WBGene00015031	21132	B0207.8	0.104692	2.21822	6.02984	-0.367875	0.712967	NA
WBGene00017094	27766	E02C12.9	0.104692	2.21822	6.02984	-0.367875	0.712967	NA
WBGene00017209	27775	F07E5.4	0.104692	2.21822	6.02984	-0.367875	0.712967	NA
WBGene00017935	21707	srbc-70	0.104692	2.21822	6.02984	-0.367875	0.712967	NA
WBGene00020452	20599	fbxa-22	0.104692	2.21822	6.02984	-0.367875	0.712967	NA
WBGene00021300	16146	Y27F2A.9	0.104692	2.21822	6.02984	-0.367875	0.712967	NA
WBGene00023313	17813	H28G03.5	0.104692	2.21822	6.02984	-0.367875	0.712967	NA
WBGene00044146	28311	M163.10	0.104692	2.21822	6.02984	-0.367875	0.712967	NA
WBGene00044519	24077	F59A7.11	0.104692	2.21822	6.02984	-0.367875	0.712967	NA
WBGene00045057	20168	Y106G6G.7	0.104692	2.21822	6.02984	-0.367875	0.712967	NA
WBGene00045684	28669	21ur-5385	0.104692	2.21822	6.02984	-0.367875	0.712967	NA
WBGene00045803	28771	21ur-1769	0.104692	2.21822	6.02984	-0.367875	0.712967	NA
WBGene00045831	28794	21ur-646	0.104692	2.21822	6.02984	-0.367875	0.712967	NA
WBGene00046343	29256	21ur-2955	0.104692	2.21822	6.02984	-0.367875	0.712967	NA
WBGene00046683	29567	21ur-3369	0.104692	2.21822	6.02984	-0.367875	0.712967	NA
WBGene00048538	24311	21ur-1133	0.104692	2.21822	6.02984	-0.367875	0.712967	NA
WBGene00048565	18337	21ur-3471	0.104692	2.21822	6.02984	-0.367875	0.712967	NA
WBGene00048633	31301	21ur-4200	0.104692	2.21822	6.02984	-0.367875	0.712967	NA
WBGene00050347	32853	21ur-4204	0.104692	2.21822	6.02984	-0.367875	0.712967	NA
WBGene00050477	24404	21ur-1662	0.104692	2.21822	6.02984	-0.367875	0.712967	NA
WBGene00050664	33135	21ur-1492	0.104692	2.21822	6.02984	-0.367875	0.712967	NA
WBGene00050902	33330	T26F2.4	0.104692	2.21822	6.02984	-0.367875	0.712967	NA
WBGene00077789	24466	Y26D4A.22	0.104692	2.21822	6.02984	-0.367875	0.712967	NA
WBGene00165091	33539	21ur-13449	0.104692	2.21822	6.02984	-0.367875	0.712967	NA
WBGene00165252	17335	21ur-6922	0.104692	2.21822	6.02984	-0.367875	0.712967	NA
WBGene00165727	34103	21ur-7572	0.104692	2.21822	6.02984	-0.367875	0.712967	NA
WBGene00165826	34185	21ur-15384	0.104692	2.21822	6.02984	-0.367875	0.712967	NA
WBGene00168658	36712	21ur-11280	0.104692	2.21822	6.02984	-0.367875	0.712967	NA
WBGene00168862	36893	21ur-11010	0.104692	2.21822	6.02984	-0.367875	0.712967	NA
WBGene00169250	37226	21ur-13440	0.104692	2.21822	6.02984	-0.367875	0.712967	NA
WBGene00170258	38108	21ur-6092	0.104692	2.21822	6.02984	-0.367875	0.712967	NA
WBGene00170756	38543	21ur-9050	0.104692	2.21822	6.02984	-0.367875	0.712967	NA
WBGene00170879	24756	21ur-6131	0.104692	2.21822	6.02984	-0.367875	0.712967	NA
WBGene00171188	38922	21ur-10891	0.104692	2.21822	6.02984	-0.367875	0.712967	NA
WBGene00171211	38942	21ur-14191	0.104692	2.21822	6.02984	-0.367875	0.712967	NA
WBGene00172511	40076	21ur-13122	0.104692	2.21822	6.02984	-0.367875	0.712967	NA
WBGene00172516	40081	21ur-11602	0.104692	2.21822	6.02984	-0.367875	0.712967	NA
WBGene00174463	13398	21ur-5908	0.104692	2.21822	6.02984	-0.367875	0.712967	NA
WBGene00195265	42344	F47B7.9	0.104692	2.21822	6.02984	-0.367875	0.712967	NA
WBGene00195411	25069	Y17G7A.2	0.104692	2.21822	6.02984	-0.367875	0.712967	NA
WBGene00195787	42622	F40E10.7	0.104692	2.21822	6.02984	-0.367875	0.712967	NA
WBGene00196565	16312	F56F3.9	0.104692	2.21822	6.02984	-0.367875	0.712967	NA
WBGene00197306	16328	Y39A3CL.10	0.104692	2.21822	6.02984	-0.367875	0.712967	NA
WBGene00197347	43486	F11E6.20	0.104692	2.21822	6.02984	-0.367875	0.712967	NA
WBGene00197616	43645	C29A12.11	0.104692	2.21822	6.02984	-0.367875	0.712967	NA
WBGene00197840	14917	F58G11.8	0.104692	2.21822	6.02984	-0.367875	0.712967	NA
WBGene00198124	20791	D2024.14	0.104692	2.21822	6.02984	-0.367875	0.712967	NA
WBGene00198265	20797	Y39H10A.9	0.104692	2.21822	6.02984	-0.367875	0.712967	NA
WBGene00198295	44030	F25H10.5	0.104692	2.21822	6.02984	-0.367875	0.712967	NA
WBGene00198302	25612	Y102A11A.10	0.104692	2.21822	6.02984	-0.367875	0.712967	NA
WBGene00198338	44056	T25E4.4	0.104692	2.21822	6.02984	-0.367875	0.712967	NA
WBGene00198947	25720	F26A10.18	0.104692	2.21822	6.02984	-0.367875	0.712967	NA
WBGene00199040	20380	R07G3.13	0.104692	2.21822	6.02984	-0.367875	0.712967	NA
WBGene00200543	45298	C34E7.8	0.104692	2.21822	6.02984	-0.367875	0.712967	NA
WBGene00201155	45641	VF23B12L.1	0.104692	2.21822	6.02984	-0.367875	0.712967	NA
WBGene00201838	21428	C26E6.15	0.104692	2.21822	6.02984	-0.367875	0.712967	NA
WBGene00202316	21937	K02G10.14	0.104692	2.21822	6.02984	-0.367875	0.712967	NA
WBGene00219632	46482	linc-163	0.104692	2.21822	6.02984	-0.367875	0.712967	NA
WBGene00219663	2490	anr-10	0.104692	2.21822	6.02984	-0.367875	0.712967	NA
WBGene00220210	46723	Y76A2B.10	0.104692	2.21822	6.02984	-0.367875	0.712967	NA
WBGene00235282	16953	F17E9.18	0.104692	2.21822	6.02984	-0.367875	0.712967	NA
WBGene00005675	23143	sru-12	0.202384	2.21822	6.02984	-0.367875	0.712967	NA
WBGene00045283	24125	K08E4.8	0.202384	2.21822	6.02984	-0.367875	0.712967	NA
WBGene00006267	20493	str-239	0.231477	2.21822	6.02984	-0.367875	0.712967	NA
WBGene00005124	18015	srd-46	0.212003	2.21822	6.02984	-0.367875	0.712967	NA
WBGene00005276	26619	srh-53	0.212003	2.21822	6.02984	-0.367875	0.712967	NA
WBGene00018526	8329	F47B3.2	0.212003	2.21822	6.02984	-0.367875	0.712967	NA
WBGene00019036	23829	irld-36	0.212003	2.21822	6.02984	-0.367875	0.712967	NA
WBGene00197001	21885	C13C4.9	0.212003	2.21822	6.02984	-0.367875	0.712967	NA
WBGene00005282	13046	srh-60	0.234235	2.21822	6.02984	-0.367875	0.712967	NA
WBGene00005920	26802	srx-29	0.234235	2.21822	6.02984	-0.367875	0.712967	NA
WBGene00195405	16286	F59C6.17	0.234235	2.21822	6.02984	-0.367875	0.712967	NA
WBGene00199467	18413	F58D5.10	0.293901	2.21822	6.02984	-0.367875	0.712967	NA
WBGene00015895	27731	C17C3.13	0.302877	2.21822	6.02984	-0.367875	0.712967	NA
WBGene00050434	16208	21ur-1389	0.302877	2.21822	6.02984	-0.367875	0.712967	NA
WBGene00195441	16833	F07A11.9	0.268505	2.21822	6.02984	-0.367875	0.712967	NA
WBGene00169956	17869	21ur-10530	0.318026	2.21822	6.02984	-0.367875	0.712967	NA
WBGene00000861	26454	cwp-3	0.475472	2.21822	6.02984	-0.367875	0.712967	NA
WBGene00044058	28302	F17B5.6	0.846179	2.21822	6.02984	-0.367875	0.712967	NA
WBGene00005515	23116	sri-3	0.414839	2.21822	6.02984	-0.367875	0.712967	NA
WBGene00016881	23758	C52E2.2	0.414839	2.21822	6.02984	-0.367875	0.712967	NA
WBGene00005413	23095	srh-202	0.522485	2.21822	6.02984	-0.367875	0.712967	NA
WBGene00012729	23534	Y39G8B.10	0.559103	2.21822	6.02984	-0.367875	0.712967	NA
WBGene00005883	23198	srw-136	0.539732	2.21822	6.02984	-0.367875	0.712967	NA
WBGene00044091	14826	srbc-60	0.789097	2.21822	6.02863	-0.367948	0.712912	NA
WBGene00005598	26710	srj-10	0.402621	2.21822	6.02984	-0.367874	0.712967	NA
WBGene00219822	46520	C17H12.36	0.431993	2.21822	6.02984	-0.367874	0.712967	NA
WBGene00005432	17024	srh-222	0.498729	2.21822	6.02983	-0.367874	0.712967	NA
WBGene00013494	23557	irld-58	0.244196	2.21822	6.02984	-0.367874	0.712967	NA
WBGene00005521	26699	sri-9	0.203734	2.21822	6.02984	-0.367874	0.712967	NA
WBGene00199609	44767	B0414.12	0.203734	2.21822	6.02984	-0.367874	0.712967	NA
WBGene00200355	17408	F22A3.15	0.313948	2.21822	6.02984	-0.367874	0.712967	NA
WBGene00199091	44466	F32G8.10	0.253254	2.21822	6.02984	-0.367874	0.712967	NA
WBGene00005161	23027	srg-3	0.25123	2.21822	6.02984	-0.367874	0.712967	NA
WBGene00169389	37349	21ur-11369	0.300077	2.21822	6.02984	-0.367874	0.712967	NA
WBGene00201735	20899	C04A2.12	0.300077	2.21822	6.02984	-0.367874	0.712967	NA
WBGene00007995	27062	C37E2.3	0.341888	2.21822	6.02984	-0.367874	0.712967	NA
WBGene00006205	22015	str-160	0.301426	2.21822	6.02984	-0.367874	0.712967	NA
WBGene00195528	15899	K08B5.3	0.351507	2.21822	6.02984	-0.367874	0.712967	NA
WBGene00012505	23520	pals-13	0.330518	2.21822	6.02984	-0.367874	0.712967	NA
WBGene00047952	30700	21ur-1957	0.400353	2.21822	6.02984	-0.367874	0.712967	NA
WBGene00202346	16926	Y105E8B.14	0.438511	2.21822	6.02984	-0.367874	0.712967	NA
WBGene00010588	23398	srz-14	0.571474	2.21822	6.02984	-0.367874	0.712967	NA
WBGene00015909	20090	clec-124	0.518901	2.21822	6.02984	-0.367874	0.712967	NA
WBGene00195965	20303	F26A10.7	0.495461	2.21822	6.02984	-0.367874	0.712967	NA
WBGene00197492	9960	T06H11.10	0.174444	2.21822	6.02984	-0.367874	0.712967	NA
WBGene00006251	27005	str-220	0.154213	2.21822	6.02984	-0.367874	0.712967	NA
WBGene00169297	18358	21ur-10743	0.153538	2.21822	6.02984	-0.367874	0.712967	NA
WBGene00200452	17410	F46G11.17	0.165161	2.21822	6.02984	-0.367874	0.712967	NA
WBGene00200590	12938	T05B11.11	0.168084	2.21822	6.02984	-0.367874	0.712967	NA
WBGene00199865	44915	C31H2.12	0.158348	2.21822	6.02984	-0.367874	0.712967	NA
WBGene00220196	46715	Y71G10AR.5	0.158348	2.21822	6.02984	-0.367874	0.712967	NA
WBGene00018553	17732	srt-60	0.203785	2.21822	6.02984	-0.367874	0.712967	NA
WBGene00005071	13541	srb-6	0.479873	2.21822	6.02984	-0.367874	0.712967	NA
WBGene00022960	20136	C43G2.t2	0.497766	2.21822	6.02984	-0.367874	0.712967	NA
WBGene00009425	9143	scl-16	0.484716	2.21822	6.02984	-0.367874	0.712967	NA
WBGene00195801	25145	F35B12.11	0.223248	2.21822	6.02984	-0.367874	0.712967	NA
WBGene00170977	24765	21ur-15284	0.22329	2.21822	6.02984	-0.367874	0.712967	NA
WBGene00014991	16099	ZK829.12	0.222573	2.21822	6.02984	-0.367874	0.712967	NA
WBGene00171201	24775	21ur-14267	0.222573	2.21822	6.02984	-0.367874	0.712967	NA
WBGene00005669	26729	sru-6	0.649989	2.21822	6.02984	-0.367874	0.712967	NA
WBGene00196821	43202	F29C4.9	0.218817	2.21822	6.02984	-0.367874	0.712967	NA
WBGene00200795	13939	C08B11.12	0.248142	2.21822	6.02984	-0.367874	0.712967	NA
WBGene00166919	21295	21ur-11378	0.264254	2.21822	6.02984	-0.367874	0.712967	NA
WBGene00045089	20170	C05H8.3	0.25744	2.21822	6.02984	-0.367874	0.712967	NA
WBGene00021617	19302	Y47D7A.3	0.293042	2.21822	6.02984	-0.367874	0.712967	NA
WBGene00008126	20022	sre-21	0.578401	2.21822	6.02984	-0.367874	0.712967	NA
WBGene00199471	16368	C17G10.11	0.294665	2.21822	6.02984	-0.367874	0.712967	NA
WBGene00201942	13946	F12F6.19	0.281755	2.21822	6.02984	-0.367874	0.712967	NA
WBGene00005400	14049	srh-185	0.36627	2.21822	6.02984	-0.367874	0.712967	NA
WBGene00201597	45893	Y102A11A.15	0.543578	2.21822	6.02984	-0.367874	0.712967	NA
WBGene00077759	24465	irld-51	0.710344	2.21822	6.02984	-0.367874	0.712967	NA
WBGene00007535	23294	ttr-19	0.352833	2.21822	6.02984	-0.367874	0.712967	NA
WBGene00196670	25310	ZK507.7	0.562356	2.21822	6.02984	-0.367874	0.712967	NA
WBGene00167545	20228	21ur-14400	0.381281	2.21822	6.02984	-0.367874	0.712967	NA
WBGene00201333	26176	H40L08.5	0.793792	2.21822	6.02984	-0.367874	0.712967	NA
WBGene00197168	43380	ZC504.9	0.40356	2.21822	6.02984	-0.367874	0.712967	NA
WBGene00169122	37117	21ur-10790	0.151367	2.21822	6.02984	-0.367874	0.712968	NA
WBGene00200908	26105	K07F5.20	0.151367	2.21822	6.02984	-0.367874	0.712968	NA
WBGene00201765	45993	C10H11.13	0.151367	2.21822	6.02984	-0.367874	0.712968	NA
WBGene00169831	22871	21ur-14362	0.200213	2.21822	6.02984	-0.367874	0.712968	NA
WBGene00196578	43067	F55C12.10	0.470449	2.21822	6.02984	-0.367874	0.712968	NA
WBGene00196424	25274	F54E4.8	0.360723	2.21822	6.02984	-0.367873	0.712968	NA
WBGene00197989	25545	R07D5.5	0.414411	2.21822	6.02984	-0.367873	0.712968	NA
WBGene00046612	29507	21ur-3076	0.483053	2.21822	6.02984	-0.367873	0.712968	NA
WBGene00016306	23727	C32B5.13	0.198042	2.21822	6.02984	-0.367873	0.712968	NA
WBGene00048783	31432	21ur-2948	0.198042	2.21822	6.02984	-0.367873	0.712968	NA
WBGene00049015	31644	21ur-4658	0.300544	2.21822	6.02984	-0.367873	0.712968	NA
WBGene00020252	11320	T05C1.5	0.327585	2.21822	6.02984	-0.367873	0.712968	NA
WBGene00022536	17287	ZC178.2	0.327585	2.21822	6.02984	-0.367873	0.712968	NA
WBGene00077703	33436	K08E5.5	0.396228	2.21822	6.02984	-0.367873	0.712968	NA
WBGene00016543	23741	srsx-14	0.464331	2.21822	6.02984	-0.367873	0.712968	NA
WBGene00014862	21131	Y7A9C.2	0.532931	2.21822	6.02984	-0.367873	0.712968	NA
WBGene00167786	35929	21ur-9657	0.336829	2.21822	6.02984	-0.367873	0.712968	NA
WBGene00016519	20566	srz-56	0.646761	2.21822	6.02984	-0.367873	0.712968	NA
WBGene00199899	10948	F53G12.16	0.350065	2.21822	6.02984	-0.367873	0.712968	NA
WBGene00198496	25644	ZC504.12	0.406771	2.21822	6.02984	-0.367873	0.712968	NA
WBGene00199329	14425	F11D5.21	0.285785	2.21822	6.02984	-0.367873	0.712968	NA
WBGene00196686	15413	F42E11.5	0.379012	2.21822	6.02984	-0.367873	0.712968	NA
WBGene00011177	19119	R09E10.8	0.480601	2.21822	6.02984	-0.367873	0.712968	NA
WBGene00199487	25835	K08E4.11	0.390485	2.21822	6.02984	-0.367873	0.712968	NA
WBGene00005349	11053	srh-132	0.644445	2.21822	6.02984	-0.367873	0.712968	NA
WBGene00200494	10951	D2089.7	0.361408	2.21822	6.02984	-0.367873	0.712968	NA
WBGene00199224	20823	F52B10.17	0.50997	2.21822	6.02984	-0.367873	0.712968	NA
WBGene00020603	27888	T20B12.5	0.522813	2.21822	6.02984	-0.367873	0.712968	NA
WBGene00005396	23090	srh-181	0.482435	2.21822	6.02984	-0.367873	0.712968	NA
WBGene00045101	16177	C35D6.13	0.687439	2.21822	6.02984	-0.367873	0.712968	NA
WBGene00020923	23901	W02B3.3	0.438399	2.21822	6.02984	-0.367873	0.712968	NA
WBGene00199507	44702	R173.10	0.544254	2.21822	6.02984	-0.367873	0.712968	NA
WBGene00005259	26617	srh-36	0.645063	2.21821	6.02983	-0.367873	0.712968	NA
WBGene00023270	19324	F17E9.14	1.00889	2.21821	6.02983	-0.367873	0.712968	NA
WBGene00195172	25033	K10G4.14	0.493859	2.21803	5.93156	-0.373937	0.708452	NA
WBGene00047205	18336	21ur-1749	1.07665	2.21799	3.10507	-0.714315	0.475033	NA
WBGene00010800	16052	srsx-37	0.508991	2.21791	5.87224	-0.377694	0.705658	NA
WBGene00044804	28362	ZK938.8	0.581116	2.21731	5.60381	-0.395679	0.692342	NA
WBGene00015575	20083	srbc-35	1.18039	2.21727	5.58727	-0.396843	0.691483	NA
WBGene00050182	11895	21ur-347	0.664604	2.2172	5.55612	-0.399055	0.689853	NA
WBGene00001223	26455	ehn-3	1.06226	2.21707	5.50755	-0.402552	0.687278	NA
WBGene00220045	46635	R31.6	0.631265	2.21702	5.48578	-0.40414	0.68611	NA
WBGene00015262	10241	B0563.5	62.2454	2.21692	0.557647	-3.97549	7.02355e-05	0.000980428
WBGene00001528	11004	gcy-1	0.643507	2.21681	5.40458	-0.410172	0.68168	NA
WBGene00206473	14950	B0273.115	2.98119	2.21654	1.87798	-1.18028	0.237889	NA
WBGene00200306	22922	F10D7.9	0.849726	2.21636	5.24622	-0.422468	0.672683	NA
WBGene00015530	23693	C06E4.1	0.907975	2.21621	5.19492	-0.426611	0.669663	NA
WBGene00199751	25887	T05E11.10	0.783582	2.21614	5.17347	-0.428367	0.668384	NA
WBGene00044370	28325	C41H7.9	0.87221	2.21571	5.04079	-0.439557	0.660258	NA
WBGene00014190	23585	irld-62	1.12321	2.2156	5.00569	-0.442615	0.658044	NA
WBGene00005986	8581	srx-95	0.882446	2.21506	4.85345	-0.456388	0.648111	NA
WBGene00201986	17925	ZK370.11	0.644724	2.21474	4.77392	-0.463926	0.642701	NA
WBGene00196456	21344	F18E9.10	0.668142	2.21459	4.73656	-0.467552	0.640105	NA
WBGene00005511	17026	srh-307	0.715323	2.21442	4.69614	-0.471541	0.637255	NA
WBGene00196522	25286	Y32F6A.7	0.867989	2.21305	4.40293	-0.502631	0.615224	NA
WBGene00023463	14346	srz-82	1.094	2.21248	4.29861	-0.514697	0.606765	NA
WBGene00013059	27252	Y51A2A.3	0.789393	2.21247	4.29558	-0.515057	0.606513	NA
WBGene00013047	9720	Y50E8A.2	1.09317	2.21202	4.21962	-0.524223	0.600123	NA
WBGene00005845	5573	srw-98	1.70266	2.21086	4.03897	-0.547382	0.584116	NA
WBGene00023481	20153	srz-22	1.33584	2.20997	3.9186	-0.56397	0.572774	NA
WBGene00198126	20792	F32G8.9	0.857159	2.2097	3.88248	-0.569145	0.569257	NA
WBGene00049470	16782	21ur-1041	0.887855	2.20944	3.85054	-0.573801	0.566103	NA
WBGene00018243	27807	F40G9.7	2.21826	2.20876	3.77007	-0.585866	0.557965	NA
WBGene00006244	26999	str-211	1.34048	2.20847	3.73742	-0.590908	0.554582	NA
WBGene00023252	1958	C39H7.2	32.5924	2.20691	0.569425	-3.87568	0.000106326	0.00141213
WBGene00044587	18319	srz-105	1.23775	2.20558	3.45723	-0.637961	0.523499	NA
WBGene00019106	7847	irld-38	1.89241	2.20404	2.78958	-0.790098	0.42947	NA
WBGene00011933	5693	oac-47	2.5371	2.2033	3.28045	-0.671645	0.50181	NA
WBGene00010032	9667	F54B11.9	7.70626	2.20282	1.50791	-1.46084	0.14406	0.353694
WBGene00008199	9121	C49C3.9	3528.38	2.2023	0.285494	-7.71399	1.21942e-14	6.96757e-13
WBGene00013815	7236	Y116A8C.44	1.30948	2.20226	3.21058	-0.685939	0.492751	NA
WBGene00015081	5267	B0244.6	210.897	2.20172	0.336373	-6.54547	5.93101e-11	2.34209e-09
WBGene00016370	8767	C33H5.1	1.42133	2.20096	3.12901	-0.703404	0.481804	NA
WBGene00235307	18955	B0507.17	2.03798	2.20004	3.07566	-0.715305	0.474421	NA
WBGene00007863	22567	C32C4.3	18.1247	2.19848	1.1369	-1.93375	0.0531441	0.194475
WBGene00009849	7659	F48F7.3	2.70676	2.19761	2.9499	-0.744976	0.456286	NA
WBGene00219874	8475	F01D4.12	1.9391	2.19609	2.87986	-0.762567	0.445722	NA
WBGene00206527	9971	T27A8.7	1.87427	2.19508	2.83675	-0.773802	0.439048	NA
WBGene00010969	9683	R01E6.5	8.07011	2.19449	1.50343	-1.45966	0.144385	0.35399
WBGene00195820	21875	T22E5.10	2.90831	2.19291	2.75111	-0.797097	0.425395	NA
WBGene00269333	17455	F46F5.19	4.33074	2.19219	2.72546	-0.80434	0.4212	0.648478
WBGene00045415	4958	Y43F8B.15	19.351	2.19176	0.749905	-2.92272	0.00346992	0.0269378
WBGene00202384	8962	Y53C10A.23	1.69284	2.19139	2.47636	-0.884925	0.376197	NA
WBGene00044364	28324	nspf-1	2.62007	2.19086	2.67925	-0.817713	0.413521	NA
WBGene00044602	17840	C31B8.16	3.98356	2.19041	1.63098	-1.343	0.179271	0.40386
WBGene00017487	13763	F15E6.6	946.302	2.18587	0.249367	-8.76569	1.85631e-18	1.65762e-16
WBGene00006138	23245	str-78	2.26693	2.18495	2.50561	-0.872025	0.383195	NA
WBGene00010167	7667	bgnt-1.6	2.90619	2.18414	2.48504	-0.878917	0.379446	NA
WBGene00016755	12734	C49A9.1	24.7963	2.18376	0.75623	-2.88769	0.00388082	0.029246
WBGene00201568	19921	Y73B6BL.286	0.995344	2.18337	4.27112	-0.511193	0.609216	NA
WBGene00011208	23466	R10E8.2	0.943287	2.18284	4.75738	-0.458832	0.646355	NA
WBGene00021972	13835	glb-31	5.2869	2.18279	1.41563	-1.54191	0.123094	0.3231
WBGene00013619	21643	fbxa-112	0.530804	2.18208	5.97764	-0.365041	0.715081	NA
WBGene00049143	31762	21ur-1504	0.332618	2.18208	5.97764	-0.365041	0.715081	NA
WBGene00014673	21127	C08H9.9	6.49018	2.18168	1.24805	-1.74806	0.0804529	0.24995
WBGene00005005	15030	spp-20	155.482	2.18128	0.36031	-6.05391	1.41375e-09	4.62659e-08
WBGene00008643	23329	tmem-138	2.85889	2.18053	2.1419	-1.01803	0.308662	NA
WBGene00219252	26405	mir-4815	0.882636	2.18052	3.65714	-0.596238	0.551016	NA
WBGene00015221	23683	B0507.4	3.69857	2.17896	2.3677	-0.920286	0.357423	0.592593
WBGene00016646	23744	fbxc-5	7.96324	2.17832	1.08555	-2.00666	0.0447861	0.173376
WBGene00016649	27746	fbxc-1	7.96324	2.17832	1.08555	-2.00666	0.0447861	0.173376
WBGene00009900	5162	F49E12.7	4.43687	2.17823	1.49621	-1.45583	0.145439	0.355299
WBGene00195004	6464	K08D12.8	5.87616	2.17738	1.40421	-1.55061	0.120996	0.31986
WBGene00019471	368	cyp-35B2	9.75039	2.17489	1.47464	-1.47486	0.140251	0.348205
WBGene00012254	17626	W04E12.9	2.07745	2.17054	2.48681	-0.872819	0.382762	NA
WBGene00015950	22203	C18A11.4	30.0695	2.16982	0.839083	-2.58594	0.00971126	0.0594041
WBGene00022581	5433	ZC262.4	6.48499	2.15845	0.977093	-2.20905	0.0271709	0.123707
WBGene00003333	22982	mir-239.2	3.08157	2.15569	1.57136	-1.37186	0.170107	NA
WBGene00008357	142	nspc-16	126.115	2.15356	0.370983	-5.80501	6.43609e-09	1.93191e-07
WBGene00019388	15267	K04F1.9	296.625	2.15331	0.331273	-6.50011	8.02617e-11	3.07382e-09
WBGene00011556	19129	vglu-3	266.552	2.15217	0.257031	-8.3732	5.60733e-17	4.31352e-15
WBGene00021223	27907	Y19D10A.8	3.84317	2.1487	1.44459	-1.48741	0.136907	0.343766
WBGene00003807	568	npr-1	12.5895	2.14512	1.67366	-1.2817	0.19995	0.430418
WBGene00007319	20498	C05B5.1	6.67522	2.14412	1.28172	-1.67285	0.094357	0.274302
WBGene00015243	9252	B0524.4	6.94383	2.1416	1.26399	-1.69431	0.0902062	0.267428
WBGene00020873	2406	T28A11.6	34.0877	2.14155	0.777748	-2.75353	0.00589562	0.04086
WBGene00008141	22043	C47E8.1	15.4692	2.14061	0.723439	-2.95894	0.00308697	0.0244891
WBGene00019839	22281	R02F11.1	87.3057	2.13863	0.365703	-5.84801	4.97501e-09	1.52023e-07
WBGene00009446	19607	F35H8.1	17.8756	2.13703	1.06305	-2.01028	0.0444011	0.172385
WBGene00005172	18016	srg-15	6.15542	2.1369	1.26194	-1.69334	0.0903901	0.267717
WBGene00002257	12505	lbp-5	852.149	2.1364	0.223072	-9.5772	9.97093e-22	1.19719e-19
WBGene00008623	22585	spe-43	7.02841	2.13538	1.3708	-1.55776	0.119289	0.317046
WBGene00013995	21118	mboa-5	4.22789	2.13535	1.39256	-1.5334	0.125178	0.326208
WBGene00018870	27830	F55C12.2	0.615337	2.13346	5.9748	-0.357076	0.721035	NA
WBGene00008629	4154	cpt-5	856.435	2.13173	0.254033	-8.39156	4.7972e-17	3.73887e-15
WBGene00022486	1950	fbxa-61	141.053	2.13116	0.284934	-7.47948	7.46163e-14	3.96985e-12
WBGene00017690	4834	ceh-60	645.879	2.13115	0.221052	-9.64096	5.36861e-22	6.48981e-20
WBGene00168913	36935	21ur-10177	0.0979331	2.12706	6.03512	-0.352448	0.724503	NA
WBGene00196481	15412	F56D12.9	0.0979331	2.12706	6.03512	-0.352448	0.724503	NA
WBGene00048725	31379	21ur-1534	0.151589	2.12706	6.03512	-0.352448	0.724503	NA
WBGene00200418	17409	C05H8.4	0.237437	2.12706	6.03512	-0.352448	0.724503	NA
WBGene00049392	16781	21ur-5141	0.228154	2.12706	6.03512	-0.352448	0.724503	NA
WBGene00173188	24898	21ur-7501	0.268392	2.12706	6.03512	-0.352448	0.724503	NA
WBGene00200598	14931	C07G2.4	0.283643	2.12706	6.03512	-0.352448	0.724503	NA
WBGene00197284	43448	T24A11.5	0.484169	2.12706	6.02396	-0.3531	0.724013	NA
WBGene00168411	36491	21ur-14134	0.785139	2.12675	4.53008	-0.469472	0.638732	NA
WBGene00235301	3488	B0513.90	0.956461	2.1266	4.15756	-0.511502	0.608999	NA
WBGene00201541	21425	H14A12.9	0.733563	2.12644	3.84171	-0.553516	0.57991	NA
WBGene00220133	18948	Y14H12A.4	1.06379	2.12638	3.73591	-0.569172	0.569239	NA
WBGene00001079	12995	dpy-20	16.5863	2.126	1.24235	-1.71128	0.0870303	0.262124
WBGene00014552	27518	W09D6.t1	0.831429	2.12577	3.05574	-0.695665	0.486639	NA
WBGene00008097	13084	ugt-15	176.713	2.1244	0.46892	-4.53041	5.88707e-06	0.000107296
WBGene00022747	9904	ZK470.6	12.3886	2.12213	0.974733	-2.17714	0.0294701	0.131085
WBGene00009827	15111	hmg-6	3.61309	2.12208	2.25496	-0.94107	0.346669	0.582535
WBGene00011677	3235	cyp-13A1	133.392	2.12167	0.381286	-5.56451	2.62883e-08	7.15379e-07
WBGene00019089	9332	clec-206	5.44173	2.11965	1.34435	-1.57671	0.114862	0.309304
WBGene00007231	18555	C01G10.4	4.45819	2.11844	1.63552	-1.29527	0.195227	0.424677
WBGene00018502	3829	F46F5.11	9.55806	2.11728	1.4255	-1.48529	0.137467	0.34459
WBGene00012923	11690	fbxa-128	313.372	2.11714	0.330705	-6.40189	1.53464e-10	5.62279e-09
WBGene00008333	11610	C55A6.4	535.201	2.11592	0.314143	-6.73553	1.63337e-11	6.82941e-10
WBGene00013566	20540	Y75B12A.2	9.1722	2.11494	1.45163	-1.45694	0.145133	0.355127
WBGene00196403	42955	F33C8.6	0.320826	2.11405	5.97914	-0.353571	0.723661	NA
WBGene00008064	11604	C41G7.7	3.56173	2.1133	1.82694	-1.15674	0.247377	0.485711
WBGene00198037	43891	K03H4.4	0.740006	2.11328	5.40179	-0.391218	0.695636	NA
WBGene00020487	10336	T13C5.7	7.56903	2.11081	1.43893	-1.46693	0.142396	0.350954
WBGene00008025	5616	C39B10.5	8.63053	2.10732	1.16233	-1.81302	0.0698284	0.229915
WBGene00020039	3864	R12E2.14	52.287	2.10645	0.852601	-2.47061	0.0134882	0.0750768
WBGene00005083	15521	srd-5	8.92214	2.10435	1.19458	-1.76158	0.0781409	0.246112
WBGene00015226	10712	B0507.9	14.8	2.10366	1.28268	-1.64005	0.100994	0.286058
WBGene00007716	651	fbxa-82	79.4932	2.10224	0.376699	-5.58069	2.39561e-08	6.61026e-07
WBGene00011417	16060	T04A11.2	20.856	2.10033	0.733692	-2.86268	0.00420075	0.031181
WBGene00011420	27175	T04A11.5	20.9924	2.10028	0.739886	-2.83866	0.00453036	0.0331331
WBGene00018256	12261	cutl-28	26.8775	2.09612	0.662635	-3.16331	0.00155988	0.014092
WBGene00000637	4012	col-61	11.6115	2.09408	1.10414	-1.89657	0.0578844	0.204738
WBGene00006143	13057	str-84	2.01113	2.09404	2.72508	-0.768434	0.442229	NA
WBGene00008180	19066	C48D5.3	3.24627	2.09315	1.45194	-1.44162	0.149409	0.360683
WBGene00005196	21002	srg-39	4.76204	2.08941	1.67354	-1.2485	0.21185	0.444092
WBGene00021245	10840	Y22D7AL.6	23.7563	2.08703	0.776795	-2.68671	0.00721585	0.0476144
WBGene00012270	6226	W04G5.10	3.82904	2.0863	2.09154	-0.997496	0.318524	0.556726
WBGene00022611	7404	ZC449.1	20.0131	2.08299	0.726741	-2.86621	0.0041542	0.0309648
WBGene00044673	11380	C07D10.6	6.36641	2.08284	2.03453	-1.02374	0.305956	0.54412
WBGene00016542	1306	C39H7.4	959.325	2.08208	0.238554	-8.72792	2.59398e-18	2.30476e-16
WBGene00220140	2990	Y34F4.7	13.5713	2.08172	0.85879	-2.42401	0.0153501	0.0827082
WBGene00004165	1564	pqn-84	8.16053	2.08001	1.23933	-1.67834	0.0932814	0.272588
WBGene00018345	13776	F42C5.3	104.951	2.07895	0.329587	-6.30773	2.83159e-10	1.01242e-08
WBGene00021520	410	Y41D4B.18	101.74	2.07844	0.399424	-5.20359	1.95475e-07	4.5947e-06
WBGene00018918	6826	F56A4.10	3.79082	2.07754	1.47868	-1.40499	0.160023	0.376188
WBGene00011443	14639	cutl-11	17.5078	2.0755	0.717195	-2.89391	0.00380474	0.0287948
WBGene00020748	19289	nhr-221	5.28586	2.07451	1.83251	-1.13206	0.257609	0.496385
WBGene00012596	12173	nhr-234	10.6597	2.07297	1.05199	-1.97052	0.048779	0.183567
WBGene00001962	11016	hlh-19	0.928862	2.07194	3.42336	-0.605237	0.545021	NA
WBGene00012256	5220	lpr-5	128.313	2.07103	0.370675	-5.58719	2.30774e-08	6.38762e-07
WBGene00005206	18018	srg-49	4.15128	2.07084	1.67522	-1.23616	0.216399	0.449425
WBGene00023307	16748	H06I04.t1	0.9805	2.07041	3.26423	-0.634272	0.525904	NA
WBGene00007437	6129	C08E8.1	2.92357	2.07021	2.37081	-0.873208	0.38255	NA
WBGene00010467	15119	K01D12.8	4.37791	2.06967	2.38299	-0.868519	0.385111	0.61605
WBGene00020485	20600	ceh-54	2.87731	2.06643	2.01809	-1.02395	0.305857	NA
WBGene00015600	17677	fbxa-165	0.93061	2.06585	4.71624	-0.43803	0.661365	NA
WBGene00045238	10891	rpr-1	3.17593	2.06523	2.49162	-0.82887	0.407178	NA
WBGene00010885	18636	M7.9	3.40652	2.06512	2.27177	-0.909032	0.363333	0.598203
WBGene00022529	9900	srt-14	11.4287	2.06447	0.961394	-2.14738	0.0317634	0.137708
WBGene00017869	8798	F28A10.1	10.2741	2.06443	0.838866	-2.46097	0.013856	0.0766807
WBGene00044377	24070	Y49F6B.13	1.97022	2.06351	2.96687	-0.695518	0.486731	NA
WBGene00019215	1377	H20E11.3	420.684	2.06295	0.271468	-7.59922	2.97912e-14	1.63897e-12
WBGene00219614	18942	linc-105	1.5526	2.06259	2.63089	-0.78399	0.433046	NA
WBGene00015379	17177	C03B1.9	2.08219	2.06248	2.56876	-0.802907	0.422029	NA
WBGene00168999	24667	21ur-10758	1.9635	2.06185	2.58747	-0.79686	0.425532	NA
WBGene00008271	3148	C53B4.1	20.1084	2.06032	1.00922	-2.04149	0.0412017	0.164999
WBGene00018172	23801	F38B6.2	2.21615	2.05841	2.7003	-0.762288	0.445888	NA
WBGene00016224	6773	fbxa-57	40.2108	2.05716	0.587073	-3.5041	0.000458161	0.00506629
WBGene00007875	131	dod-24	1397.57	2.05708	0.25559	-8.04835	8.39151e-16	5.54339e-14
WBGene00004099	10535	abu-15	54.7345	2.05675	0.658702	-3.12243	0.00179367	0.0157712
WBGene00015712	5770	sre-11	2.24318	2.05521	2.82246	-0.72816	0.466515	NA
WBGene00020637	23887	fbxa-7	2.39895	2.05501	2.83032	-0.72607	0.467796	NA
WBGene00010656	20046	K08D8.2	2.50722	2.05472	2.44479	-0.840447	0.400658	NA
WBGene00011089	5681	kmo-1	956.443	2.05312	0.186291	-11.021	3.02526e-28	5.78053e-26
WBGene00013028	15655	efhc-1	5.8495	2.05311	1.51257	-1.35737	0.174665	0.396625
WBGene00220159	26887	Y44A6C.3	1.44296	2.05309	2.91414	-0.704528	0.481104	NA
WBGene00016220	12728	C29F9.5	2.48284	2.05272	2.93138	-0.700257	0.483767	NA
WBGene00007440	642	C08E8.4	878.597	2.05264	0.35113	-5.84581	5.04096e-09	1.53387e-07
WBGene00000412	12	cdr-1	253.577	2.0522	0.314718	-6.52075	6.99554e-11	2.70829e-09
WBGene00219713	12953	linc-27	1.24789	2.05076	3.02879	-0.677089	0.498349	NA
WBGene00173683	24924	21ur-14029	1.30948	2.05046	3.04482	-0.673426	0.500677	NA
WBGene00009134	16571	lurp-2	2.08074	2.05035	3.05045	-0.672147	0.50149	NA
WBGene00006111	21030	str-46	1.26923	2.05022	3.05764	-0.670523	0.502525	NA
WBGene00199437	17913	C08G9.6	1.36353	2.04999	3.07046	-0.667647	0.504359	NA
WBGene00009281	13105	F31B9.4	1.46684	2.04932	3.108	-0.659368	0.509659	NA
WBGene00014162	22171	chil-9	2.49848	2.0493	3.10907	-0.659135	0.509809	NA
WBGene00044564	24081	ZK813.6	2.55245	2.0492	3.11446	-0.657962	0.510562	NA
WBGene00015655	8273	C09G12.5	2.15431	2.04851	3.15506	-0.649278	0.516159	NA
WBGene00020381	17248	T09B4.7	23.517	2.04834	0.588749	-3.47914	0.000503029	0.00548395
WBGene00022338	5919	Y82E9BR.5	55.583	2.04809	0.60643	-3.3773	0.000732021	0.007463
WBGene00008290	27075	bgnt-1.8	1.28894	2.0471	3.24388	-0.631065	0.527998	NA
WBGene00007662	22562	pals-8	6.74642	2.04671	1.44292	-1.41845	0.15606	0.370697
WBGene00005446	23102	srh-239	1.27909	2.04664	3.27429	-0.625064	0.531929	NA
WBGene00015599	10252	fbxa-164	11.0361	2.04651	0.967087	-2.11616	0.034331	0.14553
WBGene00005696	23150	sru-33	1.56806	2.04605	3.31556	-0.617107	0.537164	NA
WBGene00202423	10458	ZK867.23	3.48096	2.0437	1.8127	-1.12743	0.259559	0.498202
WBGene00019977	22288	fpn-1.2	222.459	2.04357	0.361044	-5.66017	1.51224e-08	4.29272e-07
WBGene00020352	11823	T08B6.2	21.1528	2.04326	0.908967	-2.24789	0.024583	0.115766
WBGene00007383	13583	C06C6.9	1.01773	2.04319	3.54198	-0.576849	0.564041	NA
WBGene00195499	11424	H22K11.5	1.30779	2.04308	3.55148	-0.575274	0.565106	NA
WBGene00165122	14376	21ur-7774	0.963443	2.0424	3.61393	-0.565146	0.571975	NA
WBGene00235374	9480	R11E3.19	1.21993	2.04213	3.6389	-0.561195	0.574665	NA
WBGene00019966	13281	srt-30	1.76026	2.04205	3.64689	-0.559943	0.575518	NA
WBGene00198647	16354	Y34B4A.15	0.925879	2.0416	3.69149	-0.553057	0.580224	NA
WBGene00009332	20509	F32D8.8	4.52127	2.04099	1.52211	-1.34089	0.179956	0.404958
WBGene00014813	10233	M176.9	69.0258	2.04098	0.412333	-4.94983	7.42798e-07	1.60578e-05
WBGene00005794	26762	srw-47	1.21652	2.04093	3.7613	-0.542613	0.587396	NA
WBGene00003761	3570	nlp-23	3.28644	2.04046	1.45533	-1.40206	0.160899	0.377384
WBGene00011983	23495	fbxa-81	1.11348	2.0401	3.8538	-0.529372	0.596547	NA
WBGene00185095	15891	W09C2.7	2.96848	2.03943	1.90455	-1.07082	0.284251	NA
WBGene00194957	2975	Y116A8C.465	1.32704	2.03866	3.03499	-0.671718	0.501763	NA
WBGene00010801	18108	M01B2.8	0.991528	2.03814	4.10428	-0.49659	0.619478	NA
WBGene00017227	22225	F07G6.8	1.2457	2.03791	4.13663	-0.49265	0.62226	NA
WBGene00018946	355	F56C3.9	1077.89	2.03789	0.226316	-9.00461	2.16424e-19	2.05661e-17
WBGene00001722	11008	grl-13	1.27893	2.03712	4.25696	-0.478539	0.632266	NA
WBGene00021517	9882	Y41D4B.15	48.3943	2.03676	0.513306	-3.96794	7.2498e-05	0.00100726
WBGene00019485	2884	K07D4.5	7.08521	2.03628	1.21174	-1.68046	0.0928677	0.271916
WBGene00019688	13275	K12H6.8	1.39188	2.03602	4.44391	-0.45816	0.646837	NA
WBGene00005698	19991	sru-35	0.805972	2.0359	4.46603	-0.455864	0.648488	NA
WBGene00022005	13837	Y59H11AM.1	0.761975	2.0354	4.56292	-0.446074	0.655544	NA
WBGene00021889	9382	Y54G2A.24	10.0333	2.03493	0.947646	-2.14735	0.0317651	0.137708
WBGene00006017	18537	srx-126	0.726201	2.03475	4.69573	-0.43332	0.664782	NA
WBGene00194748	25011	F56F3.7	0.630253	2.03457	4.7363	-0.42957	0.667509	NA
WBGene00086556	969	F36D1.12	0.5946	2.03452	4.74759	-0.428538	0.66826	NA
WBGene00016497	23738	vps-32.2	0.67306	2.03438	4.77978	-0.425621	0.670384	NA
WBGene00020128	1880	R193.2	10569	2.03432	0.442231	-4.60013	4.22232e-06	7.91462e-05
WBGene00196261	12418	E02A10.6	0.676751	2.03431	4.79572	-0.424192	0.671425	NA
WBGene00048010	16186	21ur-2671	0.879918	2.0338	4.91929	-0.413433	0.679289	NA
WBGene00012905	3255	Y46G5A.14	22.5106	2.03369	0.885264	-2.29727	0.0216033	0.105755
WBGene00219395	5980	M199.134	0.914122	2.03356	4.98047	-0.408306	0.683049	NA
WBGene00002285	26475	let-7	1.00087	2.0333	5.04669	-0.402899	0.687023	NA
WBGene00014189	13717	nhr-245	0.989382	2.03319	5.07797	-0.400395	0.688866	NA
WBGene00005490	26685	srh-286	0.917068	2.03302	5.12689	-0.396541	0.691706	NA
WBGene00009613	7141	F41D3.8	0.859014	2.03301	5.1304	-0.396267	0.691908	NA
WBGene00018192	21717	F39B3.3	0.810325	2.03293	5.15125	-0.394648	0.693102	NA
WBGene00005473	13547	srh-267	0.90135	2.03264	5.23933	-0.387957	0.698048	NA
WBGene00006019	20000	srx-128	0.84235	2.03255	5.26716	-0.385891	0.699578	NA
WBGene00011005	19114	R04B5.7	0.806009	2.03244	5.3001	-0.383473	0.701369	NA
WBGene00022209	19790	Y73B3A.7	0.674039	2.03243	5.30344	-0.383229	0.70155	NA
WBGene00005059	9576	sra-33	21.0932	2.03203	0.71986	-2.82281	0.0047604	0.0344712
WBGene00017873	19722	F28A10.5	8.22354	2.03181	1.47127	-1.38099	0.167282	0.386152
WBGene00255441	18958	T11G6.11	0.682528	2.03177	5.52744	-0.367579	0.713188	NA
WBGene00012799	17144	Y43F4A.4	0.621148	2.03165	5.56896	-0.364817	0.715248	NA
WBGene00005334	23066	srh-115	1.01416	2.03161	5.58668	-0.363652	0.716118	NA
WBGene00005504	23113	srh-300	0.648956	2.03158	5.59431	-0.363152	0.716492	NA
WBGene00198433	13922	C34H3.13	0.623058	2.03158	5.59595	-0.363045	0.716571	NA
WBGene00219586	17942	linc-108	0.5685	2.03137	5.67708	-0.35782	0.720478	NA
WBGene00196875	15416	Y104H12D.5	0.524041	2.03134	4.81125	-0.422208	0.672874	NA
WBGene00005320	19525	srh-101	1.0021	2.03099	5.82928	-0.348412	0.727531	NA
WBGene00020174	18784	T02H6.4	0.547021	2.03098	5.83684	-0.347958	0.727872	NA
WBGene00021957	16149	Y57E12AL.2	0.572302	2.03095	5.84689	-0.347356	0.728324	NA
WBGene00206509	21941	Y102A5C.43	0.511569	2.03084	5.89823	-0.344313	0.730611	NA
WBGene00206533	20437	C30A5.16	2.81207	2.03079	2.29275	-0.885745	0.375755	NA
WBGene00018022	27804	ceh-87	0.877198	2.03076	5.93144	-0.342372	0.732071	NA
WBGene00018938	19253	F56C3.1	0.512767	2.03071	5.95543	-0.340984	0.733116	NA
WBGene00016467	10267	C36B7.4	0.953585	2.03063	5.99114	-0.338938	0.734656	NA
WBGene00199166	25767	K08F8.11	0.230678	2.03052	6.04108	-0.336119	0.736781	NA
WBGene00048256	30968	21ur-1194	0.229244	2.03052	6.04108	-0.336119	0.736781	NA
WBGene00198229	20360	C43C3.8	0.229244	2.03052	6.04108	-0.336119	0.736781	NA
WBGene00201585	20893	T05G5.16	0.190216	2.03052	6.04108	-0.336119	0.736781	NA
WBGene00197831	43775	M01G5.10	0.272581	2.03052	6.04108	-0.336119	0.736781	NA
WBGene00200667	16396	F56A12.9	0.272581	2.03052	6.04108	-0.336119	0.736781	NA
WBGene00000676	18478	col-102	0.286559	2.03052	6.04108	-0.336119	0.736781	NA
WBGene00005913	23205	srx-22	0.286559	2.03052	6.04108	-0.336119	0.736781	NA
WBGene00017694	27800	F22B7.3	0.286559	2.03052	6.04108	-0.336119	0.736781	NA
WBGene00200010	25934	C30B5.14	0.305797	2.03052	6.04108	-0.336119	0.736781	NA
WBGene00003537	22495	nas-18	0.336555	2.03052	6.04108	-0.336119	0.736781	NA
WBGene00219412	26418	ZK381.62	0.336555	2.03052	6.04108	-0.336119	0.736781	NA
WBGene00022407	14811	srsx-4	0.542993	2.03052	6.04108	-0.336119	0.736781	NA
WBGene00044286	15847	ugt-35	0.432221	2.03052	6.04108	-0.336119	0.736781	NA
WBGene00018535	16689	F47B7.4	0.449309	2.03052	6.04108	-0.336119	0.736781	NA
WBGene00200446	45240	Y51H7C.31	0.531623	2.03052	6.04108	-0.336119	0.736781	NA
WBGene00196756	43161	C36F7.9	0.160926	2.03052	6.04108	-0.336119	0.736781	NA
WBGene00202262	46279	T12C9.10	0.160926	2.03052	6.04108	-0.336119	0.736781	NA
WBGene00005939	23208	srx-48	0.160209	2.03052	6.04108	-0.336119	0.736781	NA
WBGene00189957	21861	M03F8.7	0.140695	2.03052	6.04108	-0.336119	0.736781	NA
WBGene00196012	42749	F32A6.7	0.140695	2.03052	6.04108	-0.336119	0.736781	NA
WBGene00005572	26706	sri-60	0.14002	2.03052	6.04108	-0.336119	0.736781	NA
WBGene00199436	10944	F46A8.12	0.14002	2.03052	6.04108	-0.336119	0.736781	NA
WBGene00202422	26365	K08B4.43	0.14002	2.03052	6.04108	-0.336119	0.736781	NA
WBGene00005529	23118	sri-17	0.151643	2.03052	6.04108	-0.336119	0.736781	NA
WBGene00047237	24246	21ur-1040	0.151643	2.03052	6.04108	-0.336119	0.736781	NA
WBGene00170619	38422	21ur-9389	0.151643	2.03052	6.04108	-0.336119	0.736781	NA
WBGene00173839	24935	21ur-13908	0.151643	2.03052	6.04108	-0.336119	0.736781	NA
WBGene00219671	15948	anr-4	0.154567	2.03052	6.04108	-0.336119	0.736781	NA
WBGene00017523	27788	F16G10.8	0.14483	2.03052	6.04108	-0.336119	0.736781	NA
WBGene00049295	31899	21ur-2777	0.14483	2.03052	6.04108	-0.336119	0.736781	NA
WBGene00197768	43737	W03G11.12	0.14483	2.03052	6.04108	-0.336119	0.736781	NA
WBGene00199587	44752	E01G6.5	0.14483	2.03052	6.04108	-0.336119	0.736781	NA
WBGene00009612	13113	F41D3.7	0.155946	2.03052	6.04108	-0.336119	0.736781	NA
WBGene00174494	14885	21ur-6555	0.155946	2.03052	6.04108	-0.336119	0.736781	NA
WBGene00195270	25043	T23F11.7	0.155946	2.03052	6.04108	-0.336119	0.736781	NA
WBGene00235153	20945	Y7A5A.23	0.155946	2.03052	6.04108	-0.336119	0.736781	NA
WBGene00199147	20382	F44E7.14	0.185778	2.03052	6.04108	-0.336119	0.736781	NA
WBGene00201393	45774	C36F7.23	0.185778	2.03052	6.04108	-0.336119	0.736781	NA
WBGene00170566	14872	21ur-6763	0.194351	2.03052	6.04108	-0.336119	0.736781	NA
WBGene00006186	20006	str-139	0.22498	2.03052	6.04108	-0.336119	0.736781	NA
WBGene00046459	29363	21ur-5280	0.204792	2.03052	6.04108	-0.336119	0.736781	NA
WBGene00200782	45438	C39B10.11	0.239062	2.03052	6.04108	-0.336119	0.736781	NA
WBGene00022962	28001	C48C5.t1	0.238387	2.03052	6.04108	-0.336119	0.736781	NA
WBGene00008828	23337	F14H3.9	0.574927	2.03052	6.04108	-0.336119	0.736781	NA
WBGene00005377	26650	srh-161	0.370182	2.03052	6.04108	-0.336119	0.736781	NA
WBGene00195875	14402	F11C7.8	0.370182	2.03052	6.04108	-0.336119	0.736781	NA
WBGene00005143	23025	srd-66	0.367313	2.03052	6.04108	-0.336119	0.736781	NA
WBGene00013616	27278	fbxa-148	0.367313	2.03052	6.04108	-0.336119	0.736781	NA
WBGene00015446	20081	srab-1	0.735042	2.03052	6.04108	-0.336119	0.736781	NA
WBGene00195381	42408	C53D6.17	0.308475	2.03052	6.04108	-0.336119	0.736781	NA
WBGene00044639	16767	C24H12.12	0.383559	2.03052	6.04108	-0.336119	0.736781	NA
WBGene00006102	23236	str-37	0.422234	2.03052	6.04108	-0.336119	0.736781	NA
WBGene00005338	26640	srh-119	0.391421	2.03052	6.04108	-0.336119	0.736781	NA
WBGene00020539	7355	T16D1.1	0.486786	2.03052	6.04108	-0.336119	0.736781	NA
WBGene00198767	25689	F26F12.15	0.466227	2.03052	6.04108	-0.336119	0.736781	NA
WBGene00005082	20478	srd-4	1.11498	2.03052	6.04108	-0.336119	0.736781	NA
WBGene00017956	23794	F31E8.6	0.714496	2.03052	6.04108	-0.336119	0.736781	NA
WBGene00005447	23103	srh-240	0.606588	2.03052	6.04108	-0.336119	0.736781	NA
WBGene00200381	26003	F02E8.9	0.773281	2.03052	6.04108	-0.336119	0.736781	NA
WBGene00202150	46209	F33C8.9	0.631282	2.03052	6.04108	-0.336119	0.736781	NA
WBGene00043058	24036	sre-34	0.559366	2.03052	6.04108	-0.336119	0.736781	NA
WBGene00018530	19733	F47B3.6	0.70428	2.03052	6.04108	-0.336119	0.736781	NA
WBGene00173836	41231	21ur-11773	0.137849	2.03052	6.04108	-0.336119	0.736781	NA
WBGene00198476	44128	T18H9.9	0.137849	2.03052	6.04108	-0.336119	0.736781	NA
WBGene00198752	20375	F54D12.17	0.137849	2.03052	6.04108	-0.336119	0.736781	NA
WBGene00202440	46375	C32A3.7	0.137849	2.03052	6.04108	-0.336119	0.736781	NA
WBGene00174821	42101	21ur-5956	0.186695	2.03052	6.04108	-0.336119	0.736781	NA
WBGene00006259	27008	str-228	0.191505	2.03052	6.04108	-0.336119	0.736781	NA
WBGene00045936	24164	21ur-5171	0.258787	2.03052	6.04108	-0.336119	0.736781	NA
WBGene00011358	23471	lgc-16	0.335932	2.03052	6.04108	-0.336119	0.736781	NA
WBGene00199238	21904	W05B10.8	0.225592	2.03052	6.04108	-0.336119	0.736781	NA
WBGene00220260	26902	Y105C5B.1420	0.274438	2.03052	6.04108	-0.336119	0.736781	NA
WBGene00014506	27485	T06D8.11	0.336308	2.03052	6.04108	-0.336119	0.736781	NA
WBGene00197105	20337	C18H9.9	0.678993	2.03052	6.04108	-0.336119	0.736781	NA
WBGene00005135	19976	srd-58	0.0911741	2.03052	6.04108	-0.336119	0.736781	NA
WBGene00005485	21013	srh-280	0.0911741	2.03052	6.04108	-0.336119	0.736781	NA
WBGene00005486	19527	srh-281	0.0911741	2.03052	6.04108	-0.336119	0.736781	NA
WBGene00005928	26807	srx-37	0.0911741	2.03052	6.04108	-0.336119	0.736781	NA
WBGene00006095	26956	str-29	0.0911741	2.03052	6.04108	-0.336119	0.736781	NA
WBGene00006131	26969	str-69	0.0911741	2.03052	6.04108	-0.336119	0.736781	NA
WBGene00007442	27044	C08E8.6	0.0911741	2.03052	6.04108	-0.336119	0.736781	NA
WBGene00008060	27065	C41G6.16	0.0911741	2.03052	6.04108	-0.336119	0.736781	NA
WBGene00010022	27127	srbc-50	0.0911741	2.03052	6.04108	-0.336119	0.736781	NA
WBGene00010292	23389	F59A1.6	0.0911741	2.03052	6.04108	-0.336119	0.736781	NA
WBGene00012072	16066	T26H8.4	0.0911741	2.03052	6.04108	-0.336119	0.736781	NA
WBGene00013117	27262	Y51H4A.23	0.0911741	2.03052	6.04108	-0.336119	0.736781	NA
WBGene00013661	27287	Y105C5B.23	0.0911741	2.03052	6.04108	-0.336119	0.736781	NA
WBGene00014527	27500	T22A3.t3	0.0911741	2.03052	6.04108	-0.336119	0.736781	NA
WBGene00014602	27554	Y73F8A.t1	0.0911741	2.03052	6.04108	-0.336119	0.736781	NA
WBGene00014658	27592	B0399.t15	0.0911741	2.03052	6.04108	-0.336119	0.736781	NA
WBGene00014768	27626	F49H6.6	0.0911741	2.03052	6.04108	-0.336119	0.736781	NA
WBGene00015374	23689	C03B1.3	0.0911741	2.03052	6.04108	-0.336119	0.736781	NA
WBGene00015594	19684	btb-15	0.0911741	2.03052	6.04108	-0.336119	0.736781	NA
WBGene00017476	23773	F15A8.1	0.0911741	2.03052	6.04108	-0.336119	0.736781	NA
WBGene00018882	27834	F55E10.2	0.0911741	2.03052	6.04108	-0.336119	0.736781	NA
WBGene00020406	14298	T10D4.1	0.0911741	2.03052	6.04108	-0.336119	0.736781	NA
WBGene00020515	27886	T14G12.6	0.0911741	2.03052	6.04108	-0.336119	0.736781	NA
WBGene00022217	27939	fbxa-221	0.0911741	2.03052	6.04108	-0.336119	0.736781	NA
WBGene00022948	27993	C28G1.t2	0.0911741	2.03052	6.04108	-0.336119	0.736781	NA
WBGene00023142	28126	T20F5.1	0.0911741	2.03052	6.04108	-0.336119	0.736781	NA
WBGene00023382	24026	Y57E12AL.3	0.0911741	2.03052	6.04108	-0.336119	0.736781	NA
WBGene00044245	16764	F32A7.8	0.0911741	2.03052	6.04108	-0.336119	0.736781	NA
WBGene00044581	28339	Y81B9A.4	0.0911741	2.03052	6.04108	-0.336119	0.736781	NA
WBGene00045046	24105	Y64G10A.9	0.0911741	2.03052	6.04108	-0.336119	0.736781	NA
WBGene00045097	9424	VY10G11R.2	0.0911741	2.03052	6.04108	-0.336119	0.736781	NA
WBGene00045105	28422	Y7A9C.11	0.0911741	2.03052	6.04108	-0.336119	0.736781	NA
WBGene00045651	28640	21ur-1325	0.0911741	2.03052	6.04108	-0.336119	0.736781	NA
WBGene00047012	16183	21ur-5364	0.0911741	2.03052	6.04108	-0.336119	0.736781	NA
WBGene00047060	24233	21ur-4182	0.0911741	2.03052	6.04108	-0.336119	0.736781	NA
WBGene00047848	24275	21ur-3416	0.0911741	2.03052	6.04108	-0.336119	0.736781	NA
WBGene00047892	30647	21ur-2120	0.0911741	2.03052	6.04108	-0.336119	0.736781	NA
WBGene00048651	31316	21ur-5439	0.0911741	2.03052	6.04108	-0.336119	0.736781	NA
WBGene00048980	31611	21ur-2321	0.0911741	2.03052	6.04108	-0.336119	0.736781	NA
WBGene00049878	32426	21ur-3207	0.0911741	2.03052	6.04108	-0.336119	0.736781	NA
WBGene00050290	24397	21ur-2665	0.0911741	2.03052	6.04108	-0.336119	0.736781	NA
WBGene00050839	33296	21ur-339	0.0911741	2.03052	6.04108	-0.336119	0.736781	NA
WBGene00166539	34795	21ur-14792	0.0911741	2.03052	6.04108	-0.336119	0.736781	NA
WBGene00167148	35343	21ur-5684	0.0911741	2.03052	6.04108	-0.336119	0.736781	NA
WBGene00167774	35917	21ur-10358	0.0911741	2.03052	6.04108	-0.336119	0.736781	NA
WBGene00168357	36446	21ur-7632	0.0911741	2.03052	6.04108	-0.336119	0.736781	NA
WBGene00170297	38143	21ur-9461	0.0911741	2.03052	6.04108	-0.336119	0.736781	NA
WBGene00171807	39472	21ur-6127	0.0911741	2.03052	6.04108	-0.336119	0.736781	NA
WBGene00171939	39581	21ur-7023	0.0911741	2.03052	6.04108	-0.336119	0.736781	NA
WBGene00171973	39614	21ur-10788	0.0911741	2.03052	6.04108	-0.336119	0.736781	NA
WBGene00172433	40009	21ur-7087	0.0911741	2.03052	6.04108	-0.336119	0.736781	NA
WBGene00172562	40117	21ur-7965	0.0911741	2.03052	6.04108	-0.336119	0.736781	NA
WBGene00172873	40383	21ur-7582	0.0911741	2.03052	6.04108	-0.336119	0.736781	NA
WBGene00173145	40629	21ur-5729	0.0911741	2.03052	6.04108	-0.336119	0.736781	NA
WBGene00174143	16266	21ur-6685	0.0911741	2.03052	6.04108	-0.336119	0.736781	NA
WBGene00174441	41769	21ur-8112	0.0911741	2.03052	6.04108	-0.336119	0.736781	NA
WBGene00174981	20731	21ur-14016	0.0911741	2.03052	6.04108	-0.336119	0.736781	NA
WBGene00195461	42440	F28E10.7	0.0911741	2.03052	6.04108	-0.336119	0.736781	NA
WBGene00195834	42646	H13N06.8	0.0911741	2.03052	6.04108	-0.336119	0.736781	NA
WBGene00195958	42720	ZK867.7	0.0911741	2.03052	6.04108	-0.336119	0.736781	NA
WBGene00196250	42879	ZC13.12	0.0911741	2.03052	6.04108	-0.336119	0.736781	NA
WBGene00196262	25234	T01B4.5	0.0911741	2.03052	6.04108	-0.336119	0.736781	NA
WBGene00196455	16308	C34F6.15	0.0911741	2.03052	6.04108	-0.336119	0.736781	NA
WBGene00196472	25280	H08J11.4	0.0911741	2.03052	6.04108	-0.336119	0.736781	NA
WBGene00196494	43014	C07A12.9	0.0911741	2.03052	6.04108	-0.336119	0.736781	NA
WBGene00196617	43089	C50H2.15	0.0911741	2.03052	6.04108	-0.336119	0.736781	NA
WBGene00196802	20770	C36F7.10	0.0911741	2.03052	6.04108	-0.336119	0.736781	NA
WBGene00197002	979	F33D4.12	0.0911741	2.03052	6.04108	-0.336119	0.736781	NA
WBGene00197192	43398	F10E9.14	0.0911741	2.03052	6.04108	-0.336119	0.736781	NA
WBGene00197303	43453	F26E4.16	0.0911741	2.03052	6.04108	-0.336119	0.736781	NA
WBGene00197382	20345	K08B12.8	0.0911741	2.03052	6.04108	-0.336119	0.736781	NA
WBGene00198463	44122	C27F2.13	0.0911741	2.03052	6.04108	-0.336119	0.736781	NA
WBGene00198596	25660	F42C5.14	0.0911741	2.03052	6.04108	-0.336119	0.736781	NA
WBGene00198920	44377	C13G3.10	0.0911741	2.03052	6.04108	-0.336119	0.736781	NA
WBGene00199159	25765	W06A7.9	0.0911741	2.03052	6.04108	-0.336119	0.736781	NA
WBGene00199214	20822	W07E11.5	0.0911741	2.03052	6.04108	-0.336119	0.736781	NA
WBGene00199290	25787	ZK377.9	0.0911741	2.03052	6.04108	-0.336119	0.736781	NA
WBGene00199291	44582	R02D5.15	0.0911741	2.03052	6.04108	-0.336119	0.736781	NA
WBGene00199440	25822	F38E9.8	0.0911741	2.03052	6.04108	-0.336119	0.736781	NA
WBGene00200116	45058	R90.11	0.0911741	2.03052	6.04108	-0.336119	0.736781	NA
WBGene00200840	26087	R13H8.4	0.0911741	2.03052	6.04108	-0.336119	0.736781	NA
WBGene00201054	26133	C29A12.19	0.0911741	2.03052	6.04108	-0.336119	0.736781	NA
WBGene00201058	45591	C06H2.10	0.0911741	2.03052	6.04108	-0.336119	0.736781	NA
WBGene00201221	45678	T25D10.8	0.0911741	2.03052	6.04108	-0.336119	0.736781	NA
WBGene00201227	45682	C11H1.11	0.0911741	2.03052	6.04108	-0.336119	0.736781	NA
WBGene00201848	46047	R11E3.16	0.0911741	2.03052	6.04108	-0.336119	0.736781	NA
WBGene00201868	46056	W01A11.19	0.0911741	2.03052	6.04108	-0.336119	0.736781	NA
WBGene00201985	46120	Y65A5A.27	0.0911741	2.03052	6.04108	-0.336119	0.736781	NA
WBGene00202149	46208	F10E9.22	0.0911741	2.03052	6.04108	-0.336119	0.736781	NA
WBGene00235081	46744	W06G6.21	0.0911741	2.03052	6.04108	-0.336119	0.736781	NA
WBGene00005122	26599	srd-44	0.188866	2.03052	6.04108	-0.336119	0.736781	NA
WBGene00012541	27242	irld-55	0.188866	2.03052	6.04108	-0.336119	0.736781	NA
WBGene00012631	11180	Y38H6C.19	0.188866	2.03052	6.04108	-0.336119	0.736781	NA
WBGene00016047	27735	srt-26	0.188866	2.03052	6.04108	-0.336119	0.736781	NA
WBGene00196967	20334	F14B8.10	0.188866	2.03052	6.04108	-0.336119	0.736781	NA
WBGene00198634	25666	T09F3.6	0.188866	2.03052	6.04108	-0.336119	0.736781	NA
WBGene00202245	46267	K10D6.25	0.188866	2.03052	6.04108	-0.336119	0.736781	NA
WBGene00013565	23559	Y75B8A.37	0.212112	2.03052	6.04108	-0.336119	0.736781	NA
WBGene00018884	27836	F55E10.5	0.212112	2.03052	6.04108	-0.336119	0.736781	NA
WBGene00021409	27920	Y38C1AB.7	0.217959	2.03052	6.04108	-0.336119	0.736781	NA
WBGene00197229	43420	F52F12.11	0.217959	2.03052	6.04108	-0.336119	0.736781	NA
WBGene00202241	46265	F54B11.14	0.217959	2.03052	6.04108	-0.336119	0.736781	NA
WBGene00017896	23790	F28C10.1	0.198485	2.03052	6.04108	-0.336119	0.736781	NA
WBGene00047139	20182	21ur-647	0.198485	2.03052	6.04108	-0.336119	0.736781	NA
WBGene00174133	41493	21ur-14453	0.198485	2.03052	6.04108	-0.336119	0.736781	NA
WBGene00008753	23332	F13E9.4	0.220717	2.03052	6.04108	-0.336119	0.736781	NA
WBGene00020232	23877	T05A8.6	0.220717	2.03052	6.04108	-0.336119	0.736781	NA
WBGene00198316	25617	K08E5.12	0.220717	2.03052	6.04108	-0.336119	0.736781	NA
WBGene00200963	45538	C01B12.10	0.220717	2.03052	6.04108	-0.336119	0.736781	NA
WBGene00005693	17540	sru-30	0.289359	2.03052	6.04108	-0.336119	0.736781	NA
WBGene00202096	46183	Y66A7AL.9	0.289359	2.03052	6.04108	-0.336119	0.736781	NA
WBGene00219642	7976	anr-52	0.242522	2.03052	6.04108	-0.336119	0.736781	NA
WBGene00006271	27014	str-244	0.556522	2.03052	6.04108	-0.336119	0.736781	NA
WBGene00018534	23817	F47B7.3	0.403489	2.03052	6.04108	-0.336119	0.736781	NA
WBGene00195180	25035	C41D11.10	0.677886	2.03052	6.04108	-0.336119	0.736781	NA
WBGene00005051	23006	sra-25	0.319424	2.03052	6.04108	-0.336119	0.736781	NA
WBGene00011565	15638	nhr-272	0.319424	2.03052	6.04108	-0.336119	0.736781	NA
WBGene00201256	20881	K03H9.14	0.319424	2.03052	6.04108	-0.336119	0.736781	NA
WBGene00206383	26387	kvs-2	0.347502	2.03052	6.04108	-0.336119	0.736781	NA
WBGene00206471	20436	Y22F5A.11	0.396671	2.03052	6.04108	-0.336119	0.736781	NA
WBGene00199003	25733	F42G9.10	0.485386	2.03052	6.04108	-0.336119	0.736781	NA
WBGene00011714	14643	T11F9.13	0.705353	2.03052	6.04108	-0.336119	0.736781	NA
WBGene00019136	23840	F59H6.5	0.526214	2.03052	6.04108	-0.336119	0.736781	NA
WBGene00008193	19581	C49C3.3	0.184524	2.03052	6.04108	-0.336119	0.736781	NA
WBGene00023375	14823	Y53G8B.t3	0.184524	2.03052	6.04108	-0.336119	0.736781	NA
WBGene00173226	40703	21ur-7952	0.184524	2.03052	6.04108	-0.336119	0.736781	NA
WBGene00195416	25071	C25F6.9	0.184524	2.03052	6.04108	-0.336119	0.736781	NA
WBGene00196328	15906	Y39G8C.6	0.184524	2.03052	6.04108	-0.336119	0.736781	NA
WBGene00006137	23244	str-77	0.379909	2.03052	6.04108	-0.336119	0.736781	NA
WBGene00006173	23255	str-122	0.524093	2.03052	6.04108	-0.336119	0.736781	NA
WBGene00195210	21331	Y7A5A.13	0.577992	2.03052	6.04108	-0.336119	0.736781	NA
WBGene00200433	26012	K03H4.6	0.435961	2.03052	6.04108	-0.336119	0.736781	NA
WBGene00023340	16749	T05B11.5	0.562941	2.03052	6.04108	-0.336119	0.736781	NA
WBGene00044130	28309	C05B5.10	0.2312	2.03052	6.04108	-0.336119	0.736781	NA
WBGene00199687	16375	C50E10.13	0.357984	2.03052	6.04108	-0.336119	0.736781	NA
WBGene00010129	18622	F55G11.10	0.457703	2.03052	6.04108	-0.336119	0.736781	NA
WBGene00202484	26380	C45B2.19	0.277875	2.03052	6.04108	-0.336119	0.736781	NA
WBGene00009570	23357	srz-65	0.385186	2.03052	6.04108	-0.336119	0.736781	NA
WBGene00005605	21016	srj-17	0.571231	2.03052	6.04108	-0.336119	0.736781	NA
WBGene00235319	991	F44E7.17	0.648655	2.03052	6.04108	-0.336119	0.736781	NA
WBGene00005820	18028	srw-73	0.515071	2.03052	6.04108	-0.336119	0.736781	NA
WBGene00197256	16856	F35C8.10	0.426135	2.03052	6.04108	-0.336119	0.736781	NA
WBGene00008906	19079	oac-17	0.454938	2.03052	6.04108	-0.336119	0.736781	NA
WBGene00005573	26707	sri-61	0.516604	2.03052	6.04108	-0.336119	0.736781	NA
WBGene00014796	27634	K03D7.3	0.536961	2.03052	6.04108	-0.336119	0.736781	NA
WBGene00048337	21821	21ur-852	0.501516	2.03052	6.04108	-0.336119	0.736781	NA
WBGene00012454	23518	clec-256	0.371225	2.03052	6.04108	-0.336119	0.736781	NA
WBGene00005639	23141	srm-2	0.59846	2.03052	6.04108	-0.336119	0.736781	NA
WBGene00016597	15702	clec-179	0.540773	2.03052	6.04108	-0.336119	0.736781	NA
WBGene00005593	19989	srj-5	0.262318	2.03052	6.04108	-0.336118	0.736782	NA
WBGene00001818	15975	haf-8	0.391861	2.03052	6.04108	-0.336118	0.736782	NA
WBGene00014903	23664	Y49E10.8	0.451527	2.03052	6.04108	-0.336118	0.736782	NA
WBGene00195718	25131	W06B11.5	0.516168	2.03052	6.04108	-0.336118	0.736782	NA
WBGene00200552	20859	C03A3.6	0.516168	2.03052	6.04108	-0.336118	0.736782	NA
WBGene00014170	5258	ZK945.8	3.56377	2.03001	2.07485	-0.978389	0.327882	0.565328
WBGene00015377	12216	C03B1.6	8.16292	2.0299	0.885061	-2.29352	0.0218181	0.106396
WBGene00017305	5318	nspb-12	14.6247	2.02979	1.17891	-1.72174	0.085116	0.258378
WBGene00014135	1274	ZK896.4	1129.58	2.02921	0.292251	-6.94336	3.82876e-12	1.70948e-10
WBGene00009485	12604	F36G9.3	401.227	2.02638	0.202587	-10.0025	1.48554e-23	2.09508e-21
WBGene00011799	1215	T16G1.5	1133.11	2.02594	0.261337	-7.7522	9.03163e-15	5.33196e-13
WBGene00009049	166	F22B8.7	2281.64	2.02135	0.128737	-15.7014	1.47866e-55	9.38422e-53
WBGene00009985	15114	F53F4.1	4.13499	2.02031	1.93887	-1.04201	0.297409	0.536325
WBGene00014886	12699	Y41E3.5	5.82147	2.0198	1.09942	-1.83715	0.0661878	0.222319
WBGene00013417	13186	srab-24	3.39627	2.01969	1.54666	-1.30584	0.191608	0.420718
WBGene00008632	3644	fbxa-88	14.2246	2.01965	1.06629	-1.89409	0.0582127	0.205305
WBGene00008553	156	F07C6.2	111.181	2.0177	0.393569	-5.12667	2.94915e-07	6.73603e-06
WBGene00268197	493	Y40B10A.11	1.8269	2.0175	2.37912	-0.848003	0.396436	NA
WBGene00022892	12862	ZK1290.11	2.42301	2.01701	2.32689	-0.866827	0.386037	NA
WBGene00009268	7652	F30A10.11	18.4263	2.01677	0.785568	-2.56727	0.0102502	0.06182
WBGene00001500	5017	ftn-1	303.763	2.01585	0.295181	-6.82922	8.53805e-12	3.65593e-10
WBGene00006678	1108	twk-25	255.296	2.01489	0.219473	-9.18056	4.28872e-20	4.30568e-18
WBGene00012711	13690	Y39E4A.1	8.67879	2.01462	1.16681	-1.7266	0.0842393	0.257014
WBGene00194982	22887	Y17D7B.10	8.63355	2.01387	0.888068	-2.26769	0.0233478	0.11177
WBGene00077782	4963	T26H10.2	3.8227	2.01174	1.88701	-1.0661	0.28638	0.524984
WBGene00005428	23100	srh-218	2.07299	2.01108	3.01052	-0.668019	0.504122	NA
WBGene00189943	25003	Y116F11B.17	1.55335	2.00926	2.3296	-0.862491	0.388417	NA
WBGene00012159	6224	VY10G11R.1	3.9229	2.00855	1.68996	-1.18852	0.234629	0.471191
WBGene00009428	13623	F35E12.4	597.735	2.00803	0.20814	-9.6475	5.03699e-22	6.13063e-20
WBGene00016190	4306	C28G1.5	1119.3	2.00788	0.197462	-10.1684	2.74314e-24	4.09626e-22
WBGene00018133	2356	F37A4.3	12.3689	2.00665	0.989657	-2.02763	0.0425984	0.168254
WBGene00015720	21143	C13A2.3	3.66417	2.00592	1.73175	-1.15832	0.246734	0.4849
WBGene00007482	8106	C09F12.2	52.1477	2.00465	0.518873	-3.86346	0.000111793	0.0014759
WBGene00012278	12166	W05B10.3	11.711	2.00365	0.892535	-2.2449	0.0247746	0.116282
WBGene00012173	15648	W01B6.6	39.8084	2.00139	0.435864	-4.59178	4.39487e-06	8.22939e-05
WBGene00170860	14874	21ur-10466	0.925052	1.99931	3.79153	-0.527309	0.597979	NA
WBGene00013843	5244	fbxa-49	7.29621	1.99906	1.33416	-1.49837	0.134038	0.339431
WBGene00011130	22624	zip-6	4.5056	1.99747	2.04134	-0.978508	0.327823	0.565328
WBGene00014149	17660	fbxb-70	10.1488	1.9964	1.39972	-1.42629	0.153785	0.367131
WBGene00044510	22844	K07H8.11	18.0249	1.99596	0.732291	-2.72564	0.0064176	0.0436938
WBGene00018662	23823	math-30	3.23237	1.99499	1.87094	-1.0663	0.286288	0.524984
WBGene00044280	13863	W02A2.9	813.149	1.99481	0.369749	-5.39504	6.85071e-08	1.7391e-06
WBGene00017483	2840	lgc-22	1078.77	1.99422	0.143279	-13.9184	4.89663e-44	1.77578e-41
WBGene00007358	19051	lact-6	252.969	1.99176	0.547882	-3.63539	0.000277565	0.0032773
WBGene00007141	12567	pitr-4	20.6555	1.99064	0.7317	-2.72056	0.00651708	0.0442862
WBGene00219911	26846	F21F12.3	0.359865	1.99057	5.97804	-0.332981	0.739149	NA
WBGene00195245	25042	T26A8.6	0.408711	1.99056	5.97804	-0.332979	0.73915	NA
WBGene00194864	6947	Y66A7A.9	8.05744	1.98887	1.23274	-1.61338	0.106662	0.294909
WBGene00219452	13956	F21D9.11	8.9447	1.98835	1.12506	-1.76732	0.0771748	0.244325
WBGene00016164	3785	C27D9.2	21.3722	1.98757	0.717118	-2.77161	0.00557802	0.0390857
WBGene00016761	13750	tkr-2	10.0169	1.98718	0.879151	-2.26034	0.0238	0.113294
WBGene00044759	10884	T06E6.15	15.9381	1.98466	0.847403	-2.34206	0.0191778	0.0968281
WBGene00014180	5259	ZK1010.6	1.44208	1.98432	3.39429	-0.584604	0.558814	NA
WBGene00015434	2808	C04E12.4	742.851	1.98322	0.148343	-13.3692	9.1534e-41	2.95738e-38
WBGene00045412	456	C25F9.12	25.7697	1.98153	0.586363	-3.37936	0.000726556	0.00741453
WBGene00206411	26388	R13D11.11	1.941	1.98123	2.55549	-0.775283	0.438173	NA
WBGene00045458	11891	F17B5.8	62.6354	1.98062	0.593905	-3.3349	0.000853293	0.00848043
WBGene00008324	21552	C55A1.7	2.4729	1.97963	2.2452	-0.881718	0.377929	NA
WBGene00206461	14447	Y47D3A.34	5.37403	1.97751	1.45869	-1.35568	0.175201	0.397311
WBGene00194916	19379	F35D2.6	3.51219	1.97746	1.89278	-1.04474	0.296143	0.53513
WBGene00016136	23720	C26B9.7	6.71655	1.97639	1.60649	-1.23026	0.218601	0.452164
WBGene00195213	20741	F11C1.9	5.65896	1.97581	1.27459	-1.55015	0.121106	0.319982
WBGene00019849	18776	oac-40	3.39168	1.97347	1.90725	-1.03472	0.300801	0.539324
WBGene00017340	15722	F10D7.3	655.39	1.97326	0.206931	-9.5358	1.48728e-21	1.76193e-19
WBGene00016338	13224	srb-14	11.8553	1.97155	1.13883	-1.7312	0.0834166	0.255431
WBGene00044474	4949	F56D6.12	12.1906	1.96953	1.02676	-1.91819	0.0550865	0.198517
WBGene00020639	14788	fbxa-71	129.393	1.96911	0.361629	-5.44512	5.17707e-08	1.34106e-06
WBGene00007245	23288	C01G12.5	2.85606	1.96828	1.90164	-1.03504	0.300648	NA
WBGene00015085	4282	B0244.10	316.951	1.96412	0.192372	-10.21	1.78784e-24	2.73878e-22
WBGene00021865	17789	fbxa-66	29.9245	1.96363	0.588487	-3.33674	0.000847663	0.00843391
WBGene00006049	11060	ssp-32	4.5479	1.96359	1.9841	-0.98966	0.32234	0.560169
WBGene00016869	8776	C52B9.10	2.00437	1.96252	2.04422	-0.960033	0.337039	NA
WBGene00018120	9819	F36H12.4	14.475	1.96189	1.00136	-1.95923	0.050086	0.18702
WBGene00018148	22254	F37C4.8	10.856	1.9579	1.00941	-1.93964	0.0524234	0.19303
WBGene00009943	5651	F52G2.3	641.596	1.95696	0.170292	-11.4918	1.45046e-30	3.10538e-28
WBGene00219330	21947	F18E2.15	1.80317	1.95635	2.51685	-0.777298	0.436983	NA
WBGene00020579	390	T19D12.4	9236.94	1.95446	0.293444	-6.66041	2.73066e-11	1.11293e-09
WBGene00015847	7783	C16C8.9	2.15625	1.95433	2.74562	-0.711798	0.47659	NA
WBGene00018601	9829	F48C1.9	3.96649	1.9513	2.17875	-0.895605	0.370464	0.603888
WBGene00016941	10750	C55B6.5	2.12519	1.94952	1.82402	-1.0688	0.28516	NA
WBGene00000729	14478	col-156	98.6312	1.94847	0.697199	-2.79471	0.00519467	0.0370125
WBGene00019721	11805	M01H9.5	7.69463	1.9475	1.45068	-1.34248	0.179442	0.404141
WBGene00006627	9599	tsp-1	493.079	1.94708	0.394574	-4.93465	8.02954e-07	1.72742e-05
WBGene00235288	15961	Y69A2AR.46	0.853425	1.94671	4.81284	-0.404481	0.685859	NA
WBGene00005336	18021	srh-117	0.988874	1.94578	5.51283	-0.352954	0.724123	NA
WBGene00010343	18102	F59F5.4	1.2748	1.94484	4.00481	-0.485628	0.627231	NA
WBGene00235181	26906	F35E12.13	36.8108	1.94481	0.521028	-3.73265	0.000189476	0.00235125
WBGene00044357	17308	nspc-6	11.0753	1.94398	1.1022	-1.76373	0.0777769	0.245459
WBGene00020129	19761	R193.3	1.74479	1.94388	3.27029	-0.594406	0.552241	NA
WBGene00077599	15368	T20F5.8	5.65924	1.94381	1.33309	-1.45812	0.144807	0.354683
WBGene00023517	15343	srz-75	1.49155	1.94333	2.94519	-0.659832	0.509362	NA
WBGene00019393	15769	irld-45	3.18864	1.94224	2.29481	-0.846363	0.39735	0.62747
WBGene00044047	9912	Y57A10C.11	13.635	1.94224	0.881299	-2.20383	0.0275361	0.125049
WBGene00171708	39382	21ur-14121	1.2736	1.94034	2.58284	-0.751244	0.452506	NA
WBGene00022547	17288	ZC196.3	20.1166	1.93941	0.868206	-2.23382	0.0254952	0.118537
WBGene00007424	12572	C08B6.3	340.088	1.93914	0.227898	-8.50879	1.75751e-17	1.41317e-15
WBGene00019846	14768	gpx-7	200.395	1.93784	0.416696	-4.6505	3.31133e-06	6.30466e-05
WBGene00001727	11010	grl-18	21.1362	1.93773	0.631728	-3.06734	0.0021597	0.018313
WBGene00020455	892	fbxa-59	447.054	1.93651	0.243633	-7.94848	1.8881e-15	1.21563e-13
WBGene00016874	3310	C52B11.5	1175.83	1.93336	0.153146	-12.6243	1.55153e-36	4.51977e-34
WBGene00219247	46435	mir-4807	1.33843	1.93333	2.96227	-0.652652	0.513981	NA
WBGene00206381	8966	F52H2.15	4.79802	1.93315	1.68521	-1.14713	0.251328	0.48997
WBGene00009782	17096	F46C5.7	8.83885	1.93236	0.880498	-2.19462	0.0281908	0.127068
WBGene00021587	10845	clec-76	14.0631	1.93234	0.868	-2.2262	0.026001	0.12001
WBGene00219727	15950	linc-39	3.24026	1.93142	2.28075	-0.846837	0.397086	0.627331
WBGene00015401	7774	srsx-24	2.72044	1.93097	1.89346	-1.01981	0.30782	NA
WBGene00012257	259	lpr-4	87.9465	1.93068	0.413265	-4.67178	2.98606e-06	5.73027e-05
WBGene00007544	7617	fipr-6	9.73181	1.93016	1.12269	-1.71923	0.0855724	0.259315
WBGene00010937	22620	M163.5	3.46085	1.92943	1.94748	-0.99073	0.321817	0.559778
WBGene00020359	891	math-40	147.462	1.92747	0.280042	-6.88279	5.86928e-12	2.56258e-10
WBGene00019154	362	glf-1	125.922	1.92685	0.431717	-4.46322	8.07382e-06	0.000142616
WBGene00008493	152	F01D5.2	67.4633	1.92486	0.55758	-3.45217	0.00055609	0.00593854
WBGene00017433	2338	F13H6.5	93.8804	1.92432	0.476397	-4.03931	5.36079e-05	0.000771347
WBGene00009725	12115	F45E6.1	2.672	1.92351	2.20842	-0.870987	0.383761	NA
WBGene00023314	17814	H31G24.2	8.43147	1.92272	1.16409	-1.6517	0.098595	0.281641
WBGene00000694	8499	col-120	220.764	1.92164	0.403022	-4.76807	1.85998e-06	3.73468e-05
WBGene00012886	15170	Y45F10D.6	129.177	1.92142	0.279785	-6.86747	6.53494e-12	2.82545e-10
WBGene00195519	15408	Y73B3A.23	0.896472	1.92141	4.15372	-0.462576	0.643668	NA
WBGene00010692	8171	K08H2.5	11.2063	1.91854	1.14546	-1.67492	0.0939508	0.2736
WBGene00019152	9837	nspb-6	18.3206	1.91781	0.925835	-2.07144	0.0383181	0.156856
WBGene00012308	13681	oac-53	41.1593	1.91631	0.431298	-4.44312	8.86617e-06	0.000154766
WBGene00019213	363	H20E11.1	1304.02	1.91628	0.234859	-8.15929	3.3701e-16	2.35775e-14
WBGene00010422	7675	H32K16.2	187.391	1.91321	0.411089	-4.65401	3.2554e-06	6.20692e-05
WBGene00019978	12800	hacd-1	2410.09	1.91156	0.200918	-9.51413	1.83235e-21	2.14217e-19
WBGene00001804	5522	gur-3	3.08192	1.91101	2.21842	-0.86143	0.389001	NA
WBGene00012540	22128	Y37A1B.7	26.6624	1.91084	0.72354	-2.64096	0.00826716	0.0528254
WBGene00002118	5530	ins-35	6.71704	1.90939	1.68301	-1.13451	0.256581	0.495301
WBGene00077622	16213	T25E12.14	1.78338	1.90904	2.04776	-0.932261	0.351202	NA
WBGene00014183	3764	ZK1025.3	56.5515	1.90844	0.607899	-3.13939	0.00169297	0.0150798
WBGene00018920	16129	F56A4.12	7.89657	1.90684	1.17591	-1.62159	0.104891	0.292425
WBGene00010407	1183	H19N07.3	715.298	1.9058	0.135702	-14.044	8.38741e-45	3.24009e-42
WBGene00050891	24426	C08E8.9	0.734505	1.905	5.87617	-0.32419	0.745794	NA
WBGene00022331	5918	fbxa-19	186.074	1.90371	0.223685	-8.51069	1.72906e-17	1.39661e-15
WBGene00044011	3939	T06E4.12	54.1697	1.90367	0.505324	-3.76723	0.000165068	0.00208032
WBGene00000049	22459	acr-10	16.7397	1.9032	0.903496	-2.10649	0.0351622	0.148099
WBGene00044291	946	C25F9.10	182.531	1.90279	0.423596	-4.492	7.05584e-06	0.000126388
WBGene00009384	10130	piit-1	182.629	1.90267	0.347201	-5.48002	4.25269e-08	1.12289e-06
WBGene00018273	7323	F41C3.7	60.8999	1.90235	0.476527	-3.9921	6.54903e-05	0.000918518
WBGene00077681	15870	Y44A6D.7	5.13573	1.8998	1.41252	-1.34497	0.178634	0.402731
WBGene00011166	17124	chil-22	385.013	1.89925	0.3039	-6.24961	4.11479e-10	1.44221e-08
WBGene00008042	14090	C40H1.7	164.384	1.89815	0.597062	-3.17915	0.0014771	0.0134743
WBGene00001724	11009	grl-15	104.525	1.89808	0.530905	-3.57517	0.000349998	0.00399452
WBGene00011822	22118	T18D3.5	28.3882	1.89709	0.754024	-2.51595	0.0118711	0.0686014
WBGene00016998	4820	D1005.4	80.1708	1.89659	0.43538	-4.35618	1.32351e-05	0.000223563
WBGene00013337	5727	Y57G11C.48	11.4002	1.8963	1.07239	-1.76829	0.0770123	0.243984
WBGene00018874	855	tag-234	1321.54	1.89554	0.237288	-7.98837	1.36735e-15	8.93304e-14
WBGene00020881	18261	T28A11.19	193.278	1.89527	0.414268	-4.57498	4.76255e-06	8.85257e-05
WBGene00022411	3443	Y102A11A.1	72.9231	1.8952	0.404314	-4.68745	2.76632e-06	5.35604e-05
WBGene00012655	17141	Y39A1A.17	2.93913	1.8942	1.65183	-1.14673	0.251495	NA
WBGene00007894	22568	C33D3.3	25.35	1.8926	0.733192	-2.58131	0.00984253	0.059964
WBGene00194939	14395	C01B9.5	15.7094	1.89196	0.706613	-2.67751	0.00741726	0.0486543
WBGene00045488	18867	F57B1.9	201.018	1.89179	0.312267	-6.05824	1.37623e-09	4.51263e-08
WBGene00010257	12617	F58E6.8	53.7602	1.89135	0.491824	-3.84559	0.000120262	0.00156906
WBGene00220258	8476	C50C3.19	7.16734	1.89049	1.31463	-1.43804	0.150422	0.362089
WBGene00202501	8468	Y57E12B.10	3.09899	1.89038	2.33977	-0.807936	0.419128	NA
WBGene00011184	3218	R09H10.7	24.3297	1.88963	0.763223	-2.47586	0.0132914	0.074322
WBGene00006288	9589	str-262	10.7563	1.88897	1.03698	-1.82161	0.0685148	0.227317
WBGene00235113	9474	ZK105.12	44.6617	1.8873	0.436256	-4.32614	1.51747e-05	0.000251309
WBGene00022552	17289	ZC196.9	1.95298	1.88435	1.86503	-1.01036	0.312324	NA
WBGene00015837	17188	math-8	3.02883	1.88308	1.57621	-1.19469	0.232208	NA
WBGene00008591	11615	F08H9.3	48.4572	1.87886	0.574238	-3.27192	0.0010682	0.0102494
WBGene00012680	263	Y39B6A.21	1464.54	1.8779	0.214134	-8.76978	1.7902e-18	1.61482e-16
WBGene00020173	11817	T02H6.3	3.10875	1.87716	2.72971	-0.687677	0.491656	NA
WBGene00045393	2964	F26D11.13	11.1067	1.87528	0.980174	-1.91321	0.0557208	0.200032
WBGene00013046	22146	Y50E8A.1	183.34	1.8743	0.411978	-4.54951	5.3772e-06	9.88138e-05
WBGene00048915	16195	21ur-4809	0.6072	1.8722	5.61806	-0.333247	0.738948	NA
WBGene00001246	4025	elo-8	41.2807	1.87204	0.482418	-3.88054	0.000104226	0.00138838
WBGene00044232	9412	C18D11.7	40.1788	1.87121	0.513455	-3.64436	0.000268061	0.00318199
WBGene00012822	22139	Y43F8B.12	41.781	1.87069	0.463485	-4.03614	5.43367e-05	0.000780569
WBGene00077583	33401	C01G10.18	1.01356	1.86525	4.8448	-0.385	0.700238	NA
WBGene00000633	22471	col-56	0.679176	1.86345	5.87671	-0.31709	0.751175	NA
WBGene00045195	13361	F53F4.17	9.66651	1.86276	1.23968	-1.50261	0.13294	0.33796
WBGene00045338	959	M01B2.13	93.7955	1.86164	0.417136	-4.46292	8.08505e-06	0.000142673
WBGene00021226	27909	Y19D10A.11	7.4638	1.85747	1.21316	-1.5311	0.125745	0.327104
WBGene00017552	9304	nep-7	6.8882	1.8544	1.24535	-1.48906	0.136471	0.343059
WBGene00003707	18000	nhr-117	360.344	1.85166	0.179921	-10.2915	7.69612e-25	1.18922e-22
WBGene00006533	100	tba-7	696.789	1.8505	0.195168	-9.4816	2.50412e-21	2.79863e-19
WBGene00009501	10623	F37A8.1	15.9539	1.85032	0.764582	-2.42005	0.0155185	0.0832482
WBGene00008487	12091	F01D4.3	12.9368	1.84758	0.994903	-1.85704	0.0633055	0.216918
WBGene00077629	12892	K10G4.13	6.92781	1.84407	1.46601	-1.25788	0.208435	0.44004
WBGene00019369	15767	K03H6.4	4.50042	1.84389	1.59622	-1.15516	0.248026	0.486308
WBGene00009410	8647	F35E2.2	4.06983	1.84384	1.63817	-1.12555	0.260357	0.499303
WBGene00019945	5375	R08C7.1	9.55978	1.84294	0.987616	-1.86605	0.0620346	0.214466
WBGene00020954	392	W02G9.4	1448.01	1.84209	0.26497	-6.95206	3.60002e-12	1.61546e-10
WBGene00015879	802	C17B7.5	190.089	1.84124	0.341844	-5.38619	7.19669e-08	1.82173e-06
WBGene00021872	416	clec-85	1629.32	1.84096	0.293144	-6.28006	3.38436e-10	1.2028e-08
WBGene00197623	43648	B0240.5	0.84749	1.8395	4.90326	-0.37516	0.707542	NA
WBGene00011796	13154	T16G1.2	27.7919	1.83574	0.528476	-3.47364	0.000513447	0.00556339
WBGene00005653	2092	srr-2	47.5486	1.83434	0.594766	-3.08415	0.00204137	0.0174736
WBGene00020619	1894	T20D4.13	22.7719	1.83282	0.552031	-3.32014	0.000899736	0.0088824
WBGene00044152	21787	W04G3.10	5.65099	1.83161	1.52485	-1.20117	0.229684	0.465603
WBGene00011841	23492	scl-25	2.49396	1.83098	1.99027	-0.919962	0.357593	NA
WBGene00017388	16677	F11G11.13	6.73835	1.82699	1.13484	-1.60992	0.107416	0.296118
WBGene00007452	8105	C08F11.3	38.1158	1.82648	0.534293	-3.4185	0.000629662	0.00659345
WBGene00044724	11384	R02E4.3	78.2477	1.82557	0.577247	-3.16255	0.00156396	0.0141217
WBGene00206532	17935	F11A6.15	22.4576	1.81805	0.753921	-2.41146	0.0158889	0.0847377
WBGene00020675	8863	T22B11.1	17.1036	1.81778	0.779888	-2.33082	0.0197628	0.0990871
WBGene00007057	10094	ant-1.2	5.88816	1.81536	1.5476	-1.17302	0.240788	0.478346
WBGene00011697	13669	T10H4.4	10.3445	1.81518	1.61297	-1.12537	0.260434	0.499337
WBGene00018127	12759	F36H12.14	17.1891	1.8149	1.03696	-1.75022	0.0800798	0.249521
WBGene00021031	17775	W04H10.2	10.1954	1.8147	1.08646	-1.67028	0.0948638	0.274942
WBGene00007326	22555	C05C9.2	2.75232	1.81397	2.38707	-0.759916	0.447305	NA
WBGene00021708	27932	srbc-37	1.48622	1.8122	3.30111	-0.548967	0.583028	NA
WBGene00012449	13685	nhr-231	143.781	1.81213	0.345969	-5.23783	1.62474e-07	3.87019e-06
WBGene00019933	12303	R07C12.3	3.80226	1.8115	1.69898	-1.06623	0.286322	0.524984
WBGene00077525	464	C41G7.8	520.007	1.81089	0.260906	-6.94076	3.89995e-12	1.7369e-10
WBGene00044397	24072	nspc-8	7.45296	1.8108	1.05102	-1.7229	0.0849072	0.258135
WBGene00010387	10638	H12D21.11	2.71969	1.80831	2.88498	-0.626801	0.530789	NA
WBGene00016579	11751	sre-14	8.40592	1.80764	1.16223	-1.55532	0.119871	0.318068
WBGene00001691	3032	grd-2	40.2737	1.80651	0.473678	-3.81379	0.00013685	0.00174825
WBGene00022651	11362	ZK84.4	3.44377	1.80536	1.44418	-1.25009	0.211266	0.443278
WBGene00007873	11094	dod-21	8.74266	1.80499	1.47398	-1.22457	0.220738	0.454258
WBGene00005887	21517	srw-140	2.5775	1.80366	2.54763	-0.707978	0.478959	NA
WBGene00021650	15818	Y47G6A.26	43.6669	1.80328	0.62408	-2.88951	0.00385841	0.0291019
WBGene00015442	19191	C04F1.1	35.7949	1.80093	0.515102	-3.49626	0.000471826	0.00519798
WBGene00022541	16740	ZC190.7	6.55327	1.79939	1.42057	-1.26667	0.205274	0.436872
[truncated: 9,908 more rows]

## Sheet: Downregulated genes
Table S2. Genes down-regulated in sgk-1(lf) compared to wild type following CS.
gene_id	entrezid	symbol	baseMean	log2FoldChange	lfcSE	stat	pvalue	padj
WBGene00002091	26472	ins-8	12.577	-8.29309	3.52093	2.35536	0.0185045	0.0942733
WBGene00021601	10847	Y46H3A.5	1435.6	-7.68754	0.302689	25.3975	2.68767e-142	4.77599e-138
WBGene00220143	46683	Y38E10A.32	4.55799	-7.20372	2.48416	2.89987	0.00373321	0.0283899
WBGene00201301	17419	C10F3.15	5.33899	-7.17138	2.16027	3.31966	0.000901259	0.00889249
WBGene00016484	17198	C36C5.15	4.73449	-6.65464	2.43404	2.73399	0.00625711	0.0428143
WBGene00003608	21486	nhr-9	2.73615	-6.35397	2.74424	2.31538	0.0205921	NA
WBGene00175028	24995	nspe-8	58.5581	-6.32739	0.785744	8.05274	8.09633e-16	5.38846e-14
WBGene00012593	15164	nspe-7	1804.23	-6.29748	0.766109	8.22009	2.03345e-16	1.46293e-14
WBGene00219674	22439	linc-122	1.66216	-6.1229	4.45462	1.3745	0.169285	NA
WBGene00005896	21024	srx-5	1.53731	-6.02118	3.90031	1.54377	0.122645	NA
WBGene00020244	12311	T05B4.13	1.61661	-6.01214	4.0582	1.48148	0.138479	NA
WBGene00018248	21182	F40G9.14	4.86296	-5.90268	1.85685	3.17887	0.00147849	0.0134802
WBGene00044074	15348	mltn-5	3.69353	-5.84261	1.91102	3.05733	0.00223318	0.0187896
WBGene00044542	18315	CD4.11	1.99834	-5.83682	3.15343	1.85094	0.064178	NA
WBGene00021591	20126	Y46D2A.3	3.44939	-5.64348	2.8139	2.00557	0.0449021	0.17354
WBGene00018404	19240	nhr-39	1.8863	-5.59925	3.22458	1.73643	0.0824885	NA
WBGene00022256	9392	Y73B6BL.37	3.0392	-5.57525	2.90309	1.92045	0.0548008	NA
WBGene00006130	19023	str-68	3.59718	-5.57522	2.83645	1.96556	0.0493494	0.184969
WBGene00219310	21946	C17E4.19	3.12482	-5.57464	2.07121	2.69149	0.00711345	NA
WBGene00206363	8965	F56H1.10	2.51961	-5.56347	2.33954	2.37802	0.0174058	NA
WBGene00197327	43470	F48C5.7	1.3809	-5.55072	4.10723	1.35145	0.176551	NA
WBGene00021285	18809	Y24D9A.7	2.13658	-5.47178	2.62152	2.08726	0.036865	NA
WBGene00005622	23138	srj-38	0.862992	-5.38968	5.96241	0.903943	0.366025	NA
WBGene00006134	20490	str-73	1.04636	-5.38968	5.96241	0.903943	0.366025	NA
WBGene00006210	21035	str-165	1.93045	-5.38899	3.78931	1.42216	0.154981	NA
WBGene00195410	22400	C39B5.15	1.48523	-5.36781	3.23121	1.66124	0.0966661	NA
WBGene00019567	20597	K09D9.9	1.5276	-5.34688	3.13665	1.70464	0.0882607	NA
WBGene00199370	44626	F25B4.14	1.17112	-5.33964	5.00218	1.06746	0.285763	NA
WBGene00000860	6507	cwp-2	2.29098	-5.33273	3.33217	1.60038	0.109515	NA
WBGene00015985	21152	C18G1.7	1.28819	-5.33264	3.60539	1.47907	0.139121	NA
WBGene00005807	14538	srw-60	1.68552	-5.31796	4.25853	1.24878	0.211746	NA
WBGene00012456	14165	Y17D7C.2	4.47174	-5.31712	1.81948	2.92232	0.00347431	0.0269483
WBGene00200809	16398	T04C12.28	2.09863	-5.31225	2.70238	1.96577	0.0493253	NA
WBGene00005898	18031	srx-7	1.30353	-5.30341	4.04189	1.31211	0.189483	NA
WBGene00012088	23506	T27E7.3	3.49943	-5.2244	1.97422	2.64632	0.00813738	0.0522026
WBGene00077646	21830	Y51A2A.14	0.993536	-5.21739	5.56774	0.937076	0.34872	NA
WBGene00200046	12435	Y47G6A.34	1.337	-5.21	2.91725	1.78593	0.0741107	NA
WBGene00235159	46753	CD4.17	0.714844	-5.20146	5.96438	0.872087	0.383161	NA
WBGene00000213	6	asm-3	1745.91	-5.14217	0.300065	17.1368	7.88077e-66	7.37059e-63
WBGene00011855	17617	clec-183	2.46317	-5.10776	2.61053	1.95659	0.0503951	NA
WBGene00077758	24464	irld-12	0.940951	-5.09247	5.65755	0.900119	0.368057	NA
WBGene00017562	20575	F18C5.9	2.21598	-5.09221	3.33955	1.52482	0.127305	NA
WBGene00200584	19415	B0334.19	1.65948	-5.08382	2.85893	1.77823	0.0753668	NA
WBGene00194785	18375	C52E4.12	3.13809	-5.07578	2.54394	1.99524	0.0460167	NA
WBGene00195425	16831	ZC8.7	1.91033	-5.06699	3.31097	1.53037	0.125926	NA
WBGene00005685	12549	sru-22	52.9481	-5.06477	0.639008	7.92598	2.26352e-15	1.44168e-13
WBGene00019159	18759	H05C05.3	2.99195	-5.06102	2.18652	2.31465	0.0206322	NA
WBGene00017221	22224	dgn-3	2.2446	-5.06056	2.27854	2.22097	0.0263531	NA
WBGene00023454	20151	mir-357	1.74953	-5.05928	2.71086	1.8663	0.0619989	NA
WBGene00019926	23863	fbxc-27	2.16301	-5.0587	3.09684	1.63351	0.102362	NA
WBGene00050363	20667	21ur-1333	0.769526	-5.05757	5.96607	0.847722	0.396593	NA
WBGene00010526	17117	K03B8.11	3.46923	-5.04511	2.25799	2.23434	0.0254609	0.118471
WBGene00012067	23502	sqst-3	3.32969	-4.97209	2.88124	1.72568	0.0844055	0.257182
WBGene00000642	22962	col-66	1.45673	-4.96449	3.94432	1.25864	0.208159	NA
WBGene00219980	46599	F56D1.17	2.13957	-4.96222	2.53468	1.95773	0.0502618	NA
WBGene00021484	22801	Y40A1A.2	6.22976	-4.94979	1.92096	2.57673	0.00997404	0.0606417
WBGene00006419	23277	oac-39	1.50382	-4.9364	3.09539	1.59476	0.110766	NA
WBGene00015342	16655	C02E7.10	1598.11	-4.92881	1.54365	3.19296	0.00140822	0.012919
WBGene00013356	23553	Y59A8B.24	1.19251	-4.91748	4.58213	1.07319	0.283187	NA
WBGene00199897	20841	R13H4.11	0.703963	-4.91731	5.96788	0.823963	0.409961	NA
WBGene00197286	25427	C42D8.13	1.12131	-4.90804	4.02688	1.21882	0.222912	NA
WBGene00001532	8513	gcy-5	90.3531	-4.8056	0.49078	9.79177	1.22144e-22	1.5843e-20
WBGene00017960	16682	F31F4.11	0.951405	-4.80452	5.96947	0.804847	0.420908	NA
WBGene00202335	11452	K11G9.14	0.56292	-4.80452	5.96947	0.804847	0.420908	NA
WBGene00020773	23892	T24E12.3	1.51735	-4.8039	4.33858	1.10725	0.268185	NA
WBGene00005868	19997	srw-121	2.40253	-4.80111	2.6878	1.78626	0.0740573	NA
WBGene00171177	12403	21ur-13616	0.696875	-4.79397	5.96963	0.803061	0.42194	NA
WBGene00007721	9111	C25D7.12	9.88135	-4.78862	1.40622	3.40532	0.000660872	0.00684654
WBGene00174231	19856	21ur-10524	0.873447	-4.78336	5.96979	0.801261	0.42298	NA
WBGene00198292	25611	T14F9.14	0.541706	-4.78336	5.96979	0.801261	0.422981	NA
WBGene00015840	14216	math-11	1.22917	-4.78312	4.57122	1.04636	0.295397	NA
WBGene00202168	8959	F43C9.9	0.96513	-4.78297	4.10371	1.16552	0.243807	NA
WBGene00022616	23960	hsd-3	1.65242	-4.78237	3.20619	1.49161	0.135802	NA
WBGene00021233	2414	Y19D10B.4	26.472	-4.78134	2.58498	1.84966	0.0643621	0.218561
WBGene00219740	19935	linc-117	2.77297	-4.78103	2.47717	1.93004	0.0536022	NA
WBGene00011357	1709	T01H10.4	2.25389	-4.78022	2.2681	2.10759	0.0350666	NA
WBGene00045371	28505	M163.15	0.92008	-4.77265	5.73446	0.832275	0.405254	NA
WBGene00048157	24291	21ur-1796	1.23192	-4.77226	3.40474	1.40165	0.161019	NA
WBGene00009838	11132	fbxa-187	40.0217	-4.76844	1.61297	2.95632	0.00311338	0.0246579
WBGene00046397	29308	21ur-1460	1.11431	-4.76191	3.69455	1.2889	0.197433	NA
WBGene00196743	15414	K10C3.9	1.32743	-4.76189	3.18384	1.49564	0.134747	NA
WBGene00017172	14721	F02C9.1	3.35669	-4.76168	2.02116	2.35591	0.0184775	0.0942165
WBGene00219937	26853	F37F2.4	0.81712	-4.75116	4.8366	0.982336	0.325934	NA
WBGene00197539	43599	C07H6.13	0.630906	-4.75104	5.97027	0.795784	0.426158	NA
WBGene00044088	11372	oac-2	4.18578	-4.74414	2.09561	2.26384	0.0235839	0.112536
WBGene00020899	17772	T28D9.11	2.91189	-4.74278	2.36365	2.00655	0.0447975	NA
WBGene00016075	14221	C24H12.6	2.85486	-4.7426	2.4167	1.96243	0.0497128	NA
WBGene00005452	14050	srh-246	2.34401	-4.74241	2.47806	1.91376	0.055651	NA
WBGene00006076	16522	str-8	1.38108	-4.7413	3.07755	1.54061	0.123413	NA
WBGene00006631	14550	tsp-5	2.44866	-4.74124	3.11986	1.5197	0.128588	NA
WBGene00020535	20119	T16A1.4	1.18637	-4.74066	3.91941	1.20953	0.226458	NA
WBGene00044265	14349	Y105E8B.11	1.15694	-4.74044	4.45448	1.0642	0.287239	NA
WBGene00005344	23070	srh-127	1.02314	-4.7404	4.55741	1.04015	0.298269	NA
WBGene00005359	23077	srh-142	0.856548	-4.74031	4.95381	0.956901	0.338617	NA
WBGene00167883	24618	21ur-12323	0.480189	-4.74012	5.97044	0.793932	0.427235	NA
WBGene00016253	21154	C30E1.4	0.664934	-4.74012	5.97044	0.793931	0.427235	NA
WBGene00045075	24109	W04G5.12	0.944951	-4.72921	5.53302	0.854725	0.392703	NA
WBGene00005104	19519	srd-26	2.38481	-4.71979	3.39977	1.38827	0.165056	NA
WBGene00005126	18527	srd-48	1.40918	-4.71919	3.84395	1.22769	0.219563	NA
WBGene00005827	9584	srw-80	0.661794	-4.71802	5.97078	0.790185	0.42942	NA
WBGene00197222	25415	F29G9.10	0.472769	-4.71802	5.97078	0.790185	0.42942	NA
WBGene00012604	6710	nspe-2	285.712	-4.69624	0.443148	10.5975	3.06189e-26	5.18188e-24
WBGene00013602	15661	Y87G2A.16	352.821	-4.6875	0.261847	17.9017	1.14463e-71	1.35601e-68
WBGene00012590	23525	nspe-3	17.2006	-4.66196	4.9073	0.950006	0.342109	0.578814
WBGene00022827	18296	ZK816.4	2.08851	-4.60889	2.94676	1.56405	0.117805	NA
WBGene00198826	25697	F43G9.16	1.58941	-4.59743	2.85709	1.60913	0.107588	NA
WBGene00046446	20649	21ur-4004	0.432224	-4.58763	5.9729	0.768073	0.442444	NA
WBGene00006126	13560	str-63	1.46181	-4.58702	3.66855	1.25036	0.211166	NA
WBGene00198182	19899	F56F3.11	0.930162	-4.575	3.07631	1.48717	0.13697	NA
WBGene00045123	28435	W01D2.7	0.573366	-4.56308	5.97333	0.763909	0.444922	NA
WBGene00047436	21271	21ur-936	1.78133	-4.55356	2.26826	2.00751	0.0446953	NA
WBGene00219554	13957	W03D2.11	2.73031	-4.55343	2.29809	1.9814	0.0475468	NA
WBGene00014633	19180	ZK897.4	1.57828	-4.54044	2.89406	1.56888	0.116675	NA
WBGene00005166	18528	srg-8	0.813753	-4.53812	5.97376	0.759675	0.447449	NA
WBGene00174448	20728	21ur-15343	0.543216	-4.52548	5.97399	0.75753	0.448732	NA
WBGene00045931	28883	21ur-4427	0.460348	-4.52547	5.97399	0.75753	0.448732	NA
WBGene00017312	5813	pitr-5	1281.42	-4.46333	0.208251	21.4324	6.65891e-102	2.36658e-98
WBGene00015409	18704	C03H5.7	12.6839	-4.41664	1.21931	3.62226	0.000292045	0.00342516
WBGene00198291	44028	Y51A2D.31	0.376838	-4.38927	5.97653	0.734418	0.462694	NA
WBGene00005236	21502	srh-10	0.497776	-4.38927	5.97653	0.734418	0.462694	NA
WBGene00016673	23747	ttbk-6	0.574921	-4.38927	5.97653	0.734418	0.462694	NA
WBGene00022640	23961	nhr-254	0.624561	-4.38927	5.97653	0.734418	0.462694	NA
WBGene00017006	23760	D1007.9	0.490456	-4.38927	5.97653	0.734418	0.462694	NA
WBGene00196937	21359	T01C1.8	0.551432	-4.38927	5.97653	0.734418	0.462694	NA
WBGene00023346	15339	T13B5.t1	0.975842	-4.38926	5.97652	0.734417	0.462695	NA
WBGene00201869	17424	ZC247.8	0.692425	-4.38905	5.33702	0.822379	0.410861	NA
WBGene00045099	24112	Y67A10A.13	0.758305	-4.38898	5.17087	0.848788	0.395999	NA
WBGene00009751	12609	F46A8.8	1.23029	-4.3887	4.68208	0.937339	0.348584	NA
WBGene00202110	16434	M01D7.10	1.48551	-4.38843	4.31872	1.01614	0.309563	NA
WBGene00005781	23170	srw-34	1.35597	-4.38779	3.76121	1.16659	0.243376	NA
WBGene00005370	23081	srh-154	1.201	-4.38732	3.4774	1.26167	0.207068	NA
WBGene00012413	13683	Y7A5A.7	2.12987	-4.38711	3.37378	1.30035	0.19348	NA
WBGene00020305	22776	T07D3.2	4.14296	-4.38167	2.28803	1.91504	0.0554876	0.199517
WBGene00199042	25743	H34C03.20	0.437899	-4.37527	5.9768	0.732041	0.464143	NA
WBGene00044100	24048	srbc-27	0.476729	-4.36113	5.97708	0.729642	0.465609	NA
WBGene00173168	24897	21ur-12110	1.19783	-4.36113	5.97708	0.729642	0.465609	NA
WBGene00185116	24998	W09C2.8	0.540562	-4.36112	5.97708	0.729641	0.465609	NA
WBGene00000026	22457	abu-3	1.07404	-4.36094	4.68242	0.931342	0.351677	NA
WBGene00220135	12956	Y18D10A.29	0.817111	-4.36081	4.22823	1.03136	0.302374	NA
WBGene00016476	13743	srab-10	1.26683	-4.36072	3.98597	1.09402	0.273947	NA
WBGene00202141	16923	R06B10.8	0.950845	-4.36072	3.97403	1.0973	0.272508	NA
WBGene00005843	12551	srw-96	1.28167	-4.36048	3.52518	1.23695	0.216105	NA
WBGene00268206	15463	F54E2.9	1.5517	-4.36045	3.47571	1.25455	0.209643	NA
WBGene00173198	20264	21ur-9574	1.24247	-4.36037	3.36615	1.29536	0.195197	NA
WBGene00018434	23809	ceh-81	1.22625	-4.36034	3.33779	1.30636	0.191431	NA
WBGene00014217	10230	ZK1086.3	1.93703	-4.36028	3.26399	1.33588	0.18159	NA
WBGene00014734	19182	F11A3.3	1.38011	-4.36011	3.09114	1.41052	0.158386	NA
WBGene00021911	18822	Y55B1BR.1	1.86358	-4.3599	2.92043	1.4929	0.135464	NA
WBGene00236785	17452	Y73B6A.16	2.07506	-4.35939	2.6218	1.66274	0.0963638	NA
WBGene00018385	10307	F43C11.8	3.52575	-4.35873	2.38057	1.83096	0.0671067	0.223983
WBGene00009817	18610	F47B10.6	1.94071	-4.35851	2.31806	1.88025	0.0600746	NA
WBGene00005659	23142	srr-8	2.80197	-4.35845	2.30212	1.89323	0.058327	NA
WBGene00012838	22649	Y43F8C.17	3.85338	-4.35725	2.07378	2.10111	0.0356312	0.149296
WBGene00007674	18564	C18D4.4	3.42725	-4.35651	1.97987	2.2004	0.0277783	0.125795
WBGene00009864	18615	F49B2.4	4.07442	-4.355	1.84839	2.3561	0.0184679	0.0941947
WBGene00023163	21237	W09G12.3	5.88387	-4.35369	1.7706	2.45888	0.0139373	0.0769445
WBGene00169583	37520	21ur-14673	13.1784	-4.3527	0.941195	4.62465	3.75224e-06	7.07827e-05
WBGene00173856	41247	21ur-11127	0.675294	-4.34687	5.21695	0.83322	0.40472	NA
WBGene00017170	23763	F01G12.1	0.699236	-4.34686	5.05092	0.860607	0.389454	NA
WBGene00196590	18902	B0035.19	0.609441	-4.34686	5.43213	0.800213	0.423587	NA
WBGene00219865	46543	C56G2.21	0.4634	-4.34686	5.97737	0.72722	0.467091	NA
WBGene00044285	443	thn-8	2.73459	-4.33563	2.11997	2.04514	0.0408414	NA
WBGene00020465	19282	T12E12.6	4.24772	-4.33507	2.24541	1.93064	0.0535279	0.195335
WBGene00017090	21164	E01A2.8	2.77537	-4.3348	2.32429	1.865	0.0621817	NA
WBGene00219651	10464	linc-130	2.09324	-4.33375	2.81963	1.53699	0.124295	NA
WBGene00010380	19103	mpst-2	1.40123	-4.33351	3.00892	1.44022	0.149805	NA
WBGene00014773	23649	F56D5.8	0.859885	-4.33278	4.27484	1.01355	0.310796	NA
WBGene00219222	16933	mir-4806	0.706505	-4.33259	5.06957	0.854627	0.392758	NA
WBGene00005862	26780	srw-115	0.707854	-4.33256	5.20923	0.831709	0.405573	NA
WBGene00171311	39030	21ur-11261	0.361997	-4.33245	5.97766	0.724774	0.468591	NA
WBGene00046590	24199	21ur-1663	0.694108	-4.33245	5.97766	0.724773	0.468591	NA
WBGene00166939	20227	21ur-15373	1.12329	-4.33072	4.32424	1.0015	0.316586	NA
WBGene00200754	45424	F45D3.12	1.52876	-4.32686	3.04765	1.41973	0.155685	NA
WBGene00174467	24961	21ur-10359	0.418756	-4.31791	5.97795	0.722305	0.470107	NA
WBGene00220054	20446	T01A4.8	0.458618	-4.3179	5.97795	0.722305	0.470107	NA
WBGene00194869	17885	K01A6.8	6.1079	-4.3091	2.51935	1.7104	0.0871914	0.262426
WBGene00008798	14595	F14D7.11	2.58304	-4.30787	2.71812	1.58487	0.112996	NA
WBGene00018726	14270	F53A9.3	1.49279	-4.30713	2.87451	1.49839	0.134032	NA
WBGene00020431	22779	irld-50	1.58651	-4.30621	3.13277	1.37457	0.169265	NA
WBGene00010531	14623	K03D3.5	2.34534	-4.30609	3.17368	1.35681	0.17484	NA
WBGene00008472	16560	E03H4.4	1.98269	-4.30554	3.396	1.26783	0.204859	NA
WBGene00269346	14463	R07C3.17	1.22848	-4.30465	3.90918	1.10117	0.270825	NA
WBGene00006153	20005	str-96	0.895142	-4.3042	4.29406	1.00236	0.316169	NA
WBGene00005339	23068	srh-120	1.14938	-4.30391	4.64346	0.926875	0.353991	NA
WBGene00045398	12885	Y71F9AM.8	0.967419	-4.30374	4.88214	0.881527	0.378033	NA
WBGene00196969	25365	R03E9.6	0.930085	-4.30367	4.98856	0.862706	0.388299	NA
WBGene00167465	35633	21ur-13657	0.408232	-4.30322	5.97826	0.719811	0.471641	NA
WBGene00023348	28235	T24E12.7	0.453669	-4.30322	5.97826	0.719811	0.471641	NA
WBGene00014694	19181	C33D3.2	0.617533	-4.30322	5.97826	0.719811	0.471641	NA
WBGene00005429	26661	srh-219	0.354577	-4.30322	5.97826	0.719811	0.471641	NA
WBGene00077611	33410	F11A5.19	0.354577	-4.30322	5.97826	0.719811	0.471641	NA
WBGene00195243	20280	F46B3.23	0.354577	-4.30322	5.97826	0.719811	0.471641	NA
WBGene00023488	16754	srz-84	0.492646	-4.30322	5.97826	0.719811	0.471641	NA
WBGene00011818	21095	srt-57	0.452269	-4.30322	5.97826	0.719811	0.471641	NA
WBGene00005536	19986	sri-24	0.481362	-4.30322	5.97826	0.719811	0.471641	NA
WBGene00195476	42446	F33D11.13	0.55266	-4.30322	5.97826	0.719811	0.471641	NA
WBGene00005565	26704	sri-53	0.582826	-4.30322	5.97826	0.719811	0.471641	NA
WBGene00195536	42479	C55A6.14	0.722665	-4.30322	5.97826	0.719811	0.471641	NA
WBGene00169319	14379	21ur-13902	0.863712	-4.30322	5.97826	0.719811	0.471641	NA
WBGene00013372	27267	Y61B8B.2	0.68026	-4.30322	5.97826	0.719811	0.471641	NA
WBGene00013648	2780	Y105C5B.7	32.2563	-4.27898	0.809026	5.28905	1.2295e-07	2.98882e-06
WBGene00005242	14527	srh-17	6.78955	-4.18572	1.5437	2.71149	0.00669819	0.0451372
WBGene00005228	6108	srh-2	44.3763	-4.18327	0.684691	6.10972	9.98047e-10	3.33998e-08
WBGene00044405	8424	C29F7.8	4.12437	-4.18074	4.72125	0.885514	0.37588	0.608212
WBGene00044521	10391	Y5H2A.4	5.37523	-4.17808	1.70112	2.45607	0.0140464	0.0773488
WBGene00012451	19145	Y17D7B.3	102.086	-4.15264	0.482309	8.60992	7.31104e-18	6.21613e-16
WBGene00171438	24790	21ur-7393	0.668158	-4.12607	5.98216	0.689729	0.490365	NA
WBGene00013909	27291	srbc-44	0.76416	-4.12607	5.98216	0.689728	0.490365	NA
WBGene00195700	15901	F13D12.11	0.629688	-4.12606	5.98216	0.689728	0.490365	NA
WBGene00197761	21892	C18A11.10	0.677426	-4.12579	5.32335	0.775037	0.438318	NA
WBGene00195006	11919	C35B1.9	0.896072	-4.12556	4.92198	0.838191	0.401924	NA
WBGene00020755	19290	grl-31	1.60561	-4.12346	3.36508	1.22537	0.220437	NA
WBGene00045133	28439	M163.13	0.310322	-4.10931	5.98256	0.686882	0.492157	NA
WBGene00196856	25344	R10E11.10	0.403672	-4.10931	5.98256	0.686882	0.492157	NA
WBGene00165222	33653	21ur-14927	0.51946	-4.10926	5.75973	0.713446	0.47557	NA
WBGene00201941	26278	C37E2.9	1.32578	-4.10825	3.79749	1.08183	0.279326	NA
WBGene00220243	17950	ZK484.11	2.09676	-4.10499	2.4728	1.66006	0.0969032	NA
WBGene00000136	16468	amt-4	2495.47	-4.09737	0.235959	17.3647	1.52647e-67	1.59561e-64
WBGene00047717	21817	21ur-1077	0.404978	-4.09237	5.98296	0.684004	0.493973	NA
WBGene00199273	44573	R12B2.10	0.735856	-4.09237	5.98296	0.684004	0.493973	NA
WBGene00197140	25407	F29D10.6	0.487705	-4.09235	5.75683	0.710868	0.477166	NA
WBGene00023387	19325	Y67D2.t3	1.09893	-4.09168	3.18141	1.28612	0.1984	NA
WBGene00199250	16365	C36F7.18	1.08178	-4.09167	3.18042	1.28652	0.198262	NA
WBGene00011992	21622	T24D5.4	1.52669	-4.09132	2.80427	1.45896	0.144577	NA
WBGene00008223	8620	lgc-48	2.21084	-4.0912	2.71014	1.50959	0.131149	NA
WBGene00199744	44841	R07B5.11	2.68706	-4.09112	2.66048	1.53774	0.124113	NA
WBGene00020545	18253	adbp-2	4.15684	-4.08987	2.15676	1.8963	0.0579203	0.204784
WBGene00018630	18748	F49D11.6	4.64559	-4.08879	1.95375	2.09279	0.036368	0.151349
WBGene00008519	18581	cyp-13B1	430.474	-4.08258	0.342418	11.9228	9.00137e-33	2.22159e-30
WBGene00198093	18909	F55A12.14	1.68628	-4.07606	2.86557	1.42242	0.154904	NA
WBGene00219652	14453	linc-65	0.302901	-4.07523	5.98337	0.681092	0.495813	NA
WBGene00220035	18947	M60.15	0.421457	-4.07523	5.98337	0.681092	0.495813	NA
WBGene00166160	34472	21ur-14161	0.403232	-4.07523	5.98337	0.681092	0.495813	NA
WBGene00045375	22372	C17D12.8	0.445772	-4.07523	5.98337	0.681092	0.495813	NA
WBGene00050910	9933	Y43F8B.17	1.86036	-4.06045	2.92254	1.38935	0.164725	NA
WBGene00049662	14853	21ur-795	0.762576	-4.05955	3.35956	1.20836	0.22691	NA
WBGene00199315	44593	T04C12.23	0.773934	-4.05901	3.78528	1.07231	0.283579	NA
WBGene00169578	13388	21ur-7740	1.203	-4.05901	3.78601	1.07211	0.283672	NA
WBGene00200756	10449	H01A20.4	0.767797	-4.05812	5.22042	0.777356	0.436949	NA
WBGene00199738	16376	C11G10.11	0.591446	-4.05801	5.56139	0.729676	0.465588	NA
WBGene00268199	26929	C45H4.21	0.490916	-4.0579	5.9838	0.678148	0.497678	NA
WBGene00047164	29992	21ur-5275	0.299191	-4.0579	5.9838	0.678148	0.497678	NA
WBGene00001959	11516	hlh-15	0.470335	-4.05789	5.9838	0.678147	0.497678	NA
WBGene00005594	10550	srj-6	5.06056	-4.04217	1.66981	2.42074	0.015489	0.0831626
WBGene00201273	20409	F46B6.15	0.863884	-4.04091	4.97304	0.812564	0.416468	NA
WBGene00220068	26873	T12D8.12	0.816728	-4.0408	5.1355	0.786837	0.431377	NA
WBGene00202301	46301	F35G2.21	0.349136	-4.04037	5.98423	0.675169	0.499568	NA
WBGene00236799	8980	F54E2.8	0.505968	-4.04037	5.98423	0.675169	0.499568	NA
WBGene00198932	20815	F29C4.11	0.622927	-4.04036	5.98423	0.675169	0.499569	NA
WBGene00018093	8805	F36F12.2	0.603119	-4.04036	5.98423	0.675168	0.499569	NA
WBGene00000308	19467	C04A11.t1	1.93137	-4.04017	3.08028	1.31163	0.189647	NA
WBGene00009689	15106	F44E5.2	12.6835	-4.0205	1.0797	3.72372	0.000196311	0.0024259
WBGene00018643	10309	drd-50	478.411	-4.00419	0.297287	13.4691	2.37791e-41	7.97272e-39
WBGene00001891	5027	his-17	4.21532	-3.98753	1.7786	2.24194	0.0249651	0.11696
WBGene00007439	14079	C08E8.3	307.439	-3.97211	0.231097	17.1881	3.25996e-66	3.2183e-63
WBGene00077605	33408	F36G9.17	1.975	-3.95065	2.93605	1.34557	0.178443	NA
WBGene00005002	2089	spp-17	9517.56	-3.93727	0.251275	15.6692	2.45805e-55	1.50619e-52
WBGene00045408	21265	F31E9.8	1.25992	-3.90561	4.59008	0.850882	0.394835	NA
WBGene00012594	9217	nspe-5	47.3295	-3.89628	0.862534	4.51725	6.26481e-06	0.000113598
WBGene00010182	14614	F57A8.7	8.87633	-3.89082	1.57242	2.47442	0.0133452	0.0744566
WBGene00196334	11932	F40F12.11	3.58533	-3.88551	1.84577	2.10509	0.0352838	0.148471
WBGene00268216	10976	F49B2.9	6.26698	-3.84254	1.58058	2.4311	0.0150531	0.081503
WBGene00005815	95	srw-68	3.52224	-3.83965	1.66988	2.29935	0.0214848	0.105204
WBGene00017498	12749	pud-4	896.194	-3.81743	0.172049	22.188	4.48606e-109	2.65724e-105
WBGene00018973	6368	srz-20	0.685155	-3.8039	5.99061	0.634977	0.525444	NA
WBGene00000014	26448	abf-3	0.251225	-3.80389	5.99061	0.634976	0.525444	NA
WBGene00004141	22991	pqn-57	0.251225	-3.80389	5.99061	0.634976	0.525444	NA
WBGene00043187	28289	nspa-9	0.251225	-3.80389	5.99061	0.634976	0.525444	NA
WBGene00048802	31450	21ur-2573	0.251225	-3.80389	5.99061	0.634976	0.525444	NA
WBGene00172426	40003	21ur-13190	0.251225	-3.80389	5.99061	0.634976	0.525444	NA
WBGene00198749	16356	F52D10.10	0.251225	-3.80389	5.99061	0.634976	0.525444	NA
WBGene00199134	44486	R09F10.17	0.251225	-3.80389	5.99061	0.634976	0.525444	NA
WBGene00201608	45901	Y50D7A.18	0.251225	-3.80389	5.99061	0.634976	0.525444	NA
WBGene00220071	26874	T15H9.8	0.251225	-3.80389	5.99061	0.634976	0.525444	NA
WBGene00255729	46807	R11G11.16	0.251225	-3.80389	5.99061	0.634976	0.525444	NA
WBGene00011356	27174	lgc-15	0.372164	-3.80389	5.99061	0.634976	0.525444	NA
WBGene00017845	20577	srsx-9	0.498948	-3.80389	5.99061	0.634976	0.525444	NA
WBGene00019053	23833	F58F6.5	0.465848	-3.80389	5.99061	0.634976	0.525444	NA
WBGene00005721	23154	srv-10	0.495456	-3.80389	5.99061	0.634976	0.525444	NA
WBGene00023247	20144	C33E10.7	0.561372	-3.80389	5.99061	0.634976	0.525444	NA
WBGene00005539	23119	sri-27	0.592143	-3.80389	5.99061	0.634976	0.525444	NA
WBGene00005458	20483	srh-252	0.637545	-3.80389	5.99061	0.634976	0.525444	NA
WBGene00202178	26327	F38A6.9	0.576093	-3.80389	5.99061	0.634976	0.525444	NA
WBGene00047751	24268	21ur-2767	0.367653	-3.80389	5.99061	0.634976	0.525444	NA
WBGene00014744	8738	F25H9.9	0.748574	-3.80389	5.99061	0.634976	0.525444	NA
WBGene00201678	20416	R13H8.5	0.336797	-3.80389	5.99061	0.634976	0.525444	NA
WBGene00199135	25763	E01G6.4	0.598145	-3.80389	5.99061	0.634975	0.525444	NA
WBGene00166862	24583	21ur-7559	0.830304	-3.80389	5.99061	0.634975	0.525444	NA
WBGene00167776	35919	21ur-11377	0.529681	-3.80389	5.99061	0.634975	0.525445	NA
WBGene00019851	23860	oac-41	0.593513	-3.80389	5.99061	0.634975	0.525445	NA
WBGene00012133	23508	T28F3.7	0.731583	-3.80389	5.99061	0.634975	0.525445	NA
WBGene00020982	15300	ilys-6	0.521341	-3.80382	5.83454	0.651949	0.514434	NA
WBGene00011902	21096	T21E8.4	1.06821	-3.80378	5.74645	0.661935	0.508013	NA
WBGene00171810	24808	21ur-6765	0.589643	-3.80375	5.68723	0.668822	0.503609	NA
WBGene00015771	27720	got-1.3	0.590176	-3.80373	5.65115	0.67309	0.50089	NA
WBGene00012614	23526	Y38H6A.3	0.758607	-3.80356	5.35509	0.71027	0.477537	NA
WBGene00014702	27608	C43D7.3	0.723842	-3.80352	5.29243	0.718673	0.472343	NA
WBGene00196681	25314	M03F4.10	0.778802	-3.80352	5.28221	0.720062	0.471487	NA
WBGene00019085	23836	F59A6.3	0.759819	-3.80351	5.27315	0.721296	0.470727	NA
WBGene00021724	27933	Y49F6C.2	0.774981	-3.80348	5.23657	0.726331	0.467636	NA
WBGene00005210	13545	srg-53	1.25238	-3.8032	4.86907	0.781094	0.434747	NA
WBGene00169565	24706	21ur-10180	0.992193	-3.80312	4.78568	0.794687	0.426795	NA
WBGene00003289	26502	mir-61	0.739027	-3.80286	4.5237	0.840653	0.400542	NA
WBGene00268215	12962	C49F5.13	0.770574	-3.80274	4.41675	0.860982	0.389248	NA
WBGene00005842	21516	srw-95	1.14611	-3.80265	4.35017	0.874137	0.382043	NA
WBGene00005118	15031	srd-40	1.04625	-3.80231	4.10423	0.926436	0.35422	NA
WBGene00201456	21422	Y65B4BR.10	1.14977	-3.80221	4.04208	0.940656	0.346881	NA
WBGene00268207	22951	W08F4.20	1.46882	-3.80217	4.01816	0.946247	0.344023	NA
WBGene00009214	19080	thn-3	1.1654	-3.80181	3.8239	0.994225	0.320113	NA
WBGene00021615	23930	Y47C4A.1	1.16572	-3.80148	3.66898	1.03611	0.300149	NA
WBGene00077495	33386	Y20C6A.4	1.69069	-3.80119	3.54921	1.07099	0.284172	NA
WBGene00022551	20132	ZC196.8	1.41249	-3.80034	3.26957	1.16234	0.245098	NA
WBGene00016692	21159	srbc-24	2.26824	-3.79927	3.01033	1.26208	0.206921	NA
WBGene00012400	9210	Y6E2A.7	2.56214	-3.79834	2.83727	1.33873	0.180659	NA
WBGene00020584	15286	T19D12.10	5.07746	-3.79595	2.52884	1.50106	0.133339	0.338636
WBGene00050889	11896	T04C12.9	1.83587	-3.79522	2.45838	1.54379	0.12264	NA
WBGene00009467	21071	F36D1.8	2.95128	-3.79436	2.3868	1.58973	0.111896	NA
WBGene00199670	19909	C10G11.14	1.16738	-3.7924	3.43622	1.10365	0.269743	NA
WBGene00044379	24071	F40H7.12	872.296	-3.78927	0.199017	19.0399	7.97284e-81	1.41677e-77
WBGene00219873	46550	EEED8.19	0.29419	-3.78303	5.99122	0.631429	0.52776	NA
WBGene00171780	24805	21ur-9703	0.601923	-3.78303	5.99122	0.631429	0.52776	NA
WBGene00168457	16234	21ur-11631	0.594846	-3.78292	5.54774	0.681886	0.495311	NA
WBGene00172577	40130	21ur-7128	0.773564	-3.78207	3.93559	0.96099	0.336557	NA
WBGene00196691	11430	M02D8.10	1.10379	-3.78187	3.75049	1.00837	0.313278	NA
WBGene00195623	11927	Y54G2A.58	1.19341	-3.78164	3.56043	1.06213	0.288175	NA
WBGene00020238	8852	T05B4.4	1.29834	-3.78066	3.02438	1.25006	0.211278	NA
WBGene00008071	20500	fbxb-64	1.76298	-3.77956	2.67811	1.41128	0.158162	NA
WBGene00010764	12136	K10H10.9	0.569747	-3.7619	5.4926	0.684902	0.493406	NA
WBGene00015066	23677	B0228.9	0.816555	-3.76189	4.96588	0.757549	0.448721	NA
WBGene00011686	27194	T10C6.2	0.243805	-3.76189	5.99186	0.627834	0.530112	NA
WBGene00015528	27708	C06E2.2	0.243805	-3.76189	5.99186	0.627834	0.530112	NA
WBGene00023249	28190	C35B1.t1	0.243805	-3.76189	5.99186	0.627834	0.530112	NA
WBGene00046036	28975	21ur-4419	0.243805	-3.76189	5.99186	0.627834	0.530112	NA
WBGene00172784	21318	21ur-7760	0.243805	-3.76189	5.99186	0.627834	0.530112	NA
WBGene00196306	42909	C54H2.6	0.243805	-3.76189	5.99186	0.627834	0.530112	NA
WBGene00006241	23265	str-208	0.502464	-3.76189	5.99186	0.627834	0.530112	NA
WBGene00044136	28310	F23D12.8	0.313557	-3.76189	5.99186	0.627834	0.530113	NA
WBGene00023300	20625	F56F11.t1	0.293326	-3.76189	5.99186	0.627834	0.530113	NA
WBGene00022637	27952	nhr-252	0.341497	-3.76189	5.99186	0.627834	0.530113	NA
WBGene00197360	25434	F46H6.8	0.353795	-3.76189	5.99186	0.627834	0.530113	NA
WBGene00167510	35675	21ur-12161	0.35793	-3.76189	5.99186	0.627834	0.530113	NA
WBGene00195817	16288	K10C3.7	0.488036	-3.76189	5.99186	0.627834	0.530113	NA
WBGene00017662	27796	F21D12.2	0.624159	-3.76189	5.99186	0.627834	0.530113	NA
WBGene00012633	22647	Y38H6C.21	0.610682	-3.76189	5.99186	0.627834	0.530113	NA
WBGene00017516	23778	F16G10.1	0.620505	-3.76189	5.99186	0.627834	0.530113	NA
WBGene00006021	23229	srx-130	0.549199	-3.76189	5.99186	0.627834	0.530113	NA
WBGene00013389	17647	Y62H9A.1	0.95249	-3.76189	4.74509	0.792796	0.427897	NA
WBGene00015065	20078	B0228.8	0.814614	-3.76189	5.05186	0.744654	0.456481	NA
WBGene00219798	10968	C04F12.17	0.49665	-3.76189	4.9096	0.766232	0.443538	NA
WBGene00198624	11942	F58G11.9	0.339326	-3.76189	5.99186	0.627834	0.530113	NA
WBGene00202343	26350	F39D8.7	0.623711	-3.76189	4.62352	0.813642	0.41585	NA
WBGene00169065	24672	21ur-6595	0.618539	-3.76189	4.59588	0.818535	0.413052	NA
WBGene00195459	20745	F27D4.9	0.639077	-3.76189	4.59078	0.819444	0.412533	NA
WBGene00005967	23215	srx-76	1.0067	-3.76189	4.92113	0.764437	0.444607	NA
WBGene00219936	26852	F37A8.7	0.5219	-3.76189	5.99186	0.627834	0.530113	NA
WBGene00195901	42683	H06I04.10	0.705764	-3.76189	5.99186	0.627834	0.530113	NA
WBGene00023499	28282	srz-63	0.414949	-3.76189	5.99186	0.627834	0.530113	NA
WBGene00006268	16528	str-240	0.710035	-3.76189	5.99185	0.627833	0.530113	NA
WBGene00013972	23580	scl-20	1.09813	-3.76189	4.38907	0.857103	0.391388	NA
WBGene00008327	17071	srz-44	0.989279	-3.76188	4.10718	0.915927	0.359705	NA
WBGene00010217	10145	sre-31	0.91948	-3.76188	4.12357	0.912286	0.361618	NA
WBGene00016821	12238	scl-26	1.21327	-3.76186	3.72138	1.01088	0.312076	NA
WBGene00023462	22833	srz-83	0.840594	-3.76185	3.67906	1.0225	0.306543	NA
WBGene00005197	20480	srg-40	1.42275	-3.76184	3.46275	1.08637	0.277314	NA
WBGene00018545	23426	nhr-189	1.48289	-3.76184	3.45472	1.0889	0.276198	NA
WBGene00017014	14239	dylt-2	2.12254	-3.7618	3.03493	1.2395	0.21516	NA
WBGene00005164	11560	srg-6	1.50371	-3.76178	2.93316	1.2825	0.199667	NA
WBGene00019625	11300	K10C9.4	2.62623	-3.76176	2.83675	1.32608	0.184813	NA
WBGene00219665	19934	linc-101	1.88636	-3.76167	2.46051	1.52882	0.12631	NA
WBGene00005331	15526	srh-112	2.69159	-3.76145	2.04143	1.84256	0.0653931	NA
WBGene00019527	19267	K08D9.6	6.70734	-3.76145	2.03204	1.85106	0.0641602	0.218373
WBGene00020793	21751	T25D1.1	5.81018	-3.7563	1.37189	2.73805	0.00618043	0.0424367
WBGene00197724	4472	F36H1.15	2.94795	-3.74626	2.23409	1.67686	0.09357	NA
WBGene00195485	12414	F55A12.11	0.528605	-3.74083	4.87489	0.767366	0.442864	NA
WBGene00201065	18927	C34D10.4	0.669295	-3.74045	5.99251	0.624188	0.532504	NA
WBGene00202218	14441	M60.14	0.240095	-3.74045	5.99251	0.624188	0.532504	NA
WBGene00049874	32422	21ur-3851	0.435947	-3.74045	5.99251	0.624188	0.532504	NA
WBGene00045144	28445	Y64G10A.10	0.525837	-3.74045	5.9925	0.624188	0.532504	NA
WBGene00219577	22437	linc-119	0.675733	-3.74045	5.9925	0.624188	0.532504	NA
WBGene00011716	23487	T11F9.19	2.05574	-3.72617	2.62086	1.42174	0.155103	NA
WBGene00005136	17020	srd-59	2.28315	-3.72486	2.79486	1.33275	0.182614	NA
WBGene00012415	16614	Y7A5A.9	1.67992	-3.72268	3.22381	1.15474	0.248195	NA
WBGene00013939	23574	ZK218.5	1.33855	-3.72078	3.91519	0.950345	0.341937	NA
WBGene00008279	22049	C53C7.3	1.66885	-3.72076	3.92637	0.947635	0.343315	NA
WBGene00017415	7816	F13A2.6	1.20486	-3.72037	4.15241	0.895954	0.370277	NA
WBGene00008474	21556	nhr-174	0.887986	-3.72011	4.32343	0.860454	0.389539	NA
WBGene00201279	14941	C44C10.14	0.97245	-3.72007	4.35343	0.854515	0.39282	NA
WBGene00000701	7999	col-127	0.764245	-3.71994	4.45321	0.835339	0.403527	NA
WBGene00010298	20043	F59A1.12	1.29075	-3.71988	4.49452	0.827649	0.40787	NA
WBGene00021291	23914	clec-121	0.949605	-3.71951	4.84747	0.767308	0.442898	NA
WBGene00170508	20246	21ur-13416	0.846807	-3.7194	4.95971	0.749923	0.453301	NA
WBGene00006085	16523	str-18	1.04171	-3.71936	4.99746	0.744251	0.456725	NA
WBGene00195671	22894	R186.9	0.94767	-3.71927	5.11002	0.727839	0.466712	NA
WBGene00018254	19730	F40H6.2	0.731258	-3.71917	5.24701	0.708817	0.478438	NA
WBGene00005596	23134	srj-8	0.724132	-3.71907	5.38179	0.691047	0.489536	NA
WBGene00197892	16343	Y39B6A.78	0.955977	-3.71873	5.96074	0.62387	0.532713	NA
WBGene00005732	26741	srv-21	0.515392	-3.71871	5.99318	0.620491	0.534935	NA
WBGene00255577	46799	mir-8205	0.515392	-3.71871	5.99318	0.620491	0.534935	NA
WBGene00189932	25001	Y26G10.7	0.632755	-3.71871	5.99318	0.620491	0.534935	NA
WBGene00021728	23934	Y49F6C.6	0.657934	-3.71871	5.99318	0.620491	0.534935	NA
WBGene00168382	36468	21ur-15081	0.305419	-3.71871	5.99318	0.620491	0.534935	NA
WBGene00077721	33441	mir-1022	0.285905	-3.71871	5.99318	0.620491	0.534935	NA
WBGene00173223	40700	21ur-11563	0.29004	-3.71871	5.99318	0.620491	0.534935	NA
WBGene00174380	24959	21ur-9307	0.29004	-3.71871	5.99318	0.620491	0.534935	NA
WBGene00199784	25894	F08G5.16	0.520759	-3.71871	5.99318	0.620491	0.534935	NA
WBGene00005449	16512	srh-243	0.236384	-3.71871	5.99318	0.620491	0.534935	NA
WBGene00016042	23717	C24A11.5	0.236384	-3.71871	5.99318	0.620491	0.534935	NA
WBGene00017655	23785	F21C10.5	0.236384	-3.71871	5.99318	0.620491	0.534935	NA
WBGene00022711	14819	irld-63	0.236384	-3.71871	5.99318	0.620491	0.534935	NA
WBGene00165418	33831	21ur-8278	0.236384	-3.71871	5.99318	0.620491	0.534935	NA
WBGene00171001	38757	21ur-8661	0.236384	-3.71871	5.99318	0.620491	0.534935	NA
WBGene00171526	39219	21ur-7583	0.236384	-3.71871	5.99318	0.620491	0.534935	NA
WBGene00174051	41420	21ur-12585	0.236384	-3.71871	5.99318	0.620491	0.534935	NA
WBGene00195514	42470	Y73A3A.1	0.236384	-3.71871	5.99318	0.620491	0.534935	NA
WBGene00195733	42596	T28B11.3	0.236384	-3.71871	5.99318	0.620491	0.534935	NA
WBGene00197339	20344	Y51A2D.28	0.236384	-3.71871	5.99318	0.620491	0.534935	NA
WBGene00198358	25623	F02E8.8	0.236384	-3.71871	5.99318	0.620491	0.534935	NA
WBGene00200987	45550	F46A9.10	0.236384	-3.71871	5.99318	0.620491	0.534935	NA
WBGene00201403	45778	LLC1.120	0.236384	-3.71871	5.99318	0.620491	0.534935	NA
WBGene00202437	46373	Y15E3A.16	0.236384	-3.71871	5.99318	0.620491	0.534935	NA
WBGene00269338	20457	R07C3.16	0.236384	-3.71871	5.99318	0.620491	0.534935	NA
WBGene00016820	22719	C50E3.9	0.334077	-3.71871	5.99318	0.620491	0.534935	NA
WBGene00017505	27785	F16B4.3	0.334077	-3.71871	5.99318	0.620491	0.534935	NA
WBGene00012571	23523	Y37H2A.11	0.343696	-3.71871	5.99318	0.620491	0.534935	NA
WBGene00168363	36452	21ur-8395	0.343696	-3.71871	5.99318	0.620491	0.534935	NA
WBGene00195508	25089	C11E4.9	0.343696	-3.71871	5.99318	0.620491	0.534935	NA
WBGene00200861	45483	F28A12.6	0.343696	-3.71871	5.99318	0.620491	0.534935	NA
WBGene00046020	28961	21ur-3185	0.365928	-3.71871	5.99318	0.620491	0.534935	NA
WBGene00077436	22376	F46B3.22	0.365928	-3.71871	5.99318	0.620491	0.534935	NA
WBGene00006024	23230	srx-133	0.43457	-3.71871	5.99318	0.620491	0.534935	NA
WBGene00006202	26988	str-156	0.725984	-3.71871	5.99318	0.620491	0.534935	NA
WBGene00017668	22736	ins-39	0.532904	-3.71871	5.99318	0.620491	0.534935	NA
WBGene00022341	27945	Y82E9BR.8	0.577792	-3.71871	5.99318	0.620491	0.534935	NA
WBGene00169990	37871	21ur-12928	0.669637	-3.71871	5.99318	0.620491	0.534935	NA
WBGene00013503	23558	clec-112	0.65007	-3.71871	5.99318	0.620491	0.534935	NA
WBGene00019930	23864	fbxc-35	0.657595	-3.71871	5.99318	0.620491	0.534935	NA
WBGene00015170	23681	B0410.1	0.321956	-3.71871	5.99317	0.62049	0.534935	NA
WBGene00199524	44714	C55B6.6	0.444647	-3.71871	5.99317	0.62049	0.534935	NA
WBGene00008898	23338	F16H6.8	0.624652	-3.71871	5.99317	0.62049	0.534935	NA
WBGene00006234	26995	str-198	0.428776	-3.71871	5.99317	0.62049	0.534935	NA
WBGene00018558	12773	srt-20	0.638032	-3.71871	5.99317	0.62049	0.534935	NA
WBGene00048795	31443	21ur-168	0.407528	-3.71871	5.99317	0.62049	0.534935	NA
WBGene00166302	34594	21ur-8650	0.825928	-3.71871	5.99317	0.62049	0.534935	NA
WBGene00196235	42869	W10C8.8	0.516435	-3.7187	5.99317	0.62049	0.534935	NA
WBGene00011516	27178	T06C12.9	1.86802	-3.69258	3.93714	0.937884	0.348304	NA
WBGene00170521	11906	21ur-9523	2.09625	-3.68106	2.25654	1.63128	0.10283	NA
WBGene00197301	43452	Y58A7A.9	3.19843	-3.67834	2.11113	1.74235	0.0814471	0.25164
WBGene00020328	10819	clec-20	1.24321	-3.67634	3.86864	0.950292	0.341964	NA
WBGene00012591	11179	nspe-1	848.832	-3.66798	0.359423	10.2052	1.87911e-24	2.82981e-22
WBGene00044972	28387	F35E12.11	0.947873	-3.65239	4.77778	0.764455	0.444596	NA
WBGene00044719	14360	clec-172	36.468	-3.64747	1.15716	3.15209	0.00162105	0.0145192
WBGene00013172	23545	Y53F4B.26	0.844163	-3.64367	4.78777	0.761037	0.446635	NA
WBGene00010754	15621	K10G4.5	18.1527	-3.64349	1.09904	3.31515	0.000915946	0.00901238
WBGene00019469	23852	srz-89	1.34132	-3.6263	5.03751	0.719859	0.471612	NA
WBGene00015838	22698	math-9	2.17595	-3.61127	3.16285	1.14178	0.253547	NA
WBGene00044897	12377	M01D7.9	3.97027	-3.59087	2.30352	1.55886	0.119028	0.31659
WBGene00045082	14844	F46F11.12	3.17873	-3.58387	1.96736	1.82167	0.0685058	NA
WBGene00010832	17605	M02G9.3	17.9177	-3.57749	0.760009	4.70716	2.51189e-06	4.8997e-05
WBGene00000989	2018	dhs-26	280.771	-3.55505	0.328367	10.8265	2.57908e-27	4.62932e-25
WBGene00201143	21419	F43C9.8	1.0602	-3.53022	3.97538	0.88802	0.37453	NA
WBGene00020546	14303	zig-13	7.46716	-3.52987	1.2255	2.88035	0.00397233	0.0298093
WBGene00194928	4467	ZC513.14	8.57754	-3.50668	1.70522	2.05644	0.03974	0.160587
WBGene00195363	18381	M01H9.6	3.32535	-3.50622	2.02958	1.72756	0.0840669	0.256723
WBGene00197714	9452	Y54E10BL.8	2.43871	-3.49454	2.37653	1.47044	0.141443	NA
WBGene00166467	34738	21ur-10556	1.16596	-3.49083	3.38731	1.03056	0.302747	NA
WBGene00000551	22468	clx-1	10.1513	-3.48411	3.08988	1.12759	0.259494	0.498133
WBGene00008009	19577	fbxa-171	1.95036	-3.46934	2.60622	1.33118	0.183131	NA
WBGene00012603	12175	nspe-6	55.5453	-3.45264	0.597886	5.77474	7.70699e-09	2.28255e-07
WBGene00005942	9585	srx-51	3.60021	-3.44915	1.67301	2.06165	0.0392413	0.159241
WBGene00018480	9324	otpl-7	30.3307	-3.44204	0.677347	5.08165	3.74178e-07	8.40664e-06
WBGene00021491	9880	comt-4	122.227	-3.43078	0.453041	7.57279	3.65283e-14	1.98504e-12
WBGene00219314	22434	C05B5.17	3.70783	-3.40756	1.97723	1.7234	0.0848155	0.257945
WBGene00021052	904	W06A11.1	250.155	-3.38901	0.350956	9.65651	4.61311e-22	5.65344e-20
WBGene00048542	31223	21ur-4332	0.188419	-3.38845	6.00467	0.564302	0.572549	NA
WBGene00048831	31477	21ur-1554	0.188419	-3.38845	6.00467	0.564302	0.572549	NA
WBGene00195414	25070	C33F10.16	0.188419	-3.38845	6.00467	0.564302	0.572549	NA
WBGene00220043	46633	R12C12.13	0.188419	-3.38845	6.00467	0.564302	0.572549	NA
WBGene00197252	25421	F41C6.10	0.286111	-3.38845	6.00467	0.564302	0.572549	NA
WBGene00166479	20226	21ur-9846	0.29573	-3.38845	6.00467	0.564302	0.572549	NA
WBGene00196781	43178	Y65B4BL.10	0.397675	-3.38845	6.00467	0.564302	0.572549	NA
WBGene00171412	39117	21ur-8397	0.349386	-3.38845	6.00467	0.564302	0.572549	NA
WBGene00045983	24169	21ur-3771	0.451888	-3.38845	6.00467	0.564302	0.572549	NA
WBGene00195580	21335	R07D5.3	0.510353	-3.38845	6.00467	0.564302	0.572549	NA
WBGene00200889	26101	K03C7.13	0.510353	-3.38845	6.00467	0.564302	0.572549	NA
WBGene00045083	20169	C04G6.12	0.237265	-3.38845	6.00467	0.564302	0.572549	NA
WBGene00196354	25258	M79.8	0.237265	-3.38845	6.00467	0.564302	0.572549	NA
WBGene00172815	21319	21ur-9448	0.248888	-3.38845	6.00467	0.564302	0.572549	NA
WBGene00047542	24256	21ur-3095	0.306846	-3.38845	6.00467	0.564302	0.572549	NA
WBGene00005181	26604	srg-24	0.364765	-3.38845	6.00467	0.564302	0.572549	NA
WBGene00048235	21820	21ur-918	0.364765	-3.38845	6.00467	0.564302	0.572549	NA
WBGene00196024	16297	C32C4.9	0.478408	-3.38845	6.00467	0.564302	0.572549	NA
WBGene00005244	17022	srh-19	0.617912	-3.38845	6.00467	0.564302	0.572549	NA
WBGene00169920	37809	21ur-6617	0.235094	-3.38845	6.00467	0.564302	0.572549	NA
WBGene00165081	33530	21ur-8247	0.299866	-3.38845	6.00467	0.564302	0.572549	NA
WBGene00168559	36622	21ur-13141	0.342406	-3.38845	6.00467	0.564302	0.572549	NA
WBGene00022972	28009	D1009.t2	0.42803	-3.38845	6.00467	0.564302	0.572549	NA
WBGene00020127	19760	R193.1	0.281769	-3.38844	6.00467	0.564302	0.572549	NA
WBGene00202322	16438	T23G5.11	0.563675	-3.38844	6.00467	0.564302	0.572549	NA
WBGene00166738	24575	21ur-7658	0.518222	-3.38844	6.00467	0.564302	0.572549	NA
WBGene00169595	24708	21ur-14036	0.328445	-3.38844	6.00467	0.564302	0.572549	NA
WBGene00174023	41396	21ur-15670	0.673534	-3.38844	6.00467	0.564301	0.572549	NA
WBGene00022083	2427	Y69A2AR.12	156.258	-3.38842	0.284102	11.9268	8.58105e-33	2.14768e-30
WBGene00197258	20340	C54G4.11	0.479954	-3.38841	5.94158	0.570288	0.568482	NA
WBGene00173776	24932	21ur-6808	0.521508	-3.38835	5.85229	0.578979	0.562603	NA
WBGene00012214	27224	W02D9.8	1.90615	-3.38793	5.28024	0.641625	0.521117	NA
WBGene00201953	20906	K06A5.10	1.1542	-3.38756	4.90237	0.691004	0.489563	NA
WBGene00171450	39151	21ur-14512	1.16857	-3.38745	4.81772	0.703124	0.481979	NA
WBGene00202479	20434	R05F9.15	1.03941	-3.38671	4.30288	0.78708	0.431235	NA
WBGene00196071	13911	F56F3.8	1.67958	-3.38662	4.24915	0.797011	0.425445	NA
WBGene00200397	16393	ZK632.17	1.49976	-3.38617	3.79047	0.893337	0.371677	NA
WBGene00005588	22010	sri-76	1.13101	-3.38561	3.78961	0.893392	0.371647	NA
WBGene00195803	19873	F46E10.13	0.982898	-3.3848	3.52679	0.959741	0.337186	NA
WBGene00165575	18349	21ur-7394	1.287	-3.38407	3.33565	1.01452	0.310335	NA
WBGene00220172	15957	Y49E10.36	0.906698	-3.384	3.31794	1.01991	0.307771	NA
WBGene00168884	22869	21ur-11141	1.112	-3.38306	3.12153	1.08378	0.278462	NA
WBGene00170354	8931	21ur-14926	2.02017	-3.38173	2.90649	1.16351	0.244623	NA
WBGene00194713	15400	F19B10.13	111.136	-3.38027	0.310199	10.8971	1.19009e-27	2.18019e-25
WBGene00005311	15525	srh-90	3.03563	-3.37944	2.63719	1.28145	0.200035	NA
WBGene00009786	14112	F46F2.1	5.59973	-3.37201	1.66873	2.02071	0.0433101	0.16993
WBGene00006083	21519	str-15	0.540617	-3.37052	5.96565	0.564987	0.572083	NA
WBGene00013007	8716	Y48E1B.8	308.212	-3.3642	0.362534	9.27969	1.69971e-20	1.74589e-18
WBGene00197040	25386	ZC477.17	0.184709	-3.36084	6.00575	0.559603	0.57575	NA
WBGene00172103	24828	21ur-7664	0.233555	-3.36084	6.00575	0.559603	0.57575	NA
WBGene00201321	16412	F53B1.15	0.374886	-3.36084	6.00575	0.559603	0.57575	NA
WBGene00201679	20898	R02D5.22	0.332969	-3.36084	6.00575	0.559603	0.57575	NA
WBGene00201021	45568	Y47D3B.22	0.382792	-3.36084	6.00575	0.559603	0.57575	NA
WBGene00201591	16918	F18A11.12	0.333886	-3.36084	6.00575	0.559603	0.57575	NA
WBGene00045959	24166	21ur-4442	0.4333	-3.36084	6.00575	0.559603	0.57575	NA
WBGene00196914	25359	R07E4.9	0.434217	-3.36084	6.00575	0.559603	0.575751	NA
WBGene00196579	21346	C06G1.8	0.586497	-3.36071	5.46075	0.61543	0.538271	NA
WBGene00200504	26024	T21H8.9	0.67421	-3.3607	5.43632	0.618194	0.536447	NA
WBGene00199304	22421	C07G1.12	0.626352	-3.36045	4.72479	0.711237	0.476937	NA
WBGene00048062	30802	21ur-2670	0.681076	-3.35996	3.94524	0.85165	0.394408	NA
WBGene00170795	16811	21ur-6717	0.700987	-3.35938	3.41753	0.982985	0.325615	NA
WBGene00044964	28381	F22D6.16	0.669567	-3.35908	3.21871	1.04361	0.296666	NA
WBGene00202056	46158	R03A10.14	0.950643	-3.35904	3.19822	1.05028	0.293587	NA
WBGene00005200	11050	srg-43	2.13599	-3.34425	2.66766	1.25363	0.209978	NA
WBGene00021160	908	gba-4	1298.98	-3.34029	0.575928	5.79984	6.63799e-09	1.98581e-07
WBGene00195208	8940	W02H3.3	1.07988	-3.33457	3.07202	1.08546	0.277716	NA
WBGene00005160	12541	srg-2	1.16003	-3.33442	3.15731	1.0561	0.290925	NA
WBGene00005362	15528	srh-146	1.32925	-3.334	3.4667	0.961721	0.33619	NA
WBGene00200101	17404	R06C1.11	0.805191	-3.3337	3.75646	0.887458	0.374833	NA
WBGene00000432	17967	ceh-7	1.14032	-3.33364	3.82203	0.872217	0.38309	NA
WBGene00196910	43242	H14A12.8	0.62581	-3.33346	4.06931	0.819172	0.412688	NA
WBGene00202101	26310	Y39A3CR.10	0.685562	-3.3332	4.52462	0.736681	0.461316	NA
WBGene00023386	21243	Y67D2.t2	0.560216	-3.33309	4.76088	0.700101	0.483864	NA
WBGene00200391	26004	C40H1.11	0.69776	-3.33295	5.17536	0.644003	0.519574	NA
WBGene00202243	21434	C14H10.6	0.686344	-3.3329	5.32089	0.62638	0.531066	NA
WBGene00022216	27938	fbxa-16	0.641237	-3.33285	5.50395	0.605538	0.544821	NA
WBGene00014976	22177	Y116A8C.7	3.43998	-3.33284	1.63814	2.03453	0.0418982	0.16645
WBGene00219871	46549	E01A2.11	0.486091	-3.33275	5.93598	0.561449	0.574492	NA
WBGene00050069	32602	21ur-3451	0.2835	-3.33273	6.00688	0.554819	0.579018	NA
WBGene00197075	25396	C01F6.12	0.320503	-3.33273	6.00688	0.554819	0.579018	NA
WBGene00172832	40350	21ur-15372	0.367914	-3.33273	6.00688	0.554819	0.579018	NA
WBGene00045112	28428	K12D12.8	0.41439	-3.33273	6.00688	0.554819	0.579018	NA
WBGene00219840	26836	C29F9.15	0.448611	-3.33273	6.00688	0.554819	0.579018	NA
WBGene00005808	23177	srw-61	0.180999	-3.33273	6.00688	0.554819	0.579018	NA
WBGene00044307	28322	F58F9.9	0.180999	-3.33273	6.00688	0.554819	0.579018	NA
WBGene00050031	32569	21ur-2615	0.180999	-3.33273	6.00688	0.554819	0.579018	NA
WBGene00168737	21300	21ur-11546	0.180999	-3.33273	6.00688	0.554819	0.579018	NA
WBGene00199432	44663	R06C1.10	0.180999	-3.33273	6.00688	0.554819	0.579018	NA
WBGene00235160	46754	CD4.18	0.180999	-3.33273	6.00688	0.554819	0.579018	NA
WBGene00219934	20443	F35F11.4	0.379022	-3.33273	6.00688	0.554819	0.579018	NA
WBGene00011991	20054	T24D5.3	0.388758	-3.33273	6.00688	0.554819	0.579018	NA
WBGene00198652	25670	F25H8.12	0.372041	-3.33273	6.00688	0.554819	0.579018	NA
WBGene00000859	22964	cwp-1	0.688558	-3.33273	6.00688	0.554819	0.579018	NA
WBGene00009487	12107	clec-232	100.916	-3.32537	0.315662	10.5346	5.98431e-26	9.93843e-24
WBGene00007962	8612	C35D6.5	5.32652	-3.32407	2.05093	1.62076	0.105069	0.292567
WBGene00189979	10920	W04A8.8	2.67721	-3.32255	1.89937	1.74928	0.0802418	NA
WBGene00171479	12404	21ur-9213	3.16383	-3.31948	1.99503	1.66387	0.0961377	NA
WBGene00015491	19192	C05E4.12	2.70073	-3.31734	2.07738	1.59689	0.11029	NA
WBGene00021746	22324	Y50D4B.7	3.73771	-3.31717	2.08382	1.59187	0.111413	0.303188
WBGene00008866	15092	F15G9.2	1.75233	-3.30803	3.5142	0.941333	0.346534	NA
WBGene00199323	483	C08D8.5	1.33512	-3.30688	3.89096	0.849889	0.395387	NA
WBGene00005415	15997	srh-204	0.84564	-3.30621	4.18915	0.789231	0.429977	NA
WBGene00200606	10952	Y37E3.29	1.54658	-3.30563	4.50891	0.733134	0.463477	NA
WBGene00171069	24770	21ur-7907	0.666472	-3.30557	4.55199	0.726181	0.467728	NA
WBGene00047270	15864	21ur-2736	0.83587	-3.30554	4.5714	0.723092	0.469623	NA
WBGene00077510	33389	Y42A5A.6	0.226809	-3.30412	6.00805	0.549948	0.582355	NA
WBGene00197903	25529	T28B4.10	0.230944	-3.30412	6.00805	0.549948	0.582355	NA
WBGene00219939	46579	F38H4.16	0.24206	-3.30412	6.00805	0.549948	0.582355	NA
WBGene00172654	5462	21ur-15386	0.325548	-3.30412	6.00805	0.549948	0.582355	NA
WBGene00197661	21365	R12B2.9	0.347992	-3.30412	6.00805	0.549948	0.582355	NA
WBGene00219606	15449	linc-133	0.478245	-3.30412	6.00805	0.549948	0.582355	NA
WBGene00006117	16020	str-52	0.177288	-3.30412	6.00805	0.549948	0.582355	NA
WBGene00009828	21078	F47G4.8	0.177288	-3.30412	6.00805	0.549948	0.582355	NA
WBGene00023333	28227	R148.t3	0.177288	-3.30412	6.00805	0.549948	0.582355	NA
WBGene00050814	33273	21ur-2986	0.177288	-3.30412	6.00805	0.549948	0.582355	NA
WBGene00168605	36664	21ur-5893	0.177288	-3.30412	6.00805	0.549948	0.582355	NA
WBGene00195292	42360	Y47D3B.13	0.177288	-3.30412	6.00805	0.549948	0.582355	NA
WBGene00197522	43586	T21B6.10	0.177288	-3.30412	6.00805	0.549948	0.582355	NA
WBGene00197834	25516	T16G1.15	0.177288	-3.30412	6.00805	0.549948	0.582355	NA
WBGene00201334	45741	T10A3.5	0.177288	-3.30412	6.00805	0.549948	0.582355	NA
WBGene00198848	44336	B0205.16	0.316792	-3.30412	6.00805	0.549948	0.582355	NA
WBGene00195888	14403	K07A12.9	0.304073	-3.30412	6.00805	0.549948	0.582355	NA
WBGene00047350	24250	21ur-3962	0.2846	-3.30412	6.00805	0.549948	0.582355	NA
WBGene00200553	45304	C02B10.74	0.2846	-3.30412	6.00805	0.549948	0.582355	NA
WBGene00202355	14947	M176.15	0.375371	-3.30412	6.00805	0.549948	0.582355	NA
WBGene00199434	21395	C17H12.34	0.382292	-3.30412	6.00805	0.549948	0.582355	NA
WBGene00009955	23376	eak-4	0.479984	-3.30412	6.00805	0.549948	0.582355	NA
WBGene00005863	26781	srw-116	0.404524	-3.30412	6.00805	0.549948	0.582355	NA
WBGene00219906	26844	F19G12.14	0.223964	-3.30411	6.00805	0.549948	0.582355	NA
WBGene00200725	13937	Y39A3CL.14	0.277619	-3.30411	6.00805	0.549948	0.582355	NA
WBGene00197486	25460	R151.15	0.331275	-3.30411	6.00805	0.549948	0.582355	NA
WBGene00173429	40880	21ur-12267	0.412988	-3.30411	6.00805	0.549948	0.582355	NA
WBGene00219574	15944	linc-54	0.368331	-3.30411	6.00805	0.549948	0.582355	NA
WBGene00197378	7952	T22A3.11	0.52984	-3.30411	6.00805	0.549948	0.582355	NA
WBGene00197604	17382	K01G5.12	0.463522	-3.30411	6.00805	0.549948	0.582355	NA
WBGene00219929	26848	F32B4.12	0.680233	-3.30411	6.00805	0.549948	0.582355	NA
WBGene00195211	17361	C34F6.12	1.22025	-3.30159	3.15536	1.04635	0.295402	NA
WBGene00006925	634	vit-1	272407	-3.27909	0.449431	7.29608	2.96267e-13	1.4747e-11
WBGene00000483	16973	che-1	2.17598	-3.27205	2.35385	1.39009	0.164502	NA
WBGene00012816	21111	scl-21	2.83497	-3.2611	1.81233	1.7994	0.0719556	NA
WBGene00255597	21453	pals-21	14.0139	-3.23801	1.30813	2.47529	0.0133128	0.0743224
WBGene00220134	26883	Y17G7B.25	3.59971	-3.23732	1.98402	1.6317	0.102743	0.289059
WBGene00023277	21241	F29C4.3	4.11871	-3.22683	2.10167	1.53536	0.124695	0.325378
WBGene00020009	22290	R11F4.3	720.981	-3.20783	0.194633	16.4814	4.99029e-61	4.03079e-58
WBGene00005912	12552	srx-21	3.64708	-3.20207	2.05695	1.55671	0.119539	0.317523
WBGene00016670	11754	ilys-3	10.6779	-3.19267	1.15093	2.774	0.00553713	0.0388452
WBGene00194888	8451	K10H10.13	1.75933	-3.19253	2.61289	1.22184	0.221768	NA
WBGene00009628	3181	tatn-1	3675.09	-3.18555	0.277522	11.4786	1.69077e-30	3.5347e-28
WBGene00206500	21439	F55C9.15	4.27788	-3.17401	2.06403	1.53778	0.124103	0.324359
WBGene00000521	19962	cky-1	5.7435	-3.16932	1.7804	1.78011	0.0750575	0.240103
WBGene00020961	13821	sknr-1	6.48532	-3.16791	1.61819	1.95768	0.0502671	0.187456
WBGene00049014	14852	21ur-1549	1.39725	-3.16646	2.9366	1.07827	0.280912	NA
WBGene00016268	12729	C30G4.2	4.63099	-3.15294	1.45288	2.17014	0.0299966	0.132729
WBGene00200296	25981	M79.13	0.564995	-3.15023	5.9692	0.527748	0.597674	NA
WBGene00174998	24993	21ur-6715	0.841387	-3.12525	5.92804	0.527197	0.598057	NA
WBGene00012586	23524	Y38E10A.8	1.29257	-3.12517	3.44825	0.906306	0.364774	NA
WBGene00220170	19448	Y48C3A.25	1.05983	-3.1231	3.92601	0.79549	0.426329	NA
WBGene00017501	5324	pud-3	5634.83	-3.11388	0.158376	19.6613	4.62318e-86	1.02692e-82
WBGene00198681	12432	W06A7.8	2.56823	-3.10571	1.96424	1.58112	0.11385	NA
WBGene00022189	17282	Y71H2AR.2	10.6765	-3.10555	1.16275	2.67086	0.00756572	0.0493368
WBGene00200176	9967	T19A5.11	1.20871	-3.10153	2.87094	1.08032	0.28	NA
WBGene00017116	10754	fbxb-78	13.397	-3.05922	1.09643	2.79016	0.00526819	0.0374313
WBGene00044955	16175	K07C11.11	1.40912	-3.05691	2.82907	1.08054	0.279902	NA
WBGene00000503	20964	cht-1	3476.45	-3.04945	0.193499	15.7595	5.9079e-56	3.88828e-53
WBGene00219239	20926	K05F6.14	2.13639	-3.03364	2.67848	1.1326	0.257384	NA
WBGene00077757	466	E02H4.7	359.888	-3.03098	0.330529	9.1701	4.72579e-20	4.71782e-18
WBGene00006276	27017	str-249	16.6289	-3.01753	0.764527	3.94692	7.9163e-05	0.00108712
WBGene00012065	19137	fbxb-2	18.7227	-3.0102	0.729401	4.12695	3.67611e-05	0.000558001
WBGene00016483	2309	C36C5.14	11.4537	-3.00834	0.910572	3.30379	0.000953874	0.00930634
WBGene00014883	18694	Y39C12A.2	37.3755	-3.00193	1.05265	2.85179	0.00434745	0.0320956
WBGene00009842	2685	igeg-2	227.597	-2.99959	0.31037	9.66455	4.2649e-22	5.263e-20
WBGene00044917	3463	F40F8.12	3.89707	-2.99919	1.72007	1.74365	0.0812207	0.25129
WBGene00008129	14092	C47A10.12	10.8766	-2.97365	1.54195	1.9285	0.0537935	0.195913
WBGene00017267	27778	numr-2	14.8396	-2.96373	0.751256	3.94503	7.97909e-05	0.00109332
WBGene00021303	909	Y32G9A.5	1.33768	-2.95915	3.55732	0.831849	0.405494	NA
WBGene00018741	7333	comt-1	4.56473	-2.95084	1.75306	1.68326	0.0923255	0.270998
WBGene00005386	12545	srh-170	0.940481	-2.94411	3.71777	0.791903	0.428417	NA
WBGene00045361	18329	clec-253	1.13255	-2.94302	3.45188	0.852585	0.393889	NA
WBGene00199301	15930	K02A4.8	1.41643	-2.9401	2.94848	0.997159	0.318687	NA
WBGene00010186	23388	nhr-283	3.70931	-2.93987	1.78714	1.64501	0.0999668	0.283998
WBGene00200150	22921	C07A9.16	1.87258	-2.93322	2.30815	1.27081	0.203797	NA
WBGene00012583	260	clec-4	781.048	-2.93253	0.257586	11.3847	4.9859e-30	1.03023e-27
WBGene00007423	12062	C08B6.2	117.621	-2.91517	0.382882	7.61375	2.66256e-14	1.47855e-12
WBGene00077725	21833	mir-1832.1	1.01179	-2.91442	3.10197	0.939536	0.347455	NA
WBGene00198446	12431	T25D10.6	1.31163	-2.91327	2.86185	1.01797	0.308694	NA
WBGene00019253	19264	H31G24.1	1.42759	-2.91139	2.55319	1.14029	0.254164	NA
WBGene00021609	27929	irld-17	1.88402	-2.91118	2.52362	1.15358	0.248674	NA
WBGene00194683	21327	T20G5.15	5.46911	-2.90833	1.50537	1.93197	0.0533626	0.195034
WBGene00199997	25931	H32C10.97	0.564841	-2.90506	5.97383	0.486298	0.626756	NA
WBGene00195412	13909	K03H1.16	0.712054	-2.90358	4.32509	0.671333	0.502009	NA
WBGene00220073	26875	T19E7.29	0.679172	-2.89037	5.97413	0.483815	0.628517	NA
WBGene00011264	23470	R13H4.6	1.16544	-2.88808	3.50471	0.824056	0.409908	NA
WBGene00023066	19802	F53F10.7	2.34443	-2.87638	2.22315	1.29383	0.195724	NA
WBGene00017060	19212	D2063.1	128.509	-2.87574	0.376427	7.63957	2.17945e-14	1.22949e-12
WBGene00044963	28380	K07C5.11	2.39716	-2.87021	2.08078	1.37939	0.167775	NA
WBGene00219837	17444	C28D4.17	3.12071	-2.86262	2.20842	1.29623	0.194897	NA
WBGene00021999	11347	thn-5	39.0516	-2.85665	0.523923	5.45243	4.96863e-08	1.29651e-06
WBGene00043059	17822	srab-26	2.01143	-2.83179	2.54439	1.11296	0.265727	NA
WBGene00015406	21667	C03H5.4	1.78339	-2.83019	2.63008	1.07609	0.281888	NA
WBGene00044961	19339	F56A12.5	0.665776	-2.8292	5.13126	0.551366	0.581383	NA
WBGene00008577	11614	F08G2.5	439.967	-2.82502	0.251273	11.2428	2.51239e-29	4.96057e-27
WBGene00201793	26249	E01H11.5	1.47072	-2.80714	3.5225	0.796916	0.4255	NA
WBGene00021002	5892	W03F9.4	127.882	-2.80318	0.405396	6.91466	4.68979e-12	2.06793e-10
WBGene00001738	22968	grl-29	0.125613	-2.80269	6.03271	0.464582	0.642231	NA
WBGene00001904	26462	his-30	0.125613	-2.80269	6.03271	0.464582	0.642231	NA
WBGene00003098	26477	lys-9	0.125613	-2.80269	6.03271	0.464582	0.642231	NA
WBGene00005233	16503	srh-7	0.125613	-2.80269	6.03271	0.464582	0.642231	NA
WBGene00005761	26747	srw-14	0.125613	-2.80269	6.03271	0.464582	0.642231	NA
WBGene00005768	23167	srw-21	0.125613	-2.80269	6.03271	0.464582	0.642231	NA
WBGene00005951	23212	srx-60	0.125613	-2.80269	6.03271	0.464582	0.642231	NA
WBGene00006966	27031	xtr-2	0.125613	-2.80269	6.03271	0.464582	0.642231	NA
WBGene00007889	17059	C33A12.16	0.125613	-2.80269	6.03271	0.464582	0.642231	NA
WBGene00008242	23312	ceh-75	0.125613	-2.80269	6.03271	0.464582	0.642231	NA
WBGene00008716	23331	F11F1.4	0.125613	-2.80269	6.03271	0.464582	0.642231	NA
WBGene00012051	23498	T26E4.9	0.125613	-2.80269	6.03271	0.464582	0.642231	NA
WBGene00012303	27228	W06D11.5	0.125613	-2.80269	6.03271	0.464582	0.642231	NA
WBGene00013937	27295	ZK218.3	0.125613	-2.80269	6.03271	0.464582	0.642231	NA
WBGene00014535	27507	T28D6.t1	0.125613	-2.80269	6.03271	0.464582	0.642231	NA
WBGene00014597	16642	Y65A5A.t2	0.125613	-2.80269	6.03271	0.464582	0.642231	NA
WBGene00014922	10709	Y57G11B.4	0.125613	-2.80269	6.03271	0.464582	0.642231	NA
WBGene00014971	27690	Y113G7A.t3	0.125613	-2.80269	6.03271	0.464582	0.642231	NA
WBGene00019470	23853	cyp-35B3	0.125613	-2.80269	6.03271	0.464582	0.642231	NA
WBGene00020922	23900	W01H2.2	0.125613	-2.80269	6.03271	0.464582	0.642231	NA
WBGene00021029	23902	W04D12.1	0.125613	-2.80269	6.03271	0.464582	0.642231	NA
WBGene00021612	23929	Y46H3D.8	0.125613	-2.80269	6.03271	0.464582	0.642231	NA
WBGene00022481	23952	srz-9	0.125613	-2.80269	6.03271	0.464582	0.642231	NA
WBGene00023368	28252	Y37F4.t1	0.125613	-2.80269	6.03271	0.464582	0.642231	NA
WBGene00023376	28258	Y53G8B.t4	0.125613	-2.80269	6.03271	0.464582	0.642231	NA
WBGene00043283	28290	F23B2.9	0.125613	-2.80269	6.03271	0.464582	0.642231	NA
WBGene00044096	28304	srh-96	0.125613	-2.80269	6.03271	0.464582	0.642231	NA
WBGene00044369	21793	irld-67	0.125613	-2.80269	6.03271	0.464582	0.642231	NA
WBGene00045022	24102	K04D7.7	0.125613	-2.80269	6.03271	0.464582	0.642231	NA
WBGene00047228	30053	21ur-4700	0.125613	-2.80269	6.03271	0.464582	0.642231	NA
WBGene00047634	30424	21ur-4408	0.125613	-2.80269	6.03271	0.464582	0.642231	NA
WBGene00047918	30670	21ur-3286	0.125613	-2.80269	6.03271	0.464582	0.642231	NA
WBGene00049731	32289	21ur-3547	0.125613	-2.80269	6.03271	0.464582	0.642231	NA
WBGene00050199	32719	21ur-4782	0.125613	-2.80269	6.03271	0.464582	0.642231	NA
WBGene00050379	32882	21ur-1679	0.125613	-2.80269	6.03271	0.464582	0.642231	NA
WBGene00050400	32899	21ur-104	0.125613	-2.80269	6.03271	0.464582	0.642231	NA
WBGene00050606	33086	21ur-363	0.125613	-2.80269	6.03271	0.464582	0.642231	NA
WBGene00165459	33865	21ur-14260	0.125613	-2.80269	6.03271	0.464582	0.642231	NA
WBGene00165773	34143	21ur-8942	0.125613	-2.80269	6.03271	0.464582	0.642231	NA
WBGene00168058	36172	21ur-12312	0.125613	-2.80269	6.03271	0.464582	0.642231	NA
WBGene00168066	36179	21ur-6237	0.125613	-2.80269	6.03271	0.464582	0.642231	NA
WBGene00168140	36247	21ur-5509	0.125613	-2.80269	6.03271	0.464582	0.642231	NA
WBGene00168795	36836	21ur-5712	0.125613	-2.80269	6.03271	0.464582	0.642231	NA
WBGene00169670	37590	21ur-8079	0.125613	-2.80269	6.03271	0.464582	0.642231	NA
WBGene00169754	37663	21ur-12240	0.125613	-2.80269	6.03271	0.464582	0.642231	NA
WBGene00169825	37728	21ur-8915	0.125613	-2.80269	6.03271	0.464582	0.642231	NA
WBGene00171291	24780	21ur-15538	0.125613	-2.80269	6.03271	0.464582	0.642231	NA
WBGene00171873	24814	21ur-13106	0.125613	-2.80269	6.03271	0.464582	0.642231	NA
WBGene00172214	11412	21ur-7854	0.125613	-2.80269	6.03271	0.464582	0.642231	NA
WBGene00172324	39914	21ur-7778	0.125613	-2.80269	6.03271	0.464582	0.642231	NA
WBGene00173283	40750	21ur-7228	0.125613	-2.80269	6.03271	0.464582	0.642231	NA
WBGene00173498	40941	21ur-11188	0.125613	-2.80269	6.03271	0.464582	0.642231	NA
WBGene00173564	40995	21ur-12095	0.125613	-2.80269	6.03271	0.464582	0.642231	NA
WBGene00173845	20725	21ur-10797	0.125613	-2.80269	6.03271	0.464582	0.642231	NA
WBGene00174412	41742	21ur-7397	0.125613	-2.80269	6.03271	0.464582	0.642231	NA
WBGene00189970	42281	mir-4812	0.125613	-2.80269	6.03271	0.464582	0.642231	NA
WBGene00195215	20742	F55G7.5	0.125613	-2.80269	6.03271	0.464582	0.642231	NA
WBGene00195558	25100	C18A3.13	0.125613	-2.80269	6.03271	0.464582	0.642231	NA
WBGene00195656	42550	T01H3.6	0.125613	-2.80269	6.03271	0.464582	0.642231	NA
WBGene00195789	42624	K08A8.6	0.125613	-2.80269	6.03271	0.464582	0.642231	NA
WBGene00196300	20314	T04C10.7	0.125613	-2.80269	6.03271	0.464582	0.642231	NA
WBGene00196571	43063	T06E4.17	0.125613	-2.80269	6.03271	0.464582	0.642231	NA
WBGene00196622	25298	F29D11.3	0.125613	-2.80269	6.03271	0.464582	0.642231	NA
WBGene00196632	20325	F22F4.8	0.125613	-2.80269	6.03271	0.464582	0.642231	NA
WBGene00196696	43131	H06I04.11	0.125613	-2.80269	6.03271	0.464582	0.642231	NA
WBGene00196968	43272	R06F6.13	0.125613	-2.80269	6.03271	0.464582	0.642231	NA
WBGene00197577	43619	W08F4.16	0.125613	-2.80269	6.03271	0.464582	0.642231	NA
WBGene00197758	43730	C36F7.15	0.125613	-2.80269	6.03271	0.464582	0.642231	NA
WBGene00197952	43840	C18D1.14	0.125613	-2.80269	6.03271	0.464582	0.642231	NA
WBGene00198120	17385	K03E5.6	0.125613	-2.80269	6.03271	0.464582	0.642231	NA
WBGene00198274	25608	F40H3.10	0.125613	-2.80269	6.03271	0.464582	0.642231	NA
WBGene00198328	44048	Y18H1A.17	0.125613	-2.80269	6.03271	0.464582	0.642231	NA
WBGene00199170	44510	C02D4.10	0.125613	-2.80269	6.03271	0.464582	0.642231	NA
WBGene00199222	44546	T07H6.8	0.125613	-2.80269	6.03271	0.464582	0.642231	NA
WBGene00199353	20828	C05B10.16	0.125613	-2.80269	6.03271	0.464582	0.642231	NA
WBGene00199585	44750	ZK1193.9	0.125613	-2.80269	6.03271	0.464582	0.642231	NA
WBGene00199678	44810	T10E10.12	0.125613	-2.80269	6.03271	0.464582	0.642231	NA
WBGene00199696	25877	H21P03.8	0.125613	-2.80269	6.03271	0.464582	0.642231	NA
WBGene00200169	25960	K07H8.15	0.125613	-2.80269	6.03271	0.464582	0.642231	NA
WBGene00200253	45130	C01G8.10	0.125613	-2.80269	6.03271	0.464582	0.642231	NA
WBGene00200415	26007	B0244.14	0.125613	-2.80269	6.03271	0.464582	0.642231	NA
WBGene00201634	45919	C18F3.11	0.125613	-2.80269	6.03271	0.464582	0.642231	NA
WBGene00201818	46031	R186.14	0.125613	-2.80269	6.03271	0.464582	0.642231	NA
WBGene00201827	46034	F26D11.19	0.125613	-2.80269	6.03271	0.464582	0.642231	NA
WBGene00201881	18428	R01E6.19	0.125613	-2.80269	6.03271	0.464582	0.642231	NA
WBGene00202113	26313	B0457.18	0.125613	-2.80269	6.03271	0.464582	0.642231	NA
WBGene00202239	46264	Y37E11B.14	0.125613	-2.80269	6.03271	0.464582	0.642231	NA
WBGene00202334	17428	C29E4.18	0.125613	-2.80269	6.03271	0.464582	0.642231	NA
WBGene00220097	26879	T25G12.15	0.125613	-2.80269	6.03271	0.464582	0.642231	NA
WBGene00011150	23461	nhr-269	0.223305	-2.80269	6.03271	0.464582	0.642231	NA
WBGene00011595	21613	T07G12.4	0.223305	-2.80269	6.03271	0.464582	0.642231	NA
WBGene00172671	40212	21ur-10484	0.223305	-2.80269	6.03271	0.464582	0.642231	NA
WBGene00219215	46425	F13B12.15	0.223305	-2.80269	6.03271	0.464582	0.642231	NA
WBGene00255731	20455	T02B11.11	0.223305	-2.80269	6.03271	0.464582	0.642231	NA
WBGene00195850	11928	F57C7.7	0.246551	-2.80269	6.03271	0.464582	0.642231	NA
WBGene00167897	24620	21ur-13198	0.228114	-2.80269	6.03271	0.464582	0.642231	NA
WBGene00169697	37612	21ur-5563	0.252398	-2.80269	6.03271	0.464582	0.642231	NA
WBGene00048316	24300	21ur-830	0.232924	-2.80269	6.03271	0.464582	0.642231	NA
WBGene00172202	39810	21ur-5941	0.232924	-2.80269	6.03271	0.464582	0.642231	NA
WBGene00198220	25591	C34D1.10	0.232924	-2.80269	6.03271	0.464582	0.642231	NA
WBGene00200059	25941	K02B2.36	0.232924	-2.80269	6.03271	0.464582	0.642231	NA
WBGene00005440	21009	srh-233	0.255156	-2.80269	6.03271	0.464582	0.642231	NA
WBGene00005360	23078	srh-144	0.314821	-2.80269	6.03271	0.464582	0.642231	NA
WBGene00006079	26950	str-11	0.314821	-2.80269	6.03271	0.464582	0.642231	NA
WBGene00005265	12543	srh-42	0.323798	-2.80269	6.03271	0.464582	0.642231	NA
WBGene00049728	32286	21ur-1955	0.276961	-2.80269	6.03271	0.464582	0.642231	NA
WBGene00268202	26930	T27B7.9	0.28177	-2.80269	6.03271	0.464582	0.642231	NA
WBGene00003760	26558	nlp-22	0.304677	-2.80269	6.03271	0.464582	0.642231	NA
WBGene00005706	26735	sru-43	0.330616	-2.80269	6.03271	0.464582	0.642231	NA
WBGene00044052	28301	Y57A10C.12	0.330616	-2.80269	6.03271	0.464582	0.642231	NA
WBGene00014068	20548	nhr-255	0.428308	-2.80269	6.03271	0.464582	0.642231	NA
WBGene00219704	19442	linc-127	0.428308	-2.80269	6.03271	0.464582	0.642231	NA
WBGene00005470	23108	srh-264	0.437928	-2.80269	6.03271	0.464582	0.642231	NA
WBGene00165679	20683	21ur-9408	0.477155	-2.80269	6.03271	0.464582	0.642231	NA
WBGene00194661	19377	Y57G11C.1131	0.623693	-2.80269	6.03271	0.464582	0.642231	NA
WBGene00006070	16019	str-2	0.359709	-2.80269	6.03271	0.464582	0.642231	NA
WBGene00011458	19127	irld-47	0.42149	-2.80269	6.03271	0.464582	0.642231	NA
WBGene00005546	23121	sri-34	0.362467	-2.80269	6.03271	0.464582	0.642231	NA
WBGene00005043	23004	sra-17	0.450583	-2.80269	6.03271	0.464582	0.642231	NA
WBGene00044103	20626	srbc-47	0.453341	-2.80269	6.03271	0.464582	0.642231	NA
WBGene00023228	28180	BE0003N10.t2	0.471521	-2.80269	6.03271	0.464582	0.642231	NA
WBGene00005667	26728	sru-4	0.406504	-2.80269	6.03271	0.464582	0.642231	NA
WBGene00005064	19517	sra-38	0.478504	-2.80269	6.03271	0.464582	0.642231	NA
WBGene00045487	17320	C08E8.7	0.617517	-2.80269	6.03271	0.464582	0.642231	NA
WBGene00005376	26649	srh-160	0.265117	-2.80269	6.03271	0.464581	0.642231	NA
WBGene00196392	42950	ZC487.7	0.265117	-2.80269	6.03271	0.464581	0.642231	NA
WBGene00269332	494	Y39F10A.6	0.265117	-2.80269	6.03271	0.464581	0.642231	NA
WBGene00045327	28487	mir-793	0.263682	-2.80269	6.03271	0.464581	0.642231	NA
WBGene00005881	26792	srw-134	0.224654	-2.80269	6.03271	0.464581	0.642231	NA
WBGene00199691	25875	F56B3.14	0.224654	-2.80269	6.03271	0.464581	0.642231	NA
WBGene00197890	25527	F47C8.2	0.30702	-2.80269	6.03271	0.464581	0.642231	NA
WBGene00016284	27740	C31B8.9	0.323696	-2.80269	6.03271	0.464581	0.642231	NA
WBGene00010415	27144	irld-39	0.320997	-2.80269	6.03271	0.464581	0.642231	NA
WBGene00003332	22981	mir-239.1	0.353862	-2.80269	6.03271	0.464581	0.642231	NA
WBGene00050931	18876	F59B2.14	0.353862	-2.80269	6.03271	0.464581	0.642231	NA
WBGene00005270	11051	srh-47	0.528699	-2.80269	6.03271	0.464581	0.642231	NA
WBGene00202480	46400	ZK829.13	0.499213	-2.80269	6.03271	0.464581	0.642231	NA
WBGene00170443	38270	21ur-7742	0.195365	-2.80269	6.03271	0.464581	0.642231	NA
WBGene00046836	29704	21ur-794	0.194647	-2.80269	6.03271	0.464581	0.642231	NA
WBGene00049589	32160	21ur-4486	0.175133	-2.80269	6.03271	0.464581	0.642231	NA
WBGene00174873	42148	21ur-7096	0.175133	-2.80269	6.03271	0.464581	0.642231	NA
WBGene00044454	19820	F27B3.8	0.174459	-2.80269	6.03271	0.464581	0.642231	NA
WBGene00046545	24197	21ur-10	0.174459	-2.80269	6.03271	0.464581	0.642231	NA
WBGene00165841	24514	21ur-13661	0.174459	-2.80269	6.03271	0.464581	0.642231	NA
WBGene00198839	25699	B0414.11	0.174459	-2.80269	6.03271	0.464581	0.642231	NA
WBGene00197694	25492	D2089.6	0.189005	-2.80269	6.03271	0.464581	0.642231	NA
WBGene00198063	25559	H05L03.7	0.189005	-2.80269	6.03271	0.464581	0.642231	NA
WBGene00200035	45008	Y59C2A.4	0.189005	-2.80269	6.03271	0.464581	0.642231	NA
WBGene00047728	24267	21ur-5136	0.179268	-2.80269	6.03271	0.464581	0.642231	NA
WBGene00047951	24282	21ur-940	0.179268	-2.80269	6.03271	0.464581	0.642231	NA
WBGene00170842	38622	21ur-15229	0.179268	-2.80269	6.03271	0.464581	0.642231	NA
WBGene00195847	42654	Y52E8A.7	0.179268	-2.80269	6.03271	0.464581	0.642231	NA
WBGene00196098	476	Y55F3AR.4	0.179268	-2.80269	6.03271	0.464581	0.642231	NA
WBGene00046979	29831	21ur-1522	0.190384	-2.80269	6.03271	0.464581	0.642231	NA
WBGene00077534	24442	F41D3.14	0.190384	-2.80269	6.03271	0.464581	0.642231	NA
WBGene00006277	27018	str-250	0.224705	-2.80269	6.03271	0.464581	0.642231	NA
WBGene00196603	43084	C13G3.5	0.224705	-2.80269	6.03271	0.464581	0.642231	NA
WBGene00202434	26370	K03C7.15	0.24902	-2.80269	6.03271	0.464581	0.642231	NA
WBGene00018556	27819	srt-36	0.250853	-2.80269	6.03271	0.464581	0.642231	NA
WBGene00169607	37538	21ur-9141	0.393891	-2.80269	6.03271	0.464581	0.642231	NA
WBGene00044128	20627	BE10.6	0.294406	-2.80269	6.03271	0.464581	0.642231	NA
WBGene00005600	26711	srj-12	0.418689	-2.80269	6.03271	0.464581	0.642231	NA
WBGene00200651	45363	ZC477.18	0.27831	-2.80269	6.03271	0.464581	0.642231	NA
WBGene00198480	44130	F54D5.21	0.362775	-2.80269	6.03271	0.464581	0.642231	NA
WBGene00197398	43517	F29F11.9	0.300207	-2.80269	6.03271	0.464581	0.642231	NA
WBGene00165027	33486	21ur-11151	0.382238	-2.80269	6.03271	0.464581	0.642231	NA
WBGene00173246	15887	21ur-8554	0.41373	-2.80269	6.03271	0.464581	0.642231	NA
WBGene00011547	23477	T06G6.5	0.632752	-2.80269	6.03271	0.464581	0.642231	NA
WBGene00202052	11451	C41G11.20	0.363599	-2.80269	6.03271	0.464581	0.642231	NA
WBGene00201511	21424	Y46E12A.9	0.453734	-2.80269	6.03271	0.464581	0.642231	NA
WBGene00011837	27203	srsx-33	0.509063	-2.80269	6.03271	0.464581	0.642231	NA
WBGene00050932	24428	F46B3.19	0.482391	-2.80269	6.03271	0.464581	0.642231	NA
WBGene00020494	18252	T13G4.7	0.633987	-2.80269	6.03271	0.464581	0.642231	NA
WBGene00016255	23723	C30E1.6	0.807434	-2.80269	6.03271	0.464581	0.642231	NA
WBGene00199923	44944	K04G2.14	0.515377	-2.80269	6.03271	0.464581	0.642231	NA
WBGene00009032	27100	bgnt-1.3	0.643707	-2.80269	6.03271	0.464581	0.642231	NA
WBGene00005701	17029	sru-38	0.616037	-2.80269	6.03271	0.464581	0.642231	NA
WBGene00009912	23374	srz-94	0.296757	-2.80268	6.03271	0.464581	0.642231	NA
WBGene00015888	27730	C17C3.2	0.417695	-2.80268	6.03271	0.464581	0.642231	NA
WBGene00173319	40780	21ur-6726	0.172288	-2.80268	6.03271	0.464581	0.642231	NA
WBGene00195791	20299	F42H10.9	0.172288	-2.80268	6.03271	0.464581	0.642231	NA
WBGene00197353	12425	T26E3.14	0.172288	-2.80268	6.03271	0.464581	0.642231	NA
WBGene00200223	45113	ZC518.7	0.172288	-2.80268	6.03271	0.464581	0.642231	NA
WBGene00201429	21421	F45H7.14	0.172288	-2.80268	6.03271	0.464581	0.642231	NA
WBGene00020547	18254	srz-7	0.299073	-2.80268	6.03271	0.464581	0.642231	NA
WBGene00006263	27010	str-232	0.301831	-2.80268	6.03271	0.464581	0.642231	NA
WBGene00022421	16150	Y102E9.3	0.333373	-2.80268	6.03271	0.464581	0.642231	NA
WBGene00045117	28432	M163.12	0.390107	-2.80268	6.03271	0.464581	0.642231	NA
WBGene00169634	23439	21ur-13874	0.211185	-2.80268	6.03271	0.464581	0.642231	NA
WBGene00199342	25798	F22B3.15	0.211185	-2.80268	6.03271	0.464581	0.642231	NA
WBGene00022556	23956	ZC204.6	0.406569	-2.80268	6.03271	0.464581	0.642231	NA
WBGene00219887	19938	F09E10.16	0.728738	-2.80268	6.03271	0.464581	0.642231	NA
WBGene00009760	14111	F46B3.7	0.218963	-2.80268	6.03271	0.464581	0.642231	NA
WBGene00016480	23737	srab-7	0.218963	-2.80268	6.03271	0.464581	0.642231	NA
WBGene00202449	26374	C10H11.14	0.218963	-2.80268	6.03271	0.464581	0.642231	NA
WBGene00195413	42422	D1022.11	0.357033	-2.80268	6.03271	0.464581	0.642231	NA
WBGene00005814	22529	srw-67	0.316655	-2.80268	6.03271	0.464581	0.642231	NA
WBGene00045193	17318	F53B2.10	0.316655	-2.80268	6.03271	0.464581	0.642231	NA
WBGene00017917	23792	clec-120	0.326274	-2.80268	6.03271	0.464581	0.642231	NA
WBGene00015447	19681	srab-2	0.414348	-2.80268	6.03271	0.464581	0.642231	NA
WBGene00006239	16527	str-206	0.507213	-2.80268	6.03271	0.464581	0.642231	NA
WBGene00005159	15523	srg-1	0.524357	-2.80268	6.03271	0.464581	0.642231	NA
WBGene00009598	20034	F40G12.3	0.532627	-2.80268	6.03271	0.464581	0.642231	NA
WBGene00165016	16214	21ur-14343	0.272619	-2.80268	6.03271	0.464581	0.642231	NA
WBGene00196702	25316	T12A7.11	0.313567	-2.80268	6.03271	0.464581	0.642231	NA
WBGene00020645	4896	T21D9.2	0.474817	-2.80268	6.03271	0.464581	0.642231	NA
WBGene00047499	19832	21ur-3762	0.576808	-2.80268	6.03271	0.464581	0.642231	NA
WBGene00196787	20329	C14B9.12	0.265638	-2.80268	6.03271	0.464581	0.642231	NA
WBGene00196990	25372	K04A8.14	0.265638	-2.80268	6.03271	0.464581	0.642231	NA
WBGene00006007	13056	srx-116	0.49349	-2.80268	6.03271	0.464581	0.642232	NA
WBGene00006027	23231	srx-136	0.690224	-2.80268	6.03271	0.464581	0.642232	NA
WBGene00004996	23001	spp-11	0.350412	-2.80268	6.03271	0.464581	0.642232	NA
WBGene00005914	16011	srx-23	0.507698	-2.80268	6.03271	0.464581	0.642232	NA
WBGene00005080	13039	srd-2	0.559129	-2.80268	6.03271	0.464581	0.642232	NA
WBGene00198101	25567	F52B5.9	0.747376	-2.80268	6.03271	0.464581	0.642232	NA
WBGene00005394	19985	srh-179	0.651918	-2.80268	6.03271	0.464581	0.642232	NA
WBGene00018058	17718	srbc-1	0.467901	-2.80268	6.03271	0.464581	0.642232	NA
WBGene00195882	11426	F59B10.7	0.845397	-2.80268	6.03271	0.464581	0.642232	NA
WBGene00196500	25282	T11F9.23	0.485836	-2.80266	6.00521	0.466705	0.640711	NA
WBGene00017871	9314	F28A10.3	0.885022	-2.80265	5.99007	0.467883	0.639869	NA
WBGene00005279	16506	srh-56	2.57725	-2.80261	2.61735	1.07078	0.284268	NA
WBGene00018557	21187	srt-38	0.585233	-2.80245	5.77574	0.485211	0.627527	NA
WBGene00199231	19406	C34H3.16	0.599708	-2.8023	5.62401	0.498274	0.618291	NA
WBGene00195242	20279	Y113G7B.28	0.649368	-2.80218	5.51629	0.507984	0.611465	NA
WBGene00047756	14847	21ur-3500	0.69268	-2.80218	5.51417	0.508178	0.611329	NA
WBGene00006015	18536	srx-124	0.692269	-2.80213	5.47191	0.512093	0.608586	NA
WBGene00198842	20376	K07E3.10	0.769868	-2.802	5.36823	0.52196	0.601698	NA
WBGene00015428	21138	C04E7.1	0.856873	-2.8019	5.28305	0.530356	0.595865	NA
WBGene00018815	27827	F54D12.1	0.874034	-2.80177	5.18939	0.539904	0.589263	NA
WBGene00195887	16290	Y47D3A.33	0.894846	-2.80174	5.16415	0.542536	0.587449	NA
WBGene00169680	15380	21ur-5677	0.775768	-2.80168	5.12054	0.547145	0.584279	NA
WBGene00005791	16007	srw-44	0.875534	-2.80162	5.08277	0.5512	0.581496	NA
WBGene00001967	22485	hlh-28	0.827607	-2.80162	5.07837	0.551677	0.58117	NA
WBGene00009147	23343	F26C11.3	0.970084	-2.80147	4.9811	0.562419	0.573831	NA
WBGene00044059	12361	T27C5.12	0.978343	-2.80124	4.84047	0.578713	0.562783	NA
WBGene00017695	13245	fip-1	1.07858	-2.80104	4.72911	0.592298	0.553651	NA
WBGene00198768	18410	T24D5.9	0.719172	-2.80088	4.6455	0.602923	0.54656	NA
WBGene00011982	27210	T24C2.3	0.738641	-2.80073	4.56942	0.612929	0.539923	NA
WBGene00015411	23691	srz-60	0.990077	-2.8006	4.51147	0.620774	0.534748	NA
WBGene00009763	20036	srz-18	1.22943	-2.80027	4.36447	0.641605	0.52113	NA
WBGene00010753	11143	K10G4.4	0.879451	-2.80015	4.31709	0.648619	0.516584	NA
WBGene00007821	8608	clec-201	0.90023	-2.80014	4.31202	0.649379	0.516093	NA
WBGene00219708	15453	linc-13	1.29091	-2.79994	4.23594	0.660997	0.508614	NA
WBGene00017021	2326	D1022.2	1.10305	-2.79988	4.21437	0.664365	0.506457	NA
WBGene00005782	15535	srw-35	0.885978	-2.79987	4.20846	0.665295	0.505862	NA
WBGene00196777	43176	T19A5.13	1.14874	-2.79979	4.18198	0.66949	0.503183	NA
WBGene00011084	15631	srsx-21	1.32567	-2.79963	4.12438	0.6788	0.497264	NA
WBGene00013451	11193	Y67A10A.2	1.29347	-2.79961	4.11715	0.679988	0.496512	NA
WBGene00197025	9449	C14F5.7	1.18691	-2.79935	4.02973	0.694674	0.487259	NA
WBGene00201900	7966	T21C9.17	1.48351	-2.79929	4.01377	0.697422	0.485538	NA
WBGene00049835	21280	21ur-1928	0.785681	-2.79924	3.99502	0.700682	0.483501	NA
WBGene00255584	14965	mir-8187	1.09024	-2.79911	3.95611	0.707541	0.47923	NA
WBGene00007618	6138	C15H11.10	1.1297	-2.79898	3.91651	0.714661	0.474818	NA
WBGene00195238	25041	mir-4805	1.1414	-2.7989	3.89565	0.718469	0.472468	NA
WBGene00012384	23514	Y5F2A.3	1.53156	-2.79873	3.84638	0.727627	0.466842	NA
WBGene00012233	10189	clpr-1	1.39159	-2.79864	3.82213	0.73222	0.464034	NA
WBGene00018322	9322	F41H10.12	1.26643	-2.79855	3.79793	0.736862	0.461206	NA
WBGene00018110	21178	F36H9.1	1.35033	-2.79839	3.75814	0.744622	0.4565	NA
WBGene00022007	21220	mpst-6	0.993223	-2.79809	3.68287	0.759757	0.4474	NA
WBGene00043239	18849	F08D12.5	2.41398	-2.79742	3.53658	0.790994	0.428948	NA
WBGene00020602	16713	T20B12.4	1.86546	-2.79732	3.51738	0.795287	0.426447	NA
WBGene00011421	23474	T04B2.1	1.44811	-2.79731	3.5137	0.796113	0.425966	NA
WBGene00010166	23383	gmd-2	1.42929	-2.79702	3.45783	0.808896	0.418575	NA
WBGene00005500	13548	srh-296	1.2158	-2.79694	3.44243	0.812489	0.416511	NA
WBGene00173233	24900	21ur-6562	0.986891	-2.79693	3.44085	0.812861	0.416298	NA
WBGene00044048	19329	F57G9.7	1.43112	-2.79682	3.42	0.817783	0.413481	NA
WBGene00007401	21531	C07A9.5	1.27243	-2.79679	3.41573	0.818798	0.412902	NA
WBGene00170345	24740	21ur-14817	1.15974	-2.79676	3.40865	0.820488	0.411938	NA
WBGene00016016	10259	C23G10.10	1.80562	-2.79618	3.30979	0.844821	0.398211	NA
WBGene00021668	23932	Y48G1BM.2	2.03937	-2.79377	2.98204	0.936868	0.348826	NA
WBGene00014926	18696	Y57G11C.30	1.49423	-2.79157	2.76434	1.00985	0.312567	NA
WBGene00015845	22700	C16C8.7	2.46377	-2.79139	2.74913	1.01537	0.30993	NA
WBGene00010863	12630	M04D8.5	2.26169	-2.79094	2.71225	1.02901	0.303474	NA
WBGene00047167	29995	21ur-3130	2.23173	-2.78929	2.59125	1.07643	0.281736	NA
WBGene00005142	10547	srd-65	5.49647	-2.7882	2.52129	1.10586	0.268787	0.508082
WBGene00019112	5851	F59E11.6	3.9321	-2.78123	1.58855	1.75079	0.0799815	0.24939
WBGene00219687	13456	linc-12	3.57969	-2.78006	2.16063	1.28669	0.198202	0.428365
WBGene00219280	18939	C05B5.16	0.957783	-2.77702	5.71369	0.48603	0.626946	NA
WBGene00012108	17625	T28A8.2	3.23848	-2.7739	2.04476	1.35659	0.174911	0.39694
WBGene00012450	22125	Y17D7B.2	37.3404	-2.77362	0.678548	4.08757	4.35909e-05	0.000647668
WBGene00018477	23816	otpl-4	1.83813	-2.76736	3.64927	0.758332	0.448252	NA
WBGene00023230	28182	BE0003N10.t4	0.121902	-2.76187	6.03512	0.457633	0.647216	NA
WBGene00173441	40891	21ur-6949	0.121902	-2.76187	6.03512	0.457633	0.647216	NA
WBGene00197723	43708	Y69A2AR.39	0.121902	-2.76187	6.03512	0.457633	0.647216	NA
WBGene00200878	26100	Y47G6A.35	0.121902	-2.76187	6.03512	0.457633	0.647216	NA
WBGene00220144	46684	Y39A1A.30	0.121902	-2.76187	6.03512	0.457633	0.647216	NA
WBGene00199020	10444	Y48A6B.16	0.285716	-2.76187	6.03512	0.457633	0.647216	NA
WBGene00016433	23731	C35B1.3	0.170749	-2.76187	6.03512	0.457633	0.647216	NA
WBGene00047879	20185	21ur-742	0.182372	-2.76187	6.03512	0.457633	0.647216	NA
WBGene00200954	26114	C37E2.8	0.268441	-2.76187	6.03512	0.457633	0.647216	NA
WBGene00005469	23107	srh-263	0.336525	-2.76187	6.03512	0.457633	0.647216	NA
WBGene00005708	20487	sru-45	0.369506	-2.76187	6.03512	0.457633	0.647216	NA
WBGene00018912	27838	F56A4.4	0.285041	-2.76187	6.03512	0.457633	0.647216	NA
WBGene00021566	23924	Y45G12C.3	0.285041	-2.76187	6.03512	0.457633	0.647216	NA
WBGene00198847	12932	F49E2.8	0.368934	-2.76187	6.03512	0.457633	0.647216	NA
WBGene00198670	22416	F14F3.11	0.328255	-2.76187	6.03512	0.457633	0.647216	NA
WBGene00197005	43287	K02A11.6	0.349138	-2.76187	6.03512	0.457633	0.647216	NA
WBGene00044962	28379	F28D1.13	0.490689	-2.76187	5.98333	0.461594	0.644372	NA
WBGene00170615	17344	21ur-15001	0.471435	-2.76187	5.97751	0.462043	0.64405	NA
WBGene00201060	45593	K10G6.7	0.168578	-2.76187	6.03512	0.457633	0.647216	NA
WBGene00201570	20892	F09E5.22	0.315791	-2.76187	6.03512	0.457633	0.647216	NA
WBGene00235367	19951	F49F1.17	0.264774	-2.76187	6.03512	0.457633	0.647216	NA
WBGene00235329	20947	F37B4.15	0.275722	-2.76187	6.03512	0.457633	0.647216	NA
WBGene00048349	17322	21ur-296	0.33866	-2.76187	6.03512	0.457633	0.647216	NA
WBGene00196583	18386	R13A1.14	0.489583	-2.76187	5.99439	0.460742	0.644984	NA
WBGene00173902	41291	21ur-6089	0.499283	-2.76184	4.95559	0.557319	0.577309	NA
WBGene00197630	13920	AH10.8	0.662029	-2.76184	4.74041	0.582616	0.560152	NA
WBGene00198692	22908	C09H10.13	0.579556	-2.76183	4.70188	0.587389	0.556943	NA
WBGene00048676	24319	21ur-4385	0.670595	-2.76183	4.61778	0.598085	0.549783	NA
WBGene00201181	13941	C16C2.9	0.650258	-2.76183	4.51525	0.611666	0.540759	NA
WBGene00171041	38794	21ur-12950	0.928837	-2.76181	4.2762	0.645857	0.518372	NA
WBGene00044000	17301	Y75B8A.41	1.03124	-2.7618	4.22698	0.653376	0.513514	NA
WBGene00168952	36971	21ur-11082	0.621891	-2.7618	4.14687	0.665997	0.505413	NA
WBGene00255579	19454	mir-8194	0.911985	-2.7618	4.10067	0.673499	0.50063	NA
WBGene00014542	23621	W04G5.11	1.45351	-2.76179	4.02845	0.685573	0.492983	NA
WBGene00201967	21430	F17E5.6	1.32677	-2.76178	3.92668	0.703338	0.481845	NA
WBGene00194656	42284	T05F1.15	0.745001	-2.76178	3.88302	0.711245	0.476932	NA
WBGene00045646	13873	21ur-4784	0.926616	-2.76169	3.26361	0.846208	0.397437	NA
WBGene00048104	12388	21ur-4875	0.937876	-2.76169	3.23971	0.852449	0.393965	NA
WBGene00005848	23187	srw-101	0.953694	-2.75975	5.5768	0.494864	0.620696	NA
WBGene00007682	13591	C18D11.6	9.27495	-2.75326	0.936735	2.93921	0.00329049	0.0258383
WBGene00010586	13128	K05C4.10	2.15859	-2.73417	2.55772	1.06899	0.285075	NA
WBGene00044932	16174	Y37E3.22	1.59552	-2.73075	2.8251	0.966601	0.333743	NA
WBGene00010761	13130	K10H10.5	2.82708	-2.72975	2.92369	0.933664	0.350477	NA
WBGene00077523	17860	C23H5.12	1.57685	-2.72898	3.00922	0.906872	0.364475	NA
WBGene00020641	12319	fbxa-68	2.43384	-2.72862	3.05132	0.894243	0.371192	NA
WBGene00015242	21135	B0524.3	1.41822	-2.72769	3.17342	0.859542	0.390042	NA
WBGene00007364	20019	stdh-3	1.46192	-2.72767	3.17645	0.858716	0.390497	NA
WBGene00008618	20026	fbxa-45	1.56159	-2.72703	3.27147	0.833577	0.404519	NA
WBGene00006953	5100	wrt-7	1.82485	-2.727	3.27514	0.832636	0.40505	NA
WBGene00008374	19585	clec-220	2.07534	-2.72697	3.28006	0.831378	0.40576	NA
WBGene00023274	20147	F23C8.10	1.21134	-2.72691	3.289	0.829101	0.407047	NA
WBGene00015380	7259	C03B1.10	0.984769	-2.72674	3.31577	0.822357	0.410874	NA
WBGene00020227	23875	T05A8.1	1.43643	-2.7265	3.35564	0.812513	0.416498	NA
WBGene00005664	17028	sru-1	2.23283	-2.72645	3.36452	0.810352	0.417738	NA
WBGene00011024	22622	R05A10.7	1.76781	-2.72611	3.42371	0.796247	0.425889	NA
WBGene00255420	14964	Y51F10.15	2.36972	-2.72599	3.44555	0.791162	0.428849	NA
WBGene00235287	16955	Y55F3C.17	1.64645	-2.72576	3.48916	0.781209	0.43468	NA
WBGene00013798	16083	clec-195	1.06518	-2.72503	3.63945	0.748748	0.454009	NA
WBGene00005692	22524	sru-29	1.74651	-2.72479	2.8331	0.96177	0.336165	NA
WBGene00006077	19543	str-9	1.15041	-2.72464	3.72971	0.730523	0.465071	NA
WBGene00200423	12438	T11F9.27	0.807732	-2.7246	3.73988	0.728526	0.466292	NA
WBGene00005964	14539	srx-73	1.18939	-2.72417	3.84861	0.707832	0.47905	NA
WBGene00008961	21564	F19H6.6	1.13232	-2.7233	4.1062	0.663215	0.507193	NA
WBGene00022869	17293	ZK1240.4	1.12608	-2.72323	4.12838	0.659635	0.509488	NA
WBGene00005431	16511	srh-221	1.1375	-2.72307	4.18109	0.651283	0.514864	NA
WBGene00006285	23272	str-259	1.47905	-2.72303	4.19333	0.649373	0.516097	NA
WBGene00019575	9846	K09E3.4	0.808788	-2.72288	4.24752	0.641052	0.521489	NA
WBGene00017581	19223	F18G5.5	1.02901	-2.72277	4.28728	0.635083	0.525374	NA
WBGene00010021	23378	srbc-49	1.14717	-2.72265	4.33549	0.627992	0.530009	NA
WBGene00006139	23246	str-79	1.52737	-2.7226	4.35614	0.625003	0.531969	NA
WBGene00016297	21680	fbxc-15	1.12882	-2.72255	4.37478	0.62233	0.533725	NA
WBGene00006093	23234	str-27	0.882986	-2.72249	4.40127	0.618569	0.536201	NA
WBGene00196470	25279	R05D3.13	0.699437	-2.72199	4.62046	0.589115	0.555784	NA
WBGene00001720	17491	grl-11	0.994988	-2.72182	4.70192	0.578875	0.562674	NA
WBGene00005326	23062	srh-107	1.27765	-2.72172	4.75324	0.572604	0.566913	NA
WBGene00022315	21772	Y81B9A.1	1.10434	-2.72165	4.78884	0.568332	0.569809	NA
WBGene00009707	15107	srxa-16	1.08294	-2.72147	4.88908	0.556643	0.577771	NA
WBGene00006178	26984	str-129	0.975675	-2.72142	4.91766	0.553398	0.579991	NA
WBGene00005562	26701	sri-50	1.02841	-2.72129	4.99775	0.544502	0.586096	NA
WBGene00005399	21008	srh-184	0.925086	-2.72103	5.16451	0.526871	0.598283	NA
WBGene00020520	15796	T15B7.8	0.781511	-2.72103	5.16655	0.526663	0.598428	NA
WBGene00005247	23046	srh-22	0.777958	-2.72086	5.28069	0.515247	0.606381	NA
WBGene00005886	16520	srw-139	0.738416	-2.72086	5.2848	0.514846	0.606661	NA
WBGene00010929	23454	srt-45	0.690582	-2.72063	5.45713	0.498546	0.618099	NA
WBGene00189955	42279	F40G9.19	0.74244	-2.72061	5.4692	0.497442	0.618877	NA
WBGene00172830	24879	21ur-10246	0.601291	-2.72052	5.55013	0.490171	0.624013	NA
WBGene00005753	21020	srw-6	0.625232	-2.72047	5.58659	0.486965	0.626283	NA
WBGene00219410	19928	C04C3.14	3.16193	-2.72045	5.60536	0.48533	0.627442	NA
WBGene00019685	21201	K12H6.5	0.586808	-2.72038	5.66626	0.480102	0.631155	NA
WBGene00005841	97	srw-94	0.606133	-2.72037	5.67743	0.479155	0.631828	NA
WBGene00016804	23753	C50C3.12	0.994689	-2.72036	5.68948	0.478138	0.632552	NA
WBGene00044416	28330	C08E3.15	0.937826	-2.72035	5.70023	0.477235	0.633195	NA
WBGene00017619	14731	F20A1.8	0.894157	-2.72027	5.76801	0.471613	0.637203	NA
WBGene00201070	45600	F25H10.9	0.479024	-2.72013	5.90162	0.460913	0.644861	NA
WBGene00005751	16518	srw-4	0.899102	-2.72007	5.97366	0.455344	0.648862	NA
WBGene00010927	27165	clec-259	0.929099	-2.72001	6.03526	0.450687	0.652215	NA
WBGene00005055	23007	sra-29	0.118192	-2.72001	6.03766	0.450507	0.652345	NA
WBGene00005075	23013	srb-10	0.118192	-2.72001	6.03766	0.450507	0.652345	NA
WBGene00005115	23019	srd-37	0.118192	-2.72001	6.03766	0.450507	0.652345	NA
WBGene00005301	26628	srh-80	0.118192	-2.72001	6.03766	0.450507	0.652345	NA
WBGene00005319	26633	srh-100	0.118192	-2.72001	6.03766	0.450507	0.652345	NA
WBGene00005443	26668	srh-236	0.118192	-2.72001	6.03766	0.450507	0.652345	NA
WBGene00005448	26670	srh-241	0.118192	-2.72001	6.03766	0.450507	0.652345	NA
WBGene00005590	23132	sri-78	0.118192	-2.72001	6.03766	0.450507	0.652345	NA
WBGene00005785	26759	srw-38	0.118192	-2.72001	6.03766	0.450507	0.652345	NA
WBGene00005963	14055	srx-72	0.118192	-2.72001	6.03766	0.450507	0.652345	NA
WBGene00006018	23228	srx-127	0.118192	-2.72001	6.03766	0.450507	0.652345	NA
WBGene00006144	26974	str-85	0.118192	-2.72001	6.03766	0.450507	0.652345	NA
WBGene00007893	21544	C33B4.5	0.118192	-2.72001	6.03766	0.450507	0.652345	NA
WBGene00009762	27120	F46B3.9	0.118192	-2.72001	6.03766	0.450507	0.652345	NA
WBGene00010598	27155	K06B4.3	0.118192	-2.72001	6.03766	0.450507	0.652345	NA
WBGene00011784	27202	T15D6.10	0.118192	-2.72001	6.03766	0.450507	0.652345	NA
WBGene00013528	27276	Y73F8A.23	0.118192	-2.72001	6.03766	0.450507	0.652345	NA
WBGene00014038	27300	ZK643.7	0.118192	-2.72001	6.03766	0.450507	0.652345	NA
WBGene00015316	27703	srbc-30	0.118192	-2.72001	6.03766	0.450507	0.652345	NA
WBGene00015761	23703	C14C6.7	0.118192	-2.72001	6.03766	0.450507	0.652345	NA
WBGene00017202	27772	clec-46	0.118192	-2.72001	6.03766	0.450507	0.652345	NA
WBGene00017652	23784	F21C10.1	0.118192	-2.72001	6.03766	0.450507	0.652345	NA
WBGene00018388	23808	F43C11.11	0.118192	-2.72001	6.03766	0.450507	0.652345	NA
WBGene00020623	27890	srab-21	0.118192	-2.72001	6.03766	0.450507	0.652345	NA
WBGene00021138	23904	clec-127	0.118192	-2.72001	6.03766	0.450507	0.652345	NA
WBGene00044133	18307	C44C10.12	0.118192	-2.72001	6.03766	0.450507	0.652345	NA
WBGene00044179	21249	C30G7.5	0.118192	-2.72001	6.03766	0.450507	0.652345	NA
WBGene00044246	24063	F36D1.10	0.118192	-2.72001	6.03766	0.450507	0.652345	NA
WBGene00044706	28345	Y26D4A.15	0.118192	-2.72001	6.03766	0.450507	0.652345	NA
WBGene00045122	24115	F22B3.10	0.118192	-2.72001	6.03766	0.450507	0.652345	NA
WBGene00045654	28642	21ur-3621	0.118192	-2.72001	6.03766	0.450507	0.652345	NA
WBGene00047184	24243	21ur-1259	0.118192	-2.72001	6.03766	0.450507	0.652345	NA
WBGene00048299	31007	21ur-2429	0.118192	-2.72001	6.03766	0.450507	0.652345	NA
WBGene00048305	31012	21ur-1655	0.118192	-2.72001	6.03766	0.450507	0.652345	NA
WBGene00048520	31203	21ur-2692	0.118192	-2.72001	6.03766	0.450507	0.652345	NA
WBGene00048551	31231	21ur-2983	0.118192	-2.72001	6.03766	0.450507	0.652345	NA
WBGene00049252	31860	21ur-5230	0.118192	-2.72001	6.03766	0.450507	0.652345	NA
WBGene00049699	32258	21ur-3221	0.118192	-2.72001	6.03766	0.450507	0.652345	NA
WBGene00049915	32460	21ur-1804	0.118192	-2.72001	6.03766	0.450507	0.652345	NA
WBGene00050335	32841	21ur-2763	0.118192	-2.72001	6.03766	0.450507	0.652345	NA
WBGene00077467	33362	rrn-4.4	0.118192	-2.72001	6.03766	0.450507	0.652345	NA
WBGene00165497	33897	21ur-7295	0.118192	-2.72001	6.03766	0.450507	0.652345	NA
WBGene00169238	37218	21ur-6757	0.118192	-2.72001	6.03766	0.450507	0.652345	NA
WBGene00169802	37707	21ur-13844	0.118192	-2.72001	6.03766	0.450507	0.652345	NA
WBGene00170281	38128	21ur-5914	0.118192	-2.72001	6.03766	0.450507	0.652345	NA
WBGene00170966	24763	21ur-9548	0.118192	-2.72001	6.03766	0.450507	0.652345	NA
WBGene00171017	38772	21ur-7862	0.118192	-2.72001	6.03766	0.450507	0.652345	NA
WBGene00171621	39307	21ur-15078	0.118192	-2.72001	6.03766	0.450507	0.652345	NA
WBGene00172024	39654	21ur-11493	0.118192	-2.72001	6.03766	0.450507	0.652345	NA
WBGene00172042	24822	21ur-7508	0.118192	-2.72001	6.03766	0.450507	0.652345	NA
WBGene00172218	39822	21ur-14358	0.118192	-2.72001	6.03766	0.450507	0.652345	NA
[truncated: 9,839 more rows]
