# Supplementary material for: Metabolic signaling controls intergenerational adaptive responses via peroxisomal catabolism
Source: Research Square preprint supplement (doi:10.21203/rs.3.rs-6522513/v1), 2026-02-20
Supplement: Supplementary file 2 [file b1f564810228d30f35d5bfe0.xlsx]

## Sheet: Up-regulated genes after CS
Table S1. Genes involved in lipid metabolism up-regulated in sgk-1(lf) compared to wild type following CS.
	sgk-1(lf) CS vs WT CS
symbol	log2FoldChange	padj	ChIP-seq peak	within 500 bp upstream TSS	within 1000 bp upstream TSS	Description
lipl-4	3.33465	4.74599e-09	Yes	x		Enables triglyceride lipase activity. Involved in cellular lipid metabolic process; determination of adult lifespan; and positive regulation of macroautophagy. Located in lysosome. Expressed in intestine and seam cell. Human ortholog(s) of this gene implicated in Wolman disease; autosomal recessive congenital ichthyosis 8; and cholesterol ester storage disease. Is an ortholog of several human gen…
fat-5	2.87663	2.03174e-07	No			Predicted to enable iron ion binding activity and stearoyl-CoA 9-desaturase activity. Involved in long-chain fatty acid biosynthetic process and post-embryonic development. Predicted to be located in endoplasmic reticulum membrane. Expressed in intestine and tail. Human ortholog(s) of this gene implicated in autosomal dominant nonsyndromic deafness 79. Is an ortholog of human SCD (stearoyl-CoA de…
fat-7	2.73252	7.69951e-16	No			Enables stearoyl-CoA 9-desaturase activity. Involved in fatty acid biosynthetic process and post-embryonic development. Acts upstream of or within cellular oxygen homeostasis and response to hypoxia. Predicted to be located in endoplasmic reticulum membrane. Expressed in intestinal cell. Human ortholog(s) of this gene implicated in autosomal dominant nonsyndromic deafness 79. Is an ortholog of hu…
lpr-6	2.53564	3.18043e-06	No			Predicted to be involved in lipid transport. Predicted to be located in extracellular region. Expressed in amphid neurons.
F25A2.1	2.4883	8.21342e-07	Yes	x		Predicted to be involved in lipid metabolic process.
Y54G2A.45	2.41359	8.00388e-29	Yes	x		Predicted to be involved in lipid metabolic process.
C40H1.8	2.29731	3.24312e-13	Yes	x		Predicted to be involved in lipid metabolic process.
cgt-1	2.2508	5.205e-10	Yes	x		Predicted to enable ceramide glucosyltransferase activity. Involved in glucosylceramide biosynthetic process; nematode larval development; and regulation of protein localization to basolateral plasma membrane. Predicted to be located in membrane. Expressed in several structures, including excretory system; pharyngeal muscle cell; pharyngeal-intestinal valve; rectal gland cell; and rectal valve ce…
ech-9	2.23517	5.7375e-09	Yes	x	x	Predicted to enable 3-hydroxyacyl-CoA dehydrogenase activity. Predicted to be involved in fatty acid beta-oxidation. Predicted to be located in peroxisome. Human ortholog(s) of this gene implicated in Fanconi renotubular syndrome 3. Is an ortholog of human EHHADH (enoyl-CoA hydratase and 3-hydroxyacyl CoA dehydrogenase).
lpr-4	1.93068	5.73027e-05	No			Predicted to be involved in lipid transport. Predicted to be located in extracellular region. Expressed in body wall musculature and muscle cell.
elo-8	1.87204	0.00138838	No			Predicted to enable fatty acid elongase activity. Predicted to be involved in fatty acid biosynthetic process and sphingolipid biosynthetic process. Predicted to be located in endoplasmic reticulum membrane.
ttm-5	1.59336	7.06476e-08	Yes	x		Predicted to enable sphingolipid delta-4 desaturase activity. Predicted to be involved in ceramide biosynthetic process. Predicted to be located in membrane. Human ortholog(s) of this gene implicated in hypomyelinating leukodystrophy. Is an ortholog of human DEGS1 (delta 4-desaturase, sphingolipid 1) and DEGS2 (delta 4-desaturase, sphingolipid 2).
dgat-2	1.4949	2.50225e-09	Yes		x	Predicted to enable diacylglycerol O-acyltransferase activity. Predicted to be involved in triglyceride biosynthetic process. Located in lipid droplet. Is an ortholog of human MOGAT1 (monoacylglycerol O-acyltransferase 1).
strm-1	1.43332	0.00143822	Yes		x	Enables S-adenosylmethionine-dependent methyltransferase activity. Involved in macromolecule methylation and regulation of dauer larval development. Predicted to be located in endoplasmic reticulum. Expressed in hypodermis and pharynx.
sptl-2	1.25955	1.63781e-09	No	x		Predicted to enable serine C-palmitoyltransferase activity. Predicted to be involved in ceramide biosynthetic process and sphingosine biosynthetic process. Predicted to be part of serine C-palmitoyltransferase complex. Human ortholog(s) of this gene implicated in hereditary sensory and autonomic neuropathy type 1C. Is an ortholog of human SPTLC2 (serine palmitoyltransferase long chain base subuni…
B0035.13	1.21777	0.00273178	Yes	x		Predicted to be involved in lipid metabolic process
Y55D5A.3	1.18833	0.00192364	Yes			Predicted to enable fatty acid amide hydrolase activity. Predicted to be involved in N-acylethanolamine metabolic process and fatty acid metabolic process. Predicted to be located in lysosome. Predicted to be extrinsic component of membrane. Is an ortholog of human NAAA (N-acylethanolamine acid amidase).
Y54F10AM.8	1.07842	2.24092e-11	No	x		Predicted to enable phospholipase activity. Predicted to be involved in phospholipid catabolic process. Predicted to be located in extracellular region. Is an ortholog of human PLBD2 (phospholipase B domain containing 2).
ceeh-1	1.07443	2.62764e-12	Yes	x	x	Enables epoxide hydrolase activity. Involved in cellular lipid metabolic process. Predicted to be located in membrane. Is an ortholog of human EPHX3 (epoxide hydrolase 3) and EPHX4 (epoxide hydrolase 4).

## Sheet: Down-regulated genes after CS
Table S1. Genes involved in lipid metabolism down-regulated in sgk-1(lf) compared to wild type following CS.
	sgk-1(lf) CS vs WT CS
symbol	log2FoldChange	padj	ChIP-seq peak	within 500 bp upstream TSS	within 1000 bp upstream TSS	Description
Y46H3A.5	-7.68754	4.77599e-138	No			Predicted to be involved in lipid metabolic process.
asm-3	-5.14217	7.37059e-63	Yes	x		Predicted to enable acid sphingomyelin phosphodiesterase activity. Involved in lipid droplet disassembly. Predicted to be located in extracellular region and lysosome. Human ortholog(s) of this gene implicated in Niemann-Pick disease type A and Niemann-Pick disease type B. Is an ortholog of human SMPD1 (sphingomyelin phosphodiesterase 1).
gba-4	-3.34029	1.98581e-07	Yes	x		Predicted to enable glucosylceramidase activity. Predicted to be involved in glucosylceramide catabolic process. Human ortholog(s) of this gene implicated in several diseases, including Gaucher's disease (multiple); Lewy body dementia; and Netherton syndrome. Is an ortholog of human GBA1 (glucosylceramidase beta 1).
vit-1	-3.27909	1.4747e-11				Predicted to enable lipid transporter activity. Predicted to be involved in lipid transport. Predicted to be located in extracellular region.
w03f9.4	-2.80318	2.06793e-10	Yes	x		Predicted to enable hydrolase activity, acting on ester bonds. Involved in defense response to Gram-negative bacterium; lipid homeostasis; and triglyceride catabolic process. Located in lysosome. Expressed in coelomocyte and intestine. Human ortholog(s) of this gene implicated in Wolman disease; autosomal recessive congenital ichthyosis 8; and cholesterol ester storage disease. Is an ortholog of …
lipl-5	-2.31908	5.79636e-12	No			Predicted to enable hydrolase activity. Predicted to be involved in lipid catabolic process.
vit-3	-2.30273	1.0513e-06				Predicted to enable lipid transporter activity. Predicted to be involved in lipid transport. Predicted to be located in extracellular region. Expressed in intestine.
K03H6.2 (txt-4)	-2.22291	3.08936e-34	Yes	x		Predicted to be involved in lipid metabolic process.
zc247.1	-2.02826	1.63827e-06	No			Predicted to enable lipid transporter activity. Predicted to be involved in lipid transport. Predicted to be located in extracellular region.
K05B2.4	-1.85289	4.04115e-21		x		Enables epoxide hydrolase activity. Involved in cellular lipid metabolic process. Is an ortholog of human EPHX3 (epoxide hydrolase 3) and EPHX4 (epoxide hydrolase 4).
acs-3	-1.65115	1.04214e-43	Yes	x		Predicted to be involved in lipid metabolic process.
vit-4	-1.39609	0.000461733	Yes	x		Predicted to enable acyl-CoA hydrolase activity. Predicted to be involved in acyl-CoA metabolic process and fatty acid metabolic process. Predicted to be located in cytoplasm. Human ortholog(s) of this gene implicated in disease of metabolism. Is an ortholog of several human genes including ACOT2 (acyl-CoA thioesterase 2); ACOT4 (acyl-CoA thioesterase 4); and BAAT (bile acid-CoA:amino acid N-acyl…
pks-1	-1.18611	0.00014676	No			Predicted to enable fatty acid synthase activity. Predicted to be involved in fatty acid biosynthetic process. Expressed in CANL and CANR.
acox-3	-1.08675	4.01919e-25	Yes	x		Predicted to enable fatty acid binding activity; flavin adenine dinucleotide binding activity; and pristanoyl-CoA oxidase activity. Involved in ascaroside biosynthetic process. Located in peroxisome. Expressed in intestinal cell. Is an ortholog of human ACOX3 (acyl-CoA oxidase 3, pristanoyl).
ceeh-2	-1.08301	5.60433e-13	Yes	x		Enables epoxide hydrolase activity. Involved in cellular lipid metabolic process. Is an ortholog of human EPHX3 (epoxide hydrolase 3) and EPHX4 (epoxide hydrolase 4).
Y49E10.18	-1.04824	1.48394e-09	Yes	x		Predicted to be involved in lipid metabolic process.
C31H5.6	-1.03305	1.13742e-23	Yes	x		Predicted to enable fatty acyl-CoA hydrolase activity. Predicted to be involved in acyl-CoA metabolic process and fatty acid metabolic process. Human ortholog(s) of this gene implicated in disease of metabolism. Is an ortholog of several human genes including ACOT2 (acyl-CoA thioesterase 2); ACOT4 (acyl-CoA thioesterase 4); and BAAT (bile acid-CoA:amino acid N-acyltransferase).
