# Supplementary material for: Metabolic signaling controls intergenerational adaptive responses via peroxisomal catabolism
Source: Research Square preprint supplement (doi:10.21203/rs.3.rs-6522513/v1), 2026-02-20
Supplement: Supplementary file 3 [file c3af8c055518df9f97e0b2b1.xlsx]

## Sheet: Total gene expression changes
Table S3. Total gene expression changes in sgk-1(lf) compared to wild type without CS.
gene_id	entrezid	symbol	baseMean	log2FoldChange	lfcSE	stat	pvalue	padj
WBGene00021233	2414	Y19D10B.4	26.472	-10.114	2.53622	3.98783	6.66804e-05	0.00155381
WBGene00021230	23912	Y19D10B.1	4.14754	-7.27394	5.95247	1.222	0.221706	0.594886
WBGene00016483	2309	C36C5.14	11.4537	-7.26272	1.64869	4.40516	1.05706e-05	0.000307711
WBGene00015108	22183	B0281.1	2.84956	-6.643	2.60624	2.54888	0.0108069	0.0919995
WBGene00009689	15106	F44E5.2	12.6835	-6.59666	1.66311	3.96645	7.29517e-05	0.00167697
WBGene00017019	20570	D1014.6	19.0258	-6.49666	1.74947	3.71351	0.000204404	0.00400299
WBGene00010071	12121	sre-45	3.05968	-6.33731	2.26673	2.79579	0.00517725	0.0544014
WBGene00013179	23546	clec-100	4.07855	-5.98008	1.90583	3.13779	0.00170226	0.0228285
WBGene00008556	3155	F07D3.3	7.5319	-5.93077	1.79186	3.30984	0.000933481	0.0141276
WBGene00016484	17198	C36C5.15	4.73449	-5.79134	2.44816	2.36559	0.0180013	0.132324
WBGene00003538	26554	nas-19	4.21675	-5.78421	2.07198	2.79163	0.00524437	0.0548854
WBGene00010245	209	F58D5.6	11.5103	-5.70527	1.64398	3.47039	0.000519696	0.00875045
WBGene00005256	7067	srh-33	3.85295	-5.70465	2.27925	2.50286	0.0123195	0.100742
WBGene00016183	2822	C28F5.1	3.78783	-5.65978	1.92655	2.93778	0.00330569	0.0386518
WBGene00008297	17069	cdr-3	2.47886	-5.59024	2.61285	2.13952	0.0323937	0.196445
WBGene00077557	18877	F15D3.9	5.56844	-5.47521	1.79368	3.0525	0.00226941	0.028966
WBGene00007895	18565	C33D3.4	1.54568	-5.47428	4.90141	1.11688	0.264046	NA
WBGene00020900	16721	T28F2.1	3.44618	-5.41861	2.37071	2.28565	0.0222747	0.152895
WBGene00021837	10851	Y54E10BL.1	4.8442	-5.39629	1.96698	2.74344	0.00607985	0.0609052
WBGene00255605	15966	T23B3.8	7.07434	-5.34873	1.71968	3.11031	0.00186891	0.0246113
WBGene00007265	15059	C02F4.5	1.87224	-5.34312	2.74	1.95004	0.051171	NA
WBGene00009859	21079	clec-33	4.00598	-5.30888	2.56777	2.0675	0.0386866	0.219903
WBGene00012046	5216	T26E4.4	1.88457	-5.28028	3.72883	1.41607	0.156756	NA
WBGene00012174	9704	W01B6.8	3.55799	-5.27357	2.24398	2.3501	0.0187686	0.136014
WBGene00219693	17440	linc-144	3.37508	-5.25498	2.77885	1.89106	0.0586157	0.284158
WBGene00015712	5770	sre-11	2.24318	-5.25421	2.65997	1.97529	0.0482354	NA
WBGene00007905	22569	C33G3.5	2.97591	-5.22318	2.49686	2.0919	0.0364477	0.211255
WBGene00018096	11264	clec-207	3.25125	-5.21809	2.73175	1.91017	0.0561117	0.276579
WBGene00007699	22563	C24H11.1	3.90927	-5.19946	2.17422	2.39141	0.0167836	0.126271
WBGene00021907	14805	Y55B1AR.3	5.37374	-5.16303	1.80913	2.85388	0.0043189	0.0475444
WBGene00016852	12736	srt-7	5.75199	-5.16285	1.84593	2.79688	0.00515994	0.0542507
WBGene00195227	22398	Y71A12B.23	8.4774	-5.16254	1.92474	2.6822	0.00731403	0.0695899
WBGene00020014	23868	R11G11.6	7.41889	-5.16187	2.24638	2.29786	0.0215698	0.149921
WBGene00008804	18080	acp-4	4.36836	-5.1618	2.30571	2.2387	0.0251752	0.166908
WBGene00020750	15292	nhr-222	2.28706	-5.16137	2.94837	1.75058	0.0800175	NA
WBGene00201134	19917	H32K16.3	1.25239	-5.13535	3.30067	1.55585	0.119744	NA
WBGene00014070	13194	srxa-9	2.10622	-5.11098	3.32686	1.53628	0.12447	NA
WBGene00077682	10902	F58B4.7	6.22372	-5.08984	1.81835	2.79915	0.00512374	0.0539904
WBGene00013061	21113	Y51A2A.5	3.85547	-5.08222	1.92366	2.64195	0.0082429	0.0754511
WBGene00196071	13911	F56F3.8	1.67958	-5.0813	4.19619	1.21093	0.225922	NA
WBGene00013930	17656	clec-96	2.44121	-5.0644	2.59022	1.9552	0.0505595	0.260681
WBGene00010543	10641	K03H1.8	1.89831	-5.05988	3.1593	1.60159	0.109247	NA
WBGene00220046	19942	R31.7	5.21493	-5.00721	1.8771	2.66752	0.00764125	0.0716323
WBGene00005353	19983	srh-136	1.3821	-5.00372	3.65165	1.37026	0.170604	NA
WBGene00010932	16055	M162.6	1.52355	-5.00203	3.31391	1.50941	0.131195	NA
WBGene00021967	15320	Y57G7A.3	5.25732	-4.99553	1.96305	2.54477	0.0109349	0.092499
WBGene00044392	8423	C25H3.16	6.63591	-4.9806	2.10325	2.36805	0.0178823	0.131608
WBGene00003099	8031	lys-10	2.03409	-4.95678	2.82077	1.75725	0.078876	NA
WBGene00006135	23243	str-74	1.93993	-4.95346	3.03057	1.6345	0.102155	NA
WBGene00010570	8168	K04G11.1	1.65117	-4.95186	3.15699	1.56854	0.116755	NA
WBGene00011313	15139	T01B7.8	7.6252	-4.94582	1.74997	2.82623	0.00470993	0.0508071
WBGene00018378	7832	F43C11.1	2.40466	-4.94026	5.94615	0.830834	0.406067	0.777141
WBGene00005334	23066	srh-115	1.01416	-4.8892	5.50993	0.887343	0.374894	NA
WBGene00018322	9322	F41H10.12	1.26643	-4.88812	3.69729	1.32208	0.186141	NA
WBGene00235285	19449	F56D6.18	1.72946	-4.88424	2.39618	2.03834	0.0415155	NA
WBGene00017497	16678	irld-32	7.938	-4.88063	1.65289	2.95278	0.00314928	0.0372043
WBGene00195363	18381	M01H9.6	3.32535	-4.88059	2.05847	2.37098	0.017741	0.130938
WBGene00077574	33398	T08G5.16	4.97438	-4.87524	1.83584	2.65559	0.00791689	0.0733126
WBGene00044391	18311	C25H3.15	9.00956	-4.87412	1.80619	2.69857	0.00696391	0.0674657
WBGene00010832	17605	M02G9.3	17.9177	-4.86633	1.67095	2.91231	0.00358766	0.0412095
WBGene00011721	5205	T11G6.7	4.67225	-4.84	2.04961	2.36143	0.0182048	0.133176
WBGene00022710	10872	ZK354.9	1.72593	-4.80024	3.25829	1.47324	0.140686	NA
WBGene00022699	9902	ZK353.3	10.0334	-4.79423	1.78693	2.68294	0.00729774	0.0695557
WBGene00005002	2089	spp-17	9517.56	-4.7942	0.252574	18.9814	2.43086e-80	7.39468e-77
WBGene00017498	12749	pud-4	896.194	-4.78741	0.165495	28.9279	5.33032e-184	4.86445e-180
WBGene00004877	21497	smf-2	2.0269	-4.78306	2.49181	1.91952	0.054919	NA
WBGene00044476	17309	F56D6.14	5.74265	-4.781	2.01436	2.37346	0.0176222	0.130536
WBGene00016950	5312	C55C2.4	4.27951	-4.77665	2.15034	2.22135	0.0263272	0.171984
WBGene00012266	18653	W04G5.5	2.11208	-4.77014	2.5081	1.90189	0.0571849	NA
WBGene00201523	12943	M01A8.3	2.90905	-4.76907	2.60139	1.83328	0.066761	0.30823
WBGene00010761	13130	K10H10.5	2.82708	-4.76739	2.78685	1.71067	0.0871414	0.363046
WBGene00195978	21339	VB0395L.2	1.12365	-4.76589	3.00908	1.58384	0.113231	NA
WBGene00165122	14376	21ur-7774	0.963443	-4.76377	3.49872	1.36157	0.173333	NA
WBGene00013939	23574	ZK218.5	1.33855	-4.76272	3.88293	1.22658	0.219981	NA
WBGene00047823	21273	21ur-5134	1.18432	-4.76036	5.97214	0.797093	0.425397	NA
WBGene00044569	18317	C25F6.8	44.1867	-4.76011	1.65049	2.88405	0.00392591	0.0441773
WBGene00017501	5324	pud-3	5634.83	-4.75291	0.152038	31.2613	1.56616e-214	2.85856e-210
WBGene00021160	908	gba-4	1298.98	-4.75064	0.579297	8.2007	2.38986e-16	3.23109e-14
WBGene00013712	15184	dlc-6	4.28747	-4.75008	1.8187	2.6118	0.00900659	0.0807805
WBGene00195820	21875	T22E5.10	2.90831	-4.72385	2.62039	1.80273	0.0714311	0.321123
WBGene00003535	22985	nas-16	0.594555	-4.70171	5.97313	0.787143	0.431198	NA
WBGene00199795	21400	T28B11.16	0.765699	-4.7017	5.97313	0.787142	0.431199	NA
WBGene00201202	17921	T24D1.6	0.93882	-4.70156	5.87582	0.800154	0.423622	NA
WBGene00022869	17293	ZK1240.4	1.12608	-4.69581	4.03386	1.1641	0.244384	NA
WBGene00018284	7324	F41E6.1	4.72718	-4.67315	2.53446	1.84385	0.0652051	0.303297
WBGene00008106	12083	C45B11.5	4.17737	-4.6617	2.2944	2.03177	0.042177	0.232402
WBGene00010121	13642	F55G7.3	4.56413	-4.65053	2.45216	1.8965	0.0578936	0.281814
WBGene00198497	25645	F10G8.12	2.90618	-4.63926	2.83293	1.63762	0.101501	0.39683
WBGene00219243	21944	T23G4.127	1.70447	-4.63705	2.94223	1.57604	0.115017	NA
WBGene00015856	22199	C16C8.19	2.10998	-4.63667	2.9629	1.56491	0.117604	NA
WBGene00165355	9937	21ur-6124	0.565215	-4.62962	5.9744	0.774909	0.438394	NA
WBGene00020773	23892	T24E12.3	1.51735	-4.62377	4.34547	1.06404	0.287309	NA
WBGene00005751	16518	srw-4	0.899102	-4.61933	5.90991	0.781625	0.434435	NA
WBGene00200181	25962	ZK637.19	0.758924	-4.61923	5.97459	0.773146	0.439436	NA
WBGene00019051	23832	srz-23	0.676208	-4.61923	5.97459	0.773146	0.439436	NA
WBGene00044309	28323	F58F9.11	0.811866	-4.61923	5.97459	0.773146	0.439436	NA
WBGene00077556	10407	Y18D10A.27	2.36094	-4.59388	2.67724	1.7159	0.0861799	NA
WBGene00001773	14005	gst-25	11.8972	-4.57838	1.75429	2.60982	0.00905889	0.0812097
WBGene00020430	8858	irld-49	1.64273	-4.54867	3.49967	1.29974	0.19369	NA
WBGene00010531	14623	K03D3.5	2.34534	-4.54664	3.16934	1.43457	0.151409	NA
WBGene00010380	19103	mpst-2	1.40123	-4.5453	3.00549	1.51233	0.13045	NA
WBGene00005421	23099	srh-211	1.51341	-4.54316	2.80186	1.62148	0.104915	NA
WBGene00019390	16705	irld-43	1.99315	-4.54078	2.63204	1.72519	0.0844926	NA
WBGene00020667	15800	T22B2.3	2.30357	-4.53851	2.50465	1.81203	0.0699816	NA
WBGene00007672	13078	fbxa-136	4.35901	-4.52885	2.16882	2.08816	0.0367831	0.212189
WBGene00006002	7073	srx-111	4.00397	-4.52851	2.16092	2.09564	0.0361144	0.20999
WBGene00005938	18034	srx-47	3.09264	-4.52793	2.14729	2.10867	0.0349731	0.206045
WBGene00020032	17759	R12E2.6	2.48516	-4.52765	2.14071	2.11502	0.0344283	0.204419
WBGene00012655	17141	Y39A1A.17	2.93913	-4.52418	2.06976	2.18584	0.0288272	0.182502
WBGene00194870	17886	F53A2.11	3.2078	-4.52319	2.05194	2.20435	0.0274996	0.177045
WBGene00007382	19562	C06C6.8	7.15217	-4.51304	1.90978	2.36312	0.0181218	0.132889
WBGene00008650	18583	F10D11.4	8.99176	-4.5026	1.81373	2.48251	0.013046	0.105082
WBGene00255584	14965	mir-8187	1.09024	-4.47271	3.87087	1.15548	0.247894	NA
WBGene00197828	19893	C02B4.8	0.705283	-4.42723	5.97832	0.740547	0.458968	NA
WBGene00011387	23472	T02G6.4	1.32966	-4.42691	3.58902	1.23346	0.217404	NA
WBGene00013932	3758	clec-98	2.22242	-4.42162	3.19045	1.38589	0.165779	NA
WBGene00011325	7184	T01C3.11	40.235	-4.42117	1.62813	2.71549	0.00661783	0.0647313
WBGene00045508	19830	D1081.10	5.27061	-4.40963	1.78654	2.46825	0.0135774	0.108358
WBGene00045108	7927	H01G02.4	3.52076	-4.40566	1.88406	2.33839	0.0193672	0.138896
WBGene00018631	11269	F49D11.7	4.4842	-4.40288	1.98052	2.22309	0.0262097	0.171585
WBGene00012656	4734	Y39A1A.18	7.1332	-4.40273	1.98654	2.21629	0.026672	0.173414
WBGene00004275	5064	rab-11.2	3.21578	-4.40186	2.02485	2.17391	0.0297117	0.186101
WBGene00013640	12195	Y105C5A.17	3.23701	-4.40027	2.10699	2.08842	0.0367603	0.212189
WBGene00005438	15530	srh-230	2.8164	-4.39923	2.17167	2.02573	0.0427921	0.23478
WBGene00018412	18218	nhr-37	2.6107	-4.39815	2.25237	1.95268	0.0508573	0.26163
WBGene00005710	19534	sru-47	3.76553	-4.3976	2.29976	1.9122	0.055851	0.27581
WBGene00044908	11886	F38A1.15	2.61399	-4.39753	2.30598	1.90701	0.0565194	0.277833
WBGene00197482	16333	C07A12.11	1.67565	-4.39556	2.52963	1.73763	0.0822765	NA
WBGene00016160	13217	C27D6.1	1.96234	-4.3946	2.68125	1.63901	0.10121	NA
WBGene00195067	12411	C04C3.9	1.09313	-4.39219	3.3537	1.30965	0.190313	NA
WBGene00197719	7462	Y42G9A.8	1.23567	-4.39203	3.42526	1.28225	0.199755	NA
WBGene00044356	8422	W02D7.12	1.1598	-4.39201	3.43258	1.27951	0.200719	NA
WBGene00020483	23884	T13C5.2	1.59421	-4.3919	3.48698	1.25951	0.207845	NA
WBGene00012587	20059	Y38E10A.9	1.35872	-4.39105	4.03563	1.08807	0.276564	NA
WBGene00005711	14535	sru-48	0.978373	-4.39092	4.14509	1.05931	0.289461	NA
WBGene00195519	15408	Y73B3A.23	0.896472	-4.39092	4.14704	1.05881	0.289688	NA
WBGene00005304	18020	srh-83	0.97402	-4.39034	4.83349	0.908317	0.363711	NA
WBGene00194690	25007	T05D4.6	1.57532	-4.33953	3.21978	1.34777	0.177732	NA
WBGene00000213	6	asm-3	1745.91	-4.32679	0.289844	14.928	2.16621e-50	2.19654e-47
WBGene00013399	7222	Y62H9A.11	5.271	-4.2909	1.97209	2.17581	0.0295694	0.185754
WBGene00013775	6266	Y116A8A.4	6.00653	-4.289	1.95663	2.19203	0.0283772	0.180593
WBGene00044127	15845	BE10.5	6.55676	-4.28279	2.0006	2.14075	0.0322943	0.196282
WBGene00015615	5766	fbxc-48	5.37714	-4.27001	2.11135	2.0224	0.0431346	0.23607
WBGene00044801	28361	ZC262.9	0.648092	-4.25907	5.98202	0.711978	0.476479	NA
WBGene00044802	21259	ZC262.10	0.648092	-4.25907	5.98202	0.711978	0.476479	NA
WBGene00198211	43986	K03H4.5	0.842464	-4.25901	5.90981	0.720669	0.471113	NA
WBGene00019675	22768	K12D9.1	3.60333	-4.25213	2.33883	1.81806	0.0690554	0.314672
WBGene00220157	17948	Y41E3.464	1.39959	-4.24847	2.72905	1.55676	0.119528	NA
WBGene00009890	19615	scl-9	2.17408	-4.23723	2.65567	1.59554	0.110592	NA
WBGene00009752	2165	F46A8.9	2.66313	-4.23482	2.7267	1.55309	0.120401	0.438855
WBGene00012683	4736	asp-17	1676.86	-4.23401	0.329601	12.8458	9.07511e-38	5.34319e-35
WBGene00196903	19887	M01E11.9	1.67743	-4.23161	2.83431	1.493	0.135438	NA
WBGene00200167	25958	F45D3.11	1.70426	-4.23085	2.86256	1.47799	0.139409	NA
WBGene00020875	23898	T28A11.13	1.79199	-4.22662	3.04089	1.38993	0.16455	NA
WBGene00044562	18316	C14E2.7	2.01753	-4.22384	3.18329	1.32688	0.184549	NA
WBGene00201219	20407	W08D2.13	2.00203	-4.21767	3.6202	1.16504	0.244004	NA
WBGene00005831	12550	srw-84	1.90302	-4.21641	3.73682	1.12834	0.259176	NA
WBGene00077498	33387	R07B5.10	1.31601	-4.21505	3.88355	1.08536	0.277763	NA
WBGene00017227	22225	F07G6.8	1.2457	-4.21365	4.05218	1.03985	0.298411	NA
WBGene00010217	10145	sre-31	0.91948	-4.21322	4.11081	1.02491	0.305404	NA
WBGene00077546	21286	C01A2.9	1.06772	-4.21317	4.11822	1.02306	0.306281	NA
WBGene00017021	2326	D1022.2	1.10305	-4.21299	4.14279	1.01694	0.30918	NA
WBGene00044265	14349	Y105E8B.11	1.15694	-4.21094	4.4715	0.94173	0.346331	NA
WBGene00195009	22395	F17E9.16	1.43835	-4.20993	4.66918	0.901642	0.367247	NA
WBGene00012862	16623	Y45F3A.5	1.14041	-4.20985	4.68503	0.898575	0.368879	NA
WBGene00005278	26620	srh-55	1.09345	-4.20569	5.98329	0.702906	0.482114	NA
WBGene00198144	14416	C36F7.16	0.564208	-4.20569	5.98329	0.702906	0.482114	NA
WBGene00199903	25919	W07E11.6	0.418512	-4.20569	5.98329	0.702906	0.482114	NA
WBGene00005516	15038	sri-4	0.761585	-4.20569	5.98329	0.702906	0.482114	NA
WBGene00005085	14042	srd-7	2.89626	-4.16285	2.17516	1.91381	0.0556441	0.275533
WBGene00201031	13440	ZK792.10	1.54729	-4.16242	2.37311	1.754	0.079431	NA
WBGene00011390	22109	T02G6.7	1.8968	-4.16225	2.4797	1.67853	0.0932433	NA
WBGene00200423	12438	T11F9.27	0.807732	-4.16143	3.65363	1.13899	0.254709	NA
WBGene00007432	16543	srxa-18	0.636227	-4.16112	5.35289	0.77736	0.436946	NA
WBGene00005476	26681	srh-270	0.39637	-4.1146	5.98556	0.687421	0.491817	NA
WBGene00015827	27723	math-13	0.39637	-4.1146	5.98556	0.687421	0.491817	NA
WBGene00044580	20161	C24A3.9	0.39637	-4.1146	5.98556	0.687421	0.491817	NA
WBGene00196112	25203	K10D6.8	0.39637	-4.1146	5.98556	0.687421	0.491817	NA
WBGene00189932	25001	Y26G10.7	0.632755	-4.1146	5.98556	0.687421	0.491817	NA
WBGene00005166	18528	srg-8	0.813753	-4.1146	5.98556	0.687421	0.491817	NA
WBGene00220102	46663	T27C4.7	0.633225	-4.1146	5.98556	0.687421	0.491817	NA
WBGene00020607	12812	srab-20	0.866626	-4.1146	5.98556	0.687421	0.491817	NA
WBGene00013062	27253	Y51A2A.6	0.445891	-4.1146	5.98556	0.687421	0.491818	NA
WBGene00196021	25187	F09G2.10	0.441957	-4.1146	5.98556	0.687421	0.491818	NA
WBGene00047788	30558	21ur-5027	0.445216	-4.1146	5.98556	0.687421	0.491818	NA
WBGene00219786	20932	B0365.10	0.459177	-4.1146	5.98556	0.687421	0.491818	NA
WBGene00200722	26061	F47B7.15	0.553159	-4.1146	5.98556	0.687421	0.491818	NA
WBGene00198534	12930	T25D3.7	0.734429	-4.1146	5.98556	0.68742	0.491818	NA
WBGene00023278	24012	F30D4.1	0.970433	-4.1146	5.98556	0.68742	0.491818	NA
WBGene00199883	11442	F10C2.12	0.918496	-4.11206	5.12701	0.802038	0.422531	NA
WBGene00005967	23215	srx-76	1.0067	-4.11119	4.91355	0.836705	0.402758	NA
WBGene00013389	17647	Y62H9A.1	0.95249	-4.11038	4.73726	0.86767	0.385575	NA
WBGene00015840	14216	math-11	1.22917	-4.10962	4.59195	0.894962	0.370807	NA
WBGene00198206	12928	Y57A10A.41	1.73318	-4.10918	4.5164	0.909835	0.362909	NA
WBGene00007406	23290	C07A9.10	1.70527	-4.10916	4.51231	0.910654	0.362478	NA
WBGene00000642	22962	col-66	1.45673	-4.10521	3.97227	1.03347	0.301386	NA
WBGene00017511	23777	srbc-41	1.52776	-4.09979	3.49915	1.17165	0.241336	NA
WBGene00044164	17831	Y46G5A.39	2.88506	-4.09145	2.09885	1.94937	0.0512511	0.262836
WBGene00015883	21145	C17B7.9	2.60848	-4.0828	2.76507	1.47656	0.139793	0.477006
WBGene00050892	18875	ttr-57	1.96718	-4.07326	2.54797	1.59863	0.109902	NA
WBGene00009954	27126	F53B2.1	3.02473	-4.06998	2.48922	1.63504	0.10204	0.397785
WBGene00219547	15943	T06A10.106	2.55856	-4.06822	2.45946	1.65411	0.0981056	0.388506
WBGene00016075	14221	C24H12.6	2.85486	-4.068	2.45639	1.65609	0.0977037	0.387756
WBGene00022406	15328	srsx-7	1.29838	-4.06548	3.23656	1.25611	0.209076	NA
WBGene00169540	37483	21ur-13909	0.569143	-4.05629	5.98709	0.677506	0.498085	NA
WBGene00010182	14614	F57A8.7	8.87633	-4.01466	1.98183	2.02573	0.042792	0.23478
WBGene00023277	21241	F29C4.3	4.11871	-3.99259	2.41847	1.65087	0.098765	0.38968
WBGene00220243	17950	ZK484.11	2.09676	-3.98868	2.48746	1.60352	0.108821	NA
WBGene00168467	10907	21ur-9997	2.40213	-3.97308	2.39736	1.65728	0.0974635	0.387545
WBGene00194738	16279	Y46E12A.5	1.83153	-3.96742	3.08539	1.28587	0.198487	NA
WBGene00018228	13774	F40C5.1	1.45083	-3.95839	3.59208	1.10198	0.270472	NA
WBGene00196016	20306	W03A3.4	0.402416	-3.94384	5.99023	0.65838	0.510294	NA
WBGene00049921	32466	21ur-706	0.34876	-3.94384	5.99023	0.65838	0.510294	NA
WBGene00006209	13059	str-164	6.08613	-3.90705	1.78	2.19497	0.0281656	0.179667
WBGene00005640	6110	srn-1	7.15994	-3.89814	1.74568	2.23303	0.0255472	0.168683
WBGene00017650	22735	F21A9.1	10.1296	-3.8977	1.64214	2.37354	0.0176183	0.130536
WBGene00006069	23232	str-1	0.337689	-3.88868	5.99186	0.648994	0.516343	NA
WBGene00010635	27156	K07F5.7	0.337689	-3.88868	5.99186	0.648994	0.516343	NA
WBGene00011620	23480	T08G3.11	0.769762	-3.88868	5.99186	0.648993	0.516343	NA
WBGene00005607	18026	srj-19	0.643083	-3.88868	5.99186	0.648993	0.516343	NA
WBGene00219569	26429	linc-147	0.431039	-3.88867	5.99186	0.648993	0.516343	NA
WBGene00200606	10952	Y37E3.29	1.54658	-3.88758	4.48739	0.866332	0.386308	NA
WBGene00013059	27252	Y51A2A.3	0.789393	-3.88727	4.24166	0.916448	0.359432	NA
WBGene00015836	21144	math-7	1.30512	-3.88669	3.89414	0.998089	0.318236	NA
WBGene00198647	16354	Y34B4A.15	0.925879	-3.88608	3.61162	1.07599	0.281931	NA
WBGene00044587	18319	srz-105	1.23775	-3.88545	3.38937	1.14637	0.251644	NA
WBGene00196743	15414	K10C3.9	1.32743	-3.88489	3.22444	1.20483	0.228271	NA
WBGene00198446	12431	T25D10.6	1.31163	-3.8834	2.90094	1.33867	0.180679	NA
WBGene00197097	20336	F13B9.9	1.76502	-3.88256	2.7676	1.40286	0.160658	NA
WBGene00004171	15983	pqn-91	1.37079	-3.88231	2.73038	1.42189	0.155058	NA
WBGene00007074	18052	AC8.2	2.4615	-3.88213	2.70689	1.43417	0.151524	0.496299
WBGene00005257	13044	srh-34	2.00893	-3.88032	2.50276	1.55042	0.121041	NA
WBGene00197555	13418	Y67D8A.8	2.48564	-3.88014	2.48551	1.56111	0.118499	0.435441
WBGene00219309	13953	F26F2.13	1.61686	-3.8801	2.48111	1.56386	0.117851	NA
WBGene00020485	20600	ceh-54	2.87731	-3.8799	2.46343	1.575	0.115257	0.429671
WBGene00018441	23810	math-29	1.98656	-3.87947	2.426	1.59912	0.109794	NA
WBGene00044571	18318	C46F4.3	3.44746	-3.87731	2.27108	1.70725	0.0877752	0.364522
WBGene00009833	23367	F47G9.6	2.7474	-3.87718	2.2631	1.71321	0.0866731	0.362253
WBGene00012304	23512	cutl-4	3.43373	-3.87335	2.07601	1.86577	0.0620737	0.295267
WBGene00017520	4832	F16G10.5	3.23175	-3.87228	2.03632	1.9016	0.057223	0.279709
WBGene00235343	11472	Y69A2AR.51	4.59408	-3.86988	1.95988	1.97455	0.0483195	0.253064
WBGene00044909	10885	C48D1.7	4.51866	-3.86763	1.90099	2.03454	0.0418976	0.231423
WBGene00255728	13968	R02C2.8	5.42724	-3.8675	1.89792	2.03775	0.0415749	0.230296
WBGene00219546	987	F41E7.20	7.8814	-3.862	1.7901	2.15742	0.0309727	0.190727
WBGene00255597	21453	pals-21	14.0139	-3.86044	1.76585	2.18616	0.0288036	0.182416
WBGene00003433	20985	msp-37	2.34029	-3.7924	2.11259	1.79514	0.0726317	NA
WBGene00008285	23314	C53D6.8	1.60347	-3.77787	2.60668	1.44931	0.147252	NA
WBGene00169973	14381	21ur-9960	0.906732	-3.76702	3.73887	1.00753	0.31368	NA
WBGene00013101	270	Y51H4A.5	6.74979	-3.72334	1.77255	2.10055	0.0356801	0.208465
WBGene00011483	22628	T05E11.7	3.53108	-3.72192	2.03029	1.8332	0.0667731	0.30823
WBGene00008374	19585	clec-220	2.07534	-3.72181	2.9633	1.25597	0.209128	NA
WBGene00011187	3219	R10D12.6	4.66671	-3.71683	2.06545	1.79953	0.0719356	0.322279
WBGene00044486	14833	Y54G2A.42	7.39928	-3.71536	1.89582	1.95976	0.0500237	0.259121
WBGene00235359	12463	F56D6.22	7.73243	-3.71039	2.1145	1.75473	0.0793048	0.343624
WBGene00001890	22481	his-16	2.4503	-3.69951	2.21096	1.67326	0.0942759	0.379379
WBGene00047615	16779	21ur-4038	0.297278	-3.69745	5.998	0.616447	0.537599	NA
WBGene00167120	35318	21ur-14859	0.297278	-3.69745	5.998	0.616447	0.537599	NA
WBGene00197022	43298	Y53F4B.54	0.5119	-3.69745	5.998	0.616447	0.537599	NA
WBGene00199112	22419	C08B11.11	0.390628	-3.69745	5.998	0.616447	0.5376	NA
WBGene00194997	25024	F42C5.12	0.672867	-3.69745	5.998	0.616446	0.5376	NA
WBGene00173119	24896	21ur-8158	0.342865	-3.69745	5.998	0.616446	0.5376	NA
WBGene00196644	25303	K08H10.15	0.360084	-3.69745	5.998	0.616446	0.5376	NA
WBGene00235179	46758	F32D1.12	0.410029	-3.69745	5.998	0.616446	0.5376	NA
WBGene00005202	14526	srg-45	0.343953	-3.69744	5.998	0.616446	0.5376	NA
WBGene00195671	22894	R186.9	0.94767	-3.69397	5.11581	0.722069	0.470252	NA
WBGene00011183	8675	R09H10.6	3.89062	-3.68946	2.32031	1.59007	0.111818	0.421414
WBGene00021013	16144	W03G1.8	0.942973	-3.68886	4.35201	0.847623	0.396648	NA
WBGene00011357	1709	T01H10.4	2.25389	-3.68777	2.34108	1.57524	0.115201	NA
WBGene00007245	23288	C01G12.5	2.85606	-3.68475	2.38016	1.54811	0.121596	0.441314
WBGene00268189	14967	Y50D4B.9	2.2115	-3.68441	2.38469	1.54502	0.12234	NA
WBGene00235368	6478	F49F1.18	3.04761	-3.68191	2.41941	1.52182	0.128053	0.453307
WBGene00044658	12877	C01G10.17	2.36064	-3.67697	2.49462	1.47396	0.140493	NA
WBGene00020826	15296	T26A8.3	4.34796	-3.6737	2.54996	1.44069	0.149672	0.493678
WBGene00022674	13330	ZK177.9	6.35774	-3.67127	2.59448	1.41503	0.157059	0.504603
WBGene00007572	15072	C14A6.8	2.50535	-3.66145	2.81011	1.30296	0.192589	0.555375
WBGene00003451	2051	msp-58	9.64128	-3.66083	1.08757	3.36608	0.000762457	0.0119147
WBGene00017629	14246	F20B6.5	4.52089	-3.65854	1.96296	1.86379	0.0623514	0.295871
WBGene00017399	22232	lgc-51	1.78107	-3.65755	2.91668	1.25401	0.209838	NA
WBGene00006152	6113	str-94	1.74558	-3.65592	2.96594	1.23264	0.217711	NA
WBGene00173303	16818	21ur-14797	1.93237	-3.65585	2.96819	1.23168	0.21807	NA
WBGene00011363	9692	ocam-1	1.59353	-3.65162	3.11216	1.17334	0.240659	NA
WBGene00017602	23780	clec-211	1.49362	-3.65161	3.11262	1.17316	0.240731	NA
WBGene00023387	19325	Y67D2.t3	1.09893	-3.64907	3.21243	1.13592	0.25599	NA
WBGene00011567	27181	nhr-215	1.66693	-3.64897	3.21604	1.13462	0.256536	NA
WBGene00005060	21500	sra-34	1.84046	-3.64735	3.28621	1.1099	0.267044	NA
WBGene00020755	19290	grl-31	1.60561	-3.64503	3.39605	1.07331	0.28313	NA
WBGene00023471	21783	srz-86	1.74449	-3.64317	3.49468	1.04249	0.297185	NA
WBGene00015663	18178	C10A4.2	1.56331	-3.6424	3.53789	1.02954	0.303225	NA
WBGene00016132	22705	C26B9.2	5.86333	-3.64206	1.53471	2.37313	0.0176382	0.130601
WBGene00046694	24209	21ur-5138	0.921291	-3.64126	3.60621	1.00972	0.31263	NA
WBGene00000989	2018	dhs-26	280.771	-3.64019	0.323229	11.2619	2.02264e-29	7.85472e-27
WBGene00219572	26430	linc-146	1.13401	-3.63892	3.76094	0.967558	0.333265	NA
WBGene00006029	16018	srx-138	1.12363	-3.63723	3.88838	0.935412	0.349576	NA
WBGene00020328	10819	clec-20	1.24321	-3.63674	3.92806	0.925836	0.354531	NA
WBGene00044659	11881	fbxa-142	1.53524	-3.63659	3.93997	0.923001	0.356007	NA
WBGene00013047	9720	Y50E8A.2	1.09317	-3.63401	4.17663	0.870081	0.384256	NA
WBGene00005402	15996	srh-187	1.05787	-3.63386	4.19134	0.866993	0.385946	NA
WBGene00017581	19223	F18G5.5	1.02901	-3.63344	4.23459	0.858038	0.390871	NA
WBGene00045460	19347	C15C8.8	0.809421	-3.63268	4.31707	0.84147	0.400085	NA
WBGene00235351	46776	C32B5.18	0.97094	-3.63223	4.36878	0.831407	0.405744	NA
WBGene00022408	27948	srsx-3	0.886809	-3.63216	4.37741	0.82975	0.40668	NA
WBGene00005695	23149	sru-32	1.10228	-3.63173	4.4286	0.820061	0.412181	NA
WBGene00019681	6378	K12H4.6	1.43373	-3.63099	4.52041	0.803245	0.421833	NA
WBGene00235258	17952	T05C7.5	0.917957	-3.62721	5.12229	0.708122	0.47887	NA
WBGene00009392	16576	F35C5.4	0.955551	-3.62718	5.12778	0.707359	0.479344	NA
WBGene00194804	25014	mir-2207	0.862107	-3.62701	5.15999	0.702911	0.482111	NA
WBGene00018030	13772	F35B3.3	0.73389	-3.62613	5.34601	0.678287	0.49759	NA
WBGene00018180	23802	srsx-22	0.739307	-3.62608	5.35713	0.676869	0.498489	NA
WBGene00020974	16142	W03B1.5	0.696659	-3.62578	5.42509	0.668336	0.503919	NA
WBGene00195267	14399	C45E5.53	1.07867	-3.62549	5.49164	0.660184	0.509136	NA
WBGene00201933	46090	F22E12.12	1.35229	-3.62521	3.24315	1.11781	0.26365	NA
WBGene00046981	24228	21ur-3003	0.580409	-3.62488	5.64667	0.641951	0.520905	NA
WBGene00023273	24011	F23C8.2	0.95776	-3.6241	5.86631	0.617782	0.536719	NA
WBGene00009036	8639	F22B3.5	0.279008	-3.62367	6.0006	0.603884	0.545921	NA
WBGene00018875	27831	F55D1.1	0.279008	-3.62367	6.0006	0.603884	0.545921	NA
WBGene00049109	31730	21ur-2325	0.279008	-3.62367	6.0006	0.603884	0.545921	NA
WBGene00173665	41088	21ur-12335	0.279008	-3.62367	6.0006	0.603884	0.545921	NA
WBGene00195362	42399	Y82E9BR.26	0.279008	-3.62367	6.0006	0.603884	0.545921	NA
WBGene00195774	20753	F20D1.12	0.279008	-3.62367	6.0006	0.603884	0.545921	NA
WBGene00199843	44903	T22B11.9	0.279008	-3.62367	6.0006	0.603884	0.545921	NA
WBGene00016687	21158	srbc-17	0.417078	-3.62367	6.0006	0.603884	0.545921	NA
WBGene00011786	20526	T15D6.12	0.37805	-3.62367	6.0006	0.603884	0.545921	NA
WBGene00005377	26650	srh-161	0.370182	-3.62367	6.0006	0.603884	0.545921	NA
WBGene00195875	14402	F11C7.8	0.370182	-3.62367	6.0006	0.603884	0.545921	NA
WBGene00009765	23365	F46B3.14	0.3767	-3.62367	6.0006	0.603884	0.545921	NA
WBGene00201781	46004	Y37H2A.17	0.3767	-3.62367	6.0006	0.603884	0.545921	NA
WBGene00005232	15989	srh-6	0.408551	-3.62367	6.0006	0.603884	0.545921	NA
WBGene00016831	23756	sre-56	0.408551	-3.62367	6.0006	0.603884	0.545921	NA
WBGene00005732	26741	srv-21	0.515392	-3.62367	6.0006	0.603884	0.545921	NA
WBGene00255577	46799	mir-8205	0.515392	-3.62367	6.0006	0.603884	0.545921	NA
WBGene00170914	24758	21ur-10346	0.538094	-3.62367	6.0006	0.603884	0.545921	NA
WBGene00044441	14353	Y119C1B.11	0.587434	-3.62367	6.0006	0.603884	0.545921	NA
WBGene00017516	23778	F16G10.1	0.620505	-3.62367	6.0006	0.603884	0.545921	NA
WBGene00005458	20483	srh-252	0.637545	-3.62367	6.0006	0.603884	0.545921	NA
WBGene00018504	14264	F46F5.13	0.673825	-3.62367	6.0006	0.603884	0.545921	NA
WBGene00013783	23567	Y116A8C.1	0.803756	-3.62367	6.0006	0.603884	0.545921	NA
WBGene00044162	24057	F49C5.10	0.85721	-3.62367	6.0006	0.603884	0.545921	NA
WBGene00170190	38050	21ur-7973	0.324595	-3.62367	6.0006	0.603884	0.545921	NA
WBGene00010394	27139	srz-59	0.488353	-3.62367	6.0006	0.603884	0.545921	NA
WBGene00220073	26875	T19E7.29	0.679172	-3.62367	6.0006	0.603884	0.545921	NA
WBGene00018870	27830	F55C12.2	0.615337	-3.62367	6.0006	0.603884	0.545921	NA
WBGene00013372	27267	Y61B8B.2	0.68026	-3.62366	6.0006	0.603884	0.545921	NA
WBGene00197324	43468	F16A11.6	0.36458	-3.62366	6.0006	0.603884	0.545921	NA
WBGene00198098	43926	T02C5.6	0.372358	-3.62366	6.0006	0.603884	0.545921	NA
WBGene00200820	45462	Y50D7A.17	0.76669	-3.62366	6.0006	0.603884	0.545921	NA
WBGene00005175	18017	srg-18	0.688634	-3.62366	6.0006	0.603884	0.545921	NA
WBGene00044192	22840	F46B6.13	0.652399	-3.62366	6.0006	0.603884	0.545921	NA
WBGene00006266	20011	str-238	0.450152	-3.62366	6.00059	0.603884	0.545921	NA
WBGene00199992	16899	M05B5.9	0.450152	-3.62366	6.00059	0.603884	0.545921	NA
WBGene00198278	44019	K03C7.9	0.6015	-3.62366	6.00059	0.603884	0.545921	NA
WBGene00200948	45530	Y42H9B.9	0.600431	-3.62366	6.00059	0.603884	0.545921	NA
WBGene00045359	24131	mir-799	0.581311	-3.62366	6.00059	0.603884	0.545921	NA
WBGene00196389	20316	Y65B4BL.9	0.791414	-3.62366	6.00059	0.603884	0.545921	NA
WBGene00206492	26394	F11D11.21	2.18582	-3.60078	2.27221	1.5847	0.113034	NA
WBGene00018124	19234	F36H12.10	12.7418	-3.57775	1.27503	2.80602	0.00501579	0.053127
WBGene00199958	18919	F09E5.21	1.49678	-3.57339	2.92007	1.22373	0.221053	NA
WBGene00020759	17254	T24C4.3	11.1671	-3.55193	1.28753	2.75871	0.00580304	0.0590396
WBGene00077601	33406	T06C12.17	0.267937	-3.55163	6.00326	0.591616	0.554107	NA
WBGene00174946	19374	21ur-9014	0.267937	-3.55163	6.00326	0.591616	0.554107	NA
WBGene00219608	16450	linc-58	0.521917	-3.55163	6.00326	0.591616	0.554107	NA
WBGene00009704	20512	F44F4.9	4.94802	-3.54374	2.12337	1.66893	0.0951318	0.381599
WBGene00200910	26106	F11A6.12	1.04503	-3.54127	3.47952	1.01775	0.308799	NA
WBGene00169639	6940	21ur-15242	0.970702	-3.53384	2.93436	1.20429	0.228476	NA
WBGene00022439	7898	Y110A2AL.2	35.3192	-3.53212	1.16507	3.03169	0.00243192	0.0305627
WBGene00170452	6942	21ur-10676	1.43811	-3.52692	2.63581	1.33808	0.180871	NA
WBGene00021099	15804	W08F4.10	2.08077	-3.51939	2.41782	1.4556	0.145502	NA
WBGene00013843	5244	fbxa-49	7.29621	-3.51531	1.61985	2.17015	0.0299958	0.187302
WBGene00195179	8454	F48C1.11	3.03743	-3.5061	3.14315	1.11547	0.264647	0.644103
WBGene00197742	8946	F41D9.11	3.61974	-3.50396	1.89536	1.84871	0.0645001	0.301729
WBGene00012537	19148	Y37A1B.4	1.59288	-3.50286	4.52886	0.773454	0.439254	NA
WBGene00195010	10427	Y37E11AL.12	5.84713	-3.47855	1.53522	2.26583	0.0234619	0.158485
WBGene00019208	11287	lips-14	149.206	-3.45381	0.380468	9.07778	1.10816e-19	2.08517e-17
WBGene00015860	3297	C16D9.5	39.2255	-3.44739	0.560999	6.1451	7.99143e-10	5.09999e-08
WBGene00005824	26773	srw-77	3.67678	-3.44234	2.04293	1.685	0.0919885	0.374103
WBGene00220123	17447	W06H8.16	6.23067	-3.43845	1.47406	2.33264	0.0196669	0.140714
WBGene00005227	18530	srh-1	2.22064	-3.43746	2.38727	1.43991	0.149892	NA
WBGene00022156	9894	Y71G12B.18	20.7026	-3.42736	1.42618	2.40318	0.0162534	0.123762
WBGene00044896	9927	K12C11.5	6.23197	-3.402	1.75228	1.94146	0.052202	0.26592
WBGene00021285	18809	Y24D9A.7	2.13658	-3.39908	2.7275	1.24622	0.212682	NA
WBGene00020333	16711	sre-12	5.50942	-3.39875	1.47969	2.29693	0.0216229	0.150212
WBGene00020277	12312	T06A1.1	11.4219	-3.39752	1.36112	2.49613	0.0125557	0.10219
WBGene00010978	22098	R02D5.4	1.08426	-3.39674	3.04728	1.11468	0.264988	NA
WBGene00199250	16365	C36F7.18	1.08178	-3.39576	3.22962	1.05144	0.293056	NA
WBGene00023481	20153	srz-22	1.33584	-3.39344	3.88652	0.87313	0.382592	NA
WBGene00005418	23097	srh-208	0.89137	-3.3934	3.90272	0.869497	0.384575	NA
WBGene00198128	25572	F59G1.11	0.616037	-3.39104	5.51631	0.614729	0.538733	NA
WBGene00219586	17942	linc-108	0.5685	-3.39094	5.64372	0.600834	0.547951	NA
WBGene00220107	21444	W01A11.21	0.561023	-3.39086	5.73607	0.591148	0.554422	NA
WBGene00172518	19854	21ur-10214	0.297693	-3.39068	6.00971	0.5642	0.572618	NA
WBGene00173246	15887	21ur-8554	0.41373	-3.39068	6.00971	0.5642	0.572618	NA
WBGene00023228	28180	BE0003N10.t2	0.471521	-3.39068	6.00971	0.5642	0.572618	NA
WBGene00044054	13858	C04H5.9	14.413	-3.37596	1.81882	1.85613	0.0634354	0.299015
WBGene00044995	21804	Y105C5A.28	5.31666	-3.35779	1.7894	1.87649	0.0605883	0.290633
WBGene00197888	11938	F16D3.8	4.50228	-3.35752	1.84509	1.81971	0.0688033	0.313949
WBGene00015799	6761	C15H9.3	9.36479	-3.34838	1.18605	2.82313	0.00475571	0.0510595
WBGene00004455	5560	rpl-42	11.1071	-3.34702	1.04649	3.19832	0.00138228	0.0194073
WBGene00022096	922	Y69A2AR.25	44.1458	-3.34644	0.668819	5.00351	5.62955e-07	2.17692e-05
WBGene00045120	19824	Y43F8C.22	6.88373	-3.34568	1.81022	1.84822	0.0645702	0.301802
WBGene00014142	22673	ZK899.3	5.06171	-3.34238	1.47222	2.27031	0.0231889	0.157106
WBGene00017627	12751	F20B6.1	2.70116	-3.33662	2.28638	1.45934	0.144471	0.485357
WBGene00269346	14463	R07C3.17	1.22848	-3.32927	3.8975	0.854206	0.392991	NA
WBGene00044207	20628	Y6G8.5	2.47374	-3.32663	2.2144	1.50227	0.133027	0.462988
WBGene00219564	18443	linc-102	4.54619	-3.31745	2.01589	1.64565	0.0998358	0.391958
WBGene00016917	11760	C54E4.1	6.06351	-3.31702	1.49268	2.2222	0.0262701	0.171795
WBGene00011851	23493	clec-23	2.47702	-3.31038	2.54589	1.30028	0.193505	0.556284
WBGene00011873	18120	T20G5.12	3.89411	-3.29895	2.26053	1.45937	0.144464	0.485357
WBGene00009830	5650	cutl-18	161.172	-3.29486	0.333124	9.89079	4.56402e-23	1.26216e-20
WBGene00194896	14393	W02H5.11	2.32963	-3.29401	2.30879	1.42673	0.153658	NA
WBGene00023454	20151	mir-357	1.74953	-3.28937	2.72189	1.20849	0.22686	NA
WBGene00007264	14560	C02F4.4	32.8354	-3.28738	1.01359	3.24331	0.00118151	0.0171347
WBGene00197796	13921	B0001.11	2.38495	-3.27679	2.07396	1.57997	0.114114	0.426943
WBGene00009226	16574	cyp-37B1	76.7892	-3.25693	0.647593	5.02928	4.92318e-07	1.93243e-05
WBGene00044306	13349	F58F9.8	4.01375	-3.23997	2.25636	1.43593	0.151022	0.495708
WBGene00044275	24066	nspa-10	0.964643	-3.23778	3.44425	0.940052	0.347191	NA
WBGene00198768	18410	T24D5.9	0.719172	-3.22006	4.62532	0.696182	0.486315	NA
WBGene00196025	18900	C52E4.13	0.585914	-3.21871	4.7803	0.673329	0.500738	NA
WBGene00200391	26004	C40H1.11	0.69776	-3.21572	5.18774	0.61987	0.535344	NA
WBGene00173856	41247	21ur-11127	0.675294	-3.21525	5.26295	0.610922	0.541251	NA
WBGene00201022	45569	Y69A2AR.43	0.353381	-3.21147	6.01777	0.533665	0.593573	NA
WBGene00050103	24384	21ur-4733	0.209256	-3.21147	6.01777	0.533663	0.593574	NA
WBGene00166126	24534	21ur-7057	0.209256	-3.21147	6.01777	0.533663	0.593574	NA
WBGene00201516	26202	F45B8.20	0.209256	-3.21147	6.01777	0.533663	0.593574	NA
WBGene00016727	23750	C46H11.1	0.306948	-3.21147	6.01777	0.533663	0.593574	NA
WBGene00050253	24394	21ur-2631	0.327448	-3.21147	6.01777	0.533663	0.593574	NA
WBGene00200355	17408	F22A3.15	0.313948	-3.21147	6.01777	0.533663	0.593574	NA
WBGene00000654	26452	col-78	0.41636	-3.21147	6.01777	0.533663	0.593574	NA
WBGene00196781	43178	Y65B4BL.10	0.397675	-3.21147	6.01777	0.533663	0.593574	NA
WBGene00048054	30795	21ur-4276	0.567779	-3.21147	6.01777	0.533663	0.593574	NA
WBGene00018558	12773	srt-20	0.638032	-3.21146	6.01777	0.533663	0.593575	NA
WBGene00017521	9807	F16G10.6	1.73551	-3.1957	3.48528	0.916915	0.359187	NA
WBGene00020863	12327	T27E4.5	3.91645	-3.1903	2.02446	1.57587	0.115055	0.429268
WBGene00170539	5460	21ur-14699	4.78567	-3.18769	1.52825	2.08584	0.0369928	0.212793
WBGene00008935	9130	F18C12.4	9.11286	-3.16091	1.19784	2.63883	0.00831922	0.0759972
WBGene00045254	8431	F33E2.8	4.45905	-3.11794	1.92204	1.6222	0.10476	0.405053
WBGene00045363	17846	F11D11.13	1.05154	-3.11693	3.90086	0.799036	0.42427	NA
WBGene00006235	20010	str-199	0.198185	-3.10833	6.02289	0.516086	0.605794	NA
WBGene00009150	27101	clec-234	0.198185	-3.10833	6.02289	0.516086	0.605794	NA
WBGene00009378	20032	F34H10.1	0.198185	-3.10833	6.02289	0.516086	0.605794	NA
WBGene00011395	20523	T03E6.2	0.198185	-3.10833	6.02289	0.516086	0.605794	NA
WBGene00012305	27229	W06D12.6	0.198185	-3.10833	6.02289	0.516086	0.605794	NA
WBGene00015730	27717	srt-1	0.198185	-3.10833	6.02289	0.516086	0.605794	NA
WBGene00019123	23838	F59E12.8	0.198185	-3.10833	6.02289	0.516086	0.605794	NA
WBGene00020056	27875	R13D11.1	0.198185	-3.10833	6.02289	0.516086	0.605794	NA
WBGene00021568	27923	srt-2	0.198185	-3.10833	6.02289	0.516086	0.605794	NA
WBGene00021572	27927	srd-72	0.198185	-3.10833	6.02289	0.516086	0.605794	NA
WBGene00022919	23974	C09B7.4	0.198185	-3.10833	6.02289	0.516086	0.605794	NA
WBGene00046518	29419	21ur-1461	0.198185	-3.10833	6.02289	0.516086	0.605794	NA
WBGene00047846	16780	21ur-5215	0.198185	-3.10833	6.02289	0.516086	0.605794	NA
WBGene00048027	30769	21ur-2147	0.198185	-3.10833	6.02289	0.516086	0.605794	NA
WBGene00050736	33201	21ur-4697	0.198185	-3.10833	6.02289	0.516086	0.605794	NA
WBGene00050977	24436	F56H9.7	0.198185	-3.10833	6.02289	0.516086	0.605794	NA
WBGene00165377	33793	21ur-6178	0.198185	-3.10833	6.02289	0.516086	0.605794	NA
WBGene00169911	37801	21ur-12223	0.198185	-3.10833	6.02289	0.516086	0.605794	NA
WBGene00173988	41369	21ur-12968	0.198185	-3.10833	6.02289	0.516086	0.605794	NA
WBGene00196020	20307	F35G2.9	0.198185	-3.10833	6.02289	0.516086	0.605794	NA
WBGene00196067	21340	Y39G8C.5	0.198185	-3.10833	6.02289	0.516086	0.605794	NA
WBGene00196593	21347	C03F11.7	0.198185	-3.10833	6.02289	0.516086	0.605794	NA
WBGene00196809	43195	T10B10.10	0.198185	-3.10833	6.02289	0.516086	0.605794	NA
WBGene00197573	15916	F14B8.11	0.198185	-3.10833	6.02289	0.516086	0.605794	NA
WBGene00197877	43802	Y66A7AL.5	0.198185	-3.10833	6.02289	0.516086	0.605794	NA
WBGene00198414	16351	T22B2.8	0.198185	-3.10833	6.02289	0.516086	0.605794	NA
WBGene00199876	44920	F10F2.13	0.198185	-3.10833	6.02289	0.516086	0.605794	NA
WBGene00200534	45292	H13N06.10	0.198185	-3.10833	6.02289	0.516086	0.605794	NA
WBGene00200622	45341	F46F3.16	0.198185	-3.10833	6.02289	0.516086	0.605794	NA
WBGene00200896	45502	F42H10.15	0.198185	-3.10833	6.02289	0.516086	0.605794	NA
WBGene00202244	46266	ZC64.16	0.198185	-3.10833	6.02289	0.516086	0.605794	NA
WBGene00005693	17540	sru-30	0.289359	-3.10833	6.02289	0.516086	0.605794	NA
WBGene00202096	46183	Y66A7AL.9	0.289359	-3.10833	6.02289	0.516086	0.605794	NA
WBGene00194808	25015	mir-2216	0.295877	-3.10833	6.02289	0.516086	0.605794	NA
WBGene00005283	26621	srh-61	0.316377	-3.10833	6.02289	0.516086	0.605794	NA
WBGene00197493	43568	T28B11.11	0.316377	-3.10833	6.02289	0.516086	0.605794	NA
WBGene00005265	12543	srh-42	0.323798	-3.10833	6.02289	0.516086	0.605794	NA
WBGene00019387	16135	K04F1.8	0.305496	-3.10833	6.02289	0.516086	0.605794	NA
WBGene00015895	27731	C17C3.13	0.302877	-3.10833	6.02289	0.516086	0.605794	NA
WBGene00050434	16208	21ur-1389	0.302877	-3.10833	6.02289	0.516086	0.605794	NA
WBGene00011574	16061	T07C12.10	0.327728	-3.10833	6.02289	0.516086	0.605794	NA
WBGene00044579	24084	C06E2.9	0.327728	-3.10833	6.02289	0.516086	0.605794	NA
WBGene00196284	42896	F26A10.9	0.453156	-3.10833	6.02289	0.516086	0.605794	NA
WBGene00005273	19982	srh-50	0.500881	-3.10833	6.02289	0.516086	0.605794	NA
WBGene00206471	20436	Y22F5A.11	0.396671	-3.10833	6.02289	0.516086	0.605794	NA
WBGene00011458	19127	irld-47	0.42149	-3.10833	6.02289	0.516086	0.605794	NA
WBGene00006278	14059	str-252	0.421069	-3.10833	6.02289	0.516086	0.605794	NA
WBGene00044103	20626	srbc-47	0.453341	-3.10833	6.02289	0.516086	0.605794	NA
WBGene00016369	23729	C33G8.13	0.435039	-3.10833	6.02289	0.516086	0.605794	NA
WBGene00044215	28317	ZK228.10	0.466657	-3.10833	6.02289	0.516086	0.605794	NA
WBGene00005838	15537	srw-91	0.701128	-3.10833	6.02289	0.516086	0.605794	NA
WBGene00013501	16079	Y71A12B.3	0.512664	-3.10833	6.02289	0.516086	0.605794	NA
WBGene00019136	23840	F59H6.5	0.526214	-3.10833	6.02289	0.516086	0.605794	NA
WBGene00005883	23198	srw-136	0.539732	-3.10833	6.02289	0.516086	0.605794	NA
WBGene00012817	13695	Y43F8B.6	0.297227	-3.10832	6.02289	0.516085	0.605795	NA
WBGene00197467	43554	ZK836.8	0.297227	-3.10832	6.02289	0.516085	0.605795	NA
WBGene00016857	27756	srt-16	0.396268	-3.10832	6.02289	0.516085	0.605795	NA
WBGene00006024	23230	srx-133	0.43457	-3.10832	6.02289	0.516085	0.605795	NA
WBGene00005406	23092	srh-193	0.532121	-3.10832	6.02289	0.516085	0.605795	NA
WBGene00006151	23249	str-93	0.514881	-3.10832	6.02289	0.516085	0.605795	NA
WBGene00010949	18637	M195.4	0.578616	-3.10832	6.02289	0.516085	0.605795	NA
WBGene00006250	27004	str-219	0.683229	-3.10832	6.02289	0.516085	0.605795	NA
WBGene00201242	17418	F29G9.16	0.551957	-3.10832	6.02289	0.516085	0.605795	NA
WBGene00007456	21532	srz-29	0.743311	-3.10832	6.02289	0.516085	0.605795	NA
WBGene00202497	46409	R02F11.10	0.788338	-3.10832	6.02289	0.516085	0.605795	NA
WBGene00198599	25662	F12F6.16	0.491262	-3.10832	6.02289	0.516085	0.605795	NA
WBGene00005885	26794	srw-138	0.588954	-3.10832	6.02289	0.516085	0.605795	NA
WBGene00199069	44454	F35B12.13	0.616953	-3.10832	6.02289	0.516085	0.605795	NA
WBGene00202150	46209	F33C8.9	0.631282	-3.10832	6.02289	0.516085	0.605795	NA
WBGene00018457	20582	fbxb-29	0.806907	-3.10832	6.02289	0.516085	0.605795	NA
WBGene00165803	24512	21ur-9264	0.26722	-3.10832	6.02289	0.516085	0.605795	NA
WBGene00050500	32991	21ur-1953	0.257281	-3.10832	6.02289	0.516085	0.605795	NA
WBGene00197104	43341	C35A5.14	0.257281	-3.10832	6.02289	0.516085	0.605795	NA
WBGene00235116	16951	C03G6.21	0.257281	-3.10832	6.02289	0.516085	0.605795	NA
WBGene00009169	18083	F26F2.4	0.260991	-3.10832	6.02289	0.516085	0.605795	NA
WBGene00168576	36639	21ur-12610	0.251841	-3.10832	6.02289	0.516085	0.605795	NA
WBGene00168296	36390	21ur-13103	0.292789	-3.10832	6.02289	0.516085	0.605795	NA
WBGene00018190	20105	F38H12.5	0.90438	-3.10832	6.02289	0.516085	0.605795	NA
WBGene00018244	23804	F40G9.8	0.310937	-3.10832	6.02289	0.516085	0.605795	NA
WBGene00019992	27872	R10A10.1	0.311803	-3.10832	6.02289	0.516085	0.605795	NA
WBGene00005148	15988	srd-71	0.357561	-3.10832	6.02289	0.516085	0.605795	NA
WBGene00206370	46411	F02D8.9	0.346073	-3.10832	6.02289	0.516085	0.605795	NA
WBGene00005309	23059	srh-88	0.348455	-3.10832	6.02289	0.516085	0.605795	NA
WBGene00198847	12932	F49E2.8	0.368934	-3.10832	6.02289	0.516085	0.605795	NA
WBGene00202374	2985	T01C8.11	0.449828	-3.10832	6.02289	0.516085	0.605795	NA
WBGene00194802	25013	mir-1832.2	0.398419	-3.10832	6.02289	0.516085	0.605795	NA
WBGene00013619	21643	fbxa-112	0.530804	-3.10832	6.02289	0.516085	0.605795	NA
WBGene00014694	19181	C33D3.2	0.617533	-3.10832	6.02289	0.516085	0.605795	NA
WBGene00197927	43826	C04D8.3	0.734224	-3.10832	6.02289	0.516085	0.605795	NA
WBGene00166786	12400	21ur-8039	0.369329	-3.10832	6.02288	0.516086	0.605795	NA
WBGene00008479	27082	glct-2	0.498872	-3.10832	6.02288	0.516086	0.605795	NA
WBGene00045514	24141	ZK1037.12	0.24486	-3.10832	6.02288	0.516085	0.605795	NA
WBGene00045968	28915	21ur-1524	0.24486	-3.10832	6.02288	0.516085	0.605795	NA
WBGene00077615	21829	T08G3.14	0.24486	-3.10832	6.02288	0.516085	0.605795	NA
WBGene00045113	28429	Y43F4B.12	0.343902	-3.10832	6.02288	0.516085	0.605795	NA
WBGene00045987	28930	21ur-1441	0.499341	-3.10832	6.02288	0.516085	0.605795	NA
WBGene00019306	23845	K02E7.1	0.616075	-3.10832	6.02288	0.516085	0.605795	NA
WBGene00171392	20711	21ur-10321	0.283757	-3.10832	6.02288	0.516085	0.605795	NA
WBGene00201471	45818	Y97E10AL.5	0.332603	-3.10832	6.02288	0.516085	0.605795	NA
WBGene00206506	26395	F59A1.18	0.401949	-3.10832	6.02288	0.516085	0.605795	NA
WBGene00199367	17912	Y69H2.20	0.423948	-3.10832	6.02288	0.516085	0.605795	NA
WBGene00046612	29507	21ur-3076	0.483053	-3.10832	6.02288	0.516085	0.605795	NA
WBGene00201006	26126	C56E10.6	0.291535	-3.10832	6.02288	0.516085	0.605795	NA
WBGene00077703	33436	K08E5.5	0.396228	-3.10832	6.02288	0.516085	0.605795	NA
WBGene00196331	16305	B0198.4	0.421078	-3.10832	6.02288	0.516085	0.605795	NA
WBGene00077455	22860	Y69H2.17	0.856842	-3.10832	6.02288	0.516085	0.605795	NA
WBGene00235378	18454	E03H12.27	0.387057	-3.10832	6.02288	0.516085	0.605795	NA
WBGene00016854	23757	srt-10	0.804967	-3.10832	6.02288	0.516085	0.605795	NA
WBGene00022521	12853	ZC132.2	0.567412	-3.10832	6.02288	0.516085	0.605795	NA
WBGene00219968	20938	F54F2.13	0.808944	-3.10832	6.02288	0.516085	0.605795	NA
WBGene00003335	22983	mir-241	0.535165	-3.10832	6.02288	0.516085	0.605795	NA
WBGene00219760	22442	anr-19	0.490657	-3.10832	6.02288	0.516085	0.605795	NA
WBGene00019251	18228	H28G03.3	0.71509	-3.10832	6.02288	0.516085	0.605795	NA
WBGene00196675	43122	B0403.8	0.878562	-3.10818	5.98995	0.518898	0.603832	NA
WBGene00170615	17344	21ur-15001	0.471435	-3.10807	5.96517	0.521035	0.602342	NA
WBGene00047141	24241	21ur-2369	0.568926	-3.10718	5.78215	0.537374	0.591009	NA
WBGene00077758	24464	irld-12	0.940951	-3.10685	5.71794	0.543352	0.586888	NA
WBGene00198145	20358	E03A3.11	0.608302	-3.10618	5.59559	0.555112	0.578818	NA
WBGene00014403	27407	F56H6.14	0.608225	-3.10558	5.49219	0.565455	0.571765	NA
WBGene00008984	12590	F20E11.7	1.07315	-3.10546	5.47192	0.567527	0.570356	NA
WBGene00189955	42279	F40G9.19	0.74244	-3.10535	5.45308	0.569467	0.569039	NA
WBGene00005237	23044	srh-11	0.800158	-3.10469	5.34982	0.580336	0.561688	NA
WBGene00019027	22757	srb-12	1.15078	-3.10411	5.26356	0.589737	0.555367	NA
WBGene00008163	22575	C47F8.7	0.857952	-3.1039	5.23234	0.593214	0.553038	NA
WBGene00015530	23693	C06E4.1	0.907975	-3.10357	5.18696	0.598342	0.549612	NA
WBGene00020749	16717	srbc-67	0.920138	-3.10328	5.14622	0.603021	0.546495	NA
WBGene00019879	14769	R05D3.5	0.903088	-3.1032	5.13598	0.604208	0.545705	NA
WBGene00197623	43648	B0240.5	0.84749	-3.10271	5.07035	0.611931	0.540583	NA
WBGene00006164	21520	str-113	0.986428	-3.10171	4.94721	0.626961	0.530685	NA
WBGene00016830	23755	sre-55	1.04358	-3.10072	4.83447	0.641377	0.521277	NA
WBGene00005526	22007	sri-14	1.15055	-3.10032	4.79112	0.647097	0.517569	NA
WBGene00196261	12418	E02A10.6	0.676751	-3.10015	4.77355	0.649444	0.516051	NA
WBGene00009751	12609	F46A8.8	1.23029	-3.09985	4.74156	0.65376	0.513266	NA
WBGene00197630	13920	AH10.8	0.662029	-3.09969	4.72529	0.655978	0.511838	NA
WBGene00195407	11926	F08G5.9	0.68381	-3.0993	4.68665	0.661305	0.508417	NA
WBGene00006017	18537	srx-126	0.726201	-3.09917	4.67317	0.663183	0.507214	NA
WBGene00022005	13837	Y59H11AM.1	0.761975	-3.09775	4.53984	0.682347	0.495019	NA
WBGene00000709	26453	col-136	1.17931	-3.09754	4.52215	0.684971	0.493362	NA
WBGene00006673	21041	twk-20	0.837171	-3.09743	4.51191	0.686501	0.492397	NA
WBGene00018501	8816	F46F5.10	0.751084	-3.09726	4.49726	0.6887	0.491012	NA
WBGene00015764	21674	C14C6.13	0.799256	-3.09714	4.48657	0.690312	0.489998	NA
WBGene00235388	13966	W04C9.9	0.831334	-3.09668	4.44778	0.69623	0.486285	NA
WBGene00005398	21506	srh-183	1.05711	-3.09667	4.44741	0.696287	0.486249	NA
WBGene00021722	20615	srz-5	0.820191	-3.09594	4.38755	0.705619	0.480425	NA
WBGene00005591	7069	srj-1	0.772952	-3.0959	4.38505	0.706014	0.480179	NA
WBGene00219776	17943	AH9.9	0.816272	-3.0959	4.38404	0.706175	0.480079	NA
WBGene00023478	16753	srz-62	1.05515	-3.09582	4.37833	0.707077	0.479518	NA
WBGene00219691	13960	linc-106	2.22495	-3.09559	2.26722	1.36537	0.172138	NA
WBGene00014773	23649	F56D5.8	0.859885	-3.09531	4.33865	0.713428	0.475581	NA
WBGene00220135	12956	Y18D10A.29	0.817111	-3.09472	4.29355	0.720784	0.471042	NA
WBGene00196910	43242	H14A12.8	0.62581	-3.09179	4.09399	0.755203	0.450127	NA
WBGene00201900	7966	T21C9.17	1.48351	-3.09023	3.99986	0.772583	0.439769	NA
WBGene00044119	21247	srh-191	1.53764	-3.08927	3.94536	0.783012	0.43362	NA
WBGene00198081	19897	C09D8.8	0.918446	-3.08834	3.89507	0.792884	0.427845	NA
WBGene00020775	19291	T24E12.6	1.24069	-3.08824	3.88992	0.793909	0.427248	NA
WBGene00013281	19655	sre-27	1.33211	-3.08705	3.82854	0.806325	0.420055	NA
WBGene00235281	16952	Y4C6A.68	9.02005	-3.08528	1.81458	1.70027	0.0890797	0.367764
WBGene00016000	23716	C18H9.1	1.42245	-3.08375	3.67574	0.838947	0.401499	NA
WBGene00005382	19984	srh-166	1.97932	-3.08296	3.64209	0.846481	0.397284	NA
WBGene00219641	15450	linc-47	1.5472	-3.08162	3.58764	0.858955	0.390365	NA
WBGene00005370	23081	srh-154	1.201	-3.08088	3.55842	0.865799	0.3866	NA
WBGene00005030	19516	sra-4	2.34198	-3.07985	3.51975	0.875021	0.381562	NA
WBGene00045356	2963	T03E6.9	4.12749	-3.07965	1.78446	1.72581	0.0843812	0.356676
WBGene00077666	20214	M162.13	1.27091	-3.07843	3.4686	0.887514	0.374802	NA
WBGene00008889	9129	F16D3.6	5.01201	-3.07806	1.85164	1.66234	0.0964444	0.385524
WBGene00020291	23881	T06D4.2	1.21464	-3.07785	3.44807	0.892628	0.372056	NA
WBGene00022282	18832	Y74C10AR.2	9.23661	-3.07708	1.57203	1.9574	0.0503009	0.259822
WBGene00018496	17224	F46F5.5	1.63768	-3.07615	3.3914	0.907044	0.364384	NA
WBGene00013961	23578	ZK285.2	1.84088	-3.07596	3.38545	0.908581	0.363572	NA
WBGene00169846	24719	21ur-10165	1.43262	-3.07526	3.36325	0.914373	0.360521	NA
WBGene00043052	14825	srz-104	1.17453	-3.07516	3.36006	0.915211	0.360081	NA
WBGene00200719	26059	K11C4.10	1.19972	-3.074	3.32376	0.924856	0.355041	NA
WBGene00011246	23469	R11D1.7	2.05883	-3.0727	3.28612	0.935052	0.349761	NA
WBGene00016477	12234	srab-11	1.54887	-3.07234	3.27581	0.937888	0.348302	NA
WBGene00005973	23218	srx-82	1.50605	-3.07116	3.24281	0.947068	0.343604	NA
WBGene00021964	7893	Y57E12B.4	2.50446	-3.06871	3.17813	0.965572	0.334258	0.718983
WBGene00008941	27095	srz-33	1.31461	-3.06795	3.15884	0.971226	0.331436	NA
WBGene00235254	12959	F49D11.14	7.04523	-3.06769	1.40606	2.18176	0.0291273	0.183765
WBGene00019106	7847	irld-38	1.89241	-3.06532	3.09585	0.99014	0.322106	NA
WBGene00019202	12791	H14N18.2	1.43739	-3.06224	3.02762	1.01143	0.311809	NA
WBGene00005545	21509	sri-33	1.30574	-3.06036	2.98883	1.02393	0.305866	NA
WBGene00014861	12206	Y6B3B.2	1.62782	-3.05471	2.88257	1.05972	0.289272	NA
WBGene00195168	16829	T13C5.9	2.40975	-3.04931	2.47703	1.23104	0.218309	0.590427
WBGene00001785	10508	gst-37	2.46675	-3.04837	2.77927	1.09682	0.272718	0.65419
WBGene00017743	10771	F23F1.2	21.045	-3.04824	0.959032	3.17845	0.00148063	0.0204696
WBGene00013773	16082	Y116A8A.2	3.46006	-3.04225	2.69221	1.13002	0.258467	0.638973
WBGene00017295	8788	F09E10.5	1.82891	-3.04158	2.68325	1.13354	0.256986	NA
WBGene00235380	14963	C24D10.49	2.34077	-3.0401	2.66404	1.14116	0.253804	NA
WBGene00011046	9180	R05H10.7	12.594	-3.03623	1.06088	2.86199	0.00420992	0.0466889
WBGene00168375	9939	21ur-11860	1.88095	-3.03469	2.59839	1.16791	0.242842	NA
WBGene00008057	23306	irld-25	1.42559	-3.034	2.59039	1.17125	0.241498	NA
WBGene00017977	23423	F32B5.3	5.06711	-3.03284	1.50512	2.01502	0.0439024	0.238911
WBGene00012171	4720	W01B6.4	2.43555	-3.03083	2.55539	1.18605	0.235602	0.61239
WBGene00005289	8069	srh-68	2.61266	-3.0266	2.51153	1.20508	0.228171	0.6033
WBGene00195051	19867	T22D1.18	3.47357	-3.02485	2.49428	1.21271	0.225239	0.599317
WBGene00014906	10235	fbxa-109	1.92824	-3.02157	2.46329	1.22664	0.219958	NA
WBGene00220008	46613	K07C5.18	1.61505	-3.01507	2.40649	1.25289	0.210246	NA
WBGene00048104	12388	21ur-4875	0.937876	-3.0125	3.12509	0.96397	0.335061	NA
WBGene00018981	3840	F56F4.4	3.91529	-3.01162	2.37861	1.26613	0.205467	0.572459
WBGene00005592	18025	srj-4	4.45274	-3.00918	1.78724	1.6837	0.0922389	0.374621
WBGene00046372	21814	21ur-4897	9.52842	-3.00297	2.31437	1.29753	0.194449	0.557637
WBGene00015244	22188	B0524.5	9.70081	-3.00094	1.06485	2.81818	0.00482974	0.0517934
WBGene00200483	14435	Y32F6B.7	3.68749	-2.99747	2.27733	1.31622	0.1881	0.549273
WBGene00022642	2941	lipl-5	6534.19	-2.98948	0.31256	9.56452	1.12727e-21	2.50913e-19
WBGene00009114	10614	F25D7.5	3.663	-2.98845	2.22195	1.34496	0.178637	0.536127
WBGene00019309	18229	K02E7.4	3.79791	-2.98586	2.20718	1.3528	0.176121	0.532516
WBGene00017488	18731	dct-7	34.8686	-2.98268	0.882487	3.37985	0.000725246	0.0114817
WBGene00009600	7140	F40G12.5	3.85988	-2.97937	2.17207	1.37167	0.170165	0.524337
WBGene00008698	19588	F11D11.3	5.5091	-2.97275	2.13883	1.3899	0.16456	0.517022
WBGene00220177	17949	Y51H7BM.2	2.04102	-2.97192	2.24606	1.32317	0.185778	NA
WBGene00018810	19742	F54D10.9	3.45916	-2.97106	2.08416	1.42555	0.153999	0.499806
WBGene00045242	21809	C05B5.11	4.28652	-2.96867	1.55095	1.9141	0.0556074	0.275533
WBGene00235389	26918	C46G7.111	1.82139	-2.96275	2.07187	1.42999	0.15272	NA
WBGene00044358	13864	Y71G12B.33	6.81992	-2.96219	2.09045	1.41701	0.156479	0.503643
WBGene00015444	20080	C04F5.2	1.86939	-2.95999	2.41834	1.22397	0.220962	NA
WBGene00005687	15039	sru-24	4.37901	-2.95581	2.06363	1.43234	0.152047	0.496808
WBGene00011078	11663	R07B1.6	2.87777	-2.95379	2.01248	1.46774	0.142176	0.481713
WBGene00194667	22878	Y105C5A.1271	2.25527	-2.94749	2.23881	1.31655	0.187991	NA
WBGene00196471	22406	F57B1.10	2.65488	-2.94632	2.29123	1.28591	0.198475	0.563472
WBGene00005253	9580	srh-30	4.66334	-2.94613	1.82655	1.61295	0.106755	0.409604
WBGene00011243	17127	R11D1.2	10.2404	-2.94461	1.4533	2.02616	0.0427484	0.234731
WBGene00017199	17210	clec-45	6.01126	-2.94404	2.0183	1.45867	0.144655	0.485357
WBGene00012294	9209	nspa-8	71.6107	-2.9391	0.631027	4.65764	3.19854e-06	0.000105379
WBGene00001965	15002	hlh-26	3.75809	-2.93288	1.93448	1.51611	0.129492	0.456286
WBGene00018434	23809	ceh-81	1.22625	-2.93202	3.33571	0.878982	0.379411	NA
WBGene00045493	11892	F55G7.4	14.7658	-2.92424	0.913536	3.20101	0.00136948	0.0193413
WBGene00017267	27778	numr-2	14.8396	-2.89311	1.86666	1.54988	0.12117	0.440889
WBGene00014094	7241	ZK829.3	7.20064	-2.89198	1.67751	1.72397	0.084713	0.357664
WBGene00017815	21174	F26B1.1	4.87669	-2.88825	1.47239	1.96162	0.0498073	0.258777
WBGene00017270	23769	numr-1	17.0972	-2.88816	1.85478	1.55714	0.119436	0.437354
WBGene00168168	36274	21ur-6476	0.168845	-2.88744	6.03512	0.47844	0.632337	NA
WBGene00196113	42798	F13H6.6	0.218365	-2.88744	6.03512	0.47844	0.632337	NA
WBGene00171559	24794	21ur-6898	0.214432	-2.88744	6.03512	0.47844	0.632337	NA
WBGene00050772	18340	21ur-883	0.303263	-2.88744	6.03512	0.47844	0.632337	NA
WBGene00198216	43988	M88.10	0.734623	-2.88744	6.03511	0.47844	0.632337	NA
WBGene00197258	20340	C54G4.11	0.479954	-2.88739	5.97234	0.48346	0.628769	NA
WBGene00045151	28448	F17C11.14	0.603054	-2.88589	4.79982	0.60125	0.547674	NA
WBGene00166564	24567	21ur-10979	1.27544	-2.88183	4.01126	0.718436	0.472489	NA
WBGene00049470	16782	21ur-1041	0.887855	-2.88163	3.76626	0.765117	0.444202	NA
WBGene00219651	10464	linc-130	2.09324	-2.878	2.93955	0.979063	0.327549	NA
WBGene00219895	10970	F16A11.13	2.13113	-2.87061	2.44897	1.17217	0.241129	NA
WBGene00009690	2679	F44E5.3	4.06954	-2.86281	1.9061	1.50192	0.133118	0.463068
WBGene00007481	20020	C09F9.4	1.91217	-2.86226	2.66223	1.07514	0.282314	NA
WBGene00009646	10139	F42H11.1	9.8624	-2.84776	1.28498	2.21618	0.0266791	0.173414
WBGene00008620	10601	F09C6.10	11.1321	-2.83481	1.52787	1.85541	0.0635383	0.299203
WBGene00017231	5809	F07G11.4	3.37366	-2.81655	2.31401	1.21717	0.223539	0.596844
WBGene00016873	20568	C52B11.4	3.41019	-2.8046	2.56651	1.09277	0.274496	0.656031
WBGene00019253	19264	H31G24.1	1.42759	-2.80441	2.57143	1.09061	0.275446	NA
WBGene00017014	14239	dylt-2	2.12254	-2.7975	2.80645	0.996813	0.318855	NA
WBGene00005551	23123	sri-39	42.0305	-2.79725	1.9505	1.43412	0.151538	0.496299
WBGene00019562	22765	K09C6.8	16.1954	-2.79447	0.919683	3.03852	0.00237747	0.030051
WBGene00219241	22934	Y116A8A.150	2.37664	-2.79234	2.57086	1.08615	0.277412	0.65903
WBGene00015964	12719	glb-5	8.27685	-2.79183	1.68468	1.65719	0.0974808	0.387545
WBGene00044139	22348	F42D1.4	4.79713	-2.79118	1.69145	1.65017	0.0989081	0.389991
WBGene00220249	21445	R144.19	2.61734	-2.78589	2.57705	1.08104	0.279681	0.661534
WBGene00014191	23586	srt-22	12.3405	-2.78209	2.02579	1.37334	0.169647	0.523536
WBGene00020546	14303	zig-13	7.46716	-2.78205	2.02589	1.37325	0.169675	0.523536
WBGene00009967	13117	F53B7.4	4.6689	-2.77556	2.06176	1.34621	0.178235	0.535849
WBGene00023248	18301	C33E10.9	0.886979	-2.77542	5.13775	0.540202	0.589058	NA
WBGene00009398	7653	nspb-11	9.17268	-2.77263	2.0786	1.33389	0.182239	0.540794
WBGene00009758	22075	ttr-11	3.94571	-2.77062	2.0906	1.32528	0.185079	0.544761
WBGene00018168	15252	irld-7	9.28059	-2.76787	1.14456	2.41828	0.0155943	0.120335
WBGene00017500	12750	pud-2.2	146.024	-2.76783	0.375633	7.36844	1.72637e-13	1.74087e-11
WBGene00017869	8798	F28A10.1	10.2741	-2.76615	1.27866	2.16332	0.0305167	0.188939
WBGene00044911	19338	H38K22.6	11.2136	-2.76573	1.07838	2.5647	0.0103265	0.0894537
WBGene00077673	5458	B0563.10	9.25229	-2.76554	2.12172	1.30344	0.192425	0.555375
WBGene00044235	11873	C06A1.7	3.13783	-2.76279	2.13955	1.2913	0.196601	0.560772
WBGene00014678	7246	C15H7.2	4.71855	-2.76243	2.1417	1.28983	0.19711	0.561351
WBGene00235308	14459	C37C3.17	7.37524	-2.74848	2.24034	1.22681	0.219893	0.592503
WBGene00003333	22982	mir-239.2	3.08157	-2.74371	2.27819	1.20433	0.228461	0.603715
WBGene00077680	11401	F54F7.10	2.14924	-2.74018	2.17123	1.26204	0.206934	NA
WBGene00019508	17743	K07H8.8	2.82137	-2.73777	2.32791	1.17606	0.23957	0.617958
WBGene00045024	7434	C43F9.11	4.17502	-2.73616	2.34216	1.16822	0.242717	0.622044
WBGene00005745	23160	srv-34	4.62082	-2.73347	1.60021	1.7082	0.0875998	0.364235
WBGene00020669	23888	T22B2.5	3.30652	-2.73054	2.3942	1.14048	0.254085	0.634587
WBGene00044428	18856	T01D1.7	2.44734	-2.72814	2.41772	1.12839	0.259155	0.639352
WBGene00014805	15675	K08H10.5	2.64014	-2.72779	2.42123	1.12662	0.259905	0.639463
WBGene00012816	21111	scl-21	2.83497	-2.72709	2.42824	1.12307	0.261406	0.6406
WBGene00185095	15891	W09C2.7	2.96848	-2.72021	2.50115	1.08758	0.276779	0.658382
WBGene00007291	17552	lips-2	2.31546	-2.71977	2.50603	1.08529	0.277792	NA
WBGene00045148	21261	C06A1.8	2.24971	-2.71931	2.51127	1.08284	0.27888	NA
WBGene00021001	9370	W03F9.3	11.3723	-2.71584	1.30184	2.08615	0.0369648	0.212793
WBGene00012844	27249	Y43F11A.4	1.95637	-2.71492	2.56272	1.05939	0.289422	NA
WBGene00013754	23566	fbxa-116	1.92221	-2.71118	2.60904	1.03915	0.298736	NA
WBGene00011937	13674	ilc-17.1	2.45901	-2.70681	2.66693	1.01495	0.310128	0.694524
WBGene00005926	14054	srx-35	2.30574	-2.70484	2.69447	1.00385	0.31545	NA
WBGene00021120	21215	W09G12.6	2.00728	-2.7044	2.70084	1.00132	0.316674	NA
WBGene00198656	15925	Y37D8A.27	2.07097	-2.70403	2.70606	0.999251	0.317673	NA
WBGene00189931	21860	Y26G10.6	2.3922	-2.70383	2.70898	0.998098	0.318232	0.703192
WBGene00016912	11243	clec-86	65.1988	-2.70344	0.519144	5.2075	1.914e-07	7.99413e-06
WBGene00189953	8445	R155.5	1.85231	-2.70282	2.72383	0.992286	0.321058	NA
WBGene00044925	2961	Y37E3.20	1.50488	-2.6996	2.77258	0.973681	0.330215	NA
WBGene00008071	20500	fbxb-64	1.76298	-2.69793	2.7991	0.963856	0.335118	NA
WBGene00077757	466	E02H4.7	359.888	-2.69719	0.313971	8.59056	8.65499e-18	1.39797e-15
WBGene00044160	12363	W10C6.2	3.0522	-2.69678	1.88902	1.42761	0.153404	0.499007
WBGene00018000	15734	F33D11.1	1.8229	-2.69601	2.8306	0.95245	0.340869	NA
WBGene00023518	9910	srz-76	2.09714	-2.6945	2.85615	0.943402	0.345476	NA
WBGene00005263	14046	srh-40	1.57427	-2.6944	2.85777	0.942835	0.345766	NA
WBGene00200809	16398	T04C12.28	2.09863	-2.693	2.88212	0.934384	0.350106	NA
WBGene00008702	10604	clec-252	1.73896	-2.69208	2.89853	0.928777	0.353005	NA
WBGene00200931	20871	W07G4.11	1.22462	-2.69158	2.90774	0.925657	0.354624	NA
WBGene00005849	16519	srw-102	1.66593	-2.68985	2.93959	0.915043	0.360169	NA
WBGene00045339	13364	T10H4.13	1.50047	-2.68924	2.95115	0.911253	0.362162	NA
WBGene00015072	18163	srt-69	2.17099	-2.68891	2.95762	0.909146	0.363273	NA
WBGene00171393	10911	21ur-11668	1.05285	-2.68808	2.97351	0.904009	0.36599	NA
WBGene00008788	13092	F14D7.1	1.87048	-2.68737	2.98743	0.899558	0.368356	NA
WBGene00012285	14161	pitr-6	2.59118	-2.68682	2.99841	0.896082	0.370209	0.75022
WBGene00198826	25697	F43G9.16	1.58941	-2.68626	3.00988	0.892481	0.372135	NA
WBGene00005347	15527	srh-130	1.69893	-2.6856	3.02336	0.888282	0.374389	NA
WBGene00011566	8198	nhr-214	3.27335	-2.68552	3.02501	0.887772	0.374663	0.753071
WBGene00020829	19768	T26C11.3	1.91021	-2.68505	3.03466	0.884794	0.376268	NA
WBGene00006143	13057	str-84	2.01113	-2.68332	3.07133	0.873667	0.3823	NA
WBGene00022444	14812	Y110A2AL.7	2.30794	-2.68013	3.14291	0.852757	0.393794	NA
WBGene00005763	13049	srw-16	1.61585	-2.67973	3.15241	0.850056	0.395294	NA
WBGene00005840	19995	srw-93	1.95611	-2.6788	3.17446	0.843862	0.398746	NA
WBGene00008837	20504	sre-38	1.4849	-2.67837	3.18502	0.840927	0.400389	NA
WBGene00044545	28335	EGAP9.4	1.2405	-2.67818	3.18955	0.839673	0.401092	NA
WBGene00012482	10193	clec-106	3.39844	-2.67775	2.37345	1.12821	0.259232	0.639352
WBGene00007876	23300	dct-19	1.75925	-2.67698	3.21927	0.831548	0.405664	NA
WBGene00200754	45424	F45D3.12	1.52876	-2.6767	3.22614	0.829692	0.406713	NA
WBGene00019926	23863	fbxc-27	2.16301	-2.67568	3.25222	0.822726	0.410664	NA
WBGene00009766	15608	F46B3.15	1.59304	-2.67555	3.25581	0.821776	0.411205	NA
WBGene00049049	20200	21ur-1633	1.05022	-2.67447	3.28423	0.814335	0.415453	NA
WBGene00268190	20953	Y50D4B.10	1.64333	-2.67359	3.30814	0.808184	0.418984	NA
WBGene00019916	23862	R06B10.7	1.00902	-2.67311	3.321	0.804912	0.420871	NA
WBGene00021700	15819	Y48G9A.6	6.3568	-2.67295	1.33612	2.00054	0.0454425	0.243393
WBGene00005537	11054	sri-25	1.62404	-2.67192	3.3546	0.796495	0.425745	NA
WBGene00206508	16929	ZK262.19	1.26783	-2.67139	3.36984	0.792737	0.427931	NA
WBGene00196442	25276	T21B10.9	1.64623	-2.67014	3.4067	0.78379	0.433163	NA
WBGene00001733	19484	grl-24	1.10513	-2.66975	3.77906	0.706459	0.479902	NA
WBGene00011024	22622	R05A10.7	1.76781	-2.66892	3.44385	0.774984	0.438349	NA
WBGene00015999	22204	prmt-4	1.5542	-2.66827	3.46403	0.77028	0.441134	NA
WBGene00010166	23383	gmd-2	1.42929	-2.66761	3.4853	0.765388	0.44404	NA
WBGene00016213	19695	C29F5.5	0.906801	-2.66558	3.55247	0.750347	0.453046	NA
WBGene00010797	14627	srbc-75	1.48055	-2.66472	3.58225	0.743869	0.456956	NA
WBGene00013788	7234	Y116A8C.8	1.29893	-2.66471	3.58252	0.74381	0.456992	NA
WBGene00045198	12379	K10D11.7	1.84125	-2.66466	3.58434	0.743415	0.45723	NA
WBGene00014180	5259	ZK1010.6	1.44208	-2.66208	3.67831	0.723725	0.469235	NA
WBGene00009728	21579	sdz-19	6.92671	-2.66103	1.96522	1.35406	0.175717	0.532072
WBGene00017212	16674	F07E5.7	1.95191	-2.66058	3.73698	0.711961	0.476489	NA
WBGene00006229	13060	str-187	1.2924	-2.65988	3.76546	0.706388	0.479947	NA
WBGene00005538	17535	sri-26	2.1238	-2.65956	3.77838	0.703888	0.481503	NA
WBGene00219810	14456	mir-8196.2	1.00572	-2.65927	3.79034	0.701593	0.482933	NA
WBGene00016818	15237	C50E3.7	1.50068	-2.65924	3.7917	0.70133	0.483097	NA
WBGene00010069	11137	F54F11.1	5.90286	-2.65893	1.49657	1.77668	0.0756211	0.332828
WBGene00017579	19719	F18G5.1	1.19369	-2.6587	3.81457	0.696985	0.485812	NA
WBGene00009391	19605	F35C5.3	1.09654	-2.65836	3.829	0.694269	0.487514	NA
WBGene00005303	14528	srh-82	1.05227	-2.65826	3.83324	0.693476	0.488011	NA
WBGene00012384	23514	Y5F2A.3	1.53156	-2.65737	3.87256	0.686204	0.492584	NA
WBGene00008322	23318	C55A1.4	0.781977	-2.65573	3.94769	0.67273	0.501119	NA
WBGene00013089	7731	Y51B9A.7	1.17765	-2.6554	3.96334	0.669991	0.502864	NA
WBGene00001715	19482	grl-6	1.47117	-2.65468	3.99814	0.663978	0.506704	NA
WBGene00197534	19398	F38H4.13	0.838423	-2.65466	3.9994	0.663763	0.506842	NA
WBGene00009991	2690	F53F4.8	38.1478	-2.65456	0.661984	4.01001	6.07152e-05	0.00143546
WBGene00077504	19354	AC3.13	1.58568	-2.65407	4.02807	0.658894	0.509964	NA
WBGene00008294	19068	clec-11	1.54305	-2.65372	4.04607	0.655876	0.511904	NA
WBGene00014542	23621	W04G5.11	1.45351	-2.65363	4.05066	0.655111	0.512396	NA
WBGene00017543	21701	lgc-5	1.25251	-2.65351	4.05672	0.654102	0.513046	NA
WBGene00009979	20039	cutl-1	3.96792	-2.65315	1.63727	1.62047	0.105131	0.405849
WBGene00202141	16923	R06B10.8	0.950845	-2.65301	4.0829	0.649786	0.51583	NA
WBGene00255579	19454	mir-8194	0.911985	-2.65226	4.12266	0.643338	0.520005	NA
WBGene00171518	16253	21ur-8244	0.653406	-2.65216	4.12834	0.642428	0.520596	NA
WBGene00201129	16405	M02F4.11	0.929937	-2.65129	4.17623	0.634853	0.525525	NA
WBGene00020225	19280	sre-40	0.861853	-2.65082	4.20287	0.630716	0.528226	NA
WBGene00220138	46681	Y32F6B.8	0.888446	-2.6508	4.20402	0.630539	0.528342	NA
WBGene00017415	7816	F13A2.6	1.20486	-2.65028	4.23444	0.625886	0.53139	NA
WBGene00011127	4201	fbxb-79	1.07068	-2.64912	4.30389	0.615517	0.538213	NA
WBGene00007821	8608	clec-201	0.90023	-2.64859	4.33651	0.610767	0.541354	NA
WBGene00219763	20439	linc-94	0.969401	-2.64856	4.33849	0.61048	0.541544	NA
WBGene00005720	16006	srv-9	1.46856	-2.64789	4.38187	0.604283	0.545656	NA
WBGene00019566	23856	K09D9.3	0.926147	-2.64769	4.39477	0.602464	0.546866	NA
WBGene00201291	20883	K08B4.41	1.38162	-2.64664	4.46541	0.592698	0.553383	NA
WBGene00010715	19624	K09C8.2	0.817559	-2.64628	4.49068	0.589281	0.555673	NA
WBGene00200459	12936	F38H4.15	3.12543	-2.6451	1.72214	1.53594	0.124553	0.445928
WBGene00168785	20234	21ur-15355	0.755538	-2.64461	5.98194	0.4421	0.658417	NA
WBGene00197756	43729	ZC250.8	0.693686	-2.64394	4.66387	0.566899	0.570783	NA
WBGene00044963	28380	K07C5.11	2.39716	-2.64326	2.37187	1.11442	0.265099	0.644486
WBGene00198692	22908	C09H10.13	0.579556	-2.64322	4.72203	0.559763	0.575641	NA
WBGene00045158	28450	M163.14	0.608878	-2.64311	4.73095	0.558685	0.576377	NA
WBGene00194748	25011	F56F3.7	0.630253	-2.64289	4.74912	0.556502	0.577868	NA
WBGene00000026	22457	abu-3	1.07404	-2.64256	4.77627	0.55327	0.580078	NA
WBGene00016773	6790	oac-10	0.901947	-2.64071	4.94174	0.534368	0.593087	NA
WBGene00009909	18616	F49H6.8	1.0995	-2.64049	4.96212	0.53213	0.594636	NA
WBGene00005359	23077	srh-142	0.856548	-2.63959	5.05077	0.52261	0.601245	NA
WBGene00021172	27902	Y8A9A.3	1.0347	-2.63954	5.05592	0.522068	0.601623	NA
WBGene00005490	26685	srh-286	0.917068	-2.63873	5.13901	0.51347	0.607623	NA
WBGene00219222	16933	mir-4806	0.706505	-2.63857	5.1561	0.511737	0.608835	NA
WBGene00019453	11801	K06H6.5	0.821046	-2.63846	5.16689	0.510648	0.609597	NA
WBGene00005399	21008	srh-184	0.925086	-2.63834	5.18045	0.509288	0.610551	NA
WBGene00194746	18892	pals-20	0.766999	-2.63809	5.20778	0.506567	0.612459	NA
WBGene00011013	12634	srxa-8	0.839113	-2.63763	5.25888	0.501558	0.615978	NA
WBGene00005862	26780	srw-115	0.707854	-2.63733	5.2936	0.498211	0.618335	NA
WBGene00198966	9963	Y39E4B.17	0.767912	-2.63698	5.33468	0.494308	0.621089	NA
WBGene00198842	20376	K07E3.10	0.769868	-2.63652	5.38916	0.489227	0.624681	NA
WBGene00012614	23526	Y38H6A.3	0.758607	-2.63625	5.423	0.486123	0.62688	NA
WBGene00005307	26629	srh-86	0.708086	-2.63608	5.44438	0.484183	0.628256	NA
WBGene00195000	25026	F54D8.7	0.67208	-2.63573	5.48868	0.480212	0.631077	NA
WBGene00045589	24144	21ur-1571	0.719569	-2.6357	5.49296	0.479832	0.631347	NA
WBGene00010591	18628	K05D4.9	0.672972	-2.63544	5.52628	0.476892	0.633439	NA
WBGene00008671	27086	F11A5.3	1.26311	-2.63523	5.55498	0.47439	0.635222	NA
WBGene00005504	23113	srh-300	0.648956	-2.63485	5.60567	0.470034	0.638331	NA
WBGene00201589	8466	D1081.17	0.557979	-2.63445	5.66099	0.46537	0.641667	NA
WBGene00019685	21201	K12H6.5	0.586808	-2.63431	5.68111	0.463697	0.642865	NA
WBGene00199831	19408	F01E11.12	0.561497	-2.63346	5.80798	0.45342	0.650246	NA
WBGene00012264	10670	W04G5.3	1.05726	-2.6334	5.81746	0.452671	0.650785	NA
WBGene00019312	27853	K02E7.7	5.54346	-2.63317	1.1406	2.30859	0.0209665	0.147411
WBGene00005121	23021	srd-43	0.525966	-2.63307	5.86848	0.44868	0.653662	NA
WBGene00219280	18939	C05B5.16	0.957783	-2.63295	5.88676	0.447267	0.654682	NA
WBGene00206509	21941	Y102A5C.43	0.511569	-2.63281	5.90912	0.445551	0.655922	NA
WBGene00201075	26138	F25D7.9	0.4954	-2.63228	5.9976	0.438888	0.660742	NA
WBGene00174117	19855	21ur-7947	0.486285	-2.63213	6.02297	0.437015	0.662101	NA
WBGene00003310	20472	mir-82	0.139504	-2.63196	6.05177	0.434908	0.663629	NA
WBGene00005322	26635	srh-103	0.139504	-2.63196	6.05177	0.434908	0.663629	NA
WBGene00005450	23104	srh-244	0.139504	-2.63196	6.05177	0.434908	0.663629	NA
WBGene00005866	26784	srw-119	0.139504	-2.63196	6.05177	0.434908	0.663629	NA
WBGene00011785	23490	T15D6.11	0.139504	-2.63196	6.05177	0.434908	0.663629	NA
WBGene00012913	17636	Y46G5A.23	0.139504	-2.63196	6.05177	0.434908	0.663629	NA
WBGene00012945	23539	Y47H9A.1	0.139504	-2.63196	6.05177	0.434908	0.663629	NA
WBGene00016770	23752	C49C8.6	0.139504	-2.63196	6.05177	0.434908	0.663629	NA
WBGene00017527	27790	F16G10.13	0.139504	-2.63196	6.05177	0.434908	0.663629	NA
WBGene00017693	16680	flp-23	0.139504	-2.63196	6.05177	0.434908	0.663629	NA
WBGene00023364	28248	Y22D7AR.t1	0.139504	-2.63196	6.05177	0.434908	0.663629	NA
WBGene00046649	24202	21ur-2	0.139504	-2.63196	6.05177	0.434908	0.663629	NA
WBGene00047564	14368	21ur-767	0.139504	-2.63196	6.05177	0.434908	0.663629	NA
WBGene00049839	32391	21ur-2792	0.139504	-2.63196	6.05177	0.434908	0.663629	NA
WBGene00165440	33849	21ur-14638	0.139504	-2.63196	6.05177	0.434908	0.663629	NA
WBGene00168598	36658	21ur-11312	0.139504	-2.63196	6.05177	0.434908	0.663629	NA
WBGene00168823	36861	21ur-8307	0.139504	-2.63196	6.05177	0.434908	0.663629	NA
WBGene00172142	39758	21ur-7205	0.139504	-2.63196	6.05177	0.434908	0.663629	NA
WBGene00173072	40565	21ur-8484	0.139504	-2.63196	6.05177	0.434908	0.663629	NA
WBGene00194867	42303	W09C2.10	0.139504	-2.63196	6.05177	0.434908	0.663629	NA
WBGene00195302	25047	ZK1131.2	0.139504	-2.63196	6.05177	0.434908	0.663629	NA
WBGene00195915	25169	C07H6.11	0.139504	-2.63196	6.05177	0.434908	0.663629	NA
WBGene00196072	25195	Y39A3B.6	0.139504	-2.63196	6.05177	0.434908	0.663629	NA
WBGene00197395	14412	Y57A10A.40	0.139504	-2.63196	6.05177	0.434908	0.663629	NA
WBGene00197585	21890	T08G11.8	0.139504	-2.63196	6.05177	0.434908	0.663629	NA
WBGene00197752	43725	F46F3.9	0.139504	-2.63196	6.05177	0.434908	0.663629	NA
WBGene00198277	20798	B0041.10	0.139504	-2.63196	6.05177	0.434908	0.663629	NA
WBGene00198380	20800	T22B7.13	0.139504	-2.63196	6.05177	0.434908	0.663629	NA
WBGene00198526	44154	C10G8.9	0.139504	-2.63196	6.05177	0.434908	0.663629	NA
WBGene00199882	25915	F47C8.4	0.139504	-2.63196	6.05177	0.434908	0.663629	NA
WBGene00200547	26031	F49E10.21	0.139504	-2.63196	6.05177	0.434908	0.663629	NA
WBGene00201166	26150	B0350.79	0.139504	-2.63196	6.05177	0.434908	0.663629	NA
WBGene00201507	16420	K03H4.7	0.139504	-2.63196	6.05177	0.434908	0.663629	NA
WBGene00201751	45986	W08F4.19	0.139504	-2.63196	6.05177	0.434908	0.663629	NA
WBGene00202223	20917	K10G6.8	0.139504	-2.63196	6.05177	0.434908	0.663629	NA
WBGene00199166	25767	K08F8.11	0.230678	-2.63196	6.05177	0.434908	0.663629	NA
WBGene00015773	23704	C14E2.4	0.237196	-2.63196	6.05177	0.434908	0.663629	NA
WBGene00077635	19842	Y46G5A.42	0.237196	-2.63196	6.05177	0.434908	0.663629	NA
WBGene00195252	20281	K10D6.6	0.257696	-2.63196	6.05177	0.434908	0.663629	NA
WBGene00219706	46490	linc-158	0.257696	-2.63196	6.05177	0.434908	0.663629	NA
WBGene00200418	17409	C05H8.4	0.237437	-2.63196	6.05177	0.434908	0.663629	NA
WBGene00005376	26649	srh-160	0.265117	-2.63196	6.05177	0.434908	0.663629	NA
WBGene00196392	42950	ZC487.7	0.265117	-2.63196	6.05177	0.434908	0.663629	NA
WBGene00269332	494	Y39F10A.6	0.265117	-2.63196	6.05177	0.434908	0.663629	NA
WBGene00005383	19526	srh-167	0.246815	-2.63196	6.05177	0.434908	0.663629	NA
WBGene00005901	23202	srx-10	0.246815	-2.63196	6.05177	0.434908	0.663629	NA
WBGene00014897	23663	Y43F8C.t9	0.246815	-2.63196	6.05177	0.434908	0.663629	NA
WBGene00017585	27793	F19B10.3	0.246815	-2.63196	6.05177	0.434908	0.663629	NA
WBGene00021821	27934	Y54B9A.1	0.246815	-2.63196	6.05177	0.434908	0.663629	NA
WBGene00013494	23557	irld-58	0.244196	-2.63196	6.05177	0.434908	0.663629	NA
WBGene00013468	16628	srz-96	0.269047	-2.63196	6.05177	0.434908	0.663629	NA
WBGene00200723	26062	T23E1.6	0.269047	-2.63196	6.05177	0.434908	0.663629	NA
WBGene00200008	25933	Y54G2A.66	0.328712	-2.63196	6.05177	0.434908	0.663629	NA
WBGene00200950	26113	T06H11.19	0.328712	-2.63196	6.05177	0.434908	0.663629	NA
WBGene00198848	44336	B0205.16	0.316792	-2.63196	6.05177	0.434908	0.663629	NA
WBGene00197075	25396	C01F6.12	0.320503	-2.63196	6.05177	0.434908	0.663629	NA
WBGene00197206	8459	C15B12.11	0.300471	-2.63196	6.05177	0.434908	0.663629	NA
WBGene00005260	19522	srh-37	0.337587	-2.63196	6.05177	0.434908	0.663629	NA
WBGene00199354	14426	C31H1.97	0.321852	-2.63196	6.05177	0.434908	0.663629	NA
WBGene00005123	23022	srd-45	0.344508	-2.63196	6.05177	0.434908	0.663629	NA
WBGene00195858	42660	F48C11.6	0.348888	-2.63196	6.05177	0.434908	0.663629	NA
WBGene00199550	16372	K02E10.9	0.383339	-2.63196	6.05177	0.434908	0.663629	NA
WBGene00005610	16003	srj-22	0.4422	-2.63196	6.05177	0.434908	0.663629	NA
WBGene00165037	24475	21ur-8299	0.649962	-2.63196	6.05177	0.434908	0.663629	NA
WBGene00005035	17531	sra-9	0.365008	-2.63196	6.05177	0.434908	0.663629	NA
WBGene00007995	27062	C37E2.3	0.341888	-2.63196	6.05177	0.434908	0.663629	NA
WBGene00010956	23457	M199.8	0.427754	-2.63196	6.05177	0.434908	0.663629	NA
WBGene00195528	15899	K08B5.3	0.351507	-2.63196	6.05177	0.434908	0.663629	NA
WBGene00169778	24715	21ur-5809	0.419097	-2.63196	6.05177	0.434908	0.663629	NA
WBGene00047952	30700	21ur-1957	0.400353	-2.63196	6.05177	0.434908	0.663629	NA
WBGene00202346	16926	Y105E8B.14	0.438511	-2.63196	6.05177	0.434908	0.663629	NA
WBGene00010588	23398	srz-14	0.571474	-2.63196	6.05177	0.434908	0.663629	NA
WBGene00022407	14811	srsx-4	0.542993	-2.63196	6.05177	0.434908	0.663629	NA
WBGene00013105	27259	fip-7	0.552157	-2.63196	6.05177	0.434908	0.663629	NA
WBGene00045132	28438	ZK643.9	0.45443	-2.63196	6.05177	0.434908	0.663629	NA
WBGene00044286	15847	ugt-35	0.432221	-2.63196	6.05177	0.434908	0.663629	NA
WBGene00050891	24426	C08E8.9	0.734505	-2.63196	6.05177	0.434908	0.663629	NA
WBGene00015772	27721	C14E2.3	0.467501	-2.63196	6.05177	0.434908	0.663629	NA
WBGene00000700	5004	col-126	0.693016	-2.63196	6.05177	0.434908	0.663629	NA
WBGene00018649	21189	F49F1.9	0.729319	-2.63196	6.05177	0.434908	0.663629	NA
WBGene00219318	17938	R08A2.9	0.626649	-2.63196	6.05177	0.434908	0.663629	NA
WBGene00195036	17889	T08D2.10	0.61718	-2.63196	6.05177	0.434908	0.663629	NA
WBGene00018973	6368	srz-20	0.685155	-2.63196	6.05177	0.434908	0.663629	NA
WBGene00044184	28313	F11A5.16	0.208539	-2.63196	6.05177	0.434908	0.66363	NA
WBGene00169835	37736	21ur-8043	0.208539	-2.63196	6.05177	0.434908	0.66363	NA
WBGene00219263	46449	mir-4931	0.189025	-2.63196	6.05177	0.434908	0.66363	NA
WBGene00014523	27497	T20D3.13	0.185091	-2.63196	6.05177	0.434908	0.66363	NA
WBGene00005851	26774	srw-104	0.18835	-2.63196	6.05177	0.434908	0.66363	NA
WBGene00197164	43377	T19D12.13	0.18835	-2.63196	6.05177	0.434908	0.66363	NA
WBGene00008268	21057	srt-32	0.1986	-2.63196	6.05177	0.434908	0.66363	NA
WBGene00077613	14856	F21H7.16	0.1986	-2.63196	6.05177	0.434908	0.66363	NA
WBGene00003273	13012	mir-45	0.20231	-2.63196	6.05177	0.434908	0.66363	NA
WBGene00049863	32412	21ur-3125	0.20231	-2.63196	6.05177	0.434908	0.66363	NA
WBGene00189986	14890	C53D6.16	0.20231	-2.63196	6.05177	0.434908	0.66363	NA
WBGene00201648	26223	C18F3.12	0.20231	-2.63196	6.05177	0.434908	0.66363	NA
WBGene00200874	17917	C04A2.11	0.19316	-2.63196	6.05177	0.434908	0.66363	NA
WBGene00201923	46083	K10D6.23	0.19316	-2.63196	6.05177	0.434908	0.66363	NA
WBGene00174309	16268	21ur-14325	0.257385	-2.63196	6.05177	0.434908	0.66363	NA
WBGene00077707	24460	mir-1829.3	0.248121	-2.63196	6.05177	0.434908	0.66363	NA
WBGene00173505	24913	21ur-15575	0.251156	-2.63196	6.05177	0.434908	0.66363	NA
WBGene00201731	45973	Y67D8A.9	0.254656	-2.63196	6.05177	0.434908	0.66363	NA
WBGene00200833	26084	D2092.14	0.287764	-2.63196	6.05177	0.434908	0.66363	NA
WBGene00019784	19275	M70.2	0.290892	-2.63196	6.05177	0.434908	0.66363	NA
WBGene00197209	15913	C34B4.11	0.296336	-2.63196	6.05177	0.434908	0.66363	NA
WBGene00021617	19302	Y47D7A.3	0.293042	-2.63196	6.05177	0.434908	0.66363	NA
WBGene00201717	14944	C41G11.18	0.377559	-2.63196	6.05177	0.434908	0.66363	NA
WBGene00044982	28393	C01A2.8	0.34142	-2.63196	6.05177	0.434908	0.66363	NA
WBGene00050300	32807	21ur-170	0.332406	-2.63196	6.05177	0.434908	0.66363	NA
WBGene00045898	18868	21ur-1647	0.349948	-2.63196	6.05177	0.434908	0.66363	NA
WBGene00013467	17151	Y68A4A.5	0.88711	-2.63196	6.05177	0.434908	0.66363	NA
WBGene00046222	13371	21ur-5453	0.429803	-2.63196	6.05177	0.434908	0.66363	NA
WBGene00255568	46793	mir-8204	0.379739	-2.63196	6.05177	0.434908	0.66363	NA
WBGene00166374	20687	21ur-13227	0.384199	-2.63196	6.05177	0.434908	0.66363	NA
WBGene00005827	9584	srw-80	0.661794	-2.63196	6.05177	0.434908	0.66363	NA
WBGene00020523	7872	dmsr-14	0.421062	-2.63196	6.05177	0.434908	0.66363	NA
WBGene00021737	8879	Y50D4A.3	0.497418	-2.63196	6.05177	0.434908	0.66363	NA
WBGene00023508	24034	srz-38	0.447724	-2.63196	6.05177	0.434908	0.66363	NA
WBGene00165442	33851	21ur-11196	0.550384	-2.63196	6.05177	0.434908	0.66363	NA
WBGene00199603	18414	F13G11.144	0.578264	-2.63196	6.05177	0.434908	0.66363	NA
WBGene00018059	23798	F35F10.10	0.539709	-2.63196	6.05177	0.434908	0.66363	NA
WBGene00219735	46492	linc-150	0.614079	-2.63196	6.05177	0.434908	0.66363	NA
WBGene00005244	17022	srh-19	0.617912	-2.63196	6.05177	0.434908	0.66363	NA
WBGene00021488	23921	srab-23	0.432581	-2.63196	6.05177	0.434908	0.66363	NA
WBGene00019178	23841	scl-12	0.538639	-2.63196	6.05177	0.434908	0.66363	NA
WBGene00171438	24790	21ur-7393	0.668158	-2.63196	6.05177	0.434908	0.66363	NA
WBGene00195536	42479	C55A6.14	0.722665	-2.63196	6.05177	0.434908	0.66363	NA
WBGene00077493	21285	F09C6.16	0.735341	-2.63196	6.05177	0.434908	0.66363	NA
WBGene00201333	26176	H40L08.5	0.793792	-2.63196	6.05177	0.434908	0.66363	NA
WBGene00017876	23789	F28A10.8	0.868897	-2.63196	6.05177	0.434908	0.66363	NA
WBGene00046053	28991	21ur-3599	0.186179	-2.63196	6.05176	0.434907	0.66363	NA
WBGene00199562	44738	T27B1.6	0.186179	-2.63196	6.05176	0.434907	0.66363	NA
WBGene00166886	21841	21ur-6310	0.2357	-2.63196	6.05176	0.434907	0.66363	NA
WBGene00171336	39053	21ur-9710	0.239835	-2.63196	6.05176	0.434907	0.66363	NA
WBGene00045141	16773	Y53F4B.47	0.238525	-2.63196	6.05176	0.434907	0.66363	NA
WBGene00005684	3595	sru-21	0.288046	-2.63196	6.05176	0.434907	0.66363	NA
WBGene00173429	40880	21ur-12267	0.412988	-2.63196	6.05176	0.434907	0.66363	NA
WBGene00012841	27248	Y43F11A.1	0.392532	-2.63196	6.05176	0.434907	0.66363	NA
WBGene00014291	27328	C52E4.8	0.406873	-2.63196	6.05176	0.434907	0.66363	NA
WBGene00010748	27159	K10D11.4	0.232854	-2.63196	6.05176	0.434908	0.66363	NA
WBGene00016300	23726	C32B5.7	0.232854	-2.63196	6.05176	0.434908	0.66363	NA
WBGene00200941	19914	T25C12.9	0.232854	-2.63196	6.05176	0.434908	0.66363	NA
WBGene00001918	4530	his-44	0.458358	-2.63196	6.05176	0.434908	0.66363	NA
WBGene00007468	15070	C08H9.8	0.524861	-2.63196	6.05176	0.434908	0.66363	NA
WBGene00014862	21131	Y7A9C.2	0.532931	-2.63196	6.05176	0.434908	0.66363	NA
WBGene00198201	17388	F59H5.5	0.640322	-2.63196	6.05176	0.434908	0.66363	NA
WBGene00014656	27590	B0399.t13	0.225076	-2.63196	6.05176	0.434907	0.66363	NA
WBGene00049713	32272	21ur-4544	0.225076	-2.63196	6.05176	0.434907	0.66363	NA
WBGene00199067	44452	Y39B6A.82	0.225076	-2.63196	6.05176	0.434907	0.66363	NA
WBGene00005137	26601	srd-60	0.342957	-2.63196	6.05176	0.434907	0.66363	NA
WBGene00021570	27925	srd-73	0.342957	-2.63196	6.05176	0.434907	0.66363	NA
WBGene00171154	38892	21ur-9263	0.391483	-2.63196	6.05176	0.434907	0.66363	NA
WBGene00197697	43694	B0432.19	0.278441	-2.63196	6.05176	0.434907	0.66363	NA
WBGene00196322	42920	R05F9.14	0.512248	-2.63196	6.05176	0.434907	0.66363	NA
WBGene00045051	28409	K11H12.13	0.447048	-2.63196	6.05176	0.434907	0.66363	NA
WBGene00235372	12464	F15E6.12	0.40834	-2.63196	6.05176	0.434907	0.66363	NA
WBGene00015835	27724	math-6	0.508553	-2.63196	6.05176	0.434907	0.66363	NA
WBGene00043328	28292	F45D11.11	0.508553	-2.63196	6.05176	0.434907	0.66363	NA
WBGene00005820	18028	srw-73	0.515071	-2.63196	6.05176	0.434907	0.66363	NA
WBGene00005080	13039	srd-2	0.559129	-2.63196	6.05176	0.434907	0.66363	NA
WBGene00220009	10468	K07E1.2	0.506505	-2.63196	6.05176	0.434907	0.66363	NA
WBGene00173663	24923	21ur-9869	0.573688	-2.63196	6.05176	0.434907	0.66363	NA
WBGene00199952	44966	F47C8.5	0.375051	-2.63196	6.05176	0.434907	0.66363	NA
WBGene00005230	23043	srh-4	0.403998	-2.63196	6.05176	0.434907	0.66363	NA
WBGene00006112	11061	str-47	0.403998	-2.63196	6.05176	0.434907	0.66363	NA
WBGene00014744	8738	F25H9.9	0.748574	-2.63196	6.05176	0.434907	0.66363	NA
WBGene00005215	23041	srg-58	0.517247	-2.63196	6.05176	0.434907	0.66363	NA
WBGene00006268	16528	str-240	0.710035	-2.63196	6.05176	0.434907	0.66363	NA
WBGene00197667	25486	R160.8	0.705789	-2.63196	6.05176	0.434907	0.66363	NA
WBGene00005556	16514	sri-44	0.677176	-2.63196	6.05176	0.434907	0.66363	NA
WBGene00219580	9463	linc-18	0.712032	-2.63195	6.05176	0.434907	0.66363	NA
WBGene00197503	18395	C45E1.7	0.937471	-2.63182	3.14658	0.836407	0.402926	NA
WBGene00021591	20126	Y46D2A.3	3.44939	-2.61331	2.51379	1.03959	0.29853	0.681778
WBGene00010880	2717	M05D6.8	8.6922	-2.61124	1.36549	1.91231	0.0558363	0.27581
WBGene00019755	8845	M03E7.3	3.48042	-2.60713	1.57516	1.65515	0.0978941	0.388174
WBGene00010034	203	F54B11.11	99.9444	-2.60687	0.364641	7.14916	8.73102e-13	7.70979e-11
WBGene00044279	2454	grl-32	11.7275	-2.60687	1.26238	2.06504	0.0389193	0.220813
WBGene00017490	19716	pud-2.1	175.421	-2.60567	0.355403	7.3316	2.27419e-13	2.2559e-11
WBGene00018643	10309	drd-50	478.411	-2.592	0.33417	7.75654	8.72746e-15	1.04798e-12
WBGene00200164	14432	T14G10.10	2.44136	-2.57369	2.32836	1.10537	0.269	0.649958
WBGene00007742	8113	C26C6.8	5.36158	-2.56624	1.96936	1.30308	0.192546	0.555375
WBGene00016242	4307	C30A5.10	8.69681	-2.55846	1.82367	1.40292	0.16064	0.509962
WBGene00199973	15428	Y73B6BL.281	1.22464	-2.54765	2.6895	0.947257	0.343508	NA
WBGene00200616	14932	F56B3.15	4.10053	-2.54764	1.73024	1.47242	0.140908	0.47884
WBGene00000722	5505	col-149	1225.29	-2.54676	0.281558	9.04524	1.49341e-19	2.7814e-17
WBGene00044751	21799	F14D2.16	1.90143	-2.5457	2.63586	0.965793	0.334148	NA
WBGene00044036	15844	ZK673.12	2.88107	-2.54082	2.40472	1.0566	0.290696	0.672809
WBGene00195011	7455	ZK180.8	5.61358	-2.53745	1.44694	1.75367	0.079487	0.344117
WBGene00015997	6764	C18H7.7	19.7037	-2.53495	1.04425	2.42752	0.0152023	0.118083
WBGene00017056	21694	D2062.4	13.5615	-2.5334	1.12912	2.24368	0.0248528	0.165371
WBGene00005845	5573	srw-98	1.70266	-2.53234	3.8161	0.663593	0.506951	NA
WBGene00011084	15631	srsx-21	1.32567	-2.53212	3.90231	0.648876	0.516419	NA
WBGene00006110	26962	str-45	1.75065	-2.53063	2.70898	0.934162	0.35022	NA
WBGene00219591	16447	linc-149	1.31047	-2.52302	2.45481	1.02779	0.304051	NA
WBGene00007538	15071	C12D8.9	9.63701	-2.52291	1.01967	2.47424	0.0133521	0.106981
WBGene00021653	7890	Y47G6A.30	13.7312	-2.52199	1.21923	2.06851	0.038592	0.219502
WBGene00012246	16610	fbxa-131	3.44511	-2.52191	1.8773	1.34337	0.179151	0.536748
WBGene00011728	7702	T12A7.7	5.09889	-2.51994	1.8808	1.33983	0.180302	0.53794
WBGene00013058	18135	clec-247	7.98757	-2.51697	1.92384	1.30831	0.190768	0.552419
WBGene00048234	10403	21ur-684	0.69613	-2.51155	5.98881	0.419373	0.674943	NA
WBGene00005242	14527	srh-17	6.78955	-2.51115	1.60502	1.56456	0.117685	0.433763
WBGene00022316	19792	Y81B9A.2	2.87024	-2.49641	2.36379	1.0561	0.29092	0.673159
WBGene00022083	2427	Y69A2AR.12	156.258	-2.48968	0.313463	7.94251	1.98132e-15	2.46007e-13
WBGene00013060	23541	Y51A2A.4	6.27508	-2.48942	1.82884	1.3612	0.173451	0.528784
WBGene00013592	11197	Y81G3A.4	24.3774	-2.48746	0.846385	2.93892	0.00329359	0.0385876
WBGene00045373	28506	Y46G5A.40	0.557869	-2.47383	5.9866	0.413228	0.679439	NA
WBGene00023193	28162	Y74C9A.6	3.42059	-2.47282	1.8687	1.32328	0.185741	0.545652
WBGene00235287	16955	Y55F3C.17	1.64645	-2.47257	3.21669	0.768668	0.44209	NA
WBGene00045348	28495	C14A6.10	7.34032	-2.46848	1.13478	2.17529	0.0296086	0.185754
WBGene00001710	7022	grl-1	12.1969	-2.46189	0.977936	2.51743	0.0118214	0.0977579
WBGene00005196	21002	srg-39	4.76204	-2.45625	1.86621	1.31617	0.188117	0.549273
WBGene00012036	12162	clec-103	3.42201	-2.45221	1.72968	1.41772	0.156271	0.503311
WBGene00009782	17096	F46C5.7	8.83885	-2.44658	0.945278	2.58821	0.00964765	0.084985
WBGene00005905	26797	srx-14	1.64332	-2.44615	2.66301	0.918567	0.358322	NA
WBGene00013085	12668	mpz-6	19.2825	-2.43391	1.11119	2.19036	0.0284983	0.181174
WBGene00045180	12883	K07F5.17	6.82105	-2.43331	1.09475	2.2227	0.0262357	0.171646
WBGene00015910	2816	C17F4.2	21.5656	-2.42787	1.0881	2.23129	0.0256622	0.169322
WBGene00219912	13963	F22H10.10	14.2476	-2.42732	0.828451	2.92995	0.00339014	0.0394527
WBGene00195728	13411	T28D9.13	1.38417	-2.42724	2.4837	0.977269	0.328436	NA
WBGene00022746	13332	ZK470.4	1.84992	-2.42709	2.37656	1.02126	0.30713	NA
WBGene00016660	9786	C45B2.3	20.1566	-2.42651	1.29036	1.88049	0.0600409	0.288995
WBGene00220032	490	M7.15	1.41098	-2.42642	2.9813	0.813879	0.415714	NA
WBGene00044943	24097	R151.12	1.92074	-2.42641	2.21983	1.09306	0.274365	NA
WBGene00194677	13899	D1054.19	8.19302	-2.42179	1.62644	1.48902	0.136483	0.470016
WBGene00006169	19544	str-118	5.8048	-2.42173	1.5954	1.51794	0.129029	0.455653
WBGene00011448	17128	tag-348	4.35223	-2.42138	1.33928	1.80797	0.0706116	0.318632
WBGene00009501	10623	F37A8.1	15.9539	-2.4208	0.921053	2.62829	0.00858146	0.0778087
WBGene00008373	10113	D1054.6	2.25407	-2.41986	2.29579	1.05404	0.291862	NA
WBGene00045305	4957	ZC250.4	1077.57	-2.41542	0.188109	12.8405	9.72425e-38	5.54647e-35
WBGene00007853	8117	C31G12.4	18.0158	-2.40704	1.06581	2.25841	0.0239204	0.160631
WBGene00011405	7697	clec-155	10.611	-2.39815	1.16212	2.06361	0.0390548	0.221319
WBGene00011001	7688	R04B5.1	4.31967	-2.39535	1.84693	1.29694	0.194653	0.558004
WBGene00010636	9172	K07F5.8	15.7188	-2.39425	0.852805	2.8075	0.00499272	0.0529193
WBGene00043981	15842	T14E8.4	63.6233	-2.39208	0.486768	4.91421	8.9139e-07	3.31358e-05
WBGene00020292	10818	nep-19	6.80544	-2.38906	1.15495	2.06853	0.03859	0.219502
WBGene00009193	6644	F27E5.3	26.761	-2.38779	0.764925	3.1216	0.00179868	0.0238587
WBGene00022771	5438	ZK616.1	36.6131	-2.38588	0.57937	4.11807	3.82066e-05	0.000946197
WBGene00009213	12596	thn-1	119.959	-2.38571	0.380967	6.26224	3.79479e-10	2.5941e-08
WBGene00020285	8853	T06A10.2	15.8106	-2.38396	0.781865	3.04907	0.00229552	0.0292787
WBGene00017499	8792	pud-1.1	95.1886	-2.38285	0.308913	7.71366	1.22256e-14	1.42128e-12
WBGene00004789	87	sgk-1	1197.12	-2.37737	0.143442	16.5737	1.07899e-61	1.5149e-58
WBGene00007246	12059	nspb-10	9.33681	-2.37677	1.43024	1.6618	0.0965538	0.385595
WBGene00195757	25137	T06A10.105	3.84075	-2.37315	1.71877	1.38072	0.167365	0.520725
WBGene00175028	24995	nspe-8	58.5581	-2.37226	1.66764	1.42252	0.154875	0.500757
WBGene00077522	3959	T10D4.15	8.95102	-2.36794	1.10278	2.14725	0.031773	0.193871
WBGene00006226	22532	str-182	12.1083	-2.36647	1.38437	1.70942	0.0873735	0.363598
WBGene00189987	16277	C18H7.12	3.161	-2.36466	1.83499	1.28865	0.197519	0.561894
WBGene00013911	13714	irld-60	3.70035	-2.35289	1.79125	1.31354	0.189	0.549806
WBGene00008306	19582	C54E10.1	2.03702	-2.35089	1.99704	1.17719	0.23912	NA
WBGene00045279	13870	B0513.12	12.8708	-2.34992	1.09318	2.14961	0.0315865	0.193333
WBGene00044951	20166	2RSSE.3	1.60538	-2.34909	2.89778	0.810649	0.417567	NA
WBGene00174936	18889	21ur-8714	0.971415	-2.34274	2.55522	0.916845	0.359224	NA
WBGene00017788	22243	F25E5.7	17.2369	-2.34243	0.95942	2.44151	0.014626	0.115216
WBGene00022890	3935	fbxa-224	14.2497	-2.33955	0.903785	2.58861	0.00963637	0.084985
WBGene00021997	11853	Y59E9AR.1	28.0867	-2.33727	0.680513	3.43458	0.000593482	0.00973247
WBGene00194866	12909	Y41C4A.22	1.74933	-2.33248	2.33985	0.99685	0.318837	NA
WBGene00220145	46685	Y39A3CR.11	0.89707	-2.33236	4.0607	0.574375	0.565714	NA
WBGene00168999	24667	21ur-10758	1.9635	-2.32758	2.4766	0.939831	0.347304	NA
WBGene00021236	18807	pud-1.2	116.729	-2.32373	0.343538	6.76411	1.34127e-11	1.10274e-09
WBGene00012870	9221	Y45F10B.2	3.61196	-2.32262	1.74229	1.33308	0.182505	0.541024
WBGene00004052	2067	parg-2	2475.49	-2.32245	0.313951	7.39747	1.38807e-13	1.4075e-11
WBGene00021772	1420	math-45	17.5074	-2.31943	0.712591	3.25492	0.00113422	0.0165482
WBGene00020961	13821	sknr-1	6.48532	-2.31106	1.416	1.63211	0.102657	0.399339
WBGene00220257	13462	C02H6.3	3.19611	-2.31103	2.04574	1.12968	0.258612	0.639246
WBGene00011255	12145	R12H7.4	2.74048	-2.31048	2.05719	1.12313	0.261384	0.6406
WBGene00189950	10421	C39B5.14	29.7796	-2.30671	0.610469	3.77858	0.000157723	0.00319863
WBGene00015261	7770	B0563.1	9.96967	-2.29867	1.20588	1.90622	0.0566219	0.278037
WBGene00007768	27056	C27C7.5	1.49615	-2.29485	3.07326	0.746714	0.455236	NA
WBGene00008754	18586	F13E9.5	37.1593	-2.29074	0.639816	3.58031	0.000343187	0.00617736
WBGene00012189	7708	W02A2.4	18.5486	-2.29029	0.766289	2.98881	0.00280064	0.0338525
WBGene00006285	23272	str-259	1.47905	-2.2832	3.97409	0.57452	0.565616	NA
WBGene00012190	2235	W02A2.5	4.91797	-2.2801	1.63529	1.39431	0.163224	0.514525
WBGene00018375	842	F43C9.1	139.745	-2.27597	0.505034	4.50657	6.58841e-06	0.00020042
WBGene00020177	9352	T02H6.7	14.4669	-2.27515	0.829684	2.74219	0.00610302	0.0610369
WBGene00019089	9332	clec-206	5.44173	-2.27469	1.36267	1.66929	0.0950602	0.381411
WBGene00019311	14277	K02E7.6	219.153	-2.27207	0.419357	5.41798	6.02773e-08	2.7996e-06
WBGene00021620	22320	Y47D7A.7	6.66616	-2.26276	2.1976	1.02965	0.303174	0.686508
WBGene00006038	6578	ssp-9	56.1983	-2.26008	0.463753	4.87345	1.09666e-06	3.97936e-05
WBGene00020598	17251	T20B6.2	9.74108	-2.25886	1.2896	1.7516	0.079843	0.345167
WBGene00011321	11154	fil-1	55.7097	-2.25836	0.541763	4.16853	3.06567e-05	0.000781489
WBGene00009611	12607	F41D3.6	2.18189	-2.25784	2.45076	0.92128	0.356904	NA
WBGene00197025	9449	C14F5.7	1.18691	-2.25227	3.80546	0.591852	0.553949	NA
WBGene00013615	15662	fbxa-110	3.17303	-2.25146	2.29137	0.982586	0.325811	0.711584
WBGene00045163	28452	Y67A10A.14	3.03638	-2.24331	2.44648	0.916954	0.359167	0.740223
WBGene00017771	335	F25B4.8	272.314	-2.24288	0.334057	6.71409	1.89248e-11	1.52839e-09
WBGene00043984	4441	C56E6.7	2.84902	-2.23896	2.062	1.08582	0.277559	0.659118
WBGene00009684	7143	msd-3	67.5946	-2.23688	0.496123	4.50872	6.52185e-06	0.000198726
WBGene00014170	5258	ZK945.8	3.56377	-2.229	2.2493	0.990979	0.321696	0.70708
WBGene00013068	7729	Y51A2B.4	8.62428	-2.22842	1.315	1.69462	0.0901478	0.369266
WBGene00006237	13564	str-204	7.25315	-2.22766	1.68193	1.32446	0.18535	0.545063
WBGene00012268	5221	W04G5.8	17.4039	-2.22731	1.12329	1.98284	0.0473854	0.250182
WBGene00014069	9745	ZK678.3	20.3273	-2.22635	0.731147	3.04501	0.00232675	0.0295737
WBGene00006927	109	vit-3	294987	-2.22626	0.41927	5.30986	1.09712e-07	4.79056e-06
WBGene00005577	20486	sri-65	1.27712	-2.22499	4.46288	0.498555	0.618093	NA
WBGene00014755	16644	F40F12.8	12.5168	-2.22496	1.1039	2.01554	0.0438483	0.238759
WBGene00006040	8073	ssp-11	86.0311	-2.22319	0.358123	6.2079	5.36972e-10	3.57694e-08
WBGene00206395	17930	C08H9.18	1.61704	-2.22154	2.94542	0.754235	0.450708	NA
WBGene00011426	7698	T04C10.3	3.81659	-2.22085	1.74038	1.27607	0.20193	0.567805
WBGene00005519	15532	sri-7	2.19794	-2.21452	2.66277	0.831659	0.405602	NA
WBGene00003363	14020	mir-270	1.90363	-2.21235	2.62153	0.843915	0.398717	NA
WBGene00050896	11397	ttr-56	9.92825	-2.21	1.13634	1.94484	0.051794	0.264751
WBGene00020182	6853	ugt-53	343.018	-2.20916	0.230732	9.57454	1.02309e-21	2.33418e-19
WBGene00198454	11439	F28C1.13	1.02306	-2.20732	2.98112	0.740432	0.459038	NA
WBGene00011961	20527	T23G4.5	0.862215	-2.20479	3.80024	0.58017	0.5618	NA
WBGene00012871	7724	Y45F10B.3	25.9921	-2.20439	0.697255	3.16153	0.00156944	0.0214252
WBGene00044955	16175	K07C11.11	1.40912	-2.20155	2.89353	0.760853	0.446745	NA
WBGene00044664	19336	F59A6.11	0.866734	-2.1992	4.36357	0.503992	0.614267	NA
WBGene00007273	2622	C03C10.7	2.4802	-2.19623	1.98719	1.1052	0.269074	0.650053
WBGene00016347	23728	C33E10.5	2.12044	-2.19566	2.6797	0.819369	0.412576	NA
WBGene00009670	20035	F43G9.8	11.9852	-2.18788	0.882815	2.4783	0.0132008	0.105955
WBGene00007792	21542	C28D4.4	25.0542	-2.18679	0.714108	3.06227	0.00219663	0.0281748
WBGene00014770	23648	F54F3.2	23.3461	-2.18329	0.682946	3.19688	0.00138925	0.0194601
WBGene00007970	13081	C36A4.10	5.79861	-2.17734	1.22311	1.78016	0.075049	0.331028
WBGene00015421	5759	C04E6.4	9.73324	-2.17688	1.5497	1.40471	0.160108	0.509133
WBGene00021993	10857	Y59E9AL.3	171.182	-2.17539	0.291928	7.45181	9.20678e-14	9.60241e-12
WBGene00044898	18863	let-383	98.9607	-2.17471	0.387611	5.61056	2.01671e-08	1.0398e-06
WBGene00045096	1464	K01A6.7	8.15325	-2.1737	1.68423	1.29062	0.196835	0.560911
WBGene00009599	16579	F40G12.4	2.57022	-2.17341	2.57511	0.844006	0.398666	0.771042
WBGene00010114	3192	F55D12.6	55.2325	-2.17104	0.717037	3.0278	0.00246341	0.0308081
WBGene00016807	15236	C50D2.3	25.3015	-2.1708	0.713574	3.04215	0.00234893	0.0298348
WBGene00019368	366	K03H6.2	2277.98	-2.16971	0.170632	12.7157	4.83665e-37	2.59643e-34
WBGene00017382	9804	F11D5.5	26.9693	-2.16852	0.609112	3.56013	0.000370669	0.00661982
WBGene00012847	18132	srxa-15	6.45356	-2.16652	1.13471	1.90931	0.0562218	0.276919
WBGene00022845	15337	ZK1055.4	8.79524	-2.16036	1.29772	1.66474	0.0959652	0.384029
WBGene00005759	10552	srw-12	4.66317	-2.1592	1.30858	1.65003	0.0989374	0.390023
WBGene00016633	4315	C44B11.1	6.18784	-2.15643	1.46646	1.4705	0.141426	0.479981
WBGene00044208	19331	Y6G8.6	0.449712	-2.15368	5.99698	0.359127	0.7195	NA
WBGene00005671	21018	sru-8	0.845166	-2.15368	5.99698	0.359127	0.7195	NA
WBGene00010594	6194	swt-5	11.4046	-2.14537	1.07119	2.00279	0.0451997	0.242733
WBGene00018602	346	F48D6.4	6599.21	-2.1448	0.162625	13.1887	1.01993e-39	6.89475e-37
WBGene00018809	21728	F54D10.8	10.2895	-2.14338	1.09359	1.95995	0.0500018	0.259121
WBGene00219209	9972	F29F11.20	3.79829	-2.13631	1.99902	1.06868	0.285216	0.667188
WBGene00016251	14705	C30E1.2	7.40989	-2.12874	1.0541	2.01949	0.0434363	0.237294
WBGene00003437	7042	msp-42	5.6655	-2.12422	1.5298	1.38855	0.164969	0.51768
WBGene00022724	7905	ZK380.4	5.70259	-2.12175	1.74801	1.21381	0.224821	0.598954
WBGene00018727	19248	jbts-14	6.60203	-2.11719	1.37697	1.53757	0.124153	0.444974
WBGene00009467	21071	F36D1.8	2.95128	-2.11255	2.11975	0.996603	0.318957	0.704028
WBGene00044196	21789	F55C9.12	1.06062	-2.11052	3.81116	0.553774	0.579734	NA
WBGene00003457	3558	msp-64	476.791	-2.10902	0.349275	6.03829	1.55757e-09	9.572e-08
WBGene00170345	24740	21ur-14817	1.15974	-2.1058	3.35342	0.627954	0.530034	NA
WBGene00011675	15145	cyp-13A3	15.1216	-2.1049	0.951594	2.21197	0.0269684	0.174735
WBGene00235284	46774	T12G3.11	2.4037	-2.10369	1.7937	1.17282	0.240867	0.619683
WBGene00195209	22890	C07B5.8	1.44874	-2.10183	3.22204	0.652331	0.514188	NA
WBGene00206374	13451	K10G6.9	6.32537	-2.09494	1.03877	2.01675	0.0437219	0.238284
WBGene00019188	4356	H11E01.3	428.172	-2.09287	0.343233	6.0975	1.07738e-09	6.82792e-08
WBGene00010062	16585	lipl-1	1204.19	-2.08332	0.28892	7.21073	5.56527e-13	5.13017e-11
WBGene00017396	6337	F12A10.7	4.40764	-2.08262	1.61235	1.29166	0.196473	0.560668
WBGene00044243	7418	F16C3.4	20.9175	-2.08199	0.860219	2.4203	0.0155075	0.119934
WBGene00049835	21280	21ur-1928	0.785681	-2.08153	3.94541	0.527583	0.597789	NA
WBGene00200150	22921	C07A9.16	1.87258	-2.08138	2.38515	0.872643	0.382858	NA
WBGene00173920	21856	21ur-8696	2.64475	-2.0806	1.57261	1.32302	0.185828	0.545765
WBGene00013049	4743	Y50E8A.6	4.6129	-2.07901	1.57698	1.31835	0.187386	0.548103
WBGene00013466	19660	srz-47	1.62536	-2.07759	3.22134	0.644947	0.518962	NA
WBGene00022807	16154	srab-25	1.66155	-2.07719	3.02687	0.68625	0.492556	NA
WBGene00010786	9680	K12D12.4	35.9538	-2.07599	0.693587	2.99312	0.00276142	0.0334894
WBGene00014881	27658	Y39B6A.t7	0.44195	-2.07596	6.09705	0.340485	0.733491	NA
WBGene00172696	24869	21ur-6398	0.355809	-2.07596	6.09705	0.340485	0.733491	NA
WBGene00050269	14855	21ur-2318	0.362499	-2.07595	6.09705	0.340484	0.733492	NA
WBGene00199487	25835	K08E4.11	0.390485	-2.07595	6.09705	0.340484	0.733492	NA
WBGene00199652	14429	C41G11.15	0.397814	-2.07595	6.09705	0.340484	0.733492	NA
WBGene00219768	20440	linc-160	0.270237	-2.07595	6.09705	0.340484	0.733492	NA
WBGene00045347	28494	C14A6.9	0.292774	-2.07594	6.09705	0.340483	0.733493	NA
WBGene00045766	20171	21ur-279	0.382727	-2.07594	6.09705	0.340482	0.733493	NA
WBGene00219483	16445	Y116F11B.24	0.55884	-2.07593	6.09705	0.340481	0.733494	NA
WBGene00171712	16812	21ur-13554	0.457467	-2.07593	6.09705	0.340481	0.733494	NA
WBGene00023388	19805	Y67D2.t4	0.404437	-2.07593	6.09705	0.340481	0.733494	NA
WBGene00050812	24423	21ur-4492	0.294945	-2.07593	6.09705	0.340481	0.733494	NA
WBGene00197973	22412	C05G5.10	0.241964	-2.07593	6.09705	0.340481	0.733494	NA
WBGene00048712	24321	21ur-4584	0.302857	-2.07593	6.09705	0.340481	0.733494	NA
WBGene00173509	40948	21ur-15476	0.23832	-2.07593	6.09705	0.340481	0.733494	NA
WBGene00169862	14380	21ur-10289	0.41125	-2.07593	6.09705	0.340481	0.733495	NA
WBGene00049674	24367	21ur-5408	0.343851	-2.07592	6.09705	0.340479	0.733496	NA
WBGene00170574	38383	21ur-8789	0.24346	-2.07592	6.09705	0.340479	0.733496	NA
WBGene00023000	7907	F22B7.t3	0.193697	-2.0759	6.09706	0.340476	0.733498	NA
WBGene00022906	23972	C03F11.t1	0.364235	-2.0759	6.09706	0.340476	0.733498	NA
WBGene00196595	3971	R03A10.9	0.313715	-2.0759	6.09706	0.340476	0.733498	NA
WBGene00197637	43657	R13F6.13	0.260059	-2.0759	6.09706	0.340476	0.733498	NA
WBGene00200713	26058	T07F10.11	0.243218	-2.0759	6.09706	0.340476	0.733498	NA
WBGene00138714	33452	T02D1.9	0.232899	-2.0759	6.09706	0.340476	0.733498	NA
WBGene00018553	17732	srt-60	0.203785	-2.0759	6.09706	0.340476	0.733498	NA
WBGene00201410	45784	ZC190.15	0.206404	-2.0759	6.09706	0.340476	0.733498	NA
WBGene00006277	27018	str-250	0.224705	-2.0759	6.09706	0.340476	0.733498	NA
WBGene00196603	43084	C13G3.5	0.224705	-2.0759	6.09706	0.340476	0.733498	NA
WBGene00023327	28222	R03H4.8	0.217285	-2.0759	6.09706	0.340476	0.733498	NA
WBGene00172630	40177	21ur-10332	0.217285	-2.0759	6.09706	0.340476	0.733498	NA
WBGene00195278	42350	F46G11.7	0.217285	-2.0759	6.09706	0.340476	0.733498	NA
WBGene00200870	26097	F42G4.10	0.198134	-2.0759	6.09706	0.340476	0.733498	NA
WBGene00219737	26446	linc-155	0.163864	-2.0759	6.09706	0.340476	0.733498	NA
WBGene00047272	30088	21ur-1217	0.152748	-2.0759	6.09706	0.340476	0.733498	NA
WBGene00166323	34611	21ur-6917	0.152748	-2.0759	6.09706	0.340476	0.733498	NA
WBGene00194805	42288	mir-2210	0.152748	-2.0759	6.09706	0.340476	0.733498	NA
WBGene00171823	24811	21ur-9380	0.161899	-2.0759	6.09706	0.340476	0.733498	NA
WBGene00050976	24435	F28B1.11	0.147939	-2.0759	6.09706	0.340476	0.733498	NA
WBGene00169859	22872	21ur-8879	0.147939	-2.0759	6.09706	0.340476	0.733498	NA
WBGene00166253	16220	21ur-14426	0.14468	-2.0759	6.09706	0.340476	0.733498	NA
WBGene00050613	24414	21ur-1487	0.168127	-2.0759	6.09706	0.340476	0.733498	NA
WBGene00014650	23630	B0399.t7	0.0990926	-2.0759	6.09706	0.340476	0.733498	NA
WBGene00018459	23813	F45D11.14	0.0990926	-2.0759	6.09706	0.340476	0.733498	NA
WBGene00018919	23827	F56A4.11	0.0990926	-2.0759	6.09706	0.340476	0.733498	NA
WBGene00021225	27908	Y19D10A.10	0.0990926	-2.0759	6.09706	0.340476	0.733498	NA
WBGene00046441	24192	21ur-2888	0.0990926	-2.0759	6.09706	0.340476	0.733498	NA
WBGene00047234	30058	21ur-4874	0.0990926	-2.0759	6.09706	0.340476	0.733498	NA
WBGene00047341	30156	21ur-5283	0.0990926	-2.0759	6.09706	0.340476	0.733498	NA
WBGene00048727	31381	21ur-2971	0.0990926	-2.0759	6.09706	0.340476	0.733498	NA
WBGene00048990	31621	21ur-509	0.0990926	-2.0759	6.09706	0.340476	0.733498	NA
WBGene00050972	33348	T23D5.13	0.0990926	-2.0759	6.09706	0.340476	0.733498	NA
WBGene00077471	33366	rrn-4.8	0.0990926	-2.0759	6.09706	0.340476	0.733498	NA
WBGene00077474	33369	rrn-4.11	0.0990926	-2.0759	6.09706	0.340476	0.733498	NA
WBGene00167199	35389	21ur-7286	0.0990926	-2.0759	6.09706	0.340476	0.733498	NA
WBGene00167347	24599	21ur-9999	0.0990926	-2.0759	6.09706	0.340476	0.733498	NA
WBGene00167417	24602	21ur-7353	0.0990926	-2.0759	6.09706	0.340476	0.733498	NA
WBGene00167744	35889	21ur-6759	0.0990926	-2.0759	6.09706	0.340476	0.733498	NA
WBGene00168758	36802	21ur-11446	0.0990926	-2.0759	6.09706	0.340476	0.733498	NA
WBGene00169035	37042	21ur-7635	0.0990926	-2.0759	6.09706	0.340476	0.733498	NA
WBGene00169314	37283	21ur-14555	0.0990926	-2.0759	6.09706	0.340476	0.733498	NA
WBGene00171301	24781	21ur-11382	0.0990926	-2.0759	6.09706	0.340476	0.733498	NA
WBGene00171441	39143	21ur-12029	0.0990926	-2.0759	6.09706	0.340476	0.733498	NA
WBGene00171697	39372	21ur-13254	0.0990926	-2.0759	6.09706	0.340476	0.733498	NA
WBGene00171748	39419	21ur-11519	0.0990926	-2.0759	6.09706	0.340476	0.733498	NA
WBGene00172217	39821	21ur-12913	0.0990926	-2.0759	6.09706	0.340476	0.733498	NA
WBGene00174022	41395	21ur-6967	0.0990926	-2.0759	6.09706	0.340476	0.733498	NA
WBGene00195324	42376	F56E3.5	0.0990926	-2.0759	6.09706	0.340476	0.733498	NA
WBGene00195953	16841	C42D8.10	0.0990926	-2.0759	6.09706	0.340476	0.733498	NA
WBGene00195975	20755	K09A9.9	0.0990926	-2.0759	6.09706	0.340476	0.733498	NA
WBGene00196895	25352	T06H11.8	0.0990926	-2.0759	6.09706	0.340476	0.733498	NA
WBGene00198580	22415	Y64G10A.355	0.0990926	-2.0759	6.09706	0.340476	0.733498	NA
WBGene00198878	44348	T28B11.15	0.0990926	-2.0759	6.09706	0.340476	0.733498	NA
WBGene00198888	44357	C54H2.10	0.0990926	-2.0759	6.09706	0.340476	0.733498	NA
WBGene00199097	25752	B0403.11	0.0990926	-2.0759	6.09706	0.340476	0.733498	NA
WBGene00199573	21397	C06A6.12	0.0990926	-2.0759	6.09706	0.340476	0.733498	NA
WBGene00200323	18417	K02E10.10	0.0990926	-2.0759	6.09706	0.340476	0.733498	NA
WBGene00200390	45209	R08B4.12	0.0990926	-2.0759	6.09706	0.340476	0.733498	NA
WBGene00200776	45435	F40G9.22	0.0990926	-2.0759	6.09706	0.340476	0.733498	NA
WBGene00201386	12942	Y4C6B.100	0.0990926	-2.0759	6.09706	0.340476	0.733498	NA
WBGene00235341	11975	Y69A2AR.49	0.0990926	-2.0759	6.09706	0.340476	0.733498	NA
WBGene00044560	12875	C36C9.6	0.492116	-2.0759	6.09706	0.340476	0.733498	NA
WBGene00020539	7355	T16D1.1	0.486786	-2.0759	6.09706	0.340476	0.733498	NA
WBGene00171177	12403	21ur-13616	0.696875	-2.0759	6.09706	0.340476	0.733498	NA
WBGene00022578	23958	ZC262.1	0.438449	-2.0759	6.09706	0.340476	0.733498	NA
WBGene00195891	42677	C09H10.11	0.379118	-2.0759	6.09706	0.340476	0.733498	NA
WBGene00195832	42644	T28B11.5	0.540316	-2.0759	6.09706	0.340476	0.733498	NA
WBGene00206393	21940	W04G5.16	0.324596	-2.0759	6.09706	0.340476	0.733498	NA
WBGene00198480	44130	F54D5.21	0.362775	-2.0759	6.09706	0.340476	0.733498	NA
WBGene00005502	23112	srh-298	0.291218	-2.0759	6.09706	0.340476	0.733498	NA
WBGene00005786	23171	srw-39	0.399651	-2.0759	6.09706	0.340476	0.733498	NA
WBGene00045089	20170	C05H8.3	0.25744	-2.0759	6.09706	0.340476	0.733498	NA
WBGene00023348	28235	T24E12.7	0.453669	-2.0759	6.09706	0.340476	0.733498	NA
WBGene00196058	25194	Y55F3BR.13	0.266131	-2.0759	6.09706	0.340476	0.733498	NA
WBGene00219332	26416	Y116A8C.467	0.304096	-2.0759	6.09706	0.340476	0.733498	NA
WBGene00197553	12426	F45E1.10	0.193526	-2.0759	6.09706	0.340476	0.733498	NA
WBGene00077575	33399	F14D7.16	0.216973	-2.0759	6.09706	0.340476	0.733498	NA
WBGene00044781	24090	Y53H1A.6	0.201594	-2.0759	6.09706	0.340476	0.733498	NA
WBGene00048264	24297	21ur-3561	0.201594	-2.0759	6.09706	0.340476	0.733498	NA
WBGene00165479	20681	21ur-5998	2.07724	-2.07397	2.24956	0.921941	0.356559	NA
WBGene00048534	31217	21ur-5340	0.541892	-2.07349	5.92941	0.349696	0.726567	NA
WBGene00003424	3557	msp-3	300.347	-2.07027	0.231988	8.92403	4.49637e-19	7.96774e-17
WBGene00005651	7070	srp-10	3.64325	-2.06801	1.89753	1.08985	0.275781	0.657637
WBGene00196579	21346	C06G1.8	0.586497	-2.0674	5.56134	0.371745	0.710082	NA
WBGene00044384	14828	F11G11.14	8.59455	-2.06501	1.26229	1.63592	0.101857	0.397518
WBGene00235324	22447	F10G2.10	0.692982	-2.0639	5.37529	0.383961	0.701008	NA
WBGene00045124	22854	C07A9.14	0.409181	-2.06366	5.36335	0.384772	0.700407	NA
WBGene00015893	21675	C17C3.11	5.08166	-2.06331	1.73504	1.1892	0.23436	0.611178
WBGene00009633	9656	F42E11.3	7.61944	-2.06158	1.31404	1.56889	0.116674	0.432696
WBGene00010381	17109	H12D21.5	26.2521	-2.06003	0.686439	3.00104	0.00269059	0.0328054
WBGene00168772	36816	21ur-15486	0.478946	-2.0577	5.0826	0.404853	0.685586	NA
WBGene00016322	13222	C32E8.4	52.7479	-2.05726	0.656648	3.13298	0.00173043	0.0230875
WBGene00201383	2983	F25D7.10	0.599212	-2.05404	4.92956	0.416678	0.676914	NA
WBGene00021436	5898	Y39A3B.1	7.66178	-2.05309	0.969252	2.11822	0.0341564	0.203289
WBGene00195455	17364	C48E7.12	0.722203	-2.05169	4.83674	0.424188	0.671428	NA
WBGene00018834	17228	F54F2.6	0.587017	-2.05112	4.81476	0.426006	0.670103	NA
WBGene00013886	20545	ZC412.5	18.0577	-2.04918	0.733202	2.79483	0.00519266	0.0545005
WBGene00010126	14116	F55G11.6	3.3728	-2.04831	1.53094	1.33794	0.180916	0.538464
WBGene00010238	18100	F58B4.5	1177.27	-2.0476	0.210293	9.7369	2.09848e-22	5.17588e-20
WBGene00196814	43198	F14F3.8	1.04855	-2.04704	4.66638	0.438679	0.660894	NA
WBGene00017679	11254	F21F8.5	6.42227	-2.04556	1.62278	1.26053	0.207479	0.575605
WBGene00003474	48	mtl-2	3364.37	-2.04473	0.160978	12.7019	5.76926e-37	3.00859e-34
WBGene00001901	20466	his-27	4.46028	-2.04228	1.10384	1.85016	0.0642898	0.301185
WBGene00001923	26466	his-49	4.46028	-2.04228	1.10384	1.85016	0.0642898	0.301185
WBGene00023330	17815	R13D7.5	0.917796	-2.0404	4.44845	0.458677	0.646466	NA
WBGene00008465	5131	E03A3.5	11.7531	-2.03789	0.885121	2.30239	0.0213131	0.148869
WBGene00020978	11334	W03B1.9	9.72705	-2.03545	1.03764	1.96161	0.0498074	0.258777
WBGene00013935	14677	ZK218.1	2.98417	-2.03262	2.18465	0.930409	0.352159	0.734407
WBGene00005324	15036	T27A1.1	6.67771	-2.02816	1.3396	1.514	0.130025	0.457357
WBGene00048062	30802	21ur-2670	0.681076	-2.02736	4.08555	0.496227	0.619735	NA
WBGene00003456	8544	msp-63	45.3904	-2.02656	0.578323	3.5042	0.000457988	0.0078779
WBGene00199658	25870	C09D8.11	1.01681	-2.02512	4.02994	0.502517	0.615304	NA
WBGene00220133	18948	Y14H12A.4	1.06379	-2.01676	3.83872	0.525372	0.599324	NA
WBGene00016382	14711	C33H5.16	25.6473	-2.01485	0.638834	3.15394	0.00161082	0.0217944
WBGene00201046	15938	Y67D2.8	1.08526	-2.01308	3.76158	0.53517	0.592532	NA
WBGene00015165	20079	B0361.11	30.7756	-2.01068	0.827816	2.42889	0.015145	0.118023
WBGene00195048	23443	K08D10.13	2.62746	-2.00871	2.04403	0.98272	0.325745	0.711541
WBGene00015661	8274	C09H5.7	27.7997	-2.00864	0.788808	2.54642	0.0108834	0.0923062
WBGene00013070	15175	Y51A2B.6	21.5993	-2.00447	0.78404	2.5566	0.0105702	0.0909286
WBGene00006550	23279	tbx-31	5.8887	-2.00427	1.23143	1.6276	0.10361	0.401507
WBGene00045402	15860	Y75B12B.13	1.31062	-2.00413	3.58682	0.55875	0.576333	NA
WBGene00197915	19895	C17H12.30	2.31368	-2.00386	2.12246	0.944119	0.345109	NA
WBGene00018745	7842	F53C3.1	28.7148	-2.0012	0.663159	3.01768	0.00254714	0.0316046
WBGene00020016	2394	lipl-3	7.68363	-1.99445	1.10074	1.81192	0.0699987	0.317239
WBGene00009375	12602	F34D10.6	305.062	-1.99065	0.308347	6.45589	1.07587e-10	7.82344e-09
WBGene00013815	7236	Y116A8C.44	1.30948	-1.98966	3.33968	0.595763	0.551334	NA
WBGene00009005	22592	F21C3.6	25.0355	-1.98947	0.662966	3.00086	0.0026922	0.0328054
WBGene00016942	5800	C55B7.3	110.367	-1.98579	0.34532	5.75058	8.89387e-09	4.90425e-07
WBGene00010728	22092	K09G1.2	30.2059	-1.98391	0.895369	2.21575	0.0267088	0.173546
WBGene00196163	22897	F23H12.13	1.46353	-1.97967	3.1892	0.620742	0.534769	NA
WBGene00021491	9880	comt-4	122.227	-1.97679	0.532443	3.71267	0.000205082	0.00400967
WBGene00007515	645	C10C6.7	268.081	-1.97678	0.219612	9.00125	2.23165e-19	4.03288e-17
WBGene00008162	19580	C47F8.6	2.76703	-1.97643	2.36431	0.835944	0.403186	0.774627
WBGene00044084	18851	sre-46	3.24112	-1.9746	2.09578	0.942176	0.346103	0.7295
WBGene00268216	10976	F49B2.9	6.26698	-1.97455	1.6574	1.19135	0.233516	0.61037
WBGene00197234	10435	F55A12.13	3.33432	-1.97429	1.90332	1.03729	0.299602	0.682618
WBGene00022008	19786	Y59H11AM.4	15.6908	-1.96549	0.954078	2.06009	0.03939	0.22224
WBGene00014049	23582	ZK666.11	11.6864	-1.96509	1.37164	1.43266	0.151954	0.496757
WBGene00077660	24457	Y17D7B.9	1.43049	-1.96444	2.98463	0.658187	0.510418	NA
WBGene00200503	4975	F29G9.14	11.2673	-1.96255	1.40254	1.39929	0.161727	0.511763
WBGene00006227	9588	str-183	7.9562	-1.96221	1.30853	1.49955	0.13373	0.464243
WBGene00011537	17131	T06E4.10	10.6361	-1.96194	1.15023	1.70569	0.0880663	0.365214
WBGene00200308	7467	C56C10.15	1.01776	-1.96015	2.93153	0.668645	0.503722	NA
WBGene00015685	10253	C10G11.1	7.67177	-1.95966	1.22083	1.60518	0.108454	0.413687
WBGene00201755	8956	C37A2.9	2.38988	-1.95896	2.91705	0.671556	0.501867	0.834706
WBGene00010447	17112	K01A6.5	9.29759	-1.95693	1.16431	1.68076	0.092809	0.376099
WBGene00015192	5272	B0432.11	6.47746	-1.95689	1.33709	1.46355	0.143318	0.483788
WBGene00016274	4309	C30G12.2	1616.53	-1.9561	0.211131	9.26487	1.95324e-20	3.96117e-18
WBGene00220250	3985	C09B9.85	6.36998	-1.95538	1.50672	1.29777	0.194365	0.557637
WBGene00012594	9217	nspe-5	47.3295	-1.9551	0.847846	2.30596	0.0211129	0.148099
WBGene00018179	21715	F38E1.6	1.67616	-1.95391	2.85733	0.683825	0.494086	NA
WBGene00017810	19230	clec-157	2.12423	-1.95368	2.85457	0.684402	0.493721	NA
WBGene00012818	6236	Y43F8B.7	2.89289	-1.94957	1.85093	1.05329	0.292208	0.674022
WBGene00002095	2543	ins-12	30.5985	-1.94719	0.610571	3.18913	0.00142701	0.0198672
WBGene00021164	7885	Y5H2B.1	13.8036	-1.94445	1.04764	1.85603	0.0634497	0.299015
WBGene00166274	20686	21ur-11916	1.6672	-1.9439	2.74505	0.708146	0.478855	NA
WBGene00005146	13543	srd-69	2.43031	-1.94146	1.82301	1.06498	0.286887	0.66789
WBGene00012180	15157	W01D2.3	34.4432	-1.93952	0.774153	2.50534	0.0122333	0.100352
WBGene00197041	11432	F56B3.13	3.48075	-1.93904	2.09921	0.923701	0.355642	0.737391
WBGene00019982	12801	srbc-58	2.79797	-1.93601	2.66186	0.727315	0.467033	0.812664
WBGene00016956	15239	C55C3.6	15.2955	-1.93503	1.30762	1.47981	0.138925	0.474932
WBGene00007370	19560	str-264	5.57335	-1.93414	1.2167	1.58966	0.11191	0.421448
WBGene00044906	22850	Y67A10A.11	2.05915	-1.9331	2.16006	0.89493	0.370824	NA
WBGene00022778	13847	ZK616.8	17.6941	-1.93262	0.970988	1.99037	0.0465504	0.247203
WBGene00019016	5360	F57F4.2	2.98478	-1.93157	2.24472	0.860497	0.389515	0.763562
WBGene00018178	22744	F38E1.3	30.6879	-1.92541	0.639131	3.01254	0.00259067	0.0319277
WBGene00201301	17419	C10F3.15	5.33899	-1.92439	2.54662	0.755664	0.449851	0.801354
WBGene00007806	19574	clec-230	10.9009	-1.92434	1.26306	1.52355	0.127621	0.452825
WBGene00021222	23911	irld-53	1.22504	-1.9227	2.99372	0.642245	0.520714	NA
WBGene00021010	18801	W03G1.2	30.2662	-1.92008	0.611628	3.13929	0.00169358	0.0227455
WBGene00005118	15031	srd-40	1.04625	-1.91853	3.95528	0.485055	0.627638	NA
WBGene00021650	15818	Y47G6A.26	43.6669	-1.91805	0.61742	3.10655	0.00189284	0.024852
WBGene00018373	4349	F43B10.1	4.46384	-1.91777	1.32697	1.44522	0.148396	0.491654
WBGene00012838	22649	Y43F8C.17	3.85338	-1.91597	1.60695	1.1923	0.233143	0.609996
WBGene00005255	23049	srh-32	0.603978	-1.91504	5.88953	0.32516	0.74506	NA
WBGene00008592	22583	F08H9.4	12.6953	-1.91258	1.14624	1.66858	0.0952014	0.381599
WBGene00021360	11340	Y37E11AL.4	3.70868	-1.90992	2.41346	0.791361	0.428733	0.789392
WBGene00044616	10393	M01A12.4	31.4643	-1.90871	0.559986	3.40849	0.000653246	0.0105341
WBGene00014241	15196	ZK1251.3	9.60976	-1.90742	1.35746	1.40514	0.159978	0.508964
WBGene00016600	6317	ets-5	17.6737	-1.9061	0.906059	2.10372	0.0354025	0.207627
WBGene00008069	16556	C43D7.7	5.69129	-1.90452	1.19766	1.5902	0.111789	0.42139
WBGene00007832	14574	srbc-82	6.95491	-1.90427	2.36416	0.805475	0.420546	0.786111
WBGene00003434	10523	msp-38	267.997	-1.90027	0.322296	5.89603	3.72343e-09	2.17821e-07
WBGene00021109	8871	W09C3.1	11.0489	-1.89728	0.883575	2.14728	0.0317714	0.193871
WBGene00006925	634	vit-1	272407	-1.89511	0.449394	4.21704	2.47528e-05	0.000643572
WBGene00044719	14360	clec-172	36.468	-1.89415	0.531751	3.56209	0.000367909	0.00657695
WBGene00044151	17829	W04G3.12	2.74481	-1.89333	2.29067	0.826539	0.408499	0.778626
WBGene00019425	4874	K06A1.2	24.2957	-1.89221	0.965706	1.9594	0.0500654	0.259232
WBGene00004989	90	spp-4	802.737	-1.89154	0.292519	6.46639	1.00375e-10	7.35762e-09
WBGene00016271	17194	irld-23	9.99187	-1.89035	1.23184	1.53458	0.124888	0.446865
WBGene00009902	6176	drd-1	607.717	-1.88787	0.222037	8.50248	1.85582e-17	2.84643e-15
WBGene00008308	12088	C54E10.3	2.93576	-1.88546	2.8654	0.658009	0.510532	0.839149
WBGene00219709	4982	linc-37	43.4891	-1.88511	1.05447	1.78773	0.0738197	0.328003
WBGene00077558	10408	T06D10.3	23.4743	-1.88477	0.574072	3.28316	0.00102651	0.0152201
WBGene00006659	11578	twk-4	4.08172	-1.88344	1.4745	1.27734	0.201482	0.56709
WBGene00077685	12893	C04F12.12	21.9284	-1.88185	0.80447	2.33924	0.0193231	0.138743
WBGene00013505	1760	Y71A12B.8	5.5476	-1.8802	1.49255	1.25972	0.20777	0.575733
WBGene00012336	17629	W07G4.2	10.4109	-1.87775	0.912444	2.05793	0.0395967	0.223062
WBGene00018111	7320	F36H9.2	13.7824	-1.8743	0.995868	1.88208	0.0598251	0.288183
WBGene00009893	9661	F49E11.7	25.4004	-1.87195	0.882811	2.12045	0.0339685	0.202753
WBGene00006039	7074	ssp-10	257.968	-1.86955	0.226673	8.24778	1.61361e-16	2.19788e-14
WBGene00044018	15346	T04B2.8	5.86511	-1.86889	1.59693	1.17031	0.241878	0.620914
WBGene00043743	14347	Y59E9AL.2	112.732	-1.86825	0.348935	5.35415	8.59605e-08	3.8544e-06
WBGene00015855	18709	C16C8.18	59.0511	-1.868	0.480752	3.88559	0.000102082	0.00222605
WBGene00194788	8937	R02D5.10	6.96973	-1.86754	1.41171	1.3229	0.185869	0.545765
WBGene00012318	21625	srxa-1	4.16294	-1.86713	1.73398	1.07679	0.281573	0.66279
WBGene00012892	4247	Y45F10D.14	10.9534	-1.8636	1.07463	1.73418	0.0828867	0.352603
WBGene00194731	13401	Y39A1A.27	10.4465	-1.86291	1.50162	1.24061	0.214751	0.585545
WBGene00005696	23150	sru-33	1.56806	-1.86102	2.9201	0.637316	0.523919	NA
WBGene00021623	6887	Y47D7A.11	4.15956	-1.85869	1.84032	1.00998	0.312504	0.69674
WBGene00020416	19765	T10E9.6	13.7331	-1.8583	1.11835	1.66165	0.0965829	0.385595
WBGene00004903	12539	snf-4	9.52912	-1.85349	1.2314	1.50518	0.132278	0.461211
WBGene00013614	2779	clec-237	2.32485	-1.85123	2.36546	0.782608	0.433858	NA
WBGene00044313	8907	M02D8.7	7.77971	-1.84934	1.56847	1.17907	0.238369	0.617034
WBGene00010603	14126	nhr-198	3.84025	-1.84373	1.33871	1.37725	0.168436	0.52229
WBGene00022634	14341	ZC581.7	57.7636	-1.84279	0.589997	3.12339	0.00178778	0.0237313
WBGene00194652	8936	F15H9.8	15.2792	-1.84278	0.746068	2.46999	0.0135118	0.107976
WBGene00172271	12405	21ur-7600	2.42185	-1.84047	2.33077	0.789641	0.429737	0.789806
WBGene00022700	6906	ZK353.4	25.3223	-1.8401	0.660952	2.78402	0.00536896	0.0556786
WBGene00000679	18479	col-105	3.51272	-1.83908	1.92424	0.955744	0.339201	0.723006
WBGene00005543	23120	sri-31	4.68458	-1.83872	1.93018	0.952614	0.340786	0.725029
WBGene00016058	17685	nspd-3	113.232	-1.83844	0.60628	3.03232	0.0024268	0.0305287
WBGene00197405	10937	K02F6.10	1.67207	-1.83682	2.56361	0.716499	0.473683	NA
WBGene00010657	13129	K08D8.3	708.583	-1.83448	0.256608	7.14896	8.74385e-13	7.70979e-11
WBGene00018133	2356	F37A4.3	12.3689	-1.83325	1.01718	1.80229	0.0714993	0.321271
WBGene00009853	16583	arrd-27	5.3803	-1.83053	2.42697	0.754246	0.450701	0.80193
WBGene00044655	10882	fbxa-194	3.93612	-1.82983	2.44435	0.748595	0.454101	0.804373
WBGene00005297	23056	srh-76	4.61667	-1.82941	2.10948	0.867233	0.385814	0.761048
WBGene00044944	28373	R151.13	1.39906	-1.82929	2.69589	0.678548	0.497425	NA
WBGene00018690	12778	fbxa-46	13.1645	-1.82628	1.09025	1.6751	0.0939137	0.378977
WBGene00194643	8935	C48D1.9	16.3184	-1.82607	0.76925	2.37383	0.0176047	0.130512
WBGene00005132	13041	srd-54	6.29908	-1.82579	1.79492	1.0172	0.309058	0.693245
WBGene00017524	23779	F16G10.9	2.92104	-1.82548	2.56432	0.711878	0.47654	0.818648
WBGene00219455	18442	Y43F8B.29	1.58907	-1.82534	2.56856	0.710649	0.477302	NA
WBGene00010804	12627	M01E5.1	3.69035	-1.82479	2.22574	0.819858	0.412297	0.780951
WBGene00017057	12243	D2062.5	2.88663	-1.82327	2.63488	0.691974	0.488954	0.826638
WBGene00044965	19340	smy-6	2.13674	-1.82247	2.66228	0.684552	0.493627	NA
WBGene00077788	17863	W07G4.8	1.75817	-1.82155	2.69498	0.675906	0.4991	NA
WBGene00009550	7656	F38H4.6	16.9962	-1.82146	0.808952	2.25163	0.0243455	0.162886
WBGene00048222	18872	21ur-1667	1.25686	-1.82144	2.69896	0.674869	0.499759	NA
WBGene00018552	21724	srt-19	2.09024	-1.8193	2.40079	0.757791	0.448576	NA
WBGene00019856	23861	R03H10.4	2.87835	-1.81734	2.8673	0.633815	0.526202	0.847505
WBGene00019350	15265	K02H11.9	2.26547	-1.81416	2.61856	0.692807	0.488431	NA
WBGene00007308	6594	C04G2.9	1237.48	-1.81373	0.188967	9.59813	8.14068e-22	1.88081e-19
WBGene00196251	20312	C27A7.10	1.32201	-1.81237	3.13473	0.578158	0.563157	NA
WBGene00014421	27420	K03B8.10	1.75934	-1.81227	3.14077	0.577015	0.563929	NA
WBGene00010352	12128	fbxb-76	1.39668	-1.81211	3.15088	0.575113	0.565215	NA
WBGene00255703	14462	C06A12.20	2.11627	-1.81164	2.75499	0.657586	0.510804	NA
WBGene00012414	16068	Y7A5A.8	1.75024	-1.8106	3.25363	0.556485	0.577879	NA
WBGene00020063	19758	R13D11.10	1.11801	-1.81031	3.2746	0.552835	0.580377	NA
WBGene00219583	8472	anr-43	1.85642	-1.80988	3.30708	0.547273	0.584191	NA
WBGene00020431	22779	irld-50	1.58651	-1.80899	3.37707	0.535667	0.592188	NA
WBGene00169034	21302	21ur-9743	1.08834	-1.80851	3.41735	0.529213	0.596657	NA
WBGene00015252	11729	B0546.5	1.59713	-1.80769	3.48873	0.518153	0.604351	NA
WBGene00014047	8734	clec-61	1.77	-1.80717	3.07457	0.587781	0.556679	NA
WBGene00049662	14853	21ur-795	0.762576	-1.80675	3.57942	0.504759	0.613728	NA
WBGene00045094	28419	D1007.20	0.899643	-1.80662	3.59255	0.502879	0.615049	NA
WBGene00170795	16811	21ur-6717	0.700987	-1.80657	3.59734	0.502194	0.615531	NA
WBGene00013621	18679	clec-239	0.950799	-1.80602	3.65455	0.494183	0.621177	NA
WBGene00004170	26562	pqn-90	0.754088	-1.80583	3.67454	0.491444	0.623112	NA
WBGene00050672	8919	21ur-2095	1.08347	-1.80565	3.69373	0.488843	0.624953	NA
WBGene00003309	21483	mir-81	0.624599	-1.80552	3.70865	0.486841	0.626371	NA
WBGene00219490	46464	Y116A8B.98	1.15006	-1.80497	3.2885	0.548873	0.583093	NA
WBGene00077577	20208	R02D5.9	0.615572	-1.80453	3.8268	0.471549	0.637249	NA
WBGene00198142	25574	F26F12.13	0.979211	-1.80429	3.85678	0.467821	0.639912	NA
WBGene00005603	23135	srj-15	1.20337	-1.8042	3.86837	0.466397	0.640931	NA
WBGene00172557	24860	21ur-11088	1.35497	-1.80366	3.94014	0.457765	0.647121	NA
WBGene00199315	44593	T04C12.23	0.773934	-1.80336	3.98202	0.452875	0.650639	NA
WBGene00169578	13388	21ur-7740	1.203	-1.80335	3.98272	0.452794	0.650697	NA
WBGene00201941	26278	C37E2.9	1.32578	-1.80326	3.99542	0.451332	0.65175	NA
WBGene00044958	21803	ZK994.7	0.693146	-1.80302	4.03135	0.447249	0.654695	NA
WBGene00199946	20844	F52B5.10	0.639141	-1.80234	4.1366	0.435706	0.66305	NA
WBGene00014500	16641	T04D3.t1	1.34389	-1.80201	4.19083	0.42999	0.667203	NA
WBGene00201456	21422	Y65B4BR.10	1.14977	-1.80185	4.21726	0.427256	0.669193	NA
WBGene00235301	3488	B0513.90	0.956461	-1.80157	4.26588	0.422321	0.672791	NA
WBGene00206511	26397	W02H5.16	1.08369	-1.80115	4.3432	0.414705	0.678358	NA
WBGene00219229	11458	mir-4934	0.995415	-1.80106	4.36092	0.413001	0.679606	NA
WBGene00049443	32024	21ur-1529	0.545814	-1.80096	4.3809	0.411094	0.681004	NA
WBGene00195623	11927	Y54G2A.58	1.19341	-1.80042	3.60023	0.500086	0.617014	NA
WBGene00201279	14941	C44C10.14	0.97245	-1.8003	4.5134	0.39888	0.689982	NA
WBGene00173356	22875	21ur-7261	0.778727	-1.80021	4.53462	0.396992	0.691374	NA
WBGene00199971	44980	T08G11.10	0.843352	-1.80016	4.54586	0.396	0.692105	NA
WBGene00008367	23319	D1053.2	0.758332	-1.80008	4.56295	0.3945	0.693212	NA
WBGene00010388	22610	srz-42	0.850781	-1.80006	4.56914	0.39396	0.693611	NA
WBGene00268215	12962	C49F5.13	0.770574	-1.80002	4.57779	0.393206	0.694167	NA
WBGene00048170	24292	21ur-1207	0.703884	-1.79972	4.64237	0.387673	0.698258	NA
WBGene00268194	26928	F36H9.10	0.755837	-1.79957	4.68205	0.384355	0.700715	NA
WBGene00170953	21849	21ur-15479	0.683732	-1.79928	4.75168	0.378661	0.704939	NA
WBGene00219579	46472	linc-43	0.65116	-1.79926	4.75707	0.378228	0.705261	NA
WBGene00200249	11444	F12F3.8	0.628598	-1.79899	4.8266	0.372723	0.709355	NA
WBGene00048464	31148	21ur-3865	0.603757	-1.79887	4.8592	0.370198	0.711235	NA
WBGene00015306	5757	C01G5.4	55.3668	-1.79875	0.530811	3.38868	0.000702307	0.011205
WBGene00172230	24837	21ur-14349	0.560255	-1.79855	4.95003	0.363341	0.71635	NA
WBGene00219937	26853	F37F2.4	0.81712	-1.79835	5.00861	0.359052	0.719556	NA
WBGene00195485	12414	F55A12.11	0.528605	-1.79831	5.01919	0.358287	0.720129	NA
WBGene00197432	9958	T21G5.7	0.541972	-1.79828	5.02673	0.357744	0.720535	NA
WBGene00021706	14800	srbc-39	0.982373	-1.79814	5.06951	0.354697	0.722816	NA
WBGene00196969	25365	R03E9.6	0.930085	-1.7979	5.14629	0.349358	0.726821	NA
WBGene00010378	18104	H12D21.2	0.486631	-1.79786	5.16043	0.348394	0.727544	NA
WBGene00173270	24902	21ur-7377	0.49927	-1.79785	5.16247	0.348254	0.727649	NA
WBGene00023030	28049	F36H12.18	0.455073	-1.7978	5.18137	0.346974	0.728611	NA
WBGene00010599	23399	K06B4.4	0.825676	-1.79727	5.3647	0.335017	0.737612	NA
WBGene00018123	17217	F36H12.9	20.4489	-1.79716	0.891724	2.01538	0.0438649	0.238778
WBGene00003425	47	msp-10	254.877	-1.79708	0.229492	7.83072	4.85089e-15	5.86347e-13
WBGene00013890	27290	ZC412.9	0.357088	-1.79679	5.55741	0.323314	0.746457	NA
WBGene00220045	46635	R31.6	0.631265	-1.79675	5.57431	0.322326	0.747205	NA
WBGene00022716	7408	irld-66	0.585718	-1.79618	5.8307	0.308055	0.758041	NA
WBGene00194884	17887	Y48B6A.17	0.52351	-1.7961	5.85974	0.306516	0.759212	NA
WBGene00010800	16052	srsx-37	0.508991	-1.79593	5.95513	0.301577	0.762975	NA
WBGene00021951	23940	srt-24	0.466205	-1.79576	6.04362	0.297133	0.766365	NA
WBGene00011548	4708	T06G6.6	47.3189	-1.79568	0.805234	2.23001	0.0257471	0.169468
WBGene00001092	5513	dro-1	0.069752	-1.79564	6.11063	0.293855	0.768869	NA
WBGene00005978	18035	srx-87	0.069752	-1.79564	6.11063	0.293855	0.768869	NA
WBGene00014411	27414	F58D5.t1	0.069752	-1.79564	6.11063	0.293855	0.768869	NA
WBGene00014639	27584	ZK1010.t1	0.069752	-1.79564	6.11063	0.293855	0.768869	NA
WBGene00019437	18234	K06A9.3	0.069752	-1.79564	6.11063	0.293855	0.768869	NA
WBGene00023070	23987	F56C3.t1	0.069752	-1.79564	6.11063	0.293855	0.768869	NA
WBGene00045929	13370	21ur-257	0.069752	-1.79564	6.11063	0.293855	0.768869	NA
WBGene00047516	30317	21ur-4743	0.069752	-1.79564	6.11063	0.293855	0.768869	NA
WBGene00048096	30830	21ur-2006	0.069752	-1.79564	6.11063	0.293855	0.768869	NA
WBGene00050954	33341	K06B4.14	0.069752	-1.79564	6.11063	0.293855	0.768869	NA
WBGene00168154	36261	21ur-5745	0.069752	-1.79564	6.11063	0.293855	0.768869	NA
WBGene00169426	24693	21ur-15109	0.069752	-1.79564	6.11063	0.293855	0.768869	NA
WBGene00169476	37428	21ur-7233	0.069752	-1.79564	6.11063	0.293855	0.768869	NA
WBGene00170185	38046	21ur-11118	0.069752	-1.79564	6.11063	0.293855	0.768869	NA
WBGene00170913	38686	21ur-6244	0.069752	-1.79564	6.11063	0.293855	0.768869	NA
WBGene00171622	24796	21ur-12252	0.069752	-1.79564	6.11063	0.293855	0.768869	NA
WBGene00172106	24829	21ur-6534	0.069752	-1.79564	6.11063	0.293855	0.768869	NA
WBGene00172112	24830	21ur-7065	0.069752	-1.79564	6.11063	0.293855	0.768869	NA
WBGene00172353	39939	21ur-14505	0.069752	-1.79564	6.11063	0.293855	0.768869	NA
WBGene00172357	39943	21ur-12639	0.069752	-1.79564	6.11063	0.293855	0.768869	NA
WBGene00172868	40378	21ur-14310	0.069752	-1.79564	6.11063	0.293855	0.768869	NA
WBGene00173323	40783	21ur-10481	0.069752	-1.79564	6.11063	0.293855	0.768869	NA
WBGene00173380	16820	21ur-10357	0.069752	-1.79564	6.11063	0.293855	0.768869	NA
WBGene00173432	40883	21ur-13768	0.069752	-1.79564	6.11063	0.293855	0.768869	NA
WBGene00173980	41361	21ur-15062	0.069752	-1.79564	6.11063	0.293855	0.768869	NA
WBGene00174687	41980	21ur-7342	0.069752	-1.79564	6.11063	0.293855	0.768869	NA
WBGene00174802	42086	21ur-10464	0.069752	-1.79564	6.11063	0.293855	0.768869	NA
WBGene00174833	42110	21ur-11453	0.069752	-1.79564	6.11063	0.293855	0.768869	NA
WBGene00174891	24984	21ur-9063	0.069752	-1.79564	6.11063	0.293855	0.768869	NA
WBGene00195012	25027	Y38C1BA.4	0.069752	-1.79564	6.11063	0.293855	0.768869	NA
WBGene00195559	42494	K07H8.14	0.069752	-1.79564	6.11063	0.293855	0.768869	NA
WBGene00196042	20308	K11C4.7	0.069752	-1.79564	6.11063	0.293855	0.768869	NA
WBGene00196077	42783	C06A1.10	0.069752	-1.79564	6.11063	0.293855	0.768869	NA
WBGene00196360	42937	R06C1.7	0.069752	-1.79564	6.11063	0.293855	0.768869	NA
WBGene00196577	43066	T28D6.12	0.069752	-1.79564	6.11063	0.293855	0.768869	NA
WBGene00196639	43100	T22C1.14	0.069752	-1.79564	6.11063	0.293855	0.768869	NA
WBGene00196694	25315	C29H12.8	0.069752	-1.79564	6.11063	0.293855	0.768869	NA
WBGene00197118	20338	C34H3.10	0.069752	-1.79564	6.11063	0.293855	0.768869	NA
WBGene00197374	25438	K04H4.11	0.069752	-1.79564	6.11063	0.293855	0.768869	NA
WBGene00197540	43600	T08H4.7	0.069752	-1.79564	6.11063	0.293855	0.768869	NA
WBGene00197559	25471	C17D12.12	0.069752	-1.79564	6.11063	0.293855	0.768869	NA
WBGene00197655	43670	F45E1.11	0.069752	-1.79564	6.11063	0.293855	0.768869	NA
WBGene00198616	20809	F14B8.13	0.069752	-1.79564	6.11063	0.293855	0.768869	NA
WBGene00199024	44424	C34F11.13	0.069752	-1.79564	6.11063	0.293855	0.768869	NA
WBGene00199649	44792	F46G11.15	0.069752	-1.79564	6.11063	0.293855	0.768869	NA
WBGene00199927	44947	Y77E11A.20	0.069752	-1.79564	6.11063	0.293855	0.768869	NA
WBGene00199932	44951	B0273.112	0.069752	-1.79564	6.11063	0.293855	0.768869	NA
WBGene00201005	16910	M04B2.11	0.069752	-1.79564	6.11063	0.293855	0.768869	NA
WBGene00201018	16911	F56C11.7	0.069752	-1.79564	6.11063	0.293855	0.768869	NA
WBGene00201316	45730	C47C12.9	0.069752	-1.79564	6.11063	0.293855	0.768869	NA
WBGene00219585	15945	linc-170	0.069752	-1.79564	6.11063	0.293855	0.768869	NA
WBGene00255543	19453	Y41E3.466	0.069752	-1.79564	6.11063	0.293855	0.768869	NA
WBGene00166421	34695	21ur-9531	0.138787	-1.79564	6.11063	0.293855	0.768869	NA
WBGene00166496	21293	21ur-14701	0.138787	-1.79564	6.11063	0.293855	0.768869	NA
WBGene00049888	32436	21ur-1334	0.182504	-1.79564	6.11063	0.293855	0.768869	NA
WBGene00004159	26560	pqn-78	0.22789	-1.79564	6.11063	0.293855	0.768869	NA
WBGene00006170	26981	str-119	0.23679	-1.79564	6.11063	0.293855	0.768869	NA
WBGene00021573	23925	Y45G12C.10	0.23679	-1.79564	6.11063	0.293855	0.768869	NA
WBGene00170977	24765	21ur-15284	0.22329	-1.79564	6.11063	0.293855	0.768869	NA
WBGene00168081	36192	21ur-13320	0.23987	-1.79564	6.11063	0.293855	0.768869	NA
WBGene00195766	21337	F10C1.12	0.426734	-1.79564	6.11063	0.293855	0.768869	NA
WBGene00172934	40441	21ur-11775	0.451932	-1.79564	6.11063	0.293855	0.768869	NA
WBGene00000721	16475	col-148	0.425999	-1.79564	6.11063	0.293855	0.768869	NA
WBGene00009540	23355	hlh-31	0.360893	-1.79564	6.11063	0.293855	0.768869	NA
WBGene00015656	27711	srz-70	0.42645	-1.79564	6.11063	0.293855	0.768869	NA
WBGene00007535	23294	ttr-19	0.352833	-1.79564	6.11063	0.293855	0.768869	NA
WBGene00166372	19363	21ur-14887	0.431794	-1.79564	6.11063	0.293855	0.768869	NA
WBGene00196572	20763	Y75B8A.47	0.423948	-1.79564	6.11063	0.293855	0.768869	NA
WBGene00196780	17374	C17E4.15	0.448785	-1.79564	6.11063	0.293855	0.768869	NA
WBGene00219627	1990	anr-3	0.170944	-1.79564	6.11063	0.293855	0.768869	NA
WBGene00198846	44335	Y75B8A.52	0.247711	-1.79564	6.11063	0.293855	0.768869	NA
WBGene00165201	16792	21ur-7232	0.229409	-1.79564	6.11063	0.293855	0.768869	NA
WBGene00199381	44634	F45G2.11	0.405911	-1.79564	6.11063	0.293855	0.768869	NA
WBGene00201098	10954	T21C9.16	0.298303	-1.79564	6.11063	0.293855	0.768869	NA
WBGene00045682	24149	21ur-527	0.319506	-1.79564	6.11063	0.293855	0.768869	NA
WBGene00014652	16093	B0399.t9	0.425425	-1.79564	6.11063	0.293855	0.768869	NA
WBGene00046313	29228	21ur-3912	0.229128	-1.79564	6.11063	0.293855	0.768869	NA
WBGene00045086	28414	Y43B11AR.7	0.209943	-1.79564	6.11063	0.293855	0.768869	NA
WBGene00023320	8416	K07E8.4	0.282548	-1.79564	6.11063	0.293855	0.768869	NA
WBGene00201201	26154	C01G12.14	0.316379	-1.79564	6.11063	0.293855	0.768869	NA
WBGene00046890	13372	21ur-5250	0.399245	-1.79564	6.11063	0.293855	0.768869	NA
WBGene00047874	24279	21ur-2637	0.115339	-1.79564	6.11063	0.293855	0.768869	NA
WBGene00172394	24848	21ur-6975	0.115339	-1.79564	6.11063	0.293855	0.768869	NA
WBGene00170131	24727	21ur-7585	0.118598	-1.79564	6.11063	0.293855	0.768869	NA
WBGene00196046	25191	F33G12.8	0.118598	-1.79564	6.11063	0.293855	0.768869	NA
WBGene00010417	23394	clpr-3	0.132558	-1.79564	6.11063	0.293855	0.768869	NA
WBGene00046527	24195	21ur-4795	0.132558	-1.79564	6.11063	0.293855	0.768869	NA
WBGene00200359	45185	F18E2.13	0.132558	-1.79564	6.11063	0.293855	0.768869	NA
WBGene00219816	16452	C14E2.12	0.132558	-1.79564	6.11063	0.293855	0.768869	NA
WBGene00018684	27824	fbxa-41	0.178369	-1.79564	6.11063	0.293855	0.768869	NA
WBGene00173062	40556	21ur-15287	0.164185	-1.79564	6.11063	0.293855	0.768869	NA
WBGene00202434	26370	K03C7.15	0.24902	-1.79564	6.11063	0.293855	0.768869	NA
WBGene00202144	26321	C24A1.7	0.27197	-1.79564	6.11063	0.293855	0.768869	NA
WBGene00197442	43539	B0491.9	0.168794	-1.79564	6.11063	0.293855	0.768869	NA
WBGene00196756	43161	C36F7.9	0.160926	-1.79564	6.11063	0.293855	0.768869	NA
WBGene00202262	46279	T12C9.10	0.160926	-1.79564	6.11063	0.293855	0.768869	NA
WBGene00010939	12633	M163.7	0.167444	-1.79564	6.11063	0.293855	0.768869	NA
WBGene00173345	16819	21ur-12912	0.167444	-1.79564	6.11063	0.293855	0.768869	NA
WBGene00170443	38270	21ur-7742	0.195365	-1.79564	6.11063	0.293855	0.768869	NA
WBGene00170298	24737	21ur-9158	0.177063	-1.79564	6.11063	0.293855	0.768869	NA
WBGene00197492	9960	T06H11.10	0.174444	-1.79564	6.11063	0.293855	0.768869	NA
WBGene00047818	24273	21ur-1963	0.230719	-1.79564	6.11063	0.293855	0.768869	NA
WBGene00047102	20180	21ur-5094	0.267835	-1.79564	6.11063	0.293855	0.768869	NA
WBGene00044136	28310	F23D12.8	0.313557	-1.79564	6.11063	0.293855	0.768869	NA
WBGene00199858	25907	C40H5.15	0.279136	-1.79564	6.11063	0.293855	0.768869	NA
WBGene00169217	37199	21ur-8500	0.332607	-1.79564	6.11063	0.293855	0.768869	NA
WBGene00022095	9385	Y69A2AR.24	0.479759	-1.79564	6.11063	0.293855	0.768869	NA
WBGene00044128	20627	BE10.6	0.294406	-1.79564	6.11063	0.293855	0.768869	NA
WBGene00049071	31695	21ur-5407	0.302237	-1.79564	6.11063	0.293855	0.768869	NA
WBGene00201942	13946	F12F6.19	0.281755	-1.79564	6.11063	0.293855	0.768869	NA
WBGene00014526	27499	T22A3.t2	0.304205	-1.79564	6.11063	0.293855	0.768869	NA
WBGene00173778	24933	21ur-9441	0.341925	-1.79564	6.11063	0.293855	0.768869	NA
WBGene00045112	28428	K12D12.8	0.41439	-1.79564	6.11063	0.293855	0.768869	NA
WBGene00199784	25894	F08G5.16	0.520759	-1.79564	6.11063	0.293855	0.768869	NA
WBGene00012633	22647	Y38H6C.21	0.610682	-1.79564	6.11063	0.293855	0.768869	NA
WBGene00045150	24118	ZK265.10	0.409331	-1.79564	6.11063	0.293855	0.768869	NA
WBGene00201423	20890	ZK546.20	0.399948	-1.79564	6.11063	0.293855	0.768869	NA
WBGene00017630	23782	F20B6.6	0.489265	-1.79564	6.11063	0.293855	0.768869	NA
WBGene00045118	19343	T04A8.17	0.502248	-1.79564	6.11063	0.293855	0.768869	NA
WBGene00172334	15884	21ur-11274	0.168773	-1.79563	6.11063	0.293854	0.76887	NA
WBGene00199720	16894	C13A10.4	0.373777	-1.79563	6.11063	0.293854	0.76887	NA
WBGene00197833	12428	C38C5.2	0.215469	-1.79563	6.11063	0.293854	0.76887	NA
WBGene00047751	24268	21ur-2767	0.367653	-1.79563	6.11063	0.293854	0.76887	NA
WBGene00005483	26683	srh-278	0.325794	-1.79563	6.11063	0.293854	0.76887	NA
WBGene00166520	13883	21ur-14531	0.292085	-1.79563	6.11063	0.293854	0.76887	NA
WBGene00196128	3970	Y51A2D.25	0.266766	-1.79563	6.11063	0.293854	0.76887	NA
WBGene00201693	18930	Y38F2AL.11	0.35119	-1.79563	6.11063	0.293854	0.76887	NA
WBGene00169940	16245	21ur-13251	0.416336	-1.79563	6.11063	0.293854	0.76887	NA
WBGene00005456	21010	srh-250	0.458501	-1.79563	6.11063	0.293854	0.76887	NA
WBGene00219568	21948	anr-9	0.433835	-1.79563	6.11063	0.293854	0.76887	NA
WBGene00167786	35929	21ur-9657	0.336829	-1.79563	6.11063	0.293853	0.76887	NA
WBGene00048349	17322	21ur-296	0.33866	-1.79563	6.11063	0.293853	0.76887	NA
WBGene00200432	20855	C13A10.5	0.163102	-1.79563	6.11063	0.293853	0.76887	NA
WBGene00019857	27870	R03H10.5	0.303702	-1.79562	6.11062	0.293853	0.76887	NA
WBGene00220179	46704	Y54E10A.29	0.293242	-1.79562	6.11062	0.293853	0.76887	NA
WBGene00195436	25076	Y69A2AR.37	0.29752	-1.79562	6.11062	0.293853	0.76887	NA
WBGene00168409	36489	21ur-8530	0.240896	-1.79562	6.11062	0.293853	0.768871	NA
WBGene00044967	28382	smy-9	0.399732	-1.79562	6.11062	0.293853	0.768871	NA
WBGene00195450	20288	F35G12.14	0.370439	-1.79562	6.11062	0.293853	0.768871	NA
WBGene00006003	23226	srx-112	0.469481	-1.79562	6.11062	0.293853	0.768871	NA
WBGene00196346	22899	T02E9.13	0.505493	-1.79562	6.11062	0.293853	0.768871	NA
WBGene00008906	19079	oac-17	0.454938	-1.79562	6.11062	0.293853	0.768871	NA
WBGene00013820	20543	Y116F11B.2	0.483688	-1.79562	6.11062	0.293853	0.768871	NA
WBGene00003337	14019	mir-243	0.457689	-1.79562	6.11062	0.293852	0.768871	NA
WBGene00014781	15200	F59A1.t1	0.372163	-1.79562	6.11062	0.293852	0.768871	NA
WBGene00195609	20748	Y41C4A.23	0.523285	-1.79562	6.11062	0.293852	0.768871	NA
WBGene00010866	13132	M04D8.8	0.441558	-1.79562	6.11062	0.293852	0.768871	NA
WBGene00015409	18704	C03H5.7	12.6839	-1.79437	0.997258	1.7993	0.0719707	0.322279
WBGene00219557	13958	anr-14	0.813603	-1.7921	3.03744	0.590005	0.555188	NA
WBGene00016943	18725	acdh-1	13624.4	-1.79139	0.196522	9.11548	7.83256e-20	1.50484e-17
WBGene00003470	2052	msp-152	729.935	-1.79137	0.205399	8.7214	2.74787e-18	4.6439e-16
WBGene00005528	6572	sri-16	8.863	-1.79059	1.28531	1.39311	0.163585	0.514964
WBGene00009377	22597	F34D10.8	59.3425	-1.78898	0.432876	4.13278	3.58406e-05	0.000893665
WBGene00197145	15912	W08F4.15	0.859	-1.78822	4.50686	0.396777	0.691532	NA
WBGene00019614	15270	srt-54	19.2899	-1.78807	1.05356	1.69717	0.0896637	0.369089
WBGene00013087	7730	Y51B9A.5	12.3413	-1.78753	1.03548	1.72628	0.0842973	0.356635
WBGene00007654	7105	C17H1.1	5.43257	-1.78609	1.58997	1.12334	0.261292	0.6406
WBGene00195006	11919	C35B1.9	0.896072	-1.78456	4.96306	0.359569	0.719169	NA
WBGene00014375	3277	F44D12.11	10.0349	-1.78447	1.1488	1.55333	0.120344	0.438786
WBGene00016212	17687	C29F5.3	22.3662	-1.78386	0.804336	2.2178	0.0265684	0.172879
WBGene00006006	23227	srx-115	2.07023	-1.7838	2.63094	0.678008	0.497767	NA
WBGene00004001	1559	pgp-7	216.055	-1.78025	0.394707	4.5103	6.47346e-06	0.000197581
WBGene00013044	8717	Y49E10.25	3.11335	-1.77931	2.27053	0.783654	0.433243	0.791071
WBGene00015026	5265	B0207.1	21.7828	-1.77931	0.821988	2.16464	0.0304155	0.188725
WBGene00012827	12180	Y43F8C.5	85.946	-1.77711	0.376969	4.71422	2.42643e-06	8.27763e-05
WBGene00018711	17226	F52G3.3	23.6855	-1.77374	0.742557	2.3887	0.0169083	0.126874
WBGene00219460	14956	K09H9.9	9.27377	-1.77149	1.38417	1.27982	0.20061	0.566154
WBGene00044551	14358	ZK105.8	3.11023	-1.7712	1.51095	1.17224	0.2411	0.619796
WBGene00235129	22946	ZC518.8	2.72762	-1.77065	2.4592	0.720007	0.47152	0.814611
WBGene00010662	11654	K08E3.2	2.30114	-1.76777	2.53384	0.697666	0.485386	NA
WBGene00005013	13038	jmjd-1.1	29.4202	-1.76282	0.621663	2.83565	0.00457326	0.0496852
WBGene00009134	16571	lurp-2	2.08074	-1.7608	2.74954	0.6404	0.521912	NA
WBGene00022567	4426	ZC239.4	7.35915	-1.75744	1.29978	1.35211	0.17634	0.532516
WBGene00013154	23544	Y53F4B.7	4.6939	-1.75529	1.45269	1.2083	0.226931	0.601327
WBGene00016239	6312	C30A5.4	5.45145	-1.75174	1.33107	1.31603	0.188163	0.549287
WBGene00012039	13161	T26E3.6	2.71256	-1.75088	3.1885	0.549124	0.58292	0.87427
WBGene00171890	16255	21ur-9852	0.518021	-1.7505	4.90154	0.357132	0.720993	NA
WBGene00003443	2554	msp-50	602.965	-1.74807	0.179557	9.73546	2.12849e-22	5.17988e-20
WBGene00023515	15342	srz-97	7.5413	-1.7474	1.24872	1.39936	0.161706	0.511763
WBGene00018911	23826	F56A4.3	75.8314	-1.74675	0.418526	4.17359	2.99842e-05	0.000766486
WBGene00019026	4355	F58A6.9	89.7589	-1.7465	0.367347	4.75434	1.99092e-06	6.9084e-05
WBGene00003442	1552	msp-49	379.903	-1.74551	0.229407	7.60878	2.76706e-14	3.09842e-12
WBGene00235286	20946	C01F6.16	1.9578	-1.74206	2.3769	0.732912	0.463612	NA
WBGene00219647	9976	anr-27	10.8969	-1.74198	0.911255	1.91163	0.0559234	0.276092
WBGene00195214	2978	F11C1.10	6.50644	-1.73114	1.49258	1.15983	0.246118	0.626257
WBGene00005669	26729	sru-6	0.649989	-1.73095	5.89377	0.293691	0.768994	NA
WBGene00189944	14888	E03A3.10	10.4871	-1.72854	0.925647	1.86738	0.061848	0.294803
WBGene00014996	14689	ZK1251.5	15.2759	-1.72512	1.06866	1.61428	0.106468	0.408588
WBGene00003438	3056	msp-45	499.322	-1.72187	0.219431	7.84697	4.26194e-15	5.22073e-13
WBGene00020650	17768	T21D12.11	5.13108	-1.72036	1.30679	1.31648	0.188014	0.549148
WBGene00022874	14822	nep-25	20.1374	-1.71982	0.677728	2.53763	0.0111607	0.0937866
WBGene00201372	17922	W06H8.15	3.12084	-1.71965	1.51634	1.13408	0.25676	0.637527
WBGene00000646	8497	H17B01.2	38.4586	-1.71485	0.45551	3.76469	0.000166755	0.00334499
WBGene00044979	15859	Y41E3.19	9.77009	-1.71282	1.35584	1.26329	0.206486	0.573547
WBGene00022327	19317	fbxa-15	45.9256	-1.71132	0.617911	2.76953	0.00561376	0.0576279
WBGene00007325	16540	C05C9.1	14.1443	-1.71069	0.82154	2.0823	0.0373149	0.214267
WBGene00007946	6616	ugt-33	128.725	-1.70866	0.431102	3.96347	7.3868e-05	0.00169377
WBGene00014691	20555	C33A11.t1	1.89621	-1.70809	1.74617	0.978191	0.32798	NA
WBGene00009972	2688	oac-33	32.6216	-1.70591	0.69695	2.44768	0.0143779	0.113752
WBGene00004240	3078	puf-4	24.0828	-1.70239	0.829544	2.05219	0.0401507	0.224933
WBGene00200204	3977	F57F5.7	0.796395	-1.7012	5.14295	0.330783	0.740808	NA
WBGene00015990	17190	C18H2.3	12.3771	-1.6985	1.2714	1.33593	0.181572	0.539749
WBGene00009269	11629	F30A10.12	34.3462	-1.69788	0.703759	2.41259	0.0158395	0.121676
WBGene00013844	5245	fbxa-50	56.8467	-1.69664	0.581332	2.91854	0.0035168	0.0406257
WBGene00014104	18688	ZK849.6	16.8786	-1.69548	0.795615	2.13103	0.0330865	0.199306
WBGene00200685	26054	D2023.17	1.03182	-1.69403	4.04964	0.418317	0.675716	NA
WBGene00020877	13819	srt-63	10.5219	-1.69092	1.09647	1.54214	0.123039	0.443172
WBGene00013192	14667	Y54E2A.7	53.033	-1.69038	0.669768	2.52383	0.0116085	0.0964402
WBGene00006244	26999	str-211	1.34048	-1.68782	3.5233	0.479045	0.631906	NA
WBGene00017704	16122	F22E5.2	1.13999	-1.6877	3.51504	0.480137	0.63113	NA
WBGene00019626	7857	K10C9.7	52.9564	-1.68468	0.564261	2.98563	0.00282994	0.0341163
WBGene00016053	22206	ptp-5.1	61.7217	-1.68301	0.410508	4.09982	4.13466e-05	0.00101569
WBGene00000702	17478	col-128	13.7386	-1.67876	1.27287	1.31887	0.187211	0.547856
WBGene00197767	43736	B0285.15	0.344226	-1.67604	6.02148	0.278343	0.780749	NA
WBGene00049984	32525	21ur-4245	0.411351	-1.67603	6.02148	0.278342	0.78075	NA
WBGene00166131	24536	21ur-8446	0.357897	-1.67603	6.02148	0.278342	0.78075	NA
WBGene00195276	42348	T27E4.13	0.258654	-1.67603	6.02148	0.278342	0.78075	NA
WBGene00172469	17876	21ur-5862	0.549421	-1.67472	5.76375	0.290561	0.771387	NA
WBGene00020805	6868	T25F10.1	0.560522	-1.67398	5.6338	0.297132	0.766365	NA
WBGene00077718	14374	mir-1824	0.686712	-1.67248	5.39469	0.310024	0.756543	NA
WBGene00019668	19272	fil-2	9.63049	-1.67223	1.0105	1.65486	0.0979531	0.388298
WBGene00169565	24706	21ur-10180	0.992193	-1.66788	4.82461	0.345702	0.729567	NA
WBGene00194787	9443	T16G1.13	15.834	-1.66709	0.832903	2.00154	0.045334	0.243006
WBGene00012940	3257	Y47D3B.3	13.3831	-1.66704	1.2563	1.32695	0.184526	0.544012
WBGene00012741	16619	Y40H4A.2	49.6509	-1.66476	0.428857	3.88184	0.000103667	0.00225254
WBGene00020944	21213	W02D7.9	8.89193	-1.66405	1.20548	1.3804	0.167464	0.520795
WBGene00021592	23927	Y46E12A.2	3.01197	-1.66339	1.88714	0.881433	0.378083	0.754843
WBGene00015491	19192	C05E4.12	2.70073	-1.66337	1.88779	0.881123	0.378251	0.755013
WBGene00010067	18619	dot-1.2	13.067	-1.66143	1.18552	1.40144	0.161083	0.510877
WBGene00010083	696	xdh-1	1993.42	-1.66136	0.143096	11.6101	3.6603e-31	1.48462e-28
WBGene00003469	11531	msp-142	241.879	-1.66123	0.392499	4.23245	2.31159e-05	0.000605324
WBGene00219886	10969	F09E10.15	44.1198	-1.66069	0.707846	2.34611	0.0189704	0.136585
WBGene00018993	10793	nhr-266	8.00127	-1.66011	1.31017	1.2671	0.205121	0.572106
WBGene00016963	21163	C56C10.6	23.2792	-1.65883	0.840737	1.97307	0.0484874	0.253579
WBGene00022213	18828	Y73B3A.11	2.48294	-1.65734	2.16458	0.765665	0.443876	0.798047
WBGene00019190	9838	H12I13.1	13.3379	-1.65485	1.38474	1.19506	0.232064	0.608556
WBGene00005569	16001	sri-57	2.68622	-1.65421	3.17208	0.521491	0.602025	0.882959
WBGene00003448	14022	msp-55	367.384	-1.65319	0.298949	5.53	3.20232e-08	1.59261e-06
WBGene00022440	8407	Y110A2AL.3	33.8904	-1.65294	0.648832	2.54757	0.0108477	0.092175
WBGene00011882	17618	nstp-9	1.89902	-1.65271	2.33632	0.707398	0.479319	NA
WBGene00166751	24577	21ur-6076	1.04505	-1.65244	3.77854	0.437322	0.661878	NA
WBGene00010706	4691	cyp-14A2	110.071	-1.65103	0.359651	4.59064	4.41886e-06	0.000141249
WBGene00045098	24111	VY10G11R.3	1.31151	-1.6506	3.69821	0.446323	0.655364	NA
WBGene00007344	2120	C05E7.2	73.7009	-1.65033	0.412097	4.0047	6.20953e-05	0.0014624
WBGene00206381	8966	F52H2.15	4.79802	-1.64918	1.60534	1.02731	0.304275	0.687755
WBGene00044503	9917	Y73B6A.6	19.5789	-1.64776	0.826262	1.99424	0.0461263	0.245594
WBGene00022875	23967	ZK1248.4	2.03055	-1.64709	1.86971	0.880934	0.378353	NA
WBGene00044015	19327	K06A4.8	20.5934	-1.64559	0.698706	2.3552	0.0185129	0.134836
WBGene00044020	5933	ZK856.14	15.7213	-1.64396	0.846893	1.94117	0.0522382	0.265956
WBGene00045082	14844	F46F11.12	3.17873	-1.64252	1.87416	0.876404	0.38081	0.757126
WBGene00007721	9111	C25D7.12	9.88135	-1.64136	1.55784	1.05361	0.29206	0.674022
WBGene00201783	46006	R10D12.19	0.673193	-1.63986	5.89608	0.278127	0.780915	NA
WBGene00001668	3028	gpa-6	16.277	-1.6394	0.890604	1.84077	0.0656548	0.304922
WBGene00005400	14049	srh-185	0.36627	-1.63833	6.01928	0.272181	0.785483	NA
WBGene00008433	14585	2025-03-02	23.2285	-1.63832	0.809651	2.02349	0.0430222	0.23571
WBGene00169510	37460	21ur-6741	0.403774	-1.63831	6.01927	0.272177	0.785486	NA
WBGene00219773	46494	linc-32	0.568636	-1.63767	5.77474	0.283592	0.776723	NA
WBGene00014513	15673	T10B9.t1	0.590621	-1.63747	5.69446	0.287555	0.773688	NA
WBGene00003467	13518	msp-81	799.659	-1.63677	0.251362	6.5116	7.43535e-11	5.5538e-09
WBGene00015572	18174	C07G1.6	27.7448	-1.6344	0.869322	1.88008	0.0600969	0.289112
WBGene00017122	19710	pcrg-1	12.495	-1.63351	0.911921	1.79128	0.0732479	0.326396
WBGene00020860	3405	nspd-10	141.191	-1.63254	0.646764	2.52416	0.0115975	0.0964362
WBGene00020173	11817	T02H6.3	3.10875	-1.63229	2.63539	0.619372	0.535672	0.853007
WBGene00016447	4806	msd-4	657.734	-1.6319	0.268001	6.08915	1.13509e-09	7.16877e-08
WBGene00219453	26423	linc-97	1.87753	-1.62866	3.05142	0.533738	0.593523	NA
WBGene00047130	18335	21ur-1301	0.989683	-1.62842	2.56409	0.635087	0.525372	NA
WBGene00003462	13013	msp-74	4.99064	-1.62726	1.25824	1.29328	0.195914	0.559685
WBGene00012146	18651	VB0393L.2	26.7355	-1.62591	0.668385	2.4326	0.0149908	0.117279
WBGene00018751	20584	F53C3.7	1.04738	-1.62577	3.92321	0.414398	0.678582	NA
WBGene00005292	14047	srh-71	16.9361	-1.62453	0.832134	1.95224	0.0509094	0.26182
WBGene00173294	7939	21ur-10653	5.37365	-1.62422	1.21257	1.33948	0.180413	0.537953
WBGene00003522	21990	nas-3	121.621	-1.62373	0.306344	5.30035	1.15583e-07	5.02292e-06
WBGene00005748	23161	srw-1	1.94659	-1.62327	2.9147	0.556926	0.577578	NA
WBGene00019950	18778	clec-175	34.7884	-1.6219	0.83307	1.94689	0.0515473	0.263985
WBGene00005571	13549	sri-59	3.4327	-1.62157	1.94823	0.83233	0.405223	0.776279
WBGene00044394	14829	B0034.7	17.0246	-1.61907	0.967234	1.67392	0.094147	0.379331
WBGene00002208	20978	kin-26	32.2378	-1.61721	0.633381	2.5533	0.0106709	0.0915036
WBGene00015331	10243	C02B10.6	17.9078	-1.61377	0.799371	2.0188	0.0435081	0.237473
WBGene00017542	9303	F17E9.5	446.2	-1.61352	0.271159	5.95045	2.67399e-09	1.59496e-07
WBGene00044922	1966	Y43C5A.7	49.2055	-1.6127	0.709297	2.27366	0.0229866	0.156257
WBGene00014154	17661	ZK930.4	39.6648	-1.6116	0.710139	2.26941	0.0232431	0.157357
WBGene00171255	15386	21ur-6778	0.888051	-1.61157	3.21446	0.50135	0.616125	NA
WBGene00018627	12267	F49D11.3	15.1947	-1.61059	0.700232	2.30007	0.021444	0.149415
WBGene00021947	23938	srt-23	2.09508	-1.60968	2.3707	0.678987	0.497146	NA
WBGene00021002	5892	W03F9.4	127.882	-1.60844	0.470395	3.41934	0.000627727	0.0102388
WBGene00196854	21356	CD4.13	3.46046	-1.60828	2.33416	0.689019	0.490811	0.827576
WBGene00201670	17923	Y48B6A.23	1.90661	-1.6064	2.68819	0.597575	0.550124	NA
WBGene00008792	19592	F14D7.5	8.61707	-1.60382	0.982215	1.63287	0.102497	0.398887
WBGene00015422	17179	C04E6.5	28.6099	-1.6022	0.655195	2.44537	0.0144702	0.114334
WBGene00201620	22927	C53B7.12	2.25621	-1.60215	2.63602	0.607791	0.543326	NA
WBGene00006661	15048	twk-6	9.05298	-1.60093	1.13848	1.4062	0.159664	0.508669
WBGene00044386	17835	C27A2.7	3.32552	-1.6007	2.16561	0.739147	0.459818	0.80838
WBGene00011249	4205	R11G10.2	6.77034	-1.60049	1.32008	1.21242	0.225351	0.599317
WBGene00020913	22305	W01B11.1	9.23943	-1.59821	1.02606	1.55761	0.119325	0.437245
WBGene00202441	14443	F35C12.6	2.68136	-1.59819	2.59089	0.616851	0.537333	0.853683
WBGene00021768	19308	Y51F10.7	2581.01	-1.59786	0.516841	3.09158	0.00199091	0.0259743
WBGene00018792	19251	F54C1.8	45.6082	-1.59728	0.498741	3.20261	0.00136187	0.0192988
WBGene00008160	13085	glct-4	1.73913	-1.59405	2.78581	0.572201	0.567186	NA
WBGene00013293	16627	Y57G11A.5	3.27871	-1.59339	2.04206	0.780283	0.435224	0.792428
WBGene00219314	22434	C05B5.17	3.70783	-1.59145	2.52079	0.631331	0.527824	0.847931
WBGene00013830	22666	ZC15.1	3.39469	-1.59072	2.00355	0.793949	0.427225	0.788684
WBGene00000618	12985	col-41	94.9063	-1.58946	0.511833	3.10542	0.00190008	0.024914
WBGene00235295	13465	C42D4.19	7.96827	-1.58866	1.01429	1.56628	0.117283	0.433242
WBGene00018359	22748	F42G8.8	54.1366	-1.58677	0.608658	2.607	0.00913389	0.0817214
WBGene00007598	14083	C15A11.4	80.7921	-1.58579	0.376076	4.21667	2.47935e-05	0.000643713
WBGene00021373	19301	Y37E11AR.7	10.1959	-1.58574	0.895374	1.77104	0.0765545	0.335721
WBGene00021113	19295	gsp-3	309.244	-1.58481	0.213338	7.42865	1.09715e-13	1.13137e-11
WBGene00011077	7689	R07B1.5	6.17441	-1.58449	1.69621	0.934133	0.350235	0.733505
WBGene00015601	797	fbxa-166	11.1201	-1.58371	0.912772	1.73505	0.0827316	0.352287
WBGene00007503	9618	C09H10.9	40.7495	-1.5828	0.618753	2.55805	0.0105261	0.0907522
WBGene00008772	9632	irld-4	21.1307	-1.58271	0.609136	2.59829	0.00936905	0.0833759
WBGene00017821	14735	F26D11.4	3.38225	-1.58259	1.974	0.801719	0.422716	0.786437
WBGene00019638	4878	K10F12.6	15.7868	-1.58246	0.758385	2.08662	0.0369228	0.212725
WBGene00000788	16	cpz-1	23198.9	-1.58183	0.104921	15.0763	2.31864e-51	2.64499e-48
WBGene00022445	1436	Y110A2AL.9	62.82	-1.58083	0.554762	2.84955	0.00437805	0.0481085
WBGene00003460	11530	msp-71	51.1084	-1.58005	0.500926	3.15427	0.00160901	0.0217861
WBGene00077503	15869	AC3.12	4.32531	-1.57966	1.87101	0.844284	0.398511	0.771001
WBGene00018227	19728	nep-15	15.4726	-1.57868	1.18549	1.33167	0.18297	0.541786
WBGene00219554	13957	W03D2.11	2.73031	-1.57503	2.10561	0.748014	0.454451	0.804815
WBGene00003452	9550	msp-59	883.342	-1.57346	0.229057	6.8693	6.45193e-12	5.45188e-10
WBGene00016420	7278	C34G6.3	51.7552	-1.5729	0.494075	3.18353	0.00145494	0.0202097
WBGene00016487	10741	C36C9.4	3.74677	-1.57024	1.92168	0.817119	0.41386	0.78237
WBGene00015917	15215	C17G10.3	50.34	-1.568	0.470424	3.33317	0.000858635	0.0132029
WBGene00013474	3748	Y69E1A.2	784.312	-1.56733	0.200073	7.83379	4.73382e-15	5.76011e-13
WBGene00044912	22851	H38K22.7	6.19904	-1.56632	1.18685	1.31973	0.186926	0.547373
WBGene00005299	22521	srh-78	3.52167	-1.5647	1.46723	1.06643	0.28623	0.667532
WBGene00196679	25313	F10G8.11	2.08993	-1.5626	2.38814	0.654318	0.512907	NA
WBGene00018542	12772	nhr-187	9.05757	-1.56234	1.37279	1.13808	0.255087	0.63548
WBGene00005096	10063	srd-18	4.89115	-1.56157	1.3877	1.12529	0.260466	0.639928
WBGene00017731	1832	F23C8.1	22.7237	-1.56008	0.578889	2.69496	0.00703969	0.0680042
WBGene00001912	2538	his-38	90.3324	-1.55912	0.455632	3.42188	0.000621903	0.010162
WBGene00003458	5047	msp-65	435.575	-1.55509	0.208635	7.45365	9.07933e-14	9.5239e-12
WBGene00201538	13943	C55A6.19	1.89853	-1.55189	2.19213	0.707936	0.478985	NA
WBGene00018092	7828	F36F12.1	1.86447	-1.5508	2.64362	0.586619	0.557459	NA
WBGene00016861	27758	C50H11.17	3.91626	-1.55029	1.22551	1.26502	0.205865	0.572954
WBGene00003435	14021	msp-40	789.052	-1.55011	0.331696	4.67327	2.96436e-06	9.85529e-05
WBGene00007960	10106	C35D6.3	3.46697	-1.54829	2.17895	0.710568	0.477352	0.818825
WBGene00018448	17730	F45D11.1	48.3895	-1.54472	0.520187	2.96955	0.00298236	0.0354912
WBGene00012837	23537	Y43F8C.16	1.47122	-1.54444	3.40127	0.454076	0.649774	NA
WBGene00220047	26869	R74.11	2.8975	-1.54155	2.02113	0.762719	0.445631	0.798295
WBGene00016658	13231	C45B2.1	4341.47	-1.54134	0.206618	7.45987	8.66075e-14	9.13734e-12
WBGene00012191	14652	W02A2.8	49.1108	-1.54075	0.6403	2.40629	0.0161154	0.123077
WBGene00021154	9876	Y4C6A.4	17.6924	-1.54002	0.87078	1.76855	0.0769687	0.337052
WBGene00194821	22394	dmsr-16	5.16034	-1.53719	1.45945	1.05327	0.292217	0.674022
WBGene00020262	11819	ferl-1	5.56269	-1.53403	1.81119	0.846978	0.397008	0.769782
WBGene00003446	10035	msp-53	625.293	-1.53277	0.199024	7.70142	1.34559e-14	1.54107e-12
WBGene00013074	1243	hmit-1.2	272.585	-1.5315	0.229372	6.67694	2.43986e-11	1.93619e-09
WBGene00000753	4503	col-180	647.586	-1.53136	0.220138	6.95638	3.49116e-12	3.01994e-10
WBGene00009682	8156	msd-2	342.8	-1.53101	0.350921	4.36283	1.28391e-05	0.000361077
WBGene00021630	8876	Y47D9A.3	10.1218	-1.5306	1.08917	1.40529	0.159936	0.508964
WBGene00001603	13998	gln-2	249.407	-1.52798	0.302178	5.05654	4.26927e-07	1.69766e-05
WBGene00016662	7287	C45B2.8	46.1481	-1.52784	0.833695	1.83261	0.0668605	0.308421
WBGene00009073	23341	delm-1	3.53231	-1.52626	2.13945	0.713392	0.475603	0.81824
WBGene00006051	9587	ssq-2	1395.72	-1.52552	0.205538	7.42208	1.15296e-13	1.18224e-11
WBGene00006005	19542	srx-114	2.81927	-1.52465	2.29117	0.665448	0.505764	0.836704
WBGene00021006	17774	dct-9	34.0529	-1.52291	0.6393	2.38216	0.0172116	0.128485
WBGene00002204	1048	kin-21	27.2752	-1.5228	0.77013	1.97733	0.0480049	0.252067
WBGene00020791	23894	T25B6.5	3.65994	-1.52276	2.10785	0.722421	0.470035	0.814187
WBGene00013523	6255	Y73F8A.14	18.3644	-1.52097	0.976332	1.55784	0.119271	0.437135
WBGene00019406	7852	acdh-8	290.052	-1.51687	0.259524	5.84482	5.07131e-09	2.92916e-07
WBGene00014997	8742	AC7.3	13.2923	-1.51659	1.48703	1.01988	0.307786	0.691456
WBGene00020070	10326	rmd-6	72.7913	-1.51537	0.392509	3.86073	0.000113051	0.0024049
WBGene00018158	18738	comp-1	76.7169	-1.51371	0.555087	2.72698	0.00639177	0.0630051
WBGene00018173	12260	F38B6.3	12.7201	-1.51256	0.870421	1.73773	0.0822585	0.351201
WBGene00012690	6231	Y39B6A.31	15.4704	-1.51216	0.919406	1.64471	0.10003	0.392462
WBGene00021970	13316	srz-64	3.40564	-1.51215	1.64287	0.920432	0.357347	0.738424
WBGene00018253	15742	F40H6.1	57.903	-1.50775	0.570321	2.64369	0.00820071	0.0752914
WBGene00004973	9065	spe-27	9.68831	-1.50659	1.1261	1.33789	0.180934	0.538464
WBGene00020019	11315	R12B2.3	32.0549	-1.5065	0.5734	2.62731	0.0086064	0.0779573
WBGene00001483	1040	fog-3	19.8315	-1.50593	0.780508	1.92942	0.0536788	0.269995
WBGene00009344	10128	F32H2.7	256.149	-1.50492	0.329386	4.56887	4.9036e-06	0.000153781
WBGene00043120	15841	C09H10.4	3.30567	-1.50424	2.00374	0.750719	0.452822	0.803666
WBGene00001716	543	grl-7	124.691	-1.50298	0.335509	4.47971	7.47453e-06	0.000225124
WBGene00010474	17113	K01D12.15	44.0123	-1.50195	0.490275	3.06349	0.00218775	0.0281005
WBGene00003444	9029	msp-51	778.318	-1.50019	0.257782	5.81962	5.89817e-09	3.36417e-07
WBGene00003429	3055	msp-31	864.675	-1.4991	0.262093	5.71973	1.06692e-08	5.8655e-07
WBGene00017853	4841	F27C1.3	30.947	-1.4987	0.712091	2.10465	0.0353221	0.207365
WBGene00007565	7618	clec-48	913.432	-1.49299	0.186802	7.99238	1.32354e-15	1.67759e-13
WBGene00015820	22198	C16A11.7	75.9352	-1.49271	0.345609	4.31906	1.56695e-05	0.000428144
WBGene00008231	22576	tag-329	8.8882	-1.49123	1.29022	1.1558	0.247764	0.628148
WBGene00017114	17207	E03H12.7	66.8223	-1.49056	0.366247	4.06981	4.70522e-05	0.0011405
WBGene00004728	8063	sax-2	9492.31	-1.4903	0.314065	4.7452	2.08303e-06	7.14653e-05
WBGene00020587	20602	ugt-9	639.666	-1.48851	0.141696	10.505	8.19341e-26	2.53468e-23
WBGene00012250	15158	W04E12.5	17.4512	-1.48849	0.827491	1.79879	0.0720512	0.322444
WBGene00044479	18313	F15E6.10	8.03869	-1.48576	1.78766	0.83112	0.405906	0.776989
WBGene00197363	22409	W02F12.11	1.9651	-1.48247	1.95358	0.758849	0.447943	NA
WBGene00008623	22585	spe-43	7.02841	-1.48191	1.42333	1.04116	0.297802	0.68131
WBGene00006050	5080	ssq-1	1203.43	-1.48038	0.205526	7.20287	5.89584e-13	5.35378e-11
WBGene00001477	1039	fmo-2	399.627	-1.47991	0.432878	3.41877	0.000629048	0.0102512
WBGene00020533	11829	T16A1.2	19.957	-1.47887	0.73119	2.02255	0.0431191	0.236056
WBGene00008565	4640	acox-1.2	689.76	-1.47849	0.218754	6.75867	1.39266e-11	1.13986e-09
WBGene00044011	3939	T06E4.12	54.1697	-1.47758	0.538432	2.74422	0.00606543	0.0608276
WBGene00011854	4223	T20B3.14	10.9073	-1.47743	0.870462	1.69729	0.089642	0.369083
WBGene00012102	9703	T27F6.1	19.9104	-1.4774	0.712802	2.07267	0.0382031	0.218037
WBGene00008303	17070	C54D10.9	15.2176	-1.47604	0.836909	1.76368	0.0777862	0.339491
WBGene00018121	15250	F36H12.5	66.7925	-1.47601	0.469567	3.14334	0.00167031	0.0224661
WBGene00013037	269	Y49E10.18	696.896	-1.47112	0.141019	10.4321	1.76927e-25	5.2939e-23
WBGene00206512	21942	Y39A3B.7	1.17305	-1.46984	3.17206	0.46337	0.643099	NA
WBGene00010854	7685	M04C7.3	2.39578	-1.46869	2.13819	0.686885	0.492155	0.82814
WBGene00022715	17292	irld-65	1.41841	-1.46851	3.00254	0.489088	0.624779	NA
WBGene00008911	23339	F17C8.6	1.15006	-1.46767	2.90933	0.504471	0.613931	NA
WBGene00018141	27806	oac-21	1.86314	-1.46674	2.8139	0.521246	0.602196	NA
WBGene00019951	21738	R08C7.8	20.6986	-1.46654	0.859537	1.7062	0.087971	0.365086
WBGene00022753	22342	ZK484.7	53.4029	-1.46623	0.508383	2.88411	0.00392523	0.0441773
WBGene00019150	12280	H04J21.1	32.941	-1.4658	0.610225	2.40207	0.0163025	0.123981
WBGene00206527	9971	T27A8.7	1.87427	-1.4637	2.55981	0.5718	0.567457	NA
WBGene00013879	22165	ZC376.8	35.3614	-1.46225	0.745031	1.96267	0.049685	0.258356
WBGene00236785	17452	Y73B6A.16	2.07506	-1.46217	2.45491	0.59561	0.551436	NA
WBGene00015573	16659	C07G1.7	3.76913	-1.46106	2.38706	0.612077	0.540487	0.85574
WBGene00003466	10524	msp-79	407.644	-1.46081	0.317851	4.59589	4.30909e-06	0.000138224
WBGene00008250	17065	srsx-29	2.6551	-1.46063	2.36185	0.618426	0.536295	0.853007
WBGene00012159	6224	VY10G11R.1	3.9229	-1.45707	1.54242	0.944665	0.34483	0.728791
WBGene00014665	14686	C04G2.3	98.6083	-1.45587	0.451773	3.22258	0.00127044	0.0181582
WBGene00000712	12487	col-139	27216.7	-1.45553	0.138952	10.4751	1.12458e-25	3.42096e-23
WBGene00168884	22869	21ur-11141	1.112	-1.45264	2.83397	0.512581	0.608244	NA
WBGene00219295	7970	C34C12.12	16.1689	-1.44964	0.964342	1.50324	0.132777	0.462223
WBGene00013810	7235	Y116A8C.37	4.05077	-1.44864	1.88076	0.770242	0.441156	0.796466
WBGene00008597	8628	clec-55	14.5065	-1.4481	0.937843	1.54407	0.122571	0.442566
WBGene00017172	14721	F02C9.1	3.35669	-1.44643	1.82095	0.794326	0.427006	0.788519
WBGene00007472	16031	chil-7	24.2149	-1.44617	0.742698	1.94718	0.0515128	0.263882
WBGene00016761	13750	tkr-2	10.0169	-1.44503	0.808634	1.78701	0.0739364	0.328003
WBGene00014976	22177	Y116A8C.7	3.43998	-1.44335	1.74677	0.826295	0.408637	0.778626
WBGene00020439	17766	T12A2.5	6.00139	-1.4433	1.74588	0.826692	0.408412	0.778626
WBGene00010933	16595	M162.7	80.567	-1.44223	0.383202	3.76363	0.000167464	0.00335359
WBGene00003463	8036	msp-76	880.096	-1.44185	0.207451	6.95034	3.64417e-12	3.13742e-10
WBGene00016054	10729	C24D10.2	89.6745	-1.44114	0.390083	3.69446	0.000220355	0.00424702
WBGene00010176	22081	F56H11.6	1.17025	-1.4409	2.78834	0.516759	0.605324	NA
WBGene00015992	4301	C18H2.5	51.583	-1.44077	0.490294	2.93859	0.00329714	0.0385896
WBGene00194917	15403	Y45F10B.59	1.12709	-1.43885	2.65723	0.541482	0.588175	NA
WBGene00021198	1913	npp-26	27.9522	-1.43823	0.56586	2.54167	0.0110325	0.0931385
WBGene00012278	12166	W05B10.3	11.711	-1.43817	0.89805	1.60143	0.109281	0.415456
WBGene00006623	3108	try-5	38.144	-1.43734	0.664841	2.16193	0.0306236	0.189279
WBGene00017794	4838	mltn-13	25.5025	-1.43729	0.659118	2.18063	0.0292108	0.184141
WBGene00017955	19724	F31E8.5	124.748	-1.43723	0.327644	4.38655	1.15165e-05	0.000329982
WBGene00000657	12987	col-81	18941.1	-1.43621	0.154432	9.29998	1.40474e-20	2.91355e-18
WBGene00006509	14061	tag-164	99.0804	-1.43534	0.331552	4.32916	1.49677e-05	0.000412051
WBGene00011796	13154	T16G1.2	27.7919	-1.43188	0.542498	2.63942	0.00830471	0.0759026
WBGene00001841	21980	hen-1	52.0232	-1.43123	0.565309	2.53176	0.0113492	0.095152
WBGene00021483	20613	Y40A1A.1	3.02963	-1.43009	2.44686	0.584458	0.558912	0.865803
WBGene00169851	17868	21ur-14454	2.5343	-1.42981	2.26486	0.631302	0.527843	0.847931
WBGene00003450	11024	msp-57	650.42	-1.42921	0.22092	6.46934	9.84343e-11	7.24445e-09
WBGene00012357	22123	W09D6.4	88.565	-1.42641	0.485424	2.93848	0.00329825	0.0385896
WBGene00018498	9827	F46F5.7	9.93467	-1.42471	1.0133	1.406	0.159723	0.508683
WBGene00015689	19198	spch-2	106.709	-1.42389	0.377958	3.76732	0.000165009	0.00332056
WBGene00201896	20902	Y67D2.9	1.42117	-1.42155	2.79618	0.508391	0.611179	NA
WBGene00011257	7694	npax-3	9.75674	-1.42073	0.997836	1.42381	0.154502	0.500181
WBGene00007714	21053	C25D7.1	82.5903	-1.42027	0.505483	2.80974	0.00495817	0.0527062
WBGene00012609	10678	Y38F1A.7	11.8387	-1.41996	1.04873	1.35398	0.175743	0.532072
WBGene00012249	22637	W04E12.4	16.5935	-1.41992	1.19187	1.19134	0.23352	0.61037
WBGene00015084	781	B0244.9	31.6689	-1.41974	0.621871	2.28301	0.0224297	0.153558
WBGene00003449	6068	msp-56	409.852	-1.41972	0.197967	7.17152	7.41683e-13	6.63588e-11
WBGene00015094	22182	B0261.6	173.765	-1.41958	0.305601	4.6452	3.3974e-06	0.000111327
WBGene00050919	5954	C45G9.15	11.2144	-1.41782	1.08443	1.30743	0.191067	0.55276
WBGene00021916	19784	Y55D5A.2	2.08825	-1.41773	2.21688	0.639517	0.522486	NA
WBGene00077516	33391	C50C3.13	0.232237	-1.41745	6.03152	0.235008	0.814203	NA
WBGene00006258	11570	str-227	14.7876	-1.41661	0.882049	1.60604	0.108265	0.413488
WBGene00014863	10234	Y11D7A.16	3.01611	-1.41588	2.18393	0.64832	0.516778	0.842567
WBGene00219740	19935	linc-117	2.77297	-1.41585	2.31162	0.612491	0.540213	0.855603
WBGene00206470	46416	F13E9.20	1.83373	-1.41582	2.35553	0.601064	0.547797	NA
WBGene00000629	12482	col-52	4.80973	-1.41577	1.7244	0.821024	0.411633	0.780514
WBGene00011403	13146	T03F7.6	2.36734	-1.41568	1.92266	0.736312	0.461541	NA
WBGene00043059	17822	srab-26	2.01143	-1.41563	2.61786	0.540757	0.588675	NA
WBGene00005207	14045	srg-50	1.64009	-1.41562	2.627	0.538872	0.589975	NA
WBGene00010604	21596	nhr-199	5.8189	-1.41559	1.53475	0.922359	0.356341	0.73822
WBGene00077523	17860	C23H5.12	1.57685	-1.41553	2.72996	0.518517	0.604098	NA
WBGene00011341	13664	T01G5.6	1.27817	-1.41529	3.00264	0.471348	0.637392	NA
WBGene00018652	12268	F49F1.12	6.87868	-1.41474	1.69338	0.835453	0.403463	0.774896
WBGene00047726	12386	21ur-4428	3.91672	-1.41469	1.68722	0.838478	0.401762	0.77352
[truncated: 44,621 more rows]

## Sheet: Up-regulated genes
Table S3. Genes up-regulated in sgk-1(lf) compared to wild type without CS.
gene_id	entrezid	symbol	baseMean	log2FoldChange	lfcSE	stat	pvalue	padj
WBGene00044212	440	Y68A4A.13	194.45	11.7729	1.48405	-7.93293	2.14034e-15	2.63957e-13
WBGene00007659	17557	pals-5	79.6216	11.1305	1.48626	-7.4889	6.94507e-14	7.45655e-12
WBGene00012091	18650	pals-29	39.1561	9.81704	1.56552	-6.27079	3.59221e-10	2.47415e-08
WBGene00015225	5273	B0507.8	483.38	8.49019	0.484061	-17.5395	7.15347e-69	1.30565e-65
WBGene00013648	2780	Y105C5B.7	32.2563	8.45914	1.60706	-5.26372	1.41167e-07	6.0483e-06
WBGene00086560	8437	ZK355.8	13.0006	8.09416	1.7171	-4.71384	2.43086e-06	8.27763e-05
WBGene00010928	224	clec-258	126.222	8.08563	1.48051	-5.46139	4.72428e-08	2.26915e-06
WBGene00013646	19662	Y105C5B.3	107.251	7.88749	0.775843	-10.1663	2.8023e-24	8.11867e-22
WBGene00008477	147	clec-17	17.7092	7.83654	1.6651	-4.70635	2.5219e-06	8.55572e-05
WBGene00009706	189	argk-1	3483.24	7.74331	0.412013	-18.7938	8.48153e-79	2.2115e-75
WBGene00009061	16570	pals-14	280.247	7.65682	0.496779	-15.4129	1.33956e-53	1.74641e-50
WBGene00044708	24087	pals-11	8.30506	7.65568	1.95265	-3.92066	8.83083e-05	0.00197767
WBGene00021587	10845	clec-76	14.0631	7.35799	1.61587	-4.55357	5.27433e-06	0.000164278
WBGene00077629	12892	K10G4.13	6.92781	7.26053	1.90297	-3.81538	0.000135975	0.00282668
WBGene00005616	1591	srj-29	17.7337	7.1937	1.851	-3.88639	0.000101748	0.00222141
WBGene00008302	9629	pals-38	61.4862	6.99722	0.845473	-8.2761	1.27277e-16	1.75989e-14
WBGene00008507	23321	F01G10.4	5.21227	6.84781	2.0436	-3.35086	0.000805606	0.0125033
WBGene00021805	415	Y53G8AM.5	777.482	6.82033	0.815001	-8.3685	5.83583e-17	8.45362e-15
WBGene00235332	492	K04A8.20	61.7571	6.80102	1.12273	-6.05757	1.3819e-09	8.63785e-08
WBGene00021517	9882	Y41D4B.15	48.3943	6.72394	1.53603	-4.37748	1.20059e-05	0.000340797
WBGene00022438	430	Y110A2AL.1	16.7479	6.72215	1.54877	-4.34031	1.42281e-05	0.000393472
WBGene00022550	2442	droe-8	30.3957	6.70126	1.11033	-6.03537	1.58595e-09	9.71368e-08
WBGene00013846	23571	ZC84.1	15.8943	6.66729	1.60273	-4.15996	3.18302e-05	0.000804659
WBGene00007655	23295	C17H1.2	3.4	6.66295	5.95177	-1.11949	0.262931	0.64244
WBGene00017214	7301	F07E5.9	24.0483	6.59282	1.30245	-5.06187	4.15165e-07	1.65715e-05
WBGene00021580	411	clec-174	9.68145	6.5288	1.86549	-3.49978	0.000465636	0.00799509
WBGene00008067	16555	C43D7.4	3.28376	6.46205	5.9523	-1.08564	0.277638	0.659139
WBGene00045401	18330	eol-1	215.563	6.37093	0.424307	-15.0149	5.86483e-51	6.29676e-48
WBGene00050906	24427	F20E11.17	3.95803	6.14052	2.24458	-2.73572	0.00622449	0.0618114
WBGene00005703	619	sru-40	5.12326	6.11493	2.42022	-2.5266	0.0115172	0.096169
WBGene00007656	11085	pals-2	14.5417	6.05514	1.54756	-3.91271	9.12655e-05	0.00203144
WBGene00015227	2284	ddn-1	588.411	6.03342	0.270581	-22.298	3.86271e-110	2.35007e-106
WBGene00008267	22048	C53A5.9	28.0054	5.98255	0.890218	-6.72032	1.81332e-11	1.47753e-09
WBGene00006643	2617	tsp-17	37.4934	5.9785	1.4344	-4.16796	3.07343e-05	0.000782374
WBGene00005582	10065	sri-70	4.38863	5.92259	1.9093	-3.10196	0.00192244	0.0251709
WBGene00021081	2907	pals-33	180.909	5.89882	0.531547	-11.0975	1.29054e-28	4.80714e-26
WBGene00005188	19011	srg-31	5.23936	5.89562	2.79238	-2.11132	0.0347444	0.205494
WBGene00008301	3635	pals-39	161.04	5.88784	0.639549	-9.20624	3.37735e-20	6.70036e-18
WBGene00009077	6639	F23B2.10	27.3784	5.79436	1.98571	-2.91803	0.00352247	0.0406447
WBGene00044787	17844	pals-36	7.64965	5.65827	1.67848	-3.37106	0.000748784	0.0117513
WBGene00219369	22935	R160.10	11.1644	5.621	1.70726	-3.29241	0.00099333	0.0148731
WBGene00011266	14139	R13H4.8	10.4169	5.60031	1.73151	-3.23434	0.00121922	0.0175776
WBGene00194645	17354	Y105C5A.1269	1.69728	5.59712	4.53451	-1.23434	0.217078	NA
WBGene00197882	11937	F12F3.5	5.05447	5.56914	1.95822	-2.84399	0.0044553	0.0486353
WBGene00019933	12303	R07C12.3	3.80226	5.55059	1.93962	-2.86169	0.00421386	0.0466889
WBGene00009462	18088	sre-22	4.34646	5.49133	2.06514	-2.65907	0.00783574	0.0727656
WBGene00235307	18955	B0507.17	2.03798	5.48623	2.92664	-1.87459	0.0608497	NA
WBGene00012708	17142	sre-19	9.04934	5.48551	1.96381	-2.7933	0.00521727	0.0546645
WBGene00022796	19799	ZK688.1	10.3622	5.47982	1.82931	-2.99557	0.0027393	0.0333097
WBGene00015834	23708	math-5	1.45725	5.47411	5.70239	-0.959968	0.337071	NA
WBGene00021524	18271	Y41D4B.24	12.8396	5.47022	1.64332	-3.32875	0.000872357	0.01338
WBGene00235133	491	T26H5.14	83.6821	5.44874	0.604782	-9.00942	2.07153e-19	3.78097e-17
WBGene00016669	10746	ilys-2	3.05602	5.37239	2.96185	-1.81386	0.0696987	0.316453
WBGene00086553	3472	ZC334.13	2.88291	5.36594	3.00225	-1.78731	0.0738877	0.328003
WBGene00012910	18133	Y46G5A.20	548.158	5.35916	0.367974	-14.5639	4.76264e-48	4.57514e-45
WBGene00021804	12842	Y53G8AM.4	2.89573	5.35913	2.5827	-2.07501	0.0379857	0.21734
WBGene00015221	23683	B0507.4	3.69857	5.34599	2.16968	-2.46395	0.0137415	0.10938
WBGene00007872	11093	C32H11.9	10.1007	5.33379	1.85967	-2.86814	0.00412889	0.0460357
WBGene00020584	15286	T19D12.10	5.07746	5.33325	2.44774	-2.17884	0.0293434	0.184873
WBGene00007661	23296	pals-7	3.51197	5.32401	2.1177	-2.51405	0.0119353	0.0983045
WBGene00007660	2635	pals-6	171.377	5.26545	0.34643	-15.1992	3.58167e-52	4.35817e-49
WBGene00019625	11300	K10C9.4	2.62623	5.22004	2.76404	-1.88856	0.0589511	0.285329
WBGene00011557	18115	ostf-4	7.35919	5.21028	1.90056	-2.74144	0.00611697	0.0611094
WBGene00017334	6801	F10D2.8	12.0691	5.20417	1.95987	-2.65536	0.00792234	0.0733259
WBGene00012727	265	Y39G8B.7	67.5214	5.20344	0.90008	-5.78109	7.42199e-09	4.14269e-07
WBGene00010235	22082	F58B4.2	5.08452	5.19099	1.97495	-2.62842	0.00857826	0.0778087
WBGene00022713	18293	ZK355.3	5.82533	5.19097	1.92	-2.70363	0.00685863	0.0666694
WBGene00007151	6123	B0365.2	7.52598	5.18435	1.9424	-2.66904	0.00760675	0.0714557
WBGene00015401	7774	srsx-24	2.72044	5.17038	2.13163	-2.42555	0.0152852	0.118566
WBGene00195165	13903	F57G4.11	26.0665	5.12074	1.8295	-2.79899	0.00512631	0.0539904
WBGene00018248	21182	F40G9.14	4.86296	5.09677	1.85824	-2.7428	0.00609179	0.0609613
WBGene00138721	12896	pals-37	49.3651	5.08384	0.875084	-5.80955	6.26422e-09	3.56182e-07
WBGene00044237	22841	pals-9	42.243	5.05708	0.786354	-6.43105	1.26729e-10	9.1065e-09
WBGene00008524	5631	F02D10.3	4.25276	5.03323	2.2196	-2.26763	0.0233519	0.157907
WBGene00014184	23584	ZK1025.4	3.46244	5.03319	2.19999	-2.28782	0.0221477	0.152601
WBGene00198103	19402	C56E10.5	2.59764	5.03296	2.11719	-2.37719	0.0174451	0.129645
WBGene00018824	23825	F54E2.2	1.41095	5.02618	5.86278	-0.857304	0.391277	NA
WBGene00020637	23887	fbxa-7	2.39895	5.02585	2.6547	-1.89319	0.0583326	0.283463
WBGene00021267	23913	Y23B4A.1	3.28424	5.02141	1.97077	-2.54794	0.0108361	0.0921198
WBGene00044090	24046	srbc-33	2.50536	5.01778	2.52058	-1.99072	0.0465112	0.247139
WBGene00009725	12115	F45E6.1	2.672	5.01778	2.41902	-2.0743	0.0380514	0.217539
WBGene00017183	15715	scl-15	2.78824	5.01776	2.23583	-2.24425	0.0248165	0.16525
WBGene00004107	12531	pqn-16	3.60993	5.00986	2.35356	-2.12863	0.0332852	0.200304
WBGene00004402	18010	rom-3	4.87858	5.00253	2.07512	-2.41072	0.015921	0.122148
WBGene00044663	9418	F26G1.10	9.17539	4.9989	1.4266	-3.50407	0.000458205	0.0078779
WBGene00007864	129	irg-6	8.3544	4.95887	1.84665	-2.68534	0.00724561	0.0692755
WBGene00219294	1987	F43G6.16	2.96329	4.9432	2.26031	-2.18696	0.0287456	0.182112
WBGene00013636	23565	Y105C5A.12	4.0532	4.93378	1.85077	-2.6658	0.00768057	0.0717797
WBGene00022809	1446	ZK697.14	6.35733	4.88938	1.7874	-2.73547	0.00622913	0.0618239
WBGene00194902	2474	Y39H10B.3	26.7882	4.88578	1.09225	-4.47312	7.70864e-06	0.000231411
WBGene00015602	4293	fbxa-158	26.5537	4.88514	1.04644	-4.66836	3.03608e-06	0.000100389
WBGene00018345	13776	F42C5.3	104.951	4.86918	0.379811	-12.82	1.26689e-37	7.00706e-35
WBGene00044117	16758	srsx-10	2.5254	4.85848	5.96048	-0.815116	0.415006	0.783378
WBGene00018110	21178	F36H9.1	1.35033	4.84865	3.64078	-1.33176	0.182938	NA
WBGene00002104	22975	ins-21	2.98071	4.84764	2.50623	-1.93423	0.0530844	0.268318
WBGene00006097	18540	str-31	8.06112	4.84421	1.83341	-2.64218	0.00823734	0.075438
WBGene00020578	18256	T19D12.3	5.72212	4.84393	1.81208	-2.67314	0.00751458	0.0707355
WBGene00195240	11922	Y39B6A.69	1.50133	4.83931	3.68576	-1.31297	0.189192	NA
WBGene00189993	25006	C49C3.21	5.02961	4.83781	2.07572	-2.33067	0.019771	0.141126
WBGene00000631	22469	col-54	26.6915	4.83572	1.75038	-2.76267	0.00573313	0.058565
WBGene00020041	14291	R13A1.1	1.41403	4.82989	3.69878	-1.30581	0.191619	NA
WBGene00005614	9582	srj-26	4.80053	4.82071	2.2393	-2.15278	0.0313362	0.192348
WBGene00012413	13683	Y7A5A.7	2.12987	4.82043	3.34578	-1.44075	0.149655	NA
WBGene00050870	18341	21ur-4922	2.16285	4.81608	2.45468	-1.962	0.0497628	NA
WBGene00005609	16516	srj-21	3.54959	4.79363	2.34206	-2.04676	0.040682	0.226796
WBGene00008988	164	F20G2.5	151.386	4.79229	0.564369	-8.49142	2.0413e-17	3.07915e-15
WBGene00013294	17643	pals-30	31.1186	4.76613	0.878182	-5.42727	5.72211e-08	2.68064e-06
WBGene00006086	5081	str-19	1.96428	4.74505	2.67469	-1.77405	0.0760544	NA
WBGene00020979	16143	fbxb-55	3.82993	4.72896	1.94501	-2.43133	0.0150436	0.117492
WBGene00077696	22862	2025-03-01	10.8304	4.7198	1.70969	-2.76062	0.00576911	0.0587811
WBGene00017678	4334	asp-12	1616.64	4.71801	0.22983	-20.5282	1.20472e-93	4.39771e-90
WBGene00005179	19521	srg-22	1.11739	4.71049	4.50128	-1.04648	0.295341	NA
WBGene00021179	18266	fbxa-86	5.1343	4.7097	4.2048	-1.12008	0.262681	0.641914
WBGene00170354	8931	21ur-14926	2.02017	4.70578	2.81639	-1.67086	0.0947503	NA
WBGene00195884	15903	C17E4.14	1.76557	4.70163	2.25847	-2.08177	0.0373631	NA
WBGene00007131	9091	pals-26	307.317	4.6855	0.392673	-11.9323	8.03242e-33	3.49066e-30
WBGene00015958	23712	srbc-11	1.03685	4.63604	5.96251	-0.777532	0.436845	NA
WBGene00005326	23062	srh-107	1.27765	4.63583	4.65755	-0.995335	0.319573	NA
WBGene00022476	23950	fbxa-75	1.79527	4.63569	4.20598	-1.10217	0.270389	NA
WBGene00005957	23214	srx-66	1.75705	4.63517	3.32815	-1.39272	0.163706	NA
WBGene00044239	21250	C33D9.10	2.2939	4.63463	2.87934	-1.60961	0.107482	NA
WBGene00022544	21774	ZC190.10	11.5038	4.63408	1.80529	-2.56695	0.0102598	0.0890453
WBGene00014043	12197	clec-58	2.25631	4.63404	2.59299	-1.78714	0.0739142	NA
WBGene00015175	14691	srz-4	4.48481	4.63185	2.10525	-2.20014	0.027797	0.178205
WBGene00044416	28330	C08E3.15	0.937826	4.625	5.62071	-0.82285	0.410593	NA
WBGene00018946	355	F56C3.9	1077.89	4.62436	0.254429	-18.1755	8.07123e-74	1.84145e-70
WBGene00010718	21597	K09C8.8	2.39307	4.613	2.38361	-1.9353	0.0529532	0.267969
WBGene00005206	18018	srg-49	4.15128	4.61191	1.95045	-2.36453	0.018053	0.132468
WBGene00018945	12787	F56C3.8	3.9366	4.61183	1.9339	-2.38473	0.0170919	0.127748
WBGene00000736	9990	col-163	6.15476	4.61174	1.91585	-2.40715	0.0160774	0.122934
WBGene00004223	11550	ptr-9	3.47126	4.61159	1.88857	-2.44184	0.0146126	0.115159
WBGene00022689	11364	math-48	5.76144	4.61063	1.76343	-2.61459	0.00893352	0.0802829
WBGene00000705	7500	col-131	13.6858	4.61037	1.7394	-2.65056	0.00803596	0.0741893
WBGene00045393	2964	F26D11.13	11.1067	4.60799	1.32598	-3.47516	0.000510544	0.00863158
WBGene00010206	17106	F57G4.1	5.44764	4.60339	4.74366	-0.970432	0.331831	0.71701
WBGene00006183	10069	str-135	5.15462	4.60264	1.92442	-2.3917	0.0167705	0.126225
WBGene00009229	21569	F28G4.4	6.00538	4.59391	1.8401	-2.49656	0.0125406	0.102138
WBGene00010968	17608	R01E6.2	6.40734	4.59362	1.89149	-2.42857	0.0151586	0.118023
WBGene00019570	10800	K09E2.1	2.64526	4.59218	2.57649	-1.78234	0.0746936	0.330099
WBGene00020227	23875	T05A8.1	1.43643	4.59183	3.22005	-1.42601	0.153865	NA
WBGene00000108	13477	alh-2	1.55033	4.59165	3.94315	-1.16446	0.244236	NA
WBGene00005140	17021	srd-63	3.55112	4.58314	2.0813	-2.20206	0.0276613	0.177773
WBGene00018544	13263	nhr-188	2.1235	4.58212	2.33306	-1.964	0.0495307	NA
WBGene00009108	4656	F25D1.3	2.35121	4.56973	3.23889	-1.41089	0.158276	NA
WBGene00012023	20528	clec-34	1.52317	4.56902	4.36349	-1.0471	0.295053	NA
WBGene00009047	165	F22B8.4	218.39	4.54515	0.362148	-12.5505	3.94786e-36	1.8476e-33
WBGene00007132	3122	pals-27	75.0912	4.52668	0.624719	-7.24596	4.29392e-13	4.06076e-11
WBGene00044024	18303	C35A5.11	14.6346	4.52481	1.45451	-3.11088	0.00186534	0.024582
WBGene00021865	17789	fbxa-66	29.9245	4.51721	0.91243	-4.95075	7.39288e-07	2.78791e-05
WBGene00009875	16584	F49C12.5	2.06297	4.49764	3.03632	-1.48128	0.138532	NA
WBGene00009395	6651	clec-64	11.9046	4.48664	1.30649	-3.43412	0.00059449	0.00974025
WBGene00019376	367	lipl-4	57.3697	4.46699	0.582985	-7.66228	1.8266e-14	2.07076e-12
WBGene00202250	9459	R13A1.17	3.48513	4.4594	1.98294	-2.24888	0.0245199	0.163753
WBGene00015473	14209	C05D9.4	2.31524	4.45846	2.13701	-2.08631	0.0369505	NA
WBGene00009041	4163	cut-3	46.9247	4.44795	1.07551	-4.13567	3.53916e-05	0.000885941
WBGene00016302	3788	fbxc-7	12.5882	4.43033	1.33501	-3.31857	0.000904796	0.0138311
WBGene00044086	13340	clec-228	1.35272	4.37236	3.91177	-1.11775	0.263676	NA
WBGene00044044	17825	C08B6.14	1.63193	4.37235	3.88794	-1.12459	0.260762	NA
WBGene00044042	11868	Y46G5A.37	2.64638	4.37202	3.4491	-1.26758	0.204947	0.571971
WBGene00199283	4972	F32A11.9	1.54221	4.37196	3.3952	-1.28769	0.197854	NA
WBGene00021390	27919	fbxa-214	2.02035	4.37155	3.06001	-1.4286	0.153118	NA
WBGene00013421	7224	fbxa-220	4.5842	4.36914	2.26575	-1.92834	0.0538128	0.270285
WBGene00005620	6109	srj-35	4.30879	4.36874	2.20276	-1.9833	0.0473341	0.249983
WBGene00017412	27783	F13A2.3	2.06919	4.35811	2.51401	-1.73352	0.0830025	NA
WBGene00005816	23179	srw-69	4.23077	4.35769	2.35072	-1.85377	0.0637726	0.299917
WBGene00236809	17954	ZK993.5	2.79397	4.35717	2.20726	-1.97402	0.0483798	0.253282
WBGene00014956	7763	Y102A5C.11	4.85052	4.35544	1.93608	-2.24962	0.0244731	0.16356
WBGene00012959	9224	Y47H10A.3	22.0737	4.35516	1.00179	-4.3474	1.37759e-05	0.000383875
WBGene00016692	21159	srbc-24	2.26824	4.34609	2.96012	-1.46821	0.142047	NA
WBGene00005868	19997	srw-121	2.40253	4.34596	2.67924	-1.62209	0.104785	0.405053
WBGene00011135	23459	fbxa-147	2.46411	4.34553	2.21893	-1.95839	0.0501847	0.259556
WBGene00005941	23209	srx-50	2.58727	4.3453	2.08721	-2.08187	0.0373543	0.2144
WBGene00014067	14680	ZK675.4	4.52267	4.34494	1.9527	-2.22509	0.0260755	0.171153
WBGene00010717	22616	K09C8.7	17.8049	4.34234	1.61912	-2.6819	0.00732044	0.0695899
WBGene00015338	10716	catp-2	3263.15	4.33632	1.61624	-2.68297	0.00729719	0.0695557
WBGene00016198	4802	C28H8.7	3.71939	4.3342	1.96889	-2.20134	0.0277118	0.177909
WBGene00005468	18533	srh-262	2.76967	4.33362	2.35508	-1.84012	0.065751	0.305031
WBGene00005199	13042	srg-42	2.14808	4.33341	2.66547	-1.62576	0.104001	NA
WBGene00001506	24	fut-2	256.55	4.32609	0.691592	-6.25526	3.96857e-10	2.69273e-08
WBGene00009251	10618	F29D10.2	4.06868	4.32293	2.02707	-2.1326	0.0329576	0.198791
WBGene00019228	22268	H23L24.1	4.45762	4.32288	2.03341	-2.12592	0.0335095	0.201256
WBGene00044181	13860	F09C6.11	2.21981	4.32209	2.18111	-1.9816	0.047524	NA
WBGene00044718	13868	T20D4.20	3.38644	4.32113	2.4853	-1.73868	0.0820919	0.350703
WBGene00011539	6694	fbxa-135	25.1759	4.32017	0.7562	-5.713	1.11e-08	6.08399e-07
WBGene00200009	44998	C29H12.10	1.18777	4.32005	3.39154	-1.27377	0.202745	NA
WBGene00016693	11756	srbc-20	8.22076	4.31401	1.8765	-2.29897	0.0215065	0.149667
WBGene00012069	252	T26H5.4	20.9641	4.3133	1.16503	-3.70232	0.000213634	0.00415697
WBGene00009791	9149	F46F3.3	11.6738	4.31251	1.96707	-2.19235	0.0283543	0.180561
WBGene00019091	10314	srab-13	1.09935	4.30573	5.662	-0.76046	0.44698	NA
WBGene00013525	20068	irld-59	0.654212	4.30567	5.96616	-0.721682	0.47049	NA
WBGene00196055	19879	T07D1.8	0.604691	4.30567	5.96616	-0.721682	0.47049	NA
WBGene00045412	456	C25F9.12	25.7697	4.2712	1.17923	-3.62203	0.000292298	0.00538891
WBGene00018645	1356	F49F1.5	38.4419	4.24881	0.873868	-4.86207	1.16164e-06	4.18189e-05
WBGene00200939	15937	F10F2.15	1.34834	4.22019	3.82163	-1.10429	0.269468	NA
WBGene00019788	15775	M116.1	2.22567	4.21858	2.70308	-1.56066	0.118605	NA
WBGene00013283	23548	sre-25	1.37482	4.21333	4.55203	-0.925593	0.354657	NA
WBGene00010103	22607	F55C9.6	1.67356	4.21251	3.1687	-1.32941	0.183712	NA
WBGene00195004	6464	K08D12.8	5.87616	4.20723	1.91396	-2.19818	0.0279364	0.178848
WBGene00010473	213	hrg-2	2246.41	4.19815	0.249937	-16.7968	2.57402e-63	3.91508e-60
WBGene00008180	19066	C48D5.3	3.24627	4.18468	1.95293	-2.14277	0.0321313	0.195526
WBGene00013277	17642	sre-41	1.1757	4.17706	2.98561	-1.39906	0.161795	NA
WBGene00048387	20194	21ur-738	0.61484	4.16891	5.96794	-0.698552	0.484832	NA
WBGene00016798	15235	ets-8	4.2482	4.1634	2.64939	-1.57145	0.116077	0.431408
WBGene00021023	7882	W04B5.6	1.23788	4.15464	3.70464	-1.12147	0.262088	NA
WBGene00219331	26415	H25K10.141	3.14459	4.10844	2.15544	-1.90608	0.0566394	0.278048
WBGene00013900	282	ugt-18	340.13	4.06529	0.563856	-7.20981	5.60319e-13	5.13917e-11
WBGene00010257	12617	F58E6.8	53.7602	4.05551	0.698241	-5.80819	6.31531e-09	3.57972e-07
WBGene00011547	23477	T06G6.5	0.632752	4.05092	5.96961	-0.67859	0.497398	NA
WBGene00045045	20167	Y45F10B.17	0.611822	4.05092	5.96961	-0.67859	0.497398	NA
WBGene00005738	22527	srv-27	0.762242	4.05092	5.96961	-0.67859	0.497398	NA
WBGene00173298	24905	21ur-13032	0.690403	4.05092	5.96961	-0.67859	0.497398	NA
WBGene00006181	23258	str-133	1.18758	4.0508	5.37315	-0.753897	0.450911	NA
WBGene00198620	8463	F11C7.9	1.0699	4.05069	4.94999	-0.818322	0.413173	NA
WBGene00022658	23962	srh-188	1.44902	4.05023	3.97553	-1.01879	0.308302	NA
WBGene00197119	43352	F36D4.9	0.982817	4.05008	3.78441	-1.0702	0.284528	NA
WBGene00005097	23016	srd-19	1.86205	4.04949	3.24642	-1.24737	0.212262	NA
WBGene00206365	17431	B0563.18	1.61973	4.049	2.97298	-1.36193	0.173219	NA
WBGene00008853	22059	clec-101	1.73459	4.04848	2.75703	-1.46842	0.14199	NA
WBGene00196059	15411	D2023.12	1.6607	4.04797	2.60066	-1.55651	0.119586	NA
WBGene00008043	135	C40H1.8	489.923	4.04609	0.337586	-11.9854	4.23896e-33	1.88706e-30
WBGene00196960	43268	R13F6.11	0.880237	4.04233	4.29654	-0.940834	0.34679	NA
WBGene00007770	16032	nhr-259	0.763957	4.04233	4.28922	-0.942439	0.345968	NA
WBGene00005997	26822	srx-106	0.600334	4.03443	5.96986	-0.675801	0.499167	NA
WBGene00046272	17849	21ur-4915	1.07051	4.03392	3.59119	-1.12328	0.261317	NA
WBGene00005446	23102	srh-239	1.27909	4.03362	3.14306	-1.28334	0.199373	NA
WBGene00001545	16991	gcy-20	3.39436	4.03311	2.71273	-1.48674	0.137084	0.471114
WBGene00005482	4587	srh-277	2.14732	4.0323	2.34842	-1.71703	0.0859739	NA
WBGene00045104	6448	C04G2.12	2.20452	4.0319	2.23765	-1.80184	0.0715702	NA
WBGene00020242	23880	phat-5	4.48553	4.03051	1.99105	-2.02431	0.0429379	0.235417
WBGene00017061	7298	oac-12	4.83659	4.0297	1.90333	-2.11719	0.0342439	0.203523
WBGene00045416	457	Y37H2A.14	371.329	4.02862	0.417892	-9.64035	5.40019e-22	1.26364e-19
WBGene00015458	14208	C04G6.10	6.25188	4.02832	1.8001	-2.23783	0.0252319	0.166981
WBGene00014931	14688	Y59A8B.t5	4.35831	4.02309	1.81876	-2.21199	0.0269672	0.174735
WBGene00044228	24061	T03F6.7	1.1264	4.01777	3.0097	-1.33494	0.181896	NA
WBGene00012773	22136	srt-48	1.69327	4.01777	2.98291	-1.34693	0.178003	NA
WBGene00014842	7762	clec-30	1.98015	4.01777	3.03315	-1.32462	0.185297	NA
WBGene00014798	23651	K05D4.1	1.88438	4.01774	2.58163	-1.55628	0.119642	NA
WBGene00014371	17165	F40G12.14	1.91965	4.01774	2.52169	-1.59327	0.1111	NA
WBGene00015379	17177	C03B1.9	2.08219	4.01773	2.40251	-1.6723	0.0944644	NA
WBGene00020857	13300	srt-62	2.85893	4.01773	2.41081	-1.66655	0.0956048	0.382839
WBGene00016743	19705	srb-15	2.62751	4.01772	2.37745	-1.68993	0.0910419	0.371246
WBGene00007164	18551	fbxa-139	3.30909	4.01772	2.36943	-1.69565	0.0899524	0.369266
WBGene00009423	19606	F35E8.10	5.06988	4.01166	1.8794	-2.13454	0.0327986	0.198225
WBGene00022249	5425	Y73B6BL.28	5.51844	4.0064	1.82408	-2.1964	0.0280634	0.179284
WBGene00011533	19631	T06E4.5	6.20754	4.00567	1.88466	-2.1254	0.033553	0.201384
WBGene00005420	12546	srh-210	5.46525	4.00355	2.20237	-1.81784	0.0690891	0.314672
WBGene00219761	11465	linc-143	2.09903	4.00321	2.29455	-1.74466	0.0810439	NA
WBGene00045396	14365	ZC334.12	2.57096	4.00303	2.3504	-1.70313	0.0885446	0.366466
WBGene00001916	22973	his-42	1.72363	4.0026	2.52232	-1.58688	0.112541	NA
WBGene00011716	23487	T11F9.19	2.05574	4.00251	2.56875	-1.55815	0.119197	NA
WBGene00010411	212	H25K10.1	206.141	4.00189	0.32593	-12.2784	1.18359e-34	5.40072e-32
WBGene00004997	91	spp-12	1.69037	4.00184	3.06904	-1.30394	0.192255	NA
WBGene00006202	26988	str-156	0.725984	4.00091	5.97036	-0.670128	0.502776	NA
WBGene00022723	16151	ZK380.2	0.489599	4.00091	5.97036	-0.670128	0.502776	NA
WBGene00018291	8810	fip-4	2.46709	3.99572	2.33481	-1.71137	0.0870124	0.362822
WBGene00006399	23276	tag-4	1.11156	3.99294	4.09878	-0.974177	0.329968	NA
WBGene00011396	8193	nhr-271	5.70858	3.99151	2.0071	-1.98869	0.046735	0.247823
WBGene00014979	23674	ZC47.11	5.20967	3.99032	2.10026	-1.89992	0.0574438	0.280338
WBGene00005690	13551	sru-27	3.52216	3.98923	2.21202	-1.80344	0.0713198	0.320793
WBGene00044093	17827	srbc-72	1.99994	3.98772	2.44342	-1.63202	0.102675	NA
WBGene00200154	13433	F37B12.11	2.28452	3.98649	2.76026	-1.44424	0.14867	NA
WBGene00005852	15538	srw-105	1.65705	3.98509	3.51487	-1.13378	0.256888	NA
WBGene00018020	23796	F33H12.6	2.17472	3.98504	3.55105	-1.12222	0.261771	NA
WBGene00199710	21399	F55A12.15	1.18645	3.98501	3.57996	-1.11314	0.265647	NA
WBGene00014319	23597	F09B9.t2	1.71158	3.98478	3.81359	-1.04489	0.296074	NA
WBGene00015550	19683	C06G3.4	1.72564	3.98458	4.07052	-0.978888	0.327635	NA
WBGene00013285	13702	dct-12	1.06128	3.98458	4.07896	-0.976862	0.328638	NA
WBGene00168411	36491	21ur-14134	0.785139	3.98436	4.44379	-0.896613	0.369926	NA
WBGene00008828	23337	F14H3.9	0.574927	3.98386	5.97063	-0.667243	0.504617	NA
WBGene00173566	40997	21ur-7748	0.569325	3.98385	5.97063	-0.667242	0.504617	NA
WBGene00023483	5931	Y75B8A.39	13.9463	3.97184	1.82496	-2.1764	0.0295253	0.185735
WBGene00015932	803	C17H12.6	296.747	3.96204	0.313515	-12.6375	1.31161e-36	6.64985e-34
WBGene00015991	2818	C18H2.4	20.2802	3.88445	1.15095	-3.37501	0.000738127	0.0116542
WBGene00044383	21252	T05A7.11	14.8754	3.86079	1.29716	-2.97633	0.00291717	0.0348965
WBGene00017553	18203	nep-8	413.076	3.85852	0.284465	-13.5641	6.53536e-42	4.97014e-39
WBGene00045727	15862	21ur-719	0.816852	3.84806	3.67987	-1.04571	0.295697	NA
WBGene00199438	25821	W04G3.14	1.91845	3.84661	2.67835	-1.43619	0.15095	NA
WBGene00010107	21084	F55C9.11	1.29768	3.84659	2.67115	-1.44005	0.149853	NA
WBGene00199751	25887	T05E11.10	0.783582	3.8393	5.10696	-0.751779	0.452184	NA
WBGene00008290	27075	bgnt-1.8	1.28894	3.83857	3.11741	-1.23133	0.218198	NA
WBGene00005072	17018	srb-7	2.56539	3.8367	2.18657	-1.75466	0.0793168	0.343624
WBGene00196447	18901	F46C8.10	4.54255	3.83545	1.97531	-1.9417	0.052174	0.265851
WBGene00022209	19790	Y73B3A.7	0.674039	3.82988	5.22606	-0.732842	0.463655	NA
WBGene00012093	23507	T27E7.9	0.749035	3.82987	4.98168	-0.76879	0.442018	NA
WBGene00020271	27883	T05H4.8	0.783709	3.82983	4.34152	-0.88214	0.377701	NA
WBGene00046397	29308	21ur-1460	1.11431	3.82975	3.69945	-1.03522	0.300565	NA
WBGene00000610	14980	col-33	12.5389	3.82218	1.75704	-2.17536	0.0296035	0.185754
WBGene00006190	20007	str-143	2.67358	3.82076	2.67686	-1.42733	0.153485	0.499025
WBGene00219417	16444	F34H10.9	1.13172	3.82043	4.38675	-0.870903	0.383807	NA
WBGene00047727	13874	21ur-3861	4.04419	3.81482	1.92873	-1.97789	0.047941	0.251949
WBGene00018699	8819	F52E1.12	4.14257	3.81465	1.94911	-1.95713	0.0503322	0.259822
WBGene00166002	20221	21ur-10600	2.07111	3.81215	2.62569	-1.45187	0.146538	NA
WBGene00045555	4960	21ur-4158	1.5344	3.81206	2.68119	-1.42178	0.155091	NA
WBGene00202011	26291	R13H4.13	1.2852	3.81165	3.02128	-1.2616	0.207092	NA
WBGene00012028	2751	srz-99	26.1804	3.80685	0.912091	-4.17377	2.99604e-05	0.000766486
WBGene00201273	20409	F46B6.15	0.863884	3.80126	4.9603	-0.766336	0.443476	NA
WBGene00012200	12164	mltn-4	3.57791	3.79896	2.06816	-1.83687	0.0662285	0.306491
WBGene00197543	17903	F57C7.9	2.5495	3.79518	2.53309	-1.49824	0.134071	0.464965
WBGene00014042	15191	ZK666.2	2.13782	3.79341	3.08074	-1.23133	0.218199	NA
WBGene00020145	13285	got-1.1	5.54238	3.77505	1.71798	-2.19737	0.0279939	0.179027
WBGene00044206	438	T26H5.9	705.365	3.73267	0.413551	-9.02591	1.78215e-19	3.28564e-17
WBGene00008615	19075	F09C6.1	45.0805	3.69912	1.13555	-3.25757	0.00112371	0.016408
WBGene00010752	222	K10G4.3	203.478	3.67368	0.315321	-11.6506	2.27813e-31	9.45011e-29
WBGene00005381	23084	srh-165	0.380354	3.63572	5.97671	-0.608315	0.542979	NA
WBGene00005861	26779	srw-114	0.380354	3.63572	5.97671	-0.608315	0.542979	NA
WBGene00173047	40544	21ur-9230	0.380354	3.63572	5.97671	-0.608315	0.542979	NA
WBGene00196285	25241	F40H3.7	0.380354	3.63572	5.97671	-0.608315	0.542979	NA
WBGene00202212	16437	C09D8.15	0.380354	3.63572	5.97671	-0.608315	0.542979	NA
WBGene00005395	21505	srh-180	0.518424	3.63572	5.97671	-0.608315	0.542979	NA
WBGene00018139	20580	sre-24	0.479396	3.63572	5.97671	-0.608315	0.542979	NA
WBGene00198728	21386	W04D2.10	0.569563	3.63572	5.97671	-0.608315	0.542979	NA
WBGene00017662	27796	F21D12.2	0.624159	3.63572	5.97671	-0.608315	0.542979	NA
WBGene00009464	23353	F36D1.5	0.823974	3.63572	5.97671	-0.608315	0.542979	NA
WBGene00021891	23937	Y54G2A.27	0.94112	3.63572	5.97671	-0.608315	0.542979	NA
WBGene00044956	16176	K07C11.12	0.493106	3.63572	5.97671	-0.608315	0.542979	NA
WBGene00201065	18927	C34D10.4	0.669295	3.63572	5.97671	-0.608315	0.542979	NA
WBGene00005723	23156	srv-12	0.473705	3.63572	5.97671	-0.608314	0.542979	NA
WBGene00005177	23031	srg-20	0.610595	3.63572	5.97671	-0.608314	0.542979	NA
WBGene00018868	12277	F55C7.2	0.664747	3.63572	5.97671	-0.608314	0.542979	NA
WBGene00044380	28328	T24E12.12	0.969762	3.6357	5.92375	-0.61375	0.53938	NA
WBGene00005336	18021	srh-117	0.988874	3.63563	5.62038	-0.646866	0.517719	NA
WBGene00045797	7929	21ur-2624	0.676124	3.63557	5.41414	-0.671496	0.501905	NA
WBGene00219551	19439	K07F5.21	0.739154	3.63553	5.30108	-0.685811	0.492833	NA
WBGene00015924	16109	C17H11.4	0.879358	3.63548	5.1443	-0.7067	0.479753	NA
WBGene00014235	27304	ZK1225.1	0.904109	3.63543	5.01569	-0.724812	0.468567	NA
WBGene00219418	22936	F44D12.19	1.34002	3.63519	4.52276	-0.803755	0.421538	NA
WBGene00169236	37216	21ur-15398	0.807591	3.6351	4.36809	-0.832193	0.4053	NA
WBGene00249816	46785	F42G8.18	1.24359	3.63501	4.25143	-0.855008	0.392547	NA
WBGene00013564	9728	Y75B8A.34	1.39476	3.63499	4.20928	-0.863565	0.387827	NA
WBGene00013469	18146	Y68A4A.10	1.12058	3.63495	4.16874	-0.871955	0.383233	NA
WBGene00019964	11312	R08E5.4	1.33433	3.63488	4.06978	-0.893139	0.371783	NA
WBGene00201998	26288	K11C4.13	1.4691	3.63479	3.97812	-0.913695	0.360877	NA
WBGene00008835	21066	F14H8.5	1.09528	3.63477	3.95477	-0.919087	0.35805	NA
WBGene00017790	10772	F25E5.9	1.30481	3.63464	3.81941	-0.951625	0.341287	NA
WBGene00006155	17035	str-99	1.51782	3.63422	3.48677	-1.04229	0.297278	NA
WBGene00005363	23080	srh-147	1.69385	3.63401	3.35483	-1.08322	0.278712	NA
WBGene00012415	16614	Y7A5A.9	1.67992	3.6337	3.19341	-1.13788	0.255172	NA
WBGene00001968	16486	hlh-29	1.67076	3.6336	3.14223	-1.15638	0.247526	NA
WBGene00004994	10061	spp-9	1.73337	3.6336	3.1438	-1.1558	0.247764	NA
WBGene00006631	14550	tsp-5	2.44866	3.63357	3.13196	-1.16016	0.245984	0.626159
WBGene00005780	13552	srw-33	2.18876	3.63304	2.92278	-1.24301	0.213866	NA
WBGene00020524	21212	dmsr-13	1.58207	3.63286	2.86294	-1.26893	0.204467	NA
WBGene00000651	5003	col-75	2.86307	3.63209	2.6574	-1.36678	0.171694	0.526128
WBGene00196374	16307	T21B10.8	2.48285	3.63172	2.57805	-1.40871	0.158921	0.507546
WBGene00005342	19013	srh-125	2.19474	3.63163	2.56157	-1.41774	0.156268	NA
WBGene00009874	2168	F49C12.4	3.23864	3.63163	2.56112	-1.41799	0.156195	0.503153
WBGene00044808	24092	Y39A1A.25	2.63999	3.63124	2.48942	-1.45867	0.144656	0.485357
WBGene00005548	18534	sri-36	6.88708	3.62638	2.01391	-1.80067	0.0717552	0.322005
WBGene00219281	26409	K10D3.8	6.8228	3.62619	2.00358	-1.80986	0.070318	0.318058
WBGene00174201	41551	21ur-12765	0.748654	3.62405	3.7876	-0.95682	0.338658	NA
WBGene00017277	19713	F09C12.2	6.11477	3.62397	1.90064	-1.90671	0.0565585	0.27795
WBGene00010765	9175	K10H10.10	9.94142	3.62314	1.87017	-1.93733	0.0527052	0.267544
WBGene00195017	25028	srpr-2.2	8.51407	3.62255	1.75579	-2.06321	0.0390928	0.221384
WBGene00020918	18263	W01C8.1	10.4426	3.62167	1.82338	-1.98624	0.0470062	0.248683
WBGene00009908	15611	F49H6.5	36.4712	3.61804	0.774047	-4.67418	2.95126e-06	9.82964e-05
WBGene00235247	26907	Y9C9A.111	0.512577	3.61381	5.97714	-0.604605	0.545442	NA
WBGene00045197	11889	C29F4.4	0.556856	3.61381	5.97714	-0.604605	0.545442	NA
WBGene00235089	16950	F46B3.24	0.59326	3.61377	5.46519	-0.661234	0.508462	NA
WBGene00171271	24779	21ur-11570	0.576031	3.61365	4.6096	-0.78394	0.433075	NA
WBGene00005364	15992	srh-148	0.989105	3.61352	4.0613	-0.889744	0.373604	NA
WBGene00044575	14359	F38B6.8	1.13627	3.61348	3.9129	-0.923479	0.355758	NA
WBGene00194656	42284	T05F1.15	0.745001	3.61343	3.79229	-0.952835	0.340674	NA
WBGene00200262	19410	C44E4.10	1.01001	3.61328	3.45543	-1.04568	0.295708	NA
WBGene00023307	16748	H06I04.t1	0.9805	3.61316	3.25916	-1.10862	0.267596	NA
WBGene00077662	10901	T26H2.12	2.22352	3.61311	3.18833	-1.13323	0.257117	NA
WBGene00016370	8767	C33H5.1	1.42133	3.61297	3.02443	-1.1946	0.232245	NA
WBGene00006154	26976	str-97	1.45008	3.61294	2.98261	-1.21133	0.225767	NA
WBGene00018726	14270	F53A9.3	1.49279	3.61282	2.8724	-1.25777	0.208475	NA
WBGene00015406	21667	C03H5.4	1.78339	3.61281	2.86005	-1.2632	0.206518	NA
WBGene00219769	10967	linc-64	1.11707	3.61266	2.74233	-1.31737	0.187715	NA
WBGene00006014	7593	srx-123	1.62166	3.61207	2.41689	-1.49451	0.135041	NA
WBGene00006138	23245	str-78	2.26693	3.61196	2.37161	-1.523	0.127759	NA
WBGene00000782	13986	cpr-2	2.6082	3.61187	2.33973	-1.54372	0.122657	0.442613
WBGene00012630	20060	Y38H6C.18	3.27767	3.61173	2.29024	-1.57701	0.114794	0.428821
WBGene00016925	21162	srb-18	2.71389	3.61172	2.28404	-1.58129	0.113812	0.426113
WBGene00019976	4371	fbxa-195	3.57108	3.61155	2.23621	-1.61503	0.106304	0.408295
WBGene00020807	16140	T25F10.4	3.04595	3.61064	2.03418	-1.77499	0.0759002	0.333654
WBGene00044525	21794	Y73C8B.5	3.35384	3.6102	1.96846	-1.83402	0.0666507	0.307977
WBGene00009024	18082	F21G4.3	3.7823	3.61016	1.96131	-1.84068	0.0656679	0.304922
WBGene00017875	3343	F28A10.7	4.58313	3.61004	1.94639	-1.85474	0.0636335	0.299417
WBGene00045194	19344	smy-1	4.35531	3.60994	1.93351	-1.86704	0.0618959	0.294803
WBGene00020737	3885	T23F2.4	67.4392	3.6096	1.61863	-2.23003	0.0257454	0.169468
WBGene00219415	19929	linc-38	5.68224	3.60937	1.87016	-1.92997	0.0536102	0.269995
WBGene00010355	14620	clec-229	23.8959	3.59925	1.6349	-2.2015	0.0277003	0.177909
WBGene00199918	25920	mir-8192	5.2343	3.59796	1.70385	-2.11167	0.0347149	0.205453
WBGene00022747	9904	ZK470.6	12.3886	3.59737	1.72351	-2.08723	0.036867	0.212538
WBGene00012456	14165	Y17D7C.2	4.47174	3.59522	1.91687	-1.87556	0.0607151	0.291088
WBGene00008796	16566	F14D7.9	1.98589	3.59304	2.50334	-1.4353	0.151202	NA
WBGene00021806	1422	Y53G8AM.6	1.80759	3.59296	2.54601	-1.41121	0.158182	NA
WBGene00000648	18476	col-72	1.87446	3.59296	2.54555	-1.41147	0.158107	NA
WBGene00016772	20095	nhr-166	2.51275	3.59282	2.64002	-1.3609	0.173544	0.528891
WBGene00045295	21264	fbxa-222	1.82426	3.59277	2.67111	-1.34505	0.17861	NA
WBGene00018377	23807	hum-10	1.34154	3.59245	2.96422	-1.21194	0.225537	NA
WBGene00023517	15343	srz-75	1.49155	3.59231	3.13311	-1.14656	0.251562	NA
WBGene00017562	20575	F18C5.9	2.21598	3.59217	3.36082	-1.06884	0.285143	NA
WBGene00006194	14543	str-147	0.934835	3.59188	4.08221	-0.879887	0.378921	NA
WBGene00005782	15535	srw-35	0.885978	3.59187	4.12881	-0.869951	0.384327	NA
WBGene00019575	9846	K09E3.4	0.808788	3.59186	4.16195	-0.863023	0.388125	NA
WBGene00003665	18516	nhr-75	1.07989	3.59173	4.77549	-0.752118	0.45198	NA
WBGene00001967	22485	hlh-28	0.827607	3.59169	5.01269	-0.71652	0.47367	NA
WBGene00202417	46364	E01H11.6	0.368661	3.59157	5.97759	-0.600839	0.547947	NA
WBGene00021042	9371	btb-5	8.49425	3.58996	1.40624	-2.55288	0.0106836	0.0915047
WBGene00005611	11564	srj-23	3.71353	3.58434	2.29292	-1.56322	0.118001	0.434312
WBGene00200091	8951	Y48A6B.18	1.37113	3.58378	2.40264	-1.4916	0.135804	NA
WBGene00199018	16363	F57C7.10	1.86813	3.58338	2.49667	-1.43526	0.151212	NA
WBGene00201960	20422	C05E11.17	1.54315	3.58227	2.88849	-1.24019	0.214906	NA
WBGene00007865	17058	srz-15	0.541956	3.58033	5.97782	-0.598935	0.549216	NA
WBGene00006198	14544	str-151	7.91485	3.5778	2.0636	-1.73377	0.0829591	0.352707
WBGene00001729	5022	grl-20	4.43646	3.57657	2.1543	-1.6602	0.0968735	0.38614
WBGene00021433	22318	Y39A3A.2	3.23167	3.57633	2.17499	-1.6443	0.100115	0.392462
WBGene00015211	21134	B0496.2	2.96521	3.57598	2.20632	-1.62079	0.105062	0.405667
WBGene00219302	12449	Y43F8B.28	2.16542	3.57468	2.3491	-1.52172	0.128078	NA
WBGene00005839	18029	srw-92	2.76817	3.57456	2.36413	-1.512	0.130534	0.458002
WBGene00018176	15737	F38B6.7	4.13918	3.57396	2.4505	-1.45846	0.144714	0.485357
WBGene00201820	8467	F54H5.11	1.79615	3.57392	2.45688	-1.45465	0.145765	NA
WBGene00219767	16937	linc-131	1.49979	3.57317	2.58912	-1.38007	0.167565	NA
WBGene00006207	8074	str-162	2.44895	3.57311	2.6009	-1.3738	0.169504	0.523414
WBGene00019335	11293	K02F6.1	3.068	3.57284	2.65836	-1.34401	0.178947	0.536399
WBGene00019383	15266	K04E7.1	2.12085	3.57273	2.68561	-1.33032	0.183412	NA
WBGene00005724	10551	srv-13	1.93929	3.57235	2.78056	-1.28476	0.198877	NA
WBGene00012067	23502	sqst-3	3.32969	3.57193	2.90362	-1.23016	0.218636	0.590666
WBGene00005088	19007	srd-10	1.8856	3.5716	3.01581	-1.18429	0.236297	NA
WBGene00003058	18506	lov-1	1.94128	3.57132	3.13151	-1.14045	0.2541	NA
WBGene00219637	18943	linc-124	1.40736	3.57131	3.13263	-1.14004	0.254271	NA
WBGene00017963	11779	F31F4.17	1.69495	3.5708	3.38653	-1.05441	0.291693	NA
WBGene00011421	23474	T04B2.1	1.44811	3.57075	3.4184	-1.04457	0.296223	NA
WBGene00043239	18849	F08D12.5	2.41398	3.57071	3.44193	-1.03742	0.299542	0.682618
WBGene00196303	16304	F10C2.10	1.41033	3.57053	3.56241	-1.00228	0.316208	NA
WBGene00007134	17044	pals-28	1.96365	3.57051	3.57471	-0.998826	0.317879	NA
WBGene00198525	20367	F18A1.9	1.27226	3.56997	4.04072	-0.883499	0.376967	NA
WBGene00010298	20043	F59A1.12	1.29075	3.56963	4.47437	-0.797796	0.424989	NA
WBGene00043065	13855	C55C3.7	1.26051	3.56944	4.80836	-0.74234	0.457882	NA
WBGene00018198	15739	F39E9.6	1.5136	3.5694	4.89053	-0.72986	0.465476	NA
WBGene00014189	13717	nhr-245	0.989382	3.56934	5.00303	-0.713436	0.475576	NA
WBGene00005454	26672	srh-248	1.05042	3.56904	5.81727	-0.613525	0.539529	NA
WBGene00006260	27009	str-229	0.997697	3.56903	5.87243	-0.607759	0.543347	NA
WBGene00197892	16343	Y39B6A.78	0.955977	3.56901	5.94553	-0.600284	0.548317	NA
WBGene00202233	46259	F55D12.9	0.421911	3.569	5.97805	-0.597017	0.550496	NA
WBGene00008289	27074	nhr-169	0.362815	3.569	5.97805	-0.597017	0.550496	NA
WBGene00010995	27168	ceh-90	0.647422	3.569	5.97805	-0.597017	0.550496	NA
WBGene00001732	22967	grl-23	3.19139	3.569	5.97805	-0.597017	0.550496	0.860245
WBGene00194933	20738	T12A7.10	0.882969	3.569	5.97805	-0.597017	0.550496	NA
WBGene00022181	1938	pho-9	1793.03	3.56459	0.210355	-16.9456	2.07363e-64	3.44072e-61
WBGene00016718	13747	math-23	4.95733	3.55483	1.77397	-2.00388	0.0450827	0.242371
WBGene00022545	12855	ZC196.1	13.8845	3.53251	0.974968	-3.6232	0.000290978	0.00537
WBGene00000724	8994	col-151	4.97045	3.52712	1.76835	-1.99458	0.0460888	0.245466
WBGene00006191	16526	str-144	24.6519	3.52116	1.14715	-3.06948	0.00214434	0.0276401
WBGene00011465	16602	T05B9.2	9.31904	3.51828	1.25564	-2.80199	0.00507891	0.053615
WBGene00005172	18016	srg-15	6.15542	3.48422	1.53857	-2.26458	0.0235386	0.158542
WBGene00001147	21467	eat-18	5.56682	3.47961	1.6771	-2.07478	0.0380071	0.217394
WBGene00016281	1804	pals-32	157.805	3.47176	0.448815	-7.73539	1.03087e-14	1.22977e-12
WBGene00009312	9138	F32B4.1	7.03366	3.46993	1.49334	-2.3236	0.0201472	0.143196
WBGene00016870	17202	ets-10	7.39512	3.46306	1.64499	-2.10522	0.035272	0.207204
WBGene00044382	4446	Y14H12A.2	4.45054	3.45086	2.03503	-1.69573	0.0899366	0.369266
WBGene00020357	3872	T08E11.1	11.6513	3.44682	1.13107	-3.0474	0.0023083	0.0294007
WBGene00044791	6931	bnc-1	7.09045	3.4323	1.4993	-2.28927	0.0220635	0.152251
WBGene00077664	21831	C43D7.11	10.0983	3.4224	1.4425	-2.37255	0.0176659	0.130648
WBGene00013637	1763	Y105C5A.13	11.3055	3.41663	1.24502	-2.74424	0.00606513	0.0608276
WBGene00007669	14569	C18D1.2	6.42698	3.40907	1.71153	-1.99183	0.0463896	0.246565
WBGene00020646	15289	zmp-6	12.1316	3.39592	1.66023	-2.04546	0.0408098	0.227184
WBGene00012570	8230	Y37H2A.10	5.09639	3.38119	1.4806	-2.28366	0.0223914	0.153411
WBGene00199384	44637	F41E7.15	0.44454	3.37256	5.98238	-0.563748	0.572925	NA
WBGene00045818	24160	21ur-3584	0.611864	3.37256	5.98238	-0.563748	0.572925	NA
WBGene00020021	15277	R12B2.7	4.54345	3.36716	2.4757	-1.36008	0.173804	0.529401
WBGene00044804	28362	ZK938.8	0.581116	3.35942	5.553	-0.604974	0.545196	NA
WBGene00044783	452	T26H5.10	23.0796	3.35719	0.780092	-4.30358	1.68063e-05	0.000453771
WBGene00012399	1737	Y6E2A.5	63.6286	3.35679	0.524779	-6.39659	1.58888e-10	1.12404e-08
WBGene00005240	1590	srh-15	3.04227	3.34887	2.01903	-1.65865	0.0971859	0.387136
WBGene00206392	18934	F47D2.11	1.94233	3.34607	3.87348	-0.863842	0.387675	NA
WBGene00196223	42863	ZK470.8	0.732238	3.34604	3.75341	-0.891467	0.372679	NA
WBGene00022289	13321	Y75B7B.2	1.41013	3.3459	3.38063	-0.989728	0.322307	NA
WBGene00044547	14835	C13A2.12	2.3133	3.3456	2.6417	-1.26646	0.205348	NA
WBGene00196944	3972	T01C3.12	1.76353	3.34552	2.78456	-1.20145	0.229576	NA
WBGene00008632	3644	fbxa-88	14.2246	3.34367	1.07912	-3.09852	0.00194487	0.0254464
WBGene00235181	26906	F35E12.13	36.8108	3.34365	1.65293	-2.02286	0.0430879	0.235956
WBGene00015578	6295	C07G3.10	3.82639	3.33763	1.87255	-1.7824	0.0746848	0.330099
WBGene00016835	16671	C50F2.1	4.67626	3.3348	2.08965	-1.59586	0.110519	0.418506
WBGene00005295	12544	srh-74	1.75436	3.33378	2.77137	-1.20293	0.229003	NA
WBGene00219638	7475	anr-29	0.308192	3.33304	5.98333	-0.557054	0.57749	NA
WBGene00086568	15371	Y2H9A.6	58.4003	3.33073	0.460202	-7.23753	4.56937e-13	4.27693e-11
WBGene00015224	6759	B0507.7	22.0033	3.32956	0.745803	-4.4644	8.02934e-06	0.000239855
WBGene00196102	6468	C29H12.7	2.48229	3.32385	2.28976	-1.45162	0.146607	0.488176
WBGene00219891	12457	F12F6.20	3.75764	3.32367	2.32221	-1.43125	0.152358	0.497312
WBGene00165365	20219	21ur-10756	0.354115	3.31963	5.98365	-0.554784	0.579043	NA
WBGene00168464	36542	21ur-10606	0.305269	3.31963	5.98365	-0.554784	0.579043	NA
WBGene00197133	43360	F14D1.2	0.305269	3.31963	5.98365	-0.554784	0.579043	NA
WBGene00220001	26866	K02F3.15	4.09198	3.31544	2.11928	-1.56442	0.11772	0.433801
WBGene00012218	20057	W02H3.2	2.24791	3.31386	2.24095	-1.47877	0.139201	NA
WBGene00017913	14736	F29A7.3	2.80144	3.31203	2.43781	-1.35861	0.174271	0.530219
WBGene00021833	17788	Y54E10A.13	1.2628	3.30818	3.41807	-0.967852	0.333119	NA
WBGene00012288	27226	sre-32	1.53557	3.30783	3.6206	-0.913614	0.36092	NA
WBGene00011710	7191	T11F9.7	1.58454	3.30736	3.95794	-0.835626	0.403366	NA
WBGene00197021	14411	M01G5.8	0.935115	3.30716	4.13841	-0.799137	0.424211	NA
WBGene00000738	22963	col-165	40.2507	3.30404	0.82735	-3.99352	6.50995e-05	0.00152528
WBGene00010256	210	hrg-3	1969.9	3.29829	0.292444	-11.2784	1.67844e-29	6.65977e-27
WBGene00219849	11969	C36C9.10	2.38793	3.28201	3.24339	-1.01191	0.311583	0.696165
WBGene00010004	17102	F53H2.1	17.8752	3.27727	1.08444	-3.02209	0.00251034	0.0312329
WBGene00015223	11214	B0507.6	65.9003	3.26986	0.437517	-7.47367	7.79915e-14	8.27617e-12
WBGene00008712	11621	F11E6.9	14.3323	3.26633	1.20493	-2.71081	0.00671198	0.0655118
WBGene00017308	18201	F09F9.3	50.4359	3.26512	1.13915	-2.86627	0.00415339	0.0462524
WBGene00013634	7230	Y105C5A.9	4.21617	3.25838	1.94362	-1.67645	0.0936507	0.378167
WBGene00020881	18261	T28A11.19	193.278	3.24798	0.507046	-6.40569	1.49689e-10	1.06308e-08
WBGene00008247	17564	srsx-26	4.11903	3.23403	1.85635	-1.74215	0.0814823	0.34944
WBGene00007097	1119	B0024.4	3449.26	3.22275	0.550518	-5.85404	4.79776e-09	2.78881e-07
WBGene00021176	5404	Y9C9A.1	19.9872	3.21655	1.21147	-2.65508	0.007929	0.0733503
WBGene00017000	17698	D1005.6	7.38296	3.18329	1.47314	-2.16089	0.0307041	0.189649
WBGene00000372	7491	cyp-13A7	19.5928	3.16166	1.50484	-2.101	0.0356413	0.208435
WBGene00008657	6157	clec-154	10.1349	3.13788	1.47648	-2.12525	0.0335661	0.201396
WBGene00021338	400	Y34F4.3	56.4974	3.12661	0.555723	-5.6262	1.84226e-08	9.6902e-07
WBGene00189995	6945	C06E7.88	5.4923	3.116	1.52428	-2.04425	0.0409291	0.227478
WBGene00044900	24094	cnc-11	46.0281	3.11026	1.28165	-2.42676	0.0152344	0.118272
WBGene00009526	682	clec-169	309.554	3.10543	0.334268	-9.29024	1.53941e-20	3.157e-18
WBGene00003181	20980	med-2	5.53918	3.09143	1.57024	-1.96876	0.0489812	0.255576
WBGene00018414	1853	nstp-8	6.93274	3.09059	1.72618	-1.79042	0.073386	0.326932
WBGene00006175	2599	str-124	14.8049	3.08687	1.38138	-2.23462	0.0254421	0.168067
WBGene00015416	19680	C04C3.6	7.76058	3.08404	1.41709	-2.17632	0.0295312	0.185735
WBGene00022319	14335	Y82E9BL.2	5.55935	3.06107	1.78101	-1.71872	0.0856645	0.359714
WBGene00009517	10624	clec-167	30.3784	3.06004	0.841643	-3.63579	0.000277129	0.0051404
WBGene00050910	9933	Y43F8B.17	1.86036	3.05832	2.85924	-1.06963	0.284788	NA
WBGene00169538	13387	21ur-10927	2.75152	3.05369	1.99834	-1.52811	0.126485	0.449784
WBGene00014280	27319	C36F7.t2	0.25357	3.05044	5.99088	-0.50918	0.610626	NA
WBGene00019137	19748	ceh-85	0.25357	3.05044	5.99088	-0.50918	0.610626	NA
WBGene00045059	24107	Y45F10B.18	0.25357	3.05044	5.99088	-0.50918	0.610626	NA
WBGene00167909	24622	21ur-15144	0.25357	3.05044	5.99088	-0.50918	0.610626	NA
WBGene00199624	44776	C02D4.11	0.25357	3.05044	5.99088	-0.50918	0.610626	NA
WBGene00201615	45907	R52.12	0.25357	3.05044	5.99088	-0.50918	0.610626	NA
WBGene00201853	46049	ZK867.22	0.25357	3.05044	5.99088	-0.50918	0.610626	NA
WBGene00202254	46274	ZK381.60	0.25357	3.05044	5.99088	-0.50918	0.610626	NA
WBGene00045501	28515	Y6G8.8	0.352611	3.05044	5.99088	-0.50918	0.610626	NA
WBGene00001062	22965	dpr-1	0.529709	3.05044	5.99088	-0.50918	0.610626	NA
WBGene00219969	26859	F54F11.6	0.56097	3.05044	5.99088	-0.50918	0.610626	NA
WBGene00043058	24036	sre-34	0.559366	3.05044	5.99088	-0.50918	0.610626	NA
WBGene00005701	17029	sru-38	0.616037	3.05044	5.99088	-0.50918	0.610626	NA
WBGene00013502	27274	clec-111	0.30309	3.05044	5.99088	-0.50918	0.610626	NA
WBGene00023254	28194	C44C11.t2	0.312666	3.05044	5.99088	-0.50918	0.610626	NA
WBGene00220176	46702	Y51H4A.940	0.307225	3.05044	5.99088	-0.50918	0.610626	NA
WBGene00011943	27208	T23D5.8	0.318341	3.05044	5.99088	-0.50918	0.610626	NA
WBGene00049771	32326	21ur-2659	0.469143	3.05044	5.99088	-0.50918	0.610626	NA
WBGene00019560	23855	K09C6.6	0.490882	3.05044	5.99088	-0.50918	0.610626	NA
WBGene00017960	16682	F31F4.11	0.951405	3.05044	5.99088	-0.50918	0.610626	NA
WBGene00005337	26639	srh-118	1.01817	3.05044	5.99088	-0.50918	0.610626	NA
WBGene00000628	16473	col-51	2.91335	3.05044	5.99088	-0.50918	0.610626	0.886647
WBGene00168902	16240	21ur-15375	0.510058	3.05044	5.99088	-0.50918	0.610626	NA
WBGene00174384	16270	21ur-13177	0.34692	3.05043	5.99088	-0.509179	0.610626	NA
WBGene00199135	25763	E01G6.4	0.598145	3.05043	5.99088	-0.509179	0.610626	NA
WBGene00006176	20491	str-125	0.620442	3.05043	5.99088	-0.509179	0.610626	NA
WBGene00043327	28291	F45D11.7	0.574155	3.05043	5.99088	-0.509179	0.610626	NA
WBGene00235390	26919	F56A6.8	0.395766	3.05043	5.99088	-0.509179	0.610626	NA
WBGene00000025	19463	abu-2	0.517038	3.05043	5.99088	-0.509179	0.610626	NA
WBGene00005441	15998	srh-234	0.424714	3.05043	5.99088	-0.509179	0.610627	NA
WBGene00008873	27094	F15H10.6	0.424714	3.05043	5.99088	-0.509179	0.610627	NA
WBGene00020746	23890	srbc-66	0.47356	3.05043	5.99088	-0.509179	0.610627	NA
WBGene00013795	23568	nhr-229	0.44027	3.05043	5.99088	-0.509179	0.610627	NA
WBGene00219244	14953	Y51H4A.938	0.544887	3.05037	5.79377	-0.526491	0.598547	NA
WBGene00001961	22484	hlh-17	0.622396	3.05029	5.5893	-0.545737	0.585247	NA
WBGene00005886	16520	srw-139	0.738416	3.05012	5.23138	-0.583043	0.559864	NA
WBGene00015428	21138	C04E7.1	0.856873	3.05012	5.2352	-0.582617	0.560151	NA
WBGene00013760	23415	srbc-34	0.927928	3.0501	5.1912	-0.587551	0.556834	NA
WBGene00003556	26555	nas-40	0.893468	3.05009	5.19109	-0.587563	0.556826	NA
WBGene00199304	22421	C07G1.12	0.626352	3.04978	4.70588	-0.648079	0.516934	NA
WBGene00013356	23553	Y59A8B.24	1.19251	3.0497	4.61208	-0.661243	0.508457	NA
WBGene00198246	25601	C03E10.9	0.816487	3.04955	4.42917	-0.688515	0.491128	NA
WBGene00009775	9148	F46B6.10	1.06448	3.04936	4.2404	-0.71912	0.472067	NA
WBGene00171041	38794	21ur-12950	0.928837	3.04933	4.21358	-0.723691	0.469255	NA
WBGene00016832	21686	sre-49	1.129	3.04929	4.18374	-0.728845	0.466097	NA
WBGene00008327	17071	srz-44	0.989279	3.04921	4.10581	-0.742656	0.45769	NA
WBGene00022840	23966	ZK994.1	1.43879	3.04917	4.08303	-0.746792	0.455189	NA
WBGene00020535	20119	T16A1.4	1.18637	3.04901	3.95057	-0.77179	0.440239	NA
WBGene00171419	39124	21ur-10699	1.08972	3.04896	3.91505	-0.778779	0.43611	NA
WBGene00000432	17967	ceh-7	1.14032	3.04877	3.79698	-0.802946	0.422006	NA
WBGene00012233	10189	clpr-1	1.39159	3.04871	3.75547	-0.811805	0.416904	NA
WBGene00014905	16647	Y51A2A.2	1.35407	3.04842	3.59086	-0.848938	0.395916	NA
WBGene00005362	15528	srh-146	1.32925	3.04809	3.43912	-0.8863	0.375456	NA
WBGene00195326	11925	T06H11.6	1.51507	3.04806	3.425	-0.889944	0.373496	NA
WBGene00008759	20028	F13E9.10	1.61492	3.04796	3.38252	-0.90109	0.36754	NA
WBGene00173233	24900	21ur-6562	0.986891	3.04792	3.36652	-0.905364	0.365272	NA
WBGene00198530	14920	T26A5.10	1.18058	3.04779	3.31632	-0.919028	0.358081	NA
WBGene00013298	23549	Y57G11B.6	2.61203	3.0477	3.27942	-0.929339	0.352713	0.73475
WBGene00005719	10067	srv-8	1.68257	3.04748	3.20369	-0.951242	0.341482	NA
WBGene00198156	25578	T06H11.12	1.21604	3.04688	3.02163	-1.00836	0.313283	NA
WBGene00044564	24081	ZK813.6	2.55245	3.04687	3.01868	-1.00934	0.312812	0.69687
WBGene00219695	13962	linc-126	2.80087	3.045	2.63469	-1.15573	0.24779	0.628148
WBGene00016724	13748	C46H3.1	3.17978	3.04437	2.54433	-1.19653	0.231488	0.607669
WBGene00011079	27170	R07B1.7	2.59778	3.04403	2.49983	-1.2177	0.22334	0.596575
WBGene00045153	15358	F11A10.9	2.51366	3.04345	2.43114	-1.25186	0.210621	0.580352
WBGene00005090	19008	srd-12	4.74523	3.04071	2.19457	-1.38556	0.165881	0.518702
WBGene00007232	19045	C01G10.5	4.74039	3.0406	2.18751	-1.38998	0.164534	0.517022
WBGene00022871	17809	ZK1240.6	5.22818	3.0399	2.14332	-1.41831	0.156099	0.503112
WBGene00045012	22852	K08F4.13	3.0547	3.03934	2.11017	-1.44033	0.149774	0.49389
WBGene00009822	13633	clec-113	2.90989	3.03889	2.08639	-1.45653	0.145245	0.485901
WBGene00219718	10966	linc-42	4.55702	3.03836	2.05934	-1.4754	0.140105	0.477403
WBGene00021083	12822	W08E12.2	10.765	3.03777	2.0317	-1.49519	0.134866	0.466735
WBGene00168401	24639	21ur-10300	0.724585	3.03403	5.23873	-0.579153	0.562486	NA
WBGene00023224	28177	B0280.6	0.711686	3.03383	4.62933	-0.655349	0.512243	NA
WBGene00198126	20792	F32G8.9	0.857159	3.03336	3.82178	-0.793702	0.427369	NA
WBGene00016526	19701	fbxa-8	8.79387	3.03266	1.85513	-1.63474	0.102103	0.397862
WBGene00020946	2408	W02D7.11	25.977	3.02654	1.72855	-1.75091	0.0799612	0.345388
WBGene00171027	11907	21ur-7832	11.8408	3.02292	1.76435	-1.71334	0.0866501	0.362239
WBGene00010318	15617	F59B10.2	4.55479	3.02207	1.74271	-1.73412	0.0828962	0.352603
WBGene00009963	12613	fipr-26	69.0925	3.02013	1.64385	-1.83723	0.066176	0.306401
WBGene00012070	3708	T26H5.8	29.5669	3.01854	0.567461	-5.31939	1.04118e-07	4.59025e-06
WBGene00005756	21515	srw-9	0.730288	3.01777	5.09567	-0.592223	0.553701	NA
WBGene00044961	19339	F56A12.5	0.665776	3.01777	5.15974	-0.584869	0.558636	NA
WBGene00005198	22518	srg-41	0.665187	3.01777	5.38043	-0.56088	0.574879	NA
WBGene00015593	9762	C08E3.1	0.628028	3.01777	4.60519	-0.655299	0.512275	NA
WBGene00005419	23098	srh-209	0.58227	3.01777	5.4812	-0.550568	0.58193	NA
WBGene00011982	27210	T24C2.3	0.738641	3.01777	4.51519	-0.66836	0.503904	NA
WBGene00006122	16021	str-57	0.683031	3.01777	4.48779	-0.672441	0.501303	NA
WBGene00199006	44417	R186.12	0.882891	3.01777	5.07625	-0.594489	0.552185	NA
WBGene00010399	23392	clec-13	0.247723	3.01777	5.99186	-0.503645	0.614511	NA
WBGene00169398	37358	21ur-5673	0.247723	3.01777	5.99186	-0.503645	0.614511	NA
WBGene00172399	24849	21ur-10677	0.247723	3.01777	5.99186	-0.503645	0.614511	NA
WBGene00197981	25542	ZC64.13	0.247723	3.01777	5.99186	-0.503645	0.614511	NA
WBGene00005033	23002	sra-7	0.53694	3.01777	5.55342	-0.543408	0.586849	NA
WBGene00016254	27739	fbxb-114	0.385793	3.01777	5.99186	-0.503645	0.614511	NA
WBGene00198307	25613	F12F6.15	0.346765	3.01777	5.99186	-0.503645	0.614511	NA
WBGene00206481	26392	Y51B9A.14	0.377266	3.01777	5.99186	-0.503645	0.614511	NA
WBGene00006167	14058	str-116	0.442038	3.01777	5.99186	-0.503645	0.614511	NA
WBGene00017845	20577	srsx-9	0.498948	3.01777	5.99186	-0.503645	0.614511	NA
WBGene00022640	23961	nhr-254	0.624561	3.01777	5.99186	-0.503645	0.614511	NA
WBGene00044013	28295	F15H10.9	0.561799	3.01777	5.99186	-0.503645	0.614511	NA
WBGene00005415	15997	srh-204	0.84564	3.01777	4.16602	-0.724376	0.468835	NA
WBGene00167906	11406	21ur-11948	0.674272	3.01776	4.0009	-0.754271	0.450687	NA
WBGene00200101	17404	R06C1.11	0.805191	3.01776	3.73246	-0.808517	0.418793	NA
WBGene00199206	21392	F18A1.10	1.36232	3.01775	3.64207	-0.828581	0.407342	NA
WBGene00010172	18623	oac-36	1.51761	3.01775	3.45901	-0.872432	0.382973	NA
WBGene00170143	12402	21ur-8571	1.03238	3.01773	3.169	-0.952266	0.340962	NA
WBGene00005057	15520	sra-31	1.88451	3.01773	3.06893	-0.983317	0.325451	NA
WBGene00012815	16073	phy-4	1.97805	3.01772	3.01385	-1.00128	0.316689	NA
WBGene00219270	15445	mir-5550	1.32364	3.01772	2.99841	-1.00644	0.314204	NA
WBGene00015821	9262	clec-135	1.76476	3.01771	2.86949	-1.05165	0.292959	NA
WBGene00005725	19992	srv-14	1.24776	3.0177	2.78485	-1.08361	0.278537	NA
WBGene00006286	21038	str-260	2.97489	3.01765	2.49987	-1.20712	0.227385	0.601919
WBGene00194710	9947	mks-2	2.80539	3.01765	2.46396	-1.22471	0.220683	0.593562
WBGene00020534	14301	fbxc-49	3.32425	3.01765	2.42291	-1.24547	0.212961	0.583365
WBGene00017860	23788	F27C1.13	2.70501	3.01764	2.4296	-1.24203	0.214225	0.584897
WBGene00009866	11640	F49C5.3	2.78833	3.01763	2.37326	-1.27151	0.203546	0.570067
WBGene00045238	10891	rpr-1	3.17593	3.01763	2.37573	-1.27019	0.204016	0.57069
WBGene00009817	18610	F47B10.6	1.94071	3.01762	2.35577	-1.28095	0.200211	NA
WBGene00219601	15946	linc-129	1.82658	3.01762	2.34192	-1.28853	0.197563	NA
WBGene00016941	10750	C55B6.5	2.12519	3.01761	2.30222	-1.31074	0.189945	NA
WBGene00195081	18378	C04F6.7	4.20945	3.01759	2.25102	-1.34054	0.180069	0.53794
WBGene00019524	20595	K08D9.2	2.29238	3.01759	2.21874	-1.36004	0.173816	NA
WBGene00016465	23732	C36B7.2	2.55823	3.01756	2.15788	-1.3984	0.161994	0.512253
WBGene00017424	19220	F13C5.3	4.24827	3.01756	2.15458	-1.40053	0.161353	0.511377
WBGene00175036	15396	Y71A12B.21	4.11356	3.01754	2.10595	-1.43287	0.151896	0.496757
WBGene00016670	11754	ilys-3	10.6779	3.01746	1.9487	-1.54845	0.121514	0.441105
WBGene00138719	10906	F26F2.10	6.05978	3.01746	1.94237	-1.5535	0.120305	0.438786
WBGene00044895	12880	R06A10.5	5.01729	3.01745	1.93886	-1.5563	0.119636	0.437493
WBGene00194803	10423	C25F9.16	9.3217	3.01736	1.82588	-1.65255	0.098422	0.388921
WBGene00077769	14859	F33E2.10	8.32821	3.01736	1.81917	-1.65865	0.0971871	0.387136
WBGene00007648	17054	folr-1	9.70409	3.01736	1.81941	-1.65842	0.0972326	0.387178
WBGene00015599	10252	fbxa-164	11.0361	3.01461	1.18072	-2.55319	0.0106741	0.0915036
WBGene00019618	2886	K10C2.2	9.44466	3.01244	1.15466	-2.60894	0.00908237	0.0813802
WBGene00009099	12593	F25B3.2	6.27362	3.00529	1.69527	-1.77275	0.0762697	0.334794
WBGene00003734	9558	nhx-6	2002.6	3.00464	1.7957	-1.67324	0.0942794	0.379379
WBGene00022404	19319	srsx-5	1.30077	3.00364	2.72727	-1.10133	0.270751	NA
WBGene00045130	28437	F28C6.11	0.928849	3.00256	3.29454	-0.911375	0.362098	NA
WBGene00011168	6208	R09D1.12	21.7566	3.00196	1.05403	-2.84809	0.0043983	0.0482149
WBGene00023386	21243	Y67D2.t2	0.560216	3.00151	4.74255	-0.63289	0.526806	NA
WBGene00172419	16815	21ur-12465	0.497732	3.00145	4.90305	-0.61216	0.540432	NA
WBGene00170508	20246	21ur-13416	0.846807	3.00143	4.95874	-0.605281	0.544992	NA
WBGene00195172	25033	K10G4.14	0.493859	3.00119	5.89344	-0.509242	0.610583	NA
WBGene00172169	24833	21ur-13751	0.435055	3.00117	5.99236	-0.500833	0.616489	NA
WBGene00022328	12848	Y82E9BL.12	7.45622	2.99863	1.97382	-1.5192	0.128712	0.454754
WBGene00001107	22966	dsl-5	5.07846	2.99784	2.00649	-1.49407	0.135157	0.467212
WBGene00019112	5851	F59E11.6	3.9321	2.99547	2.12568	-1.40918	0.158781	0.507281
WBGene00014921	11722	Y54E5B.5	4.88274	2.99516	2.14316	-1.39755	0.16225	0.512793
WBGene00009316	17088	abhd-11.1	3.8687	2.99453	2.1833	-1.37156	0.1702	0.524337
WBGene00006689	13569	twk-37	3.98401	2.99432	2.19823	-1.36215	0.17315	0.52823
WBGene00021284	18808	Y24D9A.6	4.18743	2.99409	2.21362	-1.35258	0.176191	0.532516
WBGene00220092	9473	T24H10.12	3.84729	2.99298	2.30114	-1.30065	0.193378	0.556183
WBGene00005524	19015	sri-12	3.98433	2.99288	2.30992	-1.29567	0.19509	0.558731
WBGene00044674	17313	B0280.17	1.83154	2.99176	2.41727	-1.23766	0.215843	NA
WBGene00045188	22367	B0284.5	7.50024	2.99174	1.22412	-2.44399	0.0145259	0.114678
WBGene00020327	14296	clec-21	2.4197	2.9914	2.4573	-1.21735	0.223469	0.596755
WBGene00011549	3700	T06G6.8	2.37451	2.99079	2.5309	-1.18171	0.237321	0.61502
WBGene00014760	22676	F46A8.2	2.41198	2.9904	2.58476	-1.15694	0.247299	0.627636
WBGene00019054	13789	F58F6.6	2.8738	2.98992	2.65669	-1.12543	0.260407	0.63987
WBGene00003642	13522	nhr-52	2.05686	2.98952	2.72342	-1.09771	0.272333	NA
WBGene00206517	9970	T27F7.12	2.08608	2.98915	2.79327	-1.07013	0.284562	NA
WBGene00020945	4903	clec-219	5.22012	2.98908	2.80571	-1.06536	0.286715	0.66789
WBGene00018186	21716	F38E9.4	1.79043	2.98874	2.87663	-1.03897	0.298818	NA
WBGene00008839	20505	sre-37	2.36793	2.98869	2.88754	-1.03503	0.300655	NA
WBGene00200584	19415	B0334.19	1.65948	2.98857	2.91484	-1.0253	0.305224	NA
WBGene00019567	20597	K09D9.9	1.5276	2.98755	3.19319	-0.9356	0.349479	NA
WBGene00005934	16013	srx-43	1.89147	2.98721	3.30969	-0.902566	0.366756	NA
WBGene00044048	19329	F57G9.7	1.43112	2.98711	3.34847	-0.892082	0.372349	NA
WBGene00014195	11210	srz-10	1.91064	2.98676	3.49352	-0.854944	0.392582	NA
WBGene00206469	10460	F58D2.5	1.43487	2.98664	3.55134	-0.840989	0.400354	NA
WBGene00196217	25225	C48D1.12	1.71093	2.98646	3.64264	-0.819861	0.412295	NA
WBGene00012501	2241	Y26D4A.3	1.33869	2.98645	3.64218	-0.819964	0.412237	NA
WBGene00006077	19543	str-9	1.15041	2.98642	3.65714	-0.8166	0.414157	NA
WBGene00020371	14781	oac-60	1.66343	2.98633	3.70986	-0.804971	0.420837	NA
WBGene00018243	27807	F40G9.7	2.21826	2.98632	3.70975	-0.804993	0.420824	NA
WBGene00020492	16139	T13G4.5	1.48826	2.9862	3.78271	-0.789434	0.429859	NA
WBGene00195238	25041	mir-4805	1.1414	2.98612	3.83324	-0.779006	0.435976	NA
WBGene00005144	15987	srd-67	1.52917	2.98606	3.87196	-0.771199	0.440589	NA
WBGene00023342	24021	T05H4.t2	0.914334	2.98604	3.88319	-0.768965	0.441914	NA
WBGene00268207	22951	W08F4.20	1.46882	2.98584	4.02139	-0.74249	0.457791	NA
WBGene00005766	3101	srw-19	2.41232	2.98572	2.92752	-1.01988	0.307784	0.691456
WBGene00017110	27768	clec-176	1.1258	2.98566	4.15756	-0.718128	0.472678	NA
WBGene00202479	20434	R05F9.15	1.03941	2.98551	4.28626	-0.69653	0.486097	NA
WBGene00000613	10990	col-36	1.90126	2.98542	4.37455	-0.682451	0.494954	NA
WBGene00201180	13443	B0563.16	0.798195	2.98541	4.3832	-0.681103	0.495806	NA
WBGene00199251	25780	F46F2.10	0.612829	2.9851	4.72814	-0.631347	0.527813	NA
WBGene00022315	21772	Y81B9A.1	1.10434	2.98509	4.73236	-0.630783	0.528183	NA
WBGene00010950	16056	srt-44	1.14641	2.985	4.84959	-0.615516	0.538214	NA
WBGene00017706	16123	F22E5.7	0.912299	2.98491	4.97866	-0.599541	0.548812	NA
WBGene00018551	21186	F47C12.8	0.889219	2.98484	5.09152	-0.586237	0.557716	NA
WBGene00005070	23011	srb-5	0.866864	2.9848	5.15662	-0.578828	0.562705	NA
WBGene00005473	13547	srh-267	0.90135	2.98478	5.18383	-0.575786	0.56476	NA
WBGene00196681	25314	M03F4.10	0.778802	2.98472	5.28475	-0.56478	0.572223	NA
WBGene00202243	21434	C14H10.6	0.686344	2.98471	5.30507	-0.562614	0.573698	NA
WBGene00006015	18536	srx-124	0.692269	2.98464	5.42791	-0.54987	0.582409	NA
WBGene00255564	16961	mir-8206	0.6847	2.98463	5.44406	-0.548237	0.58353	NA
WBGene00015762	10254	C14C6.8	0.67003	2.98463	5.4541	-0.547226	0.584223	NA
WBGene00001223	26455	ehn-3	1.06226	2.98462	5.46698	-0.545935	0.58511	NA
WBGene00005848	23187	srw-101	0.953694	2.98452	5.69191	-0.524344	0.60004	NA
WBGene00010173	23387	F56H6.13	0.900408	2.98446	5.8024	-0.51435	0.607008	NA
WBGene00005108	13040	srd-30	0.241876	2.98439	5.99287	-0.49799	0.618491	NA
WBGene00005426	26660	srh-216	0.241876	2.98439	5.99287	-0.49799	0.618491	NA
WBGene00005497	26691	srh-293	0.241876	2.98439	5.99287	-0.49799	0.618491	NA
WBGene00006078	26949	str-10	0.241876	2.98439	5.99287	-0.49799	0.618491	NA
WBGene00007676	27049	srz-57	0.241876	2.98439	5.99287	-0.49799	0.618491	NA
WBGene00014536	27508	T28D6.t2	0.241876	2.98439	5.99287	-0.49799	0.618491	NA
WBGene00019981	23866	srbc-59	0.241876	2.98439	5.99287	-0.49799	0.618491	NA
WBGene00168120	36229	21ur-11825	0.241876	2.98439	5.99287	-0.49799	0.618491	NA
WBGene00169191	37177	21ur-14609	0.241876	2.98439	5.99287	-0.49799	0.618491	NA
WBGene00172470	40039	21ur-10637	0.241876	2.98439	5.99287	-0.49799	0.618491	NA
WBGene00199716	44829	C05C9.11	0.241876	2.98439	5.99287	-0.49799	0.618491	NA
WBGene00200826	26080	W06B11.10	0.241876	2.98439	5.99287	-0.49799	0.618491	NA
WBGene00201662	20897	ZC308.6	0.241876	2.98439	5.99287	-0.49799	0.618491	NA
WBGene00201850	26258	F32A6.13	0.241876	2.98439	5.99287	-0.49799	0.618491	NA
WBGene00202132	26317	C16B8.13	0.241876	2.98439	5.99287	-0.49799	0.618491	NA
WBGene00219958	46588	F49E7.5	0.241876	2.98439	5.99287	-0.49799	0.618491	NA
WBGene00005539	23119	sri-27	0.592143	2.98439	5.99287	-0.49799	0.618491	NA
WBGene00198180	25585	F16F9.12	0.300973	2.98439	5.99287	-0.49799	0.618491	NA
WBGene00050038	16204	21ur-2571	0.304683	2.98439	5.99287	-0.49799	0.618491	NA
WBGene00220241	26899	ZK270.5	0.294222	2.98439	5.99287	-0.49799	0.618491	NA
WBGene00019297	27852	K02B2.6	0.306648	2.98439	5.99287	-0.49799	0.618491	NA
WBGene00199485	22915	M117.11	0.364567	2.98439	5.99287	-0.49799	0.618491	NA
WBGene00174826	24982	21ur-15700	0.703341	2.98439	5.99287	-0.49799	0.618491	NA
WBGene00045337	18866	M01B2.12	0.861729	2.98439	5.99287	-0.49799	0.618491	NA
WBGene00020243	18247	T05B4.12	0.519305	2.98439	5.99287	-0.49799	0.618491	NA
WBGene00197150	21360	ZK265.13	0.555742	2.98439	5.99287	-0.49799	0.618491	NA
WBGene00005977	19541	srx-86	0.69954	2.98439	5.99287	-0.49799	0.618491	NA
WBGene00199923	44944	K04G2.14	0.515377	2.98439	5.99287	-0.49799	0.618491	NA
WBGene00077584	33402	C01G10.19	0.340918	2.98439	5.99287	-0.49799	0.618491	NA
WBGene00044390	10390	ZK177.11	0.360069	2.98439	5.99287	-0.49799	0.618491	NA
WBGene00219759	2493	anr-58	0.388415	2.98439	5.99287	-0.49799	0.618491	NA
WBGene00012493	23519	Y20C6A.3	0.424225	2.98439	5.99287	-0.49799	0.618491	NA
WBGene00005410	26656	srh-199	0.456499	2.98439	5.99287	-0.49799	0.618491	NA
WBGene00005527	21014	sri-15	0.588653	2.98439	5.99287	-0.49799	0.618491	NA
WBGene00005612	14051	srj-24	0.589312	2.98439	5.99287	-0.49799	0.618491	NA
WBGene00045100	28420	K03D3.14	0.473296	2.98439	5.99287	-0.49799	0.618491	NA
WBGene00020059	23869	srab-15	0.432919	2.98439	5.99287	-0.49799	0.618491	NA
WBGene00006173	23255	str-122	0.524093	2.98439	5.99287	-0.49799	0.618491	NA
WBGene00012349	27234	W08G11.5	0.41302	2.98439	5.99287	-0.49799	0.618491	NA
WBGene00015438	27707	srbc-2	0.611103	2.98439	5.99287	-0.49799	0.618491	NA
WBGene00006099	26959	str-33	0.474164	2.98439	5.99287	-0.49799	0.618491	NA
WBGene00166302	34594	21ur-8650	0.825928	2.98439	5.99287	-0.497989	0.618491	NA
WBGene00197560	43607	K08A2.12	0.686795	2.98439	5.99287	-0.497989	0.618492	NA
WBGene00013609	8725	clec-37	10.4306	2.97852	1.28076	-2.32558	0.0200408	0.142606
WBGene00004118	21997	pqn-29	23.901	2.97359	0.994625	-2.98966	0.00279286	0.0337808
WBGene00044362	950	F42G2.7	7.08515	2.97335	1.45018	-2.05032	0.0403329	0.225513
WBGene00011894	3707	ttr-23	314.626	2.97171	0.349765	-8.4963	1.95731e-17	2.97708e-15
WBGene00021405	23919	Y38C1AB.3	1.60278	2.96835	2.63258	-1.12755	0.259512	NA
WBGene00014771	4771	F55G11.3	1.97721	2.95965	2.62501	-1.12748	0.259539	NA
WBGene00019379	1868	K04A8.10	38.1711	2.95136	0.877765	-3.36235	0.000772817	0.0120559
WBGene00012270	6226	W04G5.10	3.82904	2.94254	1.51499	-1.94228	0.0521032	0.265713
WBGene00196745	21351	H05G16.3	1.08083	2.93897	4.779	-0.614974	0.538572	NA
WBGene00008492	151	F01D5.1	385.809	2.92844	0.337789	-8.66943	4.34283e-18	7.27205e-16
WBGene00021862	11344	fbxa-48	45.0999	2.92735	0.77121	-3.79579	0.000147175	0.00303187
WBGene00008850	5636	F15B9.6	246.086	2.91311	0.416494	-6.99437	2.66452e-12	2.31585e-10
WBGene00010124	205	F55G11.4	1991.2	2.90353	0.297258	-9.76772	1.54895e-22	3.92659e-20
WBGene00014162	22171	chil-9	2.49848	2.90221	2.71549	-1.06876	0.285177	0.667188
WBGene00196645	11933	C34D10.3	4.41016	2.87148	1.76462	-1.62725	0.103683	0.401703
WBGene00003094	8030	lys-5	50.3589	2.86894	0.619467	-4.63131	3.63358e-06	0.000118007
WBGene00012275	14158	npr-14	11.4187	2.86073	0.951307	-3.00716	0.00263704	0.0323898
WBGene00001237	6515	elc-2	5.48862	2.85411	1.52062	-1.87694	0.0605261	0.290524
WBGene00009811	18093	F47B8.10	5.3492	2.84563	1.5041	-1.89191	0.0585027	0.28389
WBGene00004811	1096	skr-5	65.3227	2.84252	0.45694	-6.22078	4.94697e-10	3.30741e-08
WBGene00015694	4790	ugt-27	23.5931	2.84242	0.892161	-3.18599	0.00144257	0.0200615
WBGene00044461	22359	Y18H1A.14	6.35063	2.84117	1.62331	-1.75023	0.0800783	0.345651
WBGene00009805	689	F47B8.4	162.025	2.84041	0.50594	-5.61411	1.97572e-08	1.02155e-06
WBGene00001705	7532	grd-16	17.0164	2.83422	1.06263	-2.66717	0.0076494	0.0716719
WBGene00012346	12167	W08G11.1	11.9325	2.83199	1.41975	-1.99471	0.0460749	0.245466
WBGene00044295	11376	C09E7.10	7.37104	2.82254	1.43921	-1.96117	0.0498592	0.258835
WBGene00000045	16968	acr-6	8.1601	2.80915	1.46015	-1.92388	0.0543694	0.272026
WBGene00011508	8197	T05H10.3	18.0486	2.80673	1.10322	-2.54412	0.0109552	0.0925717
WBGene00011844	248	T19C9.8	120.92	2.80105	1.01396	-2.76248	0.00573637	0.058565
WBGene00001804	5522	gur-3	3.08192	2.78961	2.38803	-1.16816	0.242742	0.622044
WBGene00012518	3716	comt-2	56.7459	2.78367	0.585583	-4.75367	1.99759e-06	6.91842e-05
WBGene00196079	12416	C29E6.9	1.48667	2.78184	2.74169	-1.01464	0.310276	NA
WBGene00016017	5777	C23G10.11	19.9492	2.77767	0.625353	-4.44177	8.92225e-06	0.000263084
WBGene00007240	15559	C01G10.15	6.59974	2.77601	1.17081	-2.37101	0.0177394	0.130938
WBGene00019605	369	ctsa-1	8251.42	2.77572	0.131653	-21.0836	1.12493e-98	5.13306e-95
WBGene00011933	5693	oac-47	2.5371	2.77115	2.95027	-0.939286	0.347584	0.73055
WBGene00019571	12291	K09E2.2	17.5684	2.76845	1.15914	-2.38836	0.0169237	0.126874
WBGene00003092	558	lys-3	2687.74	2.76796	0.557337	-4.9664	6.82072e-07	2.58282e-05
WBGene00044606	15855	T07G12.14	3.06942	2.76759	2.02903	-1.364	0.172567	0.527587
WBGene00044453	15854	Y102E9.6	2.17854	2.76338	2.46694	-1.12016	0.262645	NA
WBGene00013288	18141	Y57A10C.10	6.52051	2.76116	1.44353	-1.91278	0.0557765	0.27581
WBGene00047238	21269	21ur-5206	1.19325	2.761	4.11661	-0.670697	0.502414	NA
WBGene00005892	16521	srx-1	3.82865	2.76086	2.16817	-1.27336	0.202891	0.568929
WBGene00202496	18437	R02F11.9	2.61078	2.74776	3.41933	-0.803597	0.421629	0.786111
WBGene00018478	3828	otpl-5	11.2738	2.74236	1.14306	-2.39913	0.016434	0.124565
WBGene00044187	10386	ttll-9	7.31111	2.73295	1.18694	-2.30251	0.0213065	0.148869
WBGene00019391	19750	irld-11	6.89973	2.73132	1.59613	-1.71121	0.0870424	0.362822
WBGene00005083	15521	srd-5	8.92214	2.72496	1.32246	-2.06052	0.0393485	0.222212
WBGene00016204	2300	gsto-1	3586.25	2.70648	0.439311	-6.16074	7.24066e-10	4.6864e-08
WBGene00015605	1287	C08E3.13	4.63351	2.70569	1.78816	-1.51312	0.13025	0.457725
WBGene00013404	14187	fbxb-101	10.1188	2.70233	1.28949	-2.09566	0.0361125	0.20999
WBGene00235271	990	C49C8.8	26.1979	2.69987	0.666564	-4.05043	5.11236e-05	0.00122985
WBGene00000412	12	cdr-1	253.577	2.69633	0.315202	-8.55429	1.18598e-17	1.8823e-15
WBGene00020505	15794	T14E8.2	3.11934	2.69624	1.84751	-1.45939	0.144457	0.485357
WBGene00022016	1932	Y61A9LA.4	15.6852	2.6959	1.31487	-2.05031	0.0403339	0.225513
WBGene00022656	20133	ZK105.5	4.38684	2.69097	1.71755	-1.56675	0.117173	0.433128
WBGene00013054	14179	Y50E8A.11	8.91125	2.68614	1.50405	-1.78594	0.0741085	0.328386
WBGene00013162	18137	Y53F4B.16	7.77783	2.68027	1.26143	-2.12478	0.0336048	0.201456
WBGene00044349	444	Y71G12B.32	43.6501	2.66933	0.761802	-3.50397	0.000458379	0.0078779
WBGene00045338	959	M01B2.13	93.7955	2.66209	0.430846	-6.17876	6.46088e-10	4.21157e-08
WBGene00014673	21127	C08H9.9	6.49018	2.65397	1.25603	-2.11299	0.0346019	0.205082
WBGene00009048	1154	cth-1	2746.4	2.65112	0.1842	-14.3926	5.76051e-47	5.25704e-44
WBGene00005113	14043	srd-35	11.6469	2.6462	1.3301	-1.98948	0.0466478	0.247505
WBGene00235296	13466	C07G1.15	1.34931	2.64573	2.79926	-0.945154	0.34458	NA
WBGene00016136	23720	C26B9.7	6.71655	2.64034	1.39836	-1.88816	0.0590042	0.28551
WBGene00165221	33652	21ur-7480	0.190177	2.63508	6.00503	-0.438813	0.660797	NA
WBGene00167753	35897	21ur-14288	0.190177	2.63508	6.00503	-0.438813	0.660797	NA
WBGene00168055	36169	21ur-8622	0.190177	2.63508	6.00503	-0.438813	0.660797	NA
WBGene00220154	26886	Y41D4B.35	0.190177	2.63508	6.00503	-0.438813	0.660797	NA
WBGene00201343	26177	C15H9.13	0.287869	2.63508	6.00503	-0.438813	0.660797	NA
WBGene00201321	16412	F53B1.15	0.374886	2.63508	6.00503	-0.438813	0.660797	NA
WBGene00044352	21251	ZK381.8	0.508929	2.63508	6.00503	-0.438813	0.660797	NA
WBGene00172618	20260	21ur-8982	0.235764	2.63508	6.00503	-0.438813	0.660797	NA
WBGene00047642	24261	21ur-439	0.242523	2.63508	6.00503	-0.438813	0.660797	NA
WBGene00197860	11435	Y38F2AR.17	0.344158	2.63508	6.00503	-0.438813	0.660797	NA
WBGene00165100	20218	21ur-7671	0.356585	2.63508	6.00503	-0.438813	0.660797	NA
WBGene00167080	16226	21ur-13858	0.236852	2.63508	6.00503	-0.438812	0.660798	NA
WBGene00197284	43448	T24A11.5	0.484169	2.63508	5.99382	-0.439633	0.660203	NA
WBGene00219410	19928	C04C3.14	3.16193	2.63486	5.57025	-0.473024	0.636196	0.897365
WBGene00044940	10887	H06I04.8	0.664601	2.63481	5.47823	-0.48096	0.630545	NA
WBGene00020787	23893	T25B6.1	1.22005	2.63408	4.59252	-0.573559	0.566266	NA
WBGene00202402	21939	Y69H2.26	1.18731	2.63374	4.30794	-0.611369	0.540955	NA
WBGene00195385	19382	ZK867.5	0.98781	2.63291	3.81074	-0.690918	0.489617	NA
WBGene00219252	26405	mir-4815	0.882636	2.63269	3.70683	-0.710227	0.477563	NA
WBGene00018277	27809	F41C6.3	0.559351	2.63051	5.96001	-0.44136	0.658952	NA
WBGene00219247	46435	mir-4807	1.33843	2.63039	3.01138	-0.873484	0.382399	NA
WBGene00219614	18942	linc-105	1.5526	2.63021	2.97481	-0.884162	0.376609	NA
WBGene00236797	13470	Y71G12B.44	2.13545	2.62944	2.83495	-0.927509	0.353662	NA
WBGene00005987	14056	srx-96	1.81327	2.62942	2.83042	-0.928984	0.352897	NA
WBGene00198855	15927	F59G1.12	1.26377	2.62909	2.77902	-0.946051	0.344123	NA
WBGene00017379	1326	F11C7.7	3.1024	2.62358	2.24289	-1.16973	0.242108	0.621066
WBGene00019340	6837	K02F6.6	3.17394	2.61932	1.7908	-1.46265	0.143563	0.484167
WBGene00020364	4378	T08E11.8	6.19573	2.61825	1.28852	-2.03198	0.0421558	0.232395
WBGene00022671	2942	ZK177.3	11.4492	2.61624	1.12426	-2.32708	0.0199609	0.142259
WBGene00195478	25084	F58A3.6	0.187254	2.61359	6.00588	-0.435172	0.663438	NA
WBGene00200848	45474	Y51H7C.33	0.365643	2.61359	6.00588	-0.435172	0.663438	NA
WBGene00198746	44276	F08C6.13	0.404041	2.61359	6.00588	-0.435172	0.663438	NA
WBGene00195927	42700	F54D1.17	0.358398	2.61359	6.00588	-0.435171	0.663438	NA
WBGene00023266	28199	F07E5.10	0.884096	2.61359	5.9769	-0.437281	0.661907	NA
WBGene00005841	97	srw-94	0.606133	2.61352	5.64365	-0.463091	0.643299	NA
WBGene00200196	25966	C17G1.12	0.675118	2.61328	4.70163	-0.555826	0.57833	NA
WBGene00008602	1146	oac-14	4978.64	2.61325	0.265304	-9.85003	6.85263e-23	1.83933e-20
WBGene00021072	905	W07B8.4	87.8875	2.61308	1.15125	-2.26977	0.0232212	0.157267
WBGene00235261	46772	T05C7.8	0.849908	2.61272	3.67147	-0.711628	0.476695	NA
WBGene00201294	13942	F55C12.15	0.980176	2.61249	3.42583	-0.762586	0.445711	NA
WBGene00172007	15392	21ur-10500	1.08368	2.6124	3.34405	-0.781208	0.43468	NA
WBGene00008630	11617	nhr-175	1.45375	2.61212	3.13017	-0.834499	0.404	NA
WBGene00013774	18682	clec-193	1.37566	2.61153	2.80611	-0.93066	0.352029	NA
WBGene00022892	12862	ZK1290.11	2.42301	2.61108	2.62919	-0.993112	0.320655	0.706026
WBGene00049248	20662	21ur-3110	1.70844	2.61104	2.61234	-0.999502	0.317551	NA
WBGene00019104	23837	asp-7	2.23981	2.60794	2.09191	-1.24667	0.212517	NA
WBGene00015436	5760	C04E12.6	5.74745	2.59795	1.98046	-1.31179	0.189592	0.550237
WBGene00017370	3329	F10G7.6	5.97321	2.59616	2.11959	-1.22484	0.220635	0.593519
WBGene00206498	984	C29A12.22	1.70717	2.59403	2.64975	-0.978973	0.327593	NA
WBGene00015149	22683	B0336.12	1.92543	2.59363	2.83733	-0.914108	0.36066	NA
WBGene00017918	23793	F29A7.8	0.821021	2.5924	4.01563	-0.645577	0.518553	NA
WBGene00005247	23046	srh-22	0.777958	2.59194	5.24538	-0.494138	0.621209	NA
WBGene00197761	21892	C18A11.10	0.677426	2.59192	5.35095	-0.484385	0.628112	NA
WBGene00201883	18429	R04F11.27	0.243427	2.5918	6.00675	-0.431481	0.666119	NA
WBGene00202052	11451	C41G11.20	0.363599	2.5918	6.00675	-0.431481	0.666119	NA
WBGene00196460	42990	F45E1.8	0.184331	2.5918	6.00675	-0.431481	0.666119	NA
WBGene00023378	24024	Y53G8B.t6	0.231006	2.5918	6.00675	-0.43148	0.666119	NA
WBGene00167867	24617	21ur-14218	0.387163	2.5918	6.00675	-0.43148	0.666119	NA
WBGene00011103	1204	R07E3.2	31.7756	2.58911	0.590201	-4.38683	1.15012e-05	0.000329982
WBGene00005709	8071	sru-46	3.69949	2.58662	1.82938	-1.41393	0.157382	0.50508
WBGene00199819	18918	K08F8.13	2.05833	2.57922	2.40254	-1.07354	0.28303	NA
WBGene00220254	26901	Y105C5A.1285	1.53174	2.57827	2.48988	-1.0355	0.300437	NA
WBGene00044759	10884	T06E6.15	15.9381	2.57822	0.90559	-2.847	0.00441333	0.0483216
WBGene00023066	19802	F53F10.7	2.34443	2.57701	2.62759	-0.98075	0.326716	NA
WBGene00019549	5862	K09C4.4	5.4174	2.57686	1.2122	-2.12577	0.0335221	0.201265
WBGene00174004	8443	21ur-13816	1.82757	2.57652	2.69088	-0.957501	0.338314	NA
WBGene00196848	19395	ZK353.11	1.52499	2.57581	2.79395	-0.921922	0.356569	NA
WBGene00016429	22211	C35A11.2	19.7621	2.57337	1.00822	-2.55239	0.0106985	0.0915471
WBGene00268208	15464	W08F4.21	0.974556	2.57331	3.32621	-0.773644	0.439141	NA
WBGene00007401	21531	C07A9.5	1.27243	2.57315	3.37041	-0.763453	0.445193	NA
WBGene00045376	10894	F25H5.9	0.813934	2.57185	3.88234	-0.662448	0.507684	NA
WBGene00236786	17453	C17H12.37	0.828062	2.57163	3.99987	-0.642927	0.520271	NA
WBGene00001739	17982	grl-30	1.10302	2.57129	4.20518	-0.611458	0.540897	NA
WBGene00005925	15041	srx-34	0.850334	2.57083	4.54362	-0.56581	0.571523	NA
WBGene00197036	20775	E02A10.7	0.610588	2.57059	4.75973	-0.54007	0.589148	NA
WBGene00009613	7141	F41D3.8	0.859014	2.57029	5.09116	-0.504852	0.613663	NA
WBGene00017496	23776	srbc-15	0.670049	2.57004	5.41107	-0.474959	0.634816	NA
WBGene00016834	8298	sre-50	0.597105	2.56996	5.53293	-0.464485	0.6423	NA
WBGene00198767	25689	F26F12.15	0.466227	2.5697	6.00765	-0.427738	0.668842	NA
WBGene00047944	24281	21ur-2471	0.181407	2.5697	6.00765	-0.427738	0.668842	NA
WBGene00050778	24422	21ur-4964	0.181407	2.5697	6.00765	-0.427738	0.668842	NA
WBGene00165202	33635	21ur-12013	0.181407	2.5697	6.00765	-0.427738	0.668842	NA
WBGene00194927	42309	Y51H4A.937	0.181407	2.5697	6.00765	-0.427738	0.668842	NA
WBGene00198571	17390	ZK867.14	0.181407	2.5697	6.00765	-0.427738	0.668842	NA
WBGene00199038	44433	C02D4.9	0.181407	2.5697	6.00765	-0.427738	0.668842	NA
WBGene00201416	45787	C39D10.16	0.181407	2.5697	6.00765	-0.427738	0.668842	NA
WBGene00201846	46045	Y46E12A.11	0.181407	2.5697	6.00765	-0.427738	0.668842	NA
WBGene00197831	43775	M01G5.10	0.272581	2.5697	6.00765	-0.427738	0.668842	NA
WBGene00200667	16396	F56A12.9	0.272581	2.5697	6.00765	-0.427738	0.668842	NA
WBGene00167078	35280	21ur-7313	0.2996	2.5697	6.00765	-0.427738	0.668842	NA
WBGene00197890	25527	F47C8.2	0.30702	2.5697	6.00765	-0.427738	0.668842	NA
WBGene00023288	28205	F49F1.13	0.332766	2.5697	6.00765	-0.427737	0.668842	NA
WBGene00196180	19881	T19D2.6	0.337564	2.56969	6.00765	-0.427737	0.668842	NA
WBGene00044923	28365	T27E4.10	0.274758	2.56969	6.00765	-0.427737	0.668842	NA
WBGene00165981	24526	21ur-5942	0.380529	2.56969	6.00765	-0.427737	0.668843	NA
WBGene00197378	7952	T22A3.11	0.52984	2.56969	6.00765	-0.427737	0.668843	NA
WBGene00168642	15376	21ur-5938	0.5234	2.56969	6.00765	-0.427737	0.668843	NA
WBGene00021513	10353	Y41D4B.6	10.3316	2.56969	1.18658	-2.16562	0.0303405	0.188487
WBGene00005213	23039	srg-56	1.98078	2.55745	2.62339	-0.974864	0.329628	NA
WBGene00044120	12362	C36B1.13	52.5739	2.55702	0.688752	-3.71255	0.000205185	0.00400967
WBGene00016845	318	C50F7.5	8696.52	2.55544	0.3505	-7.29085	3.07997e-13	2.99019e-11
WBGene00020545	18253	adbp-2	4.15684	2.55382	2.06956	-1.23399	0.217206	0.589264
WBGene00004155	1563	pqn-73	34.5625	2.54539	0.813775	-3.12788	0.0017607	0.02344
WBGene00018162	10303	nspb-3	5.12649	2.54455	1.87932	-1.35397	0.175745	0.532072
WBGene00044437	6443	Y47G6A.32	9.54932	2.53885	1.23386	-2.05765	0.0396241	0.223064
WBGene00001434	13499	fkh-2	22.3222	2.53679	0.781025	-3.24803	0.00116207	0.0169139
WBGene00015113	9250	B0281.6	14.5431	2.5352	0.883438	-2.8697	0.0041086	0.0458656
WBGene00015829	15214	math-15	21.4012	2.52743	0.877103	-2.88156	0.0039571	0.044501
WBGene00005757	23165	srw-10	3.47021	2.52623	2.08618	-1.21093	0.225921	0.600308
WBGene00012008	13677	T25B9.2	3.8079	2.52422	1.77103	-1.42528	0.154076	0.499806
WBGene00044088	11372	oac-2	4.18578	2.5213	1.8246	-1.38184	0.167021	0.52038
WBGene00006544	17545	tbx-7	8.32044	2.5205	1.07433	-2.34612	0.0189702	0.136585
WBGene00012271	21624	W05B2.2	8.16962	2.51964	1.33297	-1.89025	0.0587245	0.284458
WBGene00020774	1411	T24E12.5	317.08	2.51945	0.390675	-6.44896	1.12619e-10	8.15682e-09
WBGene00007440	642	C08E8.4	878.597	2.51497	0.385599	-6.52224	6.92651e-11	5.24575e-09
WBGene00007873	11094	dod-21	8.74266	2.50867	1.47858	-1.69668	0.0897576	0.369266
WBGene00019146	361	H02F09.3	103.183	2.4966	0.537009	-4.64909	3.33403e-06	0.000109447
WBGene00077765	22864	T20F10.8	8.91518	2.49284	1.32495	-1.88146	0.0599097	0.288515
WBGene00005606	23136	srj-18	3.87277	2.48994	1.5036	-1.65598	0.0977253	0.387757
WBGene00173376	24908	21ur-11313	1.31947	2.48748	2.75671	-0.902334	0.366879	NA
WBGene00007891	16553	C33B4.2	15.6059	2.48538	1.07581	-2.31024	0.0208747	0.146879
WBGene00018614	16690	pals-31	52.7975	2.48489	0.497517	-4.99459	5.89604e-07	2.26081e-05
WBGene00014809	7759	M142.3	4.93708	2.47957	1.59274	-1.5568	0.119518	0.437426
WBGene00235263	13463	Y66H1A.8	4.87423	2.47776	1.7205	-1.44015	0.149826	0.493972
WBGene00007416	9614	ceh-57	11.9867	2.47168	1.04102	-2.3743	0.0175824	0.1304
WBGene00206507	22432	Y51A2A.16	2.66441	2.47156	2.36315	-1.04587	0.295619	0.678986
WBGene00202512	7968	C25E10.16	7.15857	2.46343	1.49406	-1.64881	0.0991857	0.390664
WBGene00014192	23587	nhr-246	26.838	2.45518	1.36124	-1.80364	0.0712875	0.320793
WBGene00017660	333	F21C10.11	257.818	2.45462	0.449787	-5.45729	4.83459e-08	2.31604e-06
WBGene00006464	99	bath-47	120.016	2.45067	0.34156	-7.17493	7.23423e-13	6.50439e-11
WBGene00235268	10471	Y54G2A.76	16.3857	2.44998	1.13672	-2.15531	0.0311373	0.191545
WBGene00219750	18446	Y38C1AA.19	2.1759	2.44722	2.00141	-1.22275	0.221425	NA
WBGene00018573	13779	oac-30	9.7287	2.44528	1.30072	-1.87994	0.060116	0.289127
WBGene00005039	21499	sra-13	2.3326	2.43097	2.00981	-1.20955	0.226451	NA
WBGene00022655	13329	srsx-40	12.4121	2.42866	0.96194	-2.52475	0.0115782	0.0964072
WBGene00009433	179	F35E12.9	2698.89	2.42742	0.282451	-8.59413	8.39004e-18	1.36728e-15
WBGene00196830	14912	F40H3.8	1.29343	2.41138	3.31503	-0.727406	0.466977	NA
WBGene00018048	5337	clec-137	6.17508	2.41046	1.42009	-1.6974	0.0896218	0.369083
WBGene00044458	14354	K11H12.10	7.48404	2.4094	2.05505	-1.17243	0.241024	0.619689
WBGene00005811	8579	srw-64	5.15729	2.4083	1.70088	-1.41591	0.156802	0.503968
WBGene00009339	18602	F32G8.3	3.04081	2.40811	2.00982	-1.19817	0.230851	0.606972
WBGene00255469	5983	C25G4.17	7.44682	2.40503	1.71041	-1.40611	0.159691	0.508669
WBGene00022891	5929	ZK1290.10	67.3084	2.40473	0.534664	-4.49764	6.87119e-06	0.000208327
WBGene00008883	15094	F16B12.7	10.9034	2.39755	1.19002	-2.01471	0.0439347	0.238949
WBGene00006287	5574	str-261	3.51229	2.39613	1.96434	-1.21981	0.222535	0.595577
WBGene00020325	890	bath-46	145.356	2.39508	0.848054	-2.82421	0.00473976	0.0509182
WBGene00001530	10005	gcy-3	9.03734	2.39378	1.30278	-1.83745	0.0661442	0.306334
WBGene00196606	20765	Y15E3A.7	3.05711	2.39301	2.09453	-1.1425	0.253246	0.633531
WBGene00020832	4900	T26C12.2	4.84011	2.39296	1.51577	-1.57871	0.114402	0.427537
WBGene00008616	11113	fbxa-44	10.951	2.38609	1.17283	-2.03447	0.0419041	0.231423
WBGene00005427	13047	srh-217	5.49737	2.38546	1.51	-1.57978	0.114158	0.426943
WBGene00173135	10914	21ur-7060	2.44687	2.38514	1.89512	-1.25857	0.208185	0.576394
WBGene00008049	13597	C40H5.7	4.94355	2.37032	1.42196	-1.66694	0.0955267	0.38261
WBGene00023104	7411	K10F12.8	4.20923	2.3673	1.64512	-1.43898	0.150156	0.494578
WBGene00008064	11604	C41G7.7	3.56173	2.36107	2.0705	-1.14034	0.254146	0.634652
WBGene00009255	17579	ugt-34	4.51736	2.3518	2.27545	-1.03355	0.301345	0.684609
WBGene00001704	10501	grd-15	6.57714	2.34817	1.8289	-1.28393	0.199168	0.564811
WBGene00014769	2270	F53B2.7	13.3411	2.34803	1.12957	-2.0787	0.0376447	0.215727
WBGene00019520	12795	K08B12.1	45.99	2.34191	0.763723	-3.06644	0.00216623	0.027883
WBGene00219610	487	anr-51	1.73169	2.33825	3.67052	-0.637034	0.524103	NA
WBGene00008636	16035	F10A3.11	1.72816	2.33324	3.028	-0.770556	0.44097	NA
WBGene00022433	15828	Y108F1.5	3.77318	2.33124	1.73718	-1.34197	0.179605	0.53719
WBGene00043061	24037	Y54G2A.38	3.31509	2.32464	1.928	-1.20572	0.227925	0.60291
WBGene00194657	12906	T07D10.10	3.56055	2.31863	1.9708	-1.17649	0.239399	0.617898
WBGene00019996	15276	R10F2.5	9.25156	2.31653	1.14596	-2.02148	0.04323	0.23645
WBGene00001399	21974	fat-7	195.401	2.3146	0.319562	-7.24303	4.38766e-13	4.12802e-11
WBGene00195247	8455	F41D3.15	2.58713	2.31294	1.90762	-1.21247	0.225331	0.599317
WBGene00017764	2847	F25A2.1	74.2989	2.30951	0.510169	-4.52695	5.98402e-06	0.000183872
WBGene00006075	1101	str-7	52.1311	2.30654	0.599242	-3.84909	0.000118559	0.00251037
WBGene00195084	473	C43C3.4	119.571	2.30251	0.603459	-3.81552	0.000135894	0.00282668
WBGene00018428	5838	fbxa-183	7.8102	2.29785	1.67778	-1.36958	0.170819	0.525181
WBGene00007858	16551	C31H5.7	36.868	2.29669	0.549223	-4.18171	2.89328e-05	0.000743776
WBGene00011517	239	cgt-1	164.914	2.29208	0.341263	-6.71645	1.86202e-11	1.51047e-09
WBGene00018490	13261	F46E10.3	4.49869	2.29184	1.70498	-1.3442	0.178882	0.536304
WBGene00013655	17650	lgc-19	3.51989	2.29109	1.56677	-1.4623	0.143658	0.484308
WBGene00010147	2695	F56D5.2	38.3566	2.28972	0.939254	-2.43781	0.0147766	0.116051
WBGene00022566	14339	ZC239.3	3.61477	2.28839	1.48678	-1.53915	0.123767	0.444447
WBGene00194680	12410	Y17D7C.6	5.06171	2.28571	1.73349	-1.31856	0.187316	0.548009
WBGene00018353	7831	fbxa-182	426.382	2.28508	0.23879	-9.56938	1.07544e-21	2.42333e-19
WBGene00007657	10101	pals-3	13.7576	2.28491	0.886752	-2.57672	0.00997431	0.0871058
WBGene00020400	10821	T10B11.4	3.51132	2.28459	1.60643	-1.42215	0.154983	0.500867
WBGene00022142	425	Y71G12B.2	71.7366	2.28418	0.526973	-4.33454	1.46068e-05	0.000402724
WBGene00016927	17204	nhr-172	15.2336	2.28347	1.10656	-2.06359	0.039057	0.221319
WBGene00021504	18818	Y41D4A.1	11.1148	2.28205	1.20693	-1.89079	0.0586526	0.284261
WBGene00015759	301	C14C6.5	1634.15	2.2814	0.167437	-13.6254	2.8267e-42	2.24317e-39
WBGene00010855	14628	M04C7.4	8.28724	2.27962	1.02701	-2.21966	0.026442	0.172549
WBGene00018506	3830	F46F5.15	4.94285	2.27784	1.74848	-1.30276	0.192658	0.555375
WBGene00020656	5395	T21E12.5	5.70733	2.27732	1.58778	-1.43429	0.151491	0.496299
WBGene00005131	9066	srd-53	20.6345	2.27586	0.726274	-3.13361	0.0017267	0.0230621
WBGene00016769	316	C49C8.5	2611.58	2.2756	0.176717	-12.877	6.0623e-38	3.6883e-35
WBGene00006272	8076	str-245	78.4427	2.27553	0.398609	-5.70868	1.13854e-08	6.22172e-07
WBGene00017667	7305	ttr-37	1678.58	2.27408	0.257198	-8.84173	9.42479e-19	1.62284e-16
WBGene00003093	15007	lys-4	3305.77	2.26938	0.257517	-8.81254	1.22343e-18	2.08691e-16
WBGene00017411	13760	F13A2.2	3.08266	2.26727	1.57868	-1.43618	0.150951	0.49562
WBGene00019388	15267	K04F1.9	296.625	2.26646	0.353498	-6.41151	1.44083e-10	1.02727e-08
WBGene00005111	10064	srd-33	4.96889	2.26605	1.94146	-1.16719	0.243133	0.62283
WBGene00206371	7471	F28B12.6	9.71849	2.26359	1.29776	-1.74423	0.0811191	0.348291
WBGene00201625	26219	F45D3.15	4.48068	2.26294	1.5793	-1.43287	0.151894	0.496757
WBGene00015087	294	B0252.1	438.286	2.26275	0.231734	-9.7644	1.60061e-22	4.00196e-20
WBGene00044216	19812	C47E8.10	5.20727	2.26199	1.83476	-1.23285	0.217631	0.589603
WBGene00020459	8367	fbxa-23	9.22202	2.26098	1.26517	-1.78709	0.0739223	0.328003
WBGene00018880	18222	acc-3	23.4205	2.25777	0.654909	-3.44746	0.000565878	0.00936392
WBGene00020664	19286	T21H3.5	4.03194	2.25552	1.52255	-1.48141	0.138498	0.474095
WBGene00012055	11679	srsx-36	1.08157	2.25543	3.62847	-0.621593	0.53421	NA
WBGene00016308	17688	C32B5.15	9.76293	2.25428	1.55152	-1.45295	0.146238	0.487865
WBGene00000442	11482	ceh-19	41.1591	2.25412	0.531984	-4.23719	2.2633e-05	0.000596101
WBGene00001158	20	ech-9	561.957	2.25234	0.363698	-6.19288	5.9076e-10	3.87862e-08
WBGene00022375	6900	Y94H6A.2	15.9369	2.25155	0.77974	-2.88756	0.0038824	0.0437687
WBGene00022487	9899	fbxa-21	133.986	2.2499	0.450026	-4.99948	5.74838e-07	2.21349e-05
WBGene00007818	127	C30F2.4	40.5704	2.2476	0.673228	-3.33855	0.000842179	0.0129717
WBGene00011672	9197	cyp-13A5	5603.14	2.24729	0.505442	-4.4462	8.74028e-06	0.000259394
WBGene00199172	22913	Y71D11A.8	1.60171	2.24278	2.84553	-0.788175	0.430594	NA
WBGene00019090	17230	F59A7.2	69.5521	2.24051	0.465401	-4.81416	1.47821e-06	5.20854e-05
WBGene00165007	24472	21ur-5517	2.03732	2.23738	2.45867	-0.909995	0.362825	NA
WBGene00011494	3697	T05F1.9	165.897	2.23734	0.364204	-6.14309	8.09292e-10	5.14676e-08
WBGene00005296	6571	srh-75	4.67229	2.23343	1.45165	-1.53855	0.123915	0.444447
WBGene00011495	237	T05F1.11	169.288	2.23132	0.307281	-7.2615	3.82833e-13	3.64287e-11
WBGene00044302	1457	F28E10.5	57.5394	2.2297	0.511345	-4.36047	1.29785e-05	0.000363876
WBGene00219752	20931	anr-50	1.28982	2.22765	2.97809	-0.748012	0.454453	NA
WBGene00194983	14898	T25B2.4	6.56853	2.22569	1.25752	-1.7699	0.076744	0.336391
WBGene00019744	375	M02H5.8	2976.14	2.22216	0.454395	-4.89039	1.00639e-06	3.69662e-05
WBGene00220147	26885	Y40B1A.6	1.18329	2.21623	2.89033	-0.766775	0.443216	NA
WBGene00198975	13929	C17H12.33	2.5356	2.2093	2.13906	-1.03283	0.301681	0.684903
WBGene00045207	18325	F13E9.14	41.0034	2.20321	1.21422	-1.81451	0.0695994	0.316396
WBGene00015597	796	fbxa-162	125.298	2.20254	0.630363	-3.49409	0.000475686	0.00813703
WBGene00005589	23131	sri-77	1.47181	2.2014	2.58031	-0.853154	0.393574	NA
WBGene00172819	18365	21ur-6344	1.13295	2.19525	2.53848	-0.864791	0.387153	NA
WBGene00005126	18527	srd-48	1.40918	2.19256	3.83843	-0.571213	0.567855	NA
WBGene00009806	2682	F47B8.5	6.25797	2.18539	1.72405	-1.26759	0.204945	0.571971
WBGene00016999	6795	D1005.5	6.43509	2.18161	1.46644	-1.48769	0.136833	0.470779
WBGene00008044	6620	C40H1.9	16.8735	2.17731	1.02993	-2.11404	0.034512	0.20485
WBGene00018988	8828	F56F11.1	15.5648	2.1771	1.13711	-1.91459	0.055545	0.275495
WBGene00013088	2770	Y51B9A.6	16.0587	2.17593	1.07113	-2.03144	0.0422099	0.232473
WBGene00011286	12146	ttr-29	147.138	2.17552	0.52445	-4.1482	3.35103e-05	0.000843628
WBGene00044280	13863	W02A2.9	813.149	2.1731	0.401277	-5.41546	6.11319e-08	2.83193e-06
WBGene00019495	6838	sdz-24	339.936	2.17179	0.282016	-7.70092	1.35093e-14	1.54107e-12
WBGene00010684	5179	K08F9.1	70.1303	2.17023	0.438594	-4.94815	7.49218e-07	2.81953e-05
WBGene00022215	15825	Y73B3A.13	19.37	2.16934	0.868522	-2.49773	0.012499	0.101844
WBGene00219756	17442	linc-68	3.42034	2.16876	1.60402	-1.35208	0.176351	0.532516
WBGene00044488	448	Y54G2A.45	2298.48	2.16751	0.205112	-10.5675	4.21683e-26	1.39937e-23
WBGene00006535	15046	tba-9	265.965	2.16338	0.293679	-7.36649	1.75178e-13	1.75679e-11
WBGene00006106	6112	str-41	9.59579	2.16123	1.02108	-2.11661	0.0342931	0.203749
WBGene00009757	22603	F46B3.2	4.80339	2.15839	1.34578	-1.60382	0.108753	0.414184
WBGene00009873	17100	F49C12.3	9.37854	2.15797	1.27337	-1.6947	0.0901324	0.369266
WBGene00021178	396	Y9C9A.8	86.4224	2.15536	0.474462	-4.54275	5.55247e-06	0.000171769
WBGene00016185	10261	C28F5.4	4.14009	2.15452	1.72351	-1.25007	0.211272	0.58166
WBGene00013028	15655	efhc-1	5.8495	2.14846	1.57615	-1.3631	0.17285	0.52798
WBGene00219283	15940	F55H12.7	13.6858	2.14236	1.06371	-2.01404	0.0440052	0.239076
WBGene00016786	2320	cyp-35A4	55.5779	2.13681	0.40205	-5.31477	1.0679e-07	4.6854e-06
WBGene00011265	21603	R13H4.7	14.0242	2.1351	0.97509	-2.18965	0.02855	0.181376
WBGene00044660	1460	fbxa-87	39.4706	2.12993	0.634153	-3.3587	0.00078309	0.012185
WBGene00019059	23834	F58F9.6	1.13948	2.12696	4.40202	-0.483178	0.628969	NA
WBGene00010387	10638	H12D21.11	2.71969	2.11936	2.90058	-0.730668	0.464982	0.811913
WBGene00019845	7861	irld-13	9.19561	2.11813	1.38246	-1.53215	0.125486	0.447896
WBGene00045298	28476	fbxc-12	1.90136	2.11734	2.84849	-0.743322	0.457287	NA
WBGene00020873	2406	T28A11.6	34.0877	2.11529	0.787674	-2.68549	0.00724226	0.0692755
WBGene00002205	19490	kin-23	2.23629	2.11082	3.38014	-0.624477	0.532315	NA
WBGene00016527	10271	fbxa-47	4.54542	2.10583	2.0301	-1.0373	0.299595	0.682618
WBGene00005248	23047	srh-23	1.34843	2.10562	3.26824	-0.644268	0.519402	NA
WBGene00020326	15789	math-38	36.8325	2.10167	0.685779	-3.06465	0.00217928	0.0280311
WBGene00013897	17160	ZC443.2	13.1045	2.10064	0.946488	-2.21941	0.026459	0.172598
WBGene00020548	27887	T17A3.12	2.23975	2.09604	2.64515	-0.792409	0.428122	NA
WBGene00269333	17455	F46F5.19	4.33074	2.09522	2.39397	-0.875209	0.38146	0.757665
WBGene00001766	12005	gst-18	11.1936	2.08477	1.22909	-1.69619	0.0898493	0.369266
WBGene00002274	556	lec-11	2580.98	2.08042	0.161556	-12.8774	6.03513e-38	3.6883e-35
WBGene00019660	372	K11H12.4	2245.85	2.07525	0.284149	-7.30339	2.80608e-13	2.75358e-11
WBGene00021792	20616	Y52D5A.1	7.23085	2.07406	1.47818	-1.40312	0.160581	0.509953
WBGene00008520	18582	F02D8.1	6.47157	2.07208	1.5715	-1.31854	0.187324	0.548009
WBGene00008870	16568	F15H9.1	7.67981	2.07085	1.59178	-1.30096	0.193272	0.556136
WBGene00220159	26887	Y44A6C.3	1.44296	2.0692	2.73946	-0.755331	0.45005	NA
WBGene00014754	4770	F40F9.11	6.61058	2.06599	1.51144	-1.3669	0.171655	0.526122
WBGene00045067	4451	F07C6.6	40.75	2.0596	0.970472	-2.12226	0.0338158	0.202173
WBGene00017180	22223	F02E11.2	34.8787	2.05893	0.562914	-3.65764	0.000254551	0.00477625
WBGene00008093	12578	lron-1	16.1463	2.05696	1.21107	-1.69847	0.0894195	0.368333
WBGene00000521	19962	cky-1	5.7435	2.05693	1.75272	-1.17356	0.240571	0.61931
WBGene00202349	8961	T01A4.6	2.35701	2.05231	2.44425	-0.83965	0.401105	NA
WBGene00015019	22679	B0205.4	12.2207	2.05183	1.11249	-1.84435	0.065132	0.303185
WBGene00010508	18105	K02E2.7	2.13488	2.05178	2.81172	-0.729726	0.465558	NA
WBGene00219424	22937	Y54G2A.72	2.21512	2.05027	2.72408	-0.752646	0.451663	NA
WBGene00202231	15437	B0457.19	1.6496	2.05008	3.44248	-0.595524	0.551493	NA
WBGene00003305	15977	mir-77	0.126785	2.0495	6.03324	-0.339702	0.734081	NA
WBGene00003336	14504	mir-242	0.126785	2.0495	6.03324	-0.339702	0.734081	NA
WBGene00005074	23012	srb-9	0.126785	2.0495	6.03324	-0.339702	0.734081	NA
WBGene00005103	26594	srd-25	0.126785	2.0495	6.03324	-0.339702	0.734081	NA
WBGene00005204	26608	srg-47	0.126785	2.0495	6.03324	-0.339702	0.734081	NA
WBGene00005553	23124	sri-41	0.126785	2.0495	6.03324	-0.339702	0.734081	NA
WBGene00005765	26749	srw-18	0.126785	2.0495	6.03324	-0.339702	0.734081	NA
WBGene00005828	23180	srw-81	0.126785	2.0495	6.03324	-0.339702	0.734081	NA
WBGene00006105	26961	str-40	0.126785	2.0495	6.03324	-0.339702	0.734081	NA
WBGene00006252	23268	str-221	0.126785	2.0495	6.03324	-0.339702	0.734081	NA
WBGene00012147	23509	VC27A7L.1	0.126785	2.0495	6.03324	-0.339702	0.734081	NA
WBGene00014289	27326	C49F5.t1	0.126785	2.0495	6.03324	-0.339702	0.734081	NA
WBGene00015521	12218	fipr-16	0.126785	2.0495	6.03324	-0.339702	0.734081	NA
WBGene00020239	23879	T05B4.8	0.126785	2.0495	6.03324	-0.339702	0.734081	NA
WBGene00020845	27894	T27A10.5	0.126785	2.0495	6.03324	-0.339702	0.734081	NA
WBGene00021593	23928	Y46E12A.3	0.126785	2.0495	6.03324	-0.339702	0.734081	NA
WBGene00021672	27930	Y48G1BM.7	0.126785	2.0495	6.03324	-0.339702	0.734081	NA
WBGene00023372	28256	Y47C4A.t2	0.126785	2.0495	6.03324	-0.339702	0.734081	NA
WBGene00044577	28338	F43E12.1	0.126785	2.0495	6.03324	-0.339702	0.734081	NA
WBGene00047977	20655	21ur-2700	0.126785	2.0495	6.03324	-0.339702	0.734081	NA
WBGene00048585	31261	21ur-4130	0.126785	2.0495	6.03324	-0.339702	0.734081	NA
WBGene00048648	4457	21ur-4139	0.126785	2.0495	6.03324	-0.339702	0.734081	NA
WBGene00049358	31952	21ur-5034	0.126785	2.0495	6.03324	-0.339702	0.734081	NA
WBGene00049897	32444	21ur-2434	0.126785	2.0495	6.03324	-0.339702	0.734081	NA
WBGene00166262	34562	21ur-6551	0.126785	2.0495	6.03324	-0.339702	0.734081	NA
WBGene00166608	34854	21ur-8383	0.126785	2.0495	6.03324	-0.339702	0.734081	NA
WBGene00168790	36831	21ur-10105	0.126785	2.0495	6.03324	-0.339702	0.734081	NA
WBGene00169934	37822	21ur-6987	0.126785	2.0495	6.03324	-0.339702	0.734081	NA
WBGene00171152	38890	21ur-11745	0.126785	2.0495	6.03324	-0.339702	0.734081	NA
WBGene00172532	24858	21ur-15225	0.126785	2.0495	6.03324	-0.339702	0.734081	NA
WBGene00195256	17362	F25D1.8	0.126785	2.0495	6.03324	-0.339702	0.734081	NA
WBGene00195337	42382	C31H2.5	0.126785	2.0495	6.03324	-0.339702	0.734081	NA
WBGene00195942	42711	C15C8.9	0.126785	2.0495	6.03324	-0.339702	0.734081	NA
WBGene00196574	43064	F12D9.9	0.126785	2.0495	6.03324	-0.339702	0.734081	NA
WBGene00196598	43080	R186.10	0.126785	2.0495	6.03324	-0.339702	0.734081	NA
WBGene00196791	25331	W01B11.7	0.126785	2.0495	6.03324	-0.339702	0.734081	NA
WBGene00197070	43320	C35B8.6	0.126785	2.0495	6.03324	-0.339702	0.734081	NA
WBGene00197225	43416	T19C4.20	0.126785	2.0495	6.03324	-0.339702	0.734081	NA
WBGene00198668	25672	B0496.14	0.126785	2.0495	6.03324	-0.339702	0.734081	NA
WBGene00199005	16887	Y106G6H.17	0.126785	2.0495	6.03324	-0.339702	0.734081	NA
WBGene00199095	25751	T21B10.11	0.126785	2.0495	6.03324	-0.339702	0.734081	NA
WBGene00199626	44778	ZC317.8	0.126785	2.0495	6.03324	-0.339702	0.734081	NA
WBGene00200491	17411	T06F4.16	0.126785	2.0495	6.03324	-0.339702	0.734081	NA
WBGene00201434	45797	C47A10.14	0.126785	2.0495	6.03324	-0.339702	0.734081	NA
WBGene00202151	26322	W05E10.21	0.126785	2.0495	6.03324	-0.339702	0.734081	NA
WBGene00219232	46432	mir-5547	0.126785	2.0495	6.03324	-0.339702	0.734081	NA
WBGene00021409	27920	Y38C1AB.7	0.217959	2.0495	6.03324	-0.339702	0.734081	NA
WBGene00197229	43420	F52F12.11	0.217959	2.0495	6.03324	-0.339702	0.734081	NA
WBGene00202241	46265	F54B11.14	0.217959	2.0495	6.03324	-0.339702	0.734081	NA
WBGene00005970	23216	srx-79	0.224477	2.0495	6.03324	-0.339702	0.734081	NA
WBGene00023289	20148	F53A3.5	0.224477	2.0495	6.03324	-0.339702	0.734081	NA
WBGene00077766	10411	rgba-1	0.224477	2.0495	6.03324	-0.339702	0.734081	NA
WBGene00197466	43553	F52B10.12	0.224477	2.0495	6.03324	-0.339702	0.734081	NA
WBGene00169697	37612	21ur-5563	0.252398	2.0495	6.03324	-0.339702	0.734081	NA
WBGene00014981	27694	ZK218.9	0.234096	2.0495	6.03324	-0.339702	0.734081	NA
WBGene00015870	27726	C17A2.2	0.234096	2.0495	6.03324	-0.339702	0.734081	NA
WBGene00200613	26045	C08C3.11	0.234096	2.0495	6.03324	-0.339702	0.734081	NA
WBGene00006267	20493	str-239	0.231477	2.0495	6.03324	-0.339702	0.734081	NA
WBGene00023464	28275	srz-80	0.256328	2.0495	6.03324	-0.339702	0.734081	NA
WBGene00172874	40384	21ur-14804	0.256328	2.0495	6.03324	-0.339702	0.734081	NA
WBGene00016528	27744	C39B5.10	0.4391	2.0495	6.03324	-0.339702	0.734081	NA
WBGene00003366	19970	mir-273	0.546411	2.0495	6.03324	-0.339702	0.734081	NA
WBGene00206383	26387	kvs-2	0.347502	2.0495	6.03324	-0.339702	0.734081	NA
WBGene00006070	16019	str-2	0.359709	2.0495	6.03324	-0.339702	0.734081	NA
WBGene00012729	23534	Y39G8B.10	0.559103	2.0495	6.03324	-0.339702	0.734081	NA
WBGene00235209	46766	Y17G9A.90	0.264854	2.0495	6.03324	-0.339701	0.734081	NA
WBGene00195648	25115	W09B12.2	0.225826	2.0495	6.03324	-0.339701	0.734081	NA
WBGene00197600	43633	C14F5.8	0.244977	2.0495	6.03324	-0.339701	0.734081	NA
WBGene00201387	45769	H19M22.10	0.244977	2.0495	6.03324	-0.339701	0.734081	NA
WBGene00201688	26235	Y71A12B.31	0.244977	2.0495	6.03324	-0.339701	0.734081	NA
WBGene00206523	46421	C54E10.10	0.244977	2.0495	6.03324	-0.339701	0.734081	NA
WBGene00014185	21654	ZK1025.5	0.333889	2.0495	6.03324	-0.339701	0.734081	NA
WBGene00196384	25265	ZK792.9	0.273323	2.0495	6.03324	-0.339701	0.734081	NA
WBGene00195888	14403	K07A12.9	0.304073	2.0495	6.03324	-0.339701	0.734081	NA
WBGene00017517	20574	F16G10.2	0.322169	2.0495	6.03324	-0.339701	0.734081	NA
WBGene00077562	24443	ZC443.7	0.322169	2.0495	6.03324	-0.339701	0.734081	NA
WBGene00003701	26557	nhr-111	0.336169	2.0495	6.03324	-0.339701	0.734081	NA
WBGene00005329	26637	srh-110	0.336169	2.0495	6.03324	-0.339701	0.734081	NA
WBGene00018381	27810	F43C11.4	0.333138	2.0495	6.03324	-0.339701	0.734081	NA
WBGene00012505	23520	pals-13	0.330518	2.0495	6.03324	-0.339701	0.734081	NA
WBGene00168707	24649	21ur-15380	0.394397	2.0495	6.03324	-0.339701	0.734081	NA
WBGene00169683	37600	21ur-15059	0.349669	2.0495	6.03324	-0.339701	0.734081	NA
WBGene00011703	23485	srab-19	0.4412	2.0495	6.03324	-0.339701	0.734081	NA
WBGene00195823	19874	F53A9.11	0.50829	2.0495	6.03324	-0.339701	0.734081	NA
WBGene00005193	23036	srg-36	0.47095	2.0495	6.03324	-0.339701	0.734081	NA
WBGene00022341	27945	Y82E9BR.8	0.577792	2.0495	6.03324	-0.339701	0.734081	NA
WBGene00016827	16115	sre-53	0.621448	2.0495	6.03324	-0.339701	0.734081	NA
WBGene00200446	45240	Y51H7C.31	0.531623	2.0495	6.03324	-0.339701	0.734081	NA
WBGene00013503	23558	clec-112	0.65007	2.0495	6.03324	-0.339701	0.734081	NA
WBGene00019930	23864	fbxc-35	0.657595	2.0495	6.03324	-0.339701	0.734081	NA
WBGene00005746	21514	srv-35	0.176306	2.0495	6.03324	-0.339701	0.734081	NA
WBGene00045751	20645	21ur-2649	0.172372	2.0495	6.03324	-0.339701	0.734081	NA
WBGene00049411	20664	21ur-3091	0.172372	2.0495	6.03324	-0.339701	0.734081	NA
WBGene00023138	28122	T14B4.t1	0.175631	2.0495	6.03324	-0.339701	0.734081	NA
WBGene00173806	11914	21ur-15410	0.18044	2.0495	6.03324	-0.339701	0.734081	NA
WBGene00170685	21312	21ur-6528	0.229961	2.0495	6.03324	-0.339701	0.734081	NA
WBGene00172629	40176	21ur-11238	0.232786	2.0495	6.03324	-0.339701	0.734081	NA
WBGene00194833	20737	F17E9.15	0.274672	2.0495	6.03324	-0.339701	0.734081	NA
WBGene00219584	16446	linc-162	0.395063	2.0495	6.03324	-0.339701	0.734081	NA
WBGene00005536	19986	sri-24	0.481362	2.0495	6.03324	-0.339701	0.734081	NA
WBGene00016690	19208	srbc-22	0.440861	2.0495	6.03324	-0.339701	0.734081	NA
WBGene00196483	14911	W05E10.9	0.387545	2.0495	6.03324	-0.339701	0.734081	NA
WBGene00005981	23222	srx-90	0.545553	2.0495	6.03324	-0.339701	0.734081	NA
WBGene00197966	43851	B0393.14	0.615246	2.0495	6.03324	-0.339701	0.734081	NA
WBGene00021616	14322	Y47D7A.2	0.483006	2.0495	6.03324	-0.339701	0.734081	NA
WBGene00045602	28595	21ur-4930	0.347505	2.0495	6.03324	-0.339701	0.734081	NA
WBGene00219835	20442	C26C6.14	0.34422	2.0495	6.03324	-0.339701	0.734081	NA
WBGene00170580	38388	21ur-6311	0.508429	2.0495	6.03324	-0.339701	0.734081	NA
WBGene00005390	23087	srh-174	0.422992	2.0495	6.03324	-0.339701	0.734081	NA
WBGene00201654	26226	K11C4.12	0.437274	2.0495	6.03324	-0.339701	0.734081	NA
WBGene00005447	23103	srh-240	0.606588	2.0495	6.03324	-0.339701	0.734081	NA
WBGene00202178	26327	F38A6.9	0.576093	2.0495	6.03324	-0.339701	0.734081	NA
WBGene00197168	43380	ZC504.9	0.40356	2.0495	6.03324	-0.339701	0.734081	NA
WBGene00049177	24339	21ur-3104	0.451063	2.0495	6.03324	-0.339701	0.734081	NA
WBGene00197078	10433	F44E7.13	0.403551	2.0495	6.03324	-0.339701	0.734081	NA
WBGene00018530	19733	F47B3.6	0.70428	2.0495	6.03324	-0.339701	0.734081	NA
WBGene00005192	26606	srg-35	0.297929	2.0495	6.03324	-0.339701	0.734082	NA
WBGene00196476	42999	C34H3.7	0.297929	2.0495	6.03324	-0.339701	0.734082	NA
WBGene00201148	14437	R04F11.26	0.297929	2.0495	6.03324	-0.339701	0.734082	NA
WBGene00005598	26710	srj-10	0.402621	2.0495	6.03324	-0.339701	0.734082	NA
WBGene00198854	16880	W03G11.16	0.17346	2.0495	6.03324	-0.339701	0.734082	NA
WBGene00077454	33354	Y17D7C.5	0.225806	2.0495	6.03324	-0.339701	0.734082	NA
WBGene00165809	467	21ur-6122	0.31153	2.0495	6.03324	-0.339701	0.734082	NA
WBGene00006221	23263	str-177	0.271152	2.0495	6.03324	-0.339701	0.734082	NA
WBGene00020547	18254	srz-7	0.299073	2.0495	6.03324	-0.339701	0.734082	NA
WBGene00077704	17862	F12A10.9	0.301591	2.0495	6.03324	-0.339701	0.734082	NA
WBGene00196578	43067	F55C12.10	0.470449	2.0495	6.03324	-0.339701	0.734082	NA
WBGene00015372	23688	C03B1.1	0.212357	2.0495	6.03324	-0.339701	0.734082	NA
WBGene00049219	31833	21ur-2156	0.212357	2.0495	6.03324	-0.339701	0.734082	NA
WBGene00197287	20779	Y104H12D.7	0.360919	2.0495	6.03324	-0.339701	0.734082	NA
WBGene00005238	15524	srh-12	0.471443	2.0495	6.03324	-0.339701	0.734082	NA
WBGene00195061	17360	ZK228.13	0.524672	2.0495	6.03324	-0.339701	0.734082	NA
WBGene00005317	19524	srh-98	0.469536	2.0495	6.03324	-0.339701	0.734082	NA
WBGene00219887	19938	F09E10.16	0.728738	2.0495	6.03324	-0.339701	0.734082	NA
WBGene00044201	8420	H39E23.3	0.49859	2.0495	6.03324	-0.339701	0.734082	NA
WBGene00167121	35319	21ur-14624	0.5286	2.0495	6.03324	-0.339701	0.734082	NA
WBGene00044778	12376	K09C6.10	0.220135	2.0495	6.03324	-0.339701	0.734082	NA
WBGene00086552	33449	C17D12.9	0.220135	2.0495	6.03324	-0.339701	0.734082	NA
WBGene00235299	26911	Y69A2AR.48	0.358205	2.0495	6.03324	-0.339701	0.734082	NA
WBGene00005789	19994	srw-42	0.319177	2.0495	6.03324	-0.339701	0.734082	NA
WBGene00021145	16724	clec-129	0.317827	2.0495	6.03324	-0.339701	0.734082	NA
WBGene00007896	23301	C33D3.5	0.416869	2.0495	6.03324	-0.339701	0.734082	NA
WBGene00012820	22137	Y43F8B.10	0.528561	2.0495	6.03324	-0.339701	0.734082	NA
WBGene00202504	26384	Y32B12B.8	0.628399	2.0495	6.03324	-0.339701	0.734082	NA
WBGene00235264	18951	M04G7.5	0.367348	2.0495	6.03324	-0.339701	0.734082	NA
WBGene00019948	23865	R08C7.4	0.407362	2.0495	6.03324	-0.339701	0.734082	NA
WBGene00198932	20815	F29C4.11	0.622927	2.0495	6.03324	-0.339701	0.734082	NA
WBGene00016519	20566	srz-56	0.646761	2.0495	6.03324	-0.339701	0.734082	NA
WBGene00010220	20515	sre-29	0.807638	2.0495	6.03324	-0.339701	0.734082	NA
WBGene00199687	16375	C50E10.13	0.357984	2.0495	6.03324	-0.339701	0.734082	NA
WBGene00195700	15901	F13D12.11	0.629688	2.0495	6.03324	-0.339701	0.734082	NA
WBGene00166509	34772	21ur-10447	0.446491	2.0495	6.03324	-0.339701	0.734082	NA
WBGene00017906	11257	F28F9.2	0.480277	2.0495	6.03324	-0.339701	0.734082	NA
WBGene00195904	42685	T24F1.8	0.313485	2.0495	6.03324	-0.339701	0.734082	NA
WBGene00202333	16439	Y15E3A.15	0.502694	2.0495	6.03324	-0.339701	0.734082	NA
WBGene00005677	23144	sru-14	0.474452	2.0495	6.03324	-0.339701	0.734082	NA
WBGene00171202	38935	21ur-7806	0.40809	2.0495	6.03324	-0.339701	0.734082	NA
WBGene00011568	5201	nhr-26	0.85513	2.0495	6.03324	-0.339701	0.734082	NA
WBGene00021957	16149	Y57E12AL.2	0.572302	2.04936	5.83883	-0.350989	0.725597	NA
WBGene00022756	14342	nhr-251	1.06776	2.04936	5.82849	-0.35161	0.72513	NA
WBGene00174900	42171	21ur-9425	0.529569	2.04929	5.74397	-0.356773	0.721262	NA
WBGene00021407	16147	Y38C1AB.5	0.642351	2.04921	5.63609	-0.363587	0.716167	NA
WBGene00008619	23325	nhr-262	0.628133	2.04914	5.56055	-0.368515	0.71249	NA
WBGene00022216	27938	fbxa-16	0.641237	2.04912	5.53274	-0.370363	0.711112	NA
WBGene00049088	24337	21ur-2619	0.621328	2.0491	5.51271	-0.371705	0.710112	NA
WBGene00023205	16747	Y119D3B.10	0.7407	2.04905	5.45041	-0.375943	0.706959	NA
WBGene00005345	23071	srh-128	0.767963	2.04904	5.4421	-0.376516	0.706533	NA
WBGene00005596	23134	srj-8	0.724132	2.04902	5.42641	-0.377602	0.705726	NA
WBGene00005076	23014	srb-11	0.640175	2.04902	5.42171	-0.377929	0.705483	NA
WBGene00168304	20232	21ur-10305	0.677553	2.049	5.40241	-0.379275	0.704483	NA
WBGene00021958	19311	Y57E12AL.4	0.722242	2.04892	5.31841	-0.385251	0.700052	NA
WBGene00006019	20000	srx-128	0.84235	2.04886	5.25837	-0.389638	0.696804	NA
WBGene00018815	27827	F54D12.1	0.874034	2.04879	5.18999	-0.394758	0.693022	NA
WBGene00018192	21717	F39B3.3	0.810325	2.04873	5.1423	-0.398408	0.690329	NA
WBGene00015069	18162	srt-67	0.872212	2.04872	5.13075	-0.399303	0.68967	NA
WBGene00197716	25495	H15M21.1	0.840855	2.04872	5.12783	-0.39953	0.689503	NA
WBGene00020384	15791	T09D3.3	0.835163	2.04871	5.11584	-0.400464	0.688815	NA
WBGene00023506	12869	srz-11	1.09928	2.04863	5.04384	-0.406164	0.684622	NA
WBGene00013050	27250	lipl-8	0.892287	2.04862	5.043	-0.406231	0.684573	NA
WBGene00219733	11464	linc-53	0.970622	2.04861	5.035	-0.406875	0.6841	NA
WBGene00219395	5980	M199.134	0.914122	2.04854	4.97128	-0.412075	0.680284	NA
WBGene00015600	17677	fbxa-165	0.93061	2.04846	4.90585	-0.417555	0.676273	NA
WBGene00018618	23821	F48G7.7	1.38454	2.04839	4.8569	-0.421749	0.673208	NA
WBGene00005558	13048	sri-46	1.05938	2.04839	4.85149	-0.422218	0.672866	NA
WBGene00220083	46655	T23B12.13	0.639547	2.0483	4.78928	-0.427684	0.668881	NA
WBGene00046257	9932	21ur-4577	0.686828	2.04828	4.77755	-0.428732	0.668119	NA
WBGene00019384	18232	K04F1.1	1.07001	2.04828	4.77598	-0.428872	0.668017	NA
WBGene00011701	13152	srab-17	0.972383	2.04824	4.74651	-0.431526	0.666086	NA
WBGene00199478	17396	C01F6.13	0.674971	2.04811	4.65577	-0.439907	0.660004	NA
WBGene00006165	23253	str-114	1.53862	2.04811	4.65632	-0.439855	0.660042	NA
WBGene00200919	26107	T04C9.11	0.790876	2.04809	4.64748	-0.440688	0.659439	NA
WBGene00005632	23140	srj-53	0.700499	2.04809	4.64384	-0.441034	0.659188	NA
WBGene00012043	23497	irld-52	0.808949	2.04801	4.59235	-0.445961	0.655625	NA
WBGene00077495	33386	Y20C6A.4	1.69069	2.04797	3.48863	-0.587043	0.557175	NA
WBGene00005277	21504	srh-54	1.41625	2.04776	4.44563	-0.460623	0.645069	NA
WBGene00021257	20123	Y22D7AR.3	0.714701	2.04774	4.43101	-0.462138	0.643982	NA
WBGene00044729	24088	Y53F4B.46	0.768647	2.04774	4.42784	-0.462468	0.643746	NA
WBGene00196522	25286	Y32F6A.7	0.867989	2.0477	4.40736	-0.464608	0.642212	NA
WBGene00005842	21516	srw-95	1.14611	2.04769	4.40879	-0.464457	0.64232	NA
WBGene00012965	6237	fipr-17	1.51747	2.04764	4.38048	-0.467447	0.64018	NA
WBGene00010894	11657	M28.2	1.24334	2.04759	4.3519	-0.470505	0.637994	NA
WBGene00201568	19921	Y73B6BL.286	0.995344	2.04759	4.34891	-0.470827	0.637764	NA
WBGene00044610	20632	D2092.10	1.10848	2.04755	4.33103	-0.472763	0.636382	NA
WBGene00021694	23933	Y48G8AR.3	0.968614	2.04749	4.29982	-0.476181	0.633945	NA
WBGene00017899	27803	F28C10.4	1.51787	2.0473	4.20505	-0.486866	0.626353	NA
WBGene00194940	42313	C34C6.9	1.098	2.04728	4.19562	-0.487956	0.625581	NA
WBGene00044240	14827	C47E12.14	1.18525	2.04724	4.17918	-0.489868	0.624228	NA
WBGene00005898	18031	srx-7	1.30353	2.04716	4.14461	-0.493935	0.621352	NA
WBGene00006140	26971	str-81	1.32232	2.04714	4.13326	-0.495285	0.620399	NA
WBGene00000612	12984	col-35	1.29187	2.04713	4.12962	-0.49572	0.620092	NA
WBGene00201168	18928	B0457.16	0.681946	2.04712	4.12239	-0.496584	0.619482	NA
WBGene00201143	21419	F43C9.8	1.0602	2.04702	4.07994	-0.501728	0.615859	NA
WBGene00172577	40130	21ur-7128	0.773564	2.04682	3.99946	-0.511775	0.608808	NA
WBGene00172198	16813	21ur-8826	1.02425	2.04629	3.80487	-0.53781	0.590708	NA
WBGene00007747	27054	C26E1.1	0.988135	2.04621	3.77847	-0.541546	0.588131	NA
WBGene00165786	34155	21ur-9906	0.945736	2.04618	3.76784	-0.543065	0.587085	NA
WBGene00005882	13050	srw-135	1.35748	2.04613	3.74924	-0.545744	0.585242	NA
WBGene00021615	23930	Y47C4A.1	1.16572	2.0461	3.73839	-0.54732	0.584159	NA
WBGene00206462	19434	B0391.14	1.31422	2.04608	3.73264	-0.548158	0.583583	NA
WBGene00005194	19979	srg-37	0.931755	2.04589	3.67641	-0.556491	0.577875	NA
WBGene00013837	5243	fbxa-30	58.1867	2.04572	0.784919	-2.60628	0.00915323	0.0818543
WBGene00206501	15444	F14D7.18	1.24825	2.04561	3.59371	-0.569219	0.569208	NA
WBGene00021708	27932	srbc-37	1.48622	2.0455	3.56204	-0.574249	0.565799	NA
WBGene00000551	22468	clx-1	10.1513	2.0454	3.53624	-0.57841	0.562987	0.866822
WBGene00005104	19519	srd-26	2.38481	2.04529	3.50877	-0.582908	0.559955	0.866127
WBGene00013707	12684	Y106G6E.3	1.6178	2.04529	3.50773	-0.58308	0.559839	NA
WBGene00008472	16560	E03H4.4	1.98269	2.04523	3.49239	-0.585625	0.558128	NA
WBGene00018323	13260	F42A6.1	0.896736	2.0452	3.48595	-0.586699	0.557406	NA
WBGene00006262	23270	str-231	1.81807	2.0452	3.48421	-0.58699	0.557211	NA
WBGene00000860	6507	cwp-2	2.29098	2.04508	3.45677	-0.591616	0.554108	NA
WBGene00197775	25502	F26F12.11	0.918208	2.04507	3.4522	-0.592395	0.553586	NA
WBGene00009424	14105	F35E8.13	1.93861	2.0449	3.41223	-0.599285	0.548983	NA
WBGene00045362	21811	F11D11.12	1.69151	2.0449	3.41193	-0.599338	0.548948	NA
WBGene00018404	19240	nhr-39	1.8863	2.04466	3.35763	-0.608959	0.542552	NA
WBGene00219809	26834	C09H10.20	1.59714	2.04452	3.32726	-0.614477	0.5389	NA
WBGene00044542	18315	CD4.11	1.99834	2.04436	3.29275	-0.620865	0.534688	NA
WBGene00023274	20147	F23C8.10	1.21134	2.04431	3.28224	-0.622839	0.53339	NA
WBGene00195211	17361	C34F6.12	1.22025	2.0443	3.28082	-0.623106	0.533215	NA
WBGene00044964	28381	F22D6.16	0.669567	2.04425	3.27015	-0.625123	0.53189	NA
WBGene00005417	23096	srh-207	1.60776	2.04412	3.24524	-0.629882	0.528772	NA
WBGene00020221	23874	T05A7.3	2.02765	2.04404	3.23	-0.63283	0.526845	NA
WBGene00077725	21833	mir-1832.1	1.01179	2.04398	3.21682	-0.635404	0.525165	NA
WBGene00005160	12541	srg-2	1.16003	2.04393	3.20792	-0.637151	0.524027	NA
WBGene00001817	1043	haf-7	3226.42	2.04377	0.199666	-10.236	1.36807e-24	4.02742e-22
WBGene00022308	23948	Y77E11A.3	1.04767	2.04358	3.15923	-0.646861	0.517722	NA
WBGene00045137	14845	F56A12.6	1.02882	2.04356	3.14012	-0.65079	0.515182	NA
WBGene00045481	24137	M153.5	1.1194	2.04331	3.09807	-0.659544	0.509546	NA
WBGene00005715	23153	srv-4	1.61952	2.04328	3.0937	-0.660467	0.508954	NA
WBGene00199301	15930	K02A4.8	1.41643	2.04314	3.07031	-0.665453	0.505761	NA
WBGene00022256	9392	Y73B6BL.37	3.0392	2.04302	3.04999	-0.669845	0.502956	0.835128
WBGene00045095	17316	mrpr-1	1.51645	2.0429	3.03249	-0.673671	0.500521	NA
WBGene00005164	11560	srg-6	1.50371	2.04281	3.01757	-0.676969	0.498425	NA
WBGene00201351	14942	Y51F10.13	1.53641	2.0427	3.00163	-0.680531	0.496168	NA
WBGene00200151	21405	C39E6.12	2.07755	2.04261	2.98867	-0.683451	0.494322	NA
WBGene00018571	18745	F47F2.3	1.69734	2.04259	2.98546	-0.684179	0.493862	NA
WBGene00044450	18858	fipr-18	2.38461	2.04235	2.95121	-0.69204	0.488912	0.826638
WBGene00012985	23540	Y48C3A.1	1.91422	2.042	2.90257	-0.703513	0.481736	NA
WBGene00014799	13722	K05D4.5	2.16756	2.04195	2.89634	-0.705012	0.480803	NA
WBGene00044264	13862	Y105E8A.32	1.6407	2.04161	2.85289	-0.71563	0.47422	NA
WBGene00021719	13312	fbxb-104	36.5478	2.04158	0.682413	-2.99171	0.00277422	0.0336004
WBGene00197733	4969	T25C12.5	2.00571	2.04148	2.83633	-0.71976	0.471673	NA
WBGene00018527	14267	F47B3.3	1.68973	2.04121	2.80464	-0.727797	0.466738	NA
WBGene00044695	21797	fbxb-27	5.63669	2.04101	1.15278	-1.77052	0.0766414	0.336022
WBGene00011855	17617	clec-183	2.46317	2.04084	2.76301	-0.738632	0.460131	0.808618
WBGene00197879	9961	ZK287.11	1.87604	2.0406	2.73654	-0.745688	0.455856	NA
WBGene00005689	23147	sru-26	3.17909	2.04057	2.73317	-0.746594	0.455309	0.80508
WBGene00017371	16676	sre-39	1.99046	2.04045	2.72046	-0.750039	0.453231	NA
WBGene00044563	17312	T26C11.8	2.1511	2.0403	2.70475	-0.754338	0.450646	NA
WBGene00015862	19199	srt-25	2.50042	2.03992	2.66697	-0.764884	0.444341	0.798295
WBGene00011622	16062	T08G5.1	47.4615	2.0392	0.509962	-3.99874	6.36811e-05	0.00149589
WBGene00050889	11896	T04C12.9	1.83587	2.03875	2.5614	-0.795952	0.42606	NA
WBGene00005053	19972	sra-27	1.95588	2.03867	2.55532	-0.797817	0.424977	NA
WBGene00011841	23492	scl-25	2.49396	2.03847	2.53869	-0.802963	0.421996	0.786111
WBGene00198315	25616	K02A11.9	2.52484	2.03845	2.537	-0.803489	0.421692	0.786111
WBGene00201047	19422	F43C9.7	1.59401	2.03843	2.53545	-0.803973	0.421413	NA
WBGene00235289	14961	Y73B6BL.289	4.70654	2.03836	1.40974	-1.44592	0.1482	0.491211
WBGene00018385	10307	F43C11.8	3.52575	2.03823	2.51972	-0.808912	0.418566	0.784705
WBGene00007179	19043	B0457.4	2.96571	2.03797	2.49991	-0.815218	0.414948	0.78337
WBGene00005488	5571	srh-283	7.81696	2.03784	1.48633	-1.37105	0.170359	0.524439
WBGene00006120	26965	str-55	2.80873	2.0377	2.47992	-0.821683	0.411257	0.780354
WBGene00197302	10936	C33F10.18	2.13912	2.03745	2.46141	-0.827758	0.407808	NA
WBGene00017221	22224	dgn-3	2.2446	2.0373	2.45086	-0.83126	0.405827	NA
WBGene00020888	12329	T28C12.1	4.60497	2.03657	2.04032	-0.998163	0.318201	0.703192
WBGene00194923	42307	linc-121	2.91408	2.03645	2.39357	-0.850799	0.394881	0.768102
WBGene00194715	19863	T25E12.16	3.64846	2.03605	2.36847	-0.859648	0.389983	0.764112
WBGene00008834	18589	F14H8.4	6.42501	2.03468	1.29527	-1.57086	0.116215	0.431568
WBGene00002103	22974	ins-20	3.25291	2.03353	2.23161	-0.911243	0.362168	0.742294
WBGene00020792	11330	T25B6.6	5.9275	2.03339	2.22478	-0.913975	0.36073	0.741127
WBGene00269390	18456	C08F1.13	2.67541	2.03327	2.21887	-0.916356	0.35948	0.740443
WBGene00021169	10349	srt-40	4.09762	2.03319	2.21496	-0.917935	0.358653	0.739907
WBGene00012068	9702	oac-49	15.1223	2.03222	0.833188	-2.43908	0.0147245	0.115841
WBGene00015782	16662	C14F11.7	3.68248	2.03212	2.16733	-0.937616	0.348442	0.731459
WBGene00010509	15121	K02E2.8	9.80597	2.03201	2.16252	-0.93965	0.347397	0.730413
WBGene00202514	17929	T09F5.20	12.5067	2.02887	2.04505	-0.99209	0.321154	0.706565
WBGene00195182	11423	C17G10.10	3.57631	2.02759	1.82873	-1.10874	0.267542	0.647808
WBGene00011097	13137	nhr-206	102.8	2.02714	0.420752	-4.81788	1.45088e-06	5.12215e-05
WBGene00004153	5553	pqn-71	8.68864	2.02705	1.98806	-1.01961	0.307914	0.691528
WBGene00044754	14840	Y119C1B.12	9.66614	2.02686	1.98254	-1.02236	0.306612	0.690781
WBGene00010423	19622	zmp-5	3.72177	2.02619	1.76791	-1.14609	0.251757	0.632397
WBGene00018968	10312	F56D2.8	13.2531	2.02387	1.90372	-1.06312	0.28773	0.668658
WBGene00013901	774	ugt-16	890.211	2.0218	0.201329	-10.0423	9.93286e-24	2.83273e-21
WBGene00005947	11058	srx-56	3.12683	2.02054	1.8742	-1.07809	0.280996	0.66236
WBGene00195177	8453	Y43F8B.25	6.47144	2.01991	1.12909	-1.78896	0.0736209	0.327579
WBGene00009957	201	F53B2.8	4024.15	2.01962	0.205884	-9.8095	1.02479e-22	2.67207e-20
WBGene00015692	4789	ugt-25	1873.63	2.01947	0.182378	-11.073	1.69587e-28	6.19062e-26
WBGene00016696	19703	srbc-19	3.13798	2.01931	1.99685	-1.01125	0.311899	0.696365
WBGene00006111	21030	str-46	1.26923	2.01831	2.89205	-0.69788	0.485252	NA
WBGene00170509	20707	21ur-9328	0.123862	2.01776	6.03512	-0.334337	0.738125	NA
WBGene00197563	7954	B0403.9	0.123862	2.01776	6.03512	-0.334337	0.738125	NA
WBGene00018461	23815	F45D11.16	0.169449	2.01776	6.03512	-0.334337	0.738125	NA
WBGene00219829	46523	C24G6.12	0.218466	2.01776	6.03512	-0.334337	0.738125	NA
WBGene00201869	17424	ZC247.8	0.692425	2.01776	5.40255	-0.373483	0.708789	NA
WBGene00196091	25200	C50F4.18	0.481335	2.01775	5.07495	-0.39759	0.690932	NA
WBGene00201153	11957	C44B7.20	0.799022	2.01773	4.22757	-0.477278	0.633164	NA
WBGene00011022	22099	R05A10.5	0.66848	2.01772	4.00276	-0.504082	0.614204	NA
WBGene00196052	20309	T27E4.14	1.07862	2.01771	3.80899	-0.529722	0.596305	NA
WBGene00173198	20264	21ur-9574	1.24247	2.01768	3.46814	-0.581777	0.560717	NA
WBGene00195627	474	R13A1.13	0.772611	2.01766	3.22638	-0.625363	0.531733	NA
WBGene00012409	22641	Y7A5A.3	1.34624	2.0176	2.83724	-0.711113	0.477014	NA
WBGene00010278	16588	F58G6.8	4.14482	2.01748	2.13731	-0.943937	0.345202	0.728986
WBGene00047399	12385	21ur-3672	6.32125	2.01727	1.99742	-1.00994	0.312525	0.69674
WBGene00005005	15030	spp-20	155.482	2.01517	1.80178	-1.11843	0.263382	0.642852
WBGene00010446	1186	K01A6.4	32.8121	2.01477	1.80981	-1.11325	0.265601	0.645076
WBGene00195069	5465	W03G9.10	3.45997	2.00944	1.66214	-1.20895	0.226684	0.601218
WBGene00019214	5364	H20E11.2	122.517	2.00913	0.363236	-5.5312	3.18044e-08	1.58605e-06
WBGene00009808	10626	srm-4	3.99546	2.00764	1.85885	-1.08004	0.280123	0.661878
WBGene00009826	18611	F47G4.5	4.97561	2.00647	1.63749	-1.22533	0.220451	0.593204
WBGene00011958	13158	T23G4.2	5.01413	2.00471	2.08778	-0.960209	0.33695	0.72124
WBGene00021450	22319	mltn-6	5.12233	2.00434	2.10205	-0.953515	0.340329	0.724564
WBGene00020342	22296	fbxa-201	5.25053	2.00327	2.14546	-0.933727	0.350445	0.733691
WBGene00012523	20533	srbc-65	4.27808	2.00284	2.16422	-0.925435	0.354739	0.737132
WBGene00045415	4958	Y43F8B.15	19.351	2.00279	0.838293	-2.38914	0.0168881	0.126874
WBGene00005594	10550	srj-6	5.06056	2.00242	2.18338	-0.917117	0.359081	0.740223
WBGene00013938	19666	ZK218.4	4.38274	2.00216	1.47631	-1.35619	0.17504	0.531673
WBGene00009155	4660	lhfp-4	13.376	2.00007	1.08726	-1.83955	0.0658344	0.305066
WBGene00021581	914	clec-70	43.5443	1.99951	0.720951	-2.77343	0.00554679	0.057101
WBGene00007163	12568	fbxa-154	3.46595	1.99943	2.33977	-0.854539	0.392807	0.766218
WBGene00219715	6974	anr-18	1.62271	1.99751	2.46719	-0.80963	0.418153	NA
WBGene00021519	409	Y41D4B.17	34.2446	1.99747	0.693477	-2.88037	0.0039721	0.0445872
WBGene00011099	2724	nhr-208	81.7055	1.99741	0.464311	-4.30187	1.6936e-05	0.000455923
WBGene00000756	15477	col-183	6.64491	1.99726	2.48636	-0.803285	0.42181	0.786111
WBGene00020465	19282	T12E12.6	4.24772	1.99674	1.93169	-1.03367	0.301288	0.684609
WBGene00194801	6946	Y6G8.16	2.38859	1.99591	2.59604	-0.76883	0.441994	0.797084
WBGene00021609	27929	irld-17	1.88402	1.99512	2.67071	-0.747037	0.455041	NA
WBGene00044343	6925	clec-77	2.17313	1.99509	2.67326	-0.746313	0.455479	NA
WBGene00219824	26835	C18C4.17	1.94846	1.99474	2.70906	-0.736319	0.461537	NA
WBGene00022352	15326	Y82E9BR.20	3.47664	1.99469	2.71422	-0.734903	0.462398	0.810652
WBGene00005089	23015	srd-11	1.53592	1.99463	2.72016	-0.733276	0.46339	NA
WBGene00044113	13342	C54F6.15	1.99893	1.99447	2.7371	-0.72868	0.466198	NA
WBGene00005165	19009	srg-7	2.23371	1.99444	2.74002	-0.727893	0.466679	NA
WBGene00008009	19577	fbxa-171	1.95036	1.99418	2.76922	-0.720123	0.471449	NA
WBGene00255730	19956	F48G7.15	3.14333	1.99343	2.8587	-0.697319	0.485603	0.824535
WBGene00016137	15692	C26E6.1	5.31	1.99293	1.61154	-1.23666	0.216215	0.58813
WBGene00009431	177	dct-17	368.79	1.99287	0.249601	-7.98422	1.41418e-15	1.78011e-13
WBGene00166258	18881	21ur-6704	1.44555	1.99284	2.93551	-0.678874	0.497218	NA
WBGene00013493	17153	clec-9	2.06678	1.9928	2.94094	-0.677607	0.498021	NA
WBGene00016371	22209	C33H5.2	2.39706	1.99242	2.99595	-0.665037	0.506027	0.836704
WBGene00044159	11373	F26C11.4	1.99702	1.99239	2.99943	-0.664258	0.506525	NA
WBGene00043666	28293	Y45G5AM.4	1.33002	1.99236	3.0038	-0.66328	0.507151	NA
WBGene00201920	19430	C33D12.15	1.58283	1.99231	3.01231	-0.661389	0.508363	NA
WBGene00200176	9967	T19A5.11	1.20871	1.99227	3.01776	-0.660182	0.509137	NA
WBGene00014924	23666	Y57G11C.28	1.24885	1.9922	3.02868	-0.65778	0.51068	NA
WBGene00196884	7950	C54D1.9	2.07105	1.99216	3.03541	-0.656305	0.511628	NA
WBGene00020641	12319	fbxa-68	2.43384	1.99206	3.05042	-0.653043	0.513728	0.841099
WBGene00167348	13886	21ur-5967	1.08352	1.99161	3.12489	-0.637337	0.523906	NA
WBGene00017333	12744	ugt-38	1.62319	1.99156	3.13275	-0.635723	0.524957	NA
WBGene00008328	18071	srz-43	1.68617	1.99134	3.17262	-0.627664	0.530224	NA
WBGene00007426	23291	C08B6.5	1.20656	1.99118	3.20096	-0.622057	0.533904	NA
WBGene00006419	23277	oac-39	1.50382	1.99104	3.2266	-0.617073	0.537187	NA
WBGene00005795	23174	srw-48	1.89642	1.991	3.23549	-0.615362	0.538316	NA
WBGene00044377	24070	Y49F6B.13	1.97022	1.99079	3.27602	-0.607686	0.543396	NA
WBGene00016016	10259	C23G10.10	1.80562	1.99059	3.31648	-0.600213	0.548364	NA
WBGene00169648	18359	21ur-13748	1.11501	1.99057	3.32208	-0.599193	0.549044	NA
WBGene00005201	23037	srg-44	1.25752	1.99048	3.33851	-0.596219	0.551029	NA
WBGene00167685	21842	21ur-9174	1.07303	1.99045	3.34699	-0.594699	0.552044	NA
WBGene00005249	13043	srh-25	1.4385	1.99023	3.39708	-0.585865	0.557966	NA
WBGene00011921	21619	T22C1.12	1.43976	1.99002	3.44382	-0.577853	0.563363	NA
WBGene00201729	13944	C16E9.27	0.924929	1.99001	3.44815	-0.577122	0.563857	NA
WBGene00005500	13548	srh-296	1.2158	1.99	3.449	-0.57698	0.563953	NA
WBGene00219643	14452	linc-78	0.736764	1.98991	3.47171	-0.573179	0.566523	NA
WBGene00219629	26437	linc-87	0.912513	1.98979	3.50259	-0.56809	0.569974	NA
WBGene00045361	18329	clec-253	1.13255	1.98955	3.56171	-0.558596	0.576438	NA
WBGene00201793	26249	E01H11.5	1.47072	1.98928	3.63594	-0.547117	0.584298	NA
WBGene00013798	16083	clec-195	1.06518	1.98928	3.63861	-0.546713	0.584576	NA
WBGene00119201	24468	C08E8.11	1.94326	1.98918	3.66514	-0.54273	0.587316	NA
WBGene00002091	26472	ins-8	12.577	1.98918	3.6655	-0.542677	0.587352	0.8764
WBGene00044511	20630	clec-181	1.82644	1.98907	3.70009	-0.537572	0.590873	NA
WBGene00219612	26435	linc-153	1.30306	1.98904	3.70643	-0.536646	0.591512	NA
WBGene00008478	11110	E03H4.11	5.22709	1.98904	1.67024	-1.19087	0.233704	0.610675
WBGene00006126	13560	str-63	1.46181	1.98884	3.77177	-0.527296	0.597988	NA
WBGene00018825	12780	F54E2.5	1.07966	1.98876	3.79713	-0.523753	0.60045	NA
WBGene00012419	23516	srz-73	1.25961	1.98869	3.81982	-0.520625	0.602628	NA
WBGene00009891	23369	scl-10	1.24859	1.98867	3.8261	-0.519765	0.603227	NA
WBGene00021122	17260	W09G12.8	1.15993	1.98832	3.95169	-0.503156	0.614855	NA
WBGene00044140	23435	F42F12.11	0.828746	1.98822	3.9895	-0.498364	0.618228	NA
WBGene00005850	19996	srw-103	1.12414	1.9882	3.99653	-0.497481	0.61885	NA
WBGene00005169	20479	srg-11	1.2563	1.98817	4.00782	-0.496073	0.619843	NA
WBGene00050968	33347	R11G10.4	1.24396	1.98791	4.11497	-0.483093	0.62903	NA
WBGene00168952	36971	21ur-11082	0.621891	1.98783	4.14949	-0.479054	0.6319	NA
WBGene00044368	24069	K12H6.10	1.10919	1.98779	4.16774	-0.476947	0.6334	NA
WBGene00013454	17150	fbxa-126	1.12084	1.98779	4.16619	-0.477124	0.633274	NA
WBGene00018080	13255	F36A4.1	1.33922	1.98778	4.17018	-0.476666	0.6336	NA
WBGene00235265	26908	W03G1.11	1.12003	1.98778	4.17181	-0.476479	0.633733	NA
WBGene00020244	12311	T05B4.13	1.61661	1.98778	4.17398	-0.47623	0.63391	NA
WBGene00196711	18387	ZK892.9	0.998578	1.98776	4.18096	-0.475431	0.63448	NA
WBGene00018623	21726	F48G7.12	1.14171	1.98776	4.18157	-0.475361	0.63453	NA
WBGene00006201	23261	str-155	1.07796	1.98764	4.23709	-0.469104	0.638995	NA
WBGene00235371	16462	F30B5.11	0.838486	1.98758	4.26332	-0.466206	0.641068	NA
WBGene00171642	39322	21ur-13463	0.547654	1.98756	4.27543	-0.464878	0.642019	NA
WBGene00010753	11143	K10G4.4	0.879451	1.98746	4.32281	-0.459761	0.645688	NA
WBGene00010021	23378	srbc-49	1.14717	1.98744	4.33473	-0.458491	0.6466	NA
WBGene00195003	18893	Y46C8AL.11	0.942135	1.98742	4.34421	-0.457487	0.647321	NA
WBGene00006153	20005	str-96	0.895142	1.98736	4.37544	-0.454207	0.64968	NA
WBGene00008474	21556	nhr-174	0.887986	1.98734	4.38398	-0.453319	0.650319	NA
WBGene00005895	26796	srx-4	0.897052	1.98732	4.39392	-0.452289	0.651061	NA
WBGene00005878	23196	srw-131	0.903933	1.98731	4.39779	-0.451888	0.651349	NA
WBGene00005826	19538	srw-79	0.846392	1.98728	4.41777	-0.449837	0.652828	NA
WBGene00008485	149	ugt-43	172.917	1.98721	0.374283	-5.30939	1.09995e-07	4.79149e-06
WBGene00008855	13093	F15D3.5	0.812047	1.98707	4.52878	-0.438766	0.660831	NA
WBGene00044589	12370	C29F5.8	1.36773	1.98707	4.53563	-0.438101	0.661313	NA
WBGene00045202	24122	Y64G10A.13	0.886366	1.98697	4.59099	-0.432797	0.665162	NA
WBGene00023282	17812	F39E9.9	0.731931	1.98694	4.60735	-0.431255	0.666283	NA
WBGene00044960	24098	fbxa-173	0.620849	1.98691	4.6274	-0.429381	0.667646	NA
WBGene00196852	21355	C02F4.10	0.684076	1.98689	4.64152	-0.428069	0.668601	NA
WBGene00009362	23350	F33E2.6	1.41687	1.98688	4.64504	-0.427743	0.668838	NA
WBGene00005403	23091	srh-189	1.13078	1.98669	4.77049	-0.416453	0.677078	NA
WBGene00016497	23738	vps-32.2	0.67306	1.98668	4.77495	-0.416064	0.677363	NA
WBGene00000688	11490	col-114	0.948835	1.98655	4.87209	-0.407741	0.683464	NA
WBGene00006178	26984	str-129	0.975675	1.98649	4.91697	-0.404006	0.686208	NA
WBGene00045398	12885	Y71F9AM.8	0.967419	1.98644	4.95392	-0.400983	0.688432	NA
WBGene00019553	20596	K09C4.9	0.894717	1.98642	4.96855	-0.399799	0.689305	NA
WBGene00021067	17776	W06H8.4	0.961345	1.98638	4.9954	-0.397642	0.690894	NA
WBGene00044370	28325	C41H7.9	0.87221	1.98632	5.04922	-0.39339	0.694031	NA
WBGene00014835	22176	T09F5.4	0.888551	1.98631	5.05502	-0.392938	0.694365	NA
WBGene00016430	23730	C35A11.3	0.861424	1.9863	5.06696	-0.39201	0.695051	NA
WBGene00011797	9201	T16G1.3	4.14365	1.98627	1.98657	-0.999848	0.317384	0.702141
WBGene00007805	23297	clec-231	0.96715	1.98621	5.13869	-0.386521	0.699111	NA
WBGene00018003	23795	F33D11.6	0.847821	1.98621	5.13683	-0.386661	0.699007	NA
WBGene00018536	21185	F47B7.5	0.813414	1.98617	5.17611	-0.383719	0.701187	NA
WBGene00015758	21673	nhr-155	0.827947	1.98615	5.1968	-0.382187	0.702323	NA
WBGene00005480	17025	srh-275	0.873801	1.98605	5.27866	-0.376242	0.706737	NA
WBGene00009756	17588	F46B3.1	0.880828	1.98605	5.27843	-0.376259	0.706725	NA
WBGene00200756	10449	H01A20.4	0.767797	1.98605	5.28136	-0.376049	0.70688	NA
WBGene00014806	20556	M01G12.8	0.726388	1.98603	5.30226	-0.374563	0.707986	NA
WBGene00012580	15651	Y38E10A.2	0.704983	1.98601	5.32367	-0.373053	0.709109	NA
WBGene00005859	23190	srw-112	0.704498	1.98597	5.36172	-0.370398	0.711086	NA
WBGene00010764	12136	K10H10.9	0.569747	1.98579	5.54187	-0.358326	0.7201	NA
WBGene00013316	19161	Y57G11C.21	0.685393	1.98578	5.55626	-0.357395	0.720796	NA
WBGene00196949	25362	C47G2.13	0.686928	1.98577	5.56945	-0.356547	0.721431	NA
WBGene00015575	20083	srbc-35	1.18039	1.98574	5.595	-0.354914	0.722654	NA
WBGene00268211	20954	T02H6.12	0.635256	1.98571	5.63307	-0.35251	0.724456	NA
WBGene00008983	27098	F20E11.5	0.62214	1.98568	5.67524	-0.349884	0.726426	NA
WBGene00007078	21044	AC8.6	0.598382	1.98564	5.72638	-0.346752	0.728777	NA
WBGene00018557	21187	srt-38	0.585233	1.98559	5.78027	-0.343512	0.731213	NA
WBGene00197280	11433	ZC513.16	0.537915	1.98559	5.77821	-0.343634	0.731122	NA
WBGene00196753	20769	W06B11.6	0.518291	1.98555	5.83577	-0.340237	0.733678	NA
WBGene00169767	13890	21ur-9715	0.529839	1.98553	5.85044	-0.339382	0.734322	NA
WBGene00012248	8699	W04E12.3	0.547115	1.98552	5.87327	-0.33806	0.735318	NA
WBGene00020982	15300	ilys-6	0.521341	1.98551	5.88223	-0.337544	0.735707	NA
WBGene00014825	18159	R13.5	1.00886	1.9855	5.90163	-0.336432	0.736545	NA
WBGene00006203	26989	str-158	0.504321	1.98547	5.93988	-0.33426	0.738183	NA
WBGene00018938	19253	F56C3.1	0.512767	1.98546	5.95137	-0.333614	0.738671	NA
WBGene00009905	27124	clec-240	2.9188	1.98543	5.98932	-0.331495	0.740271	0.93243
WBGene00005439	23101	srh-231	0.120938	1.9854	6.03707	-0.328867	0.742256	NA
WBGene00009913	27125	F49H6.12	0.120938	1.9854	6.03707	-0.328867	0.742256	NA
WBGene00016050	23718	srt-29	0.120938	1.9854	6.03707	-0.328867	0.742256	NA
WBGene00020874	15298	srbc-5	0.120938	1.9854	6.03707	-0.328867	0.742256	NA
WBGene00021604	16148	Y46H3C.4	0.120938	1.9854	6.03707	-0.328867	0.742256	NA
WBGene00044126	28308	srsx-23	0.120938	1.9854	6.03707	-0.328867	0.742256	NA
WBGene00046123	29054	21ur-4521	0.120938	1.9854	6.03707	-0.328867	0.742256	NA
WBGene00047901	20186	21ur-5284	0.120938	1.9854	6.03707	-0.328867	0.742256	NA
WBGene00050099	32629	21ur-3428	0.120938	1.9854	6.03707	-0.328867	0.742256	NA
WBGene00050790	33251	21ur-4777	0.120938	1.9854	6.03707	-0.328867	0.742256	NA
WBGene00165720	24506	21ur-8932	0.120938	1.9854	6.03707	-0.328867	0.742256	NA
WBGene00167329	35508	21ur-8374	0.120938	1.9854	6.03707	-0.328867	0.742256	NA
WBGene00168200	36303	21ur-6822	0.120938	1.9854	6.03707	-0.328867	0.742256	NA
WBGene00169443	37398	21ur-15436	0.120938	1.9854	6.03707	-0.328867	0.742256	NA
WBGene00169560	37499	21ur-5536	0.120938	1.9854	6.03707	-0.328867	0.742256	NA
WBGene00169764	37672	21ur-7374	0.120938	1.9854	6.03707	-0.328867	0.742256	NA
WBGene00170906	24757	21ur-13395	0.120938	1.9854	6.03707	-0.328867	0.742256	NA
WBGene00171274	38999	21ur-5530	0.120938	1.9854	6.03707	-0.328867	0.742256	NA
WBGene00194834	25017	H06H21.36	0.120938	1.9854	6.03707	-0.328867	0.742256	NA
WBGene00195365	25059	F45E4.15	0.120938	1.9854	6.03707	-0.328867	0.742256	NA
WBGene00195543	25097	W06H8.9	0.120938	1.9854	6.03707	-0.328867	0.742256	NA
WBGene00196137	16300	T18H9.8	0.120938	1.9854	6.03707	-0.328867	0.742256	NA
WBGene00196755	43160	F29G6.4	0.120938	1.9854	6.03707	-0.328867	0.742256	NA
WBGene00196998	22902	F21A3.9	0.120938	1.9854	6.03707	-0.328867	0.742256	NA
WBGene00198337	21376	T05G5.14	0.120938	1.9854	6.03707	-0.328867	0.742256	NA
WBGene00198727	44264	Y23H5A.10	0.120938	1.9854	6.03707	-0.328867	0.742256	NA
WBGene00199070	44455	C34G6.10	0.120938	1.9854	6.03707	-0.328867	0.742256	NA
WBGene00199397	25811	M110.12	0.120938	1.9854	6.03707	-0.328867	0.742256	NA
WBGene00199531	44720	C36F7.19	0.120938	1.9854	6.03707	-0.328867	0.742256	NA
WBGene00200056	45022	F58E6.15	0.120938	1.9854	6.03707	-0.328867	0.742256	NA
WBGene00200753	26067	F48D6.5	0.120938	1.9854	6.03707	-0.328867	0.742256	NA
WBGene00200925	45519	H13N06.11	0.120938	1.9854	6.03707	-0.328867	0.742256	NA
WBGene00201802	46019	Y80D3A.15	0.120938	1.9854	6.03707	-0.328867	0.742256	NA
WBGene00201984	26285	Y42H9B.10	0.120938	1.9854	6.03707	-0.328867	0.742256	NA
WBGene00202010	26290	C09B8.18	0.120938	1.9854	6.03707	-0.328867	0.742256	NA
WBGene00202066	17426	F56F3.14	0.120938	1.9854	6.03707	-0.328867	0.742256	NA
WBGene00202191	46229	C28G1.9	0.120938	1.9854	6.03707	-0.328867	0.742256	NA
WBGene00202399	46354	T22E6.1	0.120938	1.9854	6.03707	-0.328867	0.742256	NA
WBGene00219220	46426	mir-5549	0.120938	1.9854	6.03707	-0.328867	0.742256	NA
WBGene00219301	46452	C44C10.15	0.120938	1.9854	6.03707	-0.328867	0.742256	NA
WBGene00255563	19955	mir-2217.2	0.120938	1.9854	6.03707	-0.328867	0.742256	NA
WBGene00005854	26775	srw-107	0.259008	1.9854	6.03707	-0.328867	0.742256	NA
WBGene00006142	26973	str-83	0.259008	1.9854	6.03707	-0.328867	0.742256	NA
WBGene00011621	22116	T08G3.13	0.259008	1.9854	6.03707	-0.328867	0.742256	NA
WBGene00198488	23445	ZC513.17	0.259008	1.9854	6.03707	-0.328867	0.742256	NA
WBGene00023343	24022	T06A1.6	0.21998	1.9854	6.03707	-0.328867	0.742256	NA
WBGene00166331	21840	21ur-9108	0.21998	1.9854	6.03707	-0.328867	0.742256	NA
WBGene00023356	24023	W03F9.8	0.23913	1.9854	6.03707	-0.328867	0.742256	NA
WBGene00197183	19889	F55C10.9	0.228249	1.9854	6.03707	-0.328867	0.742256	NA
WBGene00202050	46155	M79.15	0.228249	1.9854	6.03707	-0.328867	0.742256	NA
WBGene00206375	46412	T08B6.64	0.228249	1.9854	6.03707	-0.328867	0.742256	NA
WBGene00014676	23633	C12D8.7	0.319021	1.9854	6.03707	-0.328867	0.742256	NA
WBGene00006182	16525	str-134	0.316323	1.9854	6.03707	-0.328867	0.742256	NA
WBGene00019919	27871	R07C3.3	0.335561	1.9854	6.03707	-0.328867	0.742256	NA
WBGene00005056	26590	sra-30	0.317672	1.9854	6.03707	-0.328867	0.742256	NA
WBGene00020454	23883	fbxa-56	0.330305	1.9854	6.03707	-0.328867	0.742256	NA
WBGene00005462	21011	srh-256	0.336823	1.9854	6.03707	-0.328867	0.742256	NA
WBGene00023195	24001	Y82E9BR.t1	0.343823	1.9854	6.03707	-0.328867	0.742256	NA
WBGene00003332	22981	mir-239.1	0.353862	1.9854	6.03707	-0.328867	0.742256	NA
WBGene00050931	18876	F59B2.14	0.353862	1.9854	6.03707	-0.328867	0.742256	NA
WBGene00006011	16017	srx-120	0.368673	1.9854	6.03707	-0.328867	0.742256	NA
WBGene00173766	16263	21ur-10725	0.385288	1.9854	6.03707	-0.328867	0.742256	NA
WBGene00019676	23857	irld-46	0.416713	1.9854	6.03707	-0.328867	0.742256	NA
WBGene00005229	19980	srh-3	0.421479	1.9854	6.03707	-0.328867	0.742256	NA
WBGene00001920	15976	his-46	0.429364	1.9854	6.03707	-0.328867	0.742256	NA
WBGene00169990	37871	21ur-12928	0.669637	1.9854	6.03707	-0.328867	0.742256	NA
WBGene00174172	41524	21ur-12437	0.189973	1.9854	6.03707	-0.328867	0.742256	NA
WBGene00169496	37447	21ur-5726	0.170459	1.9854	6.03707	-0.328867	0.742256	NA
WBGene00171536	20253	21ur-6408	0.170459	1.9854	6.03707	-0.328867	0.742256	NA
WBGene00021477	27922	srbc-64	0.169784	1.9854	6.03707	-0.328867	0.742256	NA
WBGene00200683	18923	C09G5.11	0.169784	1.9854	6.03707	-0.328867	0.742256	NA
WBGene00174148	41505	21ur-9717	0.180034	1.9854	6.03707	-0.328867	0.742256	NA
WBGene00173607	41034	21ur-13391	0.183745	1.9854	6.03707	-0.328867	0.742256	NA
WBGene00199557	13430	K01F9.7	0.173284	1.9854	6.03707	-0.328867	0.742256	NA
WBGene00077754	24463	Y116A8C.199	0.18571	1.9854	6.03707	-0.328867	0.742256	NA
WBGene00196263	25235	R08E3.6	0.18571	1.9854	6.03707	-0.328867	0.742256	NA
WBGene00197900	14415	M01A10.7	0.18571	1.9854	6.03707	-0.328867	0.742256	NA
WBGene00047691	30475	21ur-1359	0.215542	1.9854	6.03707	-0.328867	0.742256	NA
WBGene00174084	24947	21ur-13378	0.215542	1.9854	6.03707	-0.328867	0.742256	NA
WBGene00198073	43915	K08A8.14	0.215542	1.9854	6.03707	-0.328867	0.742256	NA
WBGene00202227	7470	C03H12.3	0.215542	1.9854	6.03707	-0.328867	0.742256	NA
WBGene00196376	14406	K02D10.7	0.229332	1.9854	6.03707	-0.328867	0.742256	NA
WBGene00174040	16822	21ur-6448	0.22213	1.9854	6.03707	-0.328867	0.742256	NA
WBGene00166887	35105	21ur-6927	0.23238	1.9854	6.03707	-0.328867	0.742256	NA
WBGene00195421	17363	T25F10.7	0.236091	1.9854	6.03707	-0.328867	0.742256	NA
WBGene00268214	12961	C49F5.12	0.280314	1.9854	6.03707	-0.328867	0.742256	NA
WBGene00011356	27174	lgc-15	0.372164	1.9854	6.03707	-0.328867	0.742256	NA
WBGene00200506	45278	ZC123.9	0.282786	1.9854	6.03707	-0.328867	0.742256	NA
WBGene00199822	25900	F20D1.18	0.380024	1.9854	6.03707	-0.328867	0.742256	NA
WBGene00198705	44251	C34D1.11	0.273635	1.9854	6.03707	-0.328867	0.742256	NA
WBGene00050148	32674	21ur-5321	0.284717	1.9854	6.03707	-0.328867	0.742256	NA
WBGene00173188	24898	21ur-7501	0.268392	1.9854	6.03707	-0.328867	0.742256	NA
WBGene00199471	16368	C17G10.11	0.294665	1.9854	6.03707	-0.328867	0.742256	NA
WBGene00197063	18390	F55A12.12	0.295187	1.9854	6.03707	-0.328867	0.742256	NA
WBGene00197398	43517	F29F11.9	0.300207	1.9854	6.03707	-0.328867	0.742256	NA
WBGene00200598	14931	C07G2.4	0.283643	1.9854	6.03707	-0.328867	0.742256	NA
WBGene00018053	18735	srbc-3	0.394461	1.9854	6.03707	-0.328867	0.742256	NA
WBGene00196236	25229	M03F4.9	0.355734	1.9854	6.03707	-0.328867	0.742256	NA
WBGene00005236	21502	srh-10	0.497776	1.9854	6.03707	-0.328867	0.742256	NA
WBGene00014827	27638	T01B7.1	0.379843	1.9854	6.03707	-0.328867	0.742256	NA
WBGene00173099	40590	21ur-11208	0.363691	1.9854	6.03707	-0.328867	0.742256	NA
WBGene00196204	21879	B0379.9	0.331632	1.9854	6.03707	-0.328867	0.742256	NA
WBGene00006113	18541	str-48	0.477159	1.9854	6.03707	-0.328867	0.742256	NA
WBGene00219814	7978	C14A11.14	0.328989	1.9854	6.03707	-0.328867	0.742256	NA
WBGene00219876	21443	F01G12.19	0.478786	1.9854	6.03707	-0.328867	0.742256	NA
WBGene00196937	21359	T01C1.8	0.551432	1.9854	6.03707	-0.328867	0.742256	NA
WBGene00049326	31928	21ur-1588	0.416464	1.9854	6.03707	-0.328867	0.742256	NA
WBGene00220252	17449	C02F4.12	0.435483	1.9854	6.03707	-0.328867	0.742256	NA
WBGene00023247	20144	C33E10.7	0.561372	1.9854	6.03707	-0.328867	0.742256	NA
WBGene00009425	9143	scl-16	0.484716	1.9854	6.03707	-0.328867	0.742256	NA
WBGene00005565	26704	sri-53	0.582826	1.9854	6.03707	-0.328867	0.742256	NA
WBGene00202080	19922	C10F3.16	0.484399	1.9854	6.03707	-0.328867	0.742256	NA
WBGene00006161	17036	str-109	0.589845	1.9854	6.03707	-0.328867	0.742256	NA
WBGene00009032	27100	bgnt-1.3	0.643707	1.9854	6.03707	-0.328867	0.742256	NA
WBGene00013565	23559	Y75B8A.37	0.212112	1.9854	6.03707	-0.328867	0.742256	NA
WBGene00018884	27836	F55E10.5	0.212112	1.9854	6.03707	-0.328867	0.742256	NA
WBGene00008947	20030	srz-16	0.21863	1.9854	6.03707	-0.328867	0.742256	NA
WBGene00013519	27275	Y73F8A.10	0.21863	1.9854	6.03707	-0.328867	0.742256	NA
WBGene00199435	44664	ZK669.8	0.21863	1.9854	6.03707	-0.328867	0.742256	NA
WBGene00195850	11928	F57C7.7	0.246551	1.9854	6.03707	-0.328867	0.742256	NA
WBGene00016232	23722	srt-4	0.250481	1.9854	6.03707	-0.328867	0.742256	NA
WBGene00173857	41248	21ur-5698	0.250481	1.9854	6.03707	-0.328867	0.742256	NA
WBGene00005068	23009	srb-3	0.310147	1.9854	6.03707	-0.328867	0.742256	NA
WBGene00012725	23533	sre-47	0.310147	1.9854	6.03707	-0.328867	0.742256	NA
WBGene00047252	21270	21ur-3353	0.310147	1.9854	6.03707	-0.328867	0.742256	NA
WBGene00197186	25411	C05G5.9	0.321132	1.9854	6.03707	-0.328867	0.742256	NA
WBGene00001900	22971	his-26	0.316804	1.9854	6.03707	-0.328867	0.742256	NA
WBGene00199627	44779	K03C7.10	0.374788	1.9854	6.03707	-0.328867	0.742256	NA
WBGene00005555	21510	sri-43	0.526189	1.9854	6.03707	-0.328867	0.742256	NA
WBGene00005051	23006	sra-25	0.319424	1.9854	6.03707	-0.328867	0.742256	NA
WBGene00011565	15638	nhr-272	0.319424	1.9854	6.03707	-0.328867	0.742256	NA
WBGene00201256	20881	K03H9.14	0.319424	1.9854	6.03707	-0.328867	0.742256	NA
WBGene00006108	23238	str-43	0.348173	1.9854	6.03707	-0.328867	0.742256	NA
WBGene00005515	23116	sri-3	0.414839	1.9854	6.03707	-0.328867	0.742256	NA
WBGene00016881	23758	C52E2.2	0.414839	1.9854	6.03707	-0.328867	0.742256	NA
WBGene00197269	20342	F59C12.8	0.794678	1.9854	6.03707	-0.328867	0.742256	NA
WBGene00174977	24991	21ur-12612	0.38941	1.9854	6.03707	-0.328867	0.742256	NA
WBGene00005380	93	srh-164	0.443522	1.9854	6.03707	-0.328867	0.742256	NA
WBGene00173337	40796	21ur-14376	0.167613	1.9854	6.03707	-0.328867	0.742256	NA
WBGene00198341	25619	F42C5.13	0.167613	1.9854	6.03707	-0.328867	0.742256	NA
WBGene00045936	24164	21ur-5171	0.258787	1.9854	6.03707	-0.328867	0.742256	NA
WBGene00196720	22901	ZC247.5	0.265306	1.9854	6.03707	-0.328867	0.742256	NA
WBGene00047053	24232	21ur-594	0.32858	1.9854	6.03707	-0.328867	0.742256	NA
WBGene00023480	20152	srz-68	0.372617	1.9854	6.03707	-0.328867	0.742256	NA
WBGene00169669	37589	21ur-5982	0.328112	1.9854	6.03707	-0.328867	0.742256	NA
WBGene00199139	44489	W08F4.17	0.408585	1.9854	6.03707	-0.328867	0.742256	NA
WBGene00005335	23067	srh-116	0.419612	1.9854	6.03707	-0.328867	0.742256	NA
WBGene00006270	27013	str-243	0.740877	1.9854	6.03707	-0.328867	0.742256	NA
WBGene00047618	20184	21ur-3317	0.260166	1.9854	6.03707	-0.328867	0.742256	NA
WBGene00219371	46457	C03G5.14	0.324702	1.9854	6.03707	-0.328867	0.742256	NA
WBGene00196424	25274	F54E4.8	0.360723	1.9854	6.03707	-0.328867	0.742256	NA
WBGene00195358	20284	B0507.13	0.439688	1.9854	6.03707	-0.328867	0.742256	NA
WBGene00014782	23650	F59A1.t2	0.3216	1.98539	6.03707	-0.328867	0.742256	NA
WBGene00199935	25923	F13E6.10	0.419292	1.98539	6.03707	-0.328867	0.742256	NA
WBGene00010602	23401	nhr-197	0.633915	1.98539	6.03707	-0.328867	0.742256	NA
WBGene00235260	15959	T05C7.7	0.68757	1.98539	6.03707	-0.328867	0.742256	NA
WBGene00005966	19540	srx-75	0.451143	1.98539	6.03707	-0.328867	0.742256	NA
WBGene00010020	21082	srbc-48	0.555365	1.98539	6.03707	-0.328867	0.742256	NA
WBGene00202322	16438	T23G5.11	0.563675	1.98539	6.03707	-0.328867	0.742256	NA
WBGene00022526	23954	ZC132.8	0.758706	1.98539	6.03707	-0.328867	0.742256	NA
WBGene00195386	13908	T09E8.6	0.260964	1.98539	6.03707	-0.328867	0.742256	NA
WBGene00196184	25222	C10E2.8	0.260964	1.98539	6.03707	-0.328867	0.742256	NA
WBGene00195731	20752	C49F8.6	0.368906	1.98539	6.03707	-0.328867	0.742256	NA
WBGene00005584	9581	sri-72	0.47443	1.98539	6.03707	-0.328867	0.742256	NA
WBGene00077708	20215	mir-1817	0.550273	1.98539	6.03707	-0.328867	0.742256	NA
WBGene00195735	42597	ZK185.6	0.307639	1.98539	6.03707	-0.328867	0.742256	NA
WBGene00010802	23405	srsx-39	0.555374	1.98539	6.03707	-0.328867	0.742256	NA
WBGene00194868	42304	M03C11.9	0.353226	1.98539	6.03707	-0.328867	0.742256	NA
WBGene00018093	8805	F36F12.2	0.603119	1.98539	6.03707	-0.328867	0.742256	NA
WBGene00020241	27882	T05B4.10	0.601296	1.98539	6.03707	-0.328867	0.742256	NA
WBGene00022565	23957	ZC239.2	0.581418	1.98539	6.03707	-0.328867	0.742256	NA
WBGene00005264	19523	srh-41	0.690461	1.98539	6.03707	-0.328867	0.742256	NA
WBGene00015888	27730	C17C3.2	0.417695	1.98539	6.03707	-0.328867	0.742256	NA
WBGene00005302	15035	srh-81	0.497086	1.98539	6.03707	-0.328867	0.742256	NA
WBGene00012075	20055	T27A8.3	0.338757	1.98539	6.03707	-0.328867	0.742256	NA
WBGene00001754	28	gst-6	1294.43	1.98289	0.157426	-12.5957	2.2297e-36	1.0999e-33
WBGene00006627	9599	tsp-1	493.079	1.98259	0.543035	-3.65094	0.000261287	0.0048763
WBGene00021234	22311	irld-16	5.86643	1.97549	1.38155	-1.42991	0.152743	0.497812
WBGene00022066	23946	Y67D8C.2	1.46829	1.97412	2.51341	-0.785435	0.432199	NA
WBGene00008483	148	E04D5.4	199.742	1.97245	0.320218	-6.15971	7.28763e-10	4.70014e-08
WBGene00219696	7977	anr-39	36.0474	1.97152	0.806836	-2.44352	0.0145449	0.114703
WBGene00044492	2956	Y54G2A.49	38.5326	1.96989	0.636959	-3.09265	0.0019838	0.0259
WBGene00005095	16502	srd-17	3.31908	1.96821	2.25862	-0.871423	0.383523	0.759398
WBGene00008618	20026	fbxa-45	1.56159	1.96747	2.93935	-0.669357	0.503268	NA
WBGene00018640	13782	F49E10.2	25.9973	1.96599	0.944148	-2.08229	0.0373162	0.214267
WBGene00007875	131	dod-24	1397.57	1.96521	0.254929	-7.70885	1.26959e-14	1.46661e-12
WBGene00022320	14336	Y82E9BL.3	7.73345	1.96456	1.38809	-1.4153	0.156979	0.504434
WBGene00173534	15393	21ur-14956	0.891491	1.96434	3.33216	-0.589509	0.55552	NA
WBGene00017819	18207	F26D11.2	10.8131	1.96379	1.45661	-1.3482	0.177595	0.53463
WBGene00000430	13482	ceh-5	6.31015	1.95873	1.29939	-1.50743	0.131701	0.460148
WBGene00164973	9434	C39B10.7	11.8983	1.95723	1.14916	-1.70317	0.0885354	0.366466
WBGene00019232	364	ugt-13	1750.18	1.9553	0.141719	-13.7971	2.65437e-43	2.30702e-40
WBGene00017475	4830	F14H12.8	88.9414	1.95103	0.380397	-5.12892	2.91408e-07	1.19255e-05
WBGene00016301	14225	fbxc-6	11.1204	1.95075	1.11499	-1.74956	0.0801939	0.345734
WBGene00195600	25106	K08H10.14	1.38284	1.94955	3.09752	-0.62939	0.529094	NA
WBGene00009586	5158	F40F9.10	38.1165	1.94837	0.630487	-3.09025	0.00199986	0.0260539
WBGene00006103	20003	str-38	0.827246	1.947	5.89741	-0.330146	0.74129	NA
WBGene00202101	26310	Y39A3CR.10	0.685562	1.94567	4.47963	-0.434336	0.664045	NA
WBGene00022588	12356	ZC317.2	17.9433	1.94555	0.964259	-2.01766	0.0436267	0.237929
WBGene00044074	15348	mltn-5	3.69353	1.94295	1.53405	-1.26655	0.205316	0.57239
WBGene00020853	5888	fbxa-137	9.72611	1.9427	1.10455	-1.75882	0.0786084	0.341935
WBGene00010762	15129	K10H10.6	1.66927	1.93801	2.37238	-0.816904	0.413983	NA
WBGene00015264	18701	B0563.7	45.4279	1.93562	0.490203	-3.94861	7.86055e-05	0.00178891
WBGene00009518	1669	clec-166	560.568	1.93555	0.199876	-9.68375	3.53494e-22	8.37918e-20
WBGene00044287	4443	F21H12.7	19.0824	1.93533	0.752988	-2.5702	0.0101639	0.0883392
WBGene00020872	23897	T28A11.5	10.0513	1.93454	1.17252	-1.64989	0.0989644	0.390045
WBGene00012549	21107	Y37D8A.8	27.1054	1.9341	0.920149	-2.10194	0.0355586	0.208018
WBGene00167133	35328	21ur-11173	0.959567	1.93376	4.93937	-0.391498	0.695429	NA
WBGene00017434	1330	F13H8.1	156.245	1.93347	0.321956	-6.00539	1.90868e-09	1.15379e-07
WBGene00012598	12174	Y38E10A.20	19.2584	1.92855	0.72056	-2.67646	0.00744046	0.0702916
WBGene00167544	19851	21ur-12587	1.82256	1.92452	2.24673	-0.856588	0.391673	NA
WBGene00172287	24841	21ur-12247	1.2629	1.92435	3.04106	-0.632789	0.526872	NA
WBGene00018354	840	F42G2.5	259.116	1.92428	0.320427	-6.00536	1.90908e-09	1.15379e-07
WBGene00017264	22727	F08F3.8	46.602	1.9193	0.682197	-2.81341	0.00490197	0.0523527
WBGene00005346	18022	srh-129	4.43374	1.91903	1.76241	-1.08887	0.276213	0.658025
WBGene00000483	16973	che-1	2.17598	1.91618	2.37639	-0.806342	0.420046	NA
WBGene00014245	23416	ZK1307.2	27.5055	1.91415	0.903733	-2.11805	0.0341711	0.203289
WBGene00009338	18085	F32G8.2	5.12635	1.91298	1.74868	-1.09396	0.273973	0.655639
WBGene00012939	19648	subs-4	34.2878	1.91104	0.60987	-3.13352	0.00172726	0.0230621
WBGene00010202	4683	F57E7.1	6.52135	1.90951	1.23721	-1.54341	0.122733	0.44271
WBGene00015906	7786	C17E7.13	9.24732	1.9093	1.38032	-1.38323	0.166596	0.520046
WBGene00001711	9008	grl-2	5.07848	1.90807	1.29874	-1.46917	0.141787	0.480945
WBGene00008111	3628	C46C2.3	37.3046	1.90444	0.611906	-3.11231	0.00185629	0.0244982
WBGene00006665	1107	twk-10	23.6897	1.90424	0.714596	-2.66478	0.00770391	0.0719474
WBGene00008905	1151	F17B5.1	40.3939	1.90406	0.707253	-2.69219	0.00709844	0.0682977
WBGene00019145	5363	H02F09.2	2.37676	1.89993	2.81402	-0.675164	0.499571	0.833167
WBGene00008943	15096	srz-36	5.31813	1.89859	1.93901	-0.979154	0.327504	0.713318
WBGene00018211	10304	oac-24	5.90714	1.89683	1.2944	-1.46542	0.142808	0.48297
WBGene00013032	7727	wht-9	17.3056	1.89527	0.887529	-2.13545	0.0327244	0.197842
WBGene00021496	21757	Y40C5A.3	4.17838	1.893	2.12784	-0.889638	0.37366	0.752354
WBGene00012098	21100	fbxb-86	11.8658	1.89102	1.33801	-1.41331	0.157564	0.505246
WBGene00001619	6034	glr-8	14.865	1.89063	0.872609	-2.16664	0.0302623	0.188258
WBGene00016379	809	C33H5.13	747.136	1.88922	0.388419	-4.86387	1.15115e-06	4.16057e-05
WBGene00008495	154	F01D5.5	321.618	1.88763	0.236803	-7.97129	1.57025e-15	1.96303e-13
WBGene00009486	9652	F36G9.7	18.8433	1.87466	0.977715	-1.91739	0.0551885	0.274565
WBGene00012163	256	VZK822L.2	73.2044	1.86857	0.468595	-3.98761	6.67427e-05	0.00155381
WBGene00001858	9013	hil-7	60.7797	1.8682	0.495248	-3.77225	0.000161785	0.00326287
WBGene00013618	27280	fbxa-205	3.12149	1.86803	1.69194	-1.10408	0.26956	0.650595
WBGene00044363	2954	F22E5.21	21.1481	1.86685	0.69634	-2.68095	0.00734139	0.0696802
WBGene00003938	5547	pax-2	4.84641	1.86649	1.77164	-1.05354	0.292094	0.674022
WBGene00004011	4564	pha-2	9.44248	1.86609	0.957973	-1.94795	0.0514205	0.263483
WBGene00021151	6406	Y4C6A.1	12.8862	1.86574	1.02975	-1.81184	0.0700109	0.317239
WBGene00195157	15405	C12D8.21	5.12822	1.8653	1.43903	-1.29622	0.194901	0.558451
WBGene00008397	7633	D2005.1	14.5803	1.86203	1.00486	-1.85302	0.063879	0.300177
WBGene00007368	13582	C06B8.2	136.706	1.86055	0.387323	-4.80363	1.55816e-06	5.47968e-05
WBGene00007289	21529	C04B4.1	6.71871	1.85942	1.24576	-1.4926	0.135541	0.468187
WBGene00012011	15151	T25B9.5	17.8201	1.85888	0.841296	-2.20955	0.0271365	0.17545
WBGene00014046	21650	clec-60	15.8382	1.8587	1.33231	-1.3951	0.162985	0.514225
WBGene00007800	7627	C29A12.6	8.59531	1.85841	1.01794	-1.82565	0.0679027	0.310772
WBGene00001734	6037	grl-25	6.51712	1.8533	1.97035	-0.940596	0.346912	0.730147
WBGene00021518	408	hpo-6	2054.26	1.84955	0.203683	-9.08057	1.08012e-19	2.05358e-17
WBGene00015537	2290	C06E4.8	72.5065	1.84848	0.369936	-4.99675	5.83057e-07	2.24041e-05
WBGene00019550	7345	K09C4.5	391.076	1.84823	0.286931	-6.44139	1.18383e-10	8.5404e-09
WBGene00015706	6298	C12D5.3	16.9692	1.84573	0.73353	-2.51623	0.0118617	0.0980081
WBGene00000598	12480	col-9	0.693318	1.8442	5.89889	-0.312636	0.754558	NA
WBGene00023455	17819	mir-358	1.6235	1.83784	2.41743	-0.760244	0.447109	NA
WBGene00220167	6979	Y47G6A.38	1.68186	1.8378	2.28518	-0.804226	0.421266	NA
WBGene00044505	11879	D2024.10	3.36152	1.83654	2.18232	-0.841555	0.400037	0.772151
WBGene00009049	166	F22B8.7	2281.64	1.83623	0.133271	-13.7782	3.44725e-43	2.85996e-40
WBGene00007460	120	C08F11.13	3345.49	1.83323	0.199778	-9.17632	4.46064e-20	8.75437e-18
WBGene00006146	21034	str-87	10.5299	1.83288	0.880581	-2.08144	0.0373933	0.214556
WBGene00020870	19769	T28A11.3	42.0748	1.82906	0.655813	-2.789	0.0052871	0.0552429
WBGene00010314	2178	F59B2.12	31.9239	1.82519	1.16183	-1.57096	0.116193	0.431568
WBGene00011472	16603	T05C12.9	7.31275	1.82511	1.59988	-1.14078	0.253962	0.634539
WBGene00018747	14746	F53C3.3	11.7568	1.82386	0.887356	-2.05538	0.0398421	0.223547
WBGene00016848	818	klo-1	1364.97	1.8196	0.136571	-13.3235	1.69038e-40	1.18665e-37
WBGene00019177	18760	H10D18.1	19.8253	1.81649	0.780977	-2.32592	0.020023	0.142535
WBGene00001075	9000	dpy-14	290.081	1.81491	0.396746	-4.57449	4.77373e-06	0.000151005
WBGene00019906	11808	R05G9R.1	24.9848	1.8143	0.673839	-2.69248	0.00709222	0.0682977
WBGene00009578	185	F40F8.5	14443.8	1.8128	0.17188	-10.5469	5.24896e-26	1.68077e-23
WBGene00022314	926	Y77E11A.14	121.01	1.81109	0.396705	-4.56534	4.98683e-06	0.000156123
WBGene00268206	15463	F54E2.9	1.5517	1.81075	3.33461	-0.543017	0.587118	NA
WBGene00020602	16713	T20B12.4	1.86546	1.80914	3.27686	-0.552096	0.580882	NA
WBGene00006954	5592	wrt-8	18.6	1.80572	1.14831	-1.57249	0.115836	0.431037
WBGene00009839	690	fbxa-188	137.101	1.80467	0.325296	-5.54778	2.89312e-08	1.45069e-06
WBGene00011979	742	T24B8.5	1415.77	1.79869	0.276188	-6.51254	7.38908e-11	5.55002e-09
WBGene00013091	760	Y51B9A.9	114.335	1.79646	0.323341	-5.55594	2.76117e-08	1.39218e-06
WBGene00008553	156	F07C6.2	111.181	1.79508	0.407843	-4.40139	1.07559e-05	0.000311119
WBGene00007085	17549	AH10.4	3.58822	1.79289	1.8444	-0.972073	0.331014	0.716177
WBGene00018907	12279	F55G1.15	340.736	1.79233	0.284756	-6.29427	3.08848e-10	2.13526e-08
WBGene00008678	1653	stdh-2	17.7005	1.7919	0.905242	-1.97947	0.0477634	0.25133
WBGene00021911	18822	Y55B1BR.1	1.86358	1.79035	2.74752	-0.651623	0.514644	NA
WBGene00016855	12240	C50H11.8	5.65173	1.78465	1.85619	-0.961461	0.336321	0.72047
WBGene00001069	10492	dpy-7	124.788	1.78446	0.456401	-3.90986	9.23495e-05	0.00205056
WBGene00007567	21051	C14A6.3	0.794401	1.77714	5.89991	-0.301215	0.763251	NA
WBGene00017315	1822	ugt-36	44.262	1.775	0.494514	-3.58938	0.000331462	0.00600778
WBGene00015933	302	C17H12.8	9236.38	1.77275	0.25839	-6.86074	6.85071e-12	5.76217e-10
WBGene00022744	15334	ZK470.1	4.71999	1.77065	1.55873	-1.13596	0.255973	0.636609
WBGene00006213	19545	str-169	2.8448	1.76981	2.63603	-0.671393	0.50197	0.834803
WBGene00015626	9764	C09B9.1	19.698	1.76807	0.76446	-2.31284	0.0207317	0.146381
WBGene00045125	18864	F54C9.12	0.876483	1.76759	3.92101	-0.450799	0.652134	NA
WBGene00269389	13969	C08F1.12	3.52803	1.76694	1.87266	-0.943547	0.345401	0.729062
WBGene00009411	9142	F35E2.3	3.73842	1.76633	1.78417	-0.989999	0.322174	0.707641
WBGene00000445	3504	ceh-22	25.6362	1.76444	0.683347	-2.58206	0.00982125	0.0860986
WBGene00008798	14595	F14D7.11	2.58304	1.7644	2.52753	-0.698074	0.485131	0.82446
WBGene00022417	22823	Y102A11A.7	30.5824	1.76148	0.657359	-2.67962	0.0073705	0.0698476
WBGene00005727	6576	srv-16	1.59206	1.76113	3.28251	-0.536521	0.591599	NA
WBGene00009019	8636	F21D9.5	14.2757	1.76076	1.11207	-1.58332	0.11335	0.424817
WBGene00269387	17959	btb-22	3.15533	1.75935	2.20498	-0.797901	0.424928	0.78775
WBGene00008875	12588	F15H10.8	8.03581	1.75872	1.37804	-1.27625	0.201867	0.567716
WBGene00077762	13378	Y57G11C.499	10.5809	1.75811	1.25783	-1.39773	0.162193	0.512704
WBGene00011175	20051	R09E10.5	58.2161	1.75741	0.473995	-3.70765	0.000209191	0.00407922
WBGene00020329	385	bath-26	53.5173	1.75666	0.594208	-2.95631	0.00311343	0.0368878
WBGene00235312	23452	F28A12.10	5.04328	1.75405	1.57914	-1.11076	0.266672	0.646789
WBGene00009429	176	irg-5	424.506	1.7523	0.311703	-5.62168	1.89112e-08	9.9186e-07
WBGene00022024	14809	Y64H9A.2	9.78672	1.7514	1.31344	-1.33345	0.182384	0.541024
WBGene00011245	23468	R11D1.4	1.72595	1.75123	2.57149	-0.681017	0.49586	NA
WBGene00008647	18078	F10C2.7	7.15202	1.75093	1.3725	-1.27572	0.202053	0.567928
WBGene00268209	10473	T04B8.6	3.47519	1.75029	2.08868	-0.837987	0.402038	0.773643
WBGene00021447	7376	Y39A3CR.8	8.5488	1.74902	1.35422	-1.29153	0.196518	0.560708
WBGene00010017	7662	nhr-282	1.33632	1.74893	3.01031	-0.580979	0.561255	NA
WBGene00044183	8419	F09C6.13	5.57365	1.74832	1.28338	-1.36228	0.173109	0.52823
WBGene00044168	16762	M05D6.10	3.24352	1.74308	2.00529	-0.869238	0.384717	0.760207
WBGene00005832	96	srw-85	53.2242	1.74147	0.555644	-3.13415	0.00172354	0.0230464
WBGene00013873	20070	ZC376.1	25.8718	1.74044	0.600177	-2.89987	0.00373313	0.042506
WBGene00017296	17706	F09E10.6	6.00542	1.73994	1.8023	-0.9654	0.334344	0.718983
WBGene00044905	11885	T26E3.11	10.6519	1.73855	1.16938	-1.48673	0.137086	0.471114
WBGene00015199	23682	B0454.8	4.9771	1.73709	1.94136	-0.894779	0.370905	0.750361
WBGene00077535	5955	F15H9.7	2.55347	1.73591	2.21471	-0.783809	0.433152	0.790985
WBGene00012412	22642	Y7A5A.6	51.6197	1.73569	0.543345	-3.19444	0.00140101	0.0195798
WBGene00018507	15258	F46F5.16	3.52221	1.73332	1.9033	-0.910694	0.362456	0.742367
WBGene00003377	9548	mls-2	20.6093	1.7327	0.708992	-2.44389	0.0145298	0.114678
WBGene00012027	2750	fbxa-127	49.7387	1.72961	0.467899	-3.69654	0.00021856	0.00422581
WBGene00008097	13084	ugt-15	176.713	1.72874	0.459067	-3.76577	0.000166033	0.00333749
WBGene00006554	23280	tbx-35	3.27226	1.72728	1.98626	-0.869616	0.38451	0.760113
WBGene00019617	370	K10C2.1	20824.3	1.72418	0.469448	-3.67278	0.000239927	0.00456161
WBGene00194886	4966	C05B5.12	3.33102	1.724	2.12242	-0.812281	0.41663	0.783761
WBGene00009849	7659	F48F7.3	2.70676	1.72395	2.66141	-0.64776	0.51714	0.842749
WBGene00018630	18748	F49D11.6	4.64559	1.71732	1.49929	-1.14542	0.252034	0.63258
WBGene00198538	21899	H14E04.7	1.87645	1.71715	2.23752	-0.767433	0.442824	NA
WBGene00012328	21626	W07G1.1	2.371	1.71698	2.82396	-0.608004	0.543185	0.856468
WBGene00001618	4526	glr-7	16.1042	1.71594	0.932811	-1.83953	0.0658369	0.305066
WBGene00019386	7343	irld-42	3.60854	1.71427	1.99967	-0.85728	0.39129	0.765125
WBGene00206378	46413	C14E2.11	3.25666	1.71408	2.19081	-0.782394	0.433983	0.79158
WBGene00206368	10459	Y39F10C.3	9.41829	1.7125	1.25337	-1.36632	0.171839	0.526146
WBGene00008269	13086	C53A5.11	1.89738	1.71102	2.39225	-0.715234	0.474465	NA
WBGene00050911	15366	Y43F8B.18	3.70954	1.71019	1.95223	-0.876015	0.381022	0.757314
WBGene00219787	26831	B0379.12	1.06184	1.71005	3.75978	-0.454828	0.649233	NA
WBGene00009214	19080	thn-3	1.1654	1.70928	3.77843	-0.45238	0.650995	NA
WBGene00019849	18776	oac-40	3.39168	1.70828	2.10783	-0.810443	0.417686	0.784301
WBGene00018427	343	F44E7.5	6026.17	1.70781	0.126973	-13.4501	3.07299e-41	2.24353e-38
WBGene00012448	1230	cyp-33D3	27.3094	1.70752	0.583598	-2.92584	0.00343526	0.0398858
WBGene00195016	18376	srpr-2.1	10.339	1.70544	1.1338	-1.50418	0.132535	0.461824
WBGene00005437	12547	srh-229	2.52291	1.70465	2.0591	-0.827863	0.407748	0.778321
WBGene00007485	7100	C09G1.3	7.51872	1.70433	1.38043	-1.23463	0.216967	0.589129
WBGene00007310	14074	irld-21	4.71232	1.69463	1.67687	-1.01059	0.312212	0.696552
WBGene00013424	9726	Y66A7A.4	29.1316	1.69279	0.769827	-2.19892	0.0278834	0.178634
WBGene00011053	22623	arrd-12	6.04069	1.69043	1.64386	-1.02833	0.303797	0.68735
WBGene00007411	5602	C07C7.1	8.67972	1.6902	1.08812	-1.55332	0.120347	0.438786
WBGene00014964	17666	Y105E8B.10	2.29211	1.68927	2.04801	-0.824834	0.409466	NA
WBGene00235280	3487	F42A9.17	6.99766	1.68862	1.3311	-1.26859	0.204587	0.571578
WBGene00023106	12358	K11H12.t1	2.87996	1.68744	2.02348	-0.83393	0.40432	0.775742
WBGene00007885	132	ugt-21	918.16	1.68374	0.224635	-7.49544	6.60779e-14	7.13641e-12
WBGene00013207	274	zipt-2.3	567.597	1.68333	0.201694	-8.34595	7.06419e-17	9.99501e-15
WBGene00011649	9196	T09E8.4	2.96913	1.68154	1.67254	-1.00538	0.314714	0.698972
WBGene00219720	18946	linc-2	7.29116	1.68075	1.28401	-1.30898	0.19054	0.551848
WBGene00011486	4705	T05E12.3	900.223	1.68025	0.313053	-5.3673	7.9924e-08	3.62879e-06
WBGene00017200	15716	F07C4.6	7.35179	1.67791	1.12507	-1.49138	0.13586	0.468862
WBGene00172727	24874	21ur-12695	0.530507	1.6769	4.87783	-0.343781	0.731011	NA
WBGene00016025	8759	xbx-4	7.67566	1.67679	1.01914	-1.64529	0.0999093	0.39216
WBGene00011798	246	T16G1.4	352.893	1.67482	0.329924	-5.07638	3.84686e-07	1.54654e-05
WBGene00022665	4430	ZK154.1	91.5518	1.67448	0.482443	-3.47083	0.00051886	0.00875045
WBGene00005929	13052	srx-38	3.20636	1.6743	1.72163	-0.972508	0.330798	0.715915
WBGene00020067	2395	clec-158	6.95304	1.67236	1.83933	-0.909221	0.363234	0.743161
WBGene00005833	620	srw-86	82.9288	1.6713	0.576029	-2.90142	0.00371473	0.0423493
WBGene00008010	12078	C38D9.2	25.3795	1.67119	0.645123	-2.5905	0.00958373	0.0847902
WBGene00019742	374	nhr-202	953.493	1.66908	0.200135	-8.33978	7.44262e-17	1.04494e-14
WBGene00022572	7403	ZC239.14	91.0934	1.66896	0.420757	-3.96656	7.29183e-05	0.00167697
WBGene00018841	13266	F54H5.5	37.1851	1.66843	0.600052	-2.78047	0.00542798	0.0560359
WBGene00007594	22560	lgc-23	14.2549	1.66756	0.936444	-1.78073	0.074956	0.330698
WBGene00016175	11741	C27H5.6	7.2155	1.66594	1.47401	-1.13021	0.258387	0.638973
WBGene00011096	12140	R07B7.12	3.26783	1.66554	1.69949	-0.980027	0.327073	0.712634
WBGene00000783	14	cpr-3	2688.98	1.66487	0.472782	-3.52143	0.000429223	0.00744694
WBGene00013410	18676	fbxb-94	16.3121	1.6647	0.76513	-2.17571	0.0295767	0.185754
WBGene00017634	22238	F20D6.2	4.2643	1.66283	1.49113	-1.11514	0.264789	0.644103
WBGene00019594	14762	K09H9.1	8.36628	1.66272	1.14852	-1.4477	0.147701	0.490064
WBGene00044460	13355	Y55F3C.10	14.1747	1.66166	0.781508	-2.12623	0.0334844	0.201228
WBGene00006636	4597	tsp-10	627.162	1.66011	0.261965	-6.33713	2.34081e-10	1.63071e-08
WBGene00020698	1896	T22F3.8	60.0988	1.65797	0.51957	-3.19104	0.00141763	0.0197667
WBGene00000907	517	daf-11	41.6612	1.65621	0.544939	-3.03926	0.00237161	0.0300408
WBGene00015828	14215	math-14	393.235	1.65587	0.29797	-5.55719	2.74146e-08	1.38607e-06
WBGene00012320	8220	srxa-3	6.96845	1.65526	1.47275	-1.12392	0.261047	0.640342
WBGene00020927	13820	W02B3.7	3.7472	1.65485	1.55166	-1.0665	0.286196	0.667532
WBGene00007560	7102	C14A4.9	33.5877	1.65411	0.821737	-2.01295	0.0441202	0.239525
WBGene00050397	16785	21ur-2124	7.26794	1.6499	1.47202	-1.12084	0.262357	0.641465
WBGene00003644	6547	nhr-54	64.4661	1.64877	0.526447	-3.13188	0.00173691	0.0231571
WBGene00077438	7441	C18D4.10	9.72355	1.64751	1.08249	-1.52196	0.128019	0.453307
WBGene00015116	782	pacs-1	3467.42	1.6465	0.0909394	-18.1055	2.88354e-73	5.84783e-70
WBGene00000695	13983	col-121	24.5846	1.64569	0.828241	-1.98697	0.0469254	0.248472
WBGene00021872	416	clec-85	1629.32	1.6409	0.292111	-5.61739	1.93867e-08	1.01389e-06
WBGene00018479	15256	otpl-6	9.49965	1.63972	0.99632	-1.64578	0.0998095	0.391958
WBGene00019901	15275	R05G6.9	10.2374	1.63937	1.18233	-1.38656	0.165577	0.518372
WBGene00044232	9412	C18D11.7	40.1788	1.63874	0.522488	-3.13642	0.00171024	0.0229187
WBGene00019471	368	cyp-35B2	9.75039	1.63586	2.11259	-0.774339	0.43873	0.794494
WBGene00015380	7259	C03B1.10	0.984769	1.63481	3.21168	-0.50902	0.610738	NA
WBGene00020954	392	W02G9.4	1448.01	1.6332	0.264137	-6.18314	6.28375e-10	4.11079e-08
WBGene00018237	835	irg-7	40210.4	1.63115	0.304538	-5.35614	8.50178e-08	3.83147e-06
WBGene00008319	5624	C54G10.1	15.3234	1.63031	0.974251	-1.6734	0.0942494	0.379379
WBGene00014730	8737	F01D5.4	5.8058	1.62867	1.14746	-1.41937	0.155792	0.502654
WBGene00050899	6453	T10C6.15	377.165	1.62862	0.364359	-4.46982	7.82859e-06	0.000234626
WBGene00020579	390	T19D12.4	9236.94	1.62827	0.294992	-5.51972	3.39542e-08	1.68406e-06
WBGene00007358	19051	lact-6	252.969	1.62736	0.529656	-3.07249	0.00212281	0.027401
WBGene00018174	339	F38B6.4	2684.35	1.62629	0.188934	-8.60772	7.45265e-18	1.22546e-15
WBGene00010686	13651	K08F9.3	47.4056	1.62487	0.521659	-3.11481	0.00184063	0.0243266
WBGene00010745	3209	dod-17	411.417	1.62474	0.177962	-9.12968	6.87001e-20	1.33395e-17
WBGene00015945	22202	C18A3.9	4.70012	1.62193	1.35778	-1.19455	0.232264	0.608732
WBGene00206356	4977	T08B2.15	13.6263	1.61837	1.26307	-1.2813	0.200089	0.565505
WBGene00016340	5785	gba-2	174.623	1.61807	0.409779	-3.94865	7.85936e-05	0.00178891
WBGene00045143	10400	Y43D4A.8	2.86155	1.61752	2.01532	-0.802611	0.4222	0.786165
WBGene00023431	13338	C25E10.13	7.54057	1.61515	1.15114	-1.40309	0.160591	0.509953
WBGene00009242	11125	sre-6	6.49648	1.61361	1.46048	-1.10485	0.269226	0.650298
WBGene00017359	8789	F10E9.10	8.18538	1.6112	1.15539	-1.39451	0.163163	0.514437
WBGene00015399	1283	cyp-35A1	27.0963	1.61057	0.623035	-2.58505	0.00973661	0.0856446
WBGene00018351	341	F42G2.2	1942.16	1.61023	0.164747	-9.77398	1.45621e-22	3.74348e-20
WBGene00010795	3680	M01A8.1	194.968	1.60856	0.300456	-5.35373	8.61601e-08	3.8544e-06
WBGene00200121	25947	F40H3.14	1.03668	1.60825	3.82086	-0.420914	0.673818	NA
WBGene00022482	12353	fbxa-208	3.75042	1.6038	1.87284	-0.856348	0.391805	0.765392
WBGene00021017	15301	cil-7	16.8749	1.60371	0.73066	-2.19487	0.0281727	0.179667
WBGene00196086	2979	F16H9.4	1.65545	1.60357	2.17017	-0.738917	0.459958	NA
WBGene00194708	22881	Y36E3A.2	205.198	1.60317	0.483164	-3.31807	0.000906423	0.0138382
WBGene00044009	17302	ZK822.6	35.4734	1.6028	0.691439	-2.31807	0.0204456	0.144641
WBGene00015598	16660	fbxa-163	114.342	1.60144	1.19601	-1.33899	0.180575	0.53819
WBGene00010401	13126	H16D19.3	20.3964	1.59898	0.897698	-1.7812	0.0748793	0.330439
WBGene00020626	14786	T20F5.4	41.6957	1.59802	0.515893	-3.09758	0.00195108	0.0255093
WBGene00045314	10401	Y39C12A.10	2.95565	1.59684	2.28676	-0.698296	0.484992	0.82446
WBGene00023460	12867	F46H6.5	28.1345	1.59155	0.68093	-2.33732	0.0194226	0.139184
WBGene00006428	5577	tkr-3	96.7868	1.59152	0.363562	-4.37758	1.20006e-05	0.000340797
[truncated: 9,171 more rows]

## Sheet: Downregulated genes
Table S3. Genes down-regulated in sgk-1(lf) compared to wild type without CS.
gene_id	entrezid	symbol	baseMean	log2FoldChange	lfcSE	stat	pvalue	padj
WBGene00017501	5324	pud-3	5634.83	-4.75291	0.152038	31.2613	1.56616e-214	2.85856e-210
WBGene00017498	12749	pud-4	896.194	-4.78741	0.165495	28.9279	5.33032e-184	4.86445e-180
WBGene00005002	2089	spp-17	9517.56	-4.7942	0.252574	18.9814	2.43086e-80	7.39468e-77
WBGene00004789	87	sgk-1	1197.12	-2.37737	0.143442	16.5737	1.07899e-61	1.5149e-58
WBGene00000788	16	cpz-1	23198.9	-1.58183	0.104921	15.0763	2.31864e-51	2.64499e-48
WBGene00000213	6	asm-3	1745.91	-4.32679	0.289844	14.928	2.16621e-50	2.19654e-47
WBGene00018602	346	F48D6.4	6599.21	-2.1448	0.162625	13.1887	1.01993e-39	6.89475e-37
WBGene00012683	4736	asp-17	1676.86	-4.23401	0.329601	12.8458	9.07511e-38	5.34319e-35
WBGene00045305	4957	ZC250.4	1077.57	-2.41542	0.188109	12.8405	9.72425e-38	5.54647e-35
WBGene00019368	366	K03H6.2	2277.98	-2.16971	0.170632	12.7157	4.83665e-37	2.59643e-34
WBGene00003474	48	mtl-2	3364.37	-2.04473	0.160978	12.7019	5.76926e-37	3.00859e-34
WBGene00016048	8285	C24B9.3	3713.9	-1.15201	0.0984493	11.7015	1.25191e-31	5.31394e-29
WBGene00010083	696	xdh-1	1993.42	-1.66136	0.143096	11.6101	3.6603e-31	1.48462e-28
WBGene00000989	2018	dhs-26	280.771	-3.64019	0.323229	11.2619	2.02264e-29	7.85472e-27
WBGene00000703	18481	col-129	25426.6	-1.40344	0.133129	10.5419	5.53495e-26	1.74179e-23
WBGene00020587	20602	ugt-9	639.666	-1.48851	0.141696	10.505	8.19341e-26	2.53468e-23
WBGene00000712	12487	col-139	27216.7	-1.45553	0.138952	10.4751	1.12458e-25	3.42096e-23
WBGene00013037	269	Y49E10.18	696.896	-1.47112	0.141019	10.4321	1.76927e-25	5.2939e-23
WBGene00009830	5650	cutl-18	161.172	-3.29486	0.333124	9.89079	4.56402e-23	1.26216e-20
WBGene00000831	18975	ctl-2	4120.35	-1.12119	0.11377	9.85488	6.52922e-23	1.77868e-20
WBGene00010238	18100	F58B4.5	1177.27	-2.0476	0.210293	9.7369	2.09848e-22	5.17588e-20
WBGene00003443	2554	msp-50	602.965	-1.74807	0.179557	9.73546	2.12849e-22	5.17988e-20
WBGene00007308	6594	C04G2.9	1237.48	-1.81373	0.188967	9.59813	8.14068e-22	1.88081e-19
WBGene00020182	6853	ugt-53	343.018	-2.20916	0.230732	9.57454	1.02309e-21	2.33418e-19
WBGene00022642	2941	lipl-5	6534.19	-2.98948	0.31256	9.56452	1.12727e-21	2.50913e-19
WBGene00020343	5879	acs-3	1840.7	-1.18483	0.124787	9.49485	2.20528e-21	4.79177e-19
WBGene00000657	12987	col-81	18941.1	-1.43621	0.154432	9.29998	1.40474e-20	2.91355e-18
WBGene00016274	4309	C30G12.2	1616.53	-1.9561	0.211131	9.26487	1.95324e-20	3.96117e-18
WBGene00016943	18725	acdh-1	13624.4	-1.79139	0.196522	9.11548	7.83256e-20	1.50484e-17
WBGene00019208	11287	lips-14	149.206	-3.45381	0.380468	9.07778	1.10816e-19	2.08517e-17
WBGene00000722	5505	col-149	1225.29	-2.54676	0.281558	9.04524	1.49341e-19	2.7814e-17
WBGene00007515	645	C10C6.7	268.081	-1.97678	0.219612	9.00125	2.23165e-19	4.03288e-17
WBGene00003424	3557	msp-3	300.347	-2.07027	0.231988	8.92403	4.49637e-19	7.96774e-17
WBGene00003470	2052	msp-152	729.935	-1.79137	0.205399	8.7214	2.74787e-18	4.6439e-16
WBGene00077757	466	E02H4.7	359.888	-2.69719	0.313971	8.59056	8.65499e-18	1.39797e-15
WBGene00001633	10497	gly-8	2198.71	-0.924878	0.108099	8.55588	1.16975e-17	1.87283e-15
WBGene00006606	629	tra-3	3527.76	-0.80593	0.0946192	8.51761	1.62874e-17	2.54084e-15
WBGene00009902	6176	drd-1	607.717	-1.88787	0.222037	8.50248	1.85582e-17	2.84643e-15
WBGene00006039	7074	ssp-10	257.968	-1.86955	0.226673	8.24778	1.61361e-16	2.19788e-14
WBGene00021160	908	gba-4	1298.98	-4.75064	0.579297	8.2007	2.38986e-16	3.23109e-14
WBGene00019060	14274	acox-3	6871.17	-0.84658	0.105064	8.05778	7.76905e-16	1.02015e-13
WBGene00012253	7200	clec-50	10043.7	-1.32373	0.165182	8.01376	1.11252e-15	1.42998e-13
WBGene00007565	7618	clec-48	913.432	-1.49299	0.186802	7.99238	1.32354e-15	1.67759e-13
WBGene00022083	2427	Y69A2AR.12	156.258	-2.48968	0.313463	7.94251	1.98132e-15	2.46007e-13
WBGene00003438	3056	msp-45	499.322	-1.72187	0.219431	7.84697	4.26194e-15	5.22073e-13
WBGene00013474	3748	Y69E1A.2	784.312	-1.56733	0.200073	7.83379	4.73382e-15	5.76011e-13
WBGene00003425	47	msp-10	254.877	-1.79708	0.229492	7.83072	4.85089e-15	5.86347e-13
WBGene00018643	10309	drd-50	478.411	-2.592	0.33417	7.75654	8.72746e-15	1.04798e-12
WBGene00019963	883	R08E5.3	921.569	-1.34675	0.174187	7.73164	1.06171e-14	1.25239e-12
WBGene00017499	8792	pud-1.1	95.1886	-2.38285	0.308913	7.71366	1.22256e-14	1.42128e-12
WBGene00003446	10035	msp-53	625.293	-1.53277	0.199024	7.70142	1.34559e-14	1.54107e-12
WBGene00014251	7244	gstk-1	1615.11	-1.16715	0.153219	7.61757	2.58493e-14	2.91235e-12
WBGene00003442	1552	msp-49	379.903	-1.74551	0.229407	7.60878	2.76706e-14	3.09842e-12
WBGene00004000	53	pgp-6	2930.31	-1.23616	0.163015	7.58307	3.37483e-14	3.71069e-12
WBGene00000786	11989	cpr-6	54801.9	-0.766507	0.102385	7.48649	7.07417e-14	7.55074e-12
WBGene00016658	13231	C45B2.1	4341.47	-1.54134	0.206618	7.45987	8.66075e-14	9.13734e-12
WBGene00003458	5047	msp-65	435.575	-1.55509	0.208635	7.45365	9.07933e-14	9.5239e-12
WBGene00021993	10857	Y59E9AL.3	171.182	-2.17539	0.291928	7.45181	9.20678e-14	9.60241e-12
WBGene00021113	19295	gsp-3	309.244	-1.58481	0.213338	7.42865	1.09715e-13	1.13137e-11
WBGene00006051	9587	ssq-2	1395.72	-1.52552	0.205538	7.42208	1.15296e-13	1.18224e-11
WBGene00003426	11529	msp-19	799.704	-1.37827	0.185841	7.41639	1.20357e-13	1.22724e-11
WBGene00004052	2067	parg-2	2475.49	-2.32245	0.313951	7.39747	1.38807e-13	1.4075e-11
WBGene00017500	12750	pud-2.2	146.024	-2.76783	0.375633	7.36844	1.72637e-13	1.74087e-11
WBGene00017490	19716	pud-2.1	175.421	-2.60567	0.355403	7.3316	2.27419e-13	2.2559e-11
WBGene00010062	16585	lipl-1	1204.19	-2.08332	0.28892	7.21073	5.56527e-13	5.13017e-11
WBGene00006050	5080	ssq-1	1203.43	-1.48038	0.205526	7.20287	5.89584e-13	5.35378e-11
WBGene00003449	6068	msp-56	409.852	-1.41972	0.197967	7.17152	7.41683e-13	6.63588e-11
WBGene00010034	203	F54B11.11	99.9444	-2.60687	0.364641	7.14916	8.73102e-13	7.70979e-11
WBGene00010657	13129	K08D8.3	708.583	-1.83448	0.256608	7.14896	8.74385e-13	7.70979e-11
WBGene00021398	22316	Y38C1AA.7	517.442	-1.10943	0.156885	7.07163	1.53128e-12	1.33727e-10
WBGene00000753	4503	col-180	647.586	-1.53136	0.220138	6.95638	3.49116e-12	3.01994e-10
WBGene00003463	8036	msp-76	880.096	-1.44185	0.207451	6.95034	3.64417e-12	3.13742e-10
WBGene00003468	10525	msp-113	705.661	-1.35039	0.195146	6.91989	4.5198e-12	3.85493e-10
WBGene00003452	9550	msp-59	883.342	-1.57346	0.229057	6.8693	6.45193e-12	5.45188e-10
WBGene00013290	12675	Y57G11A.2	442.532	-1.34467	0.197069	6.82335	8.89404e-12	7.44651e-10
WBGene00021236	18807	pud-1.2	116.729	-2.32373	0.343538	6.76411	1.34127e-11	1.10274e-09
WBGene00008565	4640	acox-1.2	689.76	-1.47849	0.218754	6.75867	1.39266e-11	1.13986e-09
WBGene00017771	335	F25B4.8	272.314	-2.24288	0.334057	6.71409	1.89248e-11	1.52839e-09
WBGene00017012	21692	acs-22	4211.25	-0.592773	0.0886491	6.68674	2.28202e-11	1.82682e-09
WBGene00013074	1243	hmit-1.2	272.585	-1.5315	0.229372	6.67694	2.43986e-11	1.93619e-09
WBGene00000708	511	col-135	5019.64	-1.41413	0.211789	6.67709	2.43741e-11	1.93619e-09
WBGene00017301	5812	hach-1	9426.01	-0.660119	0.0993674	6.64321	3.06917e-11	2.42505e-09
WBGene00006053	14057	ssq-4	1488.15	-1.31766	0.200743	6.56392	5.24103e-11	4.0193e-09
WBGene00004930	89	sod-1	9209.78	-0.637082	0.0973132	6.54672	5.88146e-11	4.49157e-09
WBGene00003432	5046	msp-36	1137.55	-1.3437	0.205726	6.53152	6.51041e-11	4.95117e-09
WBGene00003467	13518	msp-81	799.659	-1.63677	0.251362	6.5116	7.43535e-11	5.5538e-09
WBGene00003450	11024	msp-57	650.42	-1.42921	0.22092	6.46934	9.84343e-11	7.24445e-09
WBGene00004989	90	spp-4	802.737	-1.89154	0.292519	6.46639	1.00375e-10	7.35762e-09
WBGene00009215	169	thn-2	1176.57	-1.23452	0.191127	6.45919	1.05262e-10	7.68495e-09
WBGene00009375	12602	F34D10.6	305.062	-1.99065	0.308347	6.45589	1.07587e-10	7.82344e-09
WBGene00009213	12596	thn-1	119.959	-2.38571	0.380967	6.26224	3.79479e-10	2.5941e-08
WBGene00017691	4835	ilys-5	15989.9	-0.69997	0.112452	6.2246	4.82777e-10	3.23958e-08
WBGene00006040	8073	ssp-11	86.0311	-2.22319	0.358123	6.2079	5.36972e-10	3.57694e-08
WBGene00015860	3297	C16D9.5	39.2255	-3.44739	0.560999	6.1451	7.99143e-10	5.09999e-08
WBGene00019188	4356	H11E01.3	428.172	-2.09287	0.343233	6.0975	1.07738e-09	6.82792e-08
WBGene00016447	4806	msd-4	657.734	-1.6319	0.268001	6.08915	1.13509e-09	7.16877e-08
WBGene00003431	6067	msp-33	742.705	-1.36435	0.225739	6.04392	1.50417e-09	9.30649e-08
WBGene00000715	14982	col-142	11913.9	-0.95334	0.15778	6.04221	1.52016e-09	9.37362e-08
WBGene00003457	3558	msp-64	476.791	-2.10902	0.349275	6.03829	1.55757e-09	9.572e-08
WBGene00010811	4694	hmit-1.3	2239.59	-0.701248	0.116379	6.02554	1.68548e-09	1.02887e-07
WBGene00017542	9303	F17E9.5	446.2	-1.61352	0.271159	5.95045	2.67399e-09	1.59496e-07
WBGene00020247	3869	T05B11.4	957.464	-0.691075	0.116331	5.94058	2.84008e-09	1.6885e-07
WBGene00020674	16714	T22B7.7	2157.52	-1.36581	0.230432	5.92716	3.08219e-09	1.8265e-07
WBGene00003464	8545	msp-77	549.148	-1.15833	0.195898	5.91294	3.36063e-09	1.97865e-07
WBGene00003434	10523	msp-38	267.997	-1.90027	0.322296	5.89603	3.72343e-09	2.17821e-07
WBGene00013473	8723	Y69E1A.1	420.477	-1.41129	0.240168	5.87625	4.19672e-09	2.44723e-07
WBGene00019406	7852	acdh-8	290.052	-1.51687	0.259524	5.84482	5.07131e-09	2.92916e-07
WBGene00003444	9029	msp-51	778.318	-1.50019	0.257782	5.81962	5.89817e-09	3.36417e-07
WBGene00009959	21584	F53B6.4	556.544	-1.20202	0.207797	5.78459	7.26891e-09	4.08222e-07
WBGene00021791	17270	Y51H7C.13	502.977	-1.36701	0.236926	5.76978	7.93751e-09	4.40351e-07
WBGene00012149	8695	VF13D12L.3	8712.77	-0.567611	0.0985978	5.75683	8.57084e-09	4.74046e-07
WBGene00016942	5800	C55B7.3	110.367	-1.98579	0.34532	5.75058	8.89387e-09	4.90425e-07
WBGene00003429	3055	msp-31	864.675	-1.4991	0.262093	5.71973	1.06692e-08	5.8655e-07
WBGene00017874	22740	acdh-9	6863.86	-0.485619	0.0850918	5.707	1.14983e-08	6.26468e-07
WBGene00000781	1510	cpr-1	3900.51	-1.27262	0.223768	5.68725	1.29101e-08	7.00387e-07
WBGene00014206	3276	nit-1	2659.75	-0.907136	0.159526	5.68646	1.29701e-08	7.00387e-07
WBGene00020436	12809	T12A2.1	561.274	-0.815106	0.143605	5.67603	1.37859e-08	7.37887e-07
WBGene00020661	14304	smz-2	346.251	-1.25759	0.223916	5.61635	1.95038e-08	1.0171e-06
WBGene00020962	16141	W02H5.8	896.901	-0.820645	0.146149	5.61512	1.96425e-08	1.02141e-06
WBGene00044898	18863	let-383	98.9607	-2.17471	0.387611	5.61056	2.01671e-08	1.0398e-06
WBGene00000967	4512	dhs-3	3550.51	-0.755611	0.13568	5.56906	2.56118e-08	1.30214e-06
WBGene00001758	4040	gst-10	1304.98	-1.23524	0.221972	5.56483	2.62409e-08	1.33041e-06
WBGene00020990	19772	W03D8.9	430.701	-0.964282	0.173672	5.55232	2.81903e-08	1.41744e-06
WBGene00003448	14022	msp-55	367.384	-1.65319	0.298949	5.53	3.20232e-08	1.59261e-06
WBGene00009787	11638	F46F2.3	6456.11	-0.878656	0.161644	5.43575	5.45677e-08	2.59367e-06
WBGene00004183	58	prk-2	440.985	-1.38593	0.255231	5.43009	5.63263e-08	2.64966e-06
WBGene00019311	14277	K02E7.6	219.153	-2.27207	0.419357	5.41798	6.02773e-08	2.7996e-06
WBGene00019240	1379	H24K24.3	9953.52	-0.470802	0.0873523	5.3897	7.0577e-08	3.2285e-06
WBGene00011554	9189	T07A5.1	378.762	-0.990361	0.184803	5.359	8.36827e-08	3.78064e-06
WBGene00043743	14347	Y59E9AL.2	112.732	-1.86825	0.348935	5.35415	8.59605e-08	3.8544e-06
WBGene00017112	17701	E03H12.5	262.125	-1.40583	0.262556	5.35441	8.5836e-08	3.8544e-06
WBGene00015814	12225	oatr-1	11173.5	-0.546158	0.10212	5.34822	8.88217e-08	3.96375e-06
WBGene00021996	21765	Y59E9AL.6	380.166	-1.37304	0.257691	5.32826	9.91576e-08	4.39278e-06
WBGene00006936	2620	glp-4	39845.3	-0.435573	0.0819159	5.31731	1.0531e-07	4.63163e-06
WBGene00006927	109	vit-3	294987	-2.22626	0.41927	5.30986	1.09712e-07	4.79056e-06
WBGene00003522	21990	nas-3	121.621	-1.62373	0.306344	5.30035	1.15583e-07	5.02292e-06
WBGene00003704	50	nhr-114	1334.42	-1.03918	0.197796	5.2538	1.48995e-07	6.33905e-06
WBGene00004469	601	rps-0	133224	-0.468854	0.089778	5.22237	1.76648e-07	7.46338e-06
WBGene00022378	2439	Y94H6A.5	4073.23	-0.54103	0.103684	5.21808	1.80784e-07	7.62049e-06
WBGene00012911	1242	acl-7	1703.5	-0.741685	0.142267	5.21332	1.85486e-07	7.80066e-06
WBGene00016912	11243	clec-86	65.1988	-2.70344	0.519144	5.2075	1.914e-07	7.99413e-06
WBGene00016523	9781	C39B5.5	623.86	-1.17648	0.225955	5.20669	1.92242e-07	8.01095e-06
WBGene00004425	1086	rpl-13	120307	-0.47989	0.0922141	5.20408	1.94961e-07	8.10574e-06
WBGene00019189	865	H11L12.1	462.545	-1.26811	0.245776	5.15962	2.47451e-07	1.01952e-05
WBGene00016541	9782	C39H7.1	357.654	-1.18364	0.229665	5.15378	2.55289e-07	1.04944e-05
WBGene00007159	12056	B0379.7	229.26	-1.27398	0.249352	5.10915	3.23606e-07	1.32135e-05
WBGene00011795	13672	T16A9.5	284.497	-1.2072	0.237338	5.0864	3.64923e-07	1.47358e-05
WBGene00012608	21629	hphd-1	8190.88	-0.906639	0.178379	5.08266	3.72176e-07	1.49955e-05
WBGene00001603	13998	gln-2	249.407	-1.52798	0.302178	5.05654	4.26927e-07	1.69766e-05
WBGene00006056	21028	sss-1	704.424	-0.988741	0.195805	5.04962	4.42683e-07	1.75268e-05
WBGene00009226	16574	cyp-37B1	76.7892	-3.25693	0.647593	5.02928	4.92318e-07	1.93243e-05
WBGene00022090	12345	Y69A2AR.19	264.23	-1.2858	0.256149	5.01974	5.17427e-07	2.01796e-05
WBGene00000515	1009	ckc-1	1160.16	-0.724257	0.144417	5.01505	5.30184e-07	2.06331e-05
WBGene00010212	700	fbxa-192	891.106	-0.761972	0.152222	5.00566	5.56712e-07	2.16194e-05
WBGene00022096	922	Y69A2AR.25	44.1458	-3.34644	0.668819	5.00351	5.62955e-07	2.17692e-05
WBGene00019769	376	M04F3.3	303.818	-0.903586	0.180716	5.00002	5.7324e-07	2.212e-05
WBGene00020349	386	T08B2.11	848.523	-0.823196	0.166613	4.94077	7.78165e-07	2.92244e-05
WBGene00043981	15842	T14E8.4	63.6233	-2.39208	0.486768	4.91421	8.9139e-07	3.31358e-05
WBGene00001604	6033	gln-3	10565.9	-0.922832	0.188705	4.89035	1.00659e-06	3.69662e-05
WBGene00009031	18592	F21H7.5	462.694	-1.01199	0.207494	4.87723	1.07584e-06	3.91158e-05
WBGene00006038	6578	ssp-9	56.1983	-2.26008	0.463753	4.87345	1.09666e-06	3.97936e-05
WBGene00020938	8376	clec-218	3010.28	-1.00897	0.208022	4.8503	1.23278e-06	4.4119e-05
WBGene00012207	17137	W02B12.12	234.489	-1.2269	0.25346	4.84059	1.29454e-06	4.62388e-05
WBGene00010953	13657	clec-190	355.552	-1.10276	0.228134	4.83384	1.33923e-06	4.76483e-05
WBGene00017210	2332	F07E5.5	3882.68	-0.374208	0.0774396	4.83226	1.34991e-06	4.79349e-05
WBGene00013999	10228	ZK550.5	228.742	-1.38742	0.2879	4.81911	1.44198e-06	5.10059e-05
WBGene00022046	920	Y66H1A.4	17412.6	-0.494803	0.10361	4.77564	1.79136e-06	6.2756e-05
WBGene00013947	22668	ZK228.4	1736.98	-1.12359	0.235463	4.77184	1.82552e-06	6.34656e-05
WBGene00019026	4355	F58A6.9	89.7589	-1.7465	0.367347	4.75434	1.99092e-06	6.9084e-05
WBGene00015167	1780	B0403.3	620.734	-1.12714	0.237319	4.74947	2.0395e-06	7.05017e-05
WBGene00020414	21747	T10E9.4	488.374	-1.05064	0.22137	4.74609	2.07388e-06	7.12851e-05
WBGene00004728	8063	sax-2	9492.31	-1.4903	0.314065	4.7452	2.08303e-06	7.14653e-05
WBGene00012827	12180	Y43F8C.5	85.946	-1.77711	0.376969	4.71422	2.42643e-06	8.27763e-05
WBGene00020187	19763	gsp-4	317.898	-0.961369	0.204012	4.71232	2.44908e-06	8.32413e-05
WBGene00000373	18470	cyp-14A5	10019.8	-0.59484	0.126612	4.69813	2.62551e-06	8.89069e-05
WBGene00010254	22083	F58E6.5	198.382	-1.20886	0.25746	4.69532	2.66187e-06	8.98048e-05
WBGene00018931	15762	ugt-52	312.24	-1.27182	0.271539	4.68374	2.8169e-06	9.46852e-05
WBGene00012428	8222	Y11D7A.3	2488.6	-0.570228	0.121854	4.6796	2.8744e-06	9.64405e-05
WBGene00006924	5098	vig-1	142480	-0.402928	0.0861252	4.6784	2.89119e-06	9.68257e-05
WBGene00003435	14021	msp-40	789.052	-1.55011	0.331696	4.67327	2.96436e-06	9.85529e-05
WBGene00019547	21198	K09C4.1	148.117	-1.33956	0.286735	4.67178	2.98601e-06	9.90922e-05
WBGene00007508	2123	C10C5.4	2654.26	-0.885594	0.189649	4.66964	3.01733e-06	9.99498e-05
WBGene00012294	9209	nspa-8	71.6107	-2.9391	0.631027	4.65764	3.19854e-06	0.000105379
WBGene00011538	727	T06E6.1	4689.41	-0.375067	0.080542	4.65679	3.2118e-06	0.000105625
WBGene00015094	22182	B0261.6	173.765	-1.41958	0.305601	4.6452	3.3974e-06	0.000111327
WBGene00016283	18717	zmp-3	872.775	-0.624133	0.134461	4.64175	3.45465e-06	0.000112798
WBGene00007165	639	B0391.10	912.013	-0.601406	0.129829	4.63231	3.61616e-06	0.000117651
WBGene00019430	18233	K06A5.2	527.876	-0.92131	0.199208	4.62486	3.7485e-06	0.000121523
WBGene00011003	2197	R04B5.5	827.324	-0.875834	0.190181	4.60527	4.11929e-06	0.000132602
WBGene00019586	18768	K09F6.3	217.341	-1.11991	0.243324	4.60255	4.17353e-06	0.000134111
WBGene00003466	10524	msp-79	407.644	-1.46081	0.317851	4.59589	4.30909e-06	0.000138224
WBGene00010706	4691	cyp-14A2	110.071	-1.65103	0.359651	4.59064	4.41886e-06	0.000141249
WBGene00016103	8286	dpyd-1	6190.69	-0.599433	0.130616	4.58928	4.44786e-06	0.000141927
WBGene00009898	199	dod-23	4952.14	-0.876712	0.19165	4.57454	4.77278e-06	0.000151005
WBGene00000707	5504	col-133	1366.13	-1.18637	0.259384	4.57379	4.78982e-06	0.000151194
WBGene00004235	12534	ptr-21	2260.68	-0.719909	0.15743	4.57288	4.81064e-06	0.000151386
WBGene00009344	10128	F32H2.7	256.149	-1.50492	0.329386	4.56887	4.9036e-06	0.000153781
WBGene00008511	12093	F01G10.9	220.522	-1.1282	0.247597	4.55661	5.19867e-06	0.000162199
WBGene00001752	14003	gst-4	3890.72	-0.888164	0.195466	4.54383	5.52406e-06	0.00017118
WBGene00000966	11500	dhs-2	626.802	-0.799335	0.17717	4.51168	6.43166e-06	0.000196634
WBGene00004001	1559	pgp-7	216.055	-1.78025	0.394707	4.5103	6.47346e-06	0.000197581
WBGene00009684	7143	msd-3	67.5946	-2.23688	0.496123	4.50872	6.52185e-06	0.000198726
WBGene00018375	842	F43C9.1	139.745	-2.27597	0.505034	4.50657	6.58841e-06	0.00020042
WBGene00013946	22166	ZK228.3	914.049	-0.906634	0.202061	4.48692	7.22591e-06	0.000217996
WBGene00001716	543	grl-7	124.691	-1.50298	0.335509	4.47971	7.47453e-06	0.000225124
WBGene00011753	8205	T13F3.6	3580.64	-0.803538	0.179973	4.46477	8.01565e-06	0.000239839
WBGene00010896	2718	M28.5	29869.5	-0.462873	0.104188	4.44268	8.88453e-06	0.000262512
WBGene00020840	14307	spch-3	332.292	-1.08584	0.245431	4.42421	9.67967e-06	0.0002837
WBGene00004440	1570	rpl-26	23136.1	-0.49715	0.112409	4.42271	9.74726e-06	0.000285107
WBGene00016483	2309	C36C5.14	11.4537	-7.26272	1.64869	4.40516	1.05706e-05	0.000307711
WBGene00019599	22276	acds-10	2406.02	-0.395072	0.0899114	4.39402	1.11275e-05	0.000320346
WBGene00012087	20529	T27E7.1	314.863	-1.1426	0.260368	4.38839	1.14191e-05	0.000328223
WBGene00017955	19724	F31E8.5	124.748	-1.43723	0.327644	4.38655	1.15165e-05	0.000329982
WBGene00004479	2583	rps-10	63007.3	-0.448447	0.102291	4.38401	1.16512e-05	0.000332798
WBGene00015050	16651	clec-51	836.884	-0.70386	0.160849	4.37591	1.20929e-05	0.000342202
WBGene00194703	19862	F26B1.8	505.199	-0.870385	0.199339	4.36634	1.26343e-05	0.000356416
WBGene00009682	8156	msd-2	342.8	-1.53101	0.350921	4.36283	1.28391e-05	0.000361077
WBGene00000740	8500	col-167	990.026	-0.777957	0.178347	4.36204	1.28855e-05	0.000361824
WBGene00013083	22150	Y51A2D.18	1350.4	-0.651247	0.149689	4.35068	1.35714e-05	0.000379335
WBGene00007228	9611	acs-7	3903.17	-0.567499	0.130661	4.34329	1.40365e-05	0.000389947
WBGene00006509	14061	tag-164	99.0804	-1.43534	0.331552	4.32916	1.49677e-05	0.000412051
WBGene00007307	11589	spch-1	353.754	-1.08348	0.250712	4.32162	1.54889e-05	0.000425118
WBGene00015820	22198	C16A11.7	75.9352	-1.49271	0.345609	4.31906	1.56695e-05	0.000428144
WBGene00020756	7359	T24A6.20	674.593	-0.70816	0.164003	4.31797	1.57471e-05	0.00042962
WBGene00016046	8284	C24B5.4	279.801	-0.882253	0.20439	4.31652	1.58511e-05	0.000431812
WBGene00000741	9501	col-168	328.546	-1.17081	0.272042	4.30377	1.67914e-05	0.000453771
WBGene00013007	8716	Y48E1B.8	308.212	-1.16278	0.270142	4.30433	1.67494e-05	0.000453771
WBGene00012880	1241	Y45F10C.4	785.552	-0.84454	0.197888	4.26776	1.97444e-05	0.000528408
WBGene00004433	1090	rpl-21	71787.5	-0.474309	0.111309	4.26121	2.03325e-05	0.000541764
WBGene00013541	13708	lonp-2	1906.6	-0.557483	0.13119	4.24942	2.14324e-05	0.000567756
WBGene00019151	11283	pck-3	99.209	-1.39354	0.329018	4.23545	2.28099e-05	0.000599893
WBGene00017934	7824	F30B5.4	3432.25	-0.483872	0.114307	4.23308	2.30516e-05	0.000605175
WBGene00003469	11531	msp-142	241.879	-1.66123	0.392499	4.23245	2.31159e-05	0.000605324
WBGene00004409	584	rla-1	65718.7	-0.407307	0.0964648	4.22234	2.41777e-05	0.000630417
WBGene00006925	634	vit-1	272407	-1.89511	0.449394	4.21704	2.47528e-05	0.000643572
WBGene00007598	14083	C15A11.4	80.7921	-1.58579	0.376076	4.21667	2.47935e-05	0.000643713
WBGene00010111	2692	F55D12.2	999.27	-0.550521	0.130692	4.21234	2.52738e-05	0.000654322
WBGene00000776	13985	cpl-1	92654.2	-0.657194	0.157058	4.18439	2.8593e-05	0.000738161
WBGene00019001	1371	ipgm-1	15757	-0.341744	0.0816799	4.18394	2.86501e-05	0.000738589
WBGene00000256	7991	bli-6	1077.56	-1.02078	0.24413	4.18129	2.89864e-05	0.000744108
WBGene00018911	23826	F56A4.3	75.8314	-1.74675	0.418526	4.17359	2.99842e-05	0.000766486
WBGene00011321	11154	fil-1	55.7097	-2.25836	0.541763	4.16853	3.06567e-05	0.000781489
WBGene00012964	1749	Y48A6B.3	7168.31	-0.442491	0.106199	4.16661	3.09161e-05	0.000785905
WBGene00015751	8754	C14A11.6	103.612	-1.15323	0.276804	4.16625	3.09657e-05	0.000786072
WBGene00016034	18714	C24A3.4	420.076	-0.79531	0.191316	4.15704	3.22395e-05	0.00081388
WBGene00010719	8174	K09E4.1	153.861	-1.20534	0.290964	4.14256	3.43453e-05	0.000861087
WBGene00004480	1575	rps-11	77005.5	-0.453354	0.109633	4.1352	3.54642e-05	0.000885941
WBGene00009377	22597	F34D10.8	59.3425	-1.78898	0.432876	4.13278	3.58406e-05	0.000893665
WBGene00004904	15517	snf-5	357.699	-1.00693	0.244011	4.12657	3.68213e-05	0.000915618
WBGene00014158	9243	ZK938.1	418.41	-0.827049	0.200517	4.12459	3.71399e-05	0.000922281
WBGene00022771	5438	ZK616.1	36.6131	-2.38588	0.57937	4.11807	3.82066e-05	0.000946197
WBGene00019760	13277	calu-1	16677	-0.584243	0.141944	4.116	3.85507e-05	0.000953425
WBGene00017688	2345	ttr-35	1133.59	-0.834442	0.203028	4.10999	3.95669e-05	0.000975913
WBGene00016053	22206	ptp-5.1	61.7217	-1.68301	0.410508	4.09982	4.13466e-05	0.00101569
WBGene00011491	22113	T05F1.5	98.7688	-1.31391	0.320703	4.09697	4.18589e-05	0.00102689
WBGene00007301	15561	C04F12.7	903.045	-0.810819	0.198154	4.09186	4.27935e-05	0.00104561
WBGene00018877	856	aman-1	2494.81	-0.653232	0.159671	4.09112	4.29293e-05	0.00104752
WBGene00016419	13225	tyr-4	6352.15	-0.461403	0.112841	4.08898	4.33269e-05	0.00105581
WBGene00016644	7286	abhd-3.2	3202.77	-0.901104	0.220469	4.08721	4.36584e-05	0.00106247
WBGene00017114	17207	E03H12.7	66.8223	-1.49056	0.366247	4.06981	4.70522e-05	0.0011405
WBGene00015403	17672	clec-10	648.222	-0.772564	0.19021	4.06163	4.87309e-05	0.00117806
WBGene00010574	22613	K04H4.5	192.514	-1.07246	0.264782	4.05034	5.11428e-05	0.00122985
WBGene00017962	7313	fbxa-72	1029.83	-0.932319	0.230215	4.04978	5.12658e-05	0.00123071
WBGene00000615	1011	col-38	811.856	-1.04643	0.258702	4.04493	5.23385e-05	0.00125365
WBGene00004499	611	rps-30	59761.1	-0.44825	0.11126	4.02887	5.60464e-05	0.00133198
WBGene00015024	15677	B0205.10	180.909	-1.18107	0.294387	4.01196	6.02164e-05	0.00142551
WBGene00009991	2690	F53F4.8	38.1478	-2.65456	0.661984	4.01001	6.07152e-05	0.00143546
WBGene00007733	10584	smz-1	362.269	-1.08583	0.270893	4.00833	6.11497e-05	0.00144386
WBGene00007344	2120	C05E7.2	73.7009	-1.65033	0.412097	4.0047	6.20953e-05	0.0014624
WBGene00021641	413	Y47G6A.15	734.897	-1.16565	0.291661	3.99658	6.4265e-05	0.00150767
WBGene00001423	5517	fib-1	59033.9	-0.572196	0.143395	3.99034	6.59786e-05	0.00154192
WBGene00021233	2414	Y19D10B.4	26.472	-10.114	2.53622	3.98783	6.66804e-05	0.00155381
WBGene00020915	1413	nol-58	34356.5	-0.569191	0.142784	3.98638	6.70891e-05	0.00155989
WBGene00021073	3413	nol-2	11394.9	-0.511514	0.128552	3.97903	6.9197e-05	0.00160685
WBGene00000116	22463	alh-10	2149.59	-0.50846	0.128042	3.97105	7.15572e-05	0.00165534
WBGene00009689	15106	F44E5.2	12.6835	-6.59666	1.66311	3.96645	7.29517e-05	0.00167697
WBGene00007533	15565	cbl-1	2113.78	-0.485317	0.122342	3.96689	7.28159e-05	0.00167697
WBGene00009581	17091	F40F9.3	129.604	-1.16229	0.293073	3.96588	7.31269e-05	0.00167888
WBGene00007946	6616	ugt-33	128.725	-1.70866	0.431102	3.96347	7.3868e-05	0.00169377
WBGene00001768	1042	gst-20	1589.05	-0.991531	0.251045	3.94962	7.82749e-05	0.00178808
WBGene00010456	14622	K01C8.1	4884.98	-0.443763	0.112437	3.94676	7.92163e-05	0.00180057
WBGene00019561	17234	K09C6.7	111.633	-1.28509	0.326415	3.93699	8.25105e-05	0.00186266
WBGene00017398	12248	slc-17.6	2113.84	-0.478604	0.121639	3.93462	8.33293e-05	0.00187769
WBGene00007143	13578	B0334.3	14333.5	-0.440016	0.111924	3.93139	8.44578e-05	0.00189843
WBGene00008567	22581	acox-1.4	908.48	-0.645165	0.164432	3.92359	8.72382e-05	0.00195851
WBGene00022610	11861	ltah-1.2	3687.13	-0.452445	0.115463	3.91852	8.9094e-05	0.00198795
WBGene00001793	10014	gsy-1	18426.8	-0.368913	0.0943333	3.91074	9.20136e-05	0.00204559
WBGene00015795	13211	C15F1.2	146.743	-1.10842	0.283688	3.9072	9.33727e-05	0.00206907
WBGene00004969	22005	spe-15	1091.02	-0.710623	0.181955	3.90549	9.40358e-05	0.00208041
WBGene00010900	13655	M28.9	219.235	-1.26845	0.324898	3.90415	9.45575e-05	0.00208908
WBGene00044737	5452	ttr-45	10611.7	-0.484012	0.123991	3.9036	9.47709e-05	0.00208908
WBGene00004470	602	rps-1	129558	-0.443859	0.113804	3.9002	9.61137e-05	0.00211358
WBGene00017075	2835	nap-1	45219	-0.337359	0.0865106	3.89963	9.63408e-05	0.00211602
WBGene00012231	4722	W04A4.2	2299.56	-0.37435	0.0960444	3.89768	9.71201e-05	0.00213057
WBGene00015855	18709	C16C8.18	59.0511	-1.868	0.480752	3.88559	0.000102082	0.00222605
WBGene00012741	16619	Y40H4A.2	49.6509	-1.66476	0.428857	3.88184	0.000103667	0.00225254
WBGene00008390	661	D1086.3	3356.94	-0.548946	0.141696	3.87411	0.000107016	0.00231155
WBGene00011694	15640	T10G3.3	525.567	-0.725275	0.187323	3.87178	0.000108045	0.00232419
WBGene00000667	12484	col-92	4549.91	-0.669504	0.172923	3.87169	0.000108085	0.00232419
WBGene00013956	22669	ZK265.3	256.144	-1.11469	0.288001	3.87044	0.000108641	0.00233009
WBGene00008564	17078	acox-1.1	3109.95	-0.336942	0.0871656	3.86554	0.000110845	0.00237179
WBGene00020070	10326	rmd-6	72.7913	-1.51537	0.392509	3.86073	0.000113051	0.0024049
WBGene00009681	12113	gipc-2	1255.57	-0.880539	0.228392	3.85539	0.000115547	0.00245228
WBGene00013723	11202	Y106G6H.13	202.486	-1.32208	0.342967	3.85483	0.00011581	0.00245501
WBGene00004428	1087	rpl-16	87368.2	-0.429196	0.111861	3.83688	0.000124606	0.00262926
WBGene00022076	13317	daao-1	169.882	-1.07899	0.281913	3.82739	0.00012951	0.00271391
WBGene00010651	13649	K08C9.2	203.482	-0.916758	0.239862	3.82203	0.00013236	0.00277028
WBGene00016659	814	C45B2.2	337.276	-1.41225	0.369819	3.81876	0.000134126	0.00279779
WBGene00044989	3465	Y37A1B.17	5298.48	-1.18183	0.309648	3.81668	0.000135258	0.00281818
WBGene00022584	431	ZC266.1	454.355	-0.950514	0.249682	3.8069	0.000140717	0.00291529
WBGene00021007	7367	W03F11.4	184.675	-1.2684	0.3342	3.79532	0.000147451	0.00303413
WBGene00007190	12058	rmd-3	308.505	-1.17659	0.310076	3.79454	0.00014792	0.00303693
WBGene00020254	1883	T05C3.2	58.3439	-1.40151	0.369883	3.78905	0.000151225	0.00309501
WBGene00012595	22131	Y38E10A.17	445.634	-1.00537	0.26534	3.789	0.000151257	0.00309501
WBGene00004420	588	rpl-9	73892.4	-0.466693	0.123319	3.78444	0.000154055	0.0031452
WBGene00007521	9103	C11E4.7	671.252	-0.564502	0.149382	3.77892	0.000157512	0.0031979
WBGene00189950	10421	C39B5.14	29.7796	-2.30671	0.610469	3.77858	0.000157723	0.00319863
WBGene00016558	5302	pks-1	1329.13	-1.00332	0.265932	3.77285	0.000161392	0.00326216
WBGene00015689	19198	spch-2	106.709	-1.42389	0.377958	3.76732	0.000165009	0.00332056
WBGene00000646	8497	H17B01.2	38.4586	-1.71485	0.45551	3.76469	0.000166755	0.00334499
WBGene00020408	10333	T10D4.6	1896.96	-0.579475	0.153925	3.76466	0.000166773	0.00334499
WBGene00010933	16595	M162.7	80.567	-1.44223	0.383202	3.76363	0.000167464	0.00335359
WBGene00020215	1882	T04G9.4	539.319	-0.615649	0.163585	3.76347	0.000167569	0.00335359
WBGene00004472	603	rps-3	110687	-0.419658	0.111669	3.75805	0.00017124	0.00341956
WBGene00013284	13182	daf-22	4898.26	-0.560673	0.14976	3.74381	0.000181252	0.00361158
WBGene00022104	5912	acsd-1	331.547	-0.63885	0.170675	3.74307	0.000181784	0.00361429
WBGene00013766	1263	prmt-1	44406.9	-0.310568	0.0829712	3.74308	0.000181778	0.00361429
WBGene00004432	1089	rpl-20	58054	-0.495778	0.132554	3.74021	0.000183869	0.00365176
WBGene00003551	5537	nas-33	83.0686	-1.32937	0.356901	3.72476	0.000195502	0.0038618
WBGene00004487	81	rps-18	80694.6	-0.309283	0.083075	3.72293	0.000196923	0.0038781
WBGene00021074	3893	W07E6.2	3459.15	-0.382927	0.102888	3.7218	0.000197806	0.00389046
WBGene00017019	20570	D1014.6	19.0258	-6.49666	1.74947	3.71351	0.000204404	0.00400299
WBGene00021491	9880	comt-4	122.227	-1.97679	0.532443	3.71267	0.000205082	0.00400967
WBGene00015051	13726	B0218.7	147.667	-1.20376	0.324426	3.71044	0.000206899	0.00403884
WBGene00015802	12224	kynu-1	6404.3	-0.560963	0.15163	3.69955	0.000215982	0.00418926
WBGene00016054	10729	C24D10.2	89.6745	-1.44114	0.390083	3.69446	0.000220355	0.00424702
WBGene00022042	1934	icd-2	53826.1	-0.30534	0.0826475	3.69449	0.000220328	0.00424702
WBGene00019655	3855	K11G9.5	400.883	-0.726142	0.196625	3.69302	0.000221606	0.00426661
WBGene00004014	5058	phb-1	19176.9	-0.327502	0.0889259	3.68286	0.000230628	0.0044124
WBGene00004491	607	rps-22	46338.8	-0.424399	0.115316	3.68032	0.000232945	0.0044474
WBGene00021930	4920	Y55F3AM.13	8433.6	-0.372753	0.101298	3.67976	0.00023345	0.00445238
WBGene00045399	9425	Y47G6A.33	1890.66	-0.419106	0.113972	3.67726	0.000235756	0.00449166
WBGene00001478	10495	fmo-3	702.019	-0.74522	0.202842	3.6739	0.000238877	0.00454639
WBGene00000727	512	col-154	426.04	-0.826928	0.225225	3.67156	0.00024107	0.00457858
WBGene00020269	3870	erfa-1	27198.2	-0.300611	0.0819095	3.67004	0.000242515	0.0045936
WBGene00009773	13630	lipl-2	536.304	-0.787964	0.214763	3.66899	0.000243508	0.0046057
WBGene00004474	1574	rps-5	94413.9	-0.411236	0.11223	3.66423	0.000248088	0.0046778
WBGene00019473	5860	cyp-35A5	275.646	-0.638567	0.174296	3.66369	0.000248605	0.00467857
WBGene00014994	1278	ZK1225.7	141.011	-1.16793	0.318999	3.66124	0.000250994	0.00471797
WBGene00010690	6198	K08H2.3	1008.89	-0.466698	0.127688	3.65498	0.000257205	0.00480995
WBGene00009308	13107	F32A11.3	276.754	-0.881165	0.241563	3.64777	0.000264526	0.0049317
WBGene00022219	6421	Y73B3A.18	1098.54	-0.832034	0.228579	3.64003	0.000272602	0.00506673
WBGene00000596	8496	col-7	312.336	-1.14275	0.314114	3.638	0.000274759	0.00510163
WBGene00022176	426	Y71H2AM.11	5312.69	-0.363475	0.0999904	3.6351	0.000277877	0.00514904
WBGene00004436	1091	rpl-24.1	79471.5	-0.436246	0.120104	3.63223	0.000280979	0.00520125
WBGene00018418	7833	F44E2.4	299.11	-0.969216	0.267217	3.62708	0.000286646	0.00530077
WBGene00004698	3588	rsp-1	15259.7	-0.366545	0.101302	3.61834	0.000296497	0.00544433
WBGene00015894	15687	acdh-2	669.639	-0.915954	0.253531	3.61279	0.000302922	0.00555671
WBGene00020715	9869	nspd-4	125.593	-1.30447	0.361457	3.60892	0.00030747	0.00563449
WBGene00021249	17777	Y22D7AL.11	122.182	-1.04799	0.290507	3.60744	0.000309229	0.00566102
WBGene00018930	19745	F56B3.6	173.618	-1.05278	0.291873	3.60697	0.000309794	0.0056657
WBGene00003831	7567	nuo-1	26667.7	-0.275757	0.0764627	3.60643	0.000310435	0.00567174
WBGene00016624	4314	hrpl-1	3683.6	-0.301838	0.0837406	3.60444	0.000312823	0.00570394
WBGene00010135	5657	F55H12.4	8920.81	-0.660822	0.183364	3.60387	0.00031351	0.00571077
WBGene00016440	11747	gipc-1	937.438	-0.671254	0.186403	3.60109	0.000316883	0.00576505
WBGene00007985	9623	swah-1	3132.05	-0.393419	0.109256	3.6009	0.000317122	0.00576505
WBGene00016907	3311	C53H9.2	16978.7	-0.324547	0.0905141	3.58559	0.000336315	0.00608367
WBGene00007762	3133	C27B7.5	5663.34	-0.357507	0.0997542	3.58388	0.000338528	0.00610749
WBGene00012481	2756	Y18D10A.11	15637.3	-0.331882	0.092634	3.58272	0.000340034	0.00612665
WBGene00008754	18586	F13E9.5	37.1593	-2.29074	0.639816	3.58031	0.000343187	0.00617736
WBGene00000878	10489	cyn-2	287.369	-0.862601	0.241245	3.57562	0.0003494	0.00627681
WBGene00013874	4759	ZC376.2	2806.18	-0.574071	0.160838	3.56926	0.000357994	0.00642488
WBGene00019022	8338	F58A6.1	880.596	-0.797635	0.223582	3.56753	0.000360357	0.00646094
WBGene00020989	1416	W03D8.8	302.197	-1.04254	0.292363	3.56591	0.000362596	0.00649469
WBGene00044719	14360	clec-172	36.468	-1.89415	0.531751	3.56209	0.000367909	0.00657695
WBGene00004922	11046	snt-2	1437.65	-0.706055	0.198199	3.56235	0.00036755	0.00657695
WBGene00017382	9804	F11D5.5	26.9693	-2.16852	0.609112	3.56013	0.000370669	0.00661982
WBGene00009471	19608	F36D3.5	69.018	-1.27763	0.359937	3.54958	0.000385844	0.00685061
WBGene00000122	1000	aly-3	15944.6	-0.299438	0.0844572	3.54544	0.00039196	0.00693223
WBGene00016399	14712	C34D4.3	189.799	-0.928372	0.261911	3.54461	0.000393195	0.00694062
WBGene00004216	1082	ptr-1	527.596	-0.65589	0.185039	3.54461	0.000393188	0.00694062
WBGene00017051	12742	afmd-1	305.601	-0.579137	0.163433	3.54356	0.000394761	0.00696152
WBGene00010478	1187	K01G5.5	27564.3	-0.49444	0.139558	3.5429	0.000395757	0.00697234
WBGene00018811	12275	pmt-2	19341.6	-0.523448	0.147817	3.54118	0.000398337	0.00700429
WBGene00016361	21681	drd-10	152.378	-1.36543	0.38605	3.53692	0.000404823	0.00711149
WBGene00006725	2618	ubl-1	53371.7	-0.440567	0.124587	3.53623	0.000405887	0.00712331
WBGene00013143	7733	Y53C12B.1	6877.31	-0.294885	0.0834228	3.53482	0.000408048	0.00715437
WBGene00010055	15613	F54D5.12	10987	-0.335567	0.0950176	3.53163	0.000413	0.0072273
WBGene00021678	17269	Y48G1C.5	88.3544	-1.41015	0.40042	3.52168	0.000428826	0.00744694
WBGene00001037	2520	dnj-19	26294.4	-0.267161	0.0761999	3.50606	0.000454796	0.0078533
WBGene00003456	8544	msp-63	45.3904	-2.02656	0.578323	3.5042	0.000457988	0.0078779
WBGene00006044	15044	ssp-16	113.192	-1.25764	0.360074	3.49273	0.000478105	0.00817076
WBGene00017736	3337	F23C8.7	105.241	-1.14089	0.326958	3.48941	0.000484093	0.00824992
WBGene00001155	11994	ech-6	17567	-0.446937	0.128415	3.4804	0.000500674	0.00850867
WBGene00010627	2710	nol-56	32136	-0.578215	0.16639	3.47506	0.000510744	0.00863158
WBGene00021594	915	tig-3	83.7894	-1.21382	0.349661	3.47143	0.000517694	0.00874094
WBGene00010245	209	F58D5.6	11.5103	-5.70527	1.64398	3.47039	0.000519696	0.00875045
WBGene00019029	358	F58B6.1	184.438	-1.35084	0.389224	3.4706	0.000519292	0.00875045
WBGene00010091	18620	ssp-35	183.5	-0.968248	0.27911	3.46906	0.000522284	0.00877784
WBGene00008341	6149	ttr-44	2341.56	-0.719957	0.207638	3.46737	0.000525578	0.00880886
WBGene00014247	9751	ZK1307.4	137.724	-1.16556	0.336373	3.46507	0.000530095	0.00887641
WBGene00009271	19084	glna-3	407.831	-0.598425	0.173016	3.45878	0.000542629	0.00906966
WBGene00004431	1088	rpl-19	131200	-0.363739	0.105359	3.45239	0.000555648	0.00921135
WBGene00020894	1903	T28D9.1	12239.5	-0.377032	0.10935	3.44795	0.000564869	0.00935571
WBGene00021040	903	W05G11.2	122.843	-1.19494	0.346951	3.44411	0.000572941	0.00943801
WBGene00004026	5059	phy-3	109.702	-1.07788	0.313247	3.44098	0.000579602	0.00953053
WBGene00022708	12856	ZK354.7	78.2413	-1.30624	0.380274	3.435	0.000592548	0.00972589
WBGene00021997	11853	Y59E9AR.1	28.0867	-2.33727	0.680513	3.43458	0.000593482	0.00973247
WBGene00001912	2538	his-38	90.3324	-1.55912	0.455632	3.42188	0.000621903	0.010162
WBGene00021002	5892	W03F9.4	127.882	-1.60844	0.470395	3.41934	0.000627727	0.0102388
WBGene00001477	1039	fmo-2	399.627	-1.47991	0.432878	3.41877	0.000629048	0.0102512
WBGene00007082	9609	acs-10	149.355	-0.854236	0.250179	3.4145	0.000638985	0.0103761
WBGene00001713	17490	grl-4	1642.29	-0.705157	0.206508	3.41467	0.000638598	0.0103761
WBGene00017484	1827	F15E6.3	892.773	-0.775448	0.227175	3.41344	0.00064149	0.0104075
WBGene00004430	591	rpl-18	88688.8	-0.510211	0.149535	3.41199	0.000644908	0.0104537
WBGene00011401	13145	T03F6.6	106.072	-1.16673	0.34209	3.41059	0.00064822	0.0104981
WBGene00044616	10393	M01A12.4	31.4643	-1.90871	0.559986	3.40849	0.000653246	0.0105341
WBGene00001232	12999	eif-3.I	12983.4	-0.304982	0.0896759	3.40094	0.000671557	0.0108089
WBGene00009948	13637	F52H3.6	184.422	-1.14477	0.336705	3.39992	0.000674054	0.0108395
WBGene00007341	3616	C05D12.4	152.759	-0.812326	0.239009	3.39873	0.000676999	0.0108696
WBGene00004427	589	rpl-15	97265.7	-0.318899	0.093857	3.39771	0.000679524	0.0108987
WBGene00017975	7315	F32B5.1	106.41	-1.17034	0.344552	3.3967	0.000682027	0.0109292
WBGene00016698	7288	C46A5.1	94.5739	-1.40876	0.415331	3.3919	0.000694104	0.011113
WBGene00022754	10376	nspd-1	316.469	-1.24333	0.366591	3.39159	0.000694895	0.0111159
WBGene00012364	17630	zmp-4	2607.96	-0.337351	0.0995061	3.39025	0.000698285	0.0111506
WBGene00015306	5757	C01G5.4	55.3668	-1.79875	0.530811	3.38868	0.000702307	0.011205
WBGene00019597	8840	K09H9.5	189.144	-0.692382	0.204391	3.38754	0.000705227	0.0112319
WBGene00009321	13619	F32B6.4	121.298	-1.15417	0.34106	3.38407	0.000714203	0.0113452
WBGene00000118	8488	alh-12	4072.16	-0.532605	0.157544	3.38067	0.000723097	0.0114765
WBGene00017488	18731	dct-7	34.8686	-2.98268	0.882487	3.37985	0.000725246	0.0114817
WBGene00006675	21525	twk-22	609.075	-0.555872	0.164716	3.37473	0.00073889	0.0116562
WBGene00021358	18815	Y37E11AL.2	66.0611	-1.38713	0.41107	3.37444	0.000739652	0.0116581
WBGene00020360	3394	math-41	462.056	-0.715502	0.212121	3.37309	0.000743303	0.0116955
WBGene00012605	22646	Y38F1A.1	148.349	-0.925332	0.274364	3.37264	0.000744508	0.0117044
WBGene00013858	7753	ssp-34	147.01	-1.35307	0.401724	3.36817	0.000756693	0.0118531
WBGene00012925	15172	wht-8	56.0527	-1.37869	0.409473	3.36698	0.000759964	0.0118859
WBGene00003451	2051	msp-58	9.64128	-3.66083	1.08757	3.36608	0.000762457	0.0119147
WBGene00013684	17652	Y105E8A.27	64.1383	-1.22346	0.363927	3.36183	0.000774284	0.0120685
WBGene00004424	66	rpl-12	76775	-0.354531	0.106181	3.33893	0.000841016	0.0129647
WBGene00007963	10591	cyp-25A1	860.359	-0.632424	0.189511	3.33714	0.000846442	0.0130264
WBGene00015917	15215	C17G10.3	50.34	-1.568	0.470424	3.33317	0.000858635	0.0132029
WBGene00022856	19801	cth-2	12476.5	-0.383343	0.115113	3.33014	0.000868013	0.0133358
WBGene00014169	18154	ZK945.7	213.884	-0.73338	0.220357	3.32814	0.000874283	0.0133983
WBGene00013696	6733	Y106G6A.4	231.227	-0.922949	0.277633	3.32435	0.00088624	0.0135588
WBGene00009470	12603	F36D3.4	163.649	-1.0371	0.312592	3.31773	0.000907532	0.0138382
WBGene00007601	12064	C15C6.2	522.466	-0.768681	0.232095	3.31192	0.000926583	0.0140699
WBGene00017386	5816	nspd-5	218.899	-1.26141	0.380917	3.3115	0.000927971	0.0140792
WBGene00008556	3155	F07D3.3	7.5319	-5.93077	1.79186	3.30984	0.000933481	0.0141276
WBGene00014164	8257	lact-2	1653.96	-0.655705	0.19819	3.30846	0.000938108	0.0141741
WBGene00045355	22371	D1086.17	212.894	-0.787875	0.238519	3.3032	0.000955877	0.0143949
WBGene00004990	12040	spp-5	16638	-0.546257	0.165506	3.30052	0.000965055	0.0145092
WBGene00010477	7677	enu-3.6	297.012	-0.859518	0.260521	3.29923	0.00096949	0.0145639
WBGene00010148	7666	F56D5.3	1406.23	-0.632191	0.191885	3.29463	0.000985507	0.0147802
WBGene00000683	2512	col-109	559.1	-0.979586	0.297889	3.28843	0.00100749	0.0150382
WBGene00021779	22325	Y51H7C.1	1029.02	-0.902168	0.274465	3.28701	0.00101257	0.0150856
WBGene00015688	15684	C10G11.8	681.578	-0.713147	0.216988	3.28657	0.00101414	0.0150856
WBGene00004495	609	rps-26	50814.9	-0.353157	0.107452	3.28664	0.00101391	0.0150856
WBGene00022245	4925	acp-6	22666.1	-0.271159	0.0825561	3.28454	0.00102148	0.015163
WBGene00077558	10408	T06D10.3	23.4743	-1.88477	0.574072	3.28316	0.00102651	0.0152201
WBGene00004482	76	rps-13	28156	-0.358502	0.109234	3.28197	0.00103083	0.0152717
WBGene00021286	397	tald-1	10900.4	-0.267827	0.0818442	3.2724	0.00106639	0.0157092
WBGene00021472	14321	Y39G10AR.16	141.572	-1.17033	0.3582	3.26724	0.00108601	0.0159725
WBGene00000743	5506	col-170	163.767	-1.08682	0.333359	3.26021	0.00111328	0.0163079
WBGene00021772	1420	math-45	17.5074	-2.31943	0.712591	3.25492	0.00113422	0.0165482
WBGene00007681	10583	C18D11.3	9098.52	-0.251567	0.0775277	3.24487	0.00117503	0.0170618
WBGene00007264	14560	C02F4.4	32.8354	-3.28738	1.01359	3.24331	0.00118151	0.0171347
WBGene00016653	3793	ssb-1	22452.5	-0.339801	0.104778	3.24307	0.0011825	0.0171347
WBGene00015037	5746	B0212.3	1055.91	-0.431682	0.133218	3.24042	0.00119354	0.0172755
WBGene00004408	583	rla-0	190122	-0.495122	0.152839	3.23951	0.00119735	0.017317
WBGene00009962	12612	F53B6.7	118.642	-1.23091	0.380004	3.2392	0.00119865	0.017322
WBGene00004448	1092	rpl-34	31125.4	-0.402033	0.124193	3.23715	0.00120731	0.0174196
WBGene00021123	1912	W09G12.9	635.707	-0.667677	0.206724	3.2298	0.00123879	0.0178174
WBGene00000714	8992	col-141	119.528	-1.14078	0.353289	3.22902	0.00124214	0.0178516
WBGene00013033	22653	Y49E10.10	80.7388	-1.38841	0.430317	3.22647	0.00125326	0.0179689
WBGene00000671	8991	col-96	940.127	-0.632327	0.196092	3.22464	0.00126131	0.0180561
WBGene00255375	16960	F08B4.8	305.209	-1.01131	0.31378	3.22298	0.00126863	0.0181466
WBGene00014665	14686	C04G2.3	98.6083	-1.45587	0.451773	3.22258	0.00127044	0.0181582
WBGene00002183	3544	kat-1	16371	-0.43479	0.135186	3.21624	0.00129884	0.0185351
WBGene00022110	424	Y71F9AL.4	634.905	-0.552903	0.172261	3.20969	0.00132877	0.0189031
WBGene00010295	1684	fbxa-193	858.59	-0.350225	0.109148	3.20872	0.00133328	0.0189526
WBGene00008936	10610	papl-1	2566.96	-0.512304	0.159805	3.2058	0.00134686	0.0191157
WBGene00018792	19251	F54C1.8	45.6082	-1.59728	0.498741	3.20261	0.00136187	0.0192988
WBGene00004412	4578	rpl-1	85562.6	-0.416603	0.130079	3.20268	0.00136154	0.0192988
WBGene00045493	11892	F55G7.4	14.7658	-2.92424	0.913536	3.20101	0.00136948	0.0193413
WBGene00004414	62	rpl-3	239641	-0.420017	0.131221	3.20083	0.00137031	0.0193413
WBGene00020713	19288	T23B3.5	314.142	-0.895014	0.279691	3.20001	0.00137423	0.0193687
WBGene00007384	19052	swt-3	844.308	-0.758124	0.236953	3.19947	0.00137681	0.0193751
WBGene00021969	17792	Y57G7A.6	218.537	-1.00603	0.314513	3.19868	0.00138058	0.0193982
WBGene00004455	5560	rpl-42	11.1071	-3.34702	1.04649	3.19832	0.00138228	0.0194073
WBGene00010303	3199	cri-3	14056.5	-0.295666	0.092479	3.19712	0.00138809	0.0194589
WBGene00014770	23648	F54F3.2	23.3461	-2.18329	0.682946	3.19688	0.00138925	0.0194601
WBGene00008707	16564	F11E6.3	37438.5	-0.75817	0.237642	3.19039	0.00142082	0.0197961
WBGene00002095	2543	ins-12	30.5985	-1.94719	0.610571	3.18913	0.00142701	0.0198672
WBGene00016420	7278	C34G6.3	51.7552	-1.5729	0.494075	3.18353	0.00145494	0.0202097
WBGene00016006	305	fln-2	5400.11	-1.06048	0.333462	3.18022	0.00147165	0.0203952
WBGene00017743	10771	F23F1.2	21.045	-3.04824	0.959032	3.17845	0.00148063	0.0204696
WBGene00021492	13829	comt-5	108.192	-1.30323	0.410454	3.17508	0.00149793	0.0206498
WBGene00013594	11198	Y87G2A.2	1171.2	-0.735812	0.232074	3.17059	0.00152129	0.0208928
WBGene00012871	7724	Y45F10B.3	25.9921	-2.20439	0.697255	3.16153	0.00156944	0.0214252
WBGene00007124	12055	B0250.7	1198.95	-0.432023	0.136665	3.16119	0.00157127	0.021434
WBGene00004445	596	rpl-31	40121.6	-0.463712	0.146759	3.15969	0.00157938	0.0215286
WBGene00020660	18796	T21G5.2	77.1644	-1.26616	0.400785	3.15921	0.00158199	0.0215482
WBGene00009592	2676	F40F12.3	56.5811	-1.19615	0.378789	3.15782	0.00158954	0.0216026
WBGene00012809	18130	Y43F8A.2	194.712	-0.989268	0.313301	3.15756	0.00159096	0.0216058
WBGene00017246	6335	F08D12.2	142.614	-0.826144	0.261819	3.1554	0.00160279	0.0217342
WBGene00003460	11530	msp-71	51.1084	-1.58005	0.500926	3.15427	0.00160901	0.0217861
WBGene00016382	14711	C33H5.16	25.6473	-2.01485	0.638834	3.15394	0.00161082	0.0217944
WBGene00000915	2517	hsp-90	296813	-0.240229	0.0763276	3.14735	0.00164759	0.0222754
WBGene00012937	18666	Y47D3A.31	81.1766	-1.18354	0.376155	3.14642	0.00165282	0.0222966
WBGene00001430	9519	fkb-5	1194.73	-0.476226	0.151438	3.1447	0.00166257	0.0224116
WBGene00013236	3738	Y56A3A.18	1772.36	-0.379987	0.120865	3.1439	0.00166713	0.0224399
WBGene00018121	15250	F36H12.5	66.7925	-1.47601	0.469567	3.14334	0.00167031	0.0224661
WBGene00021010	18801	W03G1.2	30.2662	-1.92008	0.611628	3.13929	0.00169358	0.0227455
WBGene00000771	16476	cpb-2	97.3419	-1.03077	0.328406	3.13871	0.00169695	0.0227741
WBGene00013179	23546	clec-100	4.07855	-5.98008	1.90583	3.13779	0.00170226	0.0228285
WBGene00006928	6589	vit-4	276665	-1.04808	0.334361	3.13458	0.00172099	0.0230458
WBGene00016322	13222	C32E8.4	52.7479	-2.05726	0.656648	3.13298	0.00173043	0.0230875
WBGene00021351	2912	eif-2alpha	20463.3	-0.194875	0.06227	3.12951	0.00175097	0.0233275
WBGene00020911	6872	cpt-6	1394.37	-0.35823	0.114594	3.12609	0.0017715	0.0235495
WBGene00022634	14341	ZC581.7	57.7636	-1.84279	0.589997	3.12339	0.00178778	0.0237313
WBGene00009193	6644	F27E5.3	26.761	-2.38779	0.764925	3.1216	0.00179868	0.0238587
WBGene00004999	9575	spp-14	15337.1	-0.515374	0.165277	3.11824	0.00181932	0.024115
WBGene00018765	8821	mpc-2	2961.17	-0.371484	0.119289	3.11414	0.00184479	0.0243641
WBGene00255605	15966	T23B3.8	7.07434	-5.34873	1.71968	3.11031	0.00186891	0.0246113
WBGene00021650	15818	Y47G6A.26	43.6669	-1.91805	0.61742	3.10655	0.00189284	0.024852
WBGene00002193	14496	kin-5	79.4657	-1.16549	0.375178	3.10649	0.00189325	0.024852
WBGene00000618	12985	col-41	94.9063	-1.58946	0.511833	3.10542	0.00190008	0.024914
WBGene00001480	7522	fmo-5	806.421	-0.468687	0.151521	3.09323	0.00197993	0.0258681
WBGene00021768	19308	Y51F10.7	2581.01	-1.59786	0.516841	3.09158	0.00199091	0.0259743
WBGene00006952	1115	wrt-6	107.242	-1.391	0.450534	3.08744	0.00201888	0.0262454
WBGene00012173	15648	W01B6.6	39.8084	-1.39272	0.452132	3.08034	0.00206766	0.0268223
WBGene00007977	8613	gska-3	128.506	-0.918852	0.298365	3.07962	0.00207266	0.026868
WBGene00004447	597	rpl-33	41423.7	-0.370498	0.120398	3.07726	0.0020891	0.0270427
WBGene00013771	15186	Y113G7C.1	237.9	-0.961671	0.312686	3.07552	0.00210137	0.0271823
WBGene00012926	11184	Y47D3A.13	123.918	-0.821451	0.267131	3.07508	0.00210444	0.0272028
WBGene00020905	20606	T28H11.7	158.395	-1.16977	0.381349	3.06745	0.00215896	0.0278089
WBGene00010474	17113	K01D12.15	44.0123	-1.50195	0.490275	3.06349	0.00218775	0.0281005
WBGene00045265	454	K10C2.8	1352.65	-0.563316	0.183931	3.06264	0.0021939	0.0281597
WBGene00007792	21542	C28D4.4	25.0542	-2.18679	0.714108	3.06227	0.00219663	0.0281748
WBGene00007987	10107	C36H8.1	111.813	-1.25688	0.410716	3.06021	0.00221182	0.0283299
WBGene00000718	8993	col-145	427.854	-0.854392	0.279861	3.05291	0.00226632	0.0289467
WBGene00077557	18877	F15D3.9	5.56844	-5.47521	1.79368	3.0525	0.00226941	0.028966
WBGene00020285	8853	T06A10.2	15.8106	-2.38396	0.781865	3.04907	0.00229552	0.0292787
WBGene00021335	18812	spp-23	764.369	-0.98867	0.324282	3.0488	0.00229759	0.0292846
WBGene00014069	9745	ZK678.3	20.3273	-2.22635	0.731147	3.04501	0.00232675	0.0295737
WBGene00016807	15236	C50D2.3	25.3015	-2.1708	0.713574	3.04215	0.00234893	0.0298348
WBGene00010650	9173	K08C9.1	62.5679	-1.35421	0.445463	3.04001	0.00236572	0.0300063
WBGene00011599	730	T07G12.8	453.746	-0.497427	0.163679	3.03903	0.00237337	0.0300408
WBGene00019562	22765	K09C6.8	16.1954	-2.79447	0.919683	3.03852	0.00237747	0.030051
WBGene00000678	6008	col-104	612.396	-0.725517	0.238802	3.03815	0.00238037	0.0300668
WBGene00021787	14803	Y51H7C.9	70.9086	-1.38455	0.455998	3.0363	0.002395	0.0302307
WBGene00016058	17685	nspd-3	113.232	-1.83844	0.60628	3.03232	0.0024268	0.0305287
WBGene00007361	13075	oac-3	172.015	-1.24963	0.412101	3.03233	0.00242672	0.0305287
WBGene00022159	3437	mppa-1	3972.83	-0.266182	0.0877768	3.03249	0.00242545	0.0305287
WBGene00008514	3641	mrpl-44	22406.4	-0.199273	0.0657167	3.0323	0.00242698	0.0305287
WBGene00022439	7898	Y110A2AL.2	35.3192	-3.53212	1.16507	3.03169	0.00243192	0.0305627
WBGene00011748	8204	T13F2.9	446.065	-0.849427	0.280196	3.03155	0.00243303	0.0305627
WBGene00000217	9487	asp-4	23941.9	-0.278331	0.0918307	3.03092	0.00243811	0.0305719
WBGene00003148	44	mbf-1	11891.8	-0.215394	0.0710725	3.03063	0.00244046	0.0305719
WBGene00000647	6996	col-71	1078.86	-0.749654	0.247491	3.02902	0.00245349	0.0307141
WBGene00010114	3192	F55D12.6	55.2325	-2.17104	0.717037	3.0278	0.00246341	0.0308081
WBGene00011968	21621	T23G11.1	236.67	-0.750574	0.248021	3.02626	0.00247601	0.0309323
WBGene00008708	22054	F11E6.4	72.1226	-1.2042	0.398141	3.02456	0.00248996	0.0310532
WBGene00001843	17493	hgo-1	4716.33	-0.535967	0.17721	3.02448	0.00249064	0.0310532
WBGene00004475	605	rps-6	93157.9	-0.364137	0.120479	3.02242	0.00250765	0.0312207
WBGene00003063	3552	lpd-7	17285.1	-0.304849	0.10089	3.02161	0.00251434	0.0312614
WBGene00000830	8995	ctl-1	1254.18	-0.654391	0.216636	3.0207	0.00252191	0.0313128
WBGene00018745	7842	F53C3.1	28.7148	-2.0012	0.663159	3.01768	0.00254714	0.0316046
WBGene00007248	11587	catp-4	334.028	-0.875801	0.290383	3.01602	0.00256118	0.0316528
WBGene00001598	1041	glh-1	44853.6	-0.483432	0.160255	3.01663	0.002556	0.0316528
WBGene00004442	69	rpl-28	42030.1	-0.376025	0.124761	3.01396	0.00257865	0.0318226
WBGene00018516	21184	gakh-1	769.08	-0.739246	0.245322	3.01337	0.00258367	0.0318629
WBGene00018178	22744	F38E1.3	30.6879	-1.92541	0.639131	3.01254	0.00259067	0.0319277
WBGene00004189	59	pars-1	22599.8	-0.285274	0.0947703	3.01016	0.00261109	0.032136
WBGene00003585	15506	ndx-8	214.7	-0.719594	0.239205	3.00827	0.00262736	0.0323145
WBGene00004875	11044	smd-1	5457.58	-0.57375	0.190835	3.00653	0.0026425	0.0324351
WBGene00009656	1167	F43G6.3	2311.66	-0.334617	0.111305	3.00629	0.00264457	0.0324386
WBGene00013289	4747	tag-273	2214.74	-0.321371	0.106919	3.00575	0.00264931	0.0324642
WBGene00009119	1157	ndk-1	70245.3	-0.357871	0.119129	3.00405	0.00266409	0.0325963
WBGene00010381	17109	H12D21.5	26.2521	-2.06003	0.686439	3.00104	0.00269059	0.0328054
WBGene00009005	22592	F21C3.6	25.0355	-1.98947	0.662966	3.00086	0.0026922	0.0328054
WBGene00044219	7911	F28F8.10	147.526	-0.658904	0.21954	3.00129	0.00268838	0.0328054
WBGene00015044	14202	cyp-34A9	465.944	-0.641269	0.213898	2.99801	0.0027175	0.0330666
WBGene00016235	2823	C29H12.2	13530.3	-0.398189	0.132973	2.9945	0.00274892	0.0334043
WBGene00015097	12208	B0273.1	104.059	-1.00879	0.336919	2.99418	0.00275188	0.033418
WBGene00010786	9680	K12D12.4	35.9538	-2.07599	0.693587	2.99312	0.00276142	0.0334894
WBGene00017078	14718	D2096.11	878.467	-0.587093	0.196267	2.99129	0.002778	0.0336233
WBGene00012189	7708	W02A2.4	18.5486	-2.29029	0.766289	2.98881	0.00280064	0.0338525
WBGene00019626	7857	K10C9.7	52.9564	-1.68468	0.564261	2.98563	0.00282994	0.0341163
WBGene00044605	953	ttr-36	940.616	-0.806779	0.270273	2.98505	0.00283529	0.0341583
WBGene00004449	1571	rpl-35	55592.1	-0.319064	0.107	2.9819	0.00286464	0.0344436
WBGene00019965	3387	R08F11.1	1902.84	-0.725579	0.243571	2.97892	0.00289262	0.0346717
WBGene00001431	1035	fkb-6	21924.9	-0.259225	0.0870212	2.97887	0.00289311	0.0346717
WBGene00016884	8301	C52E2.5	173.027	-0.806693	0.27104	2.97629	0.0029176	0.0348965
WBGene00019410	17741	K05F1.9	147.819	-0.830361	0.27932	2.97279	0.00295107	0.0352203
WBGene00018448	17730	F45D11.1	48.3895	-1.54472	0.520187	2.96955	0.00298236	0.0354912
WBGene00003465	9030	msp-78	454.824	-0.952657	0.321878	2.95968	0.00307956	0.0365463
WBGene00017497	16678	irld-32	7.938	-4.88063	1.65289	2.95278	0.00314928	0.0372043
WBGene00020223	18246	T05A7.6	211.662	-1.03444	0.350922	2.94777	0.00320078	0.0377151
WBGene00017082	12244	DC2.5	677.332	-0.618985	0.20998	2.94783	0.00320014	0.0377151
WBGene00000381	1008	cct-6	33071.4	-0.194059	0.0658997	2.94476	0.003232	0.0379604
WBGene00020007	14289	R11F4.1	3513.65	-0.476746	0.161972	2.94338	0.00324646	0.0381058
WBGene00017071	8781	aagr-1	5326.75	-0.322835	0.109694	2.94305	0.00324994	0.038122
WBGene00013592	11197	Y81G3A.4	24.3774	-2.48746	0.846385	2.93892	0.00329359	0.0385876
WBGene00015992	4301	C18H2.5	51.583	-1.44077	0.490294	2.93859	0.00329714	0.0385896
WBGene00012357	22123	W09D6.4	88.565	-1.42641	0.485424	2.93848	0.00329825	0.0385896
WBGene00016183	2822	C28F5.1	3.78783	-5.65978	1.92655	2.93778	0.00330569	0.0386518
WBGene00008933	2155	F18A11.6	265.04	-0.583283	0.198789	2.93419	0.00334425	0.0390526
WBGene00219912	13963	F22H10.10	14.2476	-2.42732	0.828451	2.92995	0.00339014	0.0394527
WBGene00004483	77	rps-14	71460.2	-0.288092	0.0983305	2.92983	0.00339148	0.0394527
WBGene00016462	12731	C35E7.10	121.751	-1.10167	0.376682	2.92466	0.0034483	0.0400117
WBGene00013713	5733	Y106G6G.4	200.862	-1.00221	0.342722	2.92425	0.00345286	0.040034
WBGene00012177	11681	decr-1.2	74.6947	-0.961565	0.328938	2.92324	0.00346407	0.0400927
WBGene00001686	3030	gpd-4	14228.2	-0.448993	0.153623	2.92269	0.00347024	0.0401387
WBGene00008590	14590	F08H9.2	227.463	-0.900104	0.308175	2.92076	0.00349183	0.0403628
WBGene00013844	5245	fbxa-50	56.8467	-1.69664	0.581332	2.91854	0.0035168	0.0406257
WBGene00020237	5876	phat-4	521.1	-0.73276	0.251118	2.918	0.00352289	0.0406447
WBGene00009416	14602	F35E2.9	86.5895	-0.990209	0.339376	2.91773	0.00352587	0.0406533
WBGene00003065	14501	lpd-9	4517.87	-0.271733	0.0931796	2.91623	0.00354288	0.0407979
WBGene00020744	897	T24A6.1	142.533	-0.749954	0.257307	2.91462	0.00356117	0.0409826
WBGene00013819	2788	Y116F11A.6	91.7976	-1.37638	0.472287	2.91429	0.00356498	0.0410007
WBGene00010832	17605	M02G9.3	17.9177	-4.86633	1.67095	2.91231	0.00358766	0.0412095
WBGene00000606	510	col-17	666.918	-0.885763	0.304905	2.90505	0.00367199	0.0420196
WBGene00044402	14352	Y82E9BL.18	151.015	-0.912178	0.314591	2.89957	0.00373672	0.0425203
WBGene00007180	6125	B0457.6	476.626	-0.663865	0.229087	2.89787	0.00375704	0.0426718
WBGene00020116	13813	moa-1	117.464	-0.884654	0.306036	2.89069	0.003844	0.0434163
WBGene00011107	22101	R07E3.6	162.309	-1.01591	0.351792	2.8878	0.00387945	0.0437687
WBGene00044569	18317	C25F6.8	44.1867	-4.76011	1.65049	2.88405	0.00392591	0.0441773
WBGene00022753	22342	ZK484.7	53.4029	-1.46623	0.508383	2.88411	0.00392523	0.0441773
WBGene00020284	1399	mel-46	6115.46	-0.287451	0.0997958	2.88039	0.00397181	0.0445872
WBGene00020761	2403	T24C4.5	3494.95	-0.247074	0.0861204	2.86893	0.00411859	0.045949
WBGene00010336	18625	acox-1.6	992.112	-0.43387	0.151317	2.86729	0.00414007	0.0461323
WBGene00043147	22346	nspd-6	116.482	-0.949063	0.331332	2.86439	0.00417814	0.0464996
WBGene00006463	2609	nduf-2.2	10380.4	-0.228356	0.0797591	2.86307	0.00419555	0.0466365
WBGene00011046	9180	R05H10.7	12.594	-3.03623	1.06088	2.86199	0.00420992	0.0466889
WBGene00001175	6019	egl-6	482.626	-0.44892	0.156843	2.86222	0.00420681	0.0466889
WBGene00000107	12977	alh-1	22130.1	-0.24125	0.084338	2.86052	0.00422953	0.0468146
WBGene00003596	3060	ngp-1	11506.4	-0.31996	0.111942	2.85826	0.00425969	0.0470629
WBGene00012714	4737	abce-1	17110.9	-0.21726	0.0760491	2.85684	0.00427888	0.0472463
WBGene00021907	14805	Y55B1AR.3	5.37374	-5.16303	1.80913	2.85388	0.0043189	0.0475444
WBGene00022445	1436	Y110A2AL.9	62.82	-1.58083	0.554762	2.84955	0.00437805	0.0481085
WBGene00012251	1226	clec-49	748.561	-0.576623	0.202436	2.84842	0.00439369	0.0481933
WBGene00017059	4823	msrp-5	115.61	-1.15778	0.406722	2.8466	0.00441884	0.0483529
WBGene00023401	7908	ZK380.t2	120.035	-1.1882	0.417576	2.84548	0.00443446	0.0484657
WBGene00219374	15941	C25A11.10	762.216	-0.413701	0.145381	2.84563	0.00443239	0.0484657
WBGene00022160	18827	Y71G12B.25	239.803	-0.581519	0.204457	2.84421	0.00445214	0.0486298
WBGene00004413	586	rpl-2	144680	-0.467434	0.164432	2.84271	0.00447312	0.0487714
WBGene00019165	13271	mpz-4	74.5299	-1.15685	0.407353	2.83993	0.00451234	0.0491404
WBGene00011408	3693	nifk-1	8097.47	-0.32242	0.113673	2.83639	0.0045627	0.0496296
WBGene00005013	13038	jmjd-1.1	29.4202	-1.76282	0.621663	2.83565	0.00457326	0.0496852
WBGene00018548	17731	clec-79	161.948	-1.09705	0.387018	2.83463	0.0045879	0.0497554
WBGene00016752	13234	C48E7.7	128.256	-1.04167	0.367814	2.83205	0.0046251	0.0500993
WBGene00002827	7035	let-653	261.979	-0.623695	0.220289	2.83125	0.0046366	0.0501941
WBGene00006052	13556	ssq-3	393.456	-0.970387	0.343071	2.82853	0.00467624	0.0504984
WBGene00012122	5700	T28C6.8	689.019	-0.549621	0.194324	2.82837	0.00467854	0.0504984
WBGene00004473	604	rps-4	118915	-0.454281	0.160584	2.82894	0.0046703	0.0504984
WBGene00011313	15139	T01B7.8	7.6252	-4.94582	1.74997	2.82623	0.00470993	0.0508071
WBGene00004456	2080	rpl-43	35638.3	-0.481878	0.170612	2.8244	0.0047369	0.0509182
WBGene00015799	6761	C15H9.3	9.36479	-3.34838	1.18605	2.82313	0.00475571	0.0510595
WBGene00015244	22188	B0524.5	9.70081	-3.00094	1.06485	2.81818	0.00482974	0.0517934
WBGene00018702	13783	F52E4.5	4035.41	-0.438594	0.155645	2.81792	0.00483361	0.0518044
WBGene00020386	18789	cyp-34A4	610.222	-0.420408	0.149231	2.81716	0.00484505	0.0518966
WBGene00001840	6040	hel-1	42058.5	-0.192263	0.0682745	2.81604	0.004862	0.0520476
WBGene00016085	17686	C25A8.5	50.7957	-1.33148	0.472934	2.81535	0.00487237	0.052067
WBGene00206459	1986	Y80D4G.1	978.86	-0.515228	0.183184	2.81262	0.00491398	0.0524414
WBGene00022621	13328	ZC477.7	130.742	-1.30495	0.464237	2.81095	0.00493951	0.05257
WBGene00002059	552	ife-1	14994.6	-0.256322	0.0911915	2.81081	0.00494167	0.05257
WBGene00007714	21053	C25D7.1	82.5903	-1.42027	0.505483	2.80974	0.00495817	0.0527062
WBGene00018575	18220	clec-119	71.1295	-1.22222	0.43504	2.80945	0.00496258	0.0527224
WBGene00017058	3318	msrp-6	93.8681	-1.38314	0.492465	2.80861	0.00497566	0.0527998
WBGene00044633	22363	F54H12.7	84.313	-1.15192	0.410129	2.80868	0.0049745	0.0527998
WBGene00010636	9172	K07F5.8	15.7188	-2.39425	0.852805	2.8075	0.00499272	0.0529193
WBGene00018124	19234	F36H12.10	12.7418	-3.57775	1.27503	2.80602	0.00501579	0.053127
WBGene00016481	13744	C36C5.12	64.3753	-1.31755	0.469613	2.8056	0.00502229	0.0531402
WBGene00000719	18972	col-146	485.673	-0.646953	0.230744	2.80377	0.00505084	0.0533495
WBGene00077682	10902	F58B4.7	6.22372	-5.08984	1.81835	2.79915	0.00512374	0.0539904
WBGene00010209	15116	fbxa-191	277.686	-0.538041	0.19222	2.79909	0.00512466	0.0539904
WBGene00011176	13138	R09E10.6	1097.8	-0.774382	0.276749	2.79814	0.00513981	0.0541014
WBGene00016852	12736	srt-7	5.75199	-5.16285	1.84593	2.79688	0.00515994	0.0542507
WBGene00016902	819	C53D5.1	1751.27	-0.315966	0.112969	2.79693	0.00515902	0.0542507
WBGene00010071	12121	sre-45	3.05968	-6.33731	2.26673	2.79579	0.00517725	0.0544014
WBGene00013886	20545	ZC412.5	18.0577	-2.04918	0.733202	2.79483	0.00519266	0.0545005
WBGene00004179	6089	prg-2	17452.9	-0.481229	0.172199	2.79461	0.00519628	0.0545072
WBGene00000638	6995	col-62	254.592	-1.06924	0.382813	2.79312	0.00522027	0.0546646
WBGene00003538	26554	nas-19	4.21675	-5.78421	2.07198	2.79163	0.00524437	0.0548854
WBGene00021899	3912	Y54H5A.1	13194.6	-0.23648	0.0848159	2.78816	0.00530091	0.055287
WBGene00016595	10743	C42D4.2	946.816	-0.58051	0.208345	2.7863	0.00533136	0.055541
WBGene00017714	2845	F22F1.2	42.6957	-1.21968	0.437803	2.78591	0.00533781	0.0555765
WBGene00020353	11321	T08B6.4	323.851	-0.612041	0.219726	2.78547	0.005345	0.0555881
WBGene00022700	6906	ZK353.4	25.3223	-1.8401	0.660952	2.78402	0.00536896	0.0556786
WBGene00013875	16084	ZC376.3	681.623	-0.342906	0.123164	2.78413	0.00536711	0.0556786
WBGene00020275	2897	atp-4	13687.5	-0.366968	0.131869	2.78282	0.00538891	0.0557903
WBGene00000672	7998	col-97	941.598	-0.66586	0.239374	2.78167	0.00540799	0.0559244
WBGene00022970	3455	CD4.10	830.715	-0.426898	0.153496	2.78116	0.00541648	0.0559805
WBGene00002000	7538	hrp-2	31666.8	-0.335175	0.12072	2.77647	0.00549522	0.056666
WBGene00044443	14831	ZC21.10	52.1033	-1.13288	0.408468	2.77349	0.00554588	0.057101
WBGene00021978	10855	Y58A7A.4	1866.95	-0.854274	0.308334	2.77061	0.00559508	0.0575008
WBGene00022327	19317	fbxa-15	45.9256	-1.71132	0.617911	2.76953	0.00561376	0.0576279
WBGene00050956	18343	C14A6.13	77.0868	-1.1861	0.428395	2.76871	0.00562796	0.0576763
WBGene00008230	20024	pfk-1.2	79.1993	-0.962941	0.348178	2.76566	0.00568085	0.058153
WBGene00009224	675	F28F8.7	708.135	-0.52292	0.189094	2.7654	0.00568526	0.0581655
WBGene00014179	17663	ZK1010.5	140.675	-1.08944	0.394097	2.76439	0.00570299	0.0583143
WBGene00012097	5697	abcf-2	34441	-0.335454	0.121459	2.76187	0.00574715	0.0586345
WBGene00016508	2312	C37H5.5	9024.72	-0.248667	0.0900599	2.76113	0.00576019	0.0587346
WBGene00021667	4402	snpc-3.2	418.186	-0.414594	0.150188	2.76051	0.00577119	0.0587811
WBGene00020759	17254	T24C4.3	11.1671	-3.55193	1.28753	2.75871	0.00580304	0.0590396
WBGene00000112	4493	alh-6	6049.77	-0.305517	0.11083	2.75662	0.00584023	0.0592793
WBGene00020940	8867	W02D7.4	266.974	-0.584332	0.212142	2.75444	0.00587923	0.0595377
WBGene00019129	1373	F59G1.8	1836.9	-0.294686	0.10699	2.75432	0.00588135	0.0595377
WBGene00022130	5423	Y71F9B.9	185.338	-0.700457	0.254329	2.75414	0.00588465	0.0595381
WBGene00013001	4250	Y48E1B.2	4804.92	-0.305955	0.111183	2.75181	0.00592665	0.059795
WBGene00013445	7743	Y66D12A.19	4432.19	-0.29253	0.106311	2.75164	0.00592971	0.059795
WBGene00022712	9399	ZK355.2	1628.74	-0.616952	0.224408	2.74924	0.00597332	0.0601684
WBGene00010289	5661	F58H1.6	107.812	-0.94352	0.343229	2.74895	0.00597862	0.0601885
WBGene00021420	6880	trap-3	13129.7	-0.3621	0.13175	2.7484	0.0059887	0.0602567
WBGene00011891	17619	del-6	6800.95	-0.341519	0.124283	2.74792	0.00599755	0.0603125
WBGene00023500	17821	C11H1.9	510.38	-0.476781	0.173657	2.74553	0.0060413	0.0606856
WBGene00044011	3939	T06E4.12	54.1697	-1.47758	0.538432	2.74422	0.00606543	0.0608276
WBGene00010035	10143	F54C8.1	115.492	-0.839682	0.306035	2.74374	0.00607433	0.0608834
WBGene00021837	10851	Y54E10BL.1	4.8442	-5.39629	1.96698	2.74344	0.00607985	0.0609052
WBGene00021835	18821	Y54E10A.17	1873.85	-0.697083	0.254152	2.74278	0.00609213	0.0609613
WBGene00020177	9352	T02H6.7	14.4669	-2.27515	0.829684	2.74219	0.00610302	0.0610369
WBGene00016702	815	C46A5.6	3388.85	-0.322713	0.117748	2.7407	0.00613078	0.0612139
WBGene00000114	12979	alh-8	37557	-0.648322	0.236601	2.74015	0.0061411	0.06125
WBGene00012316	8700	ctps-1	13731.6	-0.275252	0.100701	2.73336	0.00626919	0.0621876
WBGene00020183	887	T03D3.5	1563.77	-0.506385	0.185307	2.73268	0.00628214	0.0622823
WBGene00010628	11653	ceeh-2	857.648	-0.402646	0.147492	2.72995	0.00633432	0.0626634
WBGene00013138	22655	Y53C10A.10	82.6429	-0.91826	0.336506	2.7288	0.00635644	0.0627801
WBGene00018158	18738	comp-1	76.7169	-1.51371	0.555087	2.72698	0.00639177	0.0630051
WBGene00013716	10224	Y106G6H.1	888.897	-0.398377	0.146091	2.72691	0.00639302	0.0630051
WBGene00001387	17980	far-3	218.812	-0.636898	0.233579	2.7267	0.0063972	0.0630123
WBGene00001402	1033	fbf-2	2215.84	-0.352735	0.129475	2.72435	0.00644272	0.063324
WBGene00021886	21219	Y54G2A.21	330.131	-0.700928	0.257755	2.71936	0.00654092	0.0641995
WBGene00023490	21245	F36A2.14	109.409	-1.21888	0.448345	2.71861	0.00655563	0.0642261
WBGene00018615	15754	F48G7.4	310.226	-0.581286	0.213806	2.71876	0.00655272	0.0642261
WBGene00007913	17558	cyp-36A1	985.194	-0.488874	0.17981	2.71883	0.00655134	0.0642261
WBGene00018523	5349	lact-1	791.513	-0.426449	0.156926	2.71751	0.00657747	0.064371
WBGene00011325	7184	T01C3.11	40.235	-4.42117	1.62813	2.71549	0.00661783	0.0647313
WBGene00021377	10352	Y37E11B.5	3123.09	-0.342823	0.126414	2.71191	0.00668977	0.0653462
WBGene00003829	2060	nud-1	10603.3	-0.215212	0.079454	2.70864	0.00675605	0.0659067
WBGene00004094	10534	ppw-2	9430.73	-0.704178	0.260011	2.70827	0.00676357	0.0659448
WBGene00010066	1678	F54F7.6	647.533	-0.379871	0.140373	2.70616	0.00680668	0.0662943
WBGene00017718	5329	F22F4.5	347.013	-0.473886	0.175281	2.70357	0.0068598	0.0666694
WBGene00007448	11084	C08F8.6	127.758	-0.868997	0.32184	2.70009	0.00693198	0.0672634
WBGene00044391	18311	C25H3.15	9.00956	-4.87412	1.80619	2.69857	0.00696391	0.0674657
WBGene00022148	4414	ddx-27	8888.88	-0.244843	0.090728	2.69865	0.00696211	0.0674657
WBGene00010646	12622	K08C7.1	972.224	-0.389719	0.144519	2.69666	0.00700379	0.0677801
WBGene00004476	606	rps-7	111516	-0.254022	0.0942354	2.69561	0.00702601	0.067959
WBGene00017731	1832	F23C8.1	22.7237	-1.56008	0.578889	2.69496	0.00703969	0.0680042
WBGene00013700	21644	Y106G6D.3	214.016	-0.838269	0.311025	2.69518	0.00703512	0.0680042
WBGene00011214	19120	R10E9.2	527.447	-0.768386	0.285293	2.69332	0.00707437	0.0681739
WBGene00011830	10185	cyp-29A2	854.661	-0.391261	0.145326	2.69229	0.00709636	0.0682977
WBGene00016680	14714	C45G9.9	151.192	-0.920023	0.342127	2.68913	0.0071639	0.0688186
WBGene00014576	2797	Y43F11A.6	1166.38	-0.51625	0.192015	2.68859	0.00717535	0.0688562
WBGene00001234	4519	eif-6	8097.08	-0.368369	0.137058	2.68769	0.00719483	0.0689706
WBGene00004444	70	rpl-30	37655.6	-0.293788	0.109352	2.68663	0.00721764	0.0691167
WBGene00015931	15688	C17H12.5	101.588	-0.822376	0.306147	2.68621	0.00722677	0.0691678
WBGene00022699	9902	ZK353.3	10.0334	-4.79423	1.78693	2.68294	0.00729774	0.0695557
WBGene00044347	19815	Y71G12B.30	63.8678	-1.03784	0.38684	2.68286	0.00729947	0.0695557
WBGene00018543	19242	ugt-32	128.51	-0.963565	0.359117	2.68315	0.00729318	0.0695557
WBGene00195227	22398	Y71A12B.23	8.4774	-5.16254	1.92474	2.6822	0.00731403	0.0695899
WBGene00022739	6434	toe-1	14660.4	-0.413931	0.154607	2.67732	0.00742145	0.070185
WBGene00010510	13647	ent-3	107.591	-1.1803	0.441207	2.67517	0.00746911	0.0704892
WBGene00017060	19212	D2063.1	128.509	-1.06545	0.398349	2.67468	0.0074801	0.0705323
WBGene00013238	3262	trap-4	14000.7	-0.290417	0.108637	2.67328	0.00751139	0.0707355
WBGene00002025	548	hsp-60	26097.1	-0.484192	0.18115	2.67288	0.00752038	0.0707536
WBGene00019015	15263	F57F4.1	100.213	-1.04539	0.39123	2.67206	0.00753863	0.0708887
WBGene00006708	1109	ubc-13	8321.52	-0.268663	0.100598	2.67067	0.00757007	0.0711478
WBGene00012781	13171	nspd-7	249.194	-1.01086	0.378823	2.66842	0.00762098	0.071479
WBGene00220046	19942	R31.7	5.21493	-5.00721	1.8771	2.66752	0.00764125	0.0716323
WBGene00004041	7573	plg-1	144.758	-0.90046	0.337735	2.66617	0.00767205	0.0717666
WBGene00001638	14488	gly-13	1923.14	-0.378104	0.141939	2.66385	0.00772519	0.072086
WBGene00019289	16703	kcc-3	231.245	-0.621122	0.233413	2.66105	0.00778985	0.072615
WBGene00000752	3512	col-179	26604.5	-0.325043	0.122217	2.65955	0.00782442	0.0727656
WBGene00016607	1310	C43E11.9	3646.48	-0.293982	0.11055	2.65927	0.00783094	0.0727656
WBGene00007947	13594	C35A5.3	1318.3	-0.625814	0.235442	2.65804	0.00785964	0.0728934
WBGene00077574	33398	T08G5.16	4.97438	-4.87524	1.83584	2.65559	0.00791689	0.0733126
WBGene00021026	1909	W04C9.4	4208.88	-0.289928	0.109211	2.65475	0.00793661	0.0733835
WBGene00000402	4497	cdh-10	91.4507	-1.05414	0.397821	2.6498	0.00805406	0.0743188
WBGene00008724	17080	F13A7.1	165.422	-1.05089	0.397007	2.64704	0.00811999	0.074776
WBGene00018347	14743	F42C5.5	63.6952	-1.0727	0.405445	2.64572	0.00815166	0.074992
WBGene00016874	3310	C52B11.5	1175.83	-0.308636	0.116673	2.6453	0.00816182	0.0750098
WBGene00018253	15742	F40H6.1	57.903	-1.50775	0.570321	2.64369	0.00820071	0.0752914
WBGene00018138	21714	folt-2	10715.2	-0.456853	0.172826	2.64342	0.00820722	0.0753022
WBGene00008499	12584	cyp-37A1	1205.28	-0.448826	0.169822	2.64291	0.00821957	0.0753509
WBGene00013061	21113	Y51A2A.5	3.85547	-5.08222	1.92366	2.64195	0.0082429	0.0754511
WBGene00017131	17208	E04F6.15	332.468	-0.565236	0.213971	2.64165	0.00825029	0.0754633
WBGene00011796	13154	T16G1.2	27.7919	-1.43188	0.542498	2.63942	0.00830471	0.0759026
WBGene00008935	9130	F18C12.4	9.11286	-3.16091	1.19784	2.63883	0.00831922	0.0759972
WBGene00004439	594	rpl-25.2	53325.2	-0.295409	0.111989	2.63783	0.00834388	0.0761844
WBGene00012978	11186	Y48B6A.1	10645.6	-0.444798	0.168654	2.63735	0.00835572	0.0762543
WBGene00004419	3085	rpl-7A	73343.2	-0.510191	0.1935	2.63665	0.00837303	0.076374
WBGene00006430	2098	tag-51	1542.43	-0.346143	0.131293	2.63641	0.00837885	0.076389
WBGene00012007	14153	T25B9.1	1212.71	-0.374412	0.142248	2.63212	0.00848549	0.077207
WBGene00021908	7388	Y55B1AR.4	54.5416	-1.38912	0.52819	2.62997	0.00853928	0.077619
WBGene00021466	1418	eif-2gamma	20876.2	-0.485245	0.18458	2.62891	0.00856585	0.077783
WBGene00020757	3404	ucr-2.3	14816.4	-0.205584	0.0782074	2.6287	0.00857121	0.077793
WBGene00009501	10623	F37A8.1	15.9539	-2.4208	0.921053	2.62829	0.00858146	0.0778087
WBGene00008063	19579	C41G7.6	150.056	-1.14585	0.436026	2.62793	0.0085906	0.0778528
WBGene00020019	11315	R12B2.3	32.0549	-1.5065	0.5734	2.62731	0.0086064	0.0779573
WBGene00255598	17956	BE0003N10.6	143.492	-0.862008	0.328413	2.62477	0.00867077	0.0784625
WBGene00016825	6326	C50E10.1	105.189	-1.34006	0.510611	2.62443	0.00867947	0.0785023
WBGene00016474	15696	C36C5.5	570.698	-0.628659	0.239764	2.62199	0.00874188	0.0789885
WBGene00004416	587	rpl-5	111288	-0.454911	0.173612	2.62028	0.00878588	0.0792683
WBGene00019510	3850	K07H8.10	91535.9	-0.36289	0.138546	2.61927	0.00881183	0.0794365
WBGene00015889	11222	C17C3.3	82.7325	-1.37379	0.525653	2.61349	0.00896214	0.0804213
WBGene00013712	15184	dlc-6	4.28747	-4.75008	1.8187	2.6118	0.00900659	0.0807805
WBGene00001773	14005	gst-25	11.8972	-4.57838	1.75429	2.60982	0.00905889	0.0812097
WBGene00018359	22748	F42G8.8	54.1366	-1.58677	0.608658	2.607	0.00913389	0.0817214
WBGene00011043	2723	rbm-28	7712.49	-0.320842	0.123061	2.60717	0.00912942	0.0817214
WBGene00001067	526	dpy-5	953.089	-0.596705	0.229181	2.60364	0.00922405	0.0824473
WBGene00003951	9045	pbs-5	19752.2	-0.221751	0.0851832	2.60322	0.0092353	0.0825074
WBGene00015236	6282	B0511.11	294.179	-0.532027	0.204398	2.6029	0.00924403	0.082545
WBGene00011530	241	T06D8.10	174.504	-1.03122	0.396277	2.60227	0.00926097	0.0826031
WBGene00003119	5534	mac-1	7586.97	-0.422929	0.162531	2.60215	0.00926411	0.0826031
WBGene00022751	16153	msrp-2	553.249	-1.00781	0.387385	2.60157	0.00927984	0.082703
WBGene00022155	8404	Y71G12B.17	138.83	-0.861535	0.331233	2.60099	0.00929539	0.0828011
WBGene00000064	3994	act-2	93838.2	-0.445565	0.171369	2.60002	0.00932174	0.0829953
WBGene00008772	9632	irld-4	21.1307	-1.58271	0.609136	2.59829	0.00936905	0.0833759
WBGene00022002	20130	Y59E9AR.7	39.3057	-1.31573	0.506536	2.5975	0.00939046	0.083485
WBGene00016327	22207	C32E12.1	110.704	-1.14312	0.440145	2.59715	0.00940009	0.0835267
WBGene00012747	1239	Y40H7A.10	1435.31	-0.539371	0.20769	2.597	0.0094043	0.0835267
WBGene00017720	22737	F22F7.2	106.18	-0.796351	0.306891	2.5949	0.0094619	0.0839973
WBGene00001066	1029	dpy-4	918.506	-0.882212	0.340042	2.59442	0.00947495	0.0840723
WBGene00000546	22467	clp-6	142.56	-0.785663	0.303366	2.58982	0.00960266	0.0849165
WBGene00009782	17096	F46C5.7	8.83885	-2.44658	0.945278	2.58821	0.00964765	0.084985
WBGene00022890	3935	fbxa-224	14.2497	-2.33955	0.903785	2.58861	0.00963637	0.084985
WBGene00012324	5222	rhy-1	1476.33	-0.375563	0.145068	2.58888	0.00962892	0.084985
WBGene00001725	10502	grl-16	587.332	-0.641385	0.247926	2.587	0.00968151	0.0852421
WBGene00021595	6886	Y46E12BL.2	5664.78	-0.461232	0.178464	2.58445	0.00975344	0.08571
WBGene00012713	8234	bckd-1A	7654.64	-0.527552	0.204209	2.58339	0.00978341	0.0858907
WBGene00021425	7374	ppgn-1	5254.32	-0.229637	0.0889133	2.5827	0.00980296	0.0859797
WBGene00010633	15125	nspd-2	337.45	-1.13557	0.440161	2.5799	0.00988276	0.0865161
WBGene00011559	12153	umps-1	8434.49	-0.261962	0.10154	2.57989	0.00988309	0.0865161
WBGene00007610	21538	C15H7.3	82.3706	-1.20165	0.466082	2.57819	0.00993201	0.0868194
WBGene00021731	414	Y49G5A.1	151.13	-0.757153	0.294035	2.57504	0.0100228	0.0874876
WBGene00019220	866	pfd-2	3162.6	-0.290894	0.112986	2.5746	0.0100356	0.0875154
WBGene00002061	8523	ife-3	22408.2	-0.236413	0.0918776	2.57313	0.0100783	0.0877199
WBGene00010611	18630	K07A1.4	67.59	-1.382	0.537412	2.57158	0.0101237	0.0880733
WBGene00017027	22221	D1044.1	526.188	-0.741212	0.288817	2.56637	0.0102768	0.0891502
WBGene00044911	19338	H38K22.6	11.2136	-2.76573	1.07838	2.5647	0.0103265	0.0894537
WBGene00009938	15612	F52F12.5	85.9863	-0.95059	0.370682	2.56444	0.0103344	0.0894795
WBGene00007192	9096	B0491.5	13798.5	-0.363281	0.141788	2.56214	0.0104031	0.0899478
WBGene00007503	9618	C09H10.9	40.7495	-1.5828	0.618753	2.55805	0.0105261	0.0907522
WBGene00000649	3007	col-73	1849.05	-0.654376	0.255798	2.55817	0.0105224	0.0907522
WBGene00019768	6841	M04F3.2	484.225	-0.399131	0.156045	2.5578	0.0105337	0.0907749
WBGene00013070	15175	Y51A2B.6	21.5993	-2.00447	0.78404	2.5566	0.0105702	0.0909286
WBGene00009884	15113	F49C12.15	927.836	-0.469176	0.183514	2.55662	0.0105695	0.0909286
WBGene00018563	7330	F47D12.7	125.083	-0.94195	0.368743	2.55449	0.0106343	0.0912972
WBGene00002208	20978	kin-26	32.2378	-1.61721	0.633381	2.5533	0.0106709	0.0915036
WBGene00009554	8153	F39B2.3	2580.32	-0.270909	0.106112	2.55305	0.0106784	0.0915036
WBGene00000864	15480	cya-2	47.2995	-1.39278	0.545723	2.55218	0.010705	0.0915595
WBGene00017749	3338	rpoa-49	3639.15	-0.218729	0.0857486	2.55082	0.010747	0.091796
WBGene00012692	5712	Y39B6A.33	6396.22	-0.457969	0.179555	2.55058	0.0107543	0.091809
WBGene00002249	19491	lap-1	12840.6	-0.266135	0.10437	2.54992	0.0107746	0.0918967
WBGene00015108	22183	B0281.1	2.84956	-6.643	2.60624	2.54888	0.0108069	0.0919995
WBGene00015907	21147	C17F3.1	83.8157	-1.09916	0.4312	2.54908	0.0108008	0.0919995
WBGene00004394	2079	rol-1	688.666	-0.68661	0.269371	2.54893	0.0108053	0.0919995
WBGene00022440	8407	Y110A2AL.3	33.8904	-1.65294	0.648832	2.54757	0.0108477	0.092175
WBGene00016333	5784	C32F10.8	21878.8	-0.167569	0.0657914	2.54698	0.010866	0.0922445
WBGene00018997	1370	F57B9.3	441.508	-0.66276	0.260249	2.54663	0.0108768	0.0922935
WBGene00015661	8274	C09H5.7	27.7997	-2.00864	0.788808	2.54642	0.0108834	0.0923062
WBGene00021967	15320	Y57G7A.3	5.25732	-4.99553	1.96305	2.54477	0.0109349	0.092499
WBGene00010241	7157	F58D2.2	156.311	-0.880646	0.34607	2.5447	0.0109371	0.092499
WBGene00012344	750	ola-1	25892.4	-0.17698	0.0695891	2.54321	0.010984	0.0927718
WBGene00021198	1913	npp-26	27.9522	-1.43823	0.56586	2.54167	0.0110325	0.0931385
WBGene00014197	6746	ZK1053.2	98.0958	-0.855487	0.336678	2.54096	0.0110548	0.093255
WBGene00001702	14002	grd-13	309.619	-0.535294	0.210684	2.54075	0.0110616	0.093255
WBGene00018793	3365	mrpl-40	3262.32	-0.267737	0.105374	2.54082	0.0110593	0.093255
WBGene00000731	9989	col-158	123.466	-0.819936	0.322877	2.53947	0.0111022	0.0934675
WBGene00009925	200	F52B11.2	3121.33	-0.238198	0.0938399	2.53834	0.0111379	0.0936819
WBGene00002250	1543	lap-2	29630.5	-0.312594	0.123165	2.53802	0.0111481	0.0937245
WBGene00022874	14822	nep-25	20.1374	-1.71982	0.677728	2.53763	0.0111607	0.0937866
WBGene00020841	22786	T27A3.5	89.3145	-0.914298	0.360419	2.53676	0.0111882	0.0939749
WBGene00020117	1395	R155.3	48.5112	-1.40722	0.555533	2.5331	0.0113058	0.0948314
WBGene00001841	21980	hen-1	52.0232	-1.43123	0.565309	2.53176	0.0113492	0.095152
WBGene00022279	6422	sesn-1	2324.2	-0.474933	0.187773	2.5293	0.0114292	0.0956027
WBGene00005017	1589	sqt-2	332.539	-0.72316	0.285988	2.52864	0.0114505	0.0957375
WBGene00018314	14260	F41H10.1	381.993	-0.591787	0.234254	2.52626	0.0115283	0.0961819
WBGene00008843	21560	arrd-9	54.293	-1.06109	0.420129	2.52562	0.0115495	0.096235
WBGene00000681	5503	col-107	707.056	-0.643711	0.254881	2.52554	0.0115522	0.096235
WBGene00020860	3405	nspd-10	141.191	-1.63254	0.646764	2.52416	0.0115975	0.0964362
WBGene00002024	9019	hsp-43	8725.69	-0.294273	0.116575	2.52432	0.0115922	0.0964362
WBGene00013192	14667	Y54E2A.7	53.033	-1.69038	0.669768	2.52383	0.0116085	0.0964402
WBGene00003130	4058	map-2	14286	-0.516227	0.204756	2.52118	0.0116963	0.0970022
WBGene00004506	12033	rpt-6	15414.9	-0.211105	0.0837348	2.52112	0.0116982	0.0970022
WBGene00015516	10249	C06A8.6	115.248	-0.741258	0.294107	2.52037	0.0117232	0.0970831
WBGene00004467	2581	rpn-11	16998.3	-0.235875	0.0936433	2.51887	0.0117732	0.0974533
WBGene00001710	7022	grl-1	12.1969	-2.46189	0.977936	2.51743	0.0118214	0.0977579
WBGene00011262	19121	pho-8	391.216	-0.845617	0.336335	2.51421	0.0119299	0.0983045
WBGene00044894	4953	Y71F9AR.4	588.63	-0.414743	0.165182	2.51083	0.0120447	0.0990268
WBGene00013254	9229	tag-276	272.349	-0.585868	0.233632	2.50765	0.0121537	0.0997881
WBGene00008953	9132	F19C6.4	514.707	-0.591509	0.235918	2.50726	0.012167	0.0998523
WBGene00012180	15157	W01D2.3	34.4432	-1.93952	0.774153	2.50534	0.0122333	0.100352
WBGene00008151	4140	rrp-1	4179.13	-0.308161	0.123034	2.50468	0.0122563	0.100426
WBGene00005256	7067	srh-33	3.85295	-5.70465	2.27925	2.50286	0.0123195	0.100742
WBGene00000881	4510	cyn-5	19904.1	-0.319252	0.127548	2.50299	0.0123147	0.100742
WBGene00010084	1179	F55B11.2	6198.83	-0.22833	0.0912415	2.50248	0.0123328	0.100795
WBGene00016073	1297	C24H12.4	7354.28	-0.339279	0.135593	2.50218	0.0123432	0.1008
WBGene00017123	5806	maoc-1	4560.49	-0.459779	0.183992	2.4989	0.0124579	0.101555
WBGene00020277	12312	T06A1.1	11.4219	-3.39752	1.36112	2.49613	0.0125557	0.10219
WBGene00010920	8672	M117.4	61.2216	-1.15895	0.4652	2.49129	0.0127281	0.103159
WBGene00021475	3902	tbca-1	2485.49	-0.353599	0.141933	2.4913	0.0127275	0.103159
WBGene00014116	15194	ZK858.2	206.633	-0.714478	0.287065	2.48891	0.0128135	0.103759
WBGene00021963	12343	lipl-6	22.943	-1.37823	0.553984	2.48785	0.0128519	0.103931
WBGene00000742	18483	col-169	194.715	-0.794134	0.319201	2.48788	0.0128506	0.103931
WBGene00011425	9186	T04B2.7	55.9946	-1.13788	0.457413	2.48765	0.012859	0.103942
WBGene00020673	11328	T22B7.4	437.615	-0.436812	0.175665	2.48662	0.0128964	0.104153
WBGene00021207	11841	ptp-5.3	87.9904	-1.19438	0.480466	2.48589	0.0129229	0.104321
WBGene00017166	5807	aldo-2	52887.7	-0.359108	0.144504	2.48512	0.0129509	0.104493
WBGene00003129	4544	map-1	3971.97	-0.322301	0.1297	2.48498	0.0129557	0.104493
WBGene00016524	9281	C39B5.6	2517.24	-0.316742	0.127537	2.48353	0.0130087	0.10484
WBGene00008650	18583	F10D11.4	8.99176	-4.5026	1.81373	2.48251	0.013046	0.105082
WBGene00009670	20035	F43G9.8	11.9852	-2.18788	0.882815	2.4783	0.0132008	0.105955
WBGene00007335	18057	C05C12.1	57.7438	-1.02079	0.41195	2.47794	0.0132142	0.106016
WBGene00007538	15071	C12D8.9	9.63701	-2.52291	1.01967	2.47424	0.0133521	0.106981
WBGene00007597	19568	C15A11.2	32.9623	-1.41076	0.571095	2.47028	0.0135008	0.107935
WBGene00010556	4688	rack-1	115467	-0.403635	0.163388	2.47041	0.0134957	0.107935
WBGene00194652	8936	F15H9.8	15.2792	-1.84278	0.746068	2.46999	0.0135118	0.107976
WBGene00000670	13	col-95	14546.6	-0.535325	0.21683	2.46887	0.013554	0.108219
WBGene00045508	19830	D1081.10	5.27061	-4.40963	1.78654	2.46825	0.0135774	0.108358
WBGene00019148	11793	H03E18.1	247.756	-0.605835	0.245626	2.46649	0.0136443	0.108844
WBGene00012717	17634	Y39E4B.6	1791.57	-0.423714	0.171862	2.46544	0.0136846	0.109071
WBGene00007129	21045	B0272.3	3750.46	-0.220127	0.0893046	2.4649	0.0137051	0.109146
WBGene00010922	8176	M142.5	3224.66	-0.180044	0.0732227	2.45886	0.013938	0.1108
WBGene00016195	1300	erd-2.2	6964.89	-0.239356	0.0974026	2.45739	0.0139952	0.111157
WBGene00003055	17006	lon-1	3804.06	-0.460467	0.18741	2.457	0.0140102	0.111223
WBGene00006530	7079	tba-4	4934.6	-0.299529	0.122	2.45516	0.0140822	0.111655
WBGene00015386	21666	C03B8.3	72.5622	-0.909117	0.370506	2.45372	0.0141388	0.112054
WBGene00009972	2688	oac-33	32.6216	-1.70591	0.69695	2.44768	0.0143779	0.113752
WBGene00012867	757	seld-1	1248.53	-0.390816	0.159795	2.44573	0.0144559	0.11427
WBGene00015422	17179	C04E6.5	28.6099	-1.6022	0.655195	2.44537	0.0144702	0.114334
WBGene00017788	22243	F25E5.7	17.2369	-2.34243	0.95942	2.44151	0.014626	0.115216
WBGene00015816	5286	C16A11.3	1459.65	-0.330644	0.135599	2.43841	0.0147522	0.115909
WBGene00004703	3089	rsp-6	15561.7	-0.345506	0.141745	2.43752	0.0147883	0.116093
WBGene00022125	21769	Y71F9B.1	402.116	-0.409165	0.167882	2.43722	0.0148006	0.116139
WBGene00013151	17147	nsun-5	1732.44	-0.313771	0.128765	2.43676	0.0148195	0.116188
WBGene00021747	13314	Y50D4C.2	876.581	-0.430044	0.176556	2.43574	0.0148614	0.116417
WBGene00018926	15761	F56A11.6	96.9797	-0.848018	0.348179	2.43558	0.0148679	0.116417
WBGene00012146	18651	VB0393L.2	26.7355	-1.62591	0.668385	2.4326	0.0149908	0.117279
WBGene00021660	7380	nol-14	4828.91	-0.314734	0.1294	2.43225	0.0150052	0.117341
WBGene00020549	4894	nmt-1	12081.6	-0.387303	0.159297	2.43132	0.0150438	0.117492
WBGene00006047	621	ssp-19	77.3405	-1.16572	0.479664	2.43028	0.0150873	0.117782
WBGene00015165	20079	B0361.11	30.7756	-2.01068	0.827816	2.42889	0.015145	0.118023
WBGene00019920	6385	acs-15	70.955	-1.09033	0.448903	2.42888	0.0151457	0.118023
WBGene00009993	4679	F53F4.11	13336.2	-0.285372	0.117508	2.42853	0.0151603	0.118023
WBGene00015997	6764	C18H7.7	19.7037	-2.53495	1.04425	2.42752	0.0152023	0.118083
WBGene00012676	22132	pro-3	4091.97	-0.322041	0.132653	2.42769	0.0151952	0.118083
WBGene00003607	2556	nhr-8	845.445	-0.749939	0.309181	2.42556	0.0152846	0.118566
WBGene00007793	22040	C28D4.5	86.0436	-0.925975	0.382116	2.42328	0.0153809	0.119106
WBGene00044243	7418	F16C3.4	20.9175	-2.08199	0.860219	2.4203	0.0155075	0.119934
WBGene00007615	1130	set-31	3275.48	-0.263375	0.108834	2.41997	0.0155216	0.119976
WBGene00008532	2653	dpt-1	13525.5	-0.205356	0.0848638	2.41983	0.0155277	0.119976
WBGene00018168	15252	irld-7	9.28059	-2.76787	1.14456	2.41828	0.0155943	0.120335
WBGene00012012	12161	T25B9.6	94.5879	-1.17042	0.48403	2.41808	0.0156028	0.120335
WBGene00008659	11114	clec-151	89.62	-0.925292	0.382599	2.41844	0.0155874	0.120335
WBGene00001385	3525	far-1	25576.9	-0.355048	0.146955	2.41603	0.0156908	0.120824
WBGene00008074	12079	nkb-2	109.657	-0.824467	0.341415	2.41485	0.0157417	0.121078
WBGene00004415	6562	rpl-4	167316	-0.478584	0.19825	2.41404	0.0157766	0.121244
WBGene00009269	11629	F30A10.12	34.3462	-1.69788	0.703759	2.41259	0.0158395	0.121676
WBGene00021898	1930	Y54G2A.36	1136.8	-0.455188	0.188798	2.41098	0.0159099	0.122126
WBGene00015531	13206	C06E4.2	42.4362	-1.07734	0.447185	2.40916	0.0159894	0.122467
WBGene00019531	22764	scrm-5	55.5793	-1.17963	0.489821	2.40829	0.0160277	0.122661
WBGene00001683	4039	gpd-1	22966.5	-0.343184	0.142507	2.4082	0.0160315	0.122661
WBGene00012191	14652	W02A2.8	49.1108	-1.54075	0.6403	2.40629	0.0161154	0.123077
WBGene00013835	21645	mlt-4	242.793	-0.578557	0.240537	2.40527	0.0161604	0.123207
WBGene00013489	11194	col-42	46080.1	-0.325713	0.135416	2.40527	0.0161603	0.123207
WBGene00022156	9894	Y71G12B.18	20.7026	-3.42736	1.42618	2.40318	0.0162534	0.123762
WBGene00000988	21971	dhs-25	5128.58	-0.612059	0.254737	2.40271	0.0162741	0.123816
WBGene00019150	12280	H04J21.1	32.941	-1.4658	0.610225	2.40207	0.0163025	0.123981
WBGene00001074	527	dpy-13	1010.46	-0.67283	0.280391	2.39961	0.0164125	0.124506
WBGene00009812	12611	suca-1	9382.95	-0.447134	0.186326	2.39974	0.0164066	0.124506
WBGene00012330	21627	zip-3	2097.6	-0.321372	0.134021	2.39792	0.0164883	0.12477
WBGene00020105	17762	R148.7	112.442	-0.790458	0.329767	2.39702	0.0165291	0.124923
WBGene00014121	14682	ZK858.8	97.5934	-0.981556	0.410183	2.39297	0.0167127	0.126059
WBGene00013826	4757	Y116F11B.10	92.4475	-0.797275	0.333178	2.39294	0.016714	0.126059
WBGene00014240	12203	htas-1	99.0252	-0.89101	0.37243	2.39242	0.0167377	0.126134
WBGene00007699	22563	C24H11.1	3.90927	-5.19946	2.17422	2.39141	0.0167836	0.126271
WBGene00002891	11522	let-767	14068.5	-0.265892	0.111217	2.39075	0.0168138	0.126446
WBGene00018711	17226	F52G3.3	23.6855	-1.77374	0.742557	2.3887	0.0169083	0.126874
WBGene00013481	23412	Y69H2.3	8580.71	-0.467779	0.195833	2.38867	0.0169096	0.126874
WBGene00004446	71	rpl-32	57487.9	-0.34359	0.143868	2.38823	0.0169299	0.126874
WBGene00013035	22654	Y49E10.16	1978.9	-0.3038	0.127306	2.38638	0.0170151	0.127383
WBGene00014258	13718	ZK1320.9	8969.59	-0.186006	0.0779529	2.38613	0.0170266	0.127417
WBGene00012831	16620	Y43F8C.9	60.3994	-1.01649	0.426162	2.38523	0.0170687	0.127627
WBGene00021006	17774	dct-9	34.0529	-1.52291	0.6393	2.38216	0.0172116	0.128485
WBGene00015043	16650	cyp-34A8	812.696	-0.381496	0.160164	2.38191	0.0172231	0.128518
WBGene00007693	5115	C23H4.4	199.859	-0.581729	0.244251	2.38168	0.0172337	0.128545
WBGene00018813	8332	F54D11.3	651.957	-0.371105	0.156032	2.3784	0.0173881	0.129432
WBGene00014029	15190	ZK637.12	68.4613	-0.970045	0.40789	2.37821	0.0173971	0.129447
WBGene00013987	15669	ZK512.8	105.952	-0.814661	0.342608	2.37783	0.0174151	0.129517
WBGene00016946	11245	C55B7.10	37.1246	-1.2168	0.511935	2.37686	0.0174608	0.129709
WBGene00194643	8935	C48D1.9	16.3184	-1.82607	0.76925	2.37383	0.0176047	0.130512
WBGene00044476	17309	F56D6.14	5.74265	-4.781	2.01436	2.37346	0.0176222	0.130536
WBGene00017650	22735	F21A9.1	10.1296	-3.8977	1.64214	2.37354	0.0176183	0.130536
WBGene00016132	22705	C26B9.2	5.86333	-3.64206	1.53471	2.37313	0.0176382	0.130601
WBGene00012492	4243	fbxb-7	220.28	-0.51834	0.218506	2.3722	0.0176823	0.130716
[truncated: 9,258 more rows]
